# Supplementary material for: Small RNA-seq analysis of single porcine blastocysts revealed that maternal estradiol-17beta exposure does not affect miRNA isoform (isomiR) expression
Source: BMC Genomics. 2018 Aug 6;19:590. doi: 10.1186/s12864-018-4954-9 (PMC6090871; doi:10.1186/s12864-018-4954-9)
Supplement: Supplementary file 3 — Table S1. Filtering details for potential miRNAs. (XLSX 73 kb) [file 12864_2018_4954_MOESM3_ESM.xlsx]

## Sheet: Sheet1
miRNA_symbol	f000_S03_E01	f000_S09_E02	f000_S11_E03	f000_S11_E01	f000_S12_E02	f000_S12_E01	f010_S02_E01	f010_S04_E03	f010_S04_E01	f010_S07_E01	f010_S08_E01	f010_S08_E02	f1000_S01_E01	f1000_S01_E02	f1000_S05_E01	f1000_S05_E02	f1000_S06_E02	f1000_S10_E02	m000_S03_E02	m000_S09_E01	m000_S11_E02	m000_S12_E03	m000_S12_E04	m000_S12_E05	m010_S02_E03	m010_S02_E02	m010_S04_E02	m010_S04_E04	m010_S07_E02	m010_S07_E03	m1000_S01_E03	m1000_S05_E03	m1000_S06_E01	m1000_S06_E03	m1000_S10_E01	m1000_S10_E03	count_sum	percent	count_percent	rank	rpm	log2 rpm
mir-21	63885	274291	104319	207402	310377	280371	421638	171111	138156	214121	441548	464561	101001	194962	310347	271988	232632	252472	80383	214340	78873	140414	213628	222372	302114	228829	78718	152355	172983	300439	116896	303172	315419	138632	247224	176305	7938278	22.1764	22.1764	1	221764	17.7587
mir-371-5p	117628	233810	145101	166343	194451	279949	175786	285162	159058	109067	244416	350708	78387	215833	164871	141674	124600	142336	101439	132705	124601	133102	158834	182757	123353	79719	79978	158432	139637	217209	128890	230987	287359	88971	143443	117199	5957795	16.6437	38.8201	2	166437	17.3446
mir-302b	57610	106857	77256	45816	106359	85349	62870	93734	60102	48863	121946	199968	25711	66561	156594	73377	32629	84998	36212	119333	26350	61079	31926	65608	70264	49704	42610	48291	50980	71029	34867	131559	101410	29241	79915	41833	2598811	7.26003	46.0801	3	72600.3	16.1477
mir-378	19533	74718	31803	55458	75416	61243	66861	58894	46652	45606	91248	133289	25316	52182	89223	66138	47003	61756	24816	45630	28920	33533	47406	46669	58261	43289	25665	48953	39587	65467	33524	79048	62802	29344	68939	40622	1924814	5.37716	51.4572	4	53771.6	15.7146
mir-7	13986	27298	17925	45382	30813	41071	56901	43933	35608	25651	48804	57972	15797	38557	32622	27370	43411	26603	22645	26848	21791	16107	28112	25963	36242	26468	16720	39555	31424	49726	22921	33556	53998	26338	34756	26947	1169821	3.26801	54.7253	5	32680.1	14.9961
mir-200b	8777	47136	13087	25081	32551	44516	42153	16592	22989	19804	60445	76788	14889	28904	48792	37003	27887	18849	7047	36514	11629	21105	19259	19315	29085	28054	10734	13343	13933	28030	16210	40949	71769	14807	28799	12936	1009761	2.82087	57.5461	6	28208.7	14.7839
mir-30d	9761	30133	13680	37342	24110	28004	60024	29899	25622	25126	48176	42526	14878	28617	35657	25519	35100	24290	16169	23104	21437	12054	23243	22980	41559	23790	11941	29900	27477	39454	19500	36616	46015	18603	28364	21243	1001913	2.79894	60.3451	7	27989.4	14.7726
mir-20a	9244	31052	15145	24210	41500	33546	40956	22091	16260	29578	53154	62852	11227	20733	40215	39384	25444	35633	11075	29335	8725	20490	24889	25152	39114	30654	12010	19156	21444	32626	12988	42968	34268	15456	34474	19679	986727	2.75652	63.1016	8	27565.2	14.7506
mir-302d	14911	39488	22902	21351	30477	42467	34032	45066	26351	12283	37715	70442	12525	29973	41014	21521	16176	21649	9284	32817	10973	16941	18189	29715	21253	12527	11083	21197	21808	33621	17279	38752	49894	15768	21024	19930	942398	2.63268	65.7343	9	26326.8	14.6842
mir-92a	14182	26532	22037	26456	25950	39689	30329	45211	27803	14790	38260	42027	11600	27893	27894	17460	17723	18996	12643	24140	19453	19307	20540	23996	20612	11695	11166	24498	20836	29403	18929	32668	54800	15101	21219	16255	872093	2.43628	68.1705	10	24362.8	14.5724
mir-302a	12066	34904	17780	18801	29347	28481	28848	32388	21302	13922	33518	53705	10369	24707	49026	26624	15062	22454	10350	27087	8967	14070	14729	20179	21020	15399	11580	17013	18344	26782	13318	34863	30615	10865	25289	15008	808782	2.25941	70.43	11	22594.1	14.4637
mir-128	7319	19066	11441	26683	13763	19074	35459	19208	15241	20744	25738	24139	8909	19165	33307	19280	20168	17766	13016	12762	14820	7580	13766	16899	26113	16948	7695	22304	13541	21193	13450	32731	29470	10291	24203	11912	665164	1.8582	72.2882	12	18582	14.1816
mir-200a	3629	20287	7402	12285	17757	32208	26221	10494	11296	10037	32311	46773	10060	15219	18170	14234	14775	11062	2161	24004	4732	11626	13593	14648	17660	12814	4707	8219	8832	19471	11336	22539	52092	9472	11635	9530	573291	1.60154	73.8897	13	16015.4	13.9672
mir-2033p	5672	15693	9046	12091	21217	20589	17170	14006	9321	13751	23561	28986	5458	14041	25351	16227	11926	15613	5350	14825	6534	12119	12481	16457	16827	10558	7402	12290	11348	19755	7432	23213	18489	8089	14500	9635	507023	1.41642	75.3061	14	14164.2	13.79
mir-1483p	4234	14964	6518	12668	13778	16936	22623	15676	10485	9260	22571	33661	7094	13577	17223	12358	14866	11787	4393	10400	4862	6668	13290	14424	12601	12834	4871	9328	13820	22221	9901	18578	24713	8132	13661	10211	475187	1.32748	76.6336	15	13274.8	13.6964
mir-26a	4025	17974	6579	10533	8770	12647	37048	12993	9741	6263	19993	19958	5616	11959	11183	5505	10633	7656	3036	10710	5392	5209	6231	9150	18632	7007	3301	8018	8481	13705	8345	12478	27573	8743	6482	10923	392492	1.09647	77.7301	16	10964.7	13.4206
mir-3025p	5906	9472	7950	12192	11941	14465	16583	15842	10641	5707	13731	12390	6520	14754	17719	9716	8268	11137	5705	9969	5589	6362	8211	10826	9322	6743	5162	8731	8949	12296	9159	16333	13598	5416	13228	8756	369289	1.03165	78.7617	17	10316.5	13.3327
mir-22-3p	3860	6666	6965	9293	12839	17472	13306	10889	7028	7197	16146	21086	5385	10208	8279	6363	8896	9281	3155	9293	4459	6651	10913	12970	10110	5955	3347	9350	7893	15137	7106	12463	16994	5919	7571	8850	339295	0.947854	79.7096	18	9478.54	13.2104
mir-105p	765	23477	3687	9203	6040	4504	41411	4832	4928	7431	20409	11684	5615	8984	4565	3351	16808	5592	1124	7664	3421	2960	4105	4607	22097	12535	1690	3276	7252	11229	7088	6089	27865	8980	5800	12082	333150	0.930687	80.6403	19	9306.87	13.1841
mir-1307	4555	13783	6302	9218	10069	8481	10825	9687	8808	8894	16250	20577	4245	9261	12916	10088	7709	9550	7613	7130	6714	4987	7001	7657	12391	8839	6207	10002	7324	9035	5941	12780	10756	3864	13465	5509	328433	0.91751	81.5578	20	9175.1	13.1635
mir-423-3p	4803	8594	6011	11743	8626	9457	13720	12262	9017	8030	16242	13460	4609	8812	11644	7499	9328	9213	6150	7910	6927	4904	6483	8606	11637	8090	4474	11928	8948	10954	6669	13283	16348	4954	9982	6390	327707	0.915482	82.4732	21	9154.82	13.1603
mir-191	7061	13760	8325	6950	11248	13038	10062	11279	7887	5988	16047	21857	3502	9140	9733	4753	5479	7484	5727	11002	5693	7708	4938	7773	9267	4699	3741	6597	6643	9817	5588	9321	19930	5973	7172	5625	310807	0.86827	83.3415	22	8682.7	13.0839
mir-30e-5p	3478	9447	5702	7715	10321	16471	10288	11566	7371	4116	13380	16915	4012	8521	7758	5014	5752	7622	2491	7886	4528	6356	7558	11217	7048	3303	3092	7743	6590	10377	6211	10074	16590	6053	5364	7651	285581	0.797799	84.1393	23	7977.99	12.9618
le7i	726	17311	3017	7195	5947	5695	28617	4509	4009	4812	16770	9248	6739	8661	2810	1452	13512	4088	661	6563	2219	3341	3754	6220	13127	8073	1120	2745	5787	9593	7415	4503	31170	9513	4184	15079	280185	0.782724	84.922	24	7827.24	12.9343
mir-10b	2233	8422	4854	7471	10436	10524	9602	7962	5183	7363	10658	12923	3102	8222	17154	12280	8164	7438	4200	6288	4241	5003	7973	7537	7071	6100	2748	5759	6895	10974	4851	14983	9994	4597	10086	4447	277738	0.775888	85.6979	25	7758.88	12.9216
mir-7-1	3216	6253	4014	9857	7118	9487	13204	9960	8103	5523	11349	13432	3465	8874	7572	5879	9124	5626	4793	5938	5007	3747	6142	6031	7562	5774	3440	8726	6817	11666	4755	7248	12503	5738	7376	5904	261223	0.729752	86.4277	26	7297.52	12.8332
mir-305p	1866	12446	4268	7213	5370	6917	25627	8830	5588	4324	15966	16788	3508	6252	5963	3489	7851	4599	1468	8171	3488	3129	3809	4377	14297	5708	2143	4410	5914	9158	4392	6767	17359	5620	4673	5632	257380	0.719016	87.1467	27	7190.16	12.8118
mir-2003p	1534	6733	2229	6560	5613	11346	9409	4095	5207	4258	11597	13209	3771	6128	8941	7228	7485	3775	1437	6561	2454	3430	5317	4654	6095	5814	2185	3865	3559	6962	3852	9198	17979	3505	5841	2781	214607	0.599526	87.7462	28	5995.26	12.5496
mir-1285	4516	1616	3000	8369	8558	7398	5193	2748	3732	1089	21530	1014	3394	3848	2854	5160	3340	7758	5132	2898	6151	3246	7256	647	4092	776	3687	6743	2645	5154	4420	19441	8542	4038	4162	3637	187784	0.524593	88.2708	29	5245.93	12.357
le7a	1090	14442	2839	3963	2862	3348	18068	4923	3473	3194	9282	6499	2856	5042	1876	715	6245	1903	813	4912	2073	2220	1425	2905	8006	3700	773	1859	2960	6636	4546	2452	24072	6175	1970	7116	177233	0.495118	88.7659	30	4951.18	12.2736
mir-99a	408	9293	1694	4199	2509	1933	28438	3584	3356	3273	9293	8588	3303	4184	2670	1809	6113	2577	414	4954	1482	1266	1908	2061	16854	6595	933	2029	3602	5734	4839	3172	11274	3338	2174	5100	174953	0.488748	89.2547	31	4887.48	12.2549
mir-183	1975	5122	3136	6091	4435	5118	8993	4787	3808	5450	8035	8556	2070	4760	6893	4412	6984	3988	2403	3880	2479	2398	3569	3175	6547	4922	1872	3931	3550	5897	2061	5165	6893	2889	5447	2628	164319	0.459041	89.7137	32	4590.41	12.1644
mir-200c	684	16782	2424	2301	3272	2328	10587	2881	2442	3268	10088	10470	2024	3500	1858	895	4024	2143	394	5681	1162	2448	1008	2339	8807	4459	888	1115	2994	4385	2860	2430	16962	3736	1725	4237	149601	0.417925	90.1316	33	4179.25	12.029
mir-122	1964	3796	3409	7432	4745	5084	6289	3885	3492	4640	7226	3299	1437	5698	8274	4255	4423	2447	4804	4145	4107	2953	2612	3249	6032	3240	1625	2601	3883	4596	2375	5333	3675	2155	7696	2678	149554	0.417794	90.5494	34	4177.94	12.0286
mir-21-5p	1150	6373	1949	4305	5214	4982	7623	3100	2581	3687	7148	8427	2433	4159	4396	4028	4862	4390	1543	3343	1816	2423	4429	3666	5452	3866	1438	2994	3508	4901	2971	5147	5757	2852	4334	3805	145052	0.405217	90.9547	35	4052.17	11.9845
mir-34c	196	3383	1307	4223	1477	963	26565	3090	2670	4225	12073	9169	1020	1160	2038	1733	5313	785	162	6202	934	478	720	594	14351	5201	734	1448	4325	6942	1298	2010	8758	2855	719	698	139819	0.390598	91.3453	36	3905.98	11.9315
mir-532-5p	931	3136	1921	4598	3260	3775	6520	3765	3089	2797	6251	5042	1834	2979	3676	3100	4398	2647	1304	2800	2110	1478	3279	3100	4425	3195	1619	3655	2875	4914	2399	4217	5810	2319	3879	3022	120119	0.335564	91.6808	37	3355.64	11.7124
le7f	703	7053	1628	2344	1901	2338	9735	3253	2137	1638	5909	4852	1800	2815	1246	726	3809	1399	450	2746	939	1151	1184	1733	4778	2042	614	1394	1881	3562	2344	1528	11063	3126	1264	3859	100944	0.281997	91.9628	38	2819.97	11.4615
mir-151-3p	1419	3092	1976	2747	3818	2900	4595	2675	2254	2362	4640	5924	1126	3015	4724	3372	2467	3629	1971	2407	1308	1860	1945	2071	3825	2873	1702	1916	1963	2675	1633	4455	3105	1324	4281	1778	99827	0.278877	92.2417	39	2788.77	11.4454
mir-3783p	1026	3254	1789	2619	3797	2755	3023	2466	1773	2946	4686	6474	1041	2285	4909	3509	1950	3650	1249	2529	1279	1746	1951	2092	3202	2590	1315	2263	2048	3513	1392	4224	3125	1320	3750	1703	95243	0.266071	92.5078	40	2660.71	11.3776
mir-182	1474	3621	2619	2492	3626	4256	3684	3082	1952	2307	4563	6349	1190	3119	3434	2247	2706	2281	1100	2549	1470	2080	2106	1892	2695	1633	1006	1550	1873	3134	1428	2745	4549	1754	2407	1532	92505	0.258422	92.7662	41	2584.22	11.3355
mir-273p	366	5067	1152	1630	2029	1763	8420	1644	1226	1607	5931	6063	1424	2033	1298	907	3004	1905	296	3398	545	1292	1341	1868	6119	3486	553	902	1692	3059	1947	1629	7433	2298	1541	2849	89717	0.250633	93.0168	42	2506.33	11.2914
mir-2005p	900	2718	924	2445	2845	2893	3409	1384	2022	2087	4792	6981	1670	2321	5377	4110	2610	2293	856	2711	770	1391	2047	1722	2760	3597	1026	1553	1164	2194	1523	3813	4306	780	3998	1035	89027	0.248706	93.2655	43	2487.06	11.2802
mir-429	639	3055	1305	1674	2326	5061	3149	2013	2044	1314	4908	8130	1236	2219	2587	2057	2294	1426	230	4411	687	1778	1781	2187	2185	1287	760	1423	1495	3286	1431	2975	9289	1646	1400	1128	86816	0.242529	93.5081	44	2425.29	11.2439
mir-423-5p	2412	2825	1908	4366	1381	1810	4543	3086	2375	1884	3357	2900	889	1953	2695	1154	2223	2141	4384	1703	2919	1101	1111	1653	2678	1997	975	2896	2028	2231	1522	2936	5182	1274	2102	1303	83897	0.234375	93.7424	45	2343.75	11.1946
mir-17-5p	1365	3607	2457	920	3134	3790	1154	3106	1509	1021	3732	10421	451	1389	1893	1232	707	1695	453	3728	698	2852	934	2033	1465	681	893	1125	1326	2169	812	2502	4735	1186	943	943	73061	0.204103	93.9465	46	2041.03	10.9951
le7g	310	5606	1061	1348	1509	1663	6536	1867	1338	1008	4307	3640	1489	1935	840	548	2420	1138	189	2005	577	923	892	1416	3227	1483	450	713	1410	2415	1945	1138	8029	2471	1091	3794	72731	0.203181	94.1497	47	2031.81	10.9886
mir-320	2230	3324	2514	1422	2418	2682	1835	2815	1994	1621	3255	5382	704	2183	2175	1084	1321	1933	1634	2297	1580	2172	1028	2019	1860	1267	869	1376	1464	2286	1308	1586	3840	1052	1996	1227	71753	0.200449	94.3502	48	2004.49	10.969
mir-302c	894	2558	1501	1104	2210	2642	1846	2299	1295	979	2640	5862	888	1790	3477	2151	1110	1817	587	2544	493	1159	1549	2024	1675	1228	885	1130	1586	2391	1223	2925	2578	829	1938	1334	65141	0.181978	94.5321	49	1819.78	10.8295
le7b	327	6530	1118	1258	994	1020	6501	1491	1149	1073	3089	2289	945	1824	622	165	1758	687	237	2090	869	686	424	1002	2781	1312	212	401	1102	2196	1646	708	8834	2174	600	2393	62507	0.174619	94.7068	50	1746.19	10.77
mir-423	1107	1658	1326	2330	1488	1770	2815	2445	1722	1511	3073	2542	748	1570	2278	1230	1576	1682	1636	1603	1450	965	1109	1691	2083	1430	849	2219	1593	2001	1142	2361	3301	878	1681	1060	61923	0.172988	94.8797	51	1729.88	10.7565
mir-101	779	2391	1015	1220	2492	2117	2032	1536	891	1351	3045	4319	496	1031	2450	2169	1251	2499	663	2178	444	1284	1283	2046	2186	1659	837	1153	1099	1997	573	2451	2026	817	1784	1081	58645	0.163831	95.0436	52	1638.31	10.678
mir-99b	515	1969	843	1551	973	813	3541	1206	1122	1656	2822	1913	698	1407	1232	919	1842	945	1177	1116	838	590	706	808	3127	2190	748	1103	974	1438	750	1158	2187	725	1848	860	48310	0.134959	95.1785	53	1349.59	10.3983
mir-7641-2	1275	933	1079	871	1396	1158	1332	1480	1180	2352	2084	543	670	1809	2388	820	1095	1149	2199	909	1649	624	980	1362	2159	1970	595	1704	859	1836	703	1563	1154	506	1759	809	46954	0.131171	95.3097	54	1311.71	10.3572
mir-25	699	1990	1498	795	1953	2179	1238	1571	878	842	2265	4501	451	1186	1526	1151	712	1395	496	1743	482	1334	829	1139	1233	870	590	732	1034	1473	791	1609	2676	862	1232	875	46830	0.130824	95.4405	55	1308.24	10.3534
mir-103	938	2655	1432	693	1753	1988	1124	1815	957	760	2448	5133	416	903	1206	842	617	1144	445	2155	435	1338	642	1102	1225	582	627	712	843	1312	617	1122	3020	770	946	743	45460	0.126997	95.5675	56	1269.97	10.3106
mir-7857-3p	865	1036	977	1215	1090	1991	1790	2156	1403	899	2031	2684	400	869	1211	712	1253	1033	776	1746	603	800	836	1368	1670	848	583	1468	1190	1754	669	1309	3669	999	838	666	45407	0.126849	95.6944	57	1268.49	10.3089
mir-7134-3p	644	1571	874	1510	1216	921	2755	1157	1047	1434	2333	2152	535	1097	1775	1270	1279	1370	811	1168	653	556	590	774	2266	1490	617	1123	774	1220	670	1496	1697	541	1477	674	43537	0.121625	95.816	58	1216.25	10.2482
mir-923p	308	1604	550	1342	551	580	6293	1459	1154	1019	2378	1857	310	534	887	468	1573	256	554	1390	701	294	328	333	3541	1151	323	768	1182	1297	457	897	4137	879	383	268	42006	0.117348	95.9334	59	1173.48	10.1966
mir-3715p	778	1664	1062	873	1453	2079	1060	2126	1009	682	1485	2183	500	1510	871	732	696	945	713	859	668	978	1265	1293	747	434	453	928	1032	1520	1013	1438	1930	812	799	838	39428	0.110146	96.0435	60	1101.46	10.1052
mir-378d	407	1755	1066	806	1840	1135	1115	841	782	1336	1834	2932	336	939	1714	1271	803	1359	401	1581	555	809	649	941	1423	1218	450	692	916	1893	496	1423	1175	481	1257	617	39248	0.109643	96.1531	61	1096.43	10.0986
mir-503	376	1076	698	644	1746	1715	1062	1058	626	874	1625	2723	348	795	1502	1122	638	1049	391	1449	467	1043	961	1299	1422	881	438	810	771	1476	540	1591	1413	535	890	598	36652	0.102391	96.2555	62	1023.91	9.99987
mir-26b	376	2050	874	574	1134	1819	1706	1386	664	441	1605	3312	354	844	709	453	639	615	136	1500	316	876	530	1043	1101	449	238	459	811	1397	584	940	3824	911	391	845	35906	0.100307	96.3558	63	1003.07	9.97021
ENSSSCG00000025162	426	357	446	1313	822	406	1192	467	638	2131	1831	130	834	1147	1399	830	865	1062	2070	295	1649	173	1319	414	2074	1565	1039	1494	988	1074	883	1535	404	191	1738	559	35760	0.0998991	96.4557	64	998.991	9.96433
mir-296-3p	556	1054	714	1345	680	920	1483	1288	1033	930	1667	1684	586	919	1262	848	1058	1120	701	854	696	418	689	967	1324	917	564	1189	1004	1122	808	1318	1603	416	1153	713	35603	0.0994605	96.5552	65	994.605	9.95798
mir-93	618	1557	1125	413	1490	1658	637	1359	780	489	1835	4296	314	757	908	613	401	751	269	1564	326	1084	462	964	780	378	423	562	642	975	498	1012	2041	563	498	523	33565	0.0937671	96.649	66	937.671	9.87294
mir-1246	1297	946	465	454	1156	1292	840	1760	768	1431	1458	388	853	1807	1044	345	1115	352	1321	396	1423	310	1350	511	1272	786	479	964	793	1113	610	1030	569	801	902	383	32784	0.0915853	96.7405	67	915.853	9.83897
mir-744	442	1465	559	698	661	618	1185	918	609	864	1627	2104	309	580	994	836	736	826	601	738	464	423	411	603	1187	803	464	762	687	794	408	1023	1487	371	926	416	28599	0.0798941	96.8204	68	798.941	9.64195
mir-1271	501	1147	761	541	1234	1151	755	946	538	545	1324	2546	276	652	1076	741	471	892	475	1015	271	835	566	784	799	518	436	555	590	872	405	1028	1395	511	783	529	28464	0.079517	96.9	69	795.17	9.63512
mir-371	344	1205	964	220	1958	639	218	1714	302	623	624	1302	145	1204	399	191	648	736	379	194	172	1247	1280	1679	688	127	142	884	1823	1611	739	1367	479	1075	278	837	28437	0.0794416	96.9794	70	794.416	9.63375
mir-185	358	1016	735	354	1271	1499	599	930	474	480	1621	2789	289	591	1052	827	459	931	177	1132	182	958	549	895	724	391	336	477	532	963	412	1046	1605	502	611	547	28314	0.079098	97.0585	71	790.98	9.6275
mir-186	336	1039	626	622	768	1274	1140	1039	545	472	1308	1641	334	663	628	322	506	680	191	1032	301	517	489	925	914	436	257	537	718	1186	572	789	2029	587	453	730	26606	0.0743265	97.1328	72	743.265	9.53773
mir-24-3p	125	2477	443	358	560	484	1543	465	313	443	1726	2353	335	470	453	217	526	555	109	1062	151	363	205	419	1261	648	140	185	472	651	468	434	2599	532	397	815	24757	0.0691611	97.202	73	691.611	9.43382
mir-28-3p	535	1140	491	450	786	827	772	854	521	519	989	1834	273	621	1266	528	370	963	618	772	304	473	339	669	785	546	318	497	440	652	354	749	866	257	790	409	23577	0.0658647	97.2679	74	658.647	9.36336
mir-3745p	437	893	774	336	1330	1177	489	886	454	434	1274	2784	207	488	743	602	244	646	120	982	230	612	391	593	586	314	323	296	380	614	272	717	1086	335	347	322	22718	0.063465	97.3313	75	634.65	9.30982
mir-27a	86	841	240	374	484	410	2126	410	316	342	1563	1569	422	550	274	163	901	537	39	831	118	290	267	492	1582	714	92	192	371	728	606	345	2016	455	275	832	21853	0.0610485	97.3924	76	610.485	9.25381
mir-140-3p	281	1094	433	424	891	803	785	613	353	431	902	1545	302	607	675	608	444	879	265	767	228	512	500	672	677	519	242	429	440	899	437	624	833	374	724	498	21710	0.060649	97.453	77	606.49	9.24434
mir-28-5p	545	870	539	382	763	677	592	617	471	543	1089	1734	184	452	945	453	346	875	418	860	200	554	258	681	674	485	262	528	333	662	240	827	921	290	629	332	21231	0.0593109	97.5123	78	593.109	9.21215
mir-1305p	365	580	395	1162	427	527	1136	675	520	527	840	555	254	446	1082	596	684	600	783	460	411	174	337	425	833	641	289	772	423	650	226	1012	881	331	706	346	21071	0.0588639	97.5712	79	588.639	9.20124
mir-10a	49	2031	233	442	380	274	2156	277	303	404	1061	708	333	601	209	131	971	265	64	462	225	169	231	292	1223	732	82	163	449	624	416	334	1769	601	311	776	19751	0.0551764	97.6264	80	551.764	9.10791
ENSSSCG00000027451	42	930	301	261	256	138	2352	491	349	438	1755	2698	97	208	350	188	360	65	7	1159	124	122	56	47	1468	403	93	136	647	947	102	298	1505	441	97	71	19002	0.053084	97.6794	81	530.84	9.05213
mir-484	516	436	540	424	576	921	411	875	474	257	825	1139	185	433	420	315	233	552	291	684	277	480	373	696	452	206	274	585	433	484	475	727	1431	291	355	370	18416	0.0514469	97.7309	82	514.469	9.00694
mir-106a	337	921	601	222	741	910	271	752	381	284	916	2648	136	344	503	338	167	439	134	894	175	716	242	488	399	157	237	313	372	478	186	666	1142	290	250	264	18314	0.051162	97.7821	83	511.62	8.99893
mir-2478	708	1086	247	189	550	442	543	379	230	222	1306	1571	180	172	1134	287	143	473	2434	546	570	455	249	866	504	270	116	311	137	321	146	487	387	86	338	126	18211	0.0508742	97.8329	84	508.742	8.99079
mir-125a	168	2259	488	290	440	417	1080	483	294	189	1057	1161	267	462	179	98	347	294	106	645	158	349	158	340	675	273	141	133	260	360	429	369	2444	509	219	616	18157	0.0507234	97.8837	85	507.234	8.98651
mir-6529a	345	789	291	633	251	318	1194	616	558	528	783	968	135	356	949	440	619	278	739	362	421	143	215	233	841	533	248	649	410	640	207	560	755	330	443	205	17985	0.0502429	97.9339	86	502.429	8.97278
mir-425-5p	220	742	399	403	580	788	547	636	395	302	750	1676	197	514	531	365	314	445	165	566	256	379	445	486	501	264	188	442	431	633	316	528	932	303	406	347	17392	0.0485863	97.9825	87	485.863	8.9244
mir-424-3p	336	249	377	590	604	678	645	731	517	440	760	831	187	432	708	267	282	407	386	584	387	438	239	427	598	355	208	673	376	626	286	817	982	286	421	245	17375	0.0485388	0.0485388	88	485.388	8.92299
mir-340	266	512	280	480	464	646	868	637	385	407	1007	1246	210	422	435	353	406	492	185	508	175	229	359	443	543	295	187	401	413	691	265	502	922	313	319	356	16622	0.0464352	0.094974	89	464.352	8.85907
mir-18a	273	561	461	195	654	788	222	527	277	271	742	1765	83	267	451	331	159	483	105	827	119	517	189	461	371	181	189	265	286	527	143	605	854	217	223	221	14810	0.0413732	0.136347	90	413.732	8.69255
mir-921-5p	349	393	252	532	430	561	638	686	511	260	645	802	177	431	650	158	328	256	331	322	344	266	200	390	350	302	153	519	306	411	277	532	770	246	254	254	14286	0.0399093	0.176257	91	399.093	8.64058
mir-1935p	375	929	594	223	515	453	298	516	301	298	575	1122	106	370	486	126	141	358	278	733	255	455	176	360	371	220	181	227	295	448	280	444	913	239	309	272	14242	0.0397864	0.216043	92	397.864	8.63613
mir-30e-3p	194	371	291	410	580	568	466	485	286	274	702	783	205	431	562	405	301	461	140	469	185	360	319	390	429	315	223	273	306	411	258	696	652	211	512	298	14222	0.0397306	0.255774	93	397.306	8.63411
mir-3607-3p	208	233	79	300	503	125	234	323	329	755	596	157	140	231	806	755	429	419	719	210	448	133	379	95	445	417	416	572	417	352	143	1047	176	128	934	164	13817	0.0385992	0.294373	94	385.992	8.59243
mir-3607-5p	102	266	72	464	155	84	56	164	93	651	191	328	193	62	178	1001	471	689	856	105	111	110	513	49	568	423	574	626	758	107	315	1287	157	483	869	353	13484	0.0376689	0.332042	95	376.689	8.55723
mir-330	333	745	306	315	405	490	523	389	296	282	587	955	152	368	611	405	277	368	357	340	240	211	221	296	446	226	186	303	260	363	217	504	559	170	353	182	13241	0.03699	0.369032	96	369.9	8.53099
le7c	53	987	195	281	186	192	2185	417	281	168	579	397	211	300	148	52	346	135	40	336	153	97	86	187	776	335	49	105	193	390	377	186	1266	388	108	440	12625	0.0352692	0.404301	97	352.692	8.46226
mir-7134-5p	192	578	293	377	305	320	727	423	292	289	497	641	131	375	434	322	275	241	229	320	250	144	208	222	458	287	197	323	324	377	167	339	478	148	346	169	11698	0.0326795	0.43698	98	326.795	8.35224
mir-96-5p	84	322	171	221	379	557	370	356	147	231	478	1207	147	251	282	267	323	339	59	300	81	187	438	447	348	230	102	269	295	490	174	413	635	217	248	275	11340	0.0316794	0.46866	99	316.794	8.3074
mir-210	133	571	237	181	406	449	330	321	168	195	555	1204	137	261	313	262	206	402	55	461	81	323	233	396	293	158	115	220	183	356	220	456	692	177	243	265	11258	0.0314503	0.50011	100	314.503	8.29693
mir-143-3p	4	40	9	37	14	64	1719	22	15	30	55	53	215	100	13	14	115	1405	13	27	4	8	57	250	1492	1781	7	13	16	35	418	14	156	47	964	1445	10671	0.0298105	0.529921	101	298.105	8.21968
mir-152	59	389	255	268	396	388	419	262	97	197	448	412	99	212	741	530	171	350	46	337	106	273	261	312	266	172	103	213	167	331	132	913	488	151	221	273	10458	0.0292155	0.559136	102	292.155	8.19059
le7d-5p	119	726	268	225	187	277	772	413	211	169	570	528	144	256	120	42	232	158	72	388	145	151	84	187	407	166	64	150	163	336	232	132	1483	346	95	331	10349	0.028911	0.588047	103	289.11	8.17547
mir-222	108	185	149	217	309	369	310	273	231	205	237	271	69	233	587	439	184	176	295	236	81	342	428	588	227	107	119	249	228	234	164	1149	641	140	323	220	10323	0.0288383	0.616885	104	288.383	8.17184
mir-140-5p	165	393	266	159	502	481	203	313	154	207	530	1044	91	211	264	171	131	382	48	495	76	426	189	409	254	151	119	189	188	377	168	412	552	153	206	206	10285	0.0287322	0.645617	105	287.322	8.16652
mir-449a	24	133	107	164	229	134	1099	412	275	288	605	716	39	77	69	62	423	35	6	267	38	63	65	75	561	140	65	115	425	654	104	116	2048	447	33	40	10153	0.0283634	0.673981	106	283.634	8.14789
mir-303p	50	507	154	326	172	88	1169	246	140	269	745	559	110	145	253	168	297	160	46	366	110	57	83	84	892	461	78	135	249	306	138	263	581	199	208	168	9982	0.0278857	0.701867	107	278.857	8.12338
mir-7641	172	190	174	104	243	162	231	220	169	627	307	107	130	289	645	242	252	232	571	130	261	113	166	217	486	518	147	384	157	300	115	372	147	66	490	126	9262	0.0258743	0.727741	108	258.743	8.01538
mir-1291	205	94	235	452	216	246	365	281	199	351	385	55	190	293	233	132	229	270	187	183	480	102	262	228	360	180	162	358	368	398	291	319	346	115	203	176	9149	0.0255586	0.753299	109	255.586	7.99767
mir-7857	215	312	257	188	324	365	292	399	210	214	401	749	66	146	254	149	177	217	115	455	127	265	145	250	336	151	116	189	207	372	115	241	613	160	193	134	9119	0.0254748	0.778774	110	254.748	7.99293
mir-339-5p	131	318	164	72	388	524	111	340	127	77	475	1638	80	131	140	99	65	335	32	425	21	330	181	493	154	89	78	109	103	215	178	215	639	115	133	217	8942	0.0249804	0.803755	111	249.804	7.96465
mir-375	49	336	127	195	193	133	870	225	210	337	594	578	53	99	382	188	336	116	66	287	86	127	65	115	565	223	84	144	238	335	98	258	721	175	132	73	8813	0.02462	0.828375	112	246.2	7.94369
mir-3785p	103	254	190	149	394	468	166	368	181	132	419	904	139	232	267	170	148	242	54	280	85	237	196	337	157	114	110	215	214	272	168	363	531	152	183	202	8796	0.0245725	0.852947	113	245.725	7.9409
mir-343p	10	392	113	108	136	64	983	273	201	250	832	1142	65	144	181	102	242	33	3	426	65	57	37	23	769	200	71	54	266	474	74	124	526	205	82	41	8768	0.0244943	0.877441	114	244.943	7.9363
mir-499-5p	142	318	348	175	396	524	271	393	220	101	352	737	103	252	247	142	135	332	54	376	63	277	134	309	181	110	119	192	132	215	130	286	476	146	180	181	8749	0.0244412	0.901883	115	244.412	7.93317
mir-455-5p	65	688	224	349	219	355	480	219	204	125	478	665	49	168	379	257	224	164	90	189	144	100	151	196	336	210	77	106	216	342	69	358	205	124	133	100	8458	0.0236283	0.925511	116	236.283	7.88437
mir-32	100	280	137	93	326	207	227	194	100	186	501	1480	48	107	249	173	122	312	68	412	32	161	166	348	356	239	81	123	121	255	76	290	416	103	152	79	8320	0.0232427	0.948754	117	232.427	7.86064
mir-181a	25	1253	122	133	199	169	500	120	71	159	494	448	161	214	108	45	227	166	32	222	54	93	95	143	370	187	34	67	158	257	196	160	764	222	129	371	8168	0.0228181	0.971572	118	228.181	7.83404
mir-29a	16	286	157	167	261	275	655	146	97	105	426	626	91	90	152	127	173	233	5	344	38	145	144	287	465	177	42	91	173	292	157	223	683	161	116	231	7857	0.0219493	0.993521	119	219.493	7.77803
mir-9	14	211	79	223	54	45	866	110	86	344	710	508	49	57	92	101	506	42	7	290	43	27	25	31	602	299	43	63	262	430	33	111	977	319	40	55	7754	0.0216616	1.01518	120	216.616	7.75899
mir-302e	148	341	242	129	337	270	207	265	182	136	355	607	63	190	445	181	94	247	112	316	62	168	101	199	210	130	132	159	170	224	105	385	303	89	232	133	7669	0.0214241	1.03661	121	214.241	7.74309
mir-125b	50	783	135	112	154	103	861	157	108	98	397	458	117	175	82	44	106	169	34	297	51	101	36	124	598	266	49	55	105	156	241	141	781	144	83	247	7618	0.0212816	1.05789	122	212.816	7.73347
mir-361-3p	86	292	119	249	286	233	383	240	175	233	372	392	168	216	377	292	225	292	97	87	56	93	199	164	193	166	86	164	112	130	118	246	182	58	256	150	7187	0.0200776	1.07797	123	200.776	7.64944
le7e	37	751	128	128	116	122	594	177	114	113	380	223	131	194	58	28	223	63	29	219	80	103	62	99	272	143	26	56	127	265	159	85	888	201	76	253	6723	0.0187814	1.09675	124	187.814	7.55316
mir-335-3p	133	105	149	166	134	246	199	183	130	190	339	345	84	104	179	188	189	244	130	163	78	93	134	193	174	152	95	209	142	192	89	280	389	122	171	81	6194	0.0173035	1.11405	125	173.035	7.43492
mir-19a	75	212	175	99	260	426	133	205	104	86	266	528	64	155	108	106	60	221	30	245	61	233	144	317	129	69	59	116	133	232	141	245	354	114	98	136	6139	0.0171499	1.1312	126	171.499	7.42206
mir-1343	158	329	163	180	133	171	216	214	133	136	286	381	67	108	163	115	126	167	152	193	146	95	120	107	228	150	129	175	135	139	96	217	452	74	167	69	6090	0.017013	1.14821	127	170.13	7.4105
mir-23b	19	546	113	58	190	223	307	172	92	58	357	711	95	160	61	31	109	51	10	241	35	141	62	118	185	57	32	43	95	267	167	74	651	180	64	261	6036	0.0168622	1.16508	128	168.622	7.39765
mir-421-3p	182	259	242	97	247	292	152	331	151	111	349	627	42	114	158	79	83	104	62	267	90	153	60	125	115	51	66	121	101	203	87	135	423	95	86	90	5950	0.0166219	1.1817	129	166.219	7.37694
mir-107	109	336	194	92	217	265	160	259	107	97	304	944	59	108	87	71	80	83	46	298	45	115	95	133	138	46	49	107	110	194	75	104	483	118	56	94	5878	0.0164208	1.19812	130	164.208	7.35938
mir-3743p	50	106	100	152	262	370	215	250	133	111	293	438	77	141	186	163	116	174	53	133	43	98	165	210	168	89	55	135	124	175	89	204	248	104	110	101	5641	0.0157587	1.21388	131	157.587	7.3
mir-149	70	216	120	101	207	248	156	165	112	135	267	376	55	167	296	172	73	147	76	174	77	143	131	169	147	106	77	147	186	214	76	243	227	81	159	110	5626	0.0157168	1.22959	132	157.168	7.29616
mir-93-5p	112	285	179	86	253	231	109	239	118	84	328	695	47	130	156	104	66	127	44	226	55	179	95	144	135	67	76	86	125	153	81	171	340	101	94	100	5621	0.0157028	1.2453	133	157.028	7.29488
mir-1063p	83	208	175	112	242	209	169	201	128	148	270	396	73	160	212	143	110	160	64	240	60	144	124	131	152	113	61	109	132	198	89	150	228	86	166	117	5563	0.0155408	1.26084	134	155.408	7.27992
mir-378e	38	193	91	156	244	181	190	164	136	126	259	368	66	121	266	206	144	177	85	133	84	89	149	153	160	123	82	139	98	195	80	223	207	88	192	143	5549	0.0155017	1.27634	135	155.017	7.27628
mir-1	48	420	80	88	285	310	291	173	71	98	228	337	45	142	407	291	127	136	34	107	46	105	151	156	155	58	44	72	131	144	46	201	195	76	75	74	5447	0.0152167	1.29156	136	152.167	7.24951
mir-378g	51	187	87	152	191	161	238	133	123	116	281	382	76	138	235	182	147	189	61	121	76	85	127	138	187	115	88	127	120	179	95	233	183	93	178	100	5375	0.0150156	1.30657	137	150.156	7.23032
mir-769-5p	48	137	72	178	169	217	301	167	112	120	300	242	74	129	195	128	177	164	67	120	58	78	126	145	218	150	70	146	94	199	104	171	273	102	156	128	5335	0.0149038	1.32148	138	149.038	7.21954
mir-16	65	223	189	78	245	248	140	208	113	100	224	641	38	140	140	98	72	162	37	218	46	179	67	164	104	51	52	96	113	167	66	165	382	98	81	90	5300	0.0148061	1.33628	139	148.061	7.21005
mir-19b	104	245	143	50	256	287	60	184	74	56	272	752	31	107	130	107	41	171	32	271	32	263	81	175	98	56	57	70	95	115	55	201	325	91	75	72	5234	0.0146217	1.3509	140	146.217	7.19197
mir-361-5p	102	468	177	100	210	286	154	248	107	80	303	440	51	148	164	57	62	135	25	177	36	140	49	140	115	50	42	53	81	108	91	99	473	87	51	117	5226	0.0145993	1.3655	141	145.993	7.18976
mir-4505p	54	121	96	104	193	179	158	150	104	176	342	477	55	119	258	187	126	179	38	115	40	69	84	97	136	98	73	96	117	216	69	181	173	70	111	79	4940	0.0138004	1.3793	142	138.004	7.10856
mir-203a	36	118	77	125	168	202	227	138	92	114	237	236	92	150	210	140	151	156	46	116	62	98	167	159	173	84	53	135	121	228	95	158	212	108	141	104	4929	0.0137696	1.39307	143	137.696	7.10535
mir-378f	53	184	101	133	193	145	159	143	114	134	214	316	64	135	239	171	103	150	70	106	79	76	125	125	144	118	56	147	90	154	65	208	170	73	176	107	4840	0.013521	1.40659	144	135.21	7.07906
mir-7142-3p	59	140	106	129	211	134	203	116	84	127	255	317	55	118	239	172	117	176	62	142	55	93	81	103	189	123	68	112	106	121	61	189	202	64	201	92	4822	0.0134707	1.42006	145	134.707	7.07368
mir-205	36	404	96	64	91	75	182	135	64	47	292	397	122	163	59	16	93	102	32	175	36	68	34	69	185	75	36	37	60	115	151	71	547	129	65	270	4593	0.012831	1.4329	146	128.31	7.00349
mir-196a	72	143	183	113	209	182	127	228	222	94	262	265	30	138	79	82	52	65	68	282	107	128	57	127	167	80	131	164	70	164	58	102	102	68	100	70	4591	0.0128254	1.44572	147	128.254	7.00286
mir-204	11	203	45	113	31	34	657	74	82	96	227	160	103	148	66	36	210	50	7	136	38	12	16	18	341	164	24	42	134	193	132	61	533	164	66	122	4549	0.0127081	1.45843	148	127.081	6.9896
mir-1485p	43	127	41	116	189	197	193	173	113	91	234	356	84	97	141	95	125	87	63	75	32	68	155	160	123	112	57	206	113	154	69	166	203	40	117	85	4500	0.0125712	1.471	149	125.712	6.97398
mir-34b	4	88	47	126	39	32	835	99	85	97	328	367	24	22	61	45	169	15	5	225	21	9	28	22	474	156	12	42	110	189	38	75	323	78	19	19	4328	0.0120907	1.48309	150	120.907	6.91775
mir-424-5p	45	123	117	39	246	246	51	136	63	75	199	557	28	47	113	93	35	108	18	272	25	173	77	190	141	64	49	55	78	126	41	153	222	67	65	52	4189	0.0117024	1.49479	151	117.024	6.87066
ENSSSCG00000018952	71	128	90	78	147	139	151	160	81	119	187	251	61	101	213	114	50	132	67	135	35	89	46	93	150	139	79	113	94	137	63	191	152	38	203	79	4176	0.0116661	1.50646	152	116.661	6.86617
mir-98	54	299	115	98	80	110	282	170	107	49	262	254	64	129	73	29	100	74	14	138	47	56	40	72	144	45	20	47	75	148	100	61	475	124	51	144	4150	0.0115934	1.51805	153	115.934	6.85716
mir-7-5p	25	66	51	170	92	213	247	229	140	52	149	131	67	134	68	69	129	64	37	75	73	33	187	87	111	54	45	141	118	209	119	104	214	149	86	106	4044	0.0112973	1.52935	154	112.973	6.81984
ENSSSCG00000020115	100	196	187	117	170	168	128	179	100	107	295	301	48	116	77	95	89	70	29	163	20	95	89	95	120	44	40	52	61	104	38	78	107	36	103	47	3864	0.0107945	1.54014	155	107.945	6.75415
mir-1306-3p	61	204	76	121	116	63	169	138	86	104	228	219	32	103	159	90	80	88	162	89	65	44	73	83	153	153	55	96	69	90	54	118	138	47	143	46	3815	0.0106576	1.5508	156	106.576	6.73574
mir-221-3p	23	285	81	34	160	204	93	155	46	37	127	256	30	75	81	34	41	56	17	152	18	140	99	178	63	25	38	45	83	144	60	128	469	102	38	86	3703	0.0103447	1.56115	157	103.447	6.69275
mir-25-5p	143	114	117	120	97	158	134	208	130	63	165	195	45	101	109	49	66	68	82	110	78	61	61	93	90	41	60	94	109	92	76	124	213	77	58	42	3643	0.0101771	1.57132	158	101.771	6.66918
mir-106b	63	125	101	51	147	205	69	129	81	47	158	538	32	56	85	67	43	104	23	189	24	116	73	137	69	45	45	53	94	115	51	103	228	56	47	58	3627	0.0101324	1.58146	159	101.324	6.66283
mir-9-1	9	162	67	55	46	33	254	53	43	106	384	422	18	19	54	39	117	9	9	171	14	33	9	21	186	80	11	28	123	153	13	44	605	127	18	25	3560	0.00994521	1.5914	160	99.4521	6.63593
mir-2320-3p	87	115	53	137	56	41	204	110	115	118	152	127	39	64	167	72	122	78	187	72	81	33	35	42	158	143	60	150	70	100	41	92	107	48	170	38	3484	0.0097329	1.60113	161	97.329	6.6048
mir-184	10	132	40	108	51	31	178	58	74	105	266	75	13	193	108	211	91	26	10	90	79	11	32	9	210	32	58	50	82	228	13	346	76	47	262	25	3430	0.00958204	1.61072	162	95.8204	6.58226
mir-1307-5p	30	43	36	75	84	111	130	67	50	107	146	172	73	70	108	100	86	182	25	98	18	44	102	138	148	135	33	83	87	157	78	133	142	53	127	95	3366	0.00940325	1.62012	163	94.0325	6.55509
mir-3653-3p	44	45	31	100	91	35	138	41	56	139	146	15	74	125	199	129	98	137	163	46	101	22	73	33	199	205	66	113	57	65	50	132	29	31	231	57	3316	0.00926357	1.62938	164	92.6357	6.5335
mir-100	9	101	34	58	76	64	464	50	49	88	115	93	79	98	42	45	121	92	13	72	18	43	50	54	324	210	18	24	43	95	114	46	153	30	80	102	3167	0.00884733	1.63823	165	88.4733	6.46717
mir-4335	105	601	65	158	88	90	88	53	31	31	158	245	48	61	49	21	9	53	224	99	104	90	65	72	81	26	18	32	41	72	43	41	59	14	89	39	3163	0.00883615	1.64707	166	88.3615	6.46535
mir-5100	56	310	80	62	91	79	228	38	40	49	207	181	40	43	52	30	19	42	206	191	96	97	72	50	162	69	20	38	62	104	38	61	62	10	43	18	3046	0.0085093	1.65558	167	85.093	6.41097
mir-1306-5p	99	217	93	43	107	101	57	117	79	57	135	270	31	58	100	60	27	80	51	144	57	85	50	65	73	36	58	48	64	61	38	92	173	24	53	35	2938	0.00820759	1.66378	168	82.0759	6.35889
mir-146b	12	76	13	50	47	37	601	96	66	114	96	75	19	36	72	44	94	21	10	60	26	10	20	15	344	161	28	54	111	130	29	51	168	66	25	15	2892	0.00807909	1.67186	169	80.7909	6.33612
ENSSSCG00000026244	133	169	123	80	97	136	126	189	104	49	200	154	35	73	67	52	51	61	50	131	23	97	29	63	65	27	25	36	36	56	22	54	78	29	65	34	2819	0.00787515	1.67974	170	78.7515	6.29924
ENSSSCG00000018677	46	88	84	40	85	159	82	112	54	41	177	387	19	54	91	55	41	46	26	99	26	41	40	86	70	21	47	65	57	109	47	78	214	40	27	41	2795	0.00780811	1.68755	171	78.0811	6.2869
mir-362	40	99	90	60	106	107	67	105	43	44	165	279	15	57	64	55	38	57	20	153	37	79	55	96	84	49	31	59	72	103	45	94	169	47	58	49	2791	0.00779693	1.69534	172	77.9693	6.28483
mir-23a	2	151	41	14	55	90	132	91	30	29	252	459	27	49	30	13	44	26	3	134	11	79	22	30	109	20	13	9	42	121	60	29	280	84	23	89	2693	0.00752316	1.70287	173	75.2316	6.23327
mir-151-5p	45	158	56	39	132	125	120	76	43	56	99	205	30	67	87	81	32	93	32	113	29	71	53	58	101	69	38	40	49	92	41	93	124	32	76	37	2692	0.00752037	1.71039	174	75.2037	6.23273
mir-192	21	47	37	67	83	64	485	50	40	51	150	82	23	48	89	64	113	36	25	44	16	36	42	37	271	85	36	53	58	97	11	76	105	54	59	14	2669	0.00745611	1.71784	175	74.5611	6.22035
mir-505	42	92	85	48	95	164	88	128	67	32	133	181	33	50	72	54	39	65	19	76	30	83	58	88	57	25	28	56	51	87	43	81	204	49	55	55	2613	0.00729967	1.72514	176	72.9967	6.18976
mir-103p	10	181	38	54	55	73	193	46	53	50	155	144	43	68	63	31	70	50	14	79	25	46	34	57	101	50	14	27	47	98	65	66	224	72	46	76	2518	0.00703428	1.73218	177	70.3428	6.13633
mir-22-5p	29	106	61	39	94	140	72	82	39	31	97	254	29	56	42	27	48	63	14	91	20	75	62	77	55	35	24	46	56	85	45	80	180	41	38	54	2387	0.00666832	1.73884	178	66.6832	6.05925
ENSSSCG00000020534	89	87	120	58	118	128	66	116	47	51	202	154	14	62	46	37	27	50	34	114	14	87	46	81	70	32	20	36	37	59	14	58	73	34	53	32	2366	0.00660965	1.74545	179	66.0965	6.0465
mir-367	44	87	75	33	85	94	26	63	33	24	70	274	22	38	92	61	19	139	19	178	15	70	27	115	63	43	29	35	56	84	19	73	115	33	65	23	2341	0.00653981	1.75199	180	65.3981	6.03118
mir-500	23	85	62	38	108	98	53	77	58	38	90	212	26	29	54	58	51	46	10	98	23	65	62	75	56	39	38	49	41	84	27	52	142	42	62	50	2221	0.00620458	1.7582	181	62.0458	5.95526
mir-1249	63	190	34	24	65	62	79	69	36	37	115	171	15	63	85	67	29	30	30	70	35	47	43	39	63	38	34	31	102	66	47	106	128	27	30	19	2189	0.00611519	1.76431	182	61.1519	5.93432
mir-660-5p	34	49	56	41	97	105	43	66	32	37	132	235	21	28	53	50	44	50	4	144	14	46	51	96	62	45	18	37	44	76	24	83	152	37	36	42	2184	0.00610122	1.77042	183	61.0122	5.93103
mir-1248	44	44	57	54	75	67	57	102	54	62	88	29	36	80	53	38	40	36	51	64	71	32	53	87	86	60	29	77	68	82	50	75	80	37	50	58	2126	0.00593919	1.77635	184	59.3919	5.89219
mir-6782	29	120	111	95	25	31	140	53	42	67	59	96	13	41	43	21	74	51	32	109	63	11	23	25	120	129	26	44	75	50	20	35	87	40	48	26	2074	0.00579392	1.78215	185	57.9392	5.85647
mir-150	10	79	21	18	30	14	434	61	64	51	70	84	10	29	74	36	42	14	7	78	14	15	13	11	303	74	15	17	65	81	24	35	128	26	7	17	2071	0.00578554	1.78793	186	57.8554	5.85438
mir-365-3p	18	81	60	11	74	149	43	104	48	30	88	198	7	62	36	21	21	17	9	112	21	75	28	60	25	9	26	27	84	98	41	34	214	64	26	25	2046	0.0057157	1.79365	187	57.157	5.83686
mir-126-3p	22	190	38	33	95	63	79	51	29	25	71	147	34	59	31	43	34	81	17	71	12	57	29	66	70	58	30	19	40	60	33	52	111	37	75	67	2029	0.00566821	1.79932	188	56.6821	5.82482
mir-590-3p	24	36	44	30	79	134	59	57	28	18	101	203	21	45	41	18	28	61	11	94	14	49	40	134	47	40	18	40	57	78	25	51	151	45	32	51	2004	0.00559837	1.80492	189	55.9837	5.80694
mir-15b	45	99	78	26	83	68	21	68	36	29	83	331	12	49	58	47	22	54	17	91	13	75	23	53	36	18	19	23	43	72	15	64	121	29	29	28	1978	0.00552574	1.81044	190	55.2574	5.7881
mir-141	10	93	28	23	60	42	130	31	24	27	126	201	33	36	24	16	43	60	1	133	11	37	24	64	113	50	10	11	39	57	42	30	206	44	26	67	1972	0.00550898	1.81595	191	55.0898	5.78371
mir-451	1	0	1	5	2	23	29	1	2	4	1	3	32	8	2	0	2	622	1	0	1	3	13	45	11	10	2	2	14	8	108	0	9	1	315	642	1923	0.00537209	1.82132	192	53.7209	5.74741
mir-381	16	40	21	65	50	64	222	43	37	50	112	101	27	38	16	54	62	48	35	34	8	15	38	22	158	79	17	23	46	73	19	39	25	23	76	66	1862	0.00520168	1.82652	193	52.0168	5.70091
mir-378i	20	43	32	60	62	62	77	53	58	46	83	116	33	60	70	38	43	53	27	31	27	32	44	57	71	39	20	48	38	88	46	79	79	35	49	40	1859	0.0051933	1.83172	194	51.933	5.69858
mir-7-2	26	12	25	48	109	62	58	45	44	63	127	137	20	67	72	50	58	45	23	42	18	72	50	53	67	52	26	67	34	52	16	42	49	24	70	24	1849	0.00516536	1.83688	195	51.6536	5.6908
mir-3607	40	29	16	36	79	26	48	51	52	83	77	26	11	34	114	82	30	32	89	32	66	15	50	20	65	50	49	67	49	73	13	143	43	21	112	21	1844	0.0051514	1.84203	196	51.514	5.68689
mir-6782-3p	29	183	52	22	40	104	45	88	51	33	82	122	25	63	52	30	21	46	16	70	34	33	33	83	38	19	26	33	40	40	35	66	56	25	53	49	1837	0.00513184	1.84717	197	51.3184	5.6814
mir-652	38	69	42	26	64	58	53	67	47	24	130	126	17	36	81	44	41	30	3	62	6	23	33	70	64	23	38	26	35	49	27	83	153	32	58	27	1805	0.00504245	1.85221	198	50.4245	5.65605
ENSSSCG00000024853	14	60	33	71	60	24	92	21	21	102	70	35	32	79	78	35	94	87	23	27	58	18	27	16	95	61	13	30	29	61	42	24	43	26	132	43	1776	0.00496143	1.85717	199	49.6143	5.63268
mir-1434-5p	41	47	39	61	39	39	54	56	19	78	73	25	35	44	68	48	32	56	54	35	48	21	33	31	106	97	36	52	45	51	22	83	56	10	76	26	1736	0.00484969	1.86202	200	48.4969	5.59982
mir-363	12	36	44	22	96	59	29	37	33	28	130	41	20	24	34	44	27	31	12	100	13	84	67	29	68	14	24	32	47	66	11	92	34	51	72	20	1583	0.00442227	1.86644	201	44.2227	5.46671
mir-3015p	29	46	25	37	76	84	47	77	28	26	76	179	11	24	53	25	23	37	9	74	12	23	32	66	42	24	23	34	33	42	21	65	77	45	27	26	1578	0.0044083	1.87085	202	44.083	5.46215
ENSSSCG00000026843	46	71	35	27	55	34	43	46	57	38	97	122	12	51	72	48	27	59	54	33	40	26	20	40	54	34	34	18	29	28	17	73	62	18	30	19	1569	0.00438316	1.87523	203	43.8316	5.4539
mir-1298	13	165	53	66	70	9	21	55	49	117	46	174	16	37	70	92	37	93	20	48	0	14	11	13	28	38	0	35	7	33	8	15	11	26	57	18	1565	0.00437198	1.87961	204	43.7198	5.45022
mir-676-3p	49	55	52	52	53	45	98	58	65	23	108	52	32	64	24	33	62	24	14	26	8	19	20	26	67	24	19	20	16	44	19	22	110	29	32	45	1509	0.00421554	1.88382	205	42.1554	5.39765
mir-3023p	25	83	33	33	62	58	35	64	36	18	61	149	21	33	61	43	17	31	8	62	13	23	25	32	49	22	22	31	27	46	20	59	67	21	40	26	1456	0.00406748	1.88789	206	40.6748	5.34606
mir-130a	28	80	69	28	62	53	40	49	26	54	42	124	15	40	55	45	15	29	25	73	17	27	15	30	31	26	7	21	33	53	23	59	72	8	40	13	1427	0.00398647	1.89188	207	39.8647	5.31704
ENSSSCG00000021117	3	7	12	29	88	114	19	62	29	29	59	11	58	102	30	14	8	29	7	21	19	45	73	47	19	7	25	13	25	87	80	46	37	18	46	75	1393	0.00389148	1.89577	208	38.9148	5.28225
mir-190b	8	79	26	23	9	9	178	37	30	29	89	103	1	8	18	7	38	1	2	112	9	5	3	3	108	32	8	5	31	52	8	10	188	45	3	3	1320	0.00368755	1.89945	209	36.8755	5.20459
mir-4331	25	29	28	38	63	36	33	45	25	50	71	70	7	40	56	46	22	45	28	30	14	35	23	42	31	48	24	33	23	40	23	54	56	13	55	16	1317	0.00367917	1.90313	210	36.7917	5.20131
mir-2424	24	3	36	39	89	113	50	19	5	15	102	18	35	18	11	29	29	10	31	18	62	14	78	3	22	7	34	50	43	47	57	74	41	22	38	31	1317	0.00367917	1.90681	210	36.7917	5.20131
mir-31	1	143	34	12	31	37	38	26	15	14	80	122	5	19	1	2	17	14	2	59	7	29	18	32	29	18	7	5	13	23	20	13	242	21	7	47	1203	0.0033607	1.91017	212	33.607	5.07069
mir-128-1	5	37	17	42	28	44	60	19	17	38	37	35	21	34	81	43	35	33	22	10	26	18	20	31	33	29	7	23	27	49	26	95	46	17	56	28	1189	0.00332159	1.91349	213	33.2159	5.0538
mir-6087	21	24	20	21	42	22	44	24	30	54	50	19	22	46	58	18	24	51	58	16	53	8	46	32	49	52	33	39	31	37	32	35	13	7	41	6	1178	0.00329086	1.91679	214	32.9086	5.04039
mir-30d-5p	14	35	17	47	32	44	64	35	25	28	39	43	16	31	31	33	37	23	14	27	16	20	52	45	39	25	17	32	24	61	26	41	66	21	35	21	1176	0.00328527	1.92007	215	32.8527	5.03794
mir-219a	21	21	11	33	42	33	31	35	38	15	60	58	23	58	57	42	24	44	51	15	15	11	24	25	40	35	21	37	9	8	32	50	21	5	75	20	1140	0.0031847	1.92326	216	31.847	4.99309
ENSSSCG00000028255	28	33	26	31	20	21	28	17	27	62	73	9	23	54	37	21	20	28	60	29	46	10	23	20	51	37	33	26	33	29	20	34	21	12	66	24	1132	0.00316235	1.92642	217	31.6235	4.98293
mir-1468	8	83	16	39	14	5	176	16	19	20	69	13	11	18	17	6	28	16	6	26	5	14	4	12	132	78	6	6	26	20	13	14	93	36	30	35	1130	0.00315677	1.92957	218	31.5677	4.98038
mir-4497	28	24	12	40	25	19	80	4	12	95	39	9	15	44	103	52	43	19	36	10	16	4	14	8	74	72	14	38	17	25	13	36	6	10	43	15	1114	0.00311207	1.93269	219	31.1207	4.9598
mir-365-5p	39	49	24	24	11	14	52	44	31	23	41	65	14	19	79	20	31	18	73	21	31	10	14	13	31	25	17	33	22	31	21	41	50	13	25	19	1088	0.00303944	1.93573	220	30.3944	4.92573
mir-449b	0	12	10	18	23	15	115	36	24	22	63	59	4	9	14	9	35	7	0	24	6	10	6	9	52	17	4	11	40	80	10	12	226	52	5	4	1043	0.00291372	1.93864	221	29.1372	4.86479
mir-3178	31	13	67	33	15	11	22	6	19	34	65	32	9	34	10	4	28	110	20	44	61	11	8	11	28	15	14	13	16	21	21	18	56	14	43	41	998	0.00278801	1.94143	222	27.8801	4.80116
mir-185-3p	15	25	14	25	28	50	37	47	42	14	59	42	24	36	53	31	24	32	18	11	17	12	30	29	28	17	13	17	20	27	26	45	24	14	28	20	994	0.00277684	1.9442	223	27.7684	4.79537
le73p	8	37	9	32	20	23	73	21	9	21	81	50	20	25	9	2	39	17	2	25	7	13	7	21	65	37	5	20	23	36	25	18	107	25	13	32	977	0.00272935	1.94693	224	27.2935	4.77048
mir-183p	21	31	44	17	38	53	12	54	18	12	42	89	4	21	27	22	17	35	12	38	13	45	18	36	17	10	11	18	18	21	10	35	48	8	14	19	948	0.00264833	1.94958	225	26.4833	4.72701
mir-190a	15	43	33	13	48	66	18	44	18	14	31	84	7	22	31	22	6	26	1	41	2	49	11	34	16	4	8	12	31	30	10	34	53	8	10	13	908	0.00253659	1.95212	226	25.3659	4.66482
mir-153p	23	18	24	9	20	32	3	49	19	23	32	115	4	17	27	15	14	11	4	49	3	48	16	43	10	5	15	15	21	29	6	24	90	14	10	12	869	0.00242764	1.95455	227	24.2764	4.60148
mir-129b	11	38	7	27	24	24	34	17	11	30	29	46	10	18	37	43	29	27	9	26	17	9	28	11	32	17	20	16	15	31	11	20	19	14	48	22	827	0.00231031	1.95686	228	23.1031	4.53001
mir-993p	14	34	16	22	30	14	33	21	24	29	52	49	12	29	27	21	22	14	13	21	13	22	13	17	40	26	19	25	12	20	5	26	12	7	45	11	810	0.00226281	1.95912	229	22.6281	4.50005
mir-455	11	96	31	21	18	19	23	22	27	10	60	92	3	12	39	31	12	10	7	16	14	9	8	11	32	19	16	3	20	27	3	31	17	13	13	4	800	0.00223488	1.96135	230	22.3488	4.48212
mir-29b	8	29	12	9	26	33	33	22	18	4	53	72	4	13	10	14	16	19	9	27	9	26	27	24	32	7	9	12	11	40	12	24	39	17	18	16	754	0.00210637	1.96346	231	21.0637	4.39669
ENSSSCG00000025302	30	48	52	22	34	28	16	44	25	12	48	34	3	25	16	7	9	10	8	32	8	29	11	19	15	4	9	7	13	19	5	20	33	10	15	9	729	0.00203653	1.9655	232	20.3653	4.34804
mir-181d-5p	2	48	13	16	6	11	68	27	16	12	42	46	15	19	8	6	18	5	1	39	2	6	6	5	50	17	4	6	21	32	10	10	99	19	9	14	728	0.00203374	1.96753	233	20.3374	4.34606
mir-455-3p	12	104	50	12	20	45	17	29	11	5	43	91	4	16	5	17	10	13	1	9	11	23	14	11	12	5	6	12	24	21	3	16	24	6	6	8	716	0.00200022	1.96953	234	20.0022	4.32208
mir-330-5p	10	15	6	13	23	24	24	21	12	11	41	58	14	12	32	12	17	30	4	13	5	16	15	37	33	10	8	7	5	30	21	25	26	15	16	21	682	0.00190523	1.97144	235	19.0523	4.2519
mir-101-2	9	34	7	9	20	29	20	17	8	15	36	71	1	17	24	22	15	37	3	21	5	18	7	29	21	30	10	9	15	20	4	26	24	12	20	11	676	0.00188847	1.97333	236	18.8847	4.23915
mir-32-3p	11	20	12	9	29	40	21	27	9	12	23	49	7	19	23	18	22	12	7	25	8	16	16	18	18	15	9	7	10	20	12	17	59	19	16	12	667	0.00186333	1.97519	237	18.6333	4.21981
mir-345-3p	7	31	6	19	10	13	42	21	32	9	48	58	9	12	27	14	11	19	14	20	5	1	11	7	26	15	4	16	9	16	8	18	49	14	10	19	650	0.00181584	1.977	238	18.1584	4.18256
mir-4334-3p	2	21	10	5	11	18	46	5	3	12	53	31	11	11	9	5	24	41	1	25	0	7	11	32	20	12	5	8	11	26	18	11	50	16	10	58	639	0.00178511	1.97879	239	17.8511	4.15794
mir-425-3p	18	14	10	13	11	22	22	19	18	12	31	55	4	14	23	29	4	11	8	32	5	9	21	15	25	14	7	18	7	25	10	21	36	2	13	13	611	0.00170689	1.9805	240	17.0689	4.0933
mir-139-5p	0	15	5	12	7	5	65	20	13	6	43	68	8	8	14	7	50	3	5	12	4	0	3	4	35	16	9	9	13	19	4	6	86	21	1	3	599	0.00167337	1.98217	241	16.7337	4.06468
mir-339-1	14	11	9	14	27	32	13	23	17	10	50	71	6	11	28	12	13	10	12	6	0	33	16	31	11	9	8	29	9	10	10	16	6	1	13	4	595	0.00166219	1.98383	242	16.6219	4.05501
mir-233p	0	70	12	5	17	19	36	20	11	9	29	36	14	24	1	2	15	6	1	17	1	9	6	12	27	7	2	2	9	16	21	4	67	21	6	30	584	0.00163146	1.98546	243	16.3146	4.02809
mir-30e	11	15	11	18	37	45	15	30	6	7	28	30	6	29	13	14	10	9	2	11	16	7	15	13	20	6	7	11	11	14	13	27	21	13	15	9	565	0.00157838	1.98704	244	15.7838	3.98038
mir-135	2	25	11	13	2	6	54	9	9	14	32	67	5	1	9	6	10	5	0	38	4	0	5	5	47	19	2	3	10	26	9	14	73	8	1	6	550	0.00153648	1.98858	245	15.3648	3.94156
mir-128-2	7	8	6	33	8	18	30	7	8	14	12	14	13	24	26	25	12	11	14	2	19	4	20	9	11	17	9	9	12	19	19	36	15	11	31	16	549	0.00153369	1.99011	246	15.3369	3.93893
mir-148b	2	8	9	8	39	29	9	17	9	16	43	54	12	13	11	8	15	11	4	15	2	16	15	17	10	4	17	31	16	13	6	18	1	6	25	8	537	0.00150016	1.99161	247	15.0016	3.90705
mir-292	9	23	10	2	27	32	18	9	3	15	27	75	1	11	19	9	10	14	2	26	3	17	9	13	24	11	2	13	7	27	5	17	19	4	6	14	533	0.00148899	1.9931	248	14.8899	3.89626
mir-1277-5p	6	17	11	4	29	17	8	12	10	15	16	58	2	14	27	15	6	20	2	35	1	18	8	23	14	12	7	4	7	18	5	32	43	4	7	5	532	0.00148619	1.99459	249	14.8619	3.89355
mir-127	8	20	29	18	27	21	25	18	20	19	21	10	10	15	8	7	11	10	14	7	2	7	16	9	36	4	10	15	6	23	10	12	17	9	17	20	531	0.0014834	1.99607	250	14.834	3.89084
le7d-3p	2	24	8	14	9	2	55	7	6	27	39	24	9	5	13	9	26	14	10	7	5	6	3	7	49	34	3	6	13	7	5	11	31	6	18	17	531	0.0014834	1.99755	250	14.834	3.89084
mir-339	5	7	4	5	7	51	13	43	13	2	23	39	11	20	5	2	12	7	0	5	1	4	20	46	7	0	0	13	13	18	20	11	64	15	0	21	527	0.00147223	1.99903	252	14.7223	3.87993
mir-505-5p	23	26	24	13	7	18	16	35	25	3	21	32	4	9	6	2	7	18	10	16	8	7	6	18	13	11	7	22	14	12	14	18	33	8	6	9	521	0.00145546	2.00048	253	14.5546	3.86341
mir-34a	10	11	6	11	33	39	9	17	4	2	21	49	9	32	17	13	2	22	1	15	3	21	17	20	10	4	2	9	10	10	6	15	33	2	5	12	502	0.00140239	2.00188	254	14.0239	3.80981
mir-181b	3	62	8	9	12	16	37	7	8	2	14	22	9	15	5	5	12	6	6	10	4	5	3	8	15	5	2	3	10	12	11	12	69	5	4	25	461	0.00128785	2.00317	255	12.8785	3.68689
mir-503-5p	10	27	21	2	14	21	9	8	14	7	11	30	8	11	18	20	4	13	7	23	13	15	10	13	6	5	8	6	13	15	8	14	16	8	15	3	446	0.00124594	2.00442	256	12.4594	3.63917
mir-2320-5p	3	12	17	7	20	13	6	15	5	13	30	44	2	8	19	9	4	16	3	21	5	11	7	14	19	8	14	4	15	18	6	13	22	4	10	7	444	0.00124036	2.00566	257	12.4036	3.63268
mir-450a	5	6	7	10	6	29	24	23	9	6	23	32	8	17	10	8	11	9	1	9	3	3	23	5	8	2	1	14	10	37	22	19	20	13	3	6	442	0.00123477	2.00689	258	12.3477	3.62617
mir-925p	8	15	11	6	11	14	42	19	10	10	16	14	3	8	10	3	8	4	29	14	5	10	6	14	25	7	2	14	11	19	5	12	16	4	4	5	414	0.00115655	2.00805	259	11.5655	3.53176
mir-454	14	31	15	2	14	26	19	15	7	5	20	30	3	7	10	6	6	5	4	19	7	11	13	5	9	6	6	8	6	17	10	10	14	8	5	10	403	0.00112582	2.00918	260	11.2582	3.4929
mir-320c	28	16	15	9	13	12	4	13	8	17	18	31	6	11	13	7	2	16	9	12	5	13	0	8	6	4	2	6	8	11	7	9	16	3	15	3	376	0.00105039	2.01023	261	10.5039	3.39286
mir-532-3p	4	45	17	3	18	17	4	21	5	1	17	82	1	3	5	5	3	3	0	15	3	15	5	10	4	2	1	2	9	7	5	6	31	4	1	1	375	0.0010476	2.01127	262	10.476	3.38902
mir-7137	16	16	15	3	18	14	8	19	7	8	13	33	6	12	4	4	1	12	5	18	2	13	6	13	10	2	3	5	5	14	9	9	34	2	8	7	374	0.00104481	2.01232	263	10.4481	3.38516
mir-677	15	14	11	4	25	25	6	24	11	3	20	3	3	10	13	3	4	6	8	8	6	6	7	27	14	6	5	11	4	8	1	6	12	7	6	11	353	0.00098614	2.0133	264	9.8614	3.30179
mir-1296-5p	2	23	10	10	8	24	3	14	4	3	17	45	4	3	2	6	5	15	8	13	4	13	4	6	13	6	7	4	5	9	7	4	3	11	7	5	327	0.000913507	2.01422	265	9.13507	3.19142
mir-20b	10	22	16	0	22	26	2	15	10	0	22	28	2	10	3	6	1	4	2	17	0	23	4	3	5	1	4	8	7	1	2	11	21	5	2	5	320	0.000893952	2.01511	266	8.93952	3.1602
mir-3195	5	9	23	24	3	5	7	4	1	24	10	6	4	15	12	1	21	13	4	5	34	0	2	0	11	6	2	4	5	7	2	8	8	9	17	9	320	0.000893952	2.01601	266	8.93952	3.1602
mir-218b	2	31	6	5	6	8	34	7	3	9	13	28	3	7	4	5	7	3	1	3	0	2	3	8	14	16	0	1	5	4	5	3	30	6	2	14	298	0.000832492	2.01684	268	8.32492	3.05744
mir-296-5p	2	6	4	1	11	26	3	19	2	1	11	24	2	6	4	1	1	8	0	6	0	12	3	12	3	0	5	5	2	14	4	1	21	8	4	10	242	0.000676051	2.01751	269	6.76051	2.75713
