# Supplementary material for: Small RNA-seq analysis of single porcine blastocysts revealed that maternal estradiol-17beta exposure does not affect miRNA isoform (isomiR) expression
Source: BMC Genomics. 2018 Aug 6;19:590. doi: 10.1186/s12864-018-4954-9 (PMC6090871; doi:10.1186/s12864-018-4954-9)
Supplement: Supplementary file 4 — Table S2. Blast result with all hits to database files found (E-MTAB-6201). (XLSX 2127 kb) [file 12864_2018_4954_MOESM4_ESM.xlsx]

## Sheet: Sheet1
correct_seq	type	mixed	miRNA.type	miRNA_status	templated	species	mature_ssc_bta_hsa	precursor_ssc_bta_hsa	mirbase_id	ssc_trans	ssc_tRNA	ssc_piRNA	hsa_trans
AAAGTGCCTCCATGTTTTAGTAG	antisense					human	NA	NA		NA	NA	NA	ENST00000362188,gene_biotype:antisense,gene_symbol:MIR302B
AAAGTGCTCCCATGTTTTAGTAG	antisense					human	NA	NA		NA	NA	NA	ENST00000362188,gene_biotype:antisense,gene_symbol:MIR302B
AAAGTGCTTCCACGTTTTAGTAG	antisense					human	NA	NA		NA	NA	NA	ENST00000362188,gene_biotype:antisense,gene_symbol:MIR302B
AAAGTGCTTCCATGCTTTAGTAG	antisense					human	NA	NA		NA	NA	NA	ENST00000362188,gene_biotype:antisense,gene_symbol:MIR302B
AAAGTGCTTCCATGTTCTAGTAG	antisense					human	NA	NA		NA	NA	NA	ENST00000362188,gene_biotype:antisense,gene_symbol:MIR302B
AAAGTGCTTCCATGTTTT	antisense					human	NA	NA		NA	NA	NA	ENST00000362188,gene_biotype:antisense,gene_symbol:MIR302B
AAAGTGCTTCCATGTTTTAGT	antisense					human	NA	NA		NA	NA	NA	ENST00000362188,gene_biotype:antisense,gene_symbol:MIR302B
AAAGTGCTTCCATGTTTTAGTAA	antisense					human	NA	NA		NA	NA	NA	ENST00000362188,gene_biotype:antisense,gene_symbol:MIR302B
AAAGTGCTTCCATGTTTTAGTAC	antisense					human	NA	NA		NA	NA	NA	ENST00000362188,gene_biotype:antisense,gene_symbol:MIR302B
AAAGTGCTTCCATGTTTTAGTAG	antisense					human	NA	NA		NA	NA	NA	ENST00000362188,gene_biotype:antisense,gene_symbol:MIR302B
AAAGTGCTTCCATGTTTTAGTAGA	antisense					human	NA	NA		NA	NA	NA	ENST00000362188,gene_biotype:antisense,gene_symbol:MIR302B
AAAGTGCTTCCATGTTTTAGTAGT	antisense					human	NA	NA		NA	NA	NA	ENST00000362188,gene_biotype:antisense,gene_symbol:MIR302B
AAAGTGCTTCCATGTTTTAGTAT	antisense					human	NA	NA		NA	NA	NA	ENST00000362188,gene_biotype:antisense,gene_symbol:MIR302B
AAAGTGCTTCCATGTTTTGGTAG	antisense					human	NA	NA		NA	NA	NA	ENST00000362188,gene_biotype:antisense,gene_symbol:MIR302B
AAAGTGCTTCCGTGTTTTAGTAG	antisense					human	NA	NA		NA	NA	NA	ENST00000362188,gene_biotype:antisense,gene_symbol:MIR302B
AAGTGCCTCCATGTTTTAGTAG	antisense					human	NA	NA		NA	NA	NA	ENST00000362188,gene_biotype:antisense,gene_symbol:MIR302B
AAGTGCTCCCATGTTTTAGTAG	antisense					human	NA	NA		NA	NA	NA	ENST00000362188,gene_biotype:antisense,gene_symbol:MIR302B
AAGTGCTTCCACGTTTTAGTAG	antisense					human	NA	NA		NA	NA	NA	ENST00000362188,gene_biotype:antisense,gene_symbol:MIR302B
AAGTGCTTCCATGCTTTAGTAG	antisense					human	NA	NA		NA	NA	NA	ENST00000362188,gene_biotype:antisense,gene_symbol:MIR302B
AAGTGCTTCCATGGTTTAGTAG	antisense					human	NA	NA		NA	NA	NA	ENST00000362188,gene_biotype:antisense,gene_symbol:MIR302B
AAGTGCTTCCATGTCTTAGTAG	antisense					human	NA	NA		NA	NA	NA	ENST00000362188,gene_biotype:antisense,gene_symbol:MIR302B
AAGTGCTTCCATGTTCTAGTAG	antisense					human	NA	NA		NA	NA	NA	ENST00000362188,gene_biotype:antisense,gene_symbol:MIR302B
AAGTGCTTCCATGTTTCAGTAG	antisense					human	NA	NA		NA	NA	NA	ENST00000362188,gene_biotype:antisense,gene_symbol:MIR302B
AAGTGCTTCCATGTTTTAGTCA	antisense					human	NA	NA		NA	NA	NA	ENST00000362188,gene_biotype:antisense,gene_symbol:MIR302B
AAGTGCTTCCATGTTTTAGTCG	antisense					human	NA	NA		NA	NA	NA	ENST00000362188,gene_biotype:antisense,gene_symbol:MIR302B
AAGTGCTTCCATGTTTTAGTTG	antisense					human	NA	NA		NA	NA	NA	ENST00000362188,gene_biotype:antisense,gene_symbol:MIR302B
AAGTGCTTCCATGTTTTGGTAG	antisense					human	NA	NA		NA	NA	NA	ENST00000362188,gene_biotype:antisense,gene_symbol:MIR302B
AAGTGCTTCCGTGTTTTAGTAG	antisense					human	NA	NA		NA	NA	NA	ENST00000362188,gene_biotype:antisense,gene_symbol:MIR302B
AAGTGTTTCCATGTTTTAGTAG	antisense					human	NA	NA		NA	NA	NA	ENST00000362188,gene_biotype:antisense,gene_symbol:MIR302B
AATTGCACTCGTCCCGGCCTCC	antisense					human	NA	NA		NA	NA	NA	ENST00000607575,gene_biotype:antisense,gene_symbol:MIR92B
AATTGCACTCGTCCCGGCCTCT	antisense					human	NA	NA		NA	NA	NA	ENST00000607575,gene_biotype:antisense,gene_symbol:MIR92B
AGAGTGCTTCCATGTTTTAGTAG	antisense					human	NA	NA		NA	NA	NA	ENST00000362188,gene_biotype:antisense,gene_symbol:MIR302B
AGGTGCTTCCATGTTTTAGTAG	antisense					human	NA	NA		NA	NA	NA	ENST00000362188,gene_biotype:antisense,gene_symbol:MIR302B
ATTGCACTCGTCCCGGCCTGT	antisense					human	NA	NA		NA	NA	NA	ENST00000607575,gene_biotype:antisense,gene_symbol:MIR92B
CAAGTGCCTCCATGTTTTAGTAG	antisense					human	NA	NA		NA	NA	NA	ENST00000362188,gene_biotype:antisense,gene_symbol:MIR302B
CAAGTGCTCCCATGTTTTAGTAG	antisense					human	NA	NA		NA	NA	NA	ENST00000362188,gene_biotype:antisense,gene_symbol:MIR302B
CAAGTGCTTCCACGTTTTAGTAG	antisense					human	NA	NA		NA	NA	NA	ENST00000362188,gene_biotype:antisense,gene_symbol:MIR302B
CAAGTGCTTCCATGCTTTAGTAG	antisense					human	NA	NA		NA	NA	NA	ENST00000362188,gene_biotype:antisense,gene_symbol:MIR302B
CAAGTGCTTCCATGTTCTAGTAG	antisense					human	NA	NA		NA	NA	NA	ENST00000362188,gene_biotype:antisense,gene_symbol:MIR302B
CAAGTGCTTCCATGTTTT	antisense					human	NA	NA		NA	NA	NA	ENST00000362188,gene_biotype:antisense,gene_symbol:MIR302B
CAAGTGCTTCCATGTTTTAGT	antisense					human	NA	NA		NA	NA	NA	ENST00000362188,gene_biotype:antisense,gene_symbol:MIR302B
CAAGTGCTTCCATGTTTTAGTAA	antisense					human	NA	NA		NA	NA	NA	ENST00000362188,gene_biotype:antisense,gene_symbol:MIR302B
CAAGTGCTTCCATGTTTTAGTAC	antisense					human	NA	NA		NA	NA	NA	ENST00000362188,gene_biotype:antisense,gene_symbol:MIR302B
CAAGTGCTTCCATGTTTTAGTAG	antisense					human	NA	NA		NA	NA	NA	ENST00000362188,gene_biotype:antisense,gene_symbol:MIR302B
CAAGTGCTTCCATGTTTTAGTAGA	antisense					human	NA	NA		NA	NA	NA	ENST00000362188,gene_biotype:antisense,gene_symbol:MIR302B
CAAGTGCTTCCATGTTTTAGTAGG	antisense					human	NA	NA		NA	NA	NA	ENST00000362188,gene_biotype:antisense,gene_symbol:MIR302B
CAAGTGCTTCCATGTTTTAGTAGT	antisense					human	NA	NA		NA	NA	NA	ENST00000362188,gene_biotype:antisense,gene_symbol:MIR302B
CAAGTGCTTCCATGTTTTAGTAT	antisense					human	NA	NA		NA	NA	NA	ENST00000362188,gene_biotype:antisense,gene_symbol:MIR302B
CAAGTGCTTCCGTGTTTTAGTAG	antisense					human	NA	NA		NA	NA	NA	ENST00000362188,gene_biotype:antisense,gene_symbol:MIR302B
CAGTGCTTCCATGTTTTAGT	antisense					human	NA	NA		NA	NA	NA	ENST00000362188,gene_biotype:antisense,gene_symbol:MIR302B
CAGTGCTTCCATGTTTTAGTAG	antisense					human	NA	NA		NA	NA	NA	ENST00000362188,gene_biotype:antisense,gene_symbol:MIR302B
CAGTGCTTCCATGTTTTAGTAGA	antisense					human	NA	NA		NA	NA	NA	ENST00000362188,gene_biotype:antisense,gene_symbol:MIR302B
CATTGCACTCGTCCCGGCCTCC	antisense					human	NA	NA		NA	NA	NA	ENST00000607575,gene_biotype:antisense,gene_symbol:MIR92B
CATTGCACTCGTCCCGGCCTCT	antisense					human	NA	NA		NA	NA	NA	ENST00000607575,gene_biotype:antisense,gene_symbol:MIR92B
CGAGTGCTTCCATGTTTTAGTAG	antisense					human	NA	NA		NA	NA	NA	ENST00000362188,gene_biotype:antisense,gene_symbol:MIR302B
GAAGTGCCTCCATGTTTTAGTAG	antisense					human	NA	NA		NA	NA	NA	ENST00000362188,gene_biotype:antisense,gene_symbol:MIR302B
GAAGTGCTCCCATGTTTTAGTAG	antisense					human	NA	NA		NA	NA	NA	ENST00000362188,gene_biotype:antisense,gene_symbol:MIR302B
GAAGTGCTTCCACGTTTTAGTAG	antisense					human	NA	NA		NA	NA	NA	ENST00000362188,gene_biotype:antisense,gene_symbol:MIR302B
GAAGTGCTTCCATGTTTT	antisense					human	NA	NA		NA	NA	NA	ENST00000362188,gene_biotype:antisense,gene_symbol:MIR302B
GAAGTGCTTCCATGTTTTAGT	antisense					human	NA	NA		NA	NA	NA	ENST00000362188,gene_biotype:antisense,gene_symbol:MIR302B
GAAGTGCTTCCATGTTTTAGTAA	antisense					human	NA	NA		NA	NA	NA	ENST00000362188,gene_biotype:antisense,gene_symbol:MIR302B
GAAGTGCTTCCATGTTTTAGTAC	antisense					human	NA	NA		NA	NA	NA	ENST00000362188,gene_biotype:antisense,gene_symbol:MIR302B
GAAGTGCTTCCATGTTTTAGTAG	antisense					human	NA	NA		NA	NA	NA	ENST00000362188,gene_biotype:antisense,gene_symbol:MIR302B
GAAGTGCTTCCATGTTTTAGTAGA	antisense					human	NA	NA		NA	NA	NA	ENST00000362188,gene_biotype:antisense,gene_symbol:MIR302B
GAAGTGCTTCCATGTTTTAGTAGG	antisense					human	NA	NA		NA	NA	NA	ENST00000362188,gene_biotype:antisense,gene_symbol:MIR302B
GAAGTGCTTCCATGTTTTAGTAGT	antisense					human	NA	NA		NA	NA	NA	ENST00000362188,gene_biotype:antisense,gene_symbol:MIR302B
GAAGTGCTTCCATGTTTTAGTAT	antisense					human	NA	NA		NA	NA	NA	ENST00000362188,gene_biotype:antisense,gene_symbol:MIR302B
GAGTGCTTCCATGTTTTAGT	antisense					human	NA	NA		NA	NA	NA	ENST00000362188,gene_biotype:antisense,gene_symbol:MIR302B
GAGTGCTTCCATGTTTTAGTAG	antisense					human	NA	NA		NA	NA	NA	ENST00000362188,gene_biotype:antisense,gene_symbol:MIR302B
GAGTGCTTCCATGTTTTAGTAGA	antisense					human	NA	NA		NA	NA	NA	ENST00000362188,gene_biotype:antisense,gene_symbol:MIR302B
GATTGCACTCGTCCCGGCCTCC	antisense					human	NA	NA		NA	NA	NA	ENST00000607575,gene_biotype:antisense,gene_symbol:MIR92B
GATTGCACTCGTCCCGGCCTCT	antisense					human	NA	NA		NA	NA	NA	ENST00000607575,gene_biotype:antisense,gene_symbol:MIR92B
GGAGTGCTTCCATGTTTTAGTAG	antisense					human	NA	NA		NA	NA	NA	ENST00000362188,gene_biotype:antisense,gene_symbol:MIR302B
TAAGAGCTTCCATGTTTTAGTAG	antisense					human	NA	NA		NA	NA	NA	ENST00000362188,gene_biotype:antisense,gene_symbol:MIR302B
TAAGCGCTTCCATGTTTTAGT	antisense					human	NA	NA		NA	NA	NA	ENST00000362188,gene_biotype:antisense,gene_symbol:MIR302B
TAAGCGCTTCCATGTTTTAGTAG	antisense					human	NA	NA		NA	NA	NA	ENST00000362188,gene_biotype:antisense,gene_symbol:MIR302B
TAAGCGCTTCCATGTTTTAGTAGA	antisense					human	NA	NA		NA	NA	NA	ENST00000362188,gene_biotype:antisense,gene_symbol:MIR302B
TAAGTACTTCCATGTTTTAGT	antisense					human	NA	NA		NA	NA	NA	ENST00000362188,gene_biotype:antisense,gene_symbol:MIR302B
TAAGTACTTCCATGTTTTAGTAG	antisense					human	NA	NA		NA	NA	NA	ENST00000362188,gene_biotype:antisense,gene_symbol:MIR302B
TAAGTGATTCCATGTTTTAGTAG	antisense					human	NA	NA		NA	NA	NA	ENST00000362188,gene_biotype:antisense,gene_symbol:MIR302B
TAAGTGCATCCATGTTTTAGTAG	antisense					human	NA	NA		NA	NA	NA	ENST00000362188,gene_biotype:antisense,gene_symbol:MIR302B
TAAGTGCCTCCATGTTTTAGT	antisense					human	NA	NA		NA	NA	NA	ENST00000362188,gene_biotype:antisense,gene_symbol:MIR302B
TAAGTGCCTCCATGTTTTAGTAA	antisense					human	NA	NA		NA	NA	NA	ENST00000362188,gene_biotype:antisense,gene_symbol:MIR302B
TAAGTGCCTCCATGTTTTAGTAG	antisense					human	NA	NA		NA	NA	NA	ENST00000362188,gene_biotype:antisense,gene_symbol:MIR302B
TAAGTGCCTCCATGTTTTAGTAGA	antisense					human	NA	NA		NA	NA	NA	ENST00000362188,gene_biotype:antisense,gene_symbol:MIR302B
TAAGTGCGTCCATGTTTTAGTAG	antisense					human	NA	NA		NA	NA	NA	ENST00000362188,gene_biotype:antisense,gene_symbol:MIR302B
TAAGTGCTACCATGTTTTAGT	antisense					human	NA	NA		NA	NA	NA	ENST00000362188,gene_biotype:antisense,gene_symbol:MIR302B
TAAGTGCTACCATGTTTTAGTAG	antisense					human	NA	NA		NA	NA	NA	ENST00000362188,gene_biotype:antisense,gene_symbol:MIR302B
TAAGTGCTCCCATGTTTTAGT	antisense					human	NA	NA		NA	NA	NA	ENST00000362188,gene_biotype:antisense,gene_symbol:MIR302B
TAAGTGCTCCCATGTTTTAGTAA	antisense					human	NA	NA		NA	NA	NA	ENST00000362188,gene_biotype:antisense,gene_symbol:MIR302B
TAAGTGCTCCCATGTTTTAGTAG	antisense					human	NA	NA		NA	NA	NA	ENST00000362188,gene_biotype:antisense,gene_symbol:MIR302B
TAAGTGCTCCCATGTTTTAGTAGA	antisense					human	NA	NA		NA	NA	NA	ENST00000362188,gene_biotype:antisense,gene_symbol:MIR302B
TAAGTGCTTACATGTTTTAGTAG	antisense					human	NA	NA		NA	NA	NA	ENST00000362188,gene_biotype:antisense,gene_symbol:MIR302B
TAAGTGCTTCAATGTTTTAGTAG	antisense					human	NA	NA		NA	NA	NA	ENST00000362188,gene_biotype:antisense,gene_symbol:MIR302B
TAAGTGCTTCCAAGTTTTAGTAG	antisense					human	NA	NA		NA	NA	NA	ENST00000362188,gene_biotype:antisense,gene_symbol:MIR302B
TAAGTGCTTCCACGTTTTAGT	antisense					human	NA	NA		NA	NA	NA	ENST00000362188,gene_biotype:antisense,gene_symbol:MIR302B
TAAGTGCTTCCACGTTTTAGTAG	antisense					human	NA	NA		NA	NA	NA	ENST00000362188,gene_biotype:antisense,gene_symbol:MIR302B
TAAGTGCTTCCACGTTTTAGTAGA	antisense					human	NA	NA		NA	NA	NA	ENST00000362188,gene_biotype:antisense,gene_symbol:MIR302B
TAAGTGCTTCCATATTTTAGTAG	antisense					human	NA	NA		NA	NA	NA	ENST00000362188,gene_biotype:antisense,gene_symbol:MIR302B
TAAGTGCTTCCATGGTTTAGT	antisense					human	NA	NA		NA	NA	NA	ENST00000362188,gene_biotype:antisense,gene_symbol:MIR302B
TAAGTGCTTCCATGGTTTAGTAG	antisense					human	NA	NA		NA	NA	NA	ENST00000362188,gene_biotype:antisense,gene_symbol:MIR302B
TAAGTGCTTCCATGTCTTAGT	antisense					human	NA	NA		NA	NA	NA	ENST00000362188,gene_biotype:antisense,gene_symbol:MIR302B
TAAGTGCTTCCATGTCTTAGTAG	antisense					human	NA	NA		NA	NA	NA	ENST00000362188,gene_biotype:antisense,gene_symbol:MIR302B
TAAGTGCTTCCATGTTATAGTAG	antisense					human	NA	NA		NA	NA	NA	ENST00000362188,gene_biotype:antisense,gene_symbol:MIR302B
TAAGTGCTTCCATGTTCTAGT	antisense					human	NA	NA		NA	NA	NA	ENST00000362188,gene_biotype:antisense,gene_symbol:MIR302B
TAAGTGCTTCCATGTTCTAGTAG	antisense					human	NA	NA		NA	NA	NA	ENST00000362188,gene_biotype:antisense,gene_symbol:MIR302B
TAAGTGCTTCCATGTTCTAGTAGA	antisense					human	NA	NA		NA	NA	NA	ENST00000362188,gene_biotype:antisense,gene_symbol:MIR302B
TAAGTGCTTCCATGTTTCAGTAG	antisense					human	NA	NA		NA	NA	NA	ENST00000362188,gene_biotype:antisense,gene_symbol:MIR302B
TAAGTGCTTCCATGTTTTGGTAG	antisense					human	NA	NA		NA	NA	NA	ENST00000362188,gene_biotype:antisense,gene_symbol:MIR302B
TAAGTGCTTCCATGTTTTGGTAGA	antisense					human	NA	NA		NA	NA	NA	ENST00000362188,gene_biotype:antisense,gene_symbol:MIR302B
TAAGTGCTTCCATGTTTTTGTAG	antisense					human	NA	NA		NA	NA	NA	ENST00000362188,gene_biotype:antisense,gene_symbol:MIR302B
TAAGTGCTTCCGTGTTTTAGT	antisense					human	NA	NA		NA	NA	NA	ENST00000362188,gene_biotype:antisense,gene_symbol:MIR302B
TAAGTGCTTCCGTGTTTTAGTAG	antisense					human	NA	NA		NA	NA	NA	ENST00000362188,gene_biotype:antisense,gene_symbol:MIR302B
TAAGTGCTTCCGTGTTTTAGTAGA	antisense					human	NA	NA		NA	NA	NA	ENST00000362188,gene_biotype:antisense,gene_symbol:MIR302B
TAAGTGCTTCTATGTTTTAGT	antisense					human	NA	NA		NA	NA	NA	ENST00000362188,gene_biotype:antisense,gene_symbol:MIR302B
TAAGTGCTTCTATGTTTTAGTAG	antisense					human	NA	NA		NA	NA	NA	ENST00000362188,gene_biotype:antisense,gene_symbol:MIR302B
TAAGTGCTTTCATGTTTTAGTAG	antisense					human	NA	NA		NA	NA	NA	ENST00000362188,gene_biotype:antisense,gene_symbol:MIR302B
TAAGTGTTTCCATGTTTTAGT	antisense					human	NA	NA		NA	NA	NA	ENST00000362188,gene_biotype:antisense,gene_symbol:MIR302B
TAAGTGTTTCCATGTTTTAGTAG	antisense					human	NA	NA		NA	NA	NA	ENST00000362188,gene_biotype:antisense,gene_symbol:MIR302B
TAGTGCTTCCATGTTTTAGT	antisense					human	NA	NA		NA	NA	NA	ENST00000362188,gene_biotype:antisense,gene_symbol:MIR302B
TAGTGCTTCCATGTTTTAGTAG	antisense					human	NA	NA		NA	NA	NA	ENST00000362188,gene_biotype:antisense,gene_symbol:MIR302B
TAGTGCTTCCATGTTTTAGTAGA	antisense					human	NA	NA		NA	NA	NA	ENST00000362188,gene_biotype:antisense,gene_symbol:MIR302B
TATTGCACTCGTCCCGGCCTGC	antisense					human	NA	NA		NA	NA	NA	ENST00000607575,gene_biotype:antisense,gene_symbol:MIR92B
TATTGCACTCGTCCCGGCCTGT	antisense					human	NA	NA		NA	NA	NA	ENST00000607575,gene_biotype:antisense,gene_symbol:MIR92B
TATTGCACTCGTCCCGGCCTTT	antisense					human	NA	NA		NA	NA	NA	ENST00000607575,gene_biotype:antisense,gene_symbol:MIR92B
TGAGTGCTTCCATGTTTTAGT	antisense					human	NA	NA		NA	NA	NA	ENST00000362188,gene_biotype:antisense,gene_symbol:MIR302B
TGAGTGCTTCCATGTTTTAGTAG	antisense					human	NA	NA		NA	NA	NA	ENST00000362188,gene_biotype:antisense,gene_symbol:MIR302B
TTAGTGCTTCCATGTTTTAGTAG	antisense					human	NA	NA		NA	NA	NA	ENST00000362188,gene_biotype:antisense,gene_symbol:MIR302B
AAAAACGTGAGGCGCTGCTAT	lincRNA					human	NA	NA		NA	NA	NA	ENST00000362227,gene_biotype:lincRNA,gene_symbol:MIR503HG
AAAAACGTGAGGCGCTGCTATA	lincRNA					human	NA	NA		NA	NA	NA	ENST00000362227,gene_biotype:lincRNA,gene_symbol:MIR503HG
AAAAAGAACTTTGAAGAG	lincRNA					human	NA	NA		NA	NA	NA	ENST00000589566,gene_biotype:lincRNA,gene_symbol:LINC01255
AACCACACGGGGCTCATTCTCAGCACGGCTG	lincRNA					human	NA	NA		NA	NA	NA	ENST00000602361,gene_biotype:lincRNA,gene_symbol:RMRP
AACCACACGGGGCTCATTCTCAGCACGGCTGA	lincRNA					human	NA	NA		NA	NA	NA	ENST00000602361,gene_biotype:lincRNA,gene_symbol:RMRP
AACTGGCTCTGTGGCGCAATGGATAGCGCA	lincRNA					human	NA	NA		NA	NA	NA	ENST00000565336,gene_biotype:lincRNA,gene_symbol:RP4-561L24
AACTGGCTCTGTGGCGCAATGGATAGCGCATT	lincRNA					human	NA	NA		NA	NA	NA	ENST00000565336,gene_biotype:lincRNA,gene_symbol:RP4-561L24
AACTGGCTCTGTGGCGCAATGGATAGCGCATTG	lincRNA					human	NA	NA		NA	NA	NA	ENST00000565336,gene_biotype:lincRNA,gene_symbol:RP4-561L24
AACTGGCTCTGTGGCGCAATGGATAGCGCATTGG	lincRNA					human	NA	NA		NA	NA	NA	ENST00000565336,gene_biotype:lincRNA,gene_symbol:RP4-561L24
AACTGGCTCTGTGGCGCAATGGATAGCGCATTGGA	lincRNA					human	NA	NA		NA	NA	NA	ENST00000565336,gene_biotype:lincRNA,gene_symbol:RP4-561L24
AACTGGCTCTGTGGCGCAATGGATAGCGCATTGGAC	lincRNA					human	NA	NA		NA	NA	NA	ENST00000565336,gene_biotype:lincRNA,gene_symbol:RP4-561L24
AACTGGCTCTGTGGCGCAATGGATAGCGCATTGGACT	lincRNA					human	NA	NA		NA	NA	NA	ENST00000565336,gene_biotype:lincRNA,gene_symbol:RP4-561L24
AAGCCGCCAGTTGAAGAACTGT	lincRNA					human	NA	NA		NA	NA	NA	ENST00000334146,gene_biotype:lincRNA,gene_symbol:MIR22HG
AAGCTGCCAGCTGAAGAACTGT	lincRNA					human	NA	NA		NA	NA	NA	ENST00000334146,gene_biotype:lincRNA,gene_symbol:MIR22HG
AAGCTGCCAGTCGAAGAACTGT	lincRNA					human	NA	NA		NA	NA	NA	ENST00000334146,gene_biotype:lincRNA,gene_symbol:MIR22HG
AAGCTGCCAGTTGAAGAGCTGT	lincRNA					human	NA	NA		NA	NA	NA	ENST00000334146,gene_biotype:lincRNA,gene_symbol:MIR22HG
AAGCTGCCAGTTGAAGGACTGT	lincRNA					human	NA	NA		NA	NA	NA	ENST00000334146,gene_biotype:lincRNA,gene_symbol:MIR22HG
AAGCTGCCAGTTGAGGAACTGT	lincRNA					human	NA	NA		NA	NA	NA	ENST00000334146,gene_biotype:lincRNA,gene_symbol:MIR22HG
AAGCTGCCAGTTGGAGAACTGT	lincRNA					human	NA	NA		NA	NA	NA	ENST00000334146,gene_biotype:lincRNA,gene_symbol:MIR22HG
AAGCTGCCGGTTGAAGAACTGT	lincRNA					human	NA	NA		NA	NA	NA	ENST00000334146,gene_biotype:lincRNA,gene_symbol:MIR22HG
ACACAGGCAGTGCGCTTCCGCGCACCAACCACACGGGGCTCATTCTCAGCACGGCTGA	lincRNA					human	NA	NA		NA	NA	NA	ENST00000602361,gene_biotype:lincRNA,gene_symbol:RMRP
ACACGGGGCTCATTCTCAGCACGGCTG	lincRNA					human	NA	NA		NA	NA	NA	ENST00000602361,gene_biotype:lincRNA,gene_symbol:RMRP
ACACGGGGCTCATTCTCAGCACGGCTGA	lincRNA					human	NA	NA		NA	NA	NA	ENST00000602361,gene_biotype:lincRNA,gene_symbol:RMRP
ACACGGGGCTCATTCTCAGCACGGCTGAT	lincRNA					human	NA	NA		NA	NA	NA	ENST00000602361,gene_biotype:lincRNA,gene_symbol:RMRP
ACACGGGGCTCATTCTCAGCACGGCTGT	lincRNA					human	NA	NA		NA	NA	NA	ENST00000602361,gene_biotype:lincRNA,gene_symbol:RMRP
ACCACACGGGGCTCATTCTCAGCACGGCTGA	lincRNA					human	NA	NA		NA	NA	NA	ENST00000602361,gene_biotype:lincRNA,gene_symbol:RMRP
ACCCGACTAGCTCAGTCGGTAGAGCATGAGAC	lincRNA					human	NA	NA		NA	NA	NA	ENST00000570843,gene_biotype:lincRNA,gene_symbol:RP11-473M20
ACCCGACTAGCTCAGTCGGTAGAGCATGAGACT	lincRNA					human	NA	NA		NA	NA	NA	ENST00000570843,gene_biotype:lincRNA,gene_symbol:RP11-473M20
ACCCGGCTAGCTCAGTCGGTAGAGCATGAGACA	lincRNA					human	NA	NA		NA	NA	NA	ENST00000570843,gene_biotype:lincRNA,gene_symbol:RP11-473M20
ACCCGGCTAGCTCAGTCGGTAGAGCATGAGACC	lincRNA					human	NA	NA		NA	NA	NA	ENST00000570843,gene_biotype:lincRNA,gene_symbol:RP11-473M20
ACCCGGCTAGCTCAGTCGGTAGAGCATGAGAT	lincRNA					human	NA	NA		NA	NA	NA	ENST00000570843,gene_biotype:lincRNA,gene_symbol:RP11-473M20
ACCCGGCTAGCTCAGTTGGTAGAGCATGAGACC	lincRNA					human	NA	NA		NA	NA	NA	ENST00000570843,gene_biotype:lincRNA,gene_symbol:RP11-473M20
ACCCTGGTGGTCTAGTGGCTAGGATTCGGA	lincRNA					human	NA	NA		NA	NA	NA	ENST00000415386,gene_biotype:lincRNA,gene_symbol:RP5-875O13
ACCCTGGTGGTCTAGTGGCTAGGATTCGGCA	lincRNA					human	NA	NA		NA	NA	NA	ENST00000415386,gene_biotype:lincRNA,gene_symbol:RP5-875O13
ACCCTGGTGGTCTAGTGGCTAGGATTCGGCGCA	lincRNA					human	NA	NA		NA	NA	NA	ENST00000415386,gene_biotype:lincRNA,gene_symbol:RP5-875O13
ACCCTGGTGGTCTAGTGGCTAGGATTCGGCGCC	lincRNA					human	NA	NA		NA	NA	NA	ENST00000415386,gene_biotype:lincRNA,gene_symbol:RP5-875O13
ACCCTGGTGGTCTAGTGGCTAGGATTCGGCGCTC	lincRNA					human	NA	NA		NA	NA	NA	ENST00000415386,gene_biotype:lincRNA,gene_symbol:RP5-875O13
ACCCTGGTGGTCTAGTGGCTAGGATTCGGCGCTTC	lincRNA					human	NA	NA		NA	NA	NA	ENST00000415386,gene_biotype:lincRNA,gene_symbol:RP5-875O13
ACCCTGGTGGTCTAGTGGCTAGGATTCGGCGT	lincRNA					human	NA	NA		NA	NA	NA	ENST00000415386,gene_biotype:lincRNA,gene_symbol:RP5-875O13
ACCCTGGTGGTCTAGTGGCTAGGATTCGGCT	lincRNA					human	NA	NA		NA	NA	NA	ENST00000415386,gene_biotype:lincRNA,gene_symbol:RP5-875O13
ACCCTGGTGGTCTAGTGGCTAGGATTCGGT	lincRNA					human	NA	NA		NA	NA	NA	ENST00000415386,gene_biotype:lincRNA,gene_symbol:RP5-875O13
ACCCTGGTGGTCTAGTGGTTAGGATTCGGCGCTT	lincRNA					human	NA	NA		NA	NA	NA	ENST00000415386,gene_biotype:lincRNA,gene_symbol:RP5-875O13
ACGGGGCTCATTCTCAGCACGGCTGA	lincRNA					human	NA	NA		NA	NA	NA	ENST00000602361,gene_biotype:lincRNA,gene_symbol:RMRP
ACTGGCTCTGTGGCGCAATGGATAGCGCATT	lincRNA					human	NA	NA		NA	NA	NA	ENST00000565336,gene_biotype:lincRNA,gene_symbol:RP4-561L24
ACTGGCTCTGTGGCGCAATGGATAGCGCATTG	lincRNA					human	NA	NA		NA	NA	NA	ENST00000565336,gene_biotype:lincRNA,gene_symbol:RP4-561L24
ACTTCGATAGCTCAGCTGGTAGAGT	lincRNA					human	NA	NA		NA	NA	NA	ENST00000517961,gene_biotype:lincRNA,gene_symbol:AC084082
ACTTTGGTTATCTAGCTGTATG	lincRNA					human	NA	NA		NA	NA	NA	ENST00000384838,gene_biotype:lincRNA,gene_symbol:LINC00461
ACTTTGGTTATCTAGCTGTATGA	lincRNA					human	NA	NA		NA	NA	NA	ENST00000384838,gene_biotype:lincRNA,gene_symbol:LINC00461
AGAGATGAAGCACTGTAGCTC	lincRNA					human	NA	NA		NA	NA	NA	ENST00000385300,gene_biotype:lincRNA,gene_symbol:CARMN
AGAGGTAGTAGGTTGTAT	lincRNA					human	NA	NA		NA	NA	NA	ENST00000360737,gene_biotype:lincRNA,gene_symbol:MIRLET7BHG
AGAGGTAGTAGGTTGTATAGC	lincRNA					human	NA	NA		NA	NA	NA	ENST00000360737,gene_biotype:lincRNA,gene_symbol:MIRLET7BHG
AGAGGTAGTAGGTTGTATAGT	lincRNA					human	NA	NA		NA	NA	NA	ENST00000360737,gene_biotype:lincRNA,gene_symbol:MIRLET7BHG
AGAGGTAGTAGGTTGTATAGTC	lincRNA					human	NA	NA		NA	NA	NA	ENST00000360737,gene_biotype:lincRNA,gene_symbol:MIRLET7BHG
AGAGGTAGTAGGTTGTATAGTT	lincRNA					human	NA	NA		NA	NA	NA	ENST00000360737,gene_biotype:lincRNA,gene_symbol:MIRLET7BHG
AGAGGTAGTAGGTTGTATAGTTT	lincRNA					human	NA	NA		NA	NA	NA	ENST00000360737,gene_biotype:lincRNA,gene_symbol:MIRLET7BHG
AGAGGTAGTAGGTTGTGTGGT	lincRNA					human	NA	NA		NA	NA	NA	ENST00000360737,gene_biotype:lincRNA,gene_symbol:MIRLET7BHG
AGAGGTAGTAGGTTGTGTGGTC	lincRNA					human	NA	NA		NA	NA	NA	ENST00000360737,gene_biotype:lincRNA,gene_symbol:MIRLET7BHG
AGAGGTAGTAGGTTGTGTGGTT	lincRNA					human	NA	NA		NA	NA	NA	ENST00000360737,gene_biotype:lincRNA,gene_symbol:MIRLET7BHG
AGAGGTAGTAGGTTGTGTGGTTT	lincRNA					human	NA	NA		NA	NA	NA	ENST00000360737,gene_biotype:lincRNA,gene_symbol:MIRLET7BHG
AGCTCGTTGGTCTAGGGGTATGATC	lincRNA					human	NA	NA		NA	NA	NA	ENST00000315707,gene_biotype:lincRNA,gene_symbol:LINC00324
AGCTGGCGCTCTCGCAGG	lincRNA					human	NA	NA		NA	NA	NA	ENST00000629369,gene_biotype:lincRNA,gene_symbol:LINC01242
AGCTTGGTCTAGGGGTATGATTCTCGCTT	lincRNA					human	NA	NA		NA	NA	NA	ENST00000315707,gene_biotype:lincRNA,gene_symbol:LINC00324
AGGAGTGTGACAATGGTGTTT	lincRNA					human	NA	NA		NA	NA	NA	ENST00000385044,gene_biotype:lincRNA,gene_symbol:MIR122
AGGAGTGTGACAATGGTGTTTG	lincRNA					human	NA	NA		NA	NA	NA	ENST00000385044,gene_biotype:lincRNA,gene_symbol:MIR122
AGGAGTGTGACAATGGTGTTTGA	lincRNA					human	NA	NA		NA	NA	NA	ENST00000385044,gene_biotype:lincRNA,gene_symbol:MIR122
AGGAGTGTGACAATGGTGTTTGT	lincRNA					human	NA	NA		NA	NA	NA	ENST00000385044,gene_biotype:lincRNA,gene_symbol:MIR122
AGGCTCAGTTCAGCAGGAAC	lincRNA					human	NA	NA		NA	NA	NA	ENST00000386972,gene_biotype:lincRNA,gene_symbol:MIR24-2
AGGCTCAGTTCAGCAGGAACAG	lincRNA					human	NA	NA		NA	NA	NA	ENST00000386972,gene_biotype:lincRNA,gene_symbol:MIR24-2
AGGCTCAGTTCAGCAGGAACAGT	lincRNA					human	NA	NA		NA	NA	NA	ENST00000386972,gene_biotype:lincRNA,gene_symbol:MIR24-2
AGGCTGCCAGTTGAAGAACTGT	lincRNA					human	NA	NA		NA	NA	NA	ENST00000334146,gene_biotype:lincRNA,gene_symbol:MIR22HG
AGGTGGCTCTGTGGCGCAATGGATAGCGCATT	lincRNA					human	NA	NA		NA	NA	NA	ENST00000565336,gene_biotype:lincRNA,gene_symbol:RP4-561L24
AGGTGGCTCTGTGGCGCAATGGATAGCGCATTG	lincRNA					human	NA	NA		NA	NA	NA	ENST00000565336,gene_biotype:lincRNA,gene_symbol:RP4-561L24
AGGTGGCTCTGTGGCGCAATGGATAGCGCATTGG	lincRNA					human	NA	NA		NA	NA	NA	ENST00000565336,gene_biotype:lincRNA,gene_symbol:RP4-561L24
AGGTGGCTCTGTGGCGCAATGGATAGCGCATTGGA	lincRNA					human	NA	NA		NA	NA	NA	ENST00000565336,gene_biotype:lincRNA,gene_symbol:RP4-561L24
AGGTGGCTCTGTGGCGCAATGGATAGCGCATTGGACT	lincRNA					human	NA	NA		NA	NA	NA	ENST00000565336,gene_biotype:lincRNA,gene_symbol:RP4-561L24
AGGTGGCTCTGTGGCGCAATGGATAGCGCATTGGACTTCT	lincRNA					human	NA	NA		NA	NA	NA	ENST00000565336,gene_biotype:lincRNA,gene_symbol:RP4-561L24
AGTTTACTTTGAAAAAAT	lincRNA					human	NA	NA		NA	NA	NA	ENST00000415338,gene_biotype:lincRNA,gene_symbol:RP5-998N21
AGTTTACTTTGAAAAAATT	lincRNA					human	NA	NA		NA	NA	NA	ENST00000415338,gene_biotype:lincRNA,gene_symbol:RP5-998N21
ATCTGGCTCTGTGGCGCAATGGATAGCGC	lincRNA					human	NA	NA		NA	NA	NA	ENST00000565336,gene_biotype:lincRNA,gene_symbol:RP4-561L24
ATCTGGCTCTGTGGCGCAATGGATAGCGCA	lincRNA					human	NA	NA		NA	NA	NA	ENST00000565336,gene_biotype:lincRNA,gene_symbol:RP4-561L24
ATCTGGCTCTGTGGCGCAATGGATAGCGCATT	lincRNA					human	NA	NA		NA	NA	NA	ENST00000565336,gene_biotype:lincRNA,gene_symbol:RP4-561L24
ATCTGGCTCTGTGGCGCAATGGATAGCGCATTG	lincRNA					human	NA	NA		NA	NA	NA	ENST00000565336,gene_biotype:lincRNA,gene_symbol:RP4-561L24
ATCTGGCTCTGTGGCGCAATGGATAGCGCATTGG	lincRNA					human	NA	NA		NA	NA	NA	ENST00000565336,gene_biotype:lincRNA,gene_symbol:RP4-561L24
ATCTGGCTCTGTGGCGCAATGGATAGCGCATTGGA	lincRNA					human	NA	NA		NA	NA	NA	ENST00000565336,gene_biotype:lincRNA,gene_symbol:RP4-561L24
ATCTGGCTCTGTGGCGCAATGGATAGCGCATTGGAC	lincRNA					human	NA	NA		NA	NA	NA	ENST00000565336,gene_biotype:lincRNA,gene_symbol:RP4-561L24
ATCTGGCTCTGTGGCGCAATGGATAGCGCATTGGACT	lincRNA					human	NA	NA		NA	NA	NA	ENST00000565336,gene_biotype:lincRNA,gene_symbol:RP4-561L24
CACACGGGGCTCATTCTCAGCACGGCTGA	lincRNA					human	NA	NA		NA	NA	NA	ENST00000602361,gene_biotype:lincRNA,gene_symbol:RMRP
CACGGGGCTCATTCTCAGCACGGCTG	lincRNA					human	NA	NA		NA	NA	NA	ENST00000602361,gene_biotype:lincRNA,gene_symbol:RMRP
CACGGGGCTCATTCTCAGCACGGCTGA	lincRNA					human	NA	NA		NA	NA	NA	ENST00000602361,gene_biotype:lincRNA,gene_symbol:RMRP
CACTGGCTCTGTGGCGCAATGGATAGCGCATT	lincRNA					human	NA	NA		NA	NA	NA	ENST00000565336,gene_biotype:lincRNA,gene_symbol:RP4-561L24
CAGCTGCCAGTTGAAGAACTGA	lincRNA					human	NA	NA		NA	NA	NA	ENST00000334146,gene_biotype:lincRNA,gene_symbol:MIR22HG
CAGCTGCCAGTTGAAGAACTGC	lincRNA					human	NA	NA		NA	NA	NA	ENST00000334146,gene_biotype:lincRNA,gene_symbol:MIR22HG
CAGCTGCCAGTTGAAGAACTGT	lincRNA					human	NA	NA		NA	NA	NA	ENST00000334146,gene_biotype:lincRNA,gene_symbol:MIR22HG
CCACGGGGCTCATTCTCAGCACGGCTGA	lincRNA					human	NA	NA		NA	NA	NA	ENST00000602361,gene_biotype:lincRNA,gene_symbol:RMRP
CCCCGACTAGCTCAGTCGGTAGAGCATGAGAC	lincRNA					human	NA	NA		NA	NA	NA	ENST00000570843,gene_biotype:lincRNA,gene_symbol:RP11-473M20
CCCCGGCTAACTCAGTCGGTAGAGCATGAGACT	lincRNA					human	NA	NA		NA	NA	NA	ENST00000570843,gene_biotype:lincRNA,gene_symbol:RP11-473M20
CCCCGGCTAGCTCAGTCGGTAGAGCATGAGACA	lincRNA					human	NA	NA		NA	NA	NA	ENST00000570843,gene_biotype:lincRNA,gene_symbol:RP11-473M20
CCCCGGCTAGCTCAGTCGGTAGAGCATGAGACC	lincRNA					human	NA	NA		NA	NA	NA	ENST00000570843,gene_biotype:lincRNA,gene_symbol:RP11-473M20
CCCCGGCTAGCTCAGTCGGTAGAGCATGAGAT	lincRNA					human	NA	NA		NA	NA	NA	ENST00000570843,gene_biotype:lincRNA,gene_symbol:RP11-473M20
CCCCGGCTAGCTCAGTTGGTAGAGCATGAGACC	lincRNA					human	NA	NA		NA	NA	NA	ENST00000570843,gene_biotype:lincRNA,gene_symbol:RP11-473M20
CCCCTGGTGGTCTAGTGGCTAGGATTCGGA	lincRNA					human	NA	NA		NA	NA	NA	ENST00000415386,gene_biotype:lincRNA,gene_symbol:RP5-875O13
CCCCTGGTGGTCTAGTGGCTAGGATTCGGCA	lincRNA					human	NA	NA		NA	NA	NA	ENST00000415386,gene_biotype:lincRNA,gene_symbol:RP5-875O13
CCCCTGGTGGTCTAGTGGCTAGGATTCGGCGCA	lincRNA					human	NA	NA		NA	NA	NA	ENST00000415386,gene_biotype:lincRNA,gene_symbol:RP5-875O13
CCCCTGGTGGTCTAGTGGCTAGGATTCGGCGCC	lincRNA					human	NA	NA		NA	NA	NA	ENST00000415386,gene_biotype:lincRNA,gene_symbol:RP5-875O13
CCCCTGGTGGTCTAGTGGCTAGGATTCGGCGCTC	lincRNA					human	NA	NA		NA	NA	NA	ENST00000415386,gene_biotype:lincRNA,gene_symbol:RP5-875O13
CCCCTGGTGGTCTAGTGGCTAGGATTCGGCGCTTC	lincRNA					human	NA	NA		NA	NA	NA	ENST00000415386,gene_biotype:lincRNA,gene_symbol:RP5-875O13
CCCCTGGTGGTCTAGTGGCTAGGATTCGGCGT	lincRNA					human	NA	NA		NA	NA	NA	ENST00000415386,gene_biotype:lincRNA,gene_symbol:RP5-875O13
CCCCTGGTGGTCTAGTGGCTAGGATTCGGT	lincRNA					human	NA	NA		NA	NA	NA	ENST00000415386,gene_biotype:lincRNA,gene_symbol:RP5-875O13
CCCCTGGTGGTCTAGTGGTTAGGATTCGGCGCTT	lincRNA					human	NA	NA		NA	NA	NA	ENST00000415386,gene_biotype:lincRNA,gene_symbol:RP5-875O13
CCCGACTAGCTCAGTCGGTAGAGCATGAGAC	lincRNA					human	NA	NA		NA	NA	NA	ENST00000570843,gene_biotype:lincRNA,gene_symbol:RP11-473M20
CCCGACTAGCTCAGTCGGTAGAGCATGAGACT	lincRNA					human	NA	NA		NA	NA	NA	ENST00000570843,gene_biotype:lincRNA,gene_symbol:RP11-473M20
CCCGGCTAACTCAGTCGGTAGAGCATGAGAC	lincRNA					human	NA	NA		NA	NA	NA	ENST00000570843,gene_biotype:lincRNA,gene_symbol:RP11-473M20
CCCGGCTAACTCAGTCGGTAGAGCATGAGACT	lincRNA					human	NA	NA		NA	NA	NA	ENST00000570843,gene_biotype:lincRNA,gene_symbol:RP11-473M20
CCCTGGTCTAGTGGCTAGGATTCGGCGCT	lincRNA					human	NA	NA		NA	NA	NA	ENST00000415386,gene_biotype:lincRNA,gene_symbol:RP5-875O13
CCTGGACTTGGAGTCAGA	lincRNA					human	NA	NA		NA	NA	NA	ENST00000580636,gene_biotype:lincRNA,gene_symbol:MIR378D2
CCTGGACTTGGAGTCAGAA	lincRNA					human	NA	NA		NA	NA	NA	ENST00000580636,gene_biotype:lincRNA,gene_symbol:MIR378D2
CCTTCAATAGCTCAGCTGGTAGAGC	lincRNA					human	NA	NA		NA	NA	NA	ENST00000517961,gene_biotype:lincRNA,gene_symbol:AC084082
CCTTCGATAACTCAGCTGGTAGAGC	lincRNA					human	NA	NA		NA	NA	NA	ENST00000517961,gene_biotype:lincRNA,gene_symbol:AC084082
CCTTCGATAGCTCAGCTGGCAGAGC	lincRNA					human	NA	NA		NA	NA	NA	ENST00000517961,gene_biotype:lincRNA,gene_symbol:AC084082
CCTTTGGTTATCTAGCTGTATG	lincRNA					human	NA	NA		NA	NA	NA	ENST00000384838,gene_biotype:lincRNA,gene_symbol:LINC00461
CGAGATGAAGCACTGTAGCTC	lincRNA					human	NA	NA		NA	NA	NA	ENST00000385300,gene_biotype:lincRNA,gene_symbol:CARMN
CGAGGTAGTAGGTTGTAT	lincRNA					human	NA	NA		NA	NA	NA	ENST00000360737,gene_biotype:lincRNA,gene_symbol:MIRLET7BHG
CGAGGTAGTAGGTTGTATAG	lincRNA					human	NA	NA		NA	NA	NA	ENST00000360737,gene_biotype:lincRNA,gene_symbol:MIRLET7BHG
CGAGGTAGTAGGTTGTATAGC	lincRNA					human	NA	NA		NA	NA	NA	ENST00000360737,gene_biotype:lincRNA,gene_symbol:MIRLET7BHG
CGAGGTAGTAGGTTGTATAGT	lincRNA					human	NA	NA		NA	NA	NA	ENST00000360737,gene_biotype:lincRNA,gene_symbol:MIRLET7BHG
CGAGGTAGTAGGTTGTATAGTC	lincRNA					human	NA	NA		NA	NA	NA	ENST00000360737,gene_biotype:lincRNA,gene_symbol:MIRLET7BHG
CGAGGTAGTAGGTTGTATAGTT	lincRNA					human	NA	NA		NA	NA	NA	ENST00000360737,gene_biotype:lincRNA,gene_symbol:MIRLET7BHG
CGAGGTAGTAGGTTGTATAGTTT	lincRNA					human	NA	NA		NA	NA	NA	ENST00000360737,gene_biotype:lincRNA,gene_symbol:MIRLET7BHG
CGAGGTAGTAGGTTGTGTGGT	lincRNA					human	NA	NA		NA	NA	NA	ENST00000360737,gene_biotype:lincRNA,gene_symbol:MIRLET7BHG
CGAGGTAGTAGGTTGTGTGGTC	lincRNA					human	NA	NA		NA	NA	NA	ENST00000360737,gene_biotype:lincRNA,gene_symbol:MIRLET7BHG
CGAGGTAGTAGGTTGTGTGGTT	lincRNA					human	NA	NA		NA	NA	NA	ENST00000360737,gene_biotype:lincRNA,gene_symbol:MIRLET7BHG
CGAGGTAGTAGGTTGTGTGGTTT	lincRNA					human	NA	NA		NA	NA	NA	ENST00000360737,gene_biotype:lincRNA,gene_symbol:MIRLET7BHG
CGCACCCTTCGATAGCTCAGCTGGTAGAGCGGAGGACTGTA	lincRNA					human	NA	NA		NA	NA	NA	ENST00000517961,gene_biotype:lincRNA,gene_symbol:AC084082
CGCTCGTTCGTCTAGGGGTATGATT	lincRNA					human	NA	NA		NA	NA	NA	ENST00000315707,gene_biotype:lincRNA,gene_symbol:LINC00324
CGCTCGTTGGTCTAGGGGTATGATC	lincRNA					human	NA	NA		NA	NA	NA	ENST00000315707,gene_biotype:lincRNA,gene_symbol:LINC00324
CGGAGTGTGACAATGGTGTTT	lincRNA					human	NA	NA		NA	NA	NA	ENST00000385044,gene_biotype:lincRNA,gene_symbol:MIR122
CGGAGTGTGACAATGGTGTTTG	lincRNA					human	NA	NA		NA	NA	NA	ENST00000385044,gene_biotype:lincRNA,gene_symbol:MIR122
CGGAGTGTGACAATGGTGTTTGA	lincRNA					human	NA	NA		NA	NA	NA	ENST00000385044,gene_biotype:lincRNA,gene_symbol:MIR122
CGGAGTGTGACAATGGTGTTTGT	lincRNA					human	NA	NA		NA	NA	NA	ENST00000385044,gene_biotype:lincRNA,gene_symbol:MIR122
CGGCTCAGTTCAGCAGGAAC	lincRNA					human	NA	NA		NA	NA	NA	ENST00000386972,gene_biotype:lincRNA,gene_symbol:MIR24-2
CGGCTCAGTTCAGCAGGAACAG	lincRNA					human	NA	NA		NA	NA	NA	ENST00000386972,gene_biotype:lincRNA,gene_symbol:MIR24-2
CGGGGCTCATTCTCAGCACGGCTG	lincRNA					human	NA	NA		NA	NA	NA	ENST00000602361,gene_biotype:lincRNA,gene_symbol:RMRP
CGGGGCTCATTCTCAGCACGGCTGA	lincRNA					human	NA	NA		NA	NA	NA	ENST00000602361,gene_biotype:lincRNA,gene_symbol:RMRP
CTCTGGCTCTGTGGCGCAATGGATAGCGCATT	lincRNA					human	NA	NA		NA	NA	NA	ENST00000565336,gene_biotype:lincRNA,gene_symbol:RP4-561L24
GAAAACGTGAGGCGCTGCTAT	lincRNA					human	NA	NA		NA	NA	NA	ENST00000362227,gene_biotype:lincRNA,gene_symbol:MIR503HG
GAAAAGAACTTTGAAGAC	lincRNA					human	NA	NA		NA	NA	NA	ENST00000589566,gene_biotype:lincRNA,gene_symbol:LINC01255
GAGCTGCCAGTTGAAGAACTGA	lincRNA					human	NA	NA		NA	NA	NA	ENST00000334146,gene_biotype:lincRNA,gene_symbol:MIR22HG
GAGCTGCCAGTTGAAGAACTGC	lincRNA					human	NA	NA		NA	NA	NA	ENST00000334146,gene_biotype:lincRNA,gene_symbol:MIR22HG
GAGCTGCCAGTTGAAGAACTGT	lincRNA					human	NA	NA		NA	NA	NA	ENST00000334146,gene_biotype:lincRNA,gene_symbol:MIR22HG
GCACCCTTCGATAGCTCAGCTGGTAGAGCGGAGGACTGTA	lincRNA					human	NA	NA		NA	NA	NA	ENST00000517961,gene_biotype:lincRNA,gene_symbol:AC084082
GCACCCTTCGATAGCTCAGCTGGTAGAGTGGAGGACTGTA	lincRNA					human	NA	NA		NA	NA	NA	ENST00000517961,gene_biotype:lincRNA,gene_symbol:AC084082
GCACGGGGCTCATTCTCAGCACGGCTGA	lincRNA					human	NA	NA		NA	NA	NA	ENST00000602361,gene_biotype:lincRNA,gene_symbol:RMRP
GCCCGACTAGCTCAGTCGGTAGAGCATG	lincRNA					human	NA	NA		NA	NA	NA	ENST00000570843,gene_biotype:lincRNA,gene_symbol:RP11-473M20
GCCCGACTAGCTCAGTCGGTAGAGCATGAG	lincRNA					human	NA	NA		NA	NA	NA	ENST00000570843,gene_biotype:lincRNA,gene_symbol:RP11-473M20
GCCCGACTAGCTCAGTCGGTAGAGCATGAGA	lincRNA					human	NA	NA		NA	NA	NA	ENST00000570843,gene_biotype:lincRNA,gene_symbol:RP11-473M20
GCCCGACTAGCTCAGTCGGTAGAGCATGAGAC	lincRNA					human	NA	NA		NA	NA	NA	ENST00000570843,gene_biotype:lincRNA,gene_symbol:RP11-473M20
GCCCGACTAGCTCAGTCGGTAGAGCATGAGACC	lincRNA					human	NA	NA		NA	NA	NA	ENST00000570843,gene_biotype:lincRNA,gene_symbol:RP11-473M20
GCCCGACTAGCTCAGTCGGTAGAGCATGAGACT	lincRNA					human	NA	NA		NA	NA	NA	ENST00000570843,gene_biotype:lincRNA,gene_symbol:RP11-473M20
GCCCGACTAGCTCAGTCGGTAGAGCATGAGACTC	lincRNA					human	NA	NA		NA	NA	NA	ENST00000570843,gene_biotype:lincRNA,gene_symbol:RP11-473M20
GCCCGACTAGCTCAGTCGGTAGAGCATGAGAT	lincRNA					human	NA	NA		NA	NA	NA	ENST00000570843,gene_biotype:lincRNA,gene_symbol:RP11-473M20
GCCCGGCCAGCTCAGTCGGTAGAGCATGAGAC	lincRNA					human	NA	NA		NA	NA	NA	ENST00000570843,gene_biotype:lincRNA,gene_symbol:RP11-473M20
GCCCGGCCAGCTCAGTCGGTAGAGCATGAGACT	lincRNA					human	NA	NA		NA	NA	NA	ENST00000570843,gene_biotype:lincRNA,gene_symbol:RP11-473M20
GCCCGGCTAACTCAGTCGGTAGAGCATG	lincRNA					human	NA	NA		NA	NA	NA	ENST00000570843,gene_biotype:lincRNA,gene_symbol:RP11-473M20
GCCCGGCTAACTCAGTCGGTAGAGCATGAG	lincRNA					human	NA	NA		NA	NA	NA	ENST00000570843,gene_biotype:lincRNA,gene_symbol:RP11-473M20
GCCCGGCTAACTCAGTCGGTAGAGCATGAGA	lincRNA					human	NA	NA		NA	NA	NA	ENST00000570843,gene_biotype:lincRNA,gene_symbol:RP11-473M20
GCCCGGCTAACTCAGTCGGTAGAGCATGAGAC	lincRNA					human	NA	NA		NA	NA	NA	ENST00000570843,gene_biotype:lincRNA,gene_symbol:RP11-473M20
GCCCGGCTAACTCAGTCGGTAGAGCATGAGACC	lincRNA					human	NA	NA		NA	NA	NA	ENST00000570843,gene_biotype:lincRNA,gene_symbol:RP11-473M20
GCCCGGCTAACTCAGTCGGTAGAGCATGAGACT	lincRNA					human	NA	NA		NA	NA	NA	ENST00000570843,gene_biotype:lincRNA,gene_symbol:RP11-473M20
GCCCGGCTAACTCAGTCGGTAGAGCATGAGACTC	lincRNA					human	NA	NA		NA	NA	NA	ENST00000570843,gene_biotype:lincRNA,gene_symbol:RP11-473M20
GCCCGGCTAACTCAGTCGGTAGAGCATGAGAT	lincRNA					human	NA	NA		NA	NA	NA	ENST00000570843,gene_biotype:lincRNA,gene_symbol:RP11-473M20
GCCCGGCTAGCCCAGTCGGTAGAGCATGAGAC	lincRNA					human	NA	NA		NA	NA	NA	ENST00000570843,gene_biotype:lincRNA,gene_symbol:RP11-473M20
GCCCGGCTAGCCCAGTCGGTAGAGCATGAGACT	lincRNA					human	NA	NA		NA	NA	NA	ENST00000570843,gene_biotype:lincRNA,gene_symbol:RP11-473M20
GCCCGGCTAGCTCAGCCGGTAGAGCATGAGAC	lincRNA					human	NA	NA		NA	NA	NA	ENST00000570843,gene_biotype:lincRNA,gene_symbol:RP11-473M20
GCCCGGCTAGCTCAGCCGGTAGAGCATGAGACT	lincRNA					human	NA	NA		NA	NA	NA	ENST00000570843,gene_biotype:lincRNA,gene_symbol:RP11-473M20
GCCCGGCTAGCTCAGTCGGCAGAGCATGAGAC	lincRNA					human	NA	NA		NA	NA	NA	ENST00000570843,gene_biotype:lincRNA,gene_symbol:RP11-473M20
GCCCGGCTAGCTCAGTCGGCAGAGCATGAGACT	lincRNA					human	NA	NA		NA	NA	NA	ENST00000570843,gene_biotype:lincRNA,gene_symbol:RP11-473M20
GCCCGGCTAGCTCAGTCGGTAGAGCACGAGAC	lincRNA					human	NA	NA		NA	NA	NA	ENST00000570843,gene_biotype:lincRNA,gene_symbol:RP11-473M20
GCCCGGCTAGCTCAGTCGGTAGAGCACGAGACT	lincRNA					human	NA	NA		NA	NA	NA	ENST00000570843,gene_biotype:lincRNA,gene_symbol:RP11-473M20
GCCCGGCTAGCTCAGTCGGTAGAGCATGAGGC	lincRNA					human	NA	NA		NA	NA	NA	ENST00000570843,gene_biotype:lincRNA,gene_symbol:RP11-473M20
GCCCGGCTAGCTCAGTCGGTAGAGCATGAGGCT	lincRNA					human	NA	NA		NA	NA	NA	ENST00000570843,gene_biotype:lincRNA,gene_symbol:RP11-473M20
GCCCGGCTAGCTCAGTCGGTAGAGCGTGAGAC	lincRNA					human	NA	NA		NA	NA	NA	ENST00000570843,gene_biotype:lincRNA,gene_symbol:RP11-473M20
GCCCGGCTAGCTCAGTCGGTAGAGCGTGAGACT	lincRNA					human	NA	NA		NA	NA	NA	ENST00000570843,gene_biotype:lincRNA,gene_symbol:RP11-473M20
GCCCGGCTAGCTCAGTCGGTAGGGCATGAGAC	lincRNA					human	NA	NA		NA	NA	NA	ENST00000570843,gene_biotype:lincRNA,gene_symbol:RP11-473M20
GCCCGGCTAGCTCAGTCGGTAGGGCATGAGACT	lincRNA					human	NA	NA		NA	NA	NA	ENST00000570843,gene_biotype:lincRNA,gene_symbol:RP11-473M20
GCCCGGCTAGCTCAGTCGGTGGAGCATGAGAC	lincRNA					human	NA	NA		NA	NA	NA	ENST00000570843,gene_biotype:lincRNA,gene_symbol:RP11-473M20
GCCCGGCTAGCTCGGTCGGTAGAGCATGAGAC	lincRNA					human	NA	NA		NA	NA	NA	ENST00000570843,gene_biotype:lincRNA,gene_symbol:RP11-473M20
GCCCGGCTAGCTCGGTCGGTAGAGCATGAGACT	lincRNA					human	NA	NA		NA	NA	NA	ENST00000570843,gene_biotype:lincRNA,gene_symbol:RP11-473M20
GCCCGGCTGGCTCAGTCGGTAGAGCATGAGAC	lincRNA					human	NA	NA		NA	NA	NA	ENST00000570843,gene_biotype:lincRNA,gene_symbol:RP11-473M20
GCCCGGCTGGCTCAGTCGGTAGAGCATGAGACT	lincRNA					human	NA	NA		NA	NA	NA	ENST00000570843,gene_biotype:lincRNA,gene_symbol:RP11-473M20
GCCCGTCTAGCTCAGTCGGTAGAGCATGAGAC	lincRNA					human	NA	NA		NA	NA	NA	ENST00000570843,gene_biotype:lincRNA,gene_symbol:RP11-473M20
GCCCGTCTAGCTCAGTCGGTAGAGCATGAGACT	lincRNA					human	NA	NA		NA	NA	NA	ENST00000570843,gene_biotype:lincRNA,gene_symbol:RP11-473M20
GCCCTGGTGGTCTAGTGGCTAGGATTCGGA	lincRNA					human	NA	NA		NA	NA	NA	ENST00000415386,gene_biotype:lincRNA,gene_symbol:RP5-875O13
GCCCTGGTGGTCTAGTGGCTAGGATTCGGCA	lincRNA					human	NA	NA		NA	NA	NA	ENST00000415386,gene_biotype:lincRNA,gene_symbol:RP5-875O13
GCCCTGGTGGTCTAGTGGCTAGGATTCGGCGCC	lincRNA					human	NA	NA		NA	NA	NA	ENST00000415386,gene_biotype:lincRNA,gene_symbol:RP5-875O13
GCCCTGGTGGTCTAGTGGCTAGGATTCGGCGCTC	lincRNA					human	NA	NA		NA	NA	NA	ENST00000415386,gene_biotype:lincRNA,gene_symbol:RP5-875O13
GCCCTGGTGGTCTAGTGGCTAGGATTCGGCGT	lincRNA					human	NA	NA		NA	NA	NA	ENST00000415386,gene_biotype:lincRNA,gene_symbol:RP5-875O13
GCCCTGGTGGTCTAGTGGCTAGGATTCGGT	lincRNA					human	NA	NA		NA	NA	NA	ENST00000415386,gene_biotype:lincRNA,gene_symbol:RP5-875O13
GCCCTGGTGGTCTAGTGGTTAGGATTCGGCGCTT	lincRNA					human	NA	NA		NA	NA	NA	ENST00000415386,gene_biotype:lincRNA,gene_symbol:RP5-875O13
GCTCACATGGGCTGTGC	lincRNA					human	NA	NA		NA	NA	NA	ENST00000567533,gene_biotype:lincRNA,gene_symbol:RP11-90P13
GCTCGTTCGTCTAGGGGTATGATT	lincRNA					human	NA	NA		NA	NA	NA	ENST00000315707,gene_biotype:lincRNA,gene_symbol:LINC00324
GCTGGACTTGGAGTCAGA	lincRNA					human	NA	NA		NA	NA	NA	ENST00000580636,gene_biotype:lincRNA,gene_symbol:MIR378D2
GCTGGACTTGGAGTCAGAA	lincRNA					human	NA	NA		NA	NA	NA	ENST00000580636,gene_biotype:lincRNA,gene_symbol:MIR378D2
GCTTCGATAGCTCAGCTGGTAGAGT	lincRNA					human	NA	NA		NA	NA	NA	ENST00000517961,gene_biotype:lincRNA,gene_symbol:AC084082
GCTTGGTCTAGGGGTATGATT	lincRNA					human	NA	NA		NA	NA	NA	ENST00000315707,gene_biotype:lincRNA,gene_symbol:LINC00324
GCTTGGTCTAGGGGTATGATTCTCGC	lincRNA					human	NA	NA		NA	NA	NA	ENST00000315707,gene_biotype:lincRNA,gene_symbol:LINC00324
GCTTGGTCTAGGGGTATGATTCTCGCT	lincRNA					human	NA	NA		NA	NA	NA	ENST00000315707,gene_biotype:lincRNA,gene_symbol:LINC00324
GCTTGGTCTAGGGGTATGATTCTCGCTT	lincRNA					human	NA	NA		NA	NA	NA	ENST00000315707,gene_biotype:lincRNA,gene_symbol:LINC00324
GCTTGGTCTAGGGGTATGATTCTCGCTTC	lincRNA					human	NA	NA		NA	NA	NA	ENST00000315707,gene_biotype:lincRNA,gene_symbol:LINC00324
GCTTGGTCTAGGGGTATGATTCTCGCTTT	lincRNA					human	NA	NA		NA	NA	NA	ENST00000315707,gene_biotype:lincRNA,gene_symbol:LINC00324
GCTTTGGTTATCTAGCTGTATG	lincRNA					human	NA	NA		NA	NA	NA	ENST00000384838,gene_biotype:lincRNA,gene_symbol:LINC00461
GGAGGTAGTAGGTTGTAT	lincRNA					human	NA	NA		NA	NA	NA	ENST00000360737,gene_biotype:lincRNA,gene_symbol:MIRLET7BHG
GGAGGTAGTAGGTTGTATAGT	lincRNA					human	NA	NA		NA	NA	NA	ENST00000360737,gene_biotype:lincRNA,gene_symbol:MIRLET7BHG
GGAGGTAGTAGGTTGTATAGTC	lincRNA					human	NA	NA		NA	NA	NA	ENST00000360737,gene_biotype:lincRNA,gene_symbol:MIRLET7BHG
GGAGGTAGTAGGTTGTATAGTT	lincRNA					human	NA	NA		NA	NA	NA	ENST00000360737,gene_biotype:lincRNA,gene_symbol:MIRLET7BHG
GGAGGTAGTAGGTTGTATAGTTT	lincRNA					human	NA	NA		NA	NA	NA	ENST00000360737,gene_biotype:lincRNA,gene_symbol:MIRLET7BHG
GGAGGTAGTAGGTTGTGTGGT	lincRNA					human	NA	NA		NA	NA	NA	ENST00000360737,gene_biotype:lincRNA,gene_symbol:MIRLET7BHG
GGAGGTAGTAGGTTGTGTGGTT	lincRNA					human	NA	NA		NA	NA	NA	ENST00000360737,gene_biotype:lincRNA,gene_symbol:MIRLET7BHG
GGAGGTAGTAGGTTGTGTGGTTT	lincRNA					human	NA	NA		NA	NA	NA	ENST00000360737,gene_biotype:lincRNA,gene_symbol:MIRLET7BHG
GGCTCGTTAGTCTAGGGGTATGATT	lincRNA					human	NA	NA		NA	NA	NA	ENST00000315707,gene_biotype:lincRNA,gene_symbol:LINC00324
GGCTCGTTCGTCTAGGGGTATGATC	lincRNA					human	NA	NA		NA	NA	NA	ENST00000315707,gene_biotype:lincRNA,gene_symbol:LINC00324
GGCTCGTTCGTCTAGGGGTATGATT	lincRNA					human	NA	NA		NA	NA	NA	ENST00000315707,gene_biotype:lincRNA,gene_symbol:LINC00324
GGCTCGTTCGTCTAGGGGTATGATTCTCGC	lincRNA					human	NA	NA		NA	NA	NA	ENST00000315707,gene_biotype:lincRNA,gene_symbol:LINC00324
GGCTCGTTCGTCTAGGGGTATGATTCTCGCTT	lincRNA					human	NA	NA		NA	NA	NA	ENST00000315707,gene_biotype:lincRNA,gene_symbol:LINC00324
GGCTCGTTCGTCTAGGGGTATGATTCTCGCTTC	lincRNA					human	NA	NA		NA	NA	NA	ENST00000315707,gene_biotype:lincRNA,gene_symbol:LINC00324
GGCTCGTTCGTCTAGGGGTATGATTCTCGCTTT	lincRNA					human	NA	NA		NA	NA	NA	ENST00000315707,gene_biotype:lincRNA,gene_symbol:LINC00324
GGCTCGTTGGTCTAGGGGTATGATTCTCGGTT	lincRNA					human	NA	NA		NA	NA	NA	ENST00000315707,gene_biotype:lincRNA,gene_symbol:LINC00324
GGCTCTGTGGCGCAATGGATAGCGCATTGGACTTCTAGAT	lincRNA					human	NA	NA		NA	NA	NA	ENST00000565336,gene_biotype:lincRNA,gene_symbol:RP4-561L24
GGCTCTTTGGTCTAGGGGTATGATT	lincRNA					human	NA	NA		NA	NA	NA	ENST00000315707,gene_biotype:lincRNA,gene_symbol:LINC00324
GGCTTGGTCTAGGGGTATGATTCTCGCTT	lincRNA					human	NA	NA		NA	NA	NA	ENST00000315707,gene_biotype:lincRNA,gene_symbol:LINC00324
GGCTTGGTCTAGGGGTATGATTCTCGCTTC	lincRNA					human	NA	NA		NA	NA	NA	ENST00000315707,gene_biotype:lincRNA,gene_symbol:LINC00324
GGGAGTGTGACAATGGTGTTT	lincRNA					human	NA	NA		NA	NA	NA	ENST00000385044,gene_biotype:lincRNA,gene_symbol:MIR122
GGGAGTGTGACAATGGTGTTTG	lincRNA					human	NA	NA		NA	NA	NA	ENST00000385044,gene_biotype:lincRNA,gene_symbol:MIR122
GGGAGTGTGACAATGGTGTTTGA	lincRNA					human	NA	NA		NA	NA	NA	ENST00000385044,gene_biotype:lincRNA,gene_symbol:MIR122
GGGAGTGTGACAATGGTGTTTGT	lincRNA					human	NA	NA		NA	NA	NA	ENST00000385044,gene_biotype:lincRNA,gene_symbol:MIR122
GGGCTCAGTTCAGCAGGAAC	lincRNA					human	NA	NA		NA	NA	NA	ENST00000386972,gene_biotype:lincRNA,gene_symbol:MIR24-2
GGGGCTCATTCTCAGCACGGCTGA	lincRNA					human	NA	NA		NA	NA	NA	ENST00000602361,gene_biotype:lincRNA,gene_symbol:RMRP
GGTTTACTTTGAAAAAATT	lincRNA					human	NA	NA		NA	NA	NA	ENST00000415338,gene_biotype:lincRNA,gene_symbol:RP5-998N21
GTCTGGCTCTGTGGCGCAATGGATAGCGCATT	lincRNA					human	NA	NA		NA	NA	NA	ENST00000565336,gene_biotype:lincRNA,gene_symbol:RP4-561L24
GTTTACTTTGAAAAAATC	lincRNA					human	NA	NA		NA	NA	NA	ENST00000415338,gene_biotype:lincRNA,gene_symbol:RP5-998N21
TAAAACGTGAGGCGCTGCTAT	lincRNA					human	NA	NA		NA	NA	NA	ENST00000362227,gene_biotype:lincRNA,gene_symbol:MIR503HG
TAGCTGCCAGTTGAAGAACTGA	lincRNA					human	NA	NA		NA	NA	NA	ENST00000334146,gene_biotype:lincRNA,gene_symbol:MIR22HG
TAGCTGCCAGTTGAAGAACTGC	lincRNA					human	NA	NA		NA	NA	NA	ENST00000334146,gene_biotype:lincRNA,gene_symbol:MIR22HG
TAGCTGCCAGTTGAAGAACTGT	lincRNA					human	NA	NA		NA	NA	NA	ENST00000334146,gene_biotype:lincRNA,gene_symbol:MIR22HG
TAGTGGCTAGGATTCGGT	lincRNA					human	NA	NA		NA	NA	NA	ENST00000415386,gene_biotype:lincRNA,gene_symbol:RP5-875O13
TCACGGGGCTCATTCTCAGCACGGCTGA	lincRNA					human	NA	NA		NA	NA	NA	ENST00000602361,gene_biotype:lincRNA,gene_symbol:RMRP
TCAGGCTCTGTGGCGCAATGGATAGCGCATT	lincRNA					human	NA	NA		NA	NA	NA	ENST00000565336,gene_biotype:lincRNA,gene_symbol:RP4-561L24
TCAGGCTCTGTGGCGCAATGGATAGCGCATTGGACT	lincRNA					human	NA	NA		NA	NA	NA	ENST00000565336,gene_biotype:lincRNA,gene_symbol:RP4-561L24
TCCCCGGTGGTCTAGTGGCTAGGATTCGGC	lincRNA					human	NA	NA		NA	NA	NA	ENST00000415386,gene_biotype:lincRNA,gene_symbol:RP5-875O13
TCCCGGCTAGCTCAGTCGGTAGAGCATGAGACA	lincRNA					human	NA	NA		NA	NA	NA	ENST00000570843,gene_biotype:lincRNA,gene_symbol:RP11-473M20
TCCCGGCTAGCTCAGTCGGTAGAGCATGAGACC	lincRNA					human	NA	NA		NA	NA	NA	ENST00000570843,gene_biotype:lincRNA,gene_symbol:RP11-473M20
TCCCGGCTAGCTCAGTCGGTAGAGCATGAGAT	lincRNA					human	NA	NA		NA	NA	NA	ENST00000570843,gene_biotype:lincRNA,gene_symbol:RP11-473M20
TCCCGGCTAGCTCAGTTGGTAGAGCATGAGACC	lincRNA					human	NA	NA		NA	NA	NA	ENST00000570843,gene_biotype:lincRNA,gene_symbol:RP11-473M20
TCCCTAGTGGTCTAGTGGCTAGGATTCGGC	lincRNA					human	NA	NA		NA	NA	NA	ENST00000415386,gene_biotype:lincRNA,gene_symbol:RP5-875O13
TCCCTAGTGGTCTAGTGGCTAGGATTCGGCG	lincRNA					human	NA	NA		NA	NA	NA	ENST00000415386,gene_biotype:lincRNA,gene_symbol:RP5-875O13
TCCCTAGTGGTCTAGTGGCTAGGATTCGGCGCT	lincRNA					human	NA	NA		NA	NA	NA	ENST00000415386,gene_biotype:lincRNA,gene_symbol:RP5-875O13
TCCCTAGTGGTCTAGTGGCTAGGATTCGGCGCTT	lincRNA					human	NA	NA		NA	NA	NA	ENST00000415386,gene_biotype:lincRNA,gene_symbol:RP5-875O13
TCCCTAGTGGTCTAGTGGTTAGGATTCGGCGCTT	lincRNA					human	NA	NA		NA	NA	NA	ENST00000415386,gene_biotype:lincRNA,gene_symbol:RP5-875O13
TCCCTGGCGGTCTAGTGGCTAGGATTCGGC	lincRNA					human	NA	NA		NA	NA	NA	ENST00000415386,gene_biotype:lincRNA,gene_symbol:RP5-875O13
TCCCTGGTGGCCTAGTGGCTAGGATTCGGC	lincRNA					human	NA	NA		NA	NA	NA	ENST00000415386,gene_biotype:lincRNA,gene_symbol:RP5-875O13
TCCCTGGTGGCCTAGTGGCTAGGATTCGGCG	lincRNA					human	NA	NA		NA	NA	NA	ENST00000415386,gene_biotype:lincRNA,gene_symbol:RP5-875O13
TCCCTGGTGGTCCAGTGGCTAGGATTCGGC	lincRNA					human	NA	NA		NA	NA	NA	ENST00000415386,gene_biotype:lincRNA,gene_symbol:RP5-875O13
TCCCTGGTGGTCTAGTGGCCAGGATTCGGC	lincRNA					human	NA	NA		NA	NA	NA	ENST00000415386,gene_biotype:lincRNA,gene_symbol:RP5-875O13
TCCCTGGTGGTCTAGTGGCTAGGACTCGGC	lincRNA					human	NA	NA		NA	NA	NA	ENST00000415386,gene_biotype:lincRNA,gene_symbol:RP5-875O13
TCCCTGGTGGTCTAGTGGCTAGGATCCGGC	lincRNA					human	NA	NA		NA	NA	NA	ENST00000415386,gene_biotype:lincRNA,gene_symbol:RP5-875O13
TCCCTGGTGGTCTAGTGGCTAGGATTCGGCGCTCT	lincRNA					human	NA	NA		NA	NA	NA	ENST00000415386,gene_biotype:lincRNA,gene_symbol:RP5-875O13
TCCCTGGTGGTCTAGTGGCTAGGGTTCGGC	lincRNA					human	NA	NA		NA	NA	NA	ENST00000415386,gene_biotype:lincRNA,gene_symbol:RP5-875O13
TCCCTGGTGGTCTAGTGGCTGGGATTCGGC	lincRNA					human	NA	NA		NA	NA	NA	ENST00000415386,gene_biotype:lincRNA,gene_symbol:RP5-875O13
TCCCTGGTGGTCTAGTGGTAGGATTCGGC	lincRNA					human	NA	NA		NA	NA	NA	ENST00000415386,gene_biotype:lincRNA,gene_symbol:RP5-875O13
TCCCTGGTGGTCTAGTGGTAGGATTCGGCGCT	lincRNA					human	NA	NA		NA	NA	NA	ENST00000415386,gene_biotype:lincRNA,gene_symbol:RP5-875O13
TCCCTGGTGGTCTAGTGGTTAGGATTCGGCGCTTT	lincRNA					human	NA	NA		NA	NA	NA	ENST00000415386,gene_biotype:lincRNA,gene_symbol:RP5-875O13
TCCCTGGTGGTCTAGTGTTAGGATTCGGCGCTT	lincRNA					human	NA	NA		NA	NA	NA	ENST00000415386,gene_biotype:lincRNA,gene_symbol:RP5-875O13
TCCCTGGTGGTCTGGTGGCTAGGATTCGGC	lincRNA					human	NA	NA		NA	NA	NA	ENST00000415386,gene_biotype:lincRNA,gene_symbol:RP5-875O13
TCTGGCTCTGTGGCGCAATGGATAGCGCA	lincRNA					human	NA	NA		NA	NA	NA	ENST00000565336,gene_biotype:lincRNA,gene_symbol:RP4-561L24
TCTGGCTCTGTGGCGCAATGGATAGCGCATT	lincRNA					human	NA	NA		NA	NA	NA	ENST00000565336,gene_biotype:lincRNA,gene_symbol:RP4-561L24
TCTGGCTCTGTGGCGCAATGGATAGCGCATTG	lincRNA					human	NA	NA		NA	NA	NA	ENST00000565336,gene_biotype:lincRNA,gene_symbol:RP4-561L24
TCTGGCTCTGTGGCGCAATGGATAGCGCATTGGACT	lincRNA					human	NA	NA		NA	NA	NA	ENST00000565336,gene_biotype:lincRNA,gene_symbol:RP4-561L24
TCTTCGATAGCTCAGCTGGTAGAGT	lincRNA					human	NA	NA		NA	NA	NA	ENST00000517961,gene_biotype:lincRNA,gene_symbol:AC084082
TCTTGGTCTAGGGGTATGATTCTCGCT	lincRNA					human	NA	NA		NA	NA	NA	ENST00000315707,gene_biotype:lincRNA,gene_symbol:LINC00324
TCTTGGTCTAGGGGTATGATTCTCGCTT	lincRNA					human	NA	NA		NA	NA	NA	ENST00000315707,gene_biotype:lincRNA,gene_symbol:LINC00324
TGAGAAGAACTTTGAAAAGAG	lincRNA					human	NA	NA		NA	NA	NA	ENST00000569557,gene_biotype:lincRNA,gene_symbol:RP11-488I20
TGAGGTAGTAGGTCGTATAGTT	lincRNA					human	NA	NA		NA	NA	NA	ENST00000360737,gene_biotype:lincRNA,gene_symbol:MIRLET7BHG
TGAGGTAGTAGGTTGCATAGTT	lincRNA					human	NA	NA		NA	NA	NA	ENST00000360737,gene_biotype:lincRNA,gene_symbol:MIRLET7BHG
TGCTCGTTGGTCTAGGGGTATGATC	lincRNA					human	NA	NA		NA	NA	NA	ENST00000315707,gene_biotype:lincRNA,gene_symbol:LINC00324
TGGAGTGTGACGATGGTGTTTG	lincRNA					human	NA	NA		NA	NA	NA	ENST00000385044,gene_biotype:lincRNA,gene_symbol:MIR122
TGGAGTGTGGCAATGGTGTTTG	lincRNA					human	NA	NA		NA	NA	NA	ENST00000385044,gene_biotype:lincRNA,gene_symbol:MIR122
TGGCTCTGTGGCGCAATGGATAGCGCATC	lincRNA					human	NA	NA		NA	NA	NA	ENST00000565336,gene_biotype:lincRNA,gene_symbol:RP4-561L24
TGGCTCTGTGGCGCAATGGATAGCGCATTGGACTTCTAGAT	lincRNA					human	NA	NA		NA	NA	NA	ENST00000565336,gene_biotype:lincRNA,gene_symbol:RP4-561L24
TGTTTACTTTGAAAAAATT	lincRNA					human	NA	NA		NA	NA	NA	ENST00000415338,gene_biotype:lincRNA,gene_symbol:RP5-998N21
TTCTGGCTCTGTGGCGCAATGGATAGCGCATT	lincRNA					human	NA	NA		NA	NA	NA	ENST00000565336,gene_biotype:lincRNA,gene_symbol:RP4-561L24
CACAGTGAACCGGTCTCTTA	miRNA	ssc-miR-128	mature	known	non-templated	pig	ssc-miR-128	NA	NA	NA	NA	NA	NA
CACAGTGAACCGGTCTCTTC	miRNA	ssc-miR-128	mature	known	non-templated	pig	ssc-miR-128	NA	NA	NA	NA	NA	NA
CACAGTGAACCGGTCTCTTG	miRNA	ssc-miR-128	mature	known	non-templated	pig	ssc-miR-128	NA	NA	NA	NA	NA	NA
CACAGTGAACCGGTCTCTTTA	miRNA	ssc-miR-128	mature	known	non-templated	pig	ssc-miR-128	NA	NA	NA	NA	NA	NA
CACAGTGAACCGGTCTCTTTG	miRNA	ssc-miR-128	mature	known	non-templated	pig	ssc-miR-128	NA	NA	NA	NA	NA	NA
TCACAGTGAACCGGTCTCTC	miRNA	ssc-miR-128	mature	known	non-templated	pig	ssc-miR-128	NA	NA	NA	NA	NA	NA
TCACAGTGAACCGGTCTCTTA	miRNA	ssc-miR-128	mature	known	non-templated	pig	ssc-miR-128	NA	NA	NA	NA	NA	NA
TCACAGTGAACCGGTCTCTTAA	miRNA	ssc-miR-128	mature	known	non-templated	pig	ssc-miR-128	NA	NA	NA	NA	NA	NA
TCACAGTGAACCGGTCTCTTAT	miRNA	ssc-miR-128	mature	known	non-templated	pig	ssc-miR-128	NA	NA	NA	NA	NA	NA
TCACAGTGAACCGGTCTCTTC	miRNA	ssc-miR-128	mature	known	non-templated	pig	ssc-miR-128	NA	NA	NA	NA	NA	NA
TCACAGTGAACCGGTCTCTTG	miRNA	ssc-miR-128	mature	known	non-templated	pig	ssc-miR-128	NA	NA	NA	NA	NA	NA
AAAAGCTGGGTTGAGAGGGCGAAAT	miRNA	ssc-miR-320	mature	known	non-templated	pig	ssc-miR-320	NA		NA	NA	NA	NA
AAAAGCTGGGTTGAGAGGGCGAAC	miRNA	ssc-miR-320	mature	known	non-templated	pig	ssc-miR-320	NA		NA	NA	NA	NA
AAAAGCTGGGTTGAGAGGGCGAAG	miRNA	ssc-miR-320	mature	known	non-templated	pig	ssc-miR-320	NA		NA	NA	NA	NA
AAAAGCTGGGTTGAGAGGGCGAAT	miRNA	ssc-miR-320	mature	known	non-templated	pig	ssc-miR-320	NA		NA	NA	NA	NA
AAAAGCTGGGTTGAGAGGGCGAC	miRNA	ssc-miR-320	mature	known	non-templated	pig	ssc-miR-320	NA		NA	NA	NA	NA
AAAAGCTGGGTTGAGAGGGCGAG	miRNA	ssc-miR-320	mature	known	non-templated	pig	ssc-miR-320	NA		NA	NA	NA	NA
AAAAGCTGGGTTGAGAGGGCGAT	miRNA	ssc-miR-320	mature	known	non-templated	pig	ssc-miR-320	NA		NA	NA	NA	NA
AAAAGCTGGGTTGAGAGGGCGATT	miRNA	ssc-miR-320	mature	known	non-templated	pig	ssc-miR-320	NA		NA	NA	NA	NA
AAAAGCTGGGTTGAGAGGGCGC	miRNA	ssc-miR-320	mature	known	non-templated	pig	ssc-miR-320	NA	NA	NA	NA	NA	NA
AAAAGCTGGGTTGAGAGGGCGG	miRNA	ssc-miR-320	mature	known	non-templated	pig	ssc-miR-320	NA	NA	NA	NA	NA	NA
AAAAGCTGGGTTGAGAGGGCGT	miRNA	ssc-miR-320	mature	known	non-templated	pig	ssc-miR-320	NA	NA	NA	NA	NA	NA
AAAAGTGCTTACAGTGCAGGTAGA	miRNA	ssc-miR-106a	mature	known	non-templated	pig	ssc-miR-106a	NA		NA	NA	NA	ENST00000384870,gene_biotype:processed_transcript,gene_symbol:MIR92A2
AAACCCGTAGATCCGATCTTGC	miRNA	ssc-miR-99a	mature	known	non-templated	pig	ssc-miR-99a	NA	NA	NA	NA	NA	NA
AAACGTGGATGTACTTGCTC	miRNA	hsa-miR-302a-5p	mature	novel	non-templated	human	hsa-miR-302a-5p	NA	NA	NA	NA	NA	NA
AAAGCTGGGTTGAGAGGGCGAAG	miRNA	ssc-miR-320	mature	known	non-templated	pig	ssc-miR-320	NA	NA	NA	NA	NA	NA
AAAGCTGGGTTGAGAGGGCGAAT	miRNA	ssc-miR-320	mature	known	non-templated	pig	ssc-miR-320	NA	NA	NA	NA	NA	NA
AAAGCTGGGTTGAGAGGGCGAT	miRNA	ssc-miR-320	mature	known	non-templated	pig	ssc-miR-320	NA	NA	NA	NA	NA	NA
AAAGCTGGGTTGAGAGGGCGT	miRNA	ssc-miR-320	mature	known	non-templated	pig	ssc-miR-320	NA	NA	NA	NA	NA	NA
AAAGTGCTGTTCGTGCAGGTAGA	miRNA	hsa-miR-93-5p	mature	novel	non-templated	human	hsa-miR-93-5p	NA	NA	NA	NA	NA	NA
AAAGTGCTTACAGTGCAGGTAA	miRNA	ssc-miR-106a	mature	known	non-templated	pig	ssc-miR-106a	NA		NA	NA	NA	ENST00000384870,gene_biotype:processed_transcript,gene_symbol:MIR92A2
AAAGTGCTTACAGTGCAGGTAGA	miRNA	ssc-miR-106a	mature	known	non-templated	pig	ssc-miR-106a	NA		NA	NA	NA	ENST00000384870,gene_biotype:processed_transcript,gene_symbol:MIR92A2
AAAGTGCTTATAGTGCAGGTAA	miRNA	ssc-miR-20a	mature	known	non-templated	pig	ssc-miR-20a	NA		NA	NA	NA	ENST00000362279,gene_biotype:processed_transcript,gene_symbol:MIR17HG
AAAGTGCTTATAGTGCAGGTAGA	miRNA	bta-miR-20a	mature	novel	non-templated	cattle	bta-miR-20a	NA		NA	NA	NA	ENST00000362279,gene_biotype:processed_transcript,gene_symbol:MIR17HG
AAAGTGCTTCCATGTTTTAGA	miRNA	bta-miR-302a	mature	novel	non-templated	cattle	bta-miR-302a	NA		NA	NA	NA	ENST00000362188,gene_biotype:antisense,gene_symbol:MIR302B
AAAGTGCTTCCATGTTTTAGC	miRNA	bta-miR-302a	mature	novel	non-templated	cattle	bta-miR-302a	NA		NA	NA	NA	ENST00000362188,gene_biotype:antisense,gene_symbol:MIR302B
AAAGTGCTTCCATGTTTTAGG	miRNA	bta-miR-302a	mature	novel	non-templated	cattle	bta-miR-302a	NA		NA	NA	NA	ENST00000362188,gene_biotype:antisense,gene_symbol:MIR302B
AAAGTGCTTCCATGTTTTAGTA	miRNA	bta-miR-302a	mature	novel	non-templated	cattle	bta-miR-302a	NA		NA	NA	NA	ENST00000362188,gene_biotype:antisense,gene_symbol:MIR302B
AAAGTGCTTCCATGTTTTAGTG	miRNA	bta-miR-302a	mature	novel	non-templated	cattle	bta-miR-302a	NA		NA	NA	NA	ENST00000362188,gene_biotype:antisense,gene_symbol:MIR302B
AAAGTGCTTCCATGTTTTAGTGA	miRNA	bta-miR-302a	mature	novel	non-templated	cattle	bta-miR-302a	NA		NA	NA	NA	NA
AAAGTGCTTCCATGTTTTAGTGAA	miRNA	bta-miR-302a	mature	novel	non-templated	cattle	bta-miR-302a	NA		NA	NA	NA	NA
AAAGTGCTTCCATGTTTTAGTGC	miRNA	bta-miR-302a	mature	novel	non-templated	cattle	bta-miR-302a	NA	NA	NA	NA	NA	NA
AAAGTGCTTCCATGTTTTAGTGG	miRNA	bta-miR-302a	mature	novel	non-templated	cattle	bta-miR-302a	NA	NA	NA	NA	NA	NA
AAAGTGCTTCCATGTTTTAGTGT	miRNA	bta-miR-302a	mature	novel	non-templated	cattle	bta-miR-302a	NA	NA	NA	NA	NA	NA
AAAGTTCTGAGACACTCCGACC	miRNA	ssc-miR-148a-5p	mature	known	non-templated	pig	ssc-miR-148a-5p	NA	NA	NA	NA	NA	NA
AAATCAGTATGAATAAAGTCGTGATACTGTAAACGCTTTCTGATG	miRNA	hsa-miR-3607-3p	mature	novel	non-templated	human	hsa-miR-3607-3p	NA		NA	NA	NA	NA
AAATCAGTATGAATAAAGTCGTGATACTGTAAACGCTTTCTGATGTA	miRNA	hsa-miR-3607-3p	mature	novel	non-templated	human	hsa-miR-3607-3p	NA		NA	NA	NA	NA
AAATGGATTTTTGGAGCC	miRNA	bta-miR-1246	mature	novel	non-templated	cattle	bta-miR-1246	NA		NA	NA	NA	ENST00000516795,gene_biotype:snRNA,gene_symbol:RNU2-44P
AAATGGATTTTTGGAGCT	miRNA	bta-miR-1246	mature	novel	non-templated	cattle	bta-miR-1246	NA		NA	NA	NA	ENST00000410144,gene_biotype:snRNA,gene_symbol:RNU2-3P
AAATGGATTTTTGGAGT	miRNA	bta-miR-1246	mature	novel	non-templated	cattle	bta-miR-1246	NA	NA	NA	NA	NA	NA
AACACTGTCTGGTAACGATGA	miRNA	bta-miR-200a	mature	novel	non-templated	cattle	bta-miR-200a	NA	NA	NA	NA	NA	NA
AACACTGTCTGGTAACGATGAT	miRNA	hsa-miR-200a-3p	mature	novel	non-templated	human	hsa-miR-200a-3p	NA	NA	NA	NA	NA	NA
AACACTGTCTGGTAACGATGC	miRNA	bta-miR-200a	mature	novel	non-templated	cattle	bta-miR-200a	NA	NA	NA	NA	NA	NA
AACACTGTCTGGTAACGATGCT	miRNA	hsa-miR-200a-3p	mature	novel	non-templated	human	hsa-miR-200a-3p	NA	NA	NA	NA	NA	NA
AACACTGTCTGGTAACGATGTA	miRNA	bta-miR-200a	mature	novel	non-templated	cattle	bta-miR-200a	NA	NA	NA	NA	NA	NA
AACACTGTCTGGTAACGATGTC	miRNA	bta-miR-200a	mature	novel	non-templated	cattle	bta-miR-200a	NA	NA	NA	NA	NA	NA
AACACTGTCTGGTAACGATGTG	miRNA	bta-miR-200a	mature	novel	non-templated	cattle	bta-miR-200a	NA	NA	NA	NA	NA	NA
AACACTGTCTGGTAACGATGTTA	miRNA	bta-miR-200a	mature	novel	non-templated	cattle	bta-miR-200a	NA	NA	NA	NA	NA	NA
AACACTGTCTGGTAACGATGTTT	miRNA	bta-miR-200a	mature	novel	non-templated	cattle	bta-miR-200a	NA	NA	NA	NA	NA	NA
AACATTCAACGCTGTCGGTGAGA	miRNA	ssc-miR-181a	mature	known	non-templated	pig	ssc-miR-181a	NA	NA	NA	NA	NA	NA
AACATTCAACGCTGTCGGTGAGC	miRNA	ssc-miR-181a	mature	known	non-templated	pig	ssc-miR-181a	NA	NA	NA	NA	NA	NA
AACCCGTAGATCCGATCTTGA	miRNA	ssc-miR-99a	mature	known	non-templated	pig	ssc-miR-99a	NA	NA	NA	NA	NA	NA
AACCCGTAGATCCGATCTTGC	miRNA	ssc-miR-99a	mature	known	non-templated	pig	ssc-miR-99a	NA	NA	NA	NA	NA	NA
AACCCGTAGATCCGATCTTGG	miRNA	ssc-miR-99a	mature	known	non-templated	pig	ssc-miR-99a	NA	NA	NA	NA	NA	NA
AACCCGTAGATCCGATCTTGTA	miRNA	ssc-miR-99a	mature	known	non-templated	pig	ssc-miR-99a	NA		NA	NA	NA	NA
AACCCGTAGATCCGATCTTGTAA	miRNA	ssc-miR-99a	mature	known	non-templated	pig	ssc-miR-99a	NA		NA	NA	NA	NA
AACCCGTAGATCCGATCTTGTGA	miRNA	ssc-miR-99a	mature	known	non-templated	pig	ssc-miR-99a	NA		NA	NA	NA	NA
AACCCGTAGATCCGATCTTGTGAA	miRNA	ssc-miR-99a	mature	known	non-templated	pig	ssc-miR-99a	NA		NA	NA	NA	NA
AACCCGTAGATCCGATCTTGTGC	miRNA	ssc-miR-99a	mature	known	non-templated	pig	ssc-miR-99a	NA		NA	NA	NA	NA
AACCCGTAGATCCGATCTTGTGT	miRNA	ssc-miR-99a	mature	known	non-templated	pig	ssc-miR-99a	NA		NA	NA	NA	NA
AACGGAATCCCAAAAGCAGCA	miRNA	ssc-miR-191	mature	known	non-templated	pig	ssc-miR-191	NA	NA	NA	NA	NA	NA
AACGGAATCCCAAAAGCAGCC	miRNA	ssc-miR-191	mature	known	non-templated	pig	ssc-miR-191	NA	NA	NA	NA	NA	NA
AACGGAATCCCAAAAGCAGCTA	miRNA	ssc-miR-191	mature	known	non-templated	pig	ssc-miR-191	NA	NA	NA	NA	NA	NA
AACGGAATCCCAAAAGCAGCTGA	miRNA	ssc-miR-191	mature	known	non-templated	pig	ssc-miR-191	NA	NA	NA	NA	NA	NA
AACGGAATCCCAAAAGCAGCTT	miRNA	ssc-miR-191	mature	known	non-templated	pig	ssc-miR-191	NA	NA	NA	NA	NA	NA
AACTGTACTCCAGCCTGGGCAACATAGCGAGACCCCGTCTCTT	miRNA	ssc-miR-1285	mature	known	non-templated	pig	ssc-miR-1285	NA		NA	NA	NA	ENST00000626159
AAGCTCGGTCTGAGGCCCCTCAGA	miRNA	ssc-miR-423-3p	mature	known	non-templated	pig	ssc-miR-423-3p	NA		NA	NA	NA	ENST00000362201
AAGCTCGGTCTGAGGCCCCTCAGC	miRNA	ssc-miR-423-3p	mature	known	non-templated	pig	ssc-miR-423-3p	NA		NA	NA	NA	ENST00000362201
AAGCTCGGTCTGAGGCCCCTCAGG	miRNA	ssc-miR-423-3p	mature	known	non-templated	pig	ssc-miR-423-3p	NA		NA	NA	NA	ENST00000362201
AAGCTCGGTCTGAGGCCCCTCAGTA	miRNA	ssc-miR-423-3p	mature	known	non-templated	pig	ssc-miR-423-3p	NA		NA	NA	NA	ENST00000362201
AAGCTCGGTCTGAGGCCCCTT	miRNA	ssc-miR-423-3p	mature	known	non-templated	pig	ssc-miR-423-3p	NA		NA	NA	NA	ENST00000362201
AAGCTGCCAGTTGAAGAACC	miRNA	ssc-miR-22-3p	mature	known	non-templated	pig	ssc-miR-22-3p	NA		NA	NA	NA	ENST00000334146,gene_biotype:lincRNA,gene_symbol:MIR22HG
AAGCTGCCAGTTGAAGAACTGA	miRNA	ssc-miR-22-3p	mature	known	non-templated	pig	ssc-miR-22-3p	NA		NA	NA	NA	ENST00000334146,gene_biotype:lincRNA,gene_symbol:MIR22HG
AAGCTGCCAGTTGAAGAACTGC	miRNA	ssc-miR-22-3p	mature	known	non-templated	pig	ssc-miR-22-3p	NA		NA	NA	NA	ENST00000334146,gene_biotype:lincRNA,gene_symbol:MIR22HG
AAGCTGCCAGTTGAAGAACTGG	miRNA	ssc-miR-22-3p	mature	known	non-templated	pig	ssc-miR-22-3p	NA		NA	NA	NA	ENST00000334146,gene_biotype:lincRNA,gene_symbol:MIR22HG
AAGCTGCCAGTTGAAGAACTGTA	miRNA	ssc-miR-22-3p	mature	known	non-templated	pig	ssc-miR-22-3p	NA		NA	NA	NA	ENST00000334146,gene_biotype:lincRNA,gene_symbol:MIR22HG
AAGGAGCTCACAGTCTATTGAA	miRNA	ssc-miR-28-5p	mature	known	non-templated	pig	ssc-miR-28-5p	NA	NA	NA	NA	NA	NA
AAGGAGCTCACAGTCTATTGAGA	miRNA	ssc-miR-28-5p	mature	known	non-templated	pig	ssc-miR-28-5p	NA		NA	NA	NA	NA
AAGTCGTGATACTGTAAACGCTTTCTGATG	miRNA	hsa-miR-3607-3p	mature	novel	non-templated	human	hsa-miR-3607-3p	NA		NA	NA	NA	NA
AAGTCGTGATACTGTAAACGCTTTCTGATGTA	miRNA	hsa-miR-3607-3p	mature	novel	non-templated	human	hsa-miR-3607-3p	NA		NA	NA	NA	NA
AAGTGCTTCCATGTTTCAGTGA	miRNA	bta-miR-302c	mature	novel	non-templated	cattle	bta-miR-302c	NA	NA	NA	NA	NA	NA
AAGTGCTTCCATGTTTCAGTGGC	miRNA	bta-miR-302c	mature	novel	non-templated	cattle	bta-miR-302c	NA	NA	NA	NA	NA	NA
AAGTGCTTCCATGTTTCAGTGGT	miRNA	bta-miR-302c	mature	novel	non-templated	cattle	bta-miR-302c	NA	NA	NA	NA	NA	NA
AAGTGCTTCCATGTTTCAGTGT	miRNA	bta-miR-302c	mature	novel	non-templated	cattle	bta-miR-302c	NA	NA	NA	NA	NA	NA
AAGTGCTTCCATGTTTTAGA	miRNA	bta-miR-302d	mature	novel	non-templated	cattle	bta-miR-302d	NA		NA	NA	NA	ENST00000362188,gene_biotype:antisense,gene_symbol:MIR302B
AAGTGCTTCCATGTTTTAGC	miRNA	bta-miR-302d	mature	novel	non-templated	cattle	bta-miR-302d	NA		NA	NA	NA	ENST00000362188,gene_biotype:antisense,gene_symbol:MIR302B
AAGTGCTTCCATGTTTTAGCAG	miRNA	bta-miR-302d	mature	novel	non-templated	cattle	bta-miR-302d	NA	NA	NA	NA	NA	NA
AAGTGCTTCCATGTTTTAGG	miRNA	bta-miR-302d	mature	novel	non-templated	cattle	bta-miR-302d	NA		NA	NA	NA	ENST00000362188,gene_biotype:antisense,gene_symbol:MIR302B
AAGTGCTTCCATGTTTTAGTAA	miRNA	bta-miR-302b	mature	novel	non-templated	cattle	bta-miR-302b	NA		NA	NA	NA	ENST00000362188,gene_biotype:antisense,gene_symbol:MIR302B
AAGTGCTTCCATGTTTTAGTAC	miRNA	bta-miR-302b	mature	novel	non-templated	cattle	bta-miR-302b	NA		NA	NA	NA	ENST00000362188,gene_biotype:antisense,gene_symbol:MIR302B
AAGTGCTTCCATGTTTTAGTAGC	miRNA	bta-miR-302b	mature	novel	non-templated	cattle	bta-miR-302b	NA		NA	NA	NA	ENST00000362188,gene_biotype:antisense,gene_symbol:MIR302B
AAGTGCTTCCATGTTTTAGTAGT	miRNA	bta-miR-302b	mature	novel	non-templated	cattle	bta-miR-302b	NA		NA	NA	NA	ENST00000362188,gene_biotype:antisense,gene_symbol:MIR302B
AAGTGCTTCCATGTTTTAGTAT	miRNA	bta-miR-302b	mature	novel	non-templated	cattle	bta-miR-302b	NA		NA	NA	NA	ENST00000362188,gene_biotype:antisense,gene_symbol:MIR302B
AAGTGCTTCCATGTTTTAGTGAA	miRNA	bta-miR-302a	mature	novel	non-templated	cattle	bta-miR-302a	NA		NA	NA	NA	NA
AAGTGCTTCCATGTTTTAGTGG	miRNA	bta-miR-302a	mature	novel	non-templated	cattle	bta-miR-302a	NA		NA	NA	NA	ENST00000362188,gene_biotype:antisense,gene_symbol:MIR302B
AAGTGCTTCCATGTTTTAGTGT	miRNA	bta-miR-302a	mature	novel	non-templated	cattle	bta-miR-302a	NA		NA	NA	NA	ENST00000362188,gene_biotype:antisense,gene_symbol:MIR302B
AAGTGGTTTTACCCTATGGTAG	miRNA	ssc-miR-140-5p	mature	known	non-templated	pig	ssc-miR-140-5p	NA		NA	NA	NA	NA
AATACTGCCGGGTAATGATGGAA	miRNA	bta-miR-200c	mature	novel	non-templated	cattle	bta-miR-200c	NA	NA	NA	NA	NA	NA
AATACTGCCGGGTAATGATGGAT	miRNA	bta-miR-200c	mature	novel	non-templated	cattle	bta-miR-200c	NA	NA	NA	NA	NA	NA
AATACTGCCGGGTAATGATGGG	miRNA	bta-miR-200c	mature	novel	non-templated	cattle	bta-miR-200c	NA	NA	NA	NA	NA	NA
AATACTGCCGGGTAATGATGGT	miRNA	bta-miR-200c	mature	novel	non-templated	cattle	bta-miR-200c	NA	NA	NA	NA	NA	NA
AATACTGCCTGGTAATGATA	miRNA	bta-miR-200b	mature	novel	non-templated	cattle	bta-miR-200b	NA	NA	NA	NA	NA	NA
AATACTGCCTGGTAATGATGAA	miRNA	hsa-miR-200b-3p	mature	novel	non-templated	human	hsa-miR-200b-3p	NA	NA	NA	NA	NA	NA
AATACTGCCTGGTAATGATGAT	miRNA	hsa-miR-200b-3p	mature	novel	non-templated	human	hsa-miR-200b-3p	NA	NA	NA	NA	NA	NA
AATACTGCCTGGTAATGATGCC	miRNA	hsa-miR-200b-3p	mature	novel	non-templated	human	hsa-miR-200b-3p	NA	NA	NA	NA	NA	NA
AATACTGCCTGGTAATGATGGC	miRNA	hsa-miR-200b-3p	mature	novel	non-templated	human	hsa-miR-200b-3p	NA	NA	NA	NA	NA	NA
AATACTGCCTGGTAATGATGT	miRNA	bta-miR-200b	mature	novel	non-templated	cattle	bta-miR-200b	NA	NA	NA	NA	NA	NA
AATACTGCCTGGTAATGATGTC	miRNA	hsa-miR-200b-3p	mature	novel	non-templated	human	hsa-miR-200b-3p	NA	NA	NA	NA	NA	NA
AATACTGTCTGGTAATGCCGA	miRNA	ssc-miR-429	mature	known	non-templated	pig	ssc-miR-429	NA	NA	NA	NA	NA	NA
AATACTGTCTGGTAATGCCGC	miRNA	ssc-miR-429	mature	known	non-templated	pig	ssc-miR-429	NA	NA	NA	NA	NA	NA
AATAGCCACTGTACTCCAGCCTGGGCAACATAGCGAGACCCCGTCTCTA	miRNA	ssc-miR-1285	mature	known	non-templated	pig	ssc-miR-1285	NA		NA	NA	NA	ENST00000618786,gene_biotype:misc_RNA,gene_symbol:RN7SL1
AATAGCCACTGTACTCCAGCCTGGGCAACATAGCGAGACCCCGTCTCTC	miRNA	ssc-miR-1285	mature	known	non-templated	pig	ssc-miR-1285	NA		NA	NA	NA	ENST00000618786,gene_biotype:misc_RNA,gene_symbol:RN7SL1
AATAGCCACTGTACTCCAGCCTGGGCAACATAGCGAGACCCCGTCTCTG	miRNA	ssc-miR-1285	mature	known	non-templated	pig	ssc-miR-1285	NA		NA	NA	NA	ENST00000618786,gene_biotype:misc_RNA,gene_symbol:RN7SL1
AATAGCCACTGTACTCCAGCCTGGGCAACATAGCGAGACCCCGTCTCTTA	miRNA	ssc-miR-1285	mature	known	non-templated	pig	ssc-miR-1285	NA		NA	NA	NA	ENST00000626159
AATCACTAACCACACGGCCAGA	miRNA	hsa-miR-34c-3p	mature	novel	non-templated	human	hsa-miR-34c-3p	NA	NA	NA	NA	NA	NA
AATGACACGATCACTCCCGTTGAGA	miRNA	ssc-miR-425-5p	mature	known	non-templated	pig	ssc-miR-425-5p	NA		NA	NA	NA	NA
AATGACACGATCACTCCCGTTGAGC	miRNA	ssc-miR-425-5p	mature	known	non-templated	pig	ssc-miR-425-5p	NA		NA	NA	NA	NA
AATGGATTTTTGGAGCC	miRNA	bta-miR-1246	mature	novel	non-templated	cattle	bta-miR-1246	NA		NA	NA	NA	ENST00000516795,gene_biotype:snRNA,gene_symbol:RNU2-44P
AATGGATTTTTGGAGCT	miRNA	bta-miR-1246	mature	novel	non-templated	cattle	bta-miR-1246	NA		NA	NA	NA	ENST00000410666,gene_biotype:snRNA,gene_symbol:RNU2-49P
AATGGATTTTTGGAGT	miRNA	bta-miR-1246	mature	novel	non-templated	cattle	bta-miR-1246	NA	NA	NA	NA	NA	NA
AATGGCGCCACTAGGGTTGTGT	miRNA	bta-miR-652	mature	novel	non-templated	cattle	bta-miR-652	NA		NA	NA	NA	NA
ACAGTACTGTGATAACTGAAA	miRNA	ssc-miR-101	mature	known	non-templated	pig	ssc-miR-101	NA	NA	NA	NA	NA	NA
ACCACAGGGTAGAACCACGGACG	miRNA	ssc-miR-140-3p	mature	known	non-templated	pig	ssc-miR-140-3p	NA	NA	NA	NA	NA	NA
ACCACAGGGTAGAACCACGGAT	miRNA	ssc-miR-140-3p	mature	known	non-templated	pig	ssc-miR-140-3p	NA	NA	NA	NA	NA	NA
ACCCGTAGAACCGACCTTGCA	miRNA	ssc-miR-99b	mature	known	non-templated	pig	ssc-miR-99b	NA	NA	NA	NA	NA	NA
ACCCGTAGATCCGATCTTGC	miRNA	ssc-miR-99a	mature	known	non-templated	pig	ssc-miR-99a	NA	NA	NA	NA	NA	NA
ACCCGTAGATCCGATCTTGG	miRNA	ssc-miR-99a	mature	known	non-templated	pig	ssc-miR-99a	NA	NA	NA	NA	NA	NA
ACCCGTAGATCCGATCTTGTGA	miRNA	ssc-miR-99a	mature	known	non-templated	pig	ssc-miR-99a	NA	NA	NA	NA	NA	NA
ACCCGTAGATCCGATCTTGTGT	miRNA	ssc-miR-99a	mature	known	non-templated	pig	ssc-miR-99a	NA	NA	NA	NA	NA	NA
ACCCTGTAGAACCGAATTTGA	miRNA	ssc-miR-10b	mature	known	non-templated	pig	ssc-miR-10b	NA	NA	NA	NA	NA	NA
ACCCTGTAGAACCGAATTTGC	miRNA	ssc-miR-10b	mature	known	non-templated	pig	ssc-miR-10b	NA	NA	NA	NA	NA	NA
ACCCTGTAGAACCGAATTTGTA	miRNA	ssc-miR-10b	mature	known	non-templated	pig	ssc-miR-10b	NA	NA	NA	NA	NA	NA
ACCCTGTAGAACCGAATTTGTGA	miRNA	bta-miR-10b	mature	novel	non-templated	cattle	bta-miR-10b	NA		NA	NA	NA	ENST00000385043,gene_biotype:sense_intronic,gene_symbol:MIR10A
ACCCTGTAGAACCGAATTTGTGC	miRNA	bta-miR-10b	mature	novel	non-templated	cattle	bta-miR-10b	NA		NA	NA	NA	ENST00000385043,gene_biotype:sense_intronic,gene_symbol:MIR10A
ACCCTGTAGAACCGAATTTGTT	miRNA	ssc-miR-10b	mature	known	non-templated	pig	ssc-miR-10b	NA	NA	NA	NA	NA	NA
ACCCTGTAGATCCGAATC	miRNA	ssc-miR-10a-5p	mature	known	non-templated	pig	ssc-miR-10a-5p	NA		NA	NA	NA	ENST00000385043,gene_biotype:sense_intronic,gene_symbol:MIR10A
ACCCTGTAGATCCGAATTTGA	miRNA	ssc-miR-10a-5p	mature	known	non-templated	pig	ssc-miR-10a-5p	NA		NA	NA	NA	ENST00000385043,gene_biotype:sense_intronic,gene_symbol:MIR10A
ACCCTGTAGATCCGAATTTGC	miRNA	ssc-miR-10a-5p	mature	known	non-templated	pig	ssc-miR-10a-5p	NA		NA	NA	NA	ENST00000385043,gene_biotype:sense_intronic,gene_symbol:MIR10A
ACCCTGTAGATCCGAATTTGG	miRNA	ssc-miR-10a-5p	mature	known	non-templated	pig	ssc-miR-10a-5p	NA		NA	NA	NA	ENST00000385043,gene_biotype:sense_intronic,gene_symbol:MIR10A
ACCCTGTAGATCCGAATTTGTA	miRNA	ssc-miR-10a-5p	mature	known	non-templated	pig	ssc-miR-10a-5p	NA		NA	NA	NA	ENST00000385043,gene_biotype:sense_intronic,gene_symbol:MIR10A
ACCCTGTAGATCCGAATTTGTGA	miRNA	bta-miR-10a	mature	novel	non-templated	cattle	bta-miR-10a	NA		NA	NA	NA	ENST00000385043,gene_biotype:sense_intronic,gene_symbol:MIR10A
ACCCTGTAGATCCGAATTTGTGC	miRNA	bta-miR-10a	mature	novel	non-templated	cattle	bta-miR-10a	NA		NA	NA	NA	ENST00000385043,gene_biotype:sense_intronic,gene_symbol:MIR10A
ACCCTGTAGATCCGAATTTGTGG	miRNA	bta-miR-10a	mature	novel	non-templated	cattle	bta-miR-10a	NA		NA	NA	NA	ENST00000385043,gene_biotype:sense_intronic,gene_symbol:MIR10A
ACCCTGTAGATCCGAATTTGTT	miRNA	ssc-miR-10a-5p	mature	known	non-templated	pig	ssc-miR-10a-5p	NA		NA	NA	NA	ENST00000385043,gene_biotype:sense_intronic,gene_symbol:MIR10A
ACGTTGGCTCTGGTGGTGATGT	miRNA	ssc-miR-1306-3p	mature	known	non-templated	pig	ssc-miR-1306-3p	NA		NA	NA	NA	ENST00000408439
ACTAGATTGTGAGCTCCTGGAA	miRNA	ssc-miR-28-3p	mature	known	non-templated	pig	ssc-miR-28-3p	NA	NA	NA	NA	NA	NA
ACTCAAACTGTGGGGA	miRNA	ssc-miR-371-5p	mature	known	non-templated	pig	ssc-miR-371-5p	NA	NA	NA	NA	NA	NA
ACTCAAACTGTGGGGC	miRNA	ssc-miR-371-5p	mature	known	non-templated	pig	ssc-miR-371-5p	NA		XM_005654483.1;mRNA	NA	NA	NA
ACTCAAACTGTGGGGGA	miRNA	ssc-miR-371-5p	mature	known	non-templated	pig	ssc-miR-371-5p	NA	NA	NA	NA	NA	NA
ACTCAAACTGTGGGGGCAA	miRNA	ssc-miR-371-5p	mature	known	non-templated	pig	ssc-miR-371-5p	NA	NA	NA	NA	NA	NA
ACTCAAACTGTGGGGGCACA	miRNA	ssc-miR-371-5p	mature	known	non-templated	pig	ssc-miR-371-5p	NA	NA	NA	NA	NA	NA
ACTCAAACTGTGGGGGCACAAA	miRNA	hsa-miR-371a-5p	mature	novel	non-templated	human	hsa-miR-371a-5p	NA	NA	NA	NA	NA	NA
ACTCAAACTGTGGGGGCACATT	miRNA	hsa-miR-371a-5p	mature	novel	non-templated	human	hsa-miR-371a-5p	NA	NA	NA	NA	NA	NA
ACTCAAACTGTGGGGGCACC	miRNA	ssc-miR-371-5p	mature	known	non-templated	pig	ssc-miR-371-5p	NA	NA	NA	NA	NA	NA
ACTCAAACTGTGGGGGCACCA	miRNA	hsa-miR-371a-5p	mature	novel	non-templated	human	hsa-miR-371a-5p	NA	NA	NA	NA	NA	NA
ACTCAAACTGTGGGGGCACCC	miRNA	hsa-miR-371a-5p	mature	novel	non-templated	human	hsa-miR-371a-5p	NA	NA	NA	NA	NA	NA
ACTCAAACTGTGGGGGCACCT	miRNA	hsa-miR-371a-5p	mature	novel	non-templated	human	hsa-miR-371a-5p	NA	NA	NA	NA	NA	NA
ACTCAAACTGTGGGGGCACCTC	miRNA	hsa-miR-371a-5p	mature	novel	non-templated	human	hsa-miR-371a-5p	NA	NA	NA	NA	NA	NA
ACTCAAACTGTGGGGGCACCTT	miRNA	hsa-miR-371a-5p	mature	novel	non-templated	human	hsa-miR-371a-5p	NA	NA	NA	NA	NA	NA
ACTCAAACTGTGGGGGCACCTTA	miRNA	hsa-miR-371a-5p	mature	novel	non-templated	human	hsa-miR-371a-5p	NA	NA	NA	NA	NA	NA
ACTCAAACTGTGGGGGCACCTTC	miRNA	hsa-miR-371a-5p	mature	novel	non-templated	human	hsa-miR-371a-5p	NA	NA	NA	NA	NA	NA
ACTCAAACTGTGGGGGCACG	miRNA	ssc-miR-371-5p	mature	known	non-templated	pig	ssc-miR-371-5p	NA	NA	NA	NA	NA	NA
ACTCAAACTGTGGGGGCACGT	miRNA	hsa-miR-371a-5p	mature	novel	non-templated	human	hsa-miR-371a-5p	NA	NA	NA	NA	NA	NA
ACTCAAACTGTGGGGGCACGTT	miRNA	hsa-miR-371a-5p	mature	novel	non-templated	human	hsa-miR-371a-5p	NA	NA	NA	NA	NA	NA
ACTCAAACTGTGGGGGCACGTTC	miRNA	hsa-miR-371a-5p	mature	novel	non-templated	human	hsa-miR-371a-5p	NA	NA	NA	NA	NA	NA
ACTCAAACTGTGGGGGCACTA	miRNA	ssc-miR-371-5p	mature	known	non-templated	pig	ssc-miR-371-5p	NA		NA	NA	NA	NA
ACTCAAACTGTGGGGGCACTAA	miRNA	hsa-miR-371a-5p	mature	novel	non-templated	human	hsa-miR-371a-5p	NA		NA	NA	NA	NA
ACTCAAACTGTGGGGGCACTAAA	miRNA	hsa-miR-371a-5p	mature	novel	non-templated	human	hsa-miR-371a-5p	NA		NA	NA	NA	NA
ACTCAAACTGTGGGGGCACTAAAA	miRNA	hsa-miR-371a-5p	mature	novel	non-templated	human	hsa-miR-371a-5p	NA		NA	NA	NA	NA
ACTCAAACTGTGGGGGCACTAAC	miRNA	hsa-miR-371a-5p	mature	novel	non-templated	human	hsa-miR-371a-5p	NA		NA	NA	NA	NA
ACTCAAACTGTGGGGGCACTAAG	miRNA	hsa-miR-371a-5p	mature	novel	non-templated	human	hsa-miR-371a-5p	NA		NA	NA	NA	NA
ACTCAAACTGTGGGGGCACTAAT	miRNA	hsa-miR-371a-5p	mature	novel	non-templated	human	hsa-miR-371a-5p	NA		NA	NA	NA	NA
ACTCAAACTGTGGGGGCACTAC	miRNA	hsa-miR-371a-5p	mature	novel	non-templated	human	hsa-miR-371a-5p	NA		NA	NA	NA	NA
ACTCAAACTGTGGGGGCACTAG	miRNA	hsa-miR-371a-5p	mature	novel	non-templated	human	hsa-miR-371a-5p	NA		NA	NA	NA	NA
ACTCAAACTGTGGGGGCACTAGA	miRNA	hsa-miR-371a-5p	mature	novel	non-templated	human	hsa-miR-371a-5p	NA		NA	NA	NA	NA
ACTCAAACTGTGGGGGCACTAT	miRNA	hsa-miR-371a-5p	mature	novel	non-templated	human	hsa-miR-371a-5p	NA		NA	NA	NA	NA
ACTCAAACTGTGGGGGCACTC	miRNA	ssc-miR-371-5p	mature	known	non-templated	pig	ssc-miR-371-5p	NA		NA	NA	NA	NA
ACTCAAACTGTGGGGGCACTCC	miRNA	hsa-miR-371a-5p	mature	novel	non-templated	human	hsa-miR-371a-5p	NA		NA	NA	NA	NA
ACTCAAACTGTGGGGGCACTCT	miRNA	hsa-miR-371a-5p	mature	novel	non-templated	human	hsa-miR-371a-5p	NA		NA	NA	NA	NA
ACTCAAACTGTGGGGGCACTCTC	miRNA	hsa-miR-371a-5p	mature	novel	non-templated	human	hsa-miR-371a-5p	NA		NA	NA	NA	NA
ACTCAAACTGTGGGGGCACTG	miRNA	ssc-miR-371-5p	mature	known	non-templated	pig	ssc-miR-371-5p	NA		NA	NA	NA	NA
ACTCAAACTGTGGGGGCACTGC	miRNA	hsa-miR-371a-5p	mature	novel	non-templated	human	hsa-miR-371a-5p	NA		NA	NA	NA	NA
ACTCAAACTGTGGGGGCACTGT	miRNA	hsa-miR-371a-5p	mature	novel	non-templated	human	hsa-miR-371a-5p	NA		NA	NA	NA	NA
ACTCAAACTGTGGGGGCACTTA	miRNA	ssc-miR-371-5p	mature	known	non-templated	pig	ssc-miR-371-5p	NA		NA	NA	NA	NA
ACTCAAACTGTGGGGGCACTTAA	miRNA	ssc-miR-371-5p	mature	known	non-templated	pig	ssc-miR-371-5p	NA		NA	NA	NA	NA
ACTCAAACTGTGGGGGCACTTAAA	miRNA	ssc-miR-371-5p	mature	known	non-templated	pig	ssc-miR-371-5p	NA		NA	NA	NA	NA
ACTCAAACTGTGGGGGCACTTAAAA	miRNA	ssc-miR-371-5p	mature	known	non-templated	pig	ssc-miR-371-5p	NA		NA	NA	NA	NA
ACTCAAACTGTGGGGGCACTTAAAG	miRNA	ssc-miR-371-5p	mature	known	non-templated	pig	ssc-miR-371-5p	NA		NA	NA	NA	NA
ACTCAAACTGTGGGGGCACTTAAAT	miRNA	ssc-miR-371-5p	mature	known	non-templated	pig	ssc-miR-371-5p	NA		NA	NA	NA	NA
ACTCAAACTGTGGGGGCACTTAAC	miRNA	ssc-miR-371-5p	mature	known	non-templated	pig	ssc-miR-371-5p	NA		NA	NA	NA	NA
ACTCAAACTGTGGGGGCACTTAAG	miRNA	ssc-miR-371-5p	mature	known	non-templated	pig	ssc-miR-371-5p	NA		NA	NA	NA	NA
ACTCAAACTGTGGGGGCACTTAAGA	miRNA	ssc-miR-371-5p	mature	known	non-templated	pig	ssc-miR-371-5p	NA		NA	NA	NA	NA
ACTCAAACTGTGGGGGCACTTAAT	miRNA	ssc-miR-371-5p	mature	known	non-templated	pig	ssc-miR-371-5p	NA		NA	NA	NA	NA
ACTCAAACTGTGGGGGCACTTAC	miRNA	ssc-miR-371-5p	mature	known	non-templated	pig	ssc-miR-371-5p	NA		NA	NA	NA	NA
ACTCAAACTGTGGGGGCACTTACA	miRNA	ssc-miR-371-5p	mature	known	non-templated	pig	ssc-miR-371-5p	NA		NA	NA	NA	NA
ACTCAAACTGTGGGGGCACTTAG	miRNA	ssc-miR-371-5p	mature	known	non-templated	pig	ssc-miR-371-5p	NA		NA	NA	NA	NA
ACTCAAACTGTGGGGGCACTTAGA	miRNA	ssc-miR-371-5p	mature	known	non-templated	pig	ssc-miR-371-5p	NA		NA	NA	NA	NA
ACTCAAACTGTGGGGGCACTTAGT	miRNA	ssc-miR-371-5p	mature	known	non-templated	pig	ssc-miR-371-5p	NA		NA	NA	NA	NA
ACTCAAACTGTGGGGGCACTTAT	miRNA	ssc-miR-371-5p	mature	known	non-templated	pig	ssc-miR-371-5p	NA		NA	NA	NA	NA
ACTCAAACTGTGGGGGCACTTCA	miRNA	ssc-miR-371-5p	mature	known	non-templated	pig	ssc-miR-371-5p	NA		NA	NA	NA	NA
ACTCAAACTGTGGGGGCACTTCG	miRNA	ssc-miR-371-5p	mature	known	non-templated	pig	ssc-miR-371-5p	NA		NA	NA	NA	NA
ACTCAAACTGTGGGGGCACTTCT	miRNA	ssc-miR-371-5p	mature	known	non-templated	pig	ssc-miR-371-5p	NA		NA	NA	NA	NA
ACTCAAACTGTGGGGGCACTTG	miRNA	ssc-miR-371-5p	mature	known	non-templated	pig	ssc-miR-371-5p	NA		NA	NA	NA	NA
ACTCAAACTGTGGGGGCACTTGA	miRNA	ssc-miR-371-5p	mature	known	non-templated	pig	ssc-miR-371-5p	NA		NA	NA	NA	NA
ACTCAAACTGTGGGGGCACTTGAA	miRNA	ssc-miR-371-5p	mature	known	non-templated	pig	ssc-miR-371-5p	NA		NA	NA	NA	NA
ACTCAAACTGTGGGGGCACTTGC	miRNA	ssc-miR-371-5p	mature	known	non-templated	pig	ssc-miR-371-5p	NA		NA	NA	NA	NA
ACTCAAACTGTGGGGGCACTTGT	miRNA	ssc-miR-371-5p	mature	known	non-templated	pig	ssc-miR-371-5p	NA		NA	NA	NA	NA
ACTCAAACTGTGGGGGCACTTTA	miRNA	ssc-miR-371-5p	mature	known	non-templated	pig	ssc-miR-371-5p	NA		NA	NA	NA	NA
ACTCAAACTGTGGGGGCACTTTAA	miRNA	ssc-miR-371-5p	mature	known	non-templated	pig	ssc-miR-371-5p	NA		NA	NA	NA	NA
ACTCAAACTGTGGGGGCACTTTAAA	miRNA	ssc-miR-371-5p	mature	known	non-templated	pig	ssc-miR-371-5p	NA		NA	NA	NA	NA
ACTCAAACTGTGGGGGCACTTTAAAA	miRNA	ssc-miR-371-5p	mature	known	non-templated	pig	ssc-miR-371-5p	NA		NA	NA	NA	NA
ACTCAAACTGTGGGGGCACTTTAAAAA	miRNA	ssc-miR-371-5p	mature	known	non-templated	pig	ssc-miR-371-5p	NA		NA	NA	NA	NA
ACTCAAACTGTGGGGGCACTTTAAAC	miRNA	ssc-miR-371-5p	mature	known	non-templated	pig	ssc-miR-371-5p	NA		NA	NA	NA	NA
ACTCAAACTGTGGGGGCACTTTAAAG	miRNA	ssc-miR-371-5p	mature	known	non-templated	pig	ssc-miR-371-5p	NA		NA	NA	NA	NA
ACTCAAACTGTGGGGGCACTTTAAAT	miRNA	ssc-miR-371-5p	mature	known	non-templated	pig	ssc-miR-371-5p	NA		NA	NA	NA	NA
ACTCAAACTGTGGGGGCACTTTAAC	miRNA	ssc-miR-371-5p	mature	known	non-templated	pig	ssc-miR-371-5p	NA		NA	NA	NA	NA
ACTCAAACTGTGGGGGCACTTTAAG	miRNA	ssc-miR-371-5p	mature	known	non-templated	pig	ssc-miR-371-5p	NA		NA	NA	NA	NA
ACTCAAACTGTGGGGGCACTTTAAGA	miRNA	ssc-miR-371-5p	mature	known	non-templated	pig	ssc-miR-371-5p	NA		NA	NA	NA	NA
ACTCAAACTGTGGGGGCACTTTAAT	miRNA	ssc-miR-371-5p	mature	known	non-templated	pig	ssc-miR-371-5p	NA		NA	NA	NA	NA
ACTCAAACTGTGGGGGCACTTTAC	miRNA	ssc-miR-371-5p	mature	known	non-templated	pig	ssc-miR-371-5p	NA		NA	NA	NA	NA
ACTCAAACTGTGGGGGCACTTTAG	miRNA	ssc-miR-371-5p	mature	known	non-templated	pig	ssc-miR-371-5p	NA		NA	NA	NA	NA
ACTCAAACTGTGGGGGCACTTTAGA	miRNA	ssc-miR-371-5p	mature	known	non-templated	pig	ssc-miR-371-5p	NA		NA	NA	NA	NA
ACTCAAACTGTGGGGGCACTTTAGC	miRNA	ssc-miR-371-5p	mature	known	non-templated	pig	ssc-miR-371-5p	NA		NA	NA	NA	NA
ACTCAAACTGTGGGGGCACTTTAGT	miRNA	ssc-miR-371-5p	mature	known	non-templated	pig	ssc-miR-371-5p	NA		NA	NA	NA	NA
ACTCAAACTGTGGGGGCACTTTAT	miRNA	ssc-miR-371-5p	mature	known	non-templated	pig	ssc-miR-371-5p	NA		NA	NA	NA	NA
ACTCAAACTGTGGGGGCACTTTATT	miRNA	ssc-miR-371-5p	mature	known	non-templated	pig	ssc-miR-371-5p	NA		NA	NA	NA	NA
ACTCAAACTGTGGGGGCACTTTCA	miRNA	ssc-miR-371-5p	mature	known	non-templated	pig	ssc-miR-371-5p	NA		NA	NA	NA	NA
ACTCAAACTGTGGGGGCACTTTCAA	miRNA	ssc-miR-371-5p	mature	known	non-templated	pig	ssc-miR-371-5p	NA		NA	NA	NA	NA
ACTCAAACTGTGGGGGCACTTTCAAA	miRNA	ssc-miR-371-5p	mature	known	non-templated	pig	ssc-miR-371-5p	NA		NA	NA	NA	NA
ACTCAAACTGTGGGGGCACTTTCAAAA	miRNA	ssc-miR-371-5p	mature	known	non-templated	pig	ssc-miR-371-5p	NA		NA	NA	NA	NA
ACTCAAACTGTGGGGGCACTTTCAAC	miRNA	ssc-miR-371-5p	mature	known	non-templated	pig	ssc-miR-371-5p	NA		NA	NA	NA	NA
ACTCAAACTGTGGGGGCACTTTCAAG	miRNA	ssc-miR-371-5p	mature	known	non-templated	pig	ssc-miR-371-5p	NA		NA	NA	NA	NA
ACTCAAACTGTGGGGGCACTTTCAAT	miRNA	ssc-miR-371-5p	mature	known	non-templated	pig	ssc-miR-371-5p	NA		NA	NA	NA	NA
ACTCAAACTGTGGGGGCACTTTCAC	miRNA	ssc-miR-371-5p	mature	known	non-templated	pig	ssc-miR-371-5p	NA		NA	NA	NA	NA
ACTCAAACTGTGGGGGCACTTTCAG	miRNA	ssc-miR-371-5p	mature	known	non-templated	pig	ssc-miR-371-5p	NA		NA	NA	NA	NA
ACTCAAACTGTGGGGGCACTTTCAGA	miRNA	ssc-miR-371-5p	mature	known	non-templated	pig	ssc-miR-371-5p	NA		NA	NA	NA	NA
ACTCAAACTGTGGGGGCACTTTCAT	miRNA	ssc-miR-371-5p	mature	known	non-templated	pig	ssc-miR-371-5p	NA		NA	NA	NA	NA
ACTCAAACTGTGGGGGCACTTTCC	miRNA	ssc-miR-371-5p	mature	known	non-templated	pig	ssc-miR-371-5p	NA		NA	NA	NA	NA
ACTCAAACTGTGGGGGCACTTTCG	miRNA	ssc-miR-371-5p	mature	known	non-templated	pig	ssc-miR-371-5p	NA		NA	NA	NA	NA
ACTCAAACTGTGGGGGCACTTTCGA	miRNA	ssc-miR-371-5p	mature	known	non-templated	pig	ssc-miR-371-5p	NA		NA	NA	NA	NA
ACTCAAACTGTGGGGGCACTTTCGT	miRNA	ssc-miR-371-5p	mature	known	non-templated	pig	ssc-miR-371-5p	NA		NA	NA	NA	NA
ACTCAAACTGTGGGGGCACTTTG	miRNA	ssc-miR-371-5p	mature	known	non-templated	pig	ssc-miR-371-5p	NA		NA	NA	NA	NA
ACTCAAACTGTGGGGGCACTTTGA	miRNA	ssc-miR-371-5p	mature	known	non-templated	pig	ssc-miR-371-5p	NA		NA	NA	NA	NA
ACTCAAACTGTGGGGGCACTTTGAA	miRNA	ssc-miR-371-5p	mature	known	non-templated	pig	ssc-miR-371-5p	NA		NA	NA	NA	NA
ACTCAAACTGTGGGGGCACTTTGAAT	miRNA	ssc-miR-371-5p	mature	known	non-templated	pig	ssc-miR-371-5p	NA		NA	NA	NA	NA
ACTCAAACTGTGGGGGCACTTTGAT	miRNA	ssc-miR-371-5p	mature	known	non-templated	pig	ssc-miR-371-5p	NA		NA	NA	NA	NA
ACTCAAACTGTGGGGGCACTTTGC	miRNA	ssc-miR-371-5p	mature	known	non-templated	pig	ssc-miR-371-5p	NA		NA	NA	NA	NA
ACTCAAACTGTGGGGGCACTTTGG	miRNA	ssc-miR-371-5p	mature	known	non-templated	pig	ssc-miR-371-5p	NA		NA	NA	NA	NA
ACTCAAACTGTGGGGGCACTTTGT	miRNA	ssc-miR-371-5p	mature	known	non-templated	pig	ssc-miR-371-5p	NA		NA	NA	NA	NA
ACTCAAACTGTGGGGGCACTTTT	miRNA	ssc-miR-371-5p	mature	known	non-templated	pig	ssc-miR-371-5p	NA		NA	NA	NA	NA
ACTCAAACTGTGGGGGCACTTTTA	miRNA	ssc-miR-371-5p	mature	known	non-templated	pig	ssc-miR-371-5p	NA		NA	NA	NA	NA
ACTCAAACTGTGGGGGCACTTTTG	miRNA	ssc-miR-371-5p	mature	known	non-templated	pig	ssc-miR-371-5p	NA		NA	NA	NA	NA
ACTCAAACTGTGGGGGCACTTTTT	miRNA	ssc-miR-371-5p	mature	known	non-templated	pig	ssc-miR-371-5p	NA		NA	NA	NA	NA
ACTCAAACTGTGGGGGCAT	miRNA	ssc-miR-371-5p	mature	known	non-templated	pig	ssc-miR-371-5p	NA	NA	NA	NA	NA	NA
ACTCAAACTGTGGGGGCG	miRNA	ssc-miR-371-5p	mature	known	non-templated	pig	ssc-miR-371-5p	NA	NA	NA	NA	NA	NA
ACTCAAACTGTGGGGGCT	miRNA	ssc-miR-371-5p	mature	known	non-templated	pig	ssc-miR-371-5p	NA	NA	NA	NA	NA	NA
ACTCAAACTGTGGGGGT	miRNA	ssc-miR-371-5p	mature	known	non-templated	pig	ssc-miR-371-5p	NA	NA	NA	NA	NA	NA
ACTCAAACTGTGGGGT	miRNA	ssc-miR-371-5p	mature	known	non-templated	pig	ssc-miR-371-5p	NA	NA	NA	NA	NA	NA
ACTCGGCGTGGCGTCGGTCGC	miRNA	ssc-miR-1307	mature	known	non-templated	pig	ssc-miR-1307	NA		NA	NA	NA	ENST00000408840
ACTCGGCGTGGCGTCGGTCGTA	miRNA	ssc-miR-1307	mature	known	non-templated	pig	ssc-miR-1307	NA		NA	NA	NA	ENST00000408840
ACTCGGCGTGGCGTCGGTCGTGA	miRNA	ssc-miR-1307	mature	known	non-templated	pig	ssc-miR-1307	NA		NA	NA	NA	ENST00000408840
ACTCGGCGTGGCGTCGGTCGTGC	miRNA	ssc-miR-1307	mature	known	non-templated	pig	ssc-miR-1307	NA		NA	NA	NA	ENST00000408840
ACTCGGCGTGGCGTCGGTCGTGGA	miRNA	ssc-miR-1307	mature	known	non-templated	pig	ssc-miR-1307	NA		NA	NA	NA	ENST00000408840
ACTCGGCGTGGCGTCGGTCGTGGAA	miRNA	ssc-miR-1307	mature	known	non-templated	pig	ssc-miR-1307	NA		NA	NA	NA	ENST00000408840
ACTCGGCGTGGCGTCGGTCGTGGAAA	miRNA	ssc-miR-1307	mature	known	non-templated	pig	ssc-miR-1307	NA		NA	NA	NA	NA
ACTCGGCGTGGCGTCGGTCGTGT	miRNA	ssc-miR-1307	mature	known	non-templated	pig	ssc-miR-1307	NA		NA	NA	NA	ENST00000408840
ACTCTTTCCCTGTTGCACTACA	miRNA	hsa-miR-130b-5p	mature	novel	non-templated	human	hsa-miR-130b-5p	NA		NA	NA	NA	ENST00000385018,gene_biotype:processed_transcript,gene_symbol:MIR130B
ACTCTTTCCCTGTTGCACTACC	miRNA	hsa-miR-130b-5p	mature	novel	non-templated	human	hsa-miR-130b-5p	NA		NA	NA	NA	ENST00000385018,gene_biotype:processed_transcript,gene_symbol:MIR130B
ACTCTTTCCCTGTTGCACTAT	miRNA	hsa-miR-130b-5p	mature	novel	non-templated	human	hsa-miR-130b-5p	NA		NA	NA	NA	ENST00000385018,gene_biotype:processed_transcript,gene_symbol:MIR130B
ACTGGACTAGGAGTCAGAAGGC	miRNA	hsa-miR-378i	mature	novel	non-templated	human	hsa-miR-378i	NA		NA	NA	NA	ENST00000582688
ACTGGACTTGGAGCCAGAAGG	miRNA	hsa-miR-378f	mature	novel	non-templated	human	hsa-miR-378f	NA		NA	NA	NA	ENST00000628708
ACTGGACTTGGAGCCAGAAGGC	miRNA	hsa-miR-378f	mature	novel	non-templated	human	hsa-miR-378f	NA		NA	NA	NA	ENST00000628708
ACTGGACTTGGAGCCAGAAGGT	miRNA	hsa-miR-378f	mature	novel	non-templated	human	hsa-miR-378f	NA		NA	NA	NA	NA
ACTGGACTTGGAGTCAGAAAGC	miRNA	hsa-miR-378d	mature	novel	non-templated	human	hsa-miR-378d	NA		NA	NA	NA	ENST00000580636,gene_biotype:lincRNA,gene_symbol:MIR378D2
ACTGGACTTGGAGTCAGAAGC	miRNA	ssc-miR-378b-3p	mature	known	non-templated	pig	ssc-miR-378b-3p	NA		NA	NA	NA	ENST00000612936
ACTGGACTTGGAGTCAGAAGCC	miRNA	ssc-miR-378b-3p	mature	known	non-templated	pig	ssc-miR-378b-3p	NA		NA	NA	NA	ENST00000612936
ACTGGACTTGGAGTCAGAAGGA	miRNA	ssc-miR-378	mature	known	non-templated	pig	ssc-miR-378	NA		NA	NA	NA	ENST00000612936
ACTGGACTTGGAGTCAGAAGGAA	miRNA	ssc-miR-378	mature	known	non-templated	pig	ssc-miR-378	NA	NA	NA	NA	NA	NA
ACTGGACTTGGAGTCAGAAGGCA	miRNA	ssc-miR-378	mature	known	non-templated	pig	ssc-miR-378	NA		NA	NA	NA	NA
ACTGGACTTGGAGTCAGAAGGCAA	miRNA	ssc-miR-378	mature	known	non-templated	pig	ssc-miR-378	NA		NA	NA	NA	NA
ACTGGACTTGGAGTCAGAAGGCAC	miRNA	ssc-miR-378	mature	known	non-templated	pig	ssc-miR-378	NA		NA	NA	NA	NA
ACTGGACTTGGAGTCAGAAGGCAG	miRNA	ssc-miR-378	mature	known	non-templated	pig	ssc-miR-378	NA		NA	NA	NA	NA
ACTGGACTTGGAGTCAGAAGGCAT	miRNA	ssc-miR-378	mature	known	non-templated	pig	ssc-miR-378	NA		NA	NA	NA	NA
ACTGGACTTGGAGTCAGAAGGCG	miRNA	ssc-miR-378	mature	known	non-templated	pig	ssc-miR-378	NA		NA	NA	NA	NA
ACTGGACTTGGAGTCAGAAGGCGA	miRNA	ssc-miR-378	mature	known	non-templated	pig	ssc-miR-378	NA		NA	NA	NA	NA
ACTGGACTTGGAGTCAGAAGGG	miRNA	ssc-miR-378	mature	known	non-templated	pig	ssc-miR-378	NA		NA	NA	NA	ENST00000612936
ACTGGACTTGGAGTCAGAAGGT	miRNA	ssc-miR-378	mature	known	non-templated	pig	ssc-miR-378	NA		NA	NA	NA	ENST00000612936
ACTGGACTTGGAGTCAGGAGG	miRNA	hsa-miR-378e	mature	novel	non-templated	human	hsa-miR-378e	NA		NA	NA	NA	NA
ACTGGACTTGGAGTCAGGAGGC	miRNA	hsa-miR-378e	mature	novel	non-templated	human	hsa-miR-378e	NA		NA	NA	NA	NA
ACTGGACTTGGAGTCAGGAGGT	miRNA	hsa-miR-378e	mature	novel	non-templated	human	hsa-miR-378e	NA		NA	NA	NA	NA
ACTGGGCTTGGAGTCAGAAGG	miRNA	hsa-miR-378g	mature	novel	non-templated	human	hsa-miR-378g	NA		NA	NA	NA	NA
ACTGGGCTTGGAGTCAGAAGGC	miRNA	hsa-miR-378g	mature	novel	non-templated	human	hsa-miR-378g	NA		NA	NA	NA	NA
ACTGGGCTTGGAGTCAGAAGGT	miRNA	hsa-miR-378g	mature	novel	non-templated	human	hsa-miR-378g	NA		NA	NA	NA	NA
ACTGTACTCCAGCCTGGGCAACATAGCGAGACCCCGTCTCC	miRNA	ssc-miR-1285	mature	known	non-templated	pig	ssc-miR-1285	NA		NA	NA	NA	ENST00000618786,gene_biotype:misc_RNA,gene_symbol:RN7SL1
ACTGTACTCCAGCCTGGGCAACATAGCGAGACCCCGTCTCTA	miRNA	ssc-miR-1285	mature	known	non-templated	pig	ssc-miR-1285	NA		NA	NA	NA	ENST00000618786,gene_biotype:misc_RNA,gene_symbol:RN7SL1
ACTGTACTCCAGCCTGGGCAACATAGCGAGACCCCGTCTCTC	miRNA	ssc-miR-1285	mature	known	non-templated	pig	ssc-miR-1285	NA		NA	NA	NA	ENST00000618786,gene_biotype:misc_RNA,gene_symbol:RN7SL1
ACTGTACTCCAGCCTGGGCAACATAGCGAGACCCCGTCTCTG	miRNA	ssc-miR-1285	mature	known	non-templated	pig	ssc-miR-1285	NA		NA	NA	NA	ENST00000618786,gene_biotype:misc_RNA,gene_symbol:RN7SL1
ACTGTACTCCAGCCTGGGCAACATAGCGAGACCCCGTCTCTGA	miRNA	ssc-miR-1285	mature	known	non-templated	pig	ssc-miR-1285	NA		NA	NA	NA	ENST00000618786,gene_biotype:misc_RNA,gene_symbol:RN7SL1
ACTGTACTCCAGCCTGGGCAACATAGCGAGACCCCGTCTCTTA	miRNA	ssc-miR-1285	mature	known	non-templated	pig	ssc-miR-1285	NA		NA	NA	NA	ENST00000626159
ACTGTACTCCAGCCTGGGCAACATAGCGAGACCCCGTCTCTTC	miRNA	ssc-miR-1285	mature	known	non-templated	pig	ssc-miR-1285	NA		NA	NA	NA	ENST00000626159
ACTTAAACGTGGATGTACTTA	miRNA	hsa-miR-302a-5p	mature	novel	non-templated	human	hsa-miR-302a-5p	NA	NA	NA	NA	NA	NA
ACTTAAACGTGGATGTACTTGA	miRNA	hsa-miR-302a-5p	mature	novel	non-templated	human	hsa-miR-302a-5p	NA	NA	NA	NA	NA	NA
ACTTAAACGTGGATGTACTTGCA	miRNA	hsa-miR-302a-5p	mature	novel	non-templated	human	hsa-miR-302a-5p	NA	NA	NA	NA	NA	NA
ACTTAAACGTGGATGTACTTGCC	miRNA	hsa-miR-302a-5p	mature	novel	non-templated	human	hsa-miR-302a-5p	NA	NA	NA	NA	NA	NA
ACTTAAACGTGGATGTACTTGCG	miRNA	hsa-miR-302a-5p	mature	novel	non-templated	human	hsa-miR-302a-5p	NA	NA	NA	NA	NA	NA
ACTTAAACGTGGATGTACTTGCTA	miRNA	hsa-miR-302a-5p	mature	novel	non-templated	human	hsa-miR-302a-5p	NA		NA	NA	NA	NA
ACTTAAACGTGGATGTACTTGT	miRNA	hsa-miR-302a-5p	mature	novel	non-templated	human	hsa-miR-302a-5p	NA	NA	NA	NA	NA	NA
ACTTGTCCCGGCCTGC	miRNA	ssc-miR-92a	mature	known	non-templated	pig	ssc-miR-92a	NA	NA	NA	NA	NA	NA
AGAGATCAGAGGCGCAGAGC	miRNA	bta-miR-6529a	mature	novel	non-templated	cattle	bta-miR-6529a	NA		NA	NA	NA	ENST00000613558
AGAGGTAGTAGGTTGCATAGC	miRNA	ssc-let-7d-5p	mature	known	non-templated	pig	ssc-let-7d-5p	NA	NA	NA	NA	NA	NA
AGAGGTAGTAGGTTGCATAGTC	miRNA	ssc-let-7d-5p	mature	known	non-templated	pig	ssc-let-7d-5p	NA	NA	NA	NA	NA	NA
AGCAGCATTGTACAGGGCTATA	miRNA	ssc-miR-107	mature	known	non-templated	pig	ssc-miR-107	NA	NA	NA	NA	NA	NA
AGCAGCATTGTACAGGGCTATGAT	miRNA	ssc-miR-103	mature	known	non-templated	pig	ssc-miR-103	NA		NA	NA	NA	NA
AGCAGCATTGTACAGGGCTATGG	miRNA	ssc-miR-103	mature	known	non-templated	pig	ssc-miR-103	NA	NA	NA	NA	NA	NA
AGCAGCATTGTACAGGGCTATGT	miRNA	ssc-miR-103	mature	known	non-templated	pig	ssc-miR-103	NA	NA	NA	NA	NA	NA
AGCAGCATTGTACAGGGCTATT	miRNA	ssc-miR-107	mature	known	non-templated	pig	ssc-miR-107	NA	NA	NA	NA	NA	NA
AGCAGCGGGAACAGTACTGCAGA	miRNA	ssc-miR-503	mature	known	non-templated	pig	ssc-miR-503	NA	NA	NA	NA	NA	NA
AGCATGTGATGAAGCAAATCAGTATGAATAAAGTCGTGATACTGTAAACGCTTTCTGATG	miRNA	hsa-miR-3607-5p	mature	novel	non-templated	human	hsa-miR-3607-5p	NA		NA	NA	NA	NA
AGCTACATCTGGCTACTGGGTCTCA	miRNA	ssc-miR-222	mature	known	non-templated	pig	ssc-miR-222	NA		NA	NA	NA	NA
AGCTACATCTGGCTACTGGGTCTCC	miRNA	ssc-miR-222	mature	known	non-templated	pig	ssc-miR-222	NA		NA	NA	NA	NA
AGCTACATCTGGCTACTGGGTCTT	miRNA	ssc-miR-222	mature	known	non-templated	pig	ssc-miR-222	NA		NA	NA	NA	NA
AGCTACATTGTCTGCTGGGTTTCT	miRNA	ssc-miR-221-3p	mature	known	non-templated	pig	ssc-miR-221-3p	NA		NA	NA	NA	NA
AGCTACATTGTCTGCTGGGTTTT	miRNA	ssc-miR-221-3p	mature	known	non-templated	pig	ssc-miR-221-3p	NA		NA	NA	NA	NA
AGCTCGGTCTGAGGCCCCTA	miRNA	ssc-miR-423-3p	mature	known	non-templated	pig	ssc-miR-423-3p	NA		NA	NA	NA	ENST00000362201
AGCTCGGTCTGAGGCCCCTCAA	miRNA	ssc-miR-423-3p	mature	known	non-templated	pig	ssc-miR-423-3p	NA		NA	NA	NA	ENST00000362201
AGCTCGGTCTGAGGCCCCTCAGA	miRNA	ssc-miR-423-3p	mature	known	non-templated	pig	ssc-miR-423-3p	NA		NA	NA	NA	ENST00000362201
AGCTCGGTCTGAGGCCCCTCAGAA	miRNA	ssc-miR-423-3p	mature	known	non-templated	pig	ssc-miR-423-3p	NA		NA	NA	NA	ENST00000362201
AGCTCGGTCTGAGGCCCCTCAGC	miRNA	ssc-miR-423-3p	mature	known	non-templated	pig	ssc-miR-423-3p	NA		NA	NA	NA	ENST00000362201
AGCTCGGTCTGAGGCCCCTCAGG	miRNA	ssc-miR-423-3p	mature	known	non-templated	pig	ssc-miR-423-3p	NA		NA	NA	NA	ENST00000362201
AGCTCGGTCTGAGGCCCCTCAGTA	miRNA	ssc-miR-423-3p	mature	known	non-templated	pig	ssc-miR-423-3p	NA		NA	NA	NA	ENST00000362201
AGCTCGGTCTGAGGCCCCTCAGTAA	miRNA	ssc-miR-423-3p	mature	known	non-templated	pig	ssc-miR-423-3p	NA		NA	NA	NA	ENST00000362201
AGCTCGGTCTGAGGCCCCTCAGTAG	miRNA	ssc-miR-423-3p	mature	known	non-templated	pig	ssc-miR-423-3p	NA		NA	NA	NA	ENST00000362201
AGCTCGGTCTGAGGCCCCTCAGTG	miRNA	ssc-miR-423-3p	mature	known	non-templated	pig	ssc-miR-423-3p	NA		NA	NA	NA	ENST00000362201
AGCTCGGTCTGAGGCCCCTCAGTT	miRNA	ssc-miR-423-3p	mature	known	non-templated	pig	ssc-miR-423-3p	NA		NA	NA	NA	ENST00000362201
AGCTCGGTCTGAGGCCCCTT	miRNA	ssc-miR-423-3p	mature	known	non-templated	pig	ssc-miR-423-3p	NA		NA	NA	NA	ENST00000362201
AGCTGCCAGTTGAAGAACTGA	miRNA	ssc-miR-22-3p	mature	known	non-templated	pig	ssc-miR-22-3p	NA		NA	NA	NA	ENST00000334146,gene_biotype:lincRNA,gene_symbol:MIR22HG
AGCTGCCAGTTGAAGAACTGC	miRNA	ssc-miR-22-3p	mature	known	non-templated	pig	ssc-miR-22-3p	NA		NA	NA	NA	ENST00000334146,gene_biotype:lincRNA,gene_symbol:MIR22HG
AGCTGCCAGTTGAAGAACTGG	miRNA	ssc-miR-22-3p	mature	known	non-templated	pig	ssc-miR-22-3p	NA		NA	NA	NA	ENST00000334146,gene_biotype:lincRNA,gene_symbol:MIR22HG
AGCTGCCAGTTGAAGAACTGTA	miRNA	ssc-miR-22-3p	mature	known	non-templated	pig	ssc-miR-22-3p	NA		NA	NA	NA	ENST00000334146,gene_biotype:lincRNA,gene_symbol:MIR22HG
AGCTTATCAGACTGATGC	miRNA	ssc-miR-21	mature	known	non-templated	pig	ssc-miR-21	NA		NA	NA	NA	ENST00000362134
AGCTTATCAGACTGATGTTA	miRNA	ssc-miR-21	mature	known	non-templated	pig	ssc-miR-21	NA		NA	NA	NA	ENST00000362134
AGCTTATCAGACTGATGTTGAA	miRNA	ssc-miR-21	mature	known	non-templated	pig	ssc-miR-21	NA		NA	NA	NA	ENST00000362134
AGCTTATCAGACTGATGTTGACA	miRNA	bta-miR-21-5p	mature	novel	non-templated	cattle	bta-miR-21-5p	NA		NA	NA	NA	ENST00000362134
AGCTTATCAGACTGATGTTGACC	miRNA	bta-miR-21-5p	mature	novel	non-templated	cattle	bta-miR-21-5p	NA		NA	NA	NA	ENST00000362134
AGCTTATCAGACTGATGTTGACG	miRNA	bta-miR-21-5p	mature	novel	non-templated	cattle	bta-miR-21-5p	NA		NA	NA	NA	ENST00000362134
AGCTTATCAGACTGATGTTGAG	miRNA	ssc-miR-21	mature	known	non-templated	pig	ssc-miR-21	NA		NA	NA	NA	ENST00000362134
AGCTTATCAGACTGATGTTGAT	miRNA	ssc-miR-21	mature	known	non-templated	pig	ssc-miR-21	NA		NA	NA	NA	ENST00000362134
AGCTTATCAGACTGATGTTGCC	miRNA	ssc-miR-21	mature	known	non-templated	pig	ssc-miR-21	NA		NA	NA	NA	ENST00000362134
AGCTTATCAGACTGATGTTGCT	miRNA	ssc-miR-21	mature	known	non-templated	pig	ssc-miR-21	NA		NA	NA	NA	ENST00000362134
AGCTTATCAGACTGATGTTGG	miRNA	ssc-miR-21	mature	known	non-templated	pig	ssc-miR-21	NA		NA	NA	NA	ENST00000362134
AGCTTATCAGACTGATGTTGGC	miRNA	ssc-miR-21	mature	known	non-templated	pig	ssc-miR-21	NA		NA	NA	NA	ENST00000362134
AGCTTATCAGACTGATGTTGGT	miRNA	ssc-miR-21	mature	known	non-templated	pig	ssc-miR-21	NA		NA	NA	NA	ENST00000362134
AGCTTATCAGACTGATGTTGT	miRNA	ssc-miR-21	mature	known	non-templated	pig	ssc-miR-21	NA		NA	NA	NA	ENST00000362134
AGCTTATCAGACTGATGTTGTC	miRNA	ssc-miR-21	mature	known	non-templated	pig	ssc-miR-21	NA		NA	NA	NA	ENST00000362134
AGGAGCTCACAGTCTATTGAGA	miRNA	ssc-miR-28-5p	mature	known	non-templated	pig	ssc-miR-28-5p	NA	NA	NA	NA	NA	NA
AGGCAGTGTAGTTAGCTGAC	miRNA	ssc-miR-34c	mature	known	non-templated	pig	ssc-miR-34c	NA	NA	NA	NA	NA	NA
AGGCAGTGTAGTTAGCTGATA	miRNA	ssc-miR-34c	mature	known	non-templated	pig	ssc-miR-34c	NA	NA	NA	NA	NA	NA
AGGCAGTGTAGTTAGCTGATC	miRNA	ssc-miR-34c	mature	known	non-templated	pig	ssc-miR-34c	NA	NA	NA	NA	NA	NA
AGGCAGTGTAGTTAGCTGATTA	miRNA	ssc-miR-34c	mature	known	non-templated	pig	ssc-miR-34c	NA	NA	NA	NA	NA	NA
AGGCAGTGTAGTTAGCTGATTGA	miRNA	ssc-miR-34c	mature	known	non-templated	pig	ssc-miR-34c	NA		NA	NA	NA	NA
AGGCAGTGTAGTTAGCTGATTGCA	miRNA	ssc-miR-34c	mature	known	non-templated	pig	ssc-miR-34c	NA		NA	NA	NA	NA
AGGCAGTGTAGTTAGCTGATTGT	miRNA	ssc-miR-34c	mature	known	non-templated	pig	ssc-miR-34c	NA		NA	NA	NA	NA
AGGCAGTGTATTGTTAGCTGGT	miRNA	bta-miR-449b	mature	novel	non-templated	cattle	bta-miR-449b	NA	NA	NA	NA	NA	NA
AGGCGGAGACTTGGGCAATTGCC	miRNA	hsa-miR-25-5p	mature	novel	non-templated	human	hsa-miR-25-5p	NA		NA	NA	NA	NA
AGGGTTGGGCGGAGGCTTTCA	miRNA	ssc-miR-296-3p	mature	known	non-templated	pig	ssc-miR-296-3p	NA	NA	NA	NA	NA	NA
AGGGTTGGGCGGAGGCTTTCCA	miRNA	ssc-miR-296-3p	mature	known	non-templated	pig	ssc-miR-296-3p	NA		NA	NA	NA	NA
AGGGTTGGGCGGAGGCTTTCCC	miRNA	ssc-miR-296-3p	mature	known	non-templated	pig	ssc-miR-296-3p	NA		NA	NA	NA	NA
AGGGTTGGGCGGAGGCTTTCCG	miRNA	ssc-miR-296-3p	mature	known	non-templated	pig	ssc-miR-296-3p	NA		NA	NA	NA	NA
AGGGTTGGGCGGAGGCTTTCT	miRNA	ssc-miR-296-3p	mature	known	non-templated	pig	ssc-miR-296-3p	NA	NA	NA	NA	NA	NA
AGGTTGGGATCGGTTGCAATGCA	miRNA	hsa-miR-92a-1-5p	mature	novel	non-templated	human	hsa-miR-92a-1-5p	NA		NA	NA	NA	ENST00000385233,gene_biotype:processed_transcript,gene_symbol:MIR17HG
AGGTTGGGATCGGTTGCAATGCC	miRNA	hsa-miR-92a-1-5p	mature	novel	non-templated	human	hsa-miR-92a-1-5p	NA		NA	NA	NA	ENST00000385233,gene_biotype:processed_transcript,gene_symbol:MIR17HG
AGTGCTTCCATGTTTCAGTGGC	miRNA	bta-miR-302c	mature	novel	non-templated	cattle	bta-miR-302c	NA	NA	NA	NA	NA	NA
AGTGCTTCCATGTTTCAGTGGT	miRNA	bta-miR-302c	mature	novel	non-templated	cattle	bta-miR-302c	NA	NA	NA	NA	NA	NA
AGTGCTTCCATGTTTTAGTGT	miRNA	bta-miR-302a	mature	novel	non-templated	cattle	bta-miR-302a	NA		NA	NA	NA	ENST00000362188,gene_biotype:antisense,gene_symbol:MIR302B
ATACAGTACTGTGATAACTGAA	miRNA	ssc-miR-101	mature	known	non-templated	pig	ssc-miR-101	NA		NA	NA	NA	NA
ATAGCCACTGTACTCCAGCCTGGGCAACATAGCGAGACCCCGTCTCTA	miRNA	ssc-miR-1285	mature	known	non-templated	pig	ssc-miR-1285	NA		NA	NA	NA	ENST00000618786,gene_biotype:misc_RNA,gene_symbol:RN7SL1
ATAGCCACTGTACTCCAGCCTGGGCAACATAGCGAGACCCCGTCTCTC	miRNA	ssc-miR-1285	mature	known	non-templated	pig	ssc-miR-1285	NA		NA	NA	NA	ENST00000618786,gene_biotype:misc_RNA,gene_symbol:RN7SL1
ATAGCCACTGTACTCCAGCCTGGGCAACATAGCGAGACCCCGTCTCTTA	miRNA	ssc-miR-1285	mature	known	non-templated	pig	ssc-miR-1285	NA		NA	NA	NA	ENST00000626159
ATAGCTTATCAGACTGATGTTGAC	miRNA	ssc-miR-21	mature	known	non-templated	pig	ssc-miR-21	NA		NA	NA	NA	ENST00000362134
ATATAATACAACCTGCTAAGTA	miRNA	ssc-miR-374b-5p	mature	known	non-templated	pig	ssc-miR-374b-5p	NA	NA	NA	NA	NA	NA
ATATATTAAATGGATTTTTGGAGCC	miRNA	bta-miR-1246	mature	novel	non-templated	cattle	bta-miR-1246	NA		NA	NA	NA	ENST00000410144,gene_biotype:snRNA,gene_symbol:RNU2-3P
ATATATTAAATGGATTTTTGGAGCT	miRNA	bta-miR-1246	mature	novel	non-templated	cattle	bta-miR-1246	NA		NA	NA	NA	ENST00000410144,gene_biotype:snRNA,gene_symbol:RNU2-3P
ATATATTAAATGGATTTTTGGAGT	miRNA	bta-miR-1246	mature	novel	non-templated	cattle	bta-miR-1246	NA		NA	NA	NA	ENST00000410144,gene_biotype:snRNA,gene_symbol:RNU2-3P
ATCAACAGACATTAATTGGGCGT	miRNA	ssc-miR-421-3p	mature	known	non-templated	pig	ssc-miR-421-3p	NA	NA	NA	NA	NA	NA
ATCACATTGCCAGGGATTACCACC	miRNA	ssc-miR-23b	mature	known	non-templated	pig	ssc-miR-23b	NA		NA	NA	NA	NA
ATCACATTGCCAGGGATTACCACT	miRNA	ssc-miR-23b	mature	known	non-templated	pig	ssc-miR-23b	NA		NA	NA	NA	NA
ATCACATTGCCAGGGATTACT	miRNA	ssc-miR-23b	mature	known	non-templated	pig	ssc-miR-23b	NA	NA	NA	NA	NA	NA
ATCACATTGCCAGGGATTTCT	miRNA	ssc-miR-23a	mature	known	non-templated	pig	ssc-miR-23a	NA	NA	NA	NA	NA	NA
ATCACTAACCACACGGCCAGA	miRNA	hsa-miR-34c-3p	mature	novel	non-templated	human	hsa-miR-34c-3p	NA	NA	NA	NA	NA	NA
ATCAGACTGATGTTGACA	miRNA	bta-miR-21-5p	mature	novel	non-templated	cattle	bta-miR-21-5p	NA		NA	NA	NA	ENST00000362134
ATCAGACTGATGTTGACC	miRNA	bta-miR-21-5p	mature	novel	non-templated	cattle	bta-miR-21-5p	NA		NA	NA	NA	ENST00000362134
ATCAGACTGATGTTGAT	miRNA	ssc-miR-21	mature	known	non-templated	pig	ssc-miR-21	NA	NA	NA	NA	NA	NA
ATCCCAGCGGTGCCTCCA	miRNA	hsa-miR-5100	mature	novel	non-templated	human	hsa-miR-5100	NA	NA	NA	NA	NA	NA
ATCCTTGACTGGAAGCC	miRNA	ssc-miR-30e-5p	mature	known	non-templated	pig	ssc-miR-30e-5p	NA	NA	NA	NA	NA	NA
ATCTTACCGGACAGTGCTGGAA	miRNA	hsa-miR-200a-5p	mature	novel	non-templated	human	hsa-miR-200a-5p	NA	NA	NA	NA	NA	NA
ATGAATAAAGTCGTGATACTGTAAACGCTTTCTGATG	miRNA	hsa-miR-3607-3p	mature	novel	non-templated	human	hsa-miR-3607-3p	NA		NA	NA	NA	NA
ATGAATAAAGTCGTGATACTGTAAACGCTTTCTGATGTA	miRNA	hsa-miR-3607-3p	mature	novel	non-templated	human	hsa-miR-3607-3p	NA		NA	NA	NA	NA
ATGCCTTGAGTGTAGGACCGC	miRNA	ssc-miR-532-5p	mature	known	non-templated	pig	ssc-miR-532-5p	NA	NA	NA	NA	NA	NA
ATGCGGAACCTGCGGATACGA	miRNA	ssc-miR-7134-3p	mature	known	non-templated	pig	ssc-miR-7134-3p	NA	NA	NA	NA	NA	NA
ATGCGGAACCTGCGGATACGC	miRNA	ssc-miR-7134-3p	mature	known	non-templated	pig	ssc-miR-7134-3p	NA	NA	NA	NA	NA	NA
ATGCGGAACCTGCGGATACGGA	miRNA	ssc-miR-7134-3p	mature	known	non-templated	pig	ssc-miR-7134-3p	NA		NA	NA	NA	NA
ATGCGGAACCTGCGGATACGGT	miRNA	ssc-miR-7134-3p	mature	known	non-templated	pig	ssc-miR-7134-3p	NA		NA	NA	NA	NA
ATGCGGAACCTGCGGATACGT	miRNA	ssc-miR-7134-3p	mature	known	non-templated	pig	ssc-miR-7134-3p	NA	NA	NA	NA	NA	NA
ATGGCACTGGTAGAATTCACA	miRNA	ssc-miR-183	mature	known	non-templated	pig	ssc-miR-183	NA	NA	NA	NA	NA	NA
ATGGCACTGGTAGAATTCACC	miRNA	ssc-miR-183	mature	known	non-templated	pig	ssc-miR-183	NA	NA	NA	NA	NA	NA
ATGGCACTGGTAGAATTCACG	miRNA	ssc-miR-183	mature	known	non-templated	pig	ssc-miR-183	NA	NA	NA	NA	NA	NA
ATGGCACTGGTAGAATTCACTA	miRNA	ssc-miR-183	mature	known	non-templated	pig	ssc-miR-183	NA	NA	NA	NA	NA	NA
ATGGCACTGGTAGAATTCACTT	miRNA	ssc-miR-183	mature	known	non-templated	pig	ssc-miR-183	NA	NA	NA	NA	NA	NA
ATGGCCCTGACTGAAGACCTGCAGTC	miRNA	bta-miR-1291	mature	novel	non-templated	cattle	bta-miR-1291	NA		NA	NA	NA	ENST00000408564,gene_biotype:snoRNA,gene_symbol:SNORA2C
ATGGCCCTGACTGAAGACCTGCAGTT	miRNA	bta-miR-1291	mature	novel	non-templated	cattle	bta-miR-1291	NA		NA	NA	NA	ENST00000408564,gene_biotype:snoRNA,gene_symbol:SNORA2C
ATGTACTCCAGCCTGGGCAACATAGCGAGACCCCGTCTCTT	miRNA	ssc-miR-1285	mature	known	non-templated	pig	ssc-miR-1285	NA		NA	NA	NA	ENST00000626159
ATGTCCGCGGGTTCCCTATCCT	miRNA	ssc-miR-7134-5p	mature	known	non-templated	pig	ssc-miR-7134-5p	NA		NA	NA	NA	NA
ATGTCCGCGGGTTCCCTATCT	miRNA	ssc-miR-7134-5p	mature	known	non-templated	pig	ssc-miR-7134-5p	NA	NA	NA	NA	NA	NA
ATTGCACTCGTCCCGGCCTCA	miRNA	ssc-miR-92b-3p	mature	known	non-templated	pig	ssc-miR-92b-3p	NA		NA	NA	NA	ENST00000607575,gene_biotype:antisense,gene_symbol:MIR92B
ATTGCACTCGTCCCGGCCTCCT	miRNA	ssc-miR-92b-3p	mature	known	non-templated	pig	ssc-miR-92b-3p	NA		NA	NA	NA	ENST00000607575,gene_biotype:antisense,gene_symbol:MIR92B
ATTGCACTCGTCCCGGCCTCT	miRNA	ssc-miR-92b-3p	mature	known	non-templated	pig	ssc-miR-92b-3p	NA		NA	NA	NA	ENST00000607575,gene_biotype:antisense,gene_symbol:MIR92B
ATTGCACTTGTCCCGGCCTGA	miRNA	ssc-miR-92a	mature	known	non-templated	pig	ssc-miR-92a	NA		NA	NA	NA	ENST00000385233,gene_biotype:processed_transcript,gene_symbol:MIR17HG
ATTGCACTTGTCCCGGCCTGC	miRNA	ssc-miR-92a	mature	known	non-templated	pig	ssc-miR-92a	NA		NA	NA	NA	ENST00000385233,gene_biotype:processed_transcript,gene_symbol:MIR17HG
ATTGCACTTGTCCCGGCCTGG	miRNA	ssc-miR-92a	mature	known	non-templated	pig	ssc-miR-92a	NA		NA	NA	NA	ENST00000385233,gene_biotype:processed_transcript,gene_symbol:MIR17HG
ATTGCACTTGTCCCGGCCTGTA	miRNA	ssc-miR-92a	mature	known	non-templated	pig	ssc-miR-92a	NA		NA	NA	NA	ENST00000385233,gene_biotype:processed_transcript,gene_symbol:MIR17HG
ATTGCACTTGTCTCGGTCTGAA	miRNA	bta-miR-25	mature	novel	non-templated	cattle	bta-miR-25	NA	NA	NA	NA	NA	NA
ATTGCACTTGTCTCGGTCTGT	miRNA	bta-miR-25	mature	novel	non-templated	cattle	bta-miR-25	NA	NA	NA	NA	NA	NA
ATTGTTCTCCAACCTGGCTCC	miRNA	ssc-miR-7857-3p	mature	known	non-templated	pig	ssc-miR-7857-3p	NA	NA	NA	NA	NA	NA
ATTGTTCTCCAACCTGGCTCTA	miRNA	ssc-miR-7857-3p	mature	known	non-templated	pig	ssc-miR-7857-3p	NA	NA	NA	NA	NA	NA
ATTGTTCTCCAACCTGGCTCTC	miRNA	ssc-miR-7857-3p	mature	known	non-templated	pig	ssc-miR-7857-3p	NA	NA	NA	NA	NA	NA
ATTGTTCTCCAACCTGGCTCTTA	miRNA	ssc-miR-7857-3p	mature	known	non-templated	pig	ssc-miR-7857-3p	NA		NA	NA	NA	NA
ATTGTTCTCCAACCTGGCTCTTC	miRNA	ssc-miR-7857-3p	mature	known	non-templated	pig	ssc-miR-7857-3p	NA		NA	NA	NA	NA
ATTGTTCTCCAACCTGGCTCTTTT	miRNA	ssc-miR-7857-3p	mature	known	non-templated	pig	ssc-miR-7857-3p	NA		NA	NA	NA	NA
CAAAACGTGAGGCGCTGCTAC	miRNA	ssc-miR-424-3p	mature	known	non-templated	pig	ssc-miR-424-3p	NA		NA	NA	NA	ENST00000362227,gene_biotype:lincRNA,gene_symbol:MIR503HG
CAAAACGTGAGGCGCTGCTATAA	miRNA	ssc-miR-424-3p	mature	known	non-templated	pig	ssc-miR-424-3p	NA		NA	NA	NA	ENST00000362227,gene_biotype:lincRNA,gene_symbol:MIR503HG
CAAACTGTGGGGGCACTTTG	miRNA	ssc-miR-371-5p	mature	known	non-templated	pig	ssc-miR-371-5p	NA	NA	NA	NA	NA	NA
CAAAGAATTCTCCTTTTGGGCA	miRNA	ssc-miR-186	mature	known	non-templated	pig	ssc-miR-186	NA	NA	NA	NA	NA	NA
CAAAGAATTCTCCTTTTGGGCC	miRNA	ssc-miR-186	mature	known	non-templated	pig	ssc-miR-186	NA	NA	NA	NA	NA	NA
CAAAGAATTCTCCTTTTGGGCTC	miRNA	ssc-miR-186	mature	known	non-templated	pig	ssc-miR-186	NA		NA	NA	NA	NA
CAAAGAATTCTCCTTTTGGGT	miRNA	ssc-miR-186	mature	known	non-templated	pig	ssc-miR-186	NA	NA	NA	NA	NA	NA
CAAAGTGCTGTTCGTGCAGGTAA	miRNA	bta-miR-93	mature	novel	non-templated	cattle	bta-miR-93	NA		NA	NA	NA	NA
CAAAGTGCTGTTCGTGCAGGTAGA	miRNA	bta-miR-93	mature	novel	non-templated	cattle	bta-miR-93	NA		NA	NA	NA	NA
CAAAGTGCTTACAGTGCAGGC	miRNA	ssc-miR-17-5p	mature	known	non-templated	pig	ssc-miR-17-5p	NA		NA	NA	NA	ENST00000385012,gene_biotype:processed_transcript,gene_symbol:MIR17HG
CAAAGTGCTTACAGTGCAGGTAA	miRNA	ssc-miR-17-5p	mature	known	non-templated	pig	ssc-miR-17-5p	NA		NA	NA	NA	ENST00000385012,gene_biotype:processed_transcript,gene_symbol:MIR17HG
CAAAGTGCTTACAGTGCAGGTAGA	miRNA	ssc-miR-17-5p	mature	known	non-templated	pig	ssc-miR-17-5p	NA		NA	NA	NA	ENST00000385012,gene_biotype:processed_transcript,gene_symbol:MIR17HG
CAAAGTGCTTACAGTGCAGGTAGAA	miRNA	ssc-miR-17-5p	mature	known	non-templated	pig	ssc-miR-17-5p	NA		NA	NA	NA	ENST00000385012,gene_biotype:processed_transcript,gene_symbol:MIR17HG
CAAAGTGCTTACAGTGCAGGTAGG	miRNA	ssc-miR-17-5p	mature	known	non-templated	pig	ssc-miR-17-5p	NA		NA	NA	NA	ENST00000385012,gene_biotype:processed_transcript,gene_symbol:MIR17HG
CAACCCGTAGATCCGATCTTGT	miRNA	ssc-miR-99a	mature	known	non-templated	pig	ssc-miR-99a	NA		NA	NA	NA	NA
CAACGGAATCCCAAAAGCAGCA	miRNA	ssc-miR-191	mature	known	non-templated	pig	ssc-miR-191	NA	NA	NA	NA	NA	NA
CAACGGAATCCCAAAAGCAGCC	miRNA	ssc-miR-191	mature	known	non-templated	pig	ssc-miR-191	NA	NA	NA	NA	NA	NA
CAACGGAATCCCAAAAGCAGCG	miRNA	ssc-miR-191	mature	known	non-templated	pig	ssc-miR-191	NA	NA	NA	NA	NA	NA
CAACGGAATCCCAAAAGCAGCTA	miRNA	ssc-miR-191	mature	known	non-templated	pig	ssc-miR-191	NA	NA	NA	NA	NA	NA
CAACGGAATCCCAAAAGCAGCTC	miRNA	ssc-miR-191	mature	known	non-templated	pig	ssc-miR-191	NA	NA	NA	NA	NA	NA
CAACGGAATCCCAAAAGCAGCTGA	miRNA	ssc-miR-191	mature	known	non-templated	pig	ssc-miR-191	NA		NA	NA	NA	NA
CAACGGAATCCCAAAAGCAGCTGC	miRNA	ssc-miR-191	mature	known	non-templated	pig	ssc-miR-191	NA		NA	NA	NA	NA
CAACGGAATCCCAAAAGCAGCTGG	miRNA	ssc-miR-191	mature	known	non-templated	pig	ssc-miR-191	NA		NA	NA	NA	NA
CAACGGAATCCCAAAAGCAGCTT	miRNA	ssc-miR-191	mature	known	non-templated	pig	ssc-miR-191	NA	NA	NA	NA	NA	NA
CAACGGAATCCCAAAAGCAGT	miRNA	ssc-miR-191	mature	known	non-templated	pig	ssc-miR-191	NA	NA	NA	NA	NA	NA
CAAGTGCTTCCATGTTTTAGA	miRNA	bta-miR-302a	mature	novel	non-templated	cattle	bta-miR-302a	NA		NA	NA	NA	ENST00000362188,gene_biotype:antisense,gene_symbol:MIR302B
CAAGTGCTTCCATGTTTTAGC	miRNA	bta-miR-302a	mature	novel	non-templated	cattle	bta-miR-302a	NA		NA	NA	NA	ENST00000362188,gene_biotype:antisense,gene_symbol:MIR302B
CAAGTGCTTCCATGTTTTAGG	miRNA	bta-miR-302a	mature	novel	non-templated	cattle	bta-miR-302a	NA		NA	NA	NA	ENST00000362188,gene_biotype:antisense,gene_symbol:MIR302B
CAAGTGCTTCCATGTTTTAGTA	miRNA	bta-miR-302a	mature	novel	non-templated	cattle	bta-miR-302a	NA		NA	NA	NA	ENST00000362188,gene_biotype:antisense,gene_symbol:MIR302B
CAAGTGCTTCCATGTTTTAGTG	miRNA	bta-miR-302a	mature	novel	non-templated	cattle	bta-miR-302a	NA		NA	NA	NA	ENST00000362188,gene_biotype:antisense,gene_symbol:MIR302B
CAAGTGCTTCCATGTTTTAGTGA	miRNA	bta-miR-302a	mature	novel	non-templated	cattle	bta-miR-302a	NA		NA	NA	NA	NA
CAAGTGCTTCCATGTTTTAGTGAA	miRNA	bta-miR-302a	mature	novel	non-templated	cattle	bta-miR-302a	NA		NA	NA	NA	NA
CAAGTGCTTCCATGTTTTAGTGC	miRNA	bta-miR-302a	mature	novel	non-templated	cattle	bta-miR-302a	NA	NA	NA	NA	NA	NA
CAAGTGCTTCCATGTTTTAGTGG	miRNA	bta-miR-302a	mature	novel	non-templated	cattle	bta-miR-302a	NA	NA	NA	NA	NA	NA
CAAGTGCTTCCATGTTTTAGTGT	miRNA	bta-miR-302a	mature	novel	non-templated	cattle	bta-miR-302a	NA	NA	NA	NA	NA	NA
CAATGGATTTTTGGAGCT	miRNA	bta-miR-1246	mature	novel	non-templated	cattle	bta-miR-1246	NA		NA	NA	NA	ENST00000410666,gene_biotype:snRNA,gene_symbol:RNU2-49P
CACCCGTAGAACCGACCTTGCA	miRNA	ssc-miR-99b	mature	known	non-templated	pig	ssc-miR-99b	NA	NA	NA	NA	NA	NA
CACCCGTAGAACCGACCTTGCC	miRNA	ssc-miR-99b	mature	known	non-templated	pig	ssc-miR-99b	NA	NA	NA	NA	NA	NA
CACCCGTAGAACCGACCTTGCGA	miRNA	ssc-miR-99b	mature	known	non-templated	pig	ssc-miR-99b	NA		NA	NA	NA	NA
CACCCGTAGAACCGACCTTGCGT	miRNA	ssc-miR-99b	mature	known	non-templated	pig	ssc-miR-99b	NA		NA	NA	NA	NA
CACCCGTAGAACCGACCTTGCT	miRNA	ssc-miR-99b	mature	known	non-templated	pig	ssc-miR-99b	NA	NA	NA	NA	NA	NA
CACCCGTAGAACCGACCTTGT	miRNA	ssc-miR-99b	mature	known	non-templated	pig	ssc-miR-99b	NA	NA	NA	NA	NA	NA
CACTAGATTGTGAGCTCCTGGAA	miRNA	ssc-miR-28-3p	mature	known	non-templated	pig	ssc-miR-28-3p	NA		NA	NA	NA	NA
CACTAGATTGTGAGCTCCTGGAAA	miRNA	ssc-miR-28-3p	mature	known	non-templated	pig	ssc-miR-28-3p	NA		NA	NA	NA	NA
CACTGGACTTGGAGTCAGAAGGT	miRNA	ssc-miR-378	mature	known	non-templated	pig	ssc-miR-378	NA		NA	NA	NA	ENST00000582688
CACTGTACTCCAGCCTGGGCAACATAGCGAGACCCCGTCTCTA	miRNA	ssc-miR-1285	mature	known	non-templated	pig	ssc-miR-1285	NA		NA	NA	NA	ENST00000618786,gene_biotype:misc_RNA,gene_symbol:RN7SL1
CACTGTACTCCAGCCTGGGCAACATAGCGAGACCCCGTCTCTC	miRNA	ssc-miR-1285	mature	known	non-templated	pig	ssc-miR-1285	NA		NA	NA	NA	ENST00000618786,gene_biotype:misc_RNA,gene_symbol:RN7SL1
CACTGTACTCCAGCCTGGGCAACATAGCGAGACCCCGTCTCTTA	miRNA	ssc-miR-1285	mature	known	non-templated	pig	ssc-miR-1285	NA		NA	NA	NA	ENST00000626159
CAGCAGCAATTCATGTTTTGAAA	miRNA	ssc-miR-424-5p	mature	known	non-templated	pig	ssc-miR-424-5p	NA		NA	NA	NA	ENST00000362227,gene_biotype:lincRNA,gene_symbol:MIR503HG
CAGCAGCAATTCATGTTTTGAAC	miRNA	ssc-miR-424-5p	mature	known	non-templated	pig	ssc-miR-424-5p	NA		NA	NA	NA	ENST00000362227,gene_biotype:lincRNA,gene_symbol:MIR503HG
CAGCTCGGTCTGAGGCCCCTCAGC	miRNA	ssc-miR-423-3p	mature	known	non-templated	pig	ssc-miR-423-3p	NA		NA	NA	NA	ENST00000362201
CAGCTCGGTCTGAGGCCCCTCAGT	miRNA	ssc-miR-423-3p	mature	known	non-templated	pig	ssc-miR-423-3p	NA		NA	NA	NA	ENST00000362201
CAGTGCAATGTTAAAAGGGCATA	miRNA	ssc-miR-130a	mature	known	non-templated	pig	ssc-miR-130a	NA		NA	NA	NA	NA
CAGTGCACTACAGAACTTTGA	miRNA	ssc-miR-148a-3p	mature	known	non-templated	pig	ssc-miR-148a-3p	NA	NA	NA	NA	NA	NA
CAGTGCACTACAGAACTTTGC	miRNA	ssc-miR-148a-3p	mature	known	non-templated	pig	ssc-miR-148a-3p	NA	NA	NA	NA	NA	NA
CAGTGCACTACAGAACTTTGG	miRNA	ssc-miR-148a-3p	mature	known	non-templated	pig	ssc-miR-148a-3p	NA	NA	NA	NA	NA	NA
CAGTGCACTACAGAACTTTGTA	miRNA	ssc-miR-148a-3p	mature	known	non-templated	pig	ssc-miR-148a-3p	NA	NA	NA	NA	NA	NA
CAGTGCATCACAGAACTTTGC	miRNA	ssc-miR-148b-3p	mature	known	non-templated	pig	ssc-miR-148b-3p	NA	NA	NA	NA	NA	NA
CAGTGCATCACAGAACTTTGTA	miRNA	ssc-miR-148b-3p	mature	known	non-templated	pig	ssc-miR-148b-3p	NA	NA	NA	NA	NA	NA
CAGTGCATCACAGAACTTTGTT	miRNA	ssc-miR-148b-3p	mature	known	non-templated	pig	ssc-miR-148b-3p	NA	NA	NA	NA	NA	NA
CAGTGCATGACAGAACTTGGT	miRNA	ssc-miR-152	mature	known	non-templated	pig	ssc-miR-152	NA	NA	NA	NA	NA	NA
CAGTGGTTTTACCCTATGGTAA	miRNA	ssc-miR-140-5p	mature	known	non-templated	pig	ssc-miR-140-5p	NA	NA	NA	NA	NA	NA
CATAGCCACTGTACTCCAGCCTGGGCAACATAGCGAGACCCCGTCTCTT	miRNA	ssc-miR-1285	mature	known	non-templated	pig	ssc-miR-1285	NA		NA	NA	NA	ENST00000626159
CATCTTACCGGACAGTGCTGGAA	miRNA	hsa-miR-200a-5p	mature	novel	non-templated	human	hsa-miR-200a-5p	NA		NA	NA	NA	NA
CATCTTACCGGACAGTGCTGGG	miRNA	hsa-miR-200a-5p	mature	novel	non-templated	human	hsa-miR-200a-5p	NA	NA	NA	NA	NA	NA
CATCTTACCGGACAGTGCTGGT	miRNA	hsa-miR-200a-5p	mature	novel	non-templated	human	hsa-miR-200a-5p	NA	NA	NA	NA	NA	NA
CATCTTACTGGGCAGCATTGGAA	miRNA	hsa-miR-200b-5p	mature	novel	non-templated	human	hsa-miR-200b-5p	NA		NA	NA	NA	NA
CATGACACGATCACTCCCGTTGAGT	miRNA	bta-miR-425-5p	mature	novel	non-templated	cattle	bta-miR-425-5p	NA		NA	NA	NA	NA
CATGCCTTGAGTGTAGGACCA	miRNA	ssc-miR-532-5p	mature	known	non-templated	pig	ssc-miR-532-5p	NA	NA	NA	NA	NA	NA
CATGCCTTGAGTGTAGGACCGA	miRNA	ssc-miR-532-5p	mature	known	non-templated	pig	ssc-miR-532-5p	NA	NA	NA	NA	NA	NA
CATGCCTTGAGTGTAGGACCGC	miRNA	ssc-miR-532-5p	mature	known	non-templated	pig	ssc-miR-532-5p	NA	NA	NA	NA	NA	NA
CATGCCTTGAGTGTAGGACCGG	miRNA	ssc-miR-532-5p	mature	known	non-templated	pig	ssc-miR-532-5p	NA	NA	NA	NA	NA	NA
CATGCCTTGAGTGTAGGACCGTA	miRNA	ssc-miR-532-5p	mature	known	non-templated	pig	ssc-miR-532-5p	NA		NA	NA	NA	NA
CATGCCTTGAGTGTAGGACCT	miRNA	ssc-miR-532-5p	mature	known	non-templated	pig	ssc-miR-532-5p	NA	NA	NA	NA	NA	NA
CATGTCCGCGGGTTCCCTATCC	miRNA	ssc-miR-7134-5p	mature	known	non-templated	pig	ssc-miR-7134-5p	NA		NA	NA	NA	NA
CATGTGATGAAGCAAATCAGTATGAATAAAGTCGTGATACTGTAAACGCTTTCTGATG	miRNA	hsa-miR-3607-3p	mature	novel	non-templated	human	hsa-miR-3607-3p	NA		NA	NA	NA	NA
CATTGCACTTGTCTCGGTCTGAA	miRNA	bta-miR-25	mature	novel	non-templated	cattle	bta-miR-25	NA		NA	NA	NA	NA
CATTGCACTTGTCTCGGTCTGAAA	miRNA	bta-miR-25	mature	novel	non-templated	cattle	bta-miR-25	NA		NA	NA	NA	NA
CATTGCACTTGTCTCGGTCTGAAAA	miRNA	bta-miR-25	mature	novel	non-templated	cattle	bta-miR-25	NA		NA	NA	NA	NA
CATTGCACTTGTCTCGGTCTGAAT	miRNA	bta-miR-25	mature	novel	non-templated	cattle	bta-miR-25	NA		NA	NA	NA	NA
CATTGCACTTGTCTCGGTCTGAT	miRNA	bta-miR-25	mature	novel	non-templated	cattle	bta-miR-25	NA		NA	NA	NA	NA
CATTGCACTTGTCTCGGTCTGC	miRNA	bta-miR-25	mature	novel	non-templated	cattle	bta-miR-25	NA	NA	NA	NA	NA	NA
CATTGCACTTGTCTCGGTCTGG	miRNA	bta-miR-25	mature	novel	non-templated	cattle	bta-miR-25	NA	NA	NA	NA	NA	NA
CATTGCACTTGTCTCGGTCTGT	miRNA	bta-miR-25	mature	novel	non-templated	cattle	bta-miR-25	NA	NA	NA	NA	NA	NA
CCCCCAGGTGTGATTCTGATTTGT	miRNA	ssc-miR-361-3p	mature	known	non-templated	pig	ssc-miR-361-3p	NA	NA	NA	NA	NA	NA
CCCTGTAGAACCGAATTTGTA	miRNA	ssc-miR-10b	mature	known	non-templated	pig	ssc-miR-10b	NA	NA	NA	NA	NA	NA
CCCTGTAGAACCGAATTTGTGC	miRNA	bta-miR-10b	mature	novel	non-templated	cattle	bta-miR-10b	NA	NA	NA	NA	NA	NA
CCCTGTAGATCCGAATTTGC	miRNA	ssc-miR-10a-5p	mature	known	non-templated	pig	ssc-miR-10a-5p	NA		NA	NA	NA	ENST00000385043,gene_biotype:sense_intronic,gene_symbol:MIR10A
CCCTGTAGATCCGAATTTGTA	miRNA	ssc-miR-10a-5p	mature	known	non-templated	pig	ssc-miR-10a-5p	NA		NA	NA	NA	ENST00000385043,gene_biotype:sense_intronic,gene_symbol:MIR10A
CCCTGTAGATCCGAATTTGTGA	miRNA	bta-miR-10a	mature	novel	non-templated	cattle	bta-miR-10a	NA		NA	NA	NA	ENST00000385043,gene_biotype:sense_intronic,gene_symbol:MIR10A
CCGCACTGTGGGTACTTGCTGCA	miRNA	hsa-miR-106b-3p	mature	novel	non-templated	human	hsa-miR-106b-3p	NA		NA	NA	NA	NA
CCGTCCTAAGGTTGTTGAGTTT	miRNA	ssc-miR-676-3p	mature	known	non-templated	pig	ssc-miR-676-3p	NA		NA	NA	NA	NA
CCTGAACTAGGGGTCTGGAGT	miRNA	ssc-miR-345-3p	mature	known	non-templated	pig	ssc-miR-345-3p	NA		NA	NA	NA	NA
CCTGAGTGGCTCTAGTGATGAGCAAACTGAGCCTCTAAGAAGTTGACTGAAG	miRNA	hsa-miR-3653-3p	mature	novel	non-templated	human	hsa-miR-3653-3p	NA		NA	NA	NA	NA
CCTGGACTTGGAGTCAGAAGG	miRNA	bta-miR-378d	mature	novel	non-templated	cattle	bta-miR-378d	NA		NA	NA	NA	ENST00000612936
CCTGTACTCCAGCCTGGGCAACATAGCGAGACCCCGTCTCTA	miRNA	ssc-miR-1285	mature	known	non-templated	pig	ssc-miR-1285	NA		NA	NA	NA	NA
CCTGTACTCCAGCCTGGGCAACATAGCGAGACCCCGTCTCTT	miRNA	ssc-miR-1285	mature	known	non-templated	pig	ssc-miR-1285	NA		NA	NA	NA	NA
CCTGTACTCCAGCCTGGGCAACATAGCGAGACCCCGTCTCTTA	miRNA	ssc-miR-1285	mature	known	non-templated	pig	ssc-miR-1285	NA		NA	NA	NA	NA
CCTTCATTCCACCGGAGTCTGA	miRNA	ssc-miR-205	mature	known	non-templated	pig	ssc-miR-205	NA		NA	NA	NA	ENST00000384891,gene_biotype:processed_transcript,gene_symbol:MIR205HG
CCTTCATTCCACCGGAGTCTGT	miRNA	ssc-miR-205	mature	known	non-templated	pig	ssc-miR-205	ssc-mir-205	MI0002440	NA	NA	NA	ENST00000384891,gene_biotype:processed_transcript,gene_symbol:MIR205HG
CGATGATGGTCCCTGTGTTTGT	miRNA	ssc-miR-2320-3p	mature	known	non-templated	pig	ssc-miR-2320-3p	NA		NA	NA	NA	NA
CGCATGTGATGAAGCAAATCAGTATGAATAAAGTCGTGATACTGTAAACGCTTTCTGATG	miRNA	hsa-miR-3607-5p	mature	novel	non-templated	human	hsa-miR-3607-5p	NA		NA	NA	NA	NA
CTAAGTGCTTCCATGTTTTAGTAG	miRNA	bta-miR-302b	mature	novel	non-templated	cattle	bta-miR-302b	NA		NA	NA	NA	ENST00000362188,gene_biotype:antisense,gene_symbol:MIR302B
CTACAGTACTGTGATAACTGAA	miRNA	ssc-miR-101	mature	known	non-templated	pig	ssc-miR-101	NA		NA	NA	NA	NA
CTAGACTGAAGCTCCTTGAGA	miRNA	ssc-miR-151-3p	mature	known	non-templated	pig	ssc-miR-151-3p	NA	NA	NA	NA	NA	NA
CTAGACTGAAGCTCCTTGAGC	miRNA	ssc-miR-151-3p	mature	known	non-templated	pig	ssc-miR-151-3p	NA	NA	NA	NA	NA	NA
CTAGACTGAAGCTCCTTGAGGAA	miRNA	ssc-miR-151-3p	mature	known	non-templated	pig	ssc-miR-151-3p	NA		NA	NA	NA	NA
CTAGACTGAAGCTCCTTGAGGAAA	miRNA	ssc-miR-151-3p	mature	known	non-templated	pig	ssc-miR-151-3p	NA		NA	NA	NA	NA
CTAGACTGAAGCTCCTTGAGGAAT	miRNA	ssc-miR-151-3p	mature	known	non-templated	pig	ssc-miR-151-3p	NA		NA	NA	NA	NA
CTAGACTGAAGCTCCTTGAGGAT	miRNA	ssc-miR-151-3p	mature	known	non-templated	pig	ssc-miR-151-3p	NA		NA	NA	NA	NA
CTAGACTGAAGCTCCTTGAGGC	miRNA	ssc-miR-151-3p	mature	known	non-templated	pig	ssc-miR-151-3p	NA		NA	NA	NA	NA
CTAGACTGAAGCTCCTTGAGGG	miRNA	ssc-miR-151-3p	mature	known	non-templated	pig	ssc-miR-151-3p	NA		NA	NA	NA	NA
CTAGACTGAAGCTCCTTGAGGT	miRNA	ssc-miR-151-3p	mature	known	non-templated	pig	ssc-miR-151-3p	NA		NA	NA	NA	NA
CTAGACTGAAGCTCCTTGAGGTA	miRNA	ssc-miR-151-3p	mature	known	non-templated	pig	ssc-miR-151-3p	NA		NA	NA	NA	NA
CTAGACTGAAGCTCCTTGAGGTAT	miRNA	ssc-miR-151-3p	mature	known	non-templated	pig	ssc-miR-151-3p	NA		NA	NA	NA	NA
CTAGACTGAAGCTCCTTGAGT	miRNA	ssc-miR-151-3p	mature	known	non-templated	pig	ssc-miR-151-3p	NA	NA	NA	NA	NA	NA
CTAGCACCATCTGAAATCGGTC	miRNA	ssc-miR-29a	mature	known	non-templated	pig	ssc-miR-29a	NA		NA	NA	NA	ENST00000362111,gene_biotype:lincRNA,gene_symbol:MIR29A
CTAGCTTATCAGACTGATGTTGAC	miRNA	ssc-miR-21	mature	known	non-templated	pig	ssc-miR-21	NA		NA	NA	NA	ENST00000362134
CTAGCTTATCAGACTGATGTTGAT	miRNA	ssc-miR-21	mature	known	non-templated	pig	ssc-miR-21	NA		NA	NA	NA	ENST00000362134
CTATACAACCTACTGCCTTCCT	miRNA	hsa-let-7b-3p	mature	novel	non-templated	human	hsa-let-7b-3p	NA		NA	NA	NA	ENST00000360737,gene_biotype:lincRNA,gene_symbol:MIRLET7BHG
CTATACAATCTACTGTCTTTCT	miRNA	bta-let-7a-3p	mature	novel	non-templated	cattle	bta-let-7a-3p	NA		NA	NA	NA	ENST00000360737,gene_biotype:lincRNA,gene_symbol:MIRLET7BHG
CTATTGCACTTGTCCCGGCCTGT	miRNA	ssc-miR-92a	mature	known	non-templated	pig	ssc-miR-92a	NA		NA	NA	NA	ENST00000385233,gene_biotype:processed_transcript,gene_symbol:MIR17HG
CTCAAACTGTGGGGGA	miRNA	ssc-miR-371-5p	mature	known	non-templated	pig	ssc-miR-371-5p	NA	NA	NA	NA	NA	NA
CTCAAACTGTGGGGGCACA	miRNA	ssc-miR-371-5p	mature	known	non-templated	pig	ssc-miR-371-5p	NA	NA	NA	NA	NA	NA
CTCAAACTGTGGGGGCACC	miRNA	ssc-miR-371-5p	mature	known	non-templated	pig	ssc-miR-371-5p	NA	NA	NA	NA	NA	NA
CTCAAACTGTGGGGGCACCTT	miRNA	hsa-miR-371a-5p	mature	novel	non-templated	human	hsa-miR-371a-5p	NA	NA	NA	NA	NA	NA
CTCAAACTGTGGGGGCACCTTC	miRNA	hsa-miR-371a-5p	mature	novel	non-templated	human	hsa-miR-371a-5p	NA	NA	NA	NA	NA	NA
CTCAAACTGTGGGGGCACG	miRNA	ssc-miR-371-5p	mature	known	non-templated	pig	ssc-miR-371-5p	NA	NA	NA	NA	NA	NA
CTCAAACTGTGGGGGCACTA	miRNA	ssc-miR-371-5p	mature	known	non-templated	pig	ssc-miR-371-5p	NA	NA	NA	NA	NA	NA
CTCAAACTGTGGGGGCACTC	miRNA	ssc-miR-371-5p	mature	known	non-templated	pig	ssc-miR-371-5p	NA	NA	NA	NA	NA	NA
CTCAAACTGTGGGGGCACTG	miRNA	ssc-miR-371-5p	mature	known	non-templated	pig	ssc-miR-371-5p	NA	NA	NA	NA	NA	NA
CTCAAACTGTGGGGGCACTTA	miRNA	ssc-miR-371-5p	mature	known	non-templated	pig	ssc-miR-371-5p	NA	NA	NA	NA	NA	NA
CTCAAACTGTGGGGGCACTTAA	miRNA	ssc-miR-371-5p	mature	known	non-templated	pig	ssc-miR-371-5p	NA	NA	NA	NA	NA	NA
CTCAAACTGTGGGGGCACTTAAA	miRNA	ssc-miR-371-5p	mature	known	non-templated	pig	ssc-miR-371-5p	NA	NA	NA	NA	NA	NA
CTCAAACTGTGGGGGCACTTAAC	miRNA	ssc-miR-371-5p	mature	known	non-templated	pig	ssc-miR-371-5p	NA	NA	NA	NA	NA	NA
CTCAAACTGTGGGGGCACTTAAG	miRNA	ssc-miR-371-5p	mature	known	non-templated	pig	ssc-miR-371-5p	NA	NA	NA	NA	NA	NA
CTCAAACTGTGGGGGCACTTAAT	miRNA	ssc-miR-371-5p	mature	known	non-templated	pig	ssc-miR-371-5p	NA	NA	NA	NA	NA	NA
CTCAAACTGTGGGGGCACTTAC	miRNA	ssc-miR-371-5p	mature	known	non-templated	pig	ssc-miR-371-5p	NA	NA	NA	NA	NA	NA
CTCAAACTGTGGGGGCACTTAG	miRNA	ssc-miR-371-5p	mature	known	non-templated	pig	ssc-miR-371-5p	NA	NA	NA	NA	NA	NA
CTCAAACTGTGGGGGCACTTAGA	miRNA	ssc-miR-371-5p	mature	known	non-templated	pig	ssc-miR-371-5p	NA	NA	NA	NA	NA	NA
CTCAAACTGTGGGGGCACTTAT	miRNA	ssc-miR-371-5p	mature	known	non-templated	pig	ssc-miR-371-5p	NA	NA	NA	NA	NA	NA
CTCAAACTGTGGGGGCACTTCA	miRNA	ssc-miR-371-5p	mature	known	non-templated	pig	ssc-miR-371-5p	NA	NA	NA	NA	NA	NA
CTCAAACTGTGGGGGCACTTG	miRNA	ssc-miR-371-5p	mature	known	non-templated	pig	ssc-miR-371-5p	NA	NA	NA	NA	NA	NA
CTCAAACTGTGGGGGCACTTGA	miRNA	ssc-miR-371-5p	mature	known	non-templated	pig	ssc-miR-371-5p	NA	NA	NA	NA	NA	NA
CTCAAACTGTGGGGGCACTTGC	miRNA	ssc-miR-371-5p	mature	known	non-templated	pig	ssc-miR-371-5p	NA	NA	NA	NA	NA	NA
CTCAAACTGTGGGGGCACTTTA	miRNA	ssc-miR-371-5p	mature	known	non-templated	pig	ssc-miR-371-5p	NA	NA	NA	NA	NA	NA
CTCAAACTGTGGGGGCACTTTG	miRNA	ssc-miR-371-5p	mature	known	non-templated	pig	ssc-miR-371-5p	NA	NA	NA	NA	NA	NA
CTCAAACTGTGGGGGCACTTTT	miRNA	ssc-miR-371-5p	mature	known	non-templated	pig	ssc-miR-371-5p	NA	NA	NA	NA	NA	NA
CTCAAACTGTGGGGGCAT	miRNA	ssc-miR-371-5p	mature	known	non-templated	pig	ssc-miR-371-5p	NA	NA	NA	NA	NA	NA
CTCAAACTGTGGGGGT	miRNA	ssc-miR-371-5p	mature	known	non-templated	pig	ssc-miR-371-5p	NA	NA	NA	NA	NA	NA
CTCCAGCCTGGGCAACATAGCGAGACCCCGTCTCTA	miRNA	ssc-miR-1285	mature	known	non-templated	pig	ssc-miR-1285	NA		NA	NA	NA	ENST00000618786,gene_biotype:misc_RNA,gene_symbol:RN7SL1
CTCCAGCCTGGGCAACATAGCGAGACCCCGTCTCTTA	miRNA	ssc-miR-1285	mature	known	non-templated	pig	ssc-miR-1285	NA		NA	NA	NA	ENST00000626159
CTCCTGACTCCAGGTCCTGTGC	miRNA	hsa-miR-378a-5p	mature	novel	non-templated	human	hsa-miR-378a-5p	NA	NA	NA	NA	NA	NA
CTCCTGGGGCCCGCACTCTCGT	miRNA	ssc-miR-1343	mature	known	non-templated	pig	ssc-miR-1343	NA		NA	NA	NA	NA
CTCGGCGTGGCGTCGGTCGC	miRNA	ssc-miR-1307	mature	known	non-templated	pig	ssc-miR-1307	NA		NA	NA	NA	ENST00000408840
CTCGGCGTGGCGTCGGTCGTA	miRNA	ssc-miR-1307	mature	known	non-templated	pig	ssc-miR-1307	NA		NA	NA	NA	ENST00000408840
CTCGGCGTGGCGTCGGTCGTGA	miRNA	ssc-miR-1307	mature	known	non-templated	pig	ssc-miR-1307	NA		NA	NA	NA	ENST00000408840
CTCGGCGTGGCGTCGGTCGTGC	miRNA	ssc-miR-1307	mature	known	non-templated	pig	ssc-miR-1307	NA		NA	NA	NA	ENST00000408840
CTCGGCGTGGCGTCGGTCGTGT	miRNA	ssc-miR-1307	mature	known	non-templated	pig	ssc-miR-1307	NA		NA	NA	NA	ENST00000408840
CTCTTTCCCTGTTGCACTACC	miRNA	hsa-miR-130b-5p	mature	novel	non-templated	human	hsa-miR-130b-5p	NA		NA	NA	NA	ENST00000385018,gene_biotype:processed_transcript,gene_symbol:MIR130B
CTGACCTATGAATTGACAGCCAT	miRNA	ssc-miR-192	mature	known	non-templated	pig	ssc-miR-192	NA		NA	NA	NA	ENST00000384915,gene_biotype:lincRNA,gene_symbol:MIR194-2HG
CTGACCTATGAATTGACAGCT	miRNA	ssc-miR-192	mature	known	non-templated	pig	ssc-miR-192	NA		NA	NA	NA	ENST00000384915,gene_biotype:lincRNA,gene_symbol:MIR194-2HG
CTGGACTTGGAGTCAGAAGGA	miRNA	ssc-miR-378	mature	known	non-templated	pig	ssc-miR-378	NA		NA	NA	NA	ENST00000612936
CTGGACTTGGAGTCAGAAGGCA	miRNA	ssc-miR-378	mature	known	non-templated	pig	ssc-miR-378	NA	NA	NA	NA	NA	NA
CTGGACTTGGAGTCAGAAGGCAA	miRNA	ssc-miR-378b-3p	mature	known	non-templated	pig	ssc-miR-378b-3p	NA	NA	NA	NA	NA	NA
CTGGACTTGGAGTCAGAAGGCG	miRNA	ssc-miR-378	mature	known	non-templated	pig	ssc-miR-378	NA	NA	NA	NA	NA	NA
CTGGACTTGGAGTCAGAAGGG	miRNA	ssc-miR-378	mature	known	non-templated	pig	ssc-miR-378	NA		NA	NA	NA	ENST00000612936
CTGGACTTGGAGTCAGAAGGT	miRNA	ssc-miR-378	mature	known	non-templated	pig	ssc-miR-378	NA		NA	NA	NA	ENST00000612936
CTGGGCAACATAGCGAGACCCCGTCTCTA	miRNA	ssc-miR-1285	mature	known	non-templated	pig	ssc-miR-1285	NA		NA	NA	NA	ENST00000618786,gene_biotype:misc_RNA,gene_symbol:RN7SL1
CTGGGCAACATAGCGAGACCCCGTCTCTTA	miRNA	ssc-miR-1285	mature	known	non-templated	pig	ssc-miR-1285	NA		NA	NA	NA	ENST00000626159
CTGTACTCCAGCCTGGGCAACATAGCGAGACCCCGTCTCTA	miRNA	ssc-miR-1285	mature	known	non-templated	pig	ssc-miR-1285	NA		NA	NA	NA	NA
CTGTACTCCAGCCTGGGCAACATAGCGAGACCCCGTCTCTC	miRNA	ssc-miR-1285	mature	known	non-templated	pig	ssc-miR-1285	NA		NA	NA	NA	NA
CTGTACTCCAGCCTGGGCAACATAGCGAGACCCCGTCTCTTA	miRNA	ssc-miR-1285	mature	known	non-templated	pig	ssc-miR-1285	NA		NA	NA	NA	NA
CTGTCTGGTAACGATGTC	miRNA	bta-miR-200a	mature	novel	non-templated	cattle	bta-miR-200a	NA	NA	NA	NA	NA	NA
CTGTGCGTGTGACAGCGGCTGAA	miRNA	ssc-miR-210	mature	known	non-templated	pig	ssc-miR-210	NA		NA	NA	NA	NA
CTGTGCGTGTGACAGCGGCTGAAA	miRNA	ssc-miR-210	mature	known	non-templated	pig	ssc-miR-210	NA		NA	NA	NA	NA
CTGTGCGTGTGACAGCGGCTGAAAA	miRNA	ssc-miR-210	mature	known	non-templated	pig	ssc-miR-210	NA		NA	NA	NA	NA
CTGTGCGTGTGACAGCGGCTGAAC	miRNA	ssc-miR-210	mature	known	non-templated	pig	ssc-miR-210	NA		NA	NA	NA	NA
CTGTGCGTGTGACAGCGGCTGAAT	miRNA	ssc-miR-210	mature	known	non-templated	pig	ssc-miR-210	NA		NA	NA	NA	NA
CTGTGCGTGTGACAGCGGCTGT	miRNA	ssc-miR-210	mature	known	non-templated	pig	ssc-miR-210	NA	NA	NA	NA	NA	NA
CTTAAACGTGGATGTACTTGA	miRNA	hsa-miR-302a-5p	mature	novel	non-templated	human	hsa-miR-302a-5p	NA	NA	NA	NA	NA	NA
CTTAAACGTGGATGTACTTGCA	miRNA	hsa-miR-302a-5p	mature	novel	non-templated	human	hsa-miR-302a-5p	NA	NA	NA	NA	NA	NA
CTTAAACGTGGATGTACTTGCC	miRNA	hsa-miR-302a-5p	mature	novel	non-templated	human	hsa-miR-302a-5p	NA	NA	NA	NA	NA	NA
CTTAAACGTGGATGTACTTGCG	miRNA	hsa-miR-302a-5p	mature	novel	non-templated	human	hsa-miR-302a-5p	NA	NA	NA	NA	NA	NA
CTTAAACGTGGATGTACTTGT	miRNA	hsa-miR-302a-5p	mature	novel	non-templated	human	hsa-miR-302a-5p	NA	NA	NA	NA	NA	NA
CTTATCAGGTTGTATTGTAATC	miRNA	ssc-miR-374a-3p	mature	known	non-templated	pig	ssc-miR-374a-3p	NA	NA	NA	NA	NA	NA
CTTCAAGTAATCCAGGATAGGCC	miRNA	ssc-miR-26a	mature	known	non-templated	pig	ssc-miR-26a	NA	NA	NA	NA	NA	NA
CTTCAAGTAATCCAGGATAGGCT	miRNA	ssc-miR-26a	mature	known	non-templated	pig	ssc-miR-26a	NA		NA	NA	NA	NA
CTTTCAGTCGGATGTTTACAGT	miRNA	ssc-miR-30e-3p	mature	known	non-templated	pig	ssc-miR-30e-3p	NA	NA	NA	NA	NA	NA
CTTTCAGTCGGATGTTTACAGTT	miRNA	ssc-miR-30e-3p	mature	known	non-templated	pig	ssc-miR-30e-3p	NA	NA	NA	NA	NA	NA
CTTTCAGTCGGATGTTTGCAGT	miRNA	ssc-miR-30a-3p	mature	known	non-templated	pig	ssc-miR-30a-3p	NA	NA	NA	NA	NA	NA
GAAATGTTTAGGACCACC	miRNA	hsa-miR-203a-3p	mature	novel	non-templated	human	hsa-miR-203a-3p	NA	NA	NA	NA	NA	NA
GAAATGTTTAGGACCACTAA	miRNA	hsa-miR-203a-3p	mature	novel	non-templated	human	hsa-miR-203a-3p	NA	NA	NA	NA	NA	NA
GAAATGTTTAGGACCACTAC	miRNA	hsa-miR-203a-3p	mature	novel	non-templated	human	hsa-miR-203a-3p	NA	NA	NA	NA	NA	NA
GAAATGTTTAGGACCACTAGC	miRNA	hsa-miR-203a-3p	mature	novel	non-templated	human	hsa-miR-203a-3p	NA	NA	NA	NA	NA	NA
GAAATGTTTAGGACCACTAGT	miRNA	hsa-miR-203a-3p	mature	novel	non-templated	human	hsa-miR-203a-3p	NA	NA	NA	NA	NA	NA
GAAGTGCTTCCATGTTTTAGA	miRNA	bta-miR-302a	mature	novel	non-templated	cattle	bta-miR-302a	NA		NA	NA	NA	ENST00000362188,gene_biotype:antisense,gene_symbol:MIR302B
GAAGTGCTTCCATGTTTTAGC	miRNA	bta-miR-302a	mature	novel	non-templated	cattle	bta-miR-302a	NA		NA	NA	NA	ENST00000362188,gene_biotype:antisense,gene_symbol:MIR302B
GAAGTGCTTCCATGTTTTAGG	miRNA	bta-miR-302a	mature	novel	non-templated	cattle	bta-miR-302a	NA		NA	NA	NA	ENST00000362188,gene_biotype:antisense,gene_symbol:MIR302B
GAAGTGCTTCCATGTTTTAGTA	miRNA	bta-miR-302a	mature	novel	non-templated	cattle	bta-miR-302a	NA		NA	NA	NA	ENST00000362188,gene_biotype:antisense,gene_symbol:MIR302B
GAAGTGCTTCCATGTTTTAGTG	miRNA	bta-miR-302a	mature	novel	non-templated	cattle	bta-miR-302a	NA		NA	NA	NA	ENST00000362188,gene_biotype:antisense,gene_symbol:MIR302B
GAAGTGCTTCCATGTTTTAGTGA	miRNA	bta-miR-302a	mature	novel	non-templated	cattle	bta-miR-302a	NA		NA	NA	NA	NA
GAAGTGCTTCCATGTTTTAGTGC	miRNA	bta-miR-302a	mature	novel	non-templated	cattle	bta-miR-302a	NA	NA	NA	NA	NA	NA
GAAGTGCTTCCATGTTTTAGTGG	miRNA	bta-miR-302a	mature	novel	non-templated	cattle	bta-miR-302a	NA	NA	NA	NA	NA	NA
GAAGTGCTTCCATGTTTTAGTGT	miRNA	bta-miR-302a	mature	novel	non-templated	cattle	bta-miR-302a	NA	NA	NA	NA	NA	NA
GAATGGATTTTTGGAGCT	miRNA	bta-miR-1246	mature	novel	non-templated	cattle	bta-miR-1246	NA		NA	NA	NA	ENST00000410666,gene_biotype:snRNA,gene_symbol:RNU2-49P
GAGAGATCAGAGGCGCAGAGC	miRNA	bta-miR-6529a	mature	novel	non-templated	cattle	bta-miR-6529a	NA		NA	NA	NA	ENST00000613558
GAGATGAAGCACTGTAGCTCT	miRNA	ssc-miR-143-3p	mature	known	non-templated	pig	ssc-miR-143-3p	NA		NA	NA	NA	ENST00000385300,gene_biotype:lincRNA,gene_symbol:CARMN
GAGCTCGGTCTGAGGCCCCTCAGT	miRNA	ssc-miR-423-3p	mature	known	non-templated	pig	ssc-miR-423-3p	NA		NA	NA	NA	ENST00000362201
GAGGGGCAGAGAGCGAGACTTC	miRNA	ssc-miR-423-5p	mature	known	non-templated	pig	ssc-miR-423-5p	NA		NA	NA	NA	ENST00000362201
GAGGTAGTAGATTGTATAGC	miRNA	ssc-let-7f	mature	known	non-templated	pig	ssc-let-7f	NA	NA	NA	NA	NA	NA
GAGGTAGTAGATTGTATAGTC	miRNA	ssc-let-7f	mature	known	non-templated	pig	ssc-let-7f	NA	NA	NA	NA	NA	NA
GAGGTAGTAGGTTGTATAGC	miRNA	ssc-let-7a	mature	known	non-templated	pig	ssc-let-7a	NA		NA	NA	NA	ENST00000360737,gene_biotype:lincRNA,gene_symbol:MIRLET7BHG
GAGGTAGTAGGTTGTATAGTA	miRNA	ssc-let-7a	mature	known	non-templated	pig	ssc-let-7a	NA		NA	NA	NA	ENST00000360737,gene_biotype:lincRNA,gene_symbol:MIRLET7BHG
GAGGTAGTAGGTTGTATAGTC	miRNA	ssc-let-7a	mature	known	non-templated	pig	ssc-let-7a	NA		NA	NA	NA	ENST00000360737,gene_biotype:lincRNA,gene_symbol:MIRLET7BHG
GAGGTAGTAGGTTGTATAGTG	miRNA	ssc-let-7a	mature	known	non-templated	pig	ssc-let-7a	NA		NA	NA	NA	ENST00000360737,gene_biotype:lincRNA,gene_symbol:MIRLET7BHG
GAGGTAGTAGGTTGTATAGTTA	miRNA	ssc-let-7a	mature	known	non-templated	pig	ssc-let-7a	NA		NA	NA	NA	ENST00000360737,gene_biotype:lincRNA,gene_symbol:MIRLET7BHG
GAGGTAGTAGGTTGTGTGGTC	miRNA	bta-let-7b	mature	novel	non-templated	cattle	bta-let-7b	NA		NA	NA	NA	ENST00000360737,gene_biotype:lincRNA,gene_symbol:MIRLET7BHG
GAGGTAGTAGGTTGTGTGGTTA	miRNA	bta-let-7b	mature	novel	non-templated	cattle	bta-let-7b	NA		NA	NA	NA	ENST00000360737,gene_biotype:lincRNA,gene_symbol:MIRLET7BHG
GAGGTAGTAGGTTGTGTGGTTC	miRNA	bta-let-7b	mature	novel	non-templated	cattle	bta-let-7b	NA		NA	NA	NA	ENST00000360737,gene_biotype:lincRNA,gene_symbol:MIRLET7BHG
GAGGTAGTAGTTTGTACAGC	miRNA	ssc-let-7g	mature	known	non-templated	pig	ssc-let-7g	NA	NA	NA	NA	NA	NA
GAGGTAGTAGTTTGTACAGTC	miRNA	ssc-let-7g	mature	known	non-templated	pig	ssc-let-7g	NA	NA	NA	NA	NA	NA
GAGGTAGTAGTTTGTACAGTTA	miRNA	ssc-let-7g	mature	known	non-templated	pig	ssc-let-7g	NA	NA	NA	NA	NA	NA
GAGGTAGTAGTTTGTGCTGC	miRNA	bta-let-7i	mature	novel	non-templated	cattle	bta-let-7i	NA	NA	NA	NA	NA	NA
GAGGTAGTAGTTTGTGCTGTA	miRNA	bta-let-7i	mature	novel	non-templated	cattle	bta-let-7i	NA	NA	NA	NA	NA	NA
GAGGTAGTAGTTTGTGCTGTC	miRNA	bta-let-7i	mature	novel	non-templated	cattle	bta-let-7i	NA	NA	NA	NA	NA	NA
GAGGTAGTAGTTTGTGCTGTG	miRNA	bta-let-7i	mature	novel	non-templated	cattle	bta-let-7i	NA	NA	NA	NA	NA	NA
GAGGTAGTAGTTTGTGCTGTTA	miRNA	bta-let-7i	mature	novel	non-templated	cattle	bta-let-7i	NA	NA	NA	NA	NA	NA
GAGGTAGTAGTTTGTGCTGTTC	miRNA	bta-let-7i	mature	novel	non-templated	cattle	bta-let-7i	NA	NA	NA	NA	NA	NA
GAGGTAGTAGTTTGTGCTGTTT	miRNA	bta-let-7i	mature	novel	non-templated	cattle	bta-let-7i	NA	NA	NA	NA	NA	NA
GAGTGGTTTTACCCTATGGTAG	miRNA	ssc-miR-140-5p	mature	known	non-templated	pig	ssc-miR-140-5p	NA		NA	NA	NA	NA
GATAGCCACTGTACTCCAGCCTGGGCAACATAGCGAGACCCCGTCTCTT	miRNA	ssc-miR-1285	mature	known	non-templated	pig	ssc-miR-1285	NA		NA	NA	NA	ENST00000626159
GATGACACGATCACTCCCGTTGAGT	miRNA	bta-miR-425-5p	mature	novel	non-templated	cattle	bta-miR-425-5p	NA		NA	NA	NA	NA
GCAAAGCACACGGCCTGCAGAGAGA	miRNA	bta-miR-330	mature	novel	non-templated	cattle	bta-miR-330	NA		NA	NA	NA	ENST00000362196
GCAAAGCACACGGCCTGCAGAGAGC	miRNA	bta-miR-330	mature	novel	non-templated	cattle	bta-miR-330	NA		NA	NA	NA	ENST00000362196
GCAAAGCACACGGCCTGCAGAGAGT	miRNA	bta-miR-330	mature	novel	non-templated	cattle	bta-miR-330	NA		NA	NA	NA	ENST00000362196
GCACTTGTCCCGGCCTGC	miRNA	ssc-miR-92a	mature	known	non-templated	pig	ssc-miR-92a	NA		NA	NA	NA	ENST00000385233,gene_biotype:processed_transcript,gene_symbol:MIR17HG
GCAGTCCATGGGCATATACACC	miRNA	ssc-miR-455-3p	mature	known	non-templated	pig	ssc-miR-455-3p	NA		NA	NA	NA	NA
GCATGTGATGAAGCAAATCAGTATGAATAAAGTCGTGATACTGTAAACACTTTCTGATGTA	miRNA	hsa-miR-3607-5p	mature	novel	non-templated	human	hsa-miR-3607-5p	NA		NA	NA	NA	NA
GCATGTGATGAAGCAAATCAGTATGAATAAAGTCGTGATACTGTAAACGCTTTCTGATG	miRNA	hsa-miR-3607-5p	mature	novel	non-templated	human	hsa-miR-3607-5p	NA		NA	NA	NA	NA
GCATGTGATGAAGCAAATCAGTATGAATAAAGTCGTGATACTGTAAACGCTTTCTGATGT	miRNA	hsa-miR-3607-5p	mature	novel	non-templated	human	hsa-miR-3607-5p	NA		NA	NA	NA	NA
GCATGTGATGAAGCAAATCAGTATGAATAAAGTCGTGATACTGTAAACGCTTTCTGATGTA	miRNA	hsa-miR-3607-5p	mature	novel	non-templated	human	hsa-miR-3607-5p	NA		NA	NA	NA	NA
GCCACTGTACTCCAGCCTGGGCAACATAGCGAGACCCCGTCTCTA	miRNA	ssc-miR-1285	mature	known	non-templated	pig	ssc-miR-1285	NA		NA	NA	NA	ENST00000618786,gene_biotype:misc_RNA,gene_symbol:RN7SL1
GCTCGGTCTGAGGCCCCTCAGA	miRNA	ssc-miR-423-3p	mature	known	non-templated	pig	ssc-miR-423-3p	NA		NA	NA	NA	ENST00000362201
GCTCGGTCTGAGGCCCCTCAGC	miRNA	ssc-miR-423-3p	mature	known	non-templated	pig	ssc-miR-423-3p	NA		NA	NA	NA	ENST00000362201
GCTCGGTCTGAGGCCCCTCAGG	miRNA	ssc-miR-423-3p	mature	known	non-templated	pig	ssc-miR-423-3p	NA		NA	NA	NA	ENST00000362201
GCTCGGTCTGAGGCCCCTCAGTA	miRNA	ssc-miR-423-3p	mature	known	non-templated	pig	ssc-miR-423-3p	NA		NA	NA	NA	ENST00000362201
GCTCGGTCTGAGGCCCCTCAGTT	miRNA	ssc-miR-423-3p	mature	known	non-templated	pig	ssc-miR-423-3p	NA		NA	NA	NA	ENST00000362201
GCTCGGTCTGAGGCCCCTT	miRNA	ssc-miR-423-3p	mature	known	non-templated	pig	ssc-miR-423-3p	NA		NA	NA	NA	ENST00000362201
GCTGGACTTGGAGTCAGAAGG	miRNA	bta-miR-378d	mature	novel	non-templated	cattle	bta-miR-378d	NA		NA	NA	NA	ENST00000612936
GCTGTACTCCAGCCTGGGCAACATAGCGAGACCCCGTCTCTA	miRNA	ssc-miR-1285	mature	known	non-templated	pig	ssc-miR-1285	NA		NA	NA	NA	NA
GCTGTACTCCAGCCTGGGCAACATAGCGAGACCCCGTCTCTT	miRNA	ssc-miR-1285	mature	known	non-templated	pig	ssc-miR-1285	NA		NA	NA	NA	NA
GCTGTACTCCAGCCTGGGCAACATAGCGAGACCCCGTCTCTTA	miRNA	ssc-miR-1285	mature	known	non-templated	pig	ssc-miR-1285	NA		NA	NA	NA	NA
GGAAGACTAGTGATTTTGTTGC	miRNA	ssc-miR-7	mature	known	non-templated	pig	ssc-miR-7	NA		NA	NA	NA	ENST00000384871
GGAAGACTAGTGATTTTGTTGTA	miRNA	ssc-miR-7	mature	known	non-templated	pig	ssc-miR-7	NA		NA	NA	NA	ENST00000384871
GGAAGACTAGTGATTTTGTTGTAAA	miRNA	ssc-miR-7	mature	known	non-templated	pig	ssc-miR-7	NA	NA	NA	NA	NA	NA
GGAAGACTAGTGATTTTGTTGTC	miRNA	ssc-miR-7	mature	known	non-templated	pig	ssc-miR-7	NA		NA	NA	NA	ENST00000384871
GGAAGACTAGTGATTTTGTTGTG	miRNA	ssc-miR-7	mature	known	non-templated	pig	ssc-miR-7	NA		NA	NA	NA	ENST00000384871
GGAAGACTAGTGATTTTGTTGTTA	miRNA	ssc-miR-7	mature	known	non-templated	pig	ssc-miR-7	NA		NA	NA	NA	ENST00000384871
GGAATGTAAAGAAGTATGTAC	miRNA	ssc-miR-1	mature	known	non-templated	pig	ssc-miR-1	NA		NA	NA	NA	ENST00000384961,gene_biotype:antisense,gene_symbol:MIR133A1HG
GGAGTGTGACAATGGTGTTTA	miRNA	ssc-miR-122	mature	known	non-templated	pig	ssc-miR-122	NA		NA	NA	NA	ENST00000385044,gene_biotype:lincRNA,gene_symbol:MIR122
GGAGTGTGACAATGGTGTTTGA	miRNA	ssc-miR-122	mature	known	non-templated	pig	ssc-miR-122	NA		NA	NA	NA	ENST00000385044,gene_biotype:lincRNA,gene_symbol:MIR122
GGCAGTGTAGTTAGCTGATC	miRNA	ssc-miR-34c	mature	known	non-templated	pig	ssc-miR-34c	NA	NA	NA	NA	NA	NA
GGCAGTGTAGTTAGCTGATTGA	miRNA	ssc-miR-34c	mature	known	non-templated	pig	ssc-miR-34c	NA	NA	NA	NA	NA	NA
GGCAGTGTAGTTAGCTGATTGCA	miRNA	ssc-miR-34c	mature	known	non-templated	pig	ssc-miR-34c	NA	NA	NA	NA	NA	NA
GGCAGTGTAGTTAGCTGATTGT	miRNA	ssc-miR-34c	mature	known	non-templated	pig	ssc-miR-34c	NA	NA	NA	NA	NA	NA
GGCTCAGTTCAGCAGGAACAGT	miRNA	ssc-miR-24-3p	mature	known	non-templated	pig	ssc-miR-24-3p	NA		NA	NA	NA	ENST00000386972,gene_biotype:lincRNA,gene_symbol:MIR24-2
GGGTTGGGCGGAGGCTTTCCC	miRNA	ssc-miR-296-3p	mature	known	non-templated	pig	ssc-miR-296-3p	NA	NA	NA	NA	NA	NA
GGGTTGGGCGGAGGCTTTCT	miRNA	ssc-miR-296-3p	mature	known	non-templated	pig	ssc-miR-296-3p	NA	NA	NA	NA	NA	NA
GGTTGGGATCGGTTGCAATGCC	miRNA	hsa-miR-92a-1-5p	mature	novel	non-templated	human	hsa-miR-92a-1-5p	NA		NA	NA	NA	ENST00000385233,gene_biotype:processed_transcript,gene_symbol:MIR17HG
GTAAACATCCCCGACTGGAAA	miRNA	ssc-miR-30d	mature	known	non-templated	pig	ssc-miR-30d	NA	NA	NA	NA	NA	NA
GTAAACATCCCCGACTGGAAGA	miRNA	ssc-miR-30d	mature	known	non-templated	pig	ssc-miR-30d	NA	NA	NA	NA	NA	NA
GTAAACATCCCCGACTGGAAGCA	miRNA	ssc-miR-30d	mature	known	non-templated	pig	ssc-miR-30d	NA	NA	NA	NA	NA	NA
GTAAACATCCCCGACTGGAAGCC	miRNA	ssc-miR-30d	mature	known	non-templated	pig	ssc-miR-30d	NA	NA	NA	NA	NA	NA
GTAAACATCCCCGACTGGAAGCG	miRNA	ssc-miR-30d	mature	known	non-templated	pig	ssc-miR-30d	NA	NA	NA	NA	NA	NA
GTAAACATCCCCGACTGGAAGCTT	miRNA	ssc-miR-30d	mature	known	non-templated	pig	ssc-miR-30d	NA	NA	NA	NA	NA	NA
GTAAACATCCCCGACTGGAAGT	miRNA	ssc-miR-30d	mature	known	non-templated	pig	ssc-miR-30d	NA	NA	NA	NA	NA	NA
GTAAACATCCTACACTCTCAGCA	miRNA	ssc-miR-30c-5p	mature	known	non-templated	pig	ssc-miR-30c-5p	NA	NA	NA	NA	NA	NA
GTAAACATCCTACACTCTCAGCC	miRNA	ssc-miR-30c-5p	mature	known	non-templated	pig	ssc-miR-30c-5p	NA	NA	NA	NA	NA	NA
GTAAACATCCTACACTCTCAGT	miRNA	ssc-miR-30c-5p	mature	known	non-templated	pig	ssc-miR-30c-5p	NA	NA	NA	NA	NA	NA
GTAAACATCCTCGACTGGAAA	miRNA	ssc-miR-30a-5p	mature	known	non-templated	pig	ssc-miR-30a-5p	NA	NA	NA	NA	NA	NA
GTAAACATCCTCGACTGGAAGCA	miRNA	bta-miR-30a-5p	mature	novel	non-templated	cattle	bta-miR-30a-5p	NA	NA	NA	NA	NA	NA
GTAAACATCCTCGACTGGAAGCC	miRNA	bta-miR-30a-5p	mature	novel	non-templated	cattle	bta-miR-30a-5p	NA	NA	NA	NA	NA	NA
GTAAACATCCTCGACTGGAAGCG	miRNA	bta-miR-30a-5p	mature	novel	non-templated	cattle	bta-miR-30a-5p	NA	NA	NA	NA	NA	NA
GTAAACATCCTCGACTGGAAGT	miRNA	ssc-miR-30a-5p	mature	known	non-templated	pig	ssc-miR-30a-5p	NA	NA	NA	NA	NA	NA
GTAAACATCCTTGACTGGAAGCA	miRNA	ssc-miR-30e-5p	mature	known	non-templated	pig	ssc-miR-30e-5p	NA	NA	NA	NA	NA	NA
GTAAACATCCTTGACTGGAAGCC	miRNA	ssc-miR-30e-5p	mature	known	non-templated	pig	ssc-miR-30e-5p	NA	NA	NA	NA	NA	NA
GTAAACATCCTTGACTGGAAGCG	miRNA	ssc-miR-30e-5p	mature	known	non-templated	pig	ssc-miR-30e-5p	NA	NA	NA	NA	NA	NA
GTAAACATCCTTGACTGGAAGCTT	miRNA	ssc-miR-30e-5p	mature	known	non-templated	pig	ssc-miR-30e-5p	NA	NA	NA	NA	NA	NA
GTACAGTACTGTGATAACTGAAA	miRNA	ssc-miR-101	mature	known	non-templated	pig	ssc-miR-101	NA		NA	NA	NA	NA
GTACAGTACTGTGATAACTGAC	miRNA	ssc-miR-101	mature	known	non-templated	pig	ssc-miR-101	NA	NA	NA	NA	NA	NA
GTACAGTACTGTGATAACTGAT	miRNA	ssc-miR-101	mature	known	non-templated	pig	ssc-miR-101	NA	NA	NA	NA	NA	NA
GTACTCCAGCCTGGGCAACATAGCGAGACCCCGTCTCTA	miRNA	ssc-miR-1285	mature	known	non-templated	pig	ssc-miR-1285	NA		NA	NA	NA	ENST00000618786,gene_biotype:misc_RNA,gene_symbol:RN7SL1
GTACTCCAGCCTGGGCAACATAGCGAGACCCCGTCTCTTA	miRNA	ssc-miR-1285	mature	known	non-templated	pig	ssc-miR-1285	NA		NA	NA	NA	ENST00000626159
GTATGAATAAAGTCGTGATACTGTAAACGCTTTCTGATG	miRNA	hsa-miR-3607-3p	mature	novel	non-templated	human	hsa-miR-3607-3p	NA		NA	NA	NA	NA
GTGAAATGTTTAGGACCACA	miRNA	hsa-miR-203a-3p	mature	novel	non-templated	human	hsa-miR-203a-3p	NA	NA	NA	NA	NA	NA
GTGAAATGTTTAGGACCACC	miRNA	hsa-miR-203a-3p	mature	novel	non-templated	human	hsa-miR-203a-3p	NA	NA	NA	NA	NA	NA
GTGAAATGTTTAGGACCACG	miRNA	hsa-miR-203a-3p	mature	novel	non-templated	human	hsa-miR-203a-3p	NA	NA	NA	NA	NA	NA
GTGAAATGTTTAGGACCACTAA	miRNA	hsa-miR-203a-3p	mature	novel	non-templated	human	hsa-miR-203a-3p	NA	NA	NA	NA	NA	NA
GTGAAATGTTTAGGACCACTAC	miRNA	hsa-miR-203a-3p	mature	novel	non-templated	human	hsa-miR-203a-3p	NA	NA	NA	NA	NA	NA
GTGAAATGTTTAGGACCACTAGC	miRNA	hsa-miR-203a-3p	mature	novel	non-templated	human	hsa-miR-203a-3p	NA		NA	NA	NA	NA
GTGAAATGTTTAGGACCACTAGG	miRNA	hsa-miR-203a-3p	mature	novel	non-templated	human	hsa-miR-203a-3p	NA		NA	NA	NA	NA
GTGAAATGTTTAGGACCACTAGT	miRNA	hsa-miR-203a-3p	mature	novel	non-templated	human	hsa-miR-203a-3p	NA		NA	NA	NA	NA
GTGAAATGTTTAGGACCACTAT	miRNA	hsa-miR-203a-3p	mature	novel	non-templated	human	hsa-miR-203a-3p	NA	NA	NA	NA	NA	NA
GTGATACTGTAAACGCTTTCTGATG	miRNA	hsa-miR-3607-3p	mature	novel	non-templated	human	hsa-miR-3607-3p	NA		NA	NA	NA	NA
GTGATACTGTAAACGCTTTCTGATGTA	miRNA	hsa-miR-3607-3p	mature	novel	non-templated	human	hsa-miR-3607-3p	NA		NA	NA	NA	NA
GTGCAAATCCATGCAAAACTGT	miRNA	ssc-miR-19a	mature	known	non-templated	pig	ssc-miR-19a	NA		NA	NA	NA	ENST00000384829,gene_biotype:processed_transcript,gene_symbol:MIR17HG
GTGTACTCCAGCCTGGGCAACATAGCGAGACCCCGTCTCTT	miRNA	ssc-miR-1285	mature	known	non-templated	pig	ssc-miR-1285	NA		NA	NA	NA	ENST00000626159
TAAACATCCTTGACTGGAAGCC	miRNA	ssc-miR-30e-5p	mature	known	non-templated	pig	ssc-miR-30e-5p	NA	NA	NA	NA	NA	NA
TAAACGTGGATGTACTTGCA	miRNA	hsa-miR-302a-5p	mature	novel	non-templated	human	hsa-miR-302a-5p	NA	NA	NA	NA	NA	NA
TAAACGTGGATGTACTTGCC	miRNA	hsa-miR-302a-5p	mature	novel	non-templated	human	hsa-miR-302a-5p	NA	NA	NA	NA	NA	NA
TAAACGTGGATGTACTTGCCTT	miRNA	hsa-miR-302a-5p	mature	novel	non-templated	human	hsa-miR-302a-5p	NA	NA	NA	NA	NA	NA
TAAACGTGGATGTACTTGCTA	miRNA	hsa-miR-302a-5p	mature	novel	non-templated	human	hsa-miR-302a-5p	NA	NA	NA	NA	NA	NA
TAAACGTGGATGTACTTGCTC	miRNA	hsa-miR-302a-5p	mature	novel	non-templated	human	hsa-miR-302a-5p	NA	NA	NA	NA	NA	NA
TAAACGTGGATGTACTTGCTG	miRNA	hsa-miR-302a-5p	mature	novel	non-templated	human	hsa-miR-302a-5p	NA	NA	NA	NA	NA	NA
TAAAGTGCTTATAGTGCAGGC	miRNA	ssc-miR-20a	mature	known	non-templated	pig	ssc-miR-20a	NA		NA	NA	NA	ENST00000362279,gene_biotype:processed_transcript,gene_symbol:MIR17HG
TAAAGTGCTTATAGTGCAGGTAA	miRNA	ssc-miR-20a	mature	known	non-templated	pig	ssc-miR-20a	NA		NA	NA	NA	ENST00000362279,gene_biotype:processed_transcript,gene_symbol:MIR17HG
TAAAGTGCTTATAGTGCAGGTAC	miRNA	ssc-miR-20a	mature	known	non-templated	pig	ssc-miR-20a	NA		NA	NA	NA	ENST00000362279,gene_biotype:processed_transcript,gene_symbol:MIR17HG
TAAAGTGCTTATAGTGCAGGTAGA	miRNA	ssc-miR-20a	mature	known	non-templated	pig	ssc-miR-20a	NA		NA	NA	NA	ENST00000362279,gene_biotype:processed_transcript,gene_symbol:MIR17HG
TAAAGTGCTTATAGTGCAGGTAGG	miRNA	ssc-miR-20a	mature	known	non-templated	pig	ssc-miR-20a	NA		NA	NA	NA	ENST00000362279,gene_biotype:processed_transcript,gene_symbol:MIR17HG
TAAAGTGCTTATAGTGCAGGTAT	miRNA	ssc-miR-20a	mature	known	non-templated	pig	ssc-miR-20a	NA		NA	NA	NA	ENST00000362279,gene_biotype:processed_transcript,gene_symbol:MIR17HG
TAACACTGTCTGGTAACGAC	miRNA	bta-miR-200a	mature	novel	non-templated	cattle	bta-miR-200a	NA	NA	NA	NA	NA	NA
TAACACTGTCTGGTAACGATA	miRNA	bta-miR-200a	mature	novel	non-templated	cattle	bta-miR-200a	NA	NA	NA	NA	NA	NA
TAACACTGTCTGGTAACGATGA	miRNA	bta-miR-200a	mature	novel	non-templated	cattle	bta-miR-200a	NA	NA	NA	NA	NA	NA
TAACACTGTCTGGTAACGATGC	miRNA	bta-miR-200a	mature	novel	non-templated	cattle	bta-miR-200a	NA	NA	NA	NA	NA	NA
TAACACTGTCTGGTAACGATGCT	miRNA	hsa-miR-200a-3p	mature	novel	non-templated	human	hsa-miR-200a-3p	NA	NA	NA	NA	NA	NA
TAACACTGTCTGGTAACGATGG	miRNA	bta-miR-200a	mature	novel	non-templated	cattle	bta-miR-200a	NA	NA	NA	NA	NA	NA
TAACACTGTCTGGTAACGATGGT	miRNA	hsa-miR-200a-3p	mature	novel	non-templated	human	hsa-miR-200a-3p	NA	NA	NA	NA	NA	NA
TAACACTGTCTGGTAACGATGTA	miRNA	hsa-miR-200a-3p	mature	novel	non-templated	cattle	hsa-miR-200a-3p	NA		NA	NA	NA	NA
TAACACTGTCTGGTAACGATGTC	miRNA	hsa-miR-200a-3p	mature	novel	non-templated	cattle	hsa-miR-200a-3p	NA		NA	NA	NA	NA
TAACACTGTCTGGTAACGATGTG	miRNA	hsa-miR-200a-3p	mature	novel	non-templated	cattle	hsa-miR-200a-3p	NA		NA	NA	NA	NA
TAACACTGTCTGGTAACGATGTTA	miRNA	bta-miR-200a	mature	novel	non-templated	cattle	bta-miR-200a	NA		NA	NA	NA	NA
TAACACTGTCTGGTAACGATGTTT	miRNA	bta-miR-200a	mature	novel	non-templated	cattle	bta-miR-200a	NA		NA	NA	NA	NA
TAACACTGTCTGGTAAT	miRNA	bta-miR-200a	mature	novel	non-templated	cattle	bta-miR-200a	NA	NA	NA	NA	NA	NA
TAAGGTGCATCTAGTGCAGATAA	miRNA	ssc-miR-18a	mature	known	non-templated	pig	ssc-miR-18a	NA		NA	NA	NA	ENST00000362310,gene_biotype:processed_transcript,gene_symbol:MIR17HG
TAAGGTGCATCTAGTGCAGATAGA	miRNA	ssc-miR-18a	mature	known	non-templated	pig	ssc-miR-18a	NA		NA	NA	NA	ENST00000362310,gene_biotype:processed_transcript,gene_symbol:MIR17HG
TAAGTGCTTCCATGCTTTAGT	miRNA	hsa-miR-302e	mature	novel	non-templated	human	hsa-miR-302e	NA		NA	NA	NA	ENST00000362188,gene_biotype:antisense,gene_symbol:MIR302B
TAAGTGCTTCCATGCTTTAGTAG	miRNA	hsa-miR-302e	mature	novel	non-templated	human	hsa-miR-302e	NA		NA	NA	NA	ENST00000362188,gene_biotype:antisense,gene_symbol:MIR302B
TAAGTGCTTCCATGCTTTAGTAGA	miRNA	hsa-miR-302e	mature	novel	non-templated	human	hsa-miR-302e	NA		NA	NA	NA	ENST00000362188,gene_biotype:antisense,gene_symbol:MIR302B
TAAGTGCTTCCATGCTTTAGTGA	miRNA	hsa-miR-302e	mature	novel	non-templated	human	hsa-miR-302e	NA		NA	NA	NA	NA
TAAGTGCTTCCATGTTTCAGC	miRNA	bta-miR-302c	mature	novel	non-templated	cattle	bta-miR-302c	NA	NA	NA	NA	NA	NA
TAAGTGCTTCCATGTTTCAGTGA	miRNA	bta-miR-302c	mature	novel	non-templated	cattle	bta-miR-302c	NA	NA	NA	NA	NA	NA
TAAGTGCTTCCATGTTTCAGTGC	miRNA	bta-miR-302c	mature	novel	non-templated	cattle	bta-miR-302c	NA	NA	NA	NA	NA	NA
TAAGTGCTTCCATGTTTCAGTGGC	miRNA	bta-miR-302c	mature	novel	non-templated	cattle	bta-miR-302c	NA		NA	NA	NA	NA
TAAGTGCTTCCATGTTTCAGTGGT	miRNA	bta-miR-302c	mature	novel	non-templated	cattle	bta-miR-302c	NA		NA	NA	NA	NA
TAAGTGCTTCCATGTTTCAGTGT	miRNA	bta-miR-302c	mature	novel	non-templated	cattle	bta-miR-302c	NA	NA	NA	NA	NA	NA
TAAGTGCTTCCATGTTTTAGA	miRNA	bta-miR-302d	mature	novel	non-templated	cattle	bta-miR-302d	NA		NA	NA	NA	ENST00000362188,gene_biotype:antisense,gene_symbol:MIR302B
TAAGTGCTTCCATGTTTTAGC	miRNA	bta-miR-302d	mature	novel	non-templated	cattle	bta-miR-302d	NA		NA	NA	NA	ENST00000362188,gene_biotype:antisense,gene_symbol:MIR302B
TAAGTGCTTCCATGTTTTAGCAG	miRNA	bta-miR-302d	mature	novel	non-templated	cattle	bta-miR-302d	NA	NA	NA	NA	NA	NA
TAAGTGCTTCCATGTTTTAGCAGA	miRNA	bta-miR-302d	mature	novel	non-templated	cattle	bta-miR-302d	NA	NA	NA	NA	NA	NA
TAAGTGCTTCCATGTTTTAGCGA	miRNA	bta-miR-302d	mature	novel	non-templated	cattle	bta-miR-302d	NA	NA	NA	NA	NA	NA
TAAGTGCTTCCATGTTTTAGG	miRNA	bta-miR-302d	mature	novel	non-templated	cattle	bta-miR-302d	NA		NA	NA	NA	ENST00000362188,gene_biotype:antisense,gene_symbol:MIR302B
TAAGTGCTTCCATGTTTTAGTAA	miRNA	bta-miR-302d	mature	novel	non-templated	cattle	bta-miR-302d	NA		NA	NA	NA	ENST00000362188,gene_biotype:antisense,gene_symbol:MIR302B
TAAGTGCTTCCATGTTTTAGTAAA	miRNA	bta-miR-302d	mature	novel	non-templated	cattle	bta-miR-302d	NA		NA	NA	NA	ENST00000362188,gene_biotype:antisense,gene_symbol:MIR302B
TAAGTGCTTCCATGTTTTAGTAC	miRNA	bta-miR-302d	mature	novel	non-templated	cattle	bta-miR-302d	NA		NA	NA	NA	ENST00000362188,gene_biotype:antisense,gene_symbol:MIR302B
TAAGTGCTTCCATGTTTTAGTAGAAA	miRNA	bta-miR-302b	mature	novel	non-templated	cattle	bta-miR-302b	NA		NA	NA	NA	NA
TAAGTGCTTCCATGTTTTAGTAGC	miRNA	bta-miR-302b	mature	novel	non-templated	cattle	bta-miR-302b	NA		NA	NA	NA	ENST00000362188,gene_biotype:antisense,gene_symbol:MIR302B
TAAGTGCTTCCATGTTTTAGTAGT	miRNA	bta-miR-302b	mature	novel	non-templated	cattle	bta-miR-302b	NA		NA	NA	NA	ENST00000362188,gene_biotype:antisense,gene_symbol:MIR302B
TAAGTGCTTCCATGTTTTAGTAT	miRNA	bta-miR-302d	mature	novel	non-templated	cattle	bta-miR-302d	NA		NA	NA	NA	ENST00000362188,gene_biotype:antisense,gene_symbol:MIR302B
TAAGTGCTTCCATGTTTTAGTC	miRNA	bta-miR-302d	mature	novel	non-templated	cattle	bta-miR-302d	NA		NA	NA	NA	ENST00000362188,gene_biotype:antisense,gene_symbol:MIR302B
TAAGTGCTTCCATGTTTTAGTGAA	miRNA	bta-miR-302a	mature	novel	non-templated	cattle	bta-miR-302a	NA		NA	NA	NA	NA
TAAGTGCTTCCATGTTTTAGTGAAA	miRNA	bta-miR-302a	mature	novel	non-templated	cattle	bta-miR-302a	NA		NA	NA	NA	NA
TAAGTGCTTCCATGTTTTAGTGAC	miRNA	bta-miR-302a	mature	novel	non-templated	cattle	bta-miR-302a	NA		NA	NA	NA	NA
TAAGTGCTTCCATGTTTTAGTGG	miRNA	bta-miR-302d	mature	novel	non-templated	cattle	bta-miR-302d	NA		NA	NA	NA	ENST00000362188,gene_biotype:antisense,gene_symbol:MIR302B
TAAGTGCTTCCATGTTTTAGTGGA	miRNA	bta-miR-302d	mature	novel	non-templated	cattle	bta-miR-302d	NA		NA	NA	NA	NA
TAAGTGCTTCCATGTTTTAGTGT	miRNA	bta-miR-302d	mature	novel	non-templated	cattle	bta-miR-302d	NA		NA	NA	NA	ENST00000362188,gene_biotype:antisense,gene_symbol:MIR302B
TAAGTGCTTCCATGTTTTAGTGTA	miRNA	bta-miR-302d	mature	novel	non-templated	cattle	bta-miR-302d	NA		NA	NA	NA	NA
TAAGTGCTTCCATGTTTTAGTGTT	miRNA	bta-miR-302d	mature	novel	non-templated	cattle	bta-miR-302d	NA		NA	NA	NA	NA
TAAGTGCTTCCATGTTTTAGTT	miRNA	bta-miR-302d	mature	novel	non-templated	cattle	bta-miR-302d	NA		NA	NA	NA	ENST00000362188,gene_biotype:antisense,gene_symbol:MIR302B
TAAGTGCTTCCATGTTTTAGTTC	miRNA	bta-miR-302d	mature	novel	non-templated	cattle	bta-miR-302d	NA		NA	NA	NA	ENST00000362188,gene_biotype:antisense,gene_symbol:MIR302B
TAAGTGCTTCCATGTTTTAGTTG	miRNA	bta-miR-302d	mature	novel	non-templated	cattle	bta-miR-302d	NA		NA	NA	NA	ENST00000362188,gene_biotype:antisense,gene_symbol:MIR302B
TAATACTGCCGGGTAATGAC	miRNA	bta-miR-200c	mature	novel	non-templated	cattle	bta-miR-200c	NA	NA	NA	NA	NA	NA
TAATACTGCCGGGTAATGATA	miRNA	bta-miR-200c	mature	novel	non-templated	cattle	bta-miR-200c	NA	NA	NA	NA	NA	NA
TAATACTGCCGGGTAATGATGA	miRNA	bta-miR-200c	mature	novel	non-templated	cattle	bta-miR-200c	NA	NA	NA	NA	NA	NA
TAATACTGCCGGGTAATGATGGAA	miRNA	bta-miR-200c	mature	novel	non-templated	cattle	bta-miR-200c	NA		NA	NA	NA	NA
TAATACTGCCGGGTAATGATGGAAT	miRNA	bta-miR-200c	mature	novel	non-templated	cattle	bta-miR-200c	NA		NA	NA	NA	NA
TAATACTGCCGGGTAATGATGGAC	miRNA	bta-miR-200c	mature	novel	non-templated	cattle	bta-miR-200c	NA		NA	NA	NA	NA
TAATACTGCCGGGTAATGATGGAT	miRNA	bta-miR-200c	mature	novel	non-templated	cattle	bta-miR-200c	NA		NA	NA	NA	NA
TAATACTGCCGGGTAATGATGGATT	miRNA	bta-miR-200c	mature	novel	non-templated	cattle	bta-miR-200c	NA		NA	NA	NA	NA
TAATACTGCCGGGTAATGATGGC	miRNA	bta-miR-200c	mature	novel	non-templated	cattle	bta-miR-200c	NA	NA	NA	NA	NA	NA
TAATACTGCCGGGTAATGATGGG	miRNA	bta-miR-200c	mature	novel	non-templated	cattle	bta-miR-200c	NA	NA	NA	NA	NA	NA
TAATACTGCCGGGTAATGATGGT	miRNA	bta-miR-200c	mature	novel	non-templated	cattle	bta-miR-200c	NA	NA	NA	NA	NA	NA
TAATACTGCCGGGTAATGATGT	miRNA	bta-miR-200c	mature	novel	non-templated	cattle	bta-miR-200c	NA	NA	NA	NA	NA	NA
TAATACTGCCTGGTAATGATA	miRNA	bta-miR-200b	mature	novel	non-templated	cattle	bta-miR-200b	NA	NA	NA	NA	NA	NA
TAATACTGCCTGGTAATGATGAA	miRNA	bta-miR-200b	mature	novel	non-templated	cattle	bta-miR-200b	NA		NA	NA	NA	NA
TAATACTGCCTGGTAATGATGAAA	miRNA	bta-miR-200b	mature	novel	non-templated	cattle	bta-miR-200b	NA		NA	NA	NA	NA
TAATACTGCCTGGTAATGATGACA	miRNA	bta-miR-200b	mature	novel	non-templated	cattle	bta-miR-200b	NA		NA	NA	NA	NA
TAATACTGCCTGGTAATGATGACC	miRNA	bta-miR-200b	mature	novel	non-templated	cattle	bta-miR-200b	NA		NA	NA	NA	NA
TAATACTGCCTGGTAATGATGACT	miRNA	bta-miR-200b	mature	novel	non-templated	cattle	bta-miR-200b	NA		NA	NA	NA	NA
TAATACTGCCTGGTAATGATGAG	miRNA	bta-miR-200b	mature	novel	non-templated	cattle	bta-miR-200b	NA		NA	NA	NA	NA
TAATACTGCCTGGTAATGATGAT	miRNA	bta-miR-200b	mature	novel	non-templated	cattle	bta-miR-200b	NA		NA	NA	NA	NA
TAATACTGCCTGGTAATGATGATA	miRNA	bta-miR-200b	mature	novel	non-templated	cattle	bta-miR-200b	NA		NA	NA	NA	NA
TAATACTGCCTGGTAATGATGATT	miRNA	bta-miR-200b	mature	novel	non-templated	cattle	bta-miR-200b	NA		NA	NA	NA	NA
TAATACTGCCTGGTAATGATGC	miRNA	bta-miR-200b	mature	novel	non-templated	cattle	bta-miR-200b	NA		NA	NA	NA	NA
TAATACTGCCTGGTAATGATGG	miRNA	bta-miR-200b	mature	novel	non-templated	cattle	bta-miR-200b	NA		NA	NA	NA	NA
TAATACTGCCTGGTAATGATGGC	miRNA	bta-miR-200b	mature	novel	non-templated	cattle	bta-miR-200b	NA		NA	NA	NA	NA
TAATACTGCCTGGTAATGATGGCA	miRNA	bta-miR-200b	mature	novel	non-templated	cattle	bta-miR-200b	NA		NA	NA	NA	NA
TAATACTGCCTGGTAATGATGGCT	miRNA	bta-miR-200b	mature	novel	non-templated	cattle	bta-miR-200b	NA		NA	NA	NA	NA
TAATACTGCCTGGTAATGATGGT	miRNA	bta-miR-200b	mature	novel	non-templated	cattle	bta-miR-200b	NA		NA	NA	NA	NA
TAATACTGCCTGGTAATGATGT	miRNA	bta-miR-200b	mature	novel	non-templated	cattle	bta-miR-200b	NA		NA	NA	NA	NA
TAATACTGCCTGGTAATGATGTC	miRNA	bta-miR-200b	mature	novel	non-templated	cattle	bta-miR-200b	NA		NA	NA	NA	NA
TAATACTGCCTGGTAATGATT	miRNA	bta-miR-200b	mature	novel	non-templated	cattle	bta-miR-200b	NA	NA	NA	NA	NA	NA
TAATACTGTCTGGTAATGCCA	miRNA	ssc-miR-429	mature	known	non-templated	pig	ssc-miR-429	NA	NA	NA	NA	NA	NA
TAATACTGTCTGGTAATGCCGA	miRNA	ssc-miR-429	mature	known	non-templated	pig	ssc-miR-429	NA	NA	NA	NA	NA	NA
TAATACTGTCTGGTAATGCCGC	miRNA	ssc-miR-429	mature	known	non-templated	pig	ssc-miR-429	NA	NA	NA	NA	NA	NA
TAATACTGTCTGGTAATGCCGG	miRNA	ssc-miR-429	mature	known	non-templated	pig	ssc-miR-429	NA	NA	NA	NA	NA	NA
TAATACTGTCTGGTAATGCCGTA	miRNA	ssc-miR-429	mature	known	non-templated	pig	ssc-miR-429	NA		NA	NA	NA	NA
TAATACTGTCTGGTAATGCCGTT	miRNA	ssc-miR-429	mature	known	non-templated	pig	ssc-miR-429	NA		NA	NA	NA	NA
TAATACTGTCTGGTAATGCCT	miRNA	ssc-miR-429	mature	known	non-templated	pig	ssc-miR-429	NA	NA	NA	NA	NA	NA
TAATACTGTCTGGTAATGCT	miRNA	ssc-miR-429	mature	known	non-templated	pig	ssc-miR-429	NA	NA	NA	NA	NA	NA
TAATGCCCCTAAAAATCCTTAC	miRNA	ssc-miR-365-3p	mature	known	non-templated	pig	ssc-miR-365-3p	NA		NA	NA	NA	ENST00000362317,gene_biotype:lincRNA,gene_symbol:MIR365B
TAATGGATTTTTGGAGCT	miRNA	bta-miR-1246	mature	novel	non-templated	cattle	bta-miR-1246	NA		NA	NA	NA	ENST00000410666,gene_biotype:snRNA,gene_symbol:RNU2-49P
TAATTTTATGTATAAGCTAGC	miRNA	hsa-miR-590-3p	mature	novel	non-templated	human	hsa-miR-590-3p	NA	NA	NA	NA	NA	NA
TACAGTACTGTGATAACTGAAA	miRNA	ssc-miR-101	mature	known	non-templated	pig	ssc-miR-101	NA		NA	NA	NA	NA
TACAGTACTGTGATAACTGAAGT	miRNA	ssc-miR-101	mature	known	non-templated	pig	ssc-miR-101	NA		NA	NA	NA	NA
TACAGTACTGTGATAACTGAAT	miRNA	ssc-miR-101	mature	known	non-templated	pig	ssc-miR-101	NA		NA	NA	NA	NA
TACCACAGGGTAGAACCACGGACT	miRNA	ssc-miR-140-3p	mature	known	non-templated	pig	ssc-miR-140-3p	NA		NA	NA	NA	NA
TACCCTGTAGAACCGAATC	miRNA	ssc-miR-10b	mature	known	non-templated	pig	ssc-miR-10b	NA	NA	NA	NA	NA	NA
TACCCTGTAGAACCGAATTTA	miRNA	ssc-miR-10b	mature	known	non-templated	pig	ssc-miR-10b	NA	NA	NA	NA	NA	NA
TACCCTGTAGAACCGAATTTGA	miRNA	ssc-miR-10b	mature	known	non-templated	pig	ssc-miR-10b	NA	NA	NA	NA	NA	NA
TACCCTGTAGAACCGAATTTGC	miRNA	ssc-miR-10b	mature	known	non-templated	pig	ssc-miR-10b	NA	NA	NA	NA	NA	NA
TACCCTGTAGAACCGAATTTGG	miRNA	ssc-miR-10b	mature	known	non-templated	pig	ssc-miR-10b	NA	NA	NA	NA	NA	NA
TACCCTGTAGAACCGAATTTGTA	miRNA	ssc-miR-10b	mature	known	non-templated	pig	ssc-miR-10b	NA		NA	NA	NA	ENST00000385043,gene_biotype:sense_intronic,gene_symbol:MIR10A
TACCCTGTAGAACCGAATTTGTGA	miRNA	ssc-miR-10b	mature	known	non-templated	pig	ssc-miR-10b	NA		NA	NA	NA	ENST00000385043,gene_biotype:sense_intronic,gene_symbol:MIR10A
TACCCTGTAGAACCGAATTTGTT	miRNA	ssc-miR-10b	mature	known	non-templated	pig	ssc-miR-10b	NA		NA	NA	NA	ENST00000385043,gene_biotype:sense_intronic,gene_symbol:MIR10A
TACCCTGTAGATCCGAATC	miRNA	ssc-miR-10a-5p	mature	known	non-templated	pig	ssc-miR-10a-5p	NA		NA	NA	NA	ENST00000385043,gene_biotype:sense_intronic,gene_symbol:MIR10A
TACCCTGTAGATCCGAATTC	miRNA	ssc-miR-10a-5p	mature	known	non-templated	pig	ssc-miR-10a-5p	NA		NA	NA	NA	ENST00000385043,gene_biotype:sense_intronic,gene_symbol:MIR10A
TACCCTGTAGATCCGAATTTA	miRNA	ssc-miR-10a-5p	mature	known	non-templated	pig	ssc-miR-10a-5p	NA		NA	NA	NA	ENST00000385043,gene_biotype:sense_intronic,gene_symbol:MIR10A
TACCCTGTAGATCCGAATTTGA	miRNA	ssc-miR-10a-5p	mature	known	non-templated	pig	ssc-miR-10a-5p	NA		NA	NA	NA	ENST00000385043,gene_biotype:sense_intronic,gene_symbol:MIR10A
TACCCTGTAGATCCGAATTTGC	miRNA	ssc-miR-10a-5p	mature	known	non-templated	pig	ssc-miR-10a-5p	NA		NA	NA	NA	ENST00000385043,gene_biotype:sense_intronic,gene_symbol:MIR10A
TACCCTGTAGATCCGAATTTGG	miRNA	ssc-miR-10a-5p	mature	known	non-templated	pig	ssc-miR-10a-5p	NA		NA	NA	NA	ENST00000385043,gene_biotype:sense_intronic,gene_symbol:MIR10A
TACCCTGTAGATCCGAATTTGTA	miRNA	ssc-miR-10a-5p	mature	known	non-templated	pig	ssc-miR-10a-5p	NA		NA	NA	NA	ENST00000385043,gene_biotype:sense_intronic,gene_symbol:MIR10A
TACCCTGTAGATCCGAATTTGTGA	miRNA	ssc-miR-10a-5p	mature	known	non-templated	pig	ssc-miR-10a-5p	NA		NA	NA	NA	ENST00000385043,gene_biotype:sense_intronic,gene_symbol:MIR10A
TACCCTGTAGATCCGAATTTGTGC	miRNA	ssc-miR-10a-5p	mature	known	non-templated	pig	ssc-miR-10a-5p	NA		NA	NA	NA	ENST00000385043,gene_biotype:sense_intronic,gene_symbol:MIR10A
TACCCTGTAGATCCGAATTTGTT	miRNA	ssc-miR-10a-5p	mature	known	non-templated	pig	ssc-miR-10a-5p	NA		NA	NA	NA	ENST00000385043,gene_biotype:sense_intronic,gene_symbol:MIR10A
TAGACTGAAGCTCCTTGAGA	miRNA	ssc-miR-151-3p	mature	known	non-templated	pig	ssc-miR-151-3p	NA	NA	NA	NA	NA	NA
TAGACTGAAGCTCCTTGAGGAA	miRNA	ssc-miR-151-3p	mature	known	non-templated	pig	ssc-miR-151-3p	NA	NA	NA	NA	NA	NA
TAGACTGAAGCTCCTTGAGGT	miRNA	ssc-miR-151-3p	mature	known	non-templated	pig	ssc-miR-151-3p	NA	NA	NA	NA	NA	NA
TAGCAGCGGGAACAGTACC	miRNA	ssc-miR-503	mature	known	non-templated	pig	ssc-miR-503	NA	NA	NA	NA	NA	NA
TAGCAGCGGGAACAGTACTA	miRNA	ssc-miR-503	mature	known	non-templated	pig	ssc-miR-503	NA	NA	NA	NA	NA	NA
TAGCAGCGGGAACAGTACTGA	miRNA	ssc-miR-503	mature	known	non-templated	pig	ssc-miR-503	NA		NA	NA	NA	NA
TAGCAGCGGGAACAGTACTGAAA	miRNA	bta-miR-503-5p	mature	novel	non-templated	cattle	bta-miR-503-5p	NA		NA	NA	NA	NA
TAGCAGCGGGAACAGTACTGCAGA	miRNA	ssc-miR-503	mature	known	non-templated	pig	ssc-miR-503	NA		NA	NA	NA	NA
TAGCAGCGGGAACAGTACTGT	miRNA	ssc-miR-503	mature	known	non-templated	pig	ssc-miR-503	NA		NA	NA	NA	NA
TAGCTCGGTCTGAGGCCCCTCAGT	miRNA	ssc-miR-423-3p	mature	known	non-templated	pig	ssc-miR-423-3p	NA		NA	NA	NA	ENST00000362201
TAGCTTATCAGACTGATA	miRNA	ssc-miR-21	mature	known	non-templated	pig	ssc-miR-21	NA		NA	NA	NA	ENST00000362134
TAGCTTATCAGACTGATGC	miRNA	ssc-miR-21	mature	known	non-templated	pig	ssc-miR-21	NA		NA	NA	NA	ENST00000362134
TAGCTTATCAGACTGATGTC	miRNA	ssc-miR-21	mature	known	non-templated	pig	ssc-miR-21	NA		NA	NA	NA	ENST00000362134
TAGCTTATCAGACTGATGTTA	miRNA	ssc-miR-21	mature	known	non-templated	pig	ssc-miR-21	NA		NA	NA	NA	ENST00000362134
TAGCTTATCAGACTGATGTTC	miRNA	ssc-miR-21	mature	known	non-templated	pig	ssc-miR-21	NA		NA	NA	NA	ENST00000362134
TAGCTTATCAGACTGATGTTGAA	miRNA	ssc-miR-21	mature	known	non-templated	pig	ssc-miR-21	NA		NA	NA	NA	ENST00000362134
TAGCTTATCAGACTGATGTTGAAA	miRNA	ssc-miR-21	mature	known	non-templated	pig	ssc-miR-21	NA		NA	NA	NA	ENST00000362134
TAGCTTATCAGACTGATGTTGACA	miRNA	ssc-miR-21	mature	known	non-templated	pig	ssc-miR-21	NA		NA	NA	NA	ENST00000362134
TAGCTTATCAGACTGATGTTGACC	miRNA	ssc-miR-21	mature	known	non-templated	pig	ssc-miR-21	NA		NA	NA	NA	ENST00000362134
TAGCTTATCAGACTGATGTTGACG	miRNA	ssc-miR-21	mature	known	non-templated	pig	ssc-miR-21	NA		NA	NA	NA	ENST00000362134
TAGCTTATCAGACTGATGTTGAG	miRNA	ssc-miR-21	mature	known	non-templated	pig	ssc-miR-21	NA		NA	NA	NA	ENST00000362134
TAGCTTATCAGACTGATGTTGAT	miRNA	ssc-miR-21	mature	known	non-templated	pig	ssc-miR-21	NA		NA	NA	NA	ENST00000362134
TAGCTTATCAGACTGATGTTGC	miRNA	ssc-miR-21	mature	known	non-templated	pig	ssc-miR-21	NA		NA	NA	NA	ENST00000362134
TAGCTTATCAGACTGATGTTGCC	miRNA	ssc-miR-21	mature	known	non-templated	pig	ssc-miR-21	NA		NA	NA	NA	ENST00000362134
TAGCTTATCAGACTGATGTTGG	miRNA	ssc-miR-21	mature	known	non-templated	pig	ssc-miR-21	NA		NA	NA	NA	ENST00000362134
TAGCTTATCAGACTGATGTTGGA	miRNA	ssc-miR-21	mature	known	non-templated	pig	ssc-miR-21	NA		NA	NA	NA	ENST00000362134
TAGCTTATCAGACTGATGTTGGC	miRNA	ssc-miR-21	mature	known	non-templated	pig	ssc-miR-21	NA		NA	NA	NA	ENST00000362134
TAGCTTATCAGACTGATGTTGGCA	miRNA	ssc-miR-21	mature	known	non-templated	pig	ssc-miR-21	NA	NA	NA	NA	NA	NA
TAGCTTATCAGACTGATGTTGGCC	miRNA	ssc-miR-21	mature	known	non-templated	pig	ssc-miR-21	NA	NA	NA	NA	NA	NA
TAGCTTATCAGACTGATGTTGGCT	miRNA	ssc-miR-21	mature	known	non-templated	pig	ssc-miR-21	NA	NA	NA	NA	NA	NA
TAGCTTATCAGACTGATGTTGGT	miRNA	ssc-miR-21	mature	known	non-templated	pig	ssc-miR-21	NA		NA	NA	NA	ENST00000362134
TAGCTTATCAGACTGATGTTGT	miRNA	ssc-miR-21	mature	known	non-templated	pig	ssc-miR-21	NA		NA	NA	NA	ENST00000362134
TAGCTTATCAGACTGATGTTGTC	miRNA	ssc-miR-21	mature	known	non-templated	pig	ssc-miR-21	NA		NA	NA	NA	ENST00000362134
TAGCTTATCAGACTGATGTTGTT	miRNA	ssc-miR-21	mature	known	non-templated	pig	ssc-miR-21	NA		NA	NA	NA	ENST00000362134
TAGCTTATCAGACTGATGTTGTTC	miRNA	ssc-miR-21	mature	known	non-templated	pig	ssc-miR-21	NA	NA	NA	NA	NA	NA
TAGCTTATCAGACTGATGTTT	miRNA	ssc-miR-21	mature	known	non-templated	pig	ssc-miR-21	NA		NA	NA	NA	ENST00000362134
TAGTGGTTTTACCCTATGGTAG	miRNA	ssc-miR-140-5p	mature	known	non-templated	pig	ssc-miR-140-5p	NA		NA	NA	NA	NA
TATAGCCACTGTACTCCAGCCTGGGCAACATAGCGAGACCCCGTCTCTT	miRNA	ssc-miR-1285	mature	known	non-templated	pig	ssc-miR-1285	NA		NA	NA	NA	ENST00000626159
TATCAGACTGATGTTGACA	miRNA	bta-miR-21-5p	mature	novel	non-templated	cattle	bta-miR-21-5p	NA		NA	NA	NA	ENST00000362134
TATCAGACTGATGTTGACC	miRNA	bta-miR-21-5p	mature	novel	non-templated	cattle	bta-miR-21-5p	NA		NA	NA	NA	ENST00000362134
TATCAGACTGATGTTGAT	miRNA	ssc-miR-21	mature	known	non-templated	pig	ssc-miR-21	NA		NA	NA	NA	ENST00000362134
TATGACACGATCACTCCCGTTGAGT	miRNA	bta-miR-425-5p	mature	novel	non-templated	cattle	bta-miR-425-5p	NA		NA	NA	NA	NA
TATGGCACTGGTAGAATTCACA	miRNA	ssc-miR-183	mature	known	non-templated	pig	ssc-miR-183	NA	NA	NA	NA	NA	NA
TATGGCACTGGTAGAATTCACC	miRNA	ssc-miR-183	mature	known	non-templated	pig	ssc-miR-183	NA	NA	NA	NA	NA	NA
TATGGCACTGGTAGAATTCACG	miRNA	ssc-miR-183	mature	known	non-templated	pig	ssc-miR-183	NA	NA	NA	NA	NA	NA
TATGGCACTGGTAGAATTCACTA	miRNA	ssc-miR-183	mature	known	non-templated	pig	ssc-miR-183	NA		NA	NA	NA	NA
TATGGCACTGGTAGAATTCACTT	miRNA	ssc-miR-183	mature	known	non-templated	pig	ssc-miR-183	NA		NA	NA	NA	NA
TATGTGCCTTTGGACTACATCGC	miRNA	ssc-miR-455-5p	mature	known	non-templated	pig	ssc-miR-455-5p	NA		NA	NA	NA	NA
TATTGCACTCGTCCCGGCCTCA	miRNA	ssc-miR-92b-3p	mature	known	non-templated	pig	ssc-miR-92b-3p	NA		NA	NA	NA	ENST00000607575,gene_biotype:antisense,gene_symbol:MIR92B
TATTGCACTCGTCCCGGCCTCAA	miRNA	ssc-miR-92b-3p	mature	known	non-templated	pig	ssc-miR-92b-3p	NA		NA	NA	NA	ENST00000607575,gene_biotype:antisense,gene_symbol:MIR92B
TATTGCACTCGTCCCGGCCTCAAT	miRNA	ssc-miR-92b-3p	mature	known	non-templated	pig	ssc-miR-92b-3p	NA	NA	NA	NA	NA	NA
TATTGCACTCGTCCCGGCCTCAT	miRNA	ssc-miR-92b-3p	mature	known	non-templated	pig	ssc-miR-92b-3p	NA		NA	NA	NA	ENST00000607575,gene_biotype:antisense,gene_symbol:MIR92B
TATTGCACTCGTCCCGGCCTCCA	miRNA	ssc-miR-92b-3p	mature	known	non-templated	pig	ssc-miR-92b-3p	NA		NA	NA	NA	ENST00000607575,gene_biotype:antisense,gene_symbol:MIR92B
TATTGCACTCGTCCCGGCCTCCAAT	miRNA	ssc-miR-92b-3p	mature	known	non-templated	pig	ssc-miR-92b-3p	NA		NA	NA	NA	NA
TATTGCACTCGTCCCGGCCTCCAT	miRNA	ssc-miR-92b-3p	mature	known	non-templated	pig	ssc-miR-92b-3p	NA		NA	NA	NA	ENST00000607575,gene_biotype:antisense,gene_symbol:MIR92B
TATTGCACTCGTCCCGGCCTCCATT	miRNA	ssc-miR-92b-3p	mature	known	non-templated	pig	ssc-miR-92b-3p	NA		NA	NA	NA	NA
TATTGCACTCGTCCCGGCCTCCT	miRNA	ssc-miR-92b-3p	mature	known	non-templated	pig	ssc-miR-92b-3p	NA		NA	NA	NA	ENST00000607575,gene_biotype:antisense,gene_symbol:MIR92B
TATTGCACTCGTCCCGGCCTCCTT	miRNA	ssc-miR-92b-3p	mature	known	non-templated	pig	ssc-miR-92b-3p	NA		NA	NA	NA	ENST00000607575,gene_biotype:antisense,gene_symbol:MIR92B
TATTGCACTCGTCCCGGCCTCG	miRNA	ssc-miR-92b-3p	mature	known	non-templated	pig	ssc-miR-92b-3p	NA		NA	NA	NA	ENST00000607575,gene_biotype:antisense,gene_symbol:MIR92B
TATTGCACTCGTCCCGGCCTCT	miRNA	ssc-miR-92b-3p	mature	known	non-templated	pig	ssc-miR-92b-3p	NA		NA	NA	NA	ENST00000607575,gene_biotype:antisense,gene_symbol:MIR92B
TATTGCACTCGTCCCGGCCTT	miRNA	ssc-miR-92b-3p	mature	known	non-templated	pig	ssc-miR-92b-3p	NA		NA	NA	NA	ENST00000607575,gene_biotype:antisense,gene_symbol:MIR92B
TATTGCACTTGTCCCGGCCTA	miRNA	ssc-miR-92a	mature	known	non-templated	pig	ssc-miR-92a	NA		NA	NA	NA	ENST00000385233,gene_biotype:processed_transcript,gene_symbol:MIR17HG
TATTGCACTTGTCCCGGCCTGA	miRNA	ssc-miR-92a	mature	known	non-templated	pig	ssc-miR-92a	NA		NA	NA	NA	ENST00000385233,gene_biotype:processed_transcript,gene_symbol:MIR17HG
TATTGCACTTGTCCCGGCCTGC	miRNA	ssc-miR-92a	mature	known	non-templated	pig	ssc-miR-92a	NA		NA	NA	NA	ENST00000385233,gene_biotype:processed_transcript,gene_symbol:MIR17HG
TATTGCACTTGTCCCGGCCTGG	miRNA	ssc-miR-92a	mature	known	non-templated	pig	ssc-miR-92a	NA		NA	NA	NA	ENST00000385233,gene_biotype:processed_transcript,gene_symbol:MIR17HG
TATTGCACTTGTCCCGGCCTGTA	miRNA	ssc-miR-92a	mature	known	non-templated	pig	ssc-miR-92a	NA		NA	NA	NA	ENST00000385233,gene_biotype:processed_transcript,gene_symbol:MIR17HG
TATTGCACTTGTCCCGGCCTGTAA	miRNA	ssc-miR-92a	mature	known	non-templated	pig	ssc-miR-92a	NA		NA	NA	NA	ENST00000385233,gene_biotype:processed_transcript,gene_symbol:MIR17HG
TATTGCACTTGTCCCGGCCTGTAAA	miRNA	ssc-miR-92a	mature	known	non-templated	pig	ssc-miR-92a	NA		NA	NA	NA	NA
TATTGCACTTGTCCCGGCCTGTAAAT	miRNA	ssc-miR-92a	mature	known	non-templated	pig	ssc-miR-92a	NA		NA	NA	NA	NA
TATTGCACTTGTCCCGGCCTGTAAC	miRNA	ssc-miR-92a	mature	known	non-templated	pig	ssc-miR-92a	NA		NA	NA	NA	NA
TATTGCACTTGTCCCGGCCTGTAAG	miRNA	ssc-miR-92a	mature	known	non-templated	pig	ssc-miR-92a	NA		NA	NA	NA	NA
TATTGCACTTGTCCCGGCCTGTAAT	miRNA	ssc-miR-92a	mature	known	non-templated	pig	ssc-miR-92a	NA		NA	NA	NA	NA
TATTGCACTTGTCCCGGCCTGTAC	miRNA	ssc-miR-92a	mature	known	non-templated	pig	ssc-miR-92a	NA		NA	NA	NA	ENST00000385233,gene_biotype:processed_transcript,gene_symbol:MIR17HG
TATTGCACTTGTCCCGGCCTGTACA	miRNA	ssc-miR-92a	mature	known	non-templated	pig	ssc-miR-92a	NA		NA	NA	NA	NA
TATTGCACTTGTCCCGGCCTGTAG	miRNA	ssc-miR-92a	mature	known	non-templated	pig	ssc-miR-92a	NA		NA	NA	NA	ENST00000385233,gene_biotype:processed_transcript,gene_symbol:MIR17HG
TATTGCACTTGTCCCGGCCTGTAGA	miRNA	ssc-miR-92a	mature	known	non-templated	pig	ssc-miR-92a	NA		NA	NA	NA	NA
TATTGCACTTGTCCCGGCCTGTAT	miRNA	ssc-miR-92a	mature	known	non-templated	pig	ssc-miR-92a	NA		NA	NA	NA	ENST00000385233,gene_biotype:processed_transcript,gene_symbol:MIR17HG
TATTGCACTTGTCCCGGCCTGTC	miRNA	ssc-miR-92a	mature	known	non-templated	pig	ssc-miR-92a	NA		NA	NA	NA	ENST00000385233,gene_biotype:processed_transcript,gene_symbol:MIR17HG
TATTGCACTTGTCCCGGCCTGTGA	miRNA	ssc-miR-92a	mature	known	non-templated	pig	ssc-miR-92a	NA		NA	NA	NA	ENST00000385299,gene_biotype:processed_transcript,gene_symbol:MIR92A2
TATTGCACTTGTCCCGGCCTGTTT	miRNA	ssc-miR-92a	mature	known	non-templated	pig	ssc-miR-92a	NA		NA	NA	NA	ENST00000385233,gene_biotype:processed_transcript,gene_symbol:MIR17HG
TATTGCACTTGTCCCGGCCTT	miRNA	ssc-miR-92a	mature	known	non-templated	pig	ssc-miR-92a	NA		NA	NA	NA	ENST00000385233,gene_biotype:processed_transcript,gene_symbol:MIR17HG
TATTGCACTTGTCCCGGCT	miRNA	ssc-miR-92a	mature	known	non-templated	pig	ssc-miR-92a	NA		NA	NA	NA	ENST00000385233,gene_biotype:processed_transcript,gene_symbol:MIR17HG
TCAAGTAATCCAGGATAGGCA	miRNA	ssc-miR-26a	mature	known	non-templated	pig	ssc-miR-26a	NA	NA	NA	NA	NA	NA
TCAAGTAATCCAGGATAGGCC	miRNA	ssc-miR-26a	mature	known	non-templated	pig	ssc-miR-26a	NA	NA	NA	NA	NA	NA
TCAAGTAATCCAGGATAGGCG	miRNA	ssc-miR-26a	mature	known	non-templated	pig	ssc-miR-26a	NA	NA	NA	NA	NA	NA
TCAAGTAATCCAGGATAGGCTT	miRNA	ssc-miR-26a	mature	known	non-templated	pig	ssc-miR-26a	NA	NA	NA	NA	NA	NA
TCAAGTAATTCAGGATAGGTC	miRNA	bta-miR-26b	mature	novel	non-templated	cattle	bta-miR-26b	NA	NA	NA	NA	NA	NA
TCACAGTGAACCGGTCTCTTTA	miRNA	ssc-miR-128	mature	known	non-templated	pig	ssc-miR-128	NA		NA	NA	NA	NA
TCACAGTGAACCGGTCTCTTTAA	miRNA	ssc-miR-128	mature	known	non-templated	pig	ssc-miR-128	NA		NA	NA	NA	NA
TCACAGTGAACCGGTCTCTTTAAA	miRNA	ssc-miR-128	mature	known	non-templated	pig	ssc-miR-128	NA		NA	NA	NA	NA
TCACAGTGAACCGGTCTCTTTAC	miRNA	ssc-miR-128	mature	known	non-templated	pig	ssc-miR-128	NA		NA	NA	NA	NA
TCACAGTGAACCGGTCTCTTTAG	miRNA	ssc-miR-128	mature	known	non-templated	pig	ssc-miR-128	NA		NA	NA	NA	NA
TCACAGTGAACCGGTCTCTTTAT	miRNA	ssc-miR-128	mature	known	non-templated	pig	ssc-miR-128	NA		NA	NA	NA	NA
TCACAGTGAACCGGTCTCTTTCA	miRNA	ssc-miR-128	mature	known	non-templated	pig	ssc-miR-128	NA		NA	NA	NA	NA
TCACAGTGAACCGGTCTCTTTCAA	miRNA	ssc-miR-128	mature	known	non-templated	pig	ssc-miR-128	NA		NA	NA	NA	NA
TCACAGTGAACCGGTCTCTTTCG	miRNA	ssc-miR-128	mature	known	non-templated	pig	ssc-miR-128	NA		NA	NA	NA	NA
TCACAGTGAACCGGTCTCTTTCT	miRNA	ssc-miR-128	mature	known	non-templated	pig	ssc-miR-128	NA		NA	NA	NA	NA
TCACAGTGAACCGGTCTCTTTCTT	miRNA	ssc-miR-128	mature	known	non-templated	pig	ssc-miR-128	NA		NA	NA	NA	NA
TCACAGTGAACCGGTCTCTTTG	miRNA	ssc-miR-128	mature	known	non-templated	pig	ssc-miR-128	NA		NA	NA	NA	NA
TCACAGTGAACCGGTCTCTTTTA	miRNA	ssc-miR-128	mature	known	non-templated	pig	ssc-miR-128	NA		NA	NA	NA	NA
TCACAGTGAACCGGTCTCTTTTAA	miRNA	ssc-miR-128	mature	known	non-templated	pig	ssc-miR-128	NA		NA	NA	NA	NA
TCACAGTGAACCGGTCTCTTTTC	miRNA	ssc-miR-128	mature	known	non-templated	pig	ssc-miR-128	NA		NA	NA	NA	NA
TCACAGTGAACCGGTCTCTTTTTT	miRNA	ssc-miR-128	mature	known	non-templated	pig	ssc-miR-128	NA		NA	NA	NA	NA
TCACAGTGGCTAAGTTCCGA	miRNA	ssc-miR-27a	mature	known	non-templated	pig	ssc-miR-27a	NA	NA	NA	NA	NA	NA
TCACAGTGGCTAAGTTCTGA	miRNA	ssc-miR-27b-3p	mature	known	non-templated	pig	ssc-miR-27b-3p	NA	NA	NA	NA	NA	NA
TCACAGTGGCTAAGTTCTGT	miRNA	ssc-miR-27b-3p	mature	known	non-templated	pig	ssc-miR-27b-3p	NA	NA	NA	NA	NA	NA
TCACATTGCCAGGGATTACCACT	miRNA	bta-miR-23b-3p	mature	novel	non-templated	cattle	bta-miR-23b-3p	NA	NA	NA	NA	NA	NA
TCAGACTGATGTTGAT	miRNA	ssc-miR-21	mature	known	non-templated	pig	ssc-miR-21	NA	NA	NA	NA	NA	NA
TCAGGCTCAGTCCCCTCCCGAA	miRNA	bta-miR-484	mature	novel	non-templated	cattle	bta-miR-484	NA		NA	NA	NA	ENST00000613527
TCAGGCTCAGTCCCCTCCCGAAA	miRNA	bta-miR-484	mature	novel	non-templated	cattle	bta-miR-484	NA		NA	NA	NA	ENST00000613527
TCAGGCTCAGTCCCCTCCCGAC	miRNA	bta-miR-484	mature	novel	non-templated	cattle	bta-miR-484	NA		NA	NA	NA	ENST00000613527
TCAGGCTCAGTCCCCTCCCGATT	miRNA	bta-miR-484	mature	novel	non-templated	cattle	bta-miR-484	NA		NA	NA	NA	ENST00000613527
TCAGTGCACTACAGAACTTTGA	miRNA	ssc-miR-148a-3p	mature	known	non-templated	pig	ssc-miR-148a-3p	NA	NA	NA	NA	NA	NA
TCAGTGCACTACAGAACTTTGC	miRNA	ssc-miR-148a-3p	mature	known	non-templated	pig	ssc-miR-148a-3p	NA	NA	NA	NA	NA	NA
TCAGTGCACTACAGAACTTTGG	miRNA	ssc-miR-148a-3p	mature	known	non-templated	pig	ssc-miR-148a-3p	NA	NA	NA	NA	NA	NA
TCAGTGCACTACAGAACTTTGTA	miRNA	ssc-miR-148a-3p	mature	known	non-templated	pig	ssc-miR-148a-3p	NA		NA	NA	NA	NA
TCAGTGCACTACAGAACTTTGTT	miRNA	ssc-miR-148a-3p	mature	known	non-templated	pig	ssc-miR-148a-3p	NA		NA	NA	NA	NA
TCAGTGCATCACAGAACTTTGC	miRNA	ssc-miR-148b-3p	mature	known	non-templated	pig	ssc-miR-148b-3p	NA	NA	NA	NA	NA	NA
TCAGTGCATCACAGAACTTTGTA	miRNA	ssc-miR-148b-3p	mature	known	non-templated	pig	ssc-miR-148b-3p	NA		NA	NA	NA	NA
TCAGTGCATCACAGAACTTTGTG	miRNA	ssc-miR-148b-3p	mature	known	non-templated	pig	ssc-miR-148b-3p	NA		NA	NA	NA	NA
TCAGTGCATCACAGAACTTTGTT	miRNA	ssc-miR-148b-3p	mature	known	non-templated	pig	ssc-miR-148b-3p	NA		NA	NA	NA	NA
TCAGTGCATGACAGAACTTGGA	miRNA	ssc-miR-152	mature	known	non-templated	pig	ssc-miR-152	NA		NA	NA	NA	NA
TCAGTGCATGACAGAACTTGGC	miRNA	ssc-miR-152	mature	known	non-templated	pig	ssc-miR-152	NA		NA	NA	NA	NA
TCAGTGCATGACAGAACTTGGT	miRNA	ssc-miR-152	mature	known	non-templated	pig	ssc-miR-152	NA		NA	NA	NA	NA
TCCCAGCGGTGCCTCCA	miRNA	hsa-miR-5100	mature	novel	non-templated	human	hsa-miR-5100	NA	NA	NA	NA	NA	NA
TCCCCCAGGTGTGATTCTGATTTGT	miRNA	ssc-miR-361-3p	mature	known	non-templated	pig	ssc-miR-361-3p	NA		NA	NA	NA	NA
TCCCCGACTGGAAGCC	miRNA	ssc-miR-30d	mature	known	non-templated	pig	ssc-miR-30d	NA	NA	NA	NA	NA	NA
TCCCTGAGACCCTAACTTGTGAA	miRNA	ssc-miR-125b	mature	known	non-templated	pig	ssc-miR-125b	NA		NA	NA	NA	NA
TCCCTGAGACCCTAACTTGTGAAA	miRNA	ssc-miR-125b	mature	known	non-templated	pig	ssc-miR-125b	NA		NA	NA	NA	NA
TCCCTGAGACCCTAACTTGTGT	miRNA	ssc-miR-125b	mature	known	non-templated	pig	ssc-miR-125b	NA	NA	NA	NA	NA	NA
TCCCTGAGACCCTTTAACCTGC	miRNA	ssc-miR-125a	mature	known	non-templated	pig	ssc-miR-125a	NA	NA	NA	NA	NA	NA
TCCCTGAGACCCTTTAACCTGTA	miRNA	ssc-miR-125a	mature	known	non-templated	pig	ssc-miR-125a	NA	NA	NA	NA	NA	NA
TCCCTGAGACCCTTTAACCTGTGT	miRNA	ssc-miR-125a	mature	known	non-templated	pig	ssc-miR-125a	NA		NA	NA	NA	NA
TCCCTGTCCTCCAGGAGCTCACA	miRNA	ssc-miR-339-5p	mature	known	non-templated	pig	ssc-miR-339-5p	NA		NA	NA	NA	NA
TCCCTGTCCTCCAGGAGCTCACC	miRNA	ssc-miR-339-5p	mature	known	non-templated	pig	ssc-miR-339-5p	NA		NA	NA	NA	NA
TCCCTGTCCTCCAGGAGCTCT	miRNA	ssc-miR-4334-3p	mature	known	non-templated	pig	ssc-miR-4334-3p	NA		NA	NA	NA	NA
TCCGGGACGGCTGGGA	miRNA	hsa-miR-4497	mature	novel	non-templated	human	hsa-miR-4497	NA	NA	NA	NA	NA	NA
TCCTCGACTGGAAGCC	miRNA	bta-miR-30a-5p	mature	novel	non-templated	cattle	bta-miR-30a-5p	NA	NA	NA	NA	NA	NA
TCCTTCATTCCACCGGAGTCTGA	miRNA	ssc-miR-205	mature	known	non-templated	pig	ssc-miR-205	NA		NA	NA	NA	ENST00000384891,gene_biotype:processed_transcript,gene_symbol:MIR205HG
TCCTTGACTGGAAGCC	miRNA	ssc-miR-30e-5p	mature	known	non-templated	pig	ssc-miR-30e-5p	NA	NA	NA	NA	NA	NA
TCGGCGTGGCGTCGGTCGTGA	miRNA	ssc-miR-1307	mature	known	non-templated	pig	ssc-miR-1307	NA		NA	NA	NA	ENST00000408840
TCGGCGTGGCGTCGGTCGTGC	miRNA	ssc-miR-1307	mature	known	non-templated	pig	ssc-miR-1307	NA		NA	NA	NA	ENST00000408840
TCGGCGTGGCGTCGGTCGTGT	miRNA	ssc-miR-1307	mature	known	non-templated	pig	ssc-miR-1307	NA		NA	NA	NA	ENST00000408840
TCTGGACTTGGAGTCAGAAGG	miRNA	bta-miR-378d	mature	novel	non-templated	cattle	bta-miR-378d	NA		NA	NA	NA	ENST00000612936
TCTGGCTCCGTGTCTTCACTCCT	miRNA	ssc-miR-149	mature	known	non-templated	pig	ssc-miR-149	NA	NA	NA	NA	NA	NA
TCTGTACTCCAGCCTGGGCAACATAGCGAGACCCCGTCTCTA	miRNA	ssc-miR-1285	mature	known	non-templated	pig	ssc-miR-1285	NA		NA	NA	NA	NA
TCTGTACTCCAGCCTGGGCAACATAGCGAGACCCCGTCTCTT	miRNA	ssc-miR-1285	mature	known	non-templated	pig	ssc-miR-1285	NA		NA	NA	NA	NA
TCTGTACTCCAGCCTGGGCAACATAGCGAGACCCCGTCTCTTA	miRNA	ssc-miR-1285	mature	known	non-templated	pig	ssc-miR-1285	NA		NA	NA	NA	NA
TCTTTGGTTATCTAGCTGTATGT	miRNA	ssc-miR-9	mature	known	non-templated	pig	ssc-miR-9	NA		NA	NA	NA	ENST00000384838,gene_biotype:lincRNA,gene_symbol:LINC00461
TGAAATGTTTAGGACCACA	miRNA	hsa-miR-203a-3p	mature	novel	non-templated	human	hsa-miR-203a-3p	NA	NA	NA	NA	NA	NA
TGAAATGTTTAGGACCACC	miRNA	hsa-miR-203a-3p	mature	novel	non-templated	human	hsa-miR-203a-3p	NA	NA	NA	NA	NA	NA
TGAAATGTTTAGGACCACG	miRNA	hsa-miR-203a-3p	mature	novel	non-templated	human	hsa-miR-203a-3p	NA	NA	NA	NA	NA	NA
TGAAATGTTTAGGACCACTAA	miRNA	hsa-miR-203a-3p	mature	novel	non-templated	human	hsa-miR-203a-3p	NA	NA	NA	NA	NA	NA
TGAAATGTTTAGGACCACTAC	miRNA	hsa-miR-203a-3p	mature	novel	non-templated	human	hsa-miR-203a-3p	NA	NA	NA	NA	NA	NA
TGAAATGTTTAGGACCACTAGC	miRNA	hsa-miR-203a-3p	mature	novel	non-templated	human	hsa-miR-203a-3p	NA	NA	NA	NA	NA	NA
TGAAATGTTTAGGACCACTAGG	miRNA	hsa-miR-203a-3p	mature	novel	non-templated	human	hsa-miR-203a-3p	NA	NA	NA	NA	NA	NA
TGAAATGTTTAGGACCACTAGT	miRNA	hsa-miR-203a-3p	mature	novel	non-templated	human	hsa-miR-203a-3p	NA	NA	NA	NA	NA	NA
TGAAATGTTTAGGACCACTAT	miRNA	hsa-miR-203a-3p	mature	novel	non-templated	human	hsa-miR-203a-3p	NA	NA	NA	NA	NA	NA
TGAATAAAGTCGTGATACTGTAAACGCTTTCTGATG	miRNA	hsa-miR-3607-3p	mature	novel	non-templated	human	hsa-miR-3607-3p	NA		NA	NA	NA	NA
TGAATAAAGTCGTGATACTGTAAACGCTTTCTGATGTA	miRNA	hsa-miR-3607-3p	mature	novel	non-templated	human	hsa-miR-3607-3p	NA		NA	NA	NA	NA
TGAGACCTCTGGGTTCTGAGCC	miRNA	ssc-miR-769-5p	mature	known	non-templated	pig	ssc-miR-769-5p	NA		NA	NA	NA	NA
TGAGATGAAGCACTGTAGCTCC	miRNA	ssc-miR-143-3p	mature	known	non-templated	pig	ssc-miR-143-3p	NA		NA	NA	NA	ENST00000385300,gene_biotype:lincRNA,gene_symbol:CARMN
TGAGATGAAGCACTGTAGCTCT	miRNA	ssc-miR-143-3p	mature	known	non-templated	pig	ssc-miR-143-3p	NA		NA	NA	NA	ENST00000385300,gene_biotype:lincRNA,gene_symbol:CARMN
TGAGATGAAGCACTGTAGCTT	miRNA	ssc-miR-143-3p	mature	known	non-templated	pig	ssc-miR-143-3p	NA		NA	NA	NA	ENST00000385300,gene_biotype:lincRNA,gene_symbol:CARMN
TGAGGGGCAGAGAGCGAGACA	miRNA	ssc-miR-423-5p	mature	known	non-templated	pig	ssc-miR-423-5p	NA		NA	NA	NA	ENST00000362201
TGAGGGGCAGAGAGCGAGACC	miRNA	ssc-miR-423-5p	mature	known	non-templated	pig	ssc-miR-423-5p	NA		NA	NA	NA	ENST00000362201
TGAGGGGCAGAGAGCGAGACTC	miRNA	ssc-miR-423-5p	mature	known	non-templated	pig	ssc-miR-423-5p	NA		NA	NA	NA	ENST00000362201
TGAGGGGCAGAGAGCGAGACTTA	miRNA	ssc-miR-423-5p	mature	known	non-templated	pig	ssc-miR-423-5p	NA		NA	NA	NA	ENST00000362201
TGAGGGGCAGAGAGCGAGACTTC	miRNA	ssc-miR-423-5p	mature	known	non-templated	pig	ssc-miR-423-5p	NA		NA	NA	NA	ENST00000362201
TGAGGGGCAGAGAGCGAGACTTG	miRNA	ssc-miR-423-5p	mature	known	non-templated	pig	ssc-miR-423-5p	NA		NA	NA	NA	ENST00000362201
TGAGGGGCAGAGAGCGAGACTTTA	miRNA	ssc-miR-423-5p	mature	known	non-templated	pig	ssc-miR-423-5p	NA		NA	NA	NA	ENST00000362201
TGAGGGGCAGAGAGCGAGACTTTC	miRNA	ssc-miR-423-5p	mature	known	non-templated	pig	ssc-miR-423-5p	NA		NA	NA	NA	ENST00000362201
TGAGGTAGGAGGTTGTATAGC	miRNA	ssc-let-7e	mature	known	non-templated	pig	ssc-let-7e	NA	NA	NA	NA	NA	NA
TGAGGTAGGAGGTTGTATAGTC	miRNA	ssc-let-7e	mature	known	non-templated	pig	ssc-let-7e	NA		NA	NA	NA	NA
TGAGGTAGGAGGTTGTATAGTTT	miRNA	ssc-let-7e	mature	known	non-templated	pig	ssc-let-7e	NA		NA	NA	NA	ENST00000360737,gene_biotype:lincRNA,gene_symbol:MIRLET7BHG
TGAGGTAGTAAGTTGTATTGTC	miRNA	ssc-miR-98	mature	known	non-templated	pig	ssc-miR-98	NA	NA	NA	NA	NA	NA
TGAGGTAGTAGATTGTAC	miRNA	ssc-let-7f	mature	known	non-templated	pig	ssc-let-7f	NA	NA	NA	NA	NA	NA
TGAGGTAGTAGATTGTATAGC	miRNA	ssc-let-7f	mature	known	non-templated	pig	ssc-let-7f	NA	NA	NA	NA	NA	NA
TGAGGTAGTAGATTGTATAGG	miRNA	ssc-let-7f	mature	known	non-templated	pig	ssc-let-7f	NA	NA	NA	NA	NA	NA
TGAGGTAGTAGATTGTATAGTA	miRNA	ssc-let-7f	mature	known	non-templated	pig	ssc-let-7f	NA	NA	NA	NA	NA	NA
TGAGGTAGTAGATTGTATAGTC	miRNA	ssc-let-7f	mature	known	non-templated	pig	ssc-let-7f	NA	NA	NA	NA	NA	NA
TGAGGTAGTAGATTGTATAGTG	miRNA	ssc-let-7f	mature	known	non-templated	pig	ssc-let-7f	NA	NA	NA	NA	NA	NA
TGAGGTAGTAGATTGTATAGTTA	miRNA	ssc-let-7f	mature	known	non-templated	pig	ssc-let-7f	NA		NA	NA	NA	ENST00000360737,gene_biotype:lincRNA,gene_symbol:MIRLET7BHG
TGAGGTAGTAGATTGTATAGTTC	miRNA	ssc-let-7f	mature	known	non-templated	pig	ssc-let-7f	NA		NA	NA	NA	ENST00000360737,gene_biotype:lincRNA,gene_symbol:MIRLET7BHG
TGAGGTAGTAGGTTGTAC	miRNA	ssc-let-7a	mature	known	non-templated	pig	ssc-let-7a	NA		NA	NA	NA	ENST00000360737,gene_biotype:lincRNA,gene_symbol:MIRLET7BHG
TGAGGTAGTAGGTTGTATAGA	miRNA	ssc-let-7a	mature	known	non-templated	pig	ssc-let-7a	NA		NA	NA	NA	ENST00000360737,gene_biotype:lincRNA,gene_symbol:MIRLET7BHG
TGAGGTAGTAGGTTGTATAGC	miRNA	ssc-let-7a	mature	known	non-templated	pig	ssc-let-7a	NA		NA	NA	NA	ENST00000360737,gene_biotype:lincRNA,gene_symbol:MIRLET7BHG
TGAGGTAGTAGGTTGTATAGG	miRNA	ssc-let-7a	mature	known	non-templated	pig	ssc-let-7a	NA		NA	NA	NA	ENST00000360737,gene_biotype:lincRNA,gene_symbol:MIRLET7BHG
TGAGGTAGTAGGTTGTATAGTA	miRNA	ssc-let-7a	mature	known	non-templated	pig	ssc-let-7a	NA		NA	NA	NA	ENST00000360737,gene_biotype:lincRNA,gene_symbol:MIRLET7BHG
TGAGGTAGTAGGTTGTATAGTC	miRNA	ssc-let-7a	mature	known	non-templated	pig	ssc-let-7a	NA		NA	NA	NA	ENST00000360737,gene_biotype:lincRNA,gene_symbol:MIRLET7BHG
TGAGGTAGTAGGTTGTATAGTG	miRNA	ssc-let-7a	mature	known	non-templated	pig	ssc-let-7a	NA		NA	NA	NA	ENST00000360737,gene_biotype:lincRNA,gene_symbol:MIRLET7BHG
TGAGGTAGTAGGTTGTATAGTTA	miRNA	ssc-let-7a	mature	known	non-templated	pig	ssc-let-7a	NA		NA	NA	NA	ENST00000360737,gene_biotype:lincRNA,gene_symbol:MIRLET7BHG
TGAGGTAGTAGGTTGTATAGTTC	miRNA	ssc-let-7a	mature	known	non-templated	pig	ssc-let-7a	NA		NA	NA	NA	ENST00000360737,gene_biotype:lincRNA,gene_symbol:MIRLET7BHG
TGAGGTAGTAGGTTGTATGGTC	miRNA	ssc-let-7c	mature	known	non-templated	pig	ssc-let-7c	NA	NA	NA	NA	NA	NA
TGAGGTAGTAGGTTGTGTGGC	miRNA	bta-let-7b	mature	novel	non-templated	cattle	bta-let-7b	NA		NA	NA	NA	ENST00000360737,gene_biotype:lincRNA,gene_symbol:MIRLET7BHG
TGAGGTAGTAGGTTGTGTGGTA	miRNA	bta-let-7b	mature	novel	non-templated	cattle	bta-let-7b	NA		NA	NA	NA	ENST00000360737,gene_biotype:lincRNA,gene_symbol:MIRLET7BHG
TGAGGTAGTAGGTTGTGTGGTAT	miRNA	bta-let-7b	mature	novel	non-templated	cattle	bta-let-7b	NA		NA	NA	NA	ENST00000360737,gene_biotype:lincRNA,gene_symbol:MIRLET7BHG
TGAGGTAGTAGGTTGTGTGGTC	miRNA	bta-let-7b	mature	novel	non-templated	cattle	bta-let-7b	NA		NA	NA	NA	ENST00000360737,gene_biotype:lincRNA,gene_symbol:MIRLET7BHG
TGAGGTAGTAGGTTGTGTGGTG	miRNA	bta-let-7b	mature	novel	non-templated	cattle	bta-let-7b	NA		NA	NA	NA	ENST00000360737,gene_biotype:lincRNA,gene_symbol:MIRLET7BHG
TGAGGTAGTAGGTTGTGTGGTTA	miRNA	bta-let-7b	mature	novel	non-templated	cattle	bta-let-7b	NA		NA	NA	NA	ENST00000360737,gene_biotype:lincRNA,gene_symbol:MIRLET7BHG
TGAGGTAGTAGGTTGTGTGGTTAC	miRNA	bta-let-7b	mature	novel	non-templated	cattle	bta-let-7b	NA		NA	NA	NA	ENST00000360737,gene_biotype:lincRNA,gene_symbol:MIRLET7BHG
TGAGGTAGTAGGTTGTGTGGTTAT	miRNA	bta-let-7b	mature	novel	non-templated	cattle	bta-let-7b	NA		NA	NA	NA	ENST00000360737,gene_biotype:lincRNA,gene_symbol:MIRLET7BHG
TGAGGTAGTAGGTTGTGTGGTTC	miRNA	bta-let-7b	mature	novel	non-templated	cattle	bta-let-7b	NA		NA	NA	NA	ENST00000360737,gene_biotype:lincRNA,gene_symbol:MIRLET7BHG
TGAGGTAGTAGGTTGTGTGGTTTT	miRNA	bta-let-7b	mature	novel	non-templated	cattle	bta-let-7b	NA		NA	NA	NA	ENST00000360737,gene_biotype:lincRNA,gene_symbol:MIRLET7BHG
TGAGGTAGTAGTTTGTACAGC	miRNA	ssc-let-7g	mature	known	non-templated	pig	ssc-let-7g	NA	NA	NA	NA	NA	NA
TGAGGTAGTAGTTTGTACAGTA	miRNA	ssc-let-7g	mature	known	non-templated	pig	ssc-let-7g	NA	NA	NA	NA	NA	NA
TGAGGTAGTAGTTTGTACAGTC	miRNA	ssc-let-7g	mature	known	non-templated	pig	ssc-let-7g	NA	NA	NA	NA	NA	NA
TGAGGTAGTAGTTTGTACAGTG	miRNA	ssc-let-7g	mature	known	non-templated	pig	ssc-let-7g	NA	NA	NA	NA	NA	NA
TGAGGTAGTAGTTTGTACAGTTA	miRNA	ssc-let-7g	mature	known	non-templated	pig	ssc-let-7g	NA		NA	NA	NA	NA
TGAGGTAGTAGTTTGTACAGTTC	miRNA	ssc-let-7g	mature	known	non-templated	pig	ssc-let-7g	NA		NA	NA	NA	NA
TGAGGTAGTAGTTTGTGCC	miRNA	ssc-let-7i	mature	known	non-templated	pig	ssc-let-7i	NA	NA	NA	NA	NA	NA
TGAGGTAGTAGTTTGTGCCGTT	miRNA	ssc-let-7i	mature	known	non-templated	pig	ssc-let-7i	NA	NA	NA	NA	NA	NA
TGAGGTAGTAGTTTGTGCTGC	miRNA	ssc-let-7i	mature	known	non-templated	pig	ssc-let-7i	NA		NA	NA	NA	NA
TGAGGTAGTAGTTTGTGCTGCT	miRNA	ssc-let-7i	mature	known	non-templated	pig	ssc-let-7i	NA		NA	NA	NA	NA
TGAGGTAGTAGTTTGTGCTGG	miRNA	ssc-let-7i	mature	known	non-templated	pig	ssc-let-7i	NA		NA	NA	NA	NA
TGAGGTAGTAGTTTGTGCTGGT	miRNA	ssc-let-7i	mature	known	non-templated	pig	ssc-let-7i	NA		NA	NA	NA	NA
TGAGGTAGTAGTTTGTGCTGTA	miRNA	ssc-let-7i	mature	known	non-templated	pig	ssc-let-7i	NA		NA	NA	NA	NA
TGAGGTAGTAGTTTGTGCTGTC	miRNA	ssc-let-7i	mature	known	non-templated	pig	ssc-let-7i	NA		NA	NA	NA	NA
TGAGGTAGTAGTTTGTGCTGTG	miRNA	ssc-let-7i	mature	known	non-templated	pig	ssc-let-7i	NA		NA	NA	NA	NA
TGAGGTAGTAGTTTGTGCTGTTA	miRNA	ssc-let-7i	mature	known	non-templated	pig	ssc-let-7i	NA		NA	NA	NA	NA
TGAGGTAGTAGTTTGTGCTGTTAA	miRNA	ssc-let-7i	mature	known	non-templated	pig	ssc-let-7i	NA		NA	NA	NA	NA
TGAGGTAGTAGTTTGTGCTGTTAT	miRNA	ssc-let-7i	mature	known	non-templated	pig	ssc-let-7i	NA		NA	NA	NA	NA
TGAGGTAGTAGTTTGTGCTGTTC	miRNA	ssc-let-7i	mature	known	non-templated	pig	ssc-let-7i	NA		NA	NA	NA	NA
TGAGGTAGTAGTTTGTGCTGTTT	miRNA	ssc-let-7i	mature	known	non-templated	pig	ssc-let-7i	NA		NA	NA	NA	NA
TGAGGTAGTAGTTTGTGCTGTTTT	miRNA	ssc-let-7i	mature	known	non-templated	pig	ssc-let-7i	NA		NA	NA	NA	NA
TGCATGTGATGAAGCAAATCAGTATGAATAAAGTCGTGATACTGTAAACACTTTCTGATGTA	miRNA	hsa-miR-3607-5p	mature	novel	non-templated	human	hsa-miR-3607-5p	NA		NA	NA	NA	NA
TGCATGTGATGAAGCAAATCAGTATGAATAAAGTCGTGATACTGTAAACGCTTTCTGATG	miRNA	hsa-miR-3607-5p	mature	novel	non-templated	human	hsa-miR-3607-5p	NA		NA	NA	NA	NA
TGCATGTGATGAAGCAAATCAGTATGAATAAAGTCGTGATACTGTAAACGCTTTCTGATGT	miRNA	hsa-miR-3607-5p	mature	novel	non-templated	human	hsa-miR-3607-5p	NA		NA	NA	NA	NA
TGCATGTGATGAAGCAAATCAGTATGAATAAAGTCGTGATACTGTAAACGCTTTCTGATGTA	miRNA	hsa-miR-3607-5p	mature	novel	non-templated	human	hsa-miR-3607-5p	NA		NA	NA	NA	NA
TGCGGAACCTGCGGATACGGA	miRNA	ssc-miR-7134-3p	mature	known	non-templated	pig	ssc-miR-7134-3p	NA	NA	NA	NA	NA	NA
TGCGGGGCTAGGGCTAACAGCG	miRNA	ssc-miR-744	mature	known	non-templated	pig	ssc-miR-744	NA	NA	NA	NA	NA	NA
TGCGGGGCTAGGGCTAACAGT	miRNA	ssc-miR-744	mature	known	non-templated	pig	ssc-miR-744	NA	NA	NA	NA	NA	NA
TGGAAGACTAGTGATTTTGTC	miRNA	ssc-miR-7	mature	known	non-templated	pig	ssc-miR-7	NA		NA	NA	NA	ENST00000384871
TGGAAGACTAGTGATTTTGTTA	miRNA	ssc-miR-7	mature	known	non-templated	pig	ssc-miR-7	NA		NA	NA	NA	ENST00000384871
TGGAAGACTAGTGATTTTGTTGA	miRNA	ssc-miR-7	mature	known	non-templated	pig	ssc-miR-7	NA		NA	NA	NA	ENST00000384871
TGGAAGACTAGTGATTTTGTTGC	miRNA	ssc-miR-7	mature	known	non-templated	pig	ssc-miR-7	NA		NA	NA	NA	ENST00000384871
TGGAAGACTAGTGATTTTGTTGCC	miRNA	hsa-miR-7-5p	mature	novel	non-templated	human	hsa-miR-7-5p	NA		NA	NA	NA	ENST00000384871
TGGAAGACTAGTGATTTTGTTGCT	miRNA	hsa-miR-7-5p	mature	novel	non-templated	human	hsa-miR-7-5p	NA		NA	NA	NA	ENST00000384871
TGGAAGACTAGTGATTTTGTTGG	miRNA	ssc-miR-7	mature	known	non-templated	pig	ssc-miR-7	NA		NA	NA	NA	ENST00000384871
TGGAAGACTAGTGATTTTGTTGGT	miRNA	hsa-miR-7-5p	mature	novel	non-templated	human	hsa-miR-7-5p	NA		NA	NA	NA	ENST00000384871
TGGAAGACTAGTGATTTTGTTGTA	miRNA	ssc-miR-7	mature	known	non-templated	pig	ssc-miR-7	NA		NA	NA	NA	ENST00000384871
TGGAAGACTAGTGATTTTGTTGTAA	miRNA	ssc-miR-7	mature	known	non-templated	pig	ssc-miR-7	NA		NA	NA	NA	ENST00000384871
TGGAAGACTAGTGATTTTGTTGTAAA	miRNA	ssc-miR-7	mature	known	non-templated	pig	ssc-miR-7	NA		NA	NA	NA	NA
TGGAAGACTAGTGATTTTGTTGTAGA	miRNA	ssc-miR-7	mature	known	non-templated	pig	ssc-miR-7	NA		NA	NA	NA	NA
TGGAAGACTAGTGATTTTGTTGTC	miRNA	ssc-miR-7	mature	known	non-templated	pig	ssc-miR-7	NA		NA	NA	NA	ENST00000384871
TGGAAGACTAGTGATTTTGTTGTG	miRNA	ssc-miR-7	mature	known	non-templated	pig	ssc-miR-7	NA		NA	NA	NA	ENST00000384871
TGGAAGACTAGTGATTTTGTTGTTA	miRNA	ssc-miR-7	mature	known	non-templated	pig	ssc-miR-7	NA		NA	NA	NA	ENST00000384871
TGGAAGACTAGTGATTTTGTTGTTAA	miRNA	ssc-miR-7	mature	known	non-templated	pig	ssc-miR-7	NA		NA	NA	NA	ENST00000384871
TGGAAGACTAGTGATTTTGTTGTTAAA	miRNA	ssc-miR-7	mature	known	non-templated	pig	ssc-miR-7	NA		NA	NA	NA	NA
TGGAAGACTAGTGATTTTGTTGTTAAAA	miRNA	ssc-miR-7	mature	known	non-templated	pig	ssc-miR-7	NA		NA	NA	NA	NA
TGGAAGACTAGTGATTTTGTTGTTAAAAT	miRNA	ssc-miR-7	mature	known	non-templated	pig	ssc-miR-7	NA		NA	NA	NA	NA
TGGAAGACTAGTGATTTTGTTGTTAAAT	miRNA	ssc-miR-7	mature	known	non-templated	pig	ssc-miR-7	NA		NA	NA	NA	NA
TGGAAGACTAGTGATTTTGTTGTTAAC	miRNA	ssc-miR-7	mature	known	non-templated	pig	ssc-miR-7	NA		NA	NA	NA	NA
TGGAAGACTAGTGATTTTGTTGTTAAG	miRNA	ssc-miR-7	mature	known	non-templated	pig	ssc-miR-7	NA		NA	NA	NA	NA
TGGAAGACTAGTGATTTTGTTGTTAAT	miRNA	ssc-miR-7	mature	known	non-templated	pig	ssc-miR-7	NA		NA	NA	NA	NA
TGGAAGACTAGTGATTTTGTTGTTAGA	miRNA	ssc-miR-7	mature	known	non-templated	pig	ssc-miR-7	NA		NA	NA	NA	NA
TGGAAGACTAGTGATTTTGTTGTTAT	miRNA	ssc-miR-7	mature	known	non-templated	pig	ssc-miR-7	NA		NA	NA	NA	ENST00000384871
TGGAATGTAAAGAAGTATGTAC	miRNA	ssc-miR-1	mature	known	non-templated	pig	ssc-miR-1	NA		NA	NA	NA	ENST00000384961,gene_biotype:antisense,gene_symbol:MIR133A1HG
TGGACGGAGAACTGATAAGGGC	miRNA	ssc-miR-184	mature	known	non-templated	pig	ssc-miR-184	NA	NA	NA	NA	NA	NA
TGGACTTGGAGTCAGAAGGA	miRNA	ssc-miR-378	mature	known	non-templated	pig	ssc-miR-378	NA		NA	NA	NA	ENST00000612936
TGGACTTGGAGTCAGAAGGCA	miRNA	ssc-miR-378	mature	known	non-templated	pig	ssc-miR-378	NA	NA	NA	NA	NA	NA
TGGACTTGGAGTCAGAAGGT	miRNA	ssc-miR-378	mature	known	non-templated	pig	ssc-miR-378	NA		NA	NA	NA	ENST00000612936
TGGAGAGAAAGGCAGTTCCTGAA	miRNA	ssc-miR-185	mature	known	non-templated	pig	ssc-miR-185	NA		NA	NA	NA	NA
TGGAGAGAAAGGCAGTTCCTGAAA	miRNA	ssc-miR-185	mature	known	non-templated	pig	ssc-miR-185	NA		NA	NA	NA	NA
TGGAGAGAAAGGCAGTTCCTGG	miRNA	ssc-miR-185	mature	known	non-templated	pig	ssc-miR-185	NA	NA	NA	NA	NA	NA
TGGAGAGAAAGGCAGTTCCTGT	miRNA	ssc-miR-185	mature	known	non-templated	pig	ssc-miR-185	NA	NA	NA	NA	NA	NA
TGGAGTGTGACAATGGTGTC	miRNA	ssc-miR-122	mature	known	non-templated	pig	ssc-miR-122	NA		NA	NA	NA	ENST00000385044,gene_biotype:lincRNA,gene_symbol:MIR122
TGGAGTGTGACAATGGTGTTC	miRNA	ssc-miR-122	mature	known	non-templated	pig	ssc-miR-122	NA		NA	NA	NA	ENST00000385044,gene_biotype:lincRNA,gene_symbol:MIR122
TGGAGTGTGACAATGGTGTTTA	miRNA	ssc-miR-122	mature	known	non-templated	pig	ssc-miR-122	NA		NA	NA	NA	ENST00000385044,gene_biotype:lincRNA,gene_symbol:MIR122
TGGAGTGTGACAATGGTGTTTGA	miRNA	ssc-miR-122	mature	known	non-templated	pig	ssc-miR-122	NA		NA	NA	NA	ENST00000385044,gene_biotype:lincRNA,gene_symbol:MIR122
TGGAGTGTGACAATGGTGTTTGAA	miRNA	ssc-miR-122	mature	known	non-templated	pig	ssc-miR-122	NA		NA	NA	NA	ENST00000385044,gene_biotype:lincRNA,gene_symbol:MIR122
TGGAGTGTGACAATGGTGTTTGC	miRNA	ssc-miR-122	mature	known	non-templated	pig	ssc-miR-122	NA		NA	NA	NA	ENST00000385044,gene_biotype:lincRNA,gene_symbol:MIR122
TGGATTGTTCTCCAACCTGGCTCC	miRNA	ssc-miR-7857-3p	mature	known	non-templated	pig	ssc-miR-7857-3p	NA	NA	NA	NA	NA	NA
TGGCAGTGTATTGTTAGCTGGA	miRNA	bta-miR-449a	mature	novel	non-templated	cattle	bta-miR-449a	NA	NA	NA	NA	NA	NA
TGGCAGTGTATTGTTAGCTGGC	miRNA	bta-miR-449a	mature	novel	non-templated	cattle	bta-miR-449a	NA	NA	NA	NA	NA	NA
TGGCCCTGACTGAAGACCTGCAGTC	miRNA	bta-miR-1291	mature	novel	non-templated	cattle	bta-miR-1291	NA		NA	NA	NA	ENST00000408564,gene_biotype:snoRNA,gene_symbol:SNORA2C
TGGCTCAGTTCAGCAGGAACAA	miRNA	ssc-miR-24-3p	mature	known	non-templated	pig	ssc-miR-24-3p	NA		NA	NA	NA	ENST00000386972,gene_biotype:lincRNA,gene_symbol:MIR24-2
TGGCTCAGTTCAGCAGGAACAGA	miRNA	ssc-miR-24-3p	mature	known	non-templated	pig	ssc-miR-24-3p	NA		NA	NA	NA	ENST00000386972,gene_biotype:lincRNA,gene_symbol:MIR24-2
TGGCTCAGTTCAGCAGGAACAGC	miRNA	ssc-miR-24-3p	mature	known	non-templated	pig	ssc-miR-24-3p	NA		NA	NA	NA	ENST00000386972,gene_biotype:lincRNA,gene_symbol:MIR24-2
TGGCTCAGTTCAGCAGGAACAGT	miRNA	ssc-miR-24-3p	mature	known	non-templated	pig	ssc-miR-24-3p	NA		NA	NA	NA	ENST00000386972,gene_biotype:lincRNA,gene_symbol:MIR24-2
TGGCTCAGTTCAGCAGGAAT	miRNA	ssc-miR-24-3p	mature	known	non-templated	pig	ssc-miR-24-3p	NA		NA	NA	NA	ENST00000386972,gene_biotype:lincRNA,gene_symbol:MIR24-2
TGTAAACATCCCCGACTGGAAA	miRNA	ssc-miR-30d	mature	known	non-templated	pig	ssc-miR-30d	NA	NA	NA	NA	NA	NA
TGTAAACATCCCCGACTGGAAACT	miRNA	hsa-miR-30d-5p	mature	novel	non-templated	human	hsa-miR-30d-5p	NA	NA	NA	NA	NA	NA
TGTAAACATCCCCGACTGGAAGA	miRNA	ssc-miR-30d	mature	known	non-templated	pig	ssc-miR-30d	NA		NA	NA	NA	NA
TGTAAACATCCCCGACTGGAAGCA	miRNA	ssc-miR-30d	mature	known	non-templated	pig	ssc-miR-30d	NA		NA	NA	NA	NA
TGTAAACATCCCCGACTGGAAGCC	miRNA	ssc-miR-30d	mature	known	non-templated	pig	ssc-miR-30d	NA		NA	NA	NA	NA
TGTAAACATCCCCGACTGGAAGCG	miRNA	ssc-miR-30d	mature	known	non-templated	pig	ssc-miR-30d	NA		NA	NA	NA	NA
TGTAAACATCCCCGACTGGAAGCTA	miRNA	ssc-miR-30d	mature	known	non-templated	pig	ssc-miR-30d	NA		NA	NA	NA	NA
TGTAAACATCCCCGACTGGAAGCTC	miRNA	ssc-miR-30d	mature	known	non-templated	pig	ssc-miR-30d	NA		NA	NA	NA	NA
TGTAAACATCCCCGACTGGAAGCTT	miRNA	ssc-miR-30d	mature	known	non-templated	pig	ssc-miR-30d	NA		NA	NA	NA	NA
TGTAAACATCCCCGACTGGAAGCTTT	miRNA	ssc-miR-30d	mature	known	non-templated	pig	ssc-miR-30d	NA		NA	NA	NA	NA
TGTAAACATCCCCGACTGGAAGG	miRNA	ssc-miR-30d	mature	known	non-templated	pig	ssc-miR-30d	NA		NA	NA	NA	NA
TGTAAACATCCCCGACTGGAAGT	miRNA	ssc-miR-30d	mature	known	non-templated	pig	ssc-miR-30d	NA		NA	NA	NA	NA
TGTAAACATCCCCGACTGGAAGTT	miRNA	hsa-miR-30d-5p	mature	novel	non-templated	human	hsa-miR-30d-5p	NA		NA	NA	NA	NA
TGTAAACATCCCCGACTGGAAT	miRNA	ssc-miR-30d	mature	known	non-templated	pig	ssc-miR-30d	NA	NA	NA	NA	NA	NA
TGTAAACATCCTACACTCAGCC	miRNA	ssc-miR-30b-5p	mature	known	non-templated	pig	ssc-miR-30b-5p	NA	NA	NA	NA	NA	NA
TGTAAACATCCTACACTCTCAGA	miRNA	ssc-miR-30c-5p	mature	known	non-templated	pig	ssc-miR-30c-5p	NA	NA	NA	NA	NA	NA
TGTAAACATCCTACACTCTCAGCA	miRNA	ssc-miR-30c-5p	mature	known	non-templated	pig	ssc-miR-30c-5p	NA		NA	NA	NA	NA
TGTAAACATCCTACACTCTCAGCC	miRNA	ssc-miR-30c-5p	mature	known	non-templated	pig	ssc-miR-30c-5p	NA		NA	NA	NA	NA
TGTAAACATCCTACACTCTCAGCG	miRNA	ssc-miR-30c-5p	mature	known	non-templated	pig	ssc-miR-30c-5p	NA		NA	NA	NA	NA
TGTAAACATCCTACACTCTCAGCTA	miRNA	ssc-miR-30c-5p	mature	known	non-templated	pig	ssc-miR-30c-5p	NA		NA	NA	NA	NA
TGTAAACATCCTACACTCTCAGCTAA	miRNA	ssc-miR-30c-5p	mature	known	non-templated	pig	ssc-miR-30c-5p	NA		NA	NA	NA	NA
TGTAAACATCCTACACTCTCAGCTAAA	miRNA	ssc-miR-30c-5p	mature	known	non-templated	pig	ssc-miR-30c-5p	NA		NA	NA	NA	NA
TGTAAACATCCTACACTCTCAGCTT	miRNA	ssc-miR-30c-5p	mature	known	non-templated	pig	ssc-miR-30c-5p	NA		NA	NA	NA	NA
TGTAAACATCCTACACTCTCAGT	miRNA	ssc-miR-30c-5p	mature	known	non-templated	pig	ssc-miR-30c-5p	NA	NA	NA	NA	NA	NA
TGTAAACATCCTCGACTGGAAA	miRNA	ssc-miR-30a-5p	mature	known	non-templated	pig	ssc-miR-30a-5p	NA	NA	NA	NA	NA	NA
TGTAAACATCCTCGACTGGAAGA	miRNA	ssc-miR-30a-5p	mature	known	non-templated	pig	ssc-miR-30a-5p	NA		NA	NA	NA	NA
TGTAAACATCCTCGACTGGAAGCA	miRNA	ssc-miR-30a-5p	mature	known	non-templated	pig	ssc-miR-30a-5p	NA		NA	NA	NA	NA
TGTAAACATCCTCGACTGGAAGCC	miRNA	ssc-miR-30a-5p	mature	known	non-templated	pig	ssc-miR-30a-5p	NA		NA	NA	NA	NA
TGTAAACATCCTCGACTGGAAGCG	miRNA	ssc-miR-30a-5p	mature	known	non-templated	pig	ssc-miR-30a-5p	NA		NA	NA	NA	NA
TGTAAACATCCTCGACTGGAAGCTT	miRNA	ssc-miR-30a-5p	mature	known	non-templated	pig	ssc-miR-30a-5p	NA		NA	NA	NA	NA
TGTAAACATCCTCGACTGGAAGCTTT	miRNA	ssc-miR-30a-5p	mature	known	non-templated	pig	ssc-miR-30a-5p	NA		NA	NA	NA	NA
TGTAAACATCCTCGACTGGAAGT	miRNA	ssc-miR-30a-5p	mature	known	non-templated	pig	ssc-miR-30a-5p	NA		NA	NA	NA	NA
TGTAAACATCCTTGACTGGAAGCA	miRNA	ssc-miR-30e-5p	mature	known	non-templated	pig	ssc-miR-30e-5p	NA		NA	NA	NA	NA
TGTAAACATCCTTGACTGGAAGCC	miRNA	ssc-miR-30e-5p	mature	known	non-templated	pig	ssc-miR-30e-5p	NA		NA	NA	NA	NA
TGTAAACATCCTTGACTGGAAGCG	miRNA	ssc-miR-30e-5p	mature	known	non-templated	pig	ssc-miR-30e-5p	NA		NA	NA	NA	NA
TGTAAACATCCTTGACTGGAAGCTT	miRNA	ssc-miR-30e-5p	mature	known	non-templated	pig	ssc-miR-30e-5p	NA		NA	NA	NA	NA
TGTAAACATCCTTGACTGGAAGCTTT	miRNA	ssc-miR-30e-5p	mature	known	non-templated	pig	ssc-miR-30e-5p	NA		NA	NA	NA	NA
TGTAAACATCCTTGACTGGAAGT	miRNA	ssc-miR-30e-5p	mature	known	non-templated	pig	ssc-miR-30e-5p	NA		NA	NA	NA	NA
TGTACTCCAGCCTGGGCAACATAGCGAGACCCCGTCTCTA	miRNA	ssc-miR-1285	mature	known	non-templated	pig	ssc-miR-1285	NA		NA	NA	NA	ENST00000618786,gene_biotype:misc_RNA,gene_symbol:RN7SL1
TGTACTCCAGCCTGGGCAACATAGCGAGACCCCGTCTCTC	miRNA	ssc-miR-1285	mature	known	non-templated	pig	ssc-miR-1285	NA		NA	NA	NA	ENST00000618786,gene_biotype:misc_RNA,gene_symbol:RN7SL1
TGTACTCCAGCCTGGGCAACATAGCGAGACCCCGTCTCTTA	miRNA	ssc-miR-1285	mature	known	non-templated	pig	ssc-miR-1285	NA		NA	NA	NA	ENST00000626159
TGTGAAATGTTTAGGACCACC	miRNA	hsa-miR-203a-3p	mature	novel	non-templated	human	hsa-miR-203a-3p	NA	NA	NA	NA	NA	NA
TGTGCAAATCCATGCAAAACTGC	miRNA	ssc-miR-19a	mature	known	non-templated	pig	ssc-miR-19a	NA		NA	NA	NA	ENST00000384829,gene_biotype:processed_transcript,gene_symbol:MIR17HG
TGTGCAAATCCATGCAAAACTGT	miRNA	ssc-miR-19a	mature	known	non-templated	pig	ssc-miR-19a	NA		NA	NA	NA	ENST00000384829,gene_biotype:processed_transcript,gene_symbol:MIR17HG
TGTGCAAATCTATGCAAAACTGT	miRNA	ssc-miR-19a	mature	known	non-templated	pig	ssc-miR-19a	NA		NA	NA	NA	ENST00000384878,gene_biotype:processed_transcript,gene_symbol:MIR17HG
TTAAACGTGGATGTACTTGCA	miRNA	hsa-miR-302a-5p	mature	novel	non-templated	human	hsa-miR-302a-5p	NA	NA	NA	NA	NA	NA
TTAAACGTGGATGTACTTGCC	miRNA	hsa-miR-302a-5p	mature	novel	non-templated	human	hsa-miR-302a-5p	NA	NA	NA	NA	NA	NA
TTAAACGTGGATGTACTTGCTA	miRNA	hsa-miR-302a-5p	mature	novel	non-templated	human	hsa-miR-302a-5p	NA	NA	NA	NA	NA	NA
TTAAACGTGGATGTACTTGCTC	miRNA	hsa-miR-302a-5p	mature	novel	non-templated	human	hsa-miR-302a-5p	NA	NA	NA	NA	NA	NA
TTAAACGTGGATGTACTTGCTG	miRNA	hsa-miR-302a-5p	mature	novel	non-templated	human	hsa-miR-302a-5p	NA	NA	NA	NA	NA	NA
TTAAATGGATTTTTGGAGCT	miRNA	bta-miR-1246	mature	novel	non-templated	cattle	bta-miR-1246	NA		NA	NA	NA	ENST00000410144,gene_biotype:snRNA,gene_symbol:RNU2-3P
TTACAGTACTGTGATAACTGAA	miRNA	ssc-miR-101	mature	known	non-templated	pig	ssc-miR-101	NA		NA	NA	NA	NA
TTATAAAGCAATGAGACTGATC	miRNA	ssc-miR-340	mature	known	non-templated	pig	ssc-miR-340	NA	NA	NA	NA	NA	NA
TTATAATACAACCTGATAAGTA	miRNA	ssc-miR-374a-5p	mature	known	non-templated	pig	ssc-miR-374a-5p	NA	NA	NA	NA	NA	NA
TTATCAGAATCTCCAGGGGTAT	miRNA	ssc-miR-361-5p	mature	known	non-templated	pig	ssc-miR-361-5p	NA	NA	NA	NA	NA	NA
TTATCAGACTGATGTTGACA	miRNA	bta-miR-21-5p	mature	novel	non-templated	cattle	bta-miR-21-5p	NA		NA	NA	NA	ENST00000362134
TTATCAGACTGATGTTGAT	miRNA	ssc-miR-21	mature	known	non-templated	pig	ssc-miR-21	NA		NA	NA	NA	ENST00000362134
TTCAAGTAATCCAGGATAGGCA	miRNA	ssc-miR-26a	mature	known	non-templated	pig	ssc-miR-26a	NA	NA	NA	NA	NA	NA
TTCAAGTAATCCAGGATAGGCC	miRNA	ssc-miR-26a	mature	known	non-templated	pig	ssc-miR-26a	NA	NA	NA	NA	NA	NA
TTCAAGTAATCCAGGATAGGCG	miRNA	ssc-miR-26a	mature	known	non-templated	pig	ssc-miR-26a	NA	NA	NA	NA	NA	NA
TTCAAGTAATCCAGGATAGGCTA	miRNA	ssc-miR-26a	mature	known	non-templated	pig	ssc-miR-26a	NA		NA	NA	NA	NA
TTCAAGTAATCCAGGATAGGCTAA	miRNA	ssc-miR-26a	mature	known	non-templated	pig	ssc-miR-26a	NA		NA	NA	NA	NA
TTCAAGTAATCCAGGATAGGCTAT	miRNA	ssc-miR-26a	mature	known	non-templated	pig	ssc-miR-26a	NA		NA	NA	NA	NA
TTCAAGTAATCCAGGATAGGCTC	miRNA	ssc-miR-26a	mature	known	non-templated	pig	ssc-miR-26a	NA		NA	NA	NA	NA
TTCAAGTAATCCAGGATAGGCTT	miRNA	ssc-miR-26a	mature	known	non-templated	pig	ssc-miR-26a	NA		NA	NA	NA	NA
TTCAAGTAATCCAGGATAGGCTTT	miRNA	ssc-miR-26a	mature	known	non-templated	pig	ssc-miR-26a	NA		NA	NA	NA	NA
TTCAAGTAATCCAGGATAGGT	miRNA	ssc-miR-26a	mature	known	non-templated	pig	ssc-miR-26a	NA	NA	NA	NA	NA	NA
TTCAAGTAATTCAGGATAGGC	miRNA	bta-miR-26b	mature	novel	non-templated	cattle	bta-miR-26b	NA	NA	NA	NA	NA	NA
TTCAAGTAATTCAGGATAGGTA	miRNA	bta-miR-26b	mature	novel	non-templated	cattle	bta-miR-26b	NA		NA	NA	NA	NA
TTCAAGTAATTCAGGATAGGTC	miRNA	bta-miR-26b	mature	novel	non-templated	cattle	bta-miR-26b	NA		NA	NA	NA	NA
TTCAAGTAATTCAGGATAGGTG	miRNA	bta-miR-26b	mature	novel	non-templated	cattle	bta-miR-26b	NA		NA	NA	NA	NA
TTCAAGTAATTCAGGATAGGTTA	miRNA	bta-miR-26b	mature	novel	non-templated	cattle	bta-miR-26b	NA		NA	NA	NA	NA
TTCAAGTAATTCAGGATAGGTTT	miRNA	bta-miR-26b	mature	novel	non-templated	cattle	bta-miR-26b	NA		NA	NA	NA	NA
TTCACAGTGGCTAAGTTCA	miRNA	ssc-miR-27a	mature	known	non-templated	pig	ssc-miR-27a	NA	NA	NA	NA	NA	NA
TTCACAGTGGCTAAGTTCCA	miRNA	ssc-miR-27a	mature	known	non-templated	pig	ssc-miR-27a	NA	NA	NA	NA	NA	NA
TTCACAGTGGCTAAGTTCCGA	miRNA	ssc-miR-27a	mature	known	non-templated	pig	ssc-miR-27a	NA		NA	NA	NA	NA
TTCACAGTGGCTAAGTTCCGAT	miRNA	ssc-miR-27a	mature	known	non-templated	pig	ssc-miR-27a	NA		NA	NA	NA	NA
TTCACAGTGGCTAAGTTCCGATT	miRNA	ssc-miR-27a	mature	known	non-templated	pig	ssc-miR-27a	NA		NA	NA	NA	NA
TTCACAGTGGCTAAGTTCCGT	miRNA	ssc-miR-27a	mature	known	non-templated	pig	ssc-miR-27a	NA		NA	NA	NA	NA
TTCACAGTGGCTAAGTTCCGTTT	miRNA	ssc-miR-27a	mature	known	non-templated	pig	ssc-miR-27a	NA		NA	NA	NA	NA
TTCACAGTGGCTAAGTTCG	miRNA	ssc-miR-27a	mature	known	non-templated	pig	ssc-miR-27a	NA	NA	NA	NA	NA	NA
TTCACAGTGGCTAAGTTCTA	miRNA	ssc-miR-27b-3p	mature	known	non-templated	pig	ssc-miR-27b-3p	NA	NA	NA	NA	NA	NA
TTCACAGTGGCTAAGTTCTGA	miRNA	ssc-miR-27b-3p	mature	known	non-templated	pig	ssc-miR-27b-3p	NA	NA	NA	NA	NA	NA
TTCACAGTGGCTAAGTTCTGAAA	miRNA	ssc-miR-27b-3p	mature	known	non-templated	pig	ssc-miR-27b-3p	NA	NA	NA	NA	NA	NA
TTCACAGTGGCTAAGTTCTGCAA	miRNA	ssc-miR-27b-3p	mature	known	non-templated	pig	ssc-miR-27b-3p	NA		NA	NA	NA	NA
TTCACAGTGGCTAAGTTCTGCAT	miRNA	ssc-miR-27b-3p	mature	known	non-templated	pig	ssc-miR-27b-3p	NA		NA	NA	NA	NA
TTCACAGTGGCTAAGTTCTGCATT	miRNA	ssc-miR-27b-3p	mature	known	non-templated	pig	ssc-miR-27b-3p	NA		NA	NA	NA	NA
TTCACAGTGGCTAAGTTCTGCG	miRNA	ssc-miR-27b-3p	mature	known	non-templated	pig	ssc-miR-27b-3p	NA		NA	NA	NA	NA
TTCACAGTGGCTAAGTTCTGCT	miRNA	ssc-miR-27b-3p	mature	known	non-templated	pig	ssc-miR-27b-3p	NA		NA	NA	NA	NA
TTCACAGTGGCTAAGTTCTGCTT	miRNA	ssc-miR-27b-3p	mature	known	non-templated	pig	ssc-miR-27b-3p	NA		NA	NA	NA	NA
TTCACAGTGGCTAAGTTCTGT	miRNA	ssc-miR-27b-3p	mature	known	non-templated	pig	ssc-miR-27b-3p	NA	NA	NA	NA	NA	NA
TTCACAGTGGCTAAGTTCTT	miRNA	ssc-miR-27b-3p	mature	known	non-templated	pig	ssc-miR-27b-3p	NA	NA	NA	NA	NA	NA
TTCCCTTTGTCATCCTATGCCA	miRNA	ssc-miR-204	mature	known	non-templated	pig	ssc-miR-204	NA	NA	NA	NA	NA	NA
TTCCCTTTGTCATCCTATGCCC	miRNA	ssc-miR-204	mature	known	non-templated	pig	ssc-miR-204	NA	NA	NA	NA	NA	NA
TTCCCTTTGTCATCCTATGCCTGT	miRNA	ssc-miR-204	mature	known	non-templated	pig	ssc-miR-204	NA		NA	NA	NA	NA
TTGCACTTGTCCCGGCCTGC	miRNA	ssc-miR-92a	mature	known	non-templated	pig	ssc-miR-92a	NA		NA	NA	NA	ENST00000385233,gene_biotype:processed_transcript,gene_symbol:MIR17HG
TTGCACTTGTCCCGGCCTGTA	miRNA	ssc-miR-92a	mature	known	non-templated	pig	ssc-miR-92a	NA		NA	NA	NA	ENST00000385233,gene_biotype:processed_transcript,gene_symbol:MIR17HG
TTGGCAATGGTAGAACTCACACC	miRNA	ssc-miR-182	mature	known	non-templated	pig	ssc-miR-182	NA	NA	NA	NA	NA	NA
TTGGCAATGGTAGAACTCACACTA	miRNA	ssc-miR-182	mature	known	non-templated	pig	ssc-miR-182	NA	NA	NA	NA	NA	NA
TTGGCACTAGCACATTTTTGCC	miRNA	ssc-miR-96-5p	mature	known	non-templated	pig	ssc-miR-96-5p	NA	NA	NA	NA	NA	NA
TTGTACTCCAGCCTGGGCAACATAGCGAGACCCCGTCTCTT	miRNA	ssc-miR-1285	mature	known	non-templated	pig	ssc-miR-1285	NA		NA	NA	NA	ENST00000626159
TTGTGAAATGTTTAGGACCACC	miRNA	hsa-miR-203a-3p	mature	novel	non-templated	human	hsa-miR-203a-3p	NA	NA	NA	NA	NA	NA
TTGTTCTCCAACCTGGCTCTC	miRNA	ssc-miR-7857-3p	mature	known	non-templated	pig	ssc-miR-7857-3p	NA	NA	NA	NA	NA	NA
TTGTTCTCCAACCTGGCTCTTC	miRNA	ssc-miR-7857-3p	mature	known	non-templated	pig	ssc-miR-7857-3p	NA	NA	NA	NA	NA	NA
TTTCAGTCGGATGTTTACAGT	miRNA	ssc-miR-30e-3p	mature	known	non-templated	pig	ssc-miR-30e-3p	NA	NA	NA	NA	NA	NA
TTTGGCAATGGTAGAACTCACACA	miRNA	ssc-miR-182	mature	known	non-templated	pig	ssc-miR-182	NA	NA	NA	NA	NA	NA
TTTGGCAATGGTAGAACTCACACC	miRNA	ssc-miR-182	mature	known	non-templated	pig	ssc-miR-182	NA	NA	NA	NA	NA	NA
TTTGGCAATGGTAGAACTCACACG	miRNA	ssc-miR-182	mature	known	non-templated	pig	ssc-miR-182	NA	NA	NA	NA	NA	NA
TTTGGCAATGGTAGAACTCACACTA	miRNA	ssc-miR-182	mature	known	non-templated	pig	ssc-miR-182	NA		NA	NA	NA	NA
TTTGGCAATGGTAGAACTCACACTGA	miRNA	ssc-miR-182	mature	known	non-templated	pig	ssc-miR-182	NA		NA	NA	NA	NA
TTTGGCAATGGTAGAACTCACACTGGA	miRNA	ssc-miR-182	mature	known	non-templated	pig	ssc-miR-182	NA		NA	NA	NA	NA
TTTGGCACTAGCACATTTTTGCA	miRNA	ssc-miR-96-5p	mature	known	non-templated	pig	ssc-miR-96-5p	NA	NA	NA	NA	NA	NA
TTTGGCACTAGCACATTTTTGCC	miRNA	ssc-miR-96-5p	mature	known	non-templated	pig	ssc-miR-96-5p	NA	NA	NA	NA	NA	NA
TTTGTTCGTTCGGCTCGCGTGT	miRNA	bta-miR-375	mature	novel	non-templated	cattle	bta-miR-375	NA	NA	NA	NA	NA	NA
TTTGTTGGCTCCTCTGAAGTGT	miRNA	ssc-miR-7142-3p	mature	known	non-templated	pig	ssc-miR-7142-3p	NA	NA	NA	NA	NA	NA
TTTTTCATTATTGCTCCTGACA	miRNA	hsa-miR-335-3p	mature	novel	non-templated	human	hsa-miR-335-3p	NA	NA	NA	NA	NA	NA
TTTTTCATTATTGCTCCTGACT	miRNA	hsa-miR-335-3p	mature	novel	non-templated	human	hsa-miR-335-3p	NA	NA	NA	NA	NA	NA
AAAACGTGAGGCGCTGCTAT	miRNA	ssc-miR-424-3p	mature	known	templated	pig	ssc-miR-424-3p	ssc-mir-424	MI0013135	NA	NA	NA	ENST00000362227,gene_biotype:lincRNA,gene_symbol:MIR503HG
AAAACGTGAGGCGCTGCTATA	miRNA	ssc-miR-424-3p	mature	known	templated	pig	ssc-miR-424-3p	ssc-mir-424	MI0013135	NA	NA	NA	ENST00000362227,gene_biotype:lincRNA,gene_symbol:MIR503HG
AAAAGCTGGGTTGAGAGGGC	miRNA	ssc-miR-320	mature	known	templated	pig	ssc-miR-320	bta-mir-320a-2	MI0004748	NA	NA	NA	ENST00000390136
AAAAGCTGGGTTGAGAGGGCA	miRNA	ssc-miR-320	mature	known	templated	pig	ssc-miR-320	hsa-mir-320b-2	MI0003839	NA	NA	NA	NA
AAAAGCTGGGTTGAGAGGGCG	miRNA	ssc-miR-320	mature	known	templated	pig	ssc-miR-320	ssc-mir-320	MI0013097	NA	NA	NA	NA
AAAAGCTGGGTTGAGAGGGCGA	miRNA	ssc-miR-320	mature	known	templated	pig	ssc-miR-320	ssc-mir-320	MI0013097	NA	NA	NA	NA
AAAAGCTGGGTTGAGAGGGCGAA	miRNA	ssc-miR-320	mature	known	templated	pig	ssc-miR-320	ssc-mir-320	MI0013097	NA	NA	NA	NA
AAAAGCTGGGTTGAGAGGGCGAAA	miRNA	ssc-miR-320	mature	known	templated	pig	ssc-miR-320	ssc-mir-320	MI0013097	NA	NA	NA	NA
AAAAGCTGGGTTGAGAGGGCGAAAA	miRNA	ssc-miR-320	mature	known	templated	pig	ssc-miR-320	ssc-mir-320	MI0013097	NA	NA	NA	NA
AAAAGCTGGGTTGAGAGGGT	miRNA	ssc-miR-320	mature	known	templated	pig	ssc-miR-320	hsa-mir-320c-2	MI0008191	NA	NA	NA	ENST00000390136
AAAAGTGCTTACAGTGCAGGTAG	miRNA	ssc-miR-106a	mature	known	templated	pig	ssc-miR-106a	ssc-mir-106a	MI0002412	NA	NA	NA	ENST00000384870,gene_biotype:processed_transcript,gene_symbol:MIR92A2
AAACCCGTAGATCCGATCTTGT	miRNA	ssc-miR-99a	mature	known	templated	pig	ssc-miR-99a	ssc-mir-99a	MI0013114	NA	NA	NA	NA
AAACCGTTACCATTACTGAGT	miRNA	ssc-miR-451	mature	known	templated	pig	ssc-miR-451	ssc-mir-451	MI0016623	NA	NA	NA	ENST00000385059,gene_biotype:lincRNA,gene_symbol:MIR144
AAACGTGGATGTACTTGCT	miRNA	hsa-miR-302a-5p	mature	novel	templated	human	hsa-miR-302a-5p	bta-mir-302a	MI0009791	NA	NA	NA	NA
AAACGTGGATGTACTTGCTT	miRNA	hsa-miR-302a-5p	mature	novel	templated	human	hsa-miR-302a-5p	bta-mir-302a	MI0009791	NA	NA	NA	NA
AAACTGTGGGGGCACTT	miRNA	ssc-miR-371-5p	mature	known	templated	pig	ssc-miR-371-5p	ssc-mir-371	MI0031640	NA	NA	NA	NA
AAACTGTGGGGGCACTTT	miRNA	ssc-miR-371-5p	mature	known	templated	pig	ssc-miR-371-5p	ssc-mir-371	MI0031640	NA	NA	NA	NM_019117.4;mRNA
AAACTGTGGGGGCACTTTC	miRNA	ssc-miR-371-5p	mature	known	templated	pig	ssc-miR-371-5p	ssc-mir-371	MI0031640	NA	NA	NA	NA
AAAGAATTCTCCTTTTGGGC	miRNA	ssc-miR-186	mature	known	templated	pig	ssc-miR-186	ssc-mir-186	MI0002456	NA	NA	NA	NA
AAAGAATTCTCCTTTTGGGCT	miRNA	ssc-miR-186	mature	known	templated	pig	ssc-miR-186	ssc-mir-186	MI0002456	NA	NA	NA	NA
AAAGAATTCTCCTTTTGGGCTT	miRNA	ssc-miR-186	mature	known	templated	pig	ssc-miR-186	ssc-mir-186	MI0002456	NA	NA	NA	NA
AAAGCACACGGCCTGCAGAGAGT	miRNA	hsa-mir-330	precursor	novel	templated	human	NA	NA		NA	NA	NA	ENST00000362196
AAAGCTGGGTTGAGAGGGC	miRNA	ssc-miR-320	mature	known	templated	pig	ssc-miR-320	bta-mir-320a-2	MI0004748	NA	NA	NA	NA
AAAGCTGGGTTGAGAGGGCG	miRNA	ssc-miR-320	mature	known	templated	pig	ssc-miR-320	ssc-mir-320	MI0013097	NA	NA	NA	NA
AAAGCTGGGTTGAGAGGGCGA	miRNA	ssc-miR-320	mature	known	templated	pig	ssc-miR-320	ssc-mir-320	MI0013097	NA	NA	NA	NA
AAAGCTGGGTTGAGAGGGCGAA	miRNA	ssc-miR-320	mature	known	templated	pig	ssc-miR-320	ssc-mir-320	MI0013097	NA	NA	NA	NA
AAAGCTGGGTTGAGAGGGCGAAA	miRNA	ssc-miR-320	mature	known	templated	pig	ssc-miR-320	ssc-mir-320	MI0013097	NA	NA	NA	NA
AAAGCTGGGTTGAGAGGGCGAAAA	miRNA	hsa-miR-320c	mature	novel	templated	human	hsa-miR-320c	ssc-mir-320	MI0013097	NA	NA	NA	NA
AAAGTGCTGACAGTGCAGATA	miRNA	bta-miR-106b	mature	novel	templated	cattle	bta-miR-106b	bta-mir-106b	MI0009724	NA	NA	NA	NA
AAAGTGCTGTTCGTGCAGGTAG	miRNA	hsa-miR-93-5p	mature	novel	templated	human	hsa-miR-93-5p	bta-mir-93	MI0005050	NA	NA	NA	NA
AAAGTGCTTACAGTGCAGGT	miRNA	ssc-miR-106a	mature	known	templated	pig	ssc-miR-106a	ssc-mir-106a	MI0002412	NA	NA	NA	ENST00000384870,gene_biotype:processed_transcript,gene_symbol:MIR92A2
AAAGTGCTTACAGTGCAGGTAG	miRNA	ssc-miR-106a	mature	known	templated	pig	ssc-miR-106a	ssc-mir-106a	MI0002412	NA	NA	NA	ENST00000384870,gene_biotype:processed_transcript,gene_symbol:MIR92A2
AAAGTGCTTATAGTGCAGGT	miRNA	ssc-miR-20a	mature	known	templated	pig	ssc-miR-20a	ssc-mir-20a	MI0002423	NA	NA	NA	ENST00000362279,gene_biotype:processed_transcript,gene_symbol:MIR17HG
AAAGTGCTTATAGTGCAGGTAG	miRNA	ssc-miR-20a	mature	known	templated	pig	ssc-miR-20a	ssc-mir-20a	MI0002423	NA	NA	NA	ENST00000362279,gene_biotype:processed_transcript,gene_symbol:MIR17HG
AAAGTTCTGAGACACTCCGACT	miRNA	ssc-miR-148a-5p	mature	known	templated	pig	ssc-miR-148a-5p	ssc-mir-148a	MI0002418	NA	NA	NA	NA
AAATTCGTATCTAGGGGAAT	miRNA	ssc-miR-10a-3p	mature	known	templated	pig	ssc-miR-10a-3p	ssc-mir-10a	MI0013101	NA	NA	NA	ENST00000385043,gene_biotype:sense_intronic,gene_symbol:MIR10A
AACACTGTCTGGTAAC	miRNA	bta-miR-200a	mature	novel	templated	cattle	bta-miR-200a	bta-mir-200a	MI0005037	NA	NA	NA	NA
AACACTGTCTGGTAACG	miRNA	bta-miR-200a	mature	novel	templated	cattle	bta-miR-200a	bta-mir-200a	MI0005037	NA	NA	NA	NA
AACACTGTCTGGTAACGAT	miRNA	bta-miR-200a	mature	novel	templated	cattle	bta-miR-200a	bta-mir-200a	MI0005037	NA	NA	NA	NA
AACACTGTCTGGTAACGATG	miRNA	bta-miR-200a	mature	novel	templated	cattle	bta-miR-200a	bta-mir-200a	MI0005037	NA	NA	NA	NA
AACACTGTCTGGTAACGATGT	miRNA	bta-miR-200a	mature	novel	templated	cattle	bta-miR-200a	bta-mir-200a	MI0005037	NA	NA	NA	NA
AACACTGTCTGGTAACGATGTT	miRNA	bta-miR-200a	mature	novel	templated	cattle	bta-miR-200a	bta-mir-200a	MI0005037	NA	NA	NA	NA
AACATTCAACGCTGTCGGT	miRNA	ssc-miR-181a	mature	known	templated	pig	ssc-miR-181a	ssc-mir-181a-2	MI0013106	NA	NA	NA	NA
AACATTCAACGCTGTCGGTG	miRNA	ssc-miR-181a	mature	known	templated	pig	ssc-miR-181a	ssc-mir-181a-2	MI0013106	NA	NA	NA	NA
AACATTCAACGCTGTCGGTGA	miRNA	ssc-miR-181a	mature	known	templated	pig	ssc-miR-181a	ssc-mir-181a-2	MI0013106	NA	NA	NA	NA
AACATTCAACGCTGTCGGTGAG	miRNA	ssc-miR-181a	mature	known	templated	pig	ssc-miR-181a	ssc-mir-181a-2	MI0013106	NA	NA	NA	NA
AACATTCAACGCTGTCGGTGAGT	miRNA	ssc-miR-181a	mature	known	templated	pig	ssc-miR-181a	ssc-mir-181a-2	MI0013106	NA	NA	NA	NA
AACATTCATTGCTGTCGGTGGGT	miRNA	ssc-miR-181b	mature	known	templated	pig	ssc-miR-181b	ssc-mir-181b-2	MI0002420	NA	NA	NA	NA
AACATTCATTGTTGTCGGTGGGT	miRNA	ssc-miR-181d-5p	mature	known	templated	pig	ssc-miR-181d-5p	ssc-mir-181d	MI0013108	NA	NA	NA	NA
AACATTCATTGTTGTCGGTGGGTT	miRNA	ssc-miR-181d-5p	mature	known	templated	pig	ssc-miR-181d-5p	ssc-mir-181d	MI0013108	NA	NA	NA	NA
AACCCGTAGATCCGAACTTG	miRNA	ssc-miR-100	mature	known	templated	pig	ssc-miR-100	ssc-mir-100	MI0013128	NA	NA	NA	NA
AACCCGTAGATCCGAACTTGT	miRNA	ssc-miR-100	mature	known	templated	pig	ssc-miR-100	ssc-mir-100	MI0013128	NA	NA	NA	NA
AACCCGTAGATCCGAACTTGTG	miRNA	ssc-miR-100	mature	known	templated	pig	ssc-miR-100	ssc-mir-100	MI0013128	NA	NA	NA	NA
AACCCGTAGATCCGATCT	miRNA	ssc-miR-99a	mature	known	templated	pig	ssc-miR-99a	ssc-mir-99a	MI0013114	NA	NA	NA	NA
AACCCGTAGATCCGATCTT	miRNA	ssc-miR-99a	mature	known	templated	pig	ssc-miR-99a	ssc-mir-99a	MI0013114	NA	NA	NA	NA
AACCCGTAGATCCGATCTTG	miRNA	ssc-miR-99a	mature	known	templated	pig	ssc-miR-99a	ssc-mir-99a	MI0013114	NA	NA	NA	NA
AACCCGTAGATCCGATCTTGT	miRNA	ssc-miR-99a	mature	known	templated	pig	ssc-miR-99a	ssc-mir-99a	MI0013114	NA	NA	NA	NA
AACCCGTAGATCCGATCTTGTG	miRNA	ssc-miR-99a	mature	known	templated	pig	ssc-miR-99a	ssc-mir-99a	MI0013114	NA	NA	NA	NA
AACCCGTAGATCCGATCTTGTGG	miRNA	ssc-miR-99a	mature	known	templated	pig	ssc-miR-99a	ssc-mir-99a	MI0013114	NA	NA	NA	NA
AACGGAATCCCAAAAGC	miRNA	ssc-miR-191	mature	known	templated	pig	ssc-miR-191	ssc-mir-191	MI0013095	NA	NA	NA	NA
AACGGAATCCCAAAAGCAGC	miRNA	ssc-miR-191	mature	known	templated	pig	ssc-miR-191	ssc-mir-191	MI0013095	NA	NA	NA	NA
AACGGAATCCCAAAAGCAGCT	miRNA	ssc-miR-191	mature	known	templated	pig	ssc-miR-191	ssc-mir-191	MI0013095	NA	NA	NA	NA
AACGGAATCCCAAAAGCAGCTG	miRNA	ssc-miR-191	mature	known	templated	pig	ssc-miR-191	ssc-mir-191	MI0013095	NA	NA	NA	NA
AACGGAATCCCAAAAGCAGCTGT	miRNA	ssc-miR-191	mature	known	templated	pig	ssc-miR-191	ssc-mir-191	MI0013095	NA	NA	NA	NA
AACTGTGGGGGCACTTT	miRNA	ssc-miR-371-5p	mature	known	templated	pig	ssc-miR-371-5p	ssc-mir-371	MI0031640	NA	NA	NA	NM_019117.4;mRNA
AACTTATCAGACTGATGTTGAC	miRNA	hsa-mir-21	precursor	novel	templated	human	NA	NA		NA	NA	NA	ENST00000362134
AAGAAGTTGACTGAAG	miRNA	hsa-miR-3653-3p	mature	novel	templated	human	hsa-miR-3653-3p	hsa-mir-3653	MI0016053	NA	NA	NA	NA
AAGCTCATCAGACTGATGTTGAC	miRNA	hsa-mir-21	precursor	novel	templated	human	NA	NA		NA	NA	NA	ENST00000362134
AAGCTCGGTCTGAGGCCCCTC	miRNA	bta-miR-423-3p	mature	novel	templated	cattle	bta-miR-423-3p	ssc-mir-423	MI0013099	NA	NA	NA	ENST00000362201
AAGCTCGGTCTGAGGCCCCTCA	miRNA	bta-miR-423-3p	mature	novel	templated	cattle	bta-miR-423-3p	ssc-mir-423	MI0013099	NA	NA	NA	ENST00000362201
AAGCTCGGTCTGAGGCCCCTCAG	miRNA	ssc-miR-423-3p	mature	known	templated	pig	ssc-miR-423-3p	ssc-mir-423	MI0013099	NA	NA	NA	ENST00000362201
AAGCTCGGTCTGAGGCCCCTCAGT	miRNA	ssc-miR-423-3p	mature	known	templated	pig	ssc-miR-423-3p	ssc-mir-423	MI0013099	NA	NA	NA	ENST00000362201
AAGCTGCCAGTTGAAGAAC	miRNA	ssc-miR-22-3p	mature	known	templated	pig	ssc-miR-22-3p	ssc-mir-22	MI0014770	NA	NA	NA	ENST00000334146,gene_biotype:lincRNA,gene_symbol:MIR22HG
AAGCTGCCAGTTGAAGAACT	miRNA	ssc-miR-22-3p	mature	known	templated	pig	ssc-miR-22-3p	ssc-mir-22	MI0014770	NA	NA	NA	ENST00000334146,gene_biotype:lincRNA,gene_symbol:MIR22HG
AAGCTGCCAGTTGAAGAACTG	miRNA	ssc-miR-22-3p	mature	known	templated	pig	ssc-miR-22-3p	ssc-mir-22	MI0014770	NA	NA	NA	ENST00000334146,gene_biotype:lincRNA,gene_symbol:MIR22HG
AAGCTGCCAGTTGAAGAACTGT	miRNA	ssc-miR-22-3p	mature	known	templated	pig	ssc-miR-22-3p	ssc-mir-22	MI0014770	NA	NA	NA	ENST00000334146,gene_biotype:lincRNA,gene_symbol:MIR22HG
AAGCTGCCAGTTGAAGAACTGTT	miRNA	ssc-miR-22-3p	mature	known	templated	pig	ssc-miR-22-3p	ssc-mir-22	MI0014770	NA	NA	NA	ENST00000334146,gene_biotype:lincRNA,gene_symbol:MIR22HG
AAGCTGGGTTGAGAGGGCGAA	miRNA	ssc-miR-320	mature	known	templated	pig	ssc-miR-320	ssc-mir-320	MI0013097	NA	NA	NA	NA
AAGCTGGGTTGAGAGGGCGAAA	miRNA	ssc-miR-320	mature	known	templated	pig	ssc-miR-320	ssc-mir-320	MI0013097	NA	NA	NA	NA
AAGCTTACCAGACTGATGTTGAC	miRNA	hsa-mir-21	precursor	novel	templated	human	NA	NA		NA	NA	NA	ENST00000362134
AAGCTTATCAGACCGATGTTGAC	miRNA	hsa-mir-21	precursor	novel	templated	human	NA	NA		NA	NA	NA	ENST00000362134
AAGCTTATCAGACTGACGTTGAC	miRNA	hsa-mir-21	precursor	novel	templated	human	NA	NA		NA	NA	NA	ENST00000362134
AAGCTTATCAGACTGATG	miRNA	hsa-mir-21	precursor	novel	templated	human	NA	NA		NA	NA	NA	ENST00000362134
AAGCTTATCAGACTGATGCTGAC	miRNA	hsa-mir-21	precursor	novel	templated	human	NA	NA		NA	NA	NA	ENST00000362134
AAGCTTATCAGACTGATGT	miRNA	hsa-mir-21	precursor	novel	templated	human	NA	NA		NA	NA	NA	ENST00000362134
AAGCTTATCAGACTGATGTT	miRNA	hsa-mir-21	precursor	novel	templated	human	NA	NA		NA	NA	NA	ENST00000362134
AAGCTTATCAGACTGATGTTA	miRNA	hsa-mir-21	precursor	novel	templated	human	NA	NA		NA	NA	NA	ENST00000362134
AAGCTTATCAGACTGATGTTG	miRNA	hsa-mir-21	precursor	novel	templated	human	NA	NA		NA	NA	NA	ENST00000362134
AAGCTTATCAGACTGATGTTGA	miRNA	hsa-mir-21	precursor	novel	templated	human	NA	NA		NA	NA	NA	ENST00000362134
AAGCTTATCAGACTGATGTTGAA	miRNA	hsa-mir-21	precursor	novel	templated	human	NA	NA		NA	NA	NA	ENST00000362134
AAGCTTATCAGACTGATGTTGAC	miRNA	hsa-mir-21	precursor	novel	templated	human	NA	NA		NA	NA	NA	ENST00000362134
AAGCTTATCAGACTGATGTTGACA	miRNA	hsa-mir-21	precursor	novel	templated	human	NA	NA		NA	NA	NA	ENST00000362134
AAGCTTATCAGACTGATGTTGACC	miRNA	hsa-mir-21	precursor	novel	templated	human	NA	NA		NA	NA	NA	ENST00000362134
AAGCTTATCAGACTGATGTTGACG	miRNA	hsa-mir-21	precursor	novel	templated	human	NA	NA		NA	NA	NA	ENST00000362134
AAGCTTATCAGACTGATGTTGACT	miRNA	hsa-mir-21	precursor	novel	templated	human	NA	NA		NA	NA	NA	ENST00000362134
AAGCTTATCAGACTGATGTTGAT	miRNA	hsa-mir-21	precursor	novel	templated	human	NA	NA		NA	NA	NA	ENST00000362134
AAGCTTATCAGACTGATGTTGG	miRNA	hsa-mir-21	precursor	novel	templated	human	NA	NA		NA	NA	NA	ENST00000362134
AAGCTTATCAGACTGGTGTTGAC	miRNA	hsa-mir-21	precursor	novel	templated	human	NA	NA		NA	NA	NA	ENST00000362134
AAGCTTATCAGGCTGATGTTGAC	miRNA	hsa-mir-21	precursor	novel	templated	human	NA	NA		NA	NA	NA	ENST00000362134
AAGCTTATCGGACTGATGTTGAC	miRNA	hsa-mir-21	precursor	novel	templated	human	NA	NA		NA	NA	NA	ENST00000362134
AAGCTTGTCAGACTGATGTTGAC	miRNA	hsa-mir-21	precursor	novel	templated	human	NA	NA		NA	NA	NA	ENST00000362134
AAGGAGCTCACAGTCTATTG	miRNA	ssc-miR-28-5p	mature	known	templated	pig	ssc-miR-28-5p	ssc-mir-28	MI0002430	NA	NA	NA	NA
AAGGAGCTCACAGTCTATTGA	miRNA	ssc-miR-28-5p	mature	known	templated	pig	ssc-miR-28-5p	ssc-mir-28	MI0002430	NA	NA	NA	NA
AAGGAGCTCACAGTCTATTGAG	miRNA	ssc-miR-28-5p	mature	known	templated	pig	ssc-miR-28-5p	ssc-mir-28	MI0002430	NA	NA	NA	NA
AAGGTGCATCTAGTGCAGATAG	miRNA	ssc-miR-18a	mature	known	templated	pig	ssc-miR-18a	ssc-mir-18a	MI0002455	NA	NA	NA	ENST00000362310,gene_biotype:processed_transcript,gene_symbol:MIR17HG
AAGTGCTTCCATGTTTC	miRNA	bta-miR-302c	mature	novel	templated	cattle	bta-miR-302c	ENSSSCG00000019558		NA	NA	NA	NA
AAGTGCTTCCATGTTTCAGT	miRNA	bta-miR-302c	mature	novel	templated	cattle	bta-miR-302c	ENSSSCG00000019558		NA	NA	NA	NA
AAGTGCTTCCATGTTTCAGTG	miRNA	bta-miR-302c	mature	novel	templated	cattle	bta-miR-302c	ENSSSCG00000019558		NA	NA	NA	NA
AAGTGCTTCCATGTTTCAGTGG	miRNA	bta-miR-302c	mature	novel	templated	cattle	bta-miR-302c	ENSSSCG00000019558		NA	NA	NA	NA
AAGTGCTTCCATGTTTCAGTGGA	miRNA	bta-miR-302c	mature	novel	templated	cattle	bta-miR-302c	ENSSSCG00000019558		NA	NA	NA	NA
AAGTGCTTCCATGTTTT	miRNA	bta-miR-302d	mature	novel	templated	cattle	bta-miR-302d	bta-mir-302d	MI0009792	NA	NA	NA	ENST00000362188,gene_biotype:antisense,gene_symbol:MIR302B
AAGTGCTTCCATGTTTTAG	miRNA	bta-miR-302d	mature	novel	templated	cattle	bta-miR-302d	ENSSSCG00000018952		NA	NA	NA	ENST00000362188,gene_biotype:antisense,gene_symbol:MIR302B
AAGTGCTTCCATGTTTTAGT	miRNA	bta-miR-302d	mature	novel	templated	cattle	bta-miR-302d	ENSSSCG00000018952		NA	NA	NA	ENST00000362188,gene_biotype:antisense,gene_symbol:MIR302B
AAGTGCTTCCATGTTTTAGTA	miRNA	bta-miR-302b	mature	novel	templated	cattle	bta-miR-302b	ENSSSCG00000018952		NA	NA	NA	ENST00000362188,gene_biotype:antisense,gene_symbol:MIR302B
AAGTGCTTCCATGTTTTAGTAG	miRNA	bta-miR-302b	mature	novel	templated	cattle	bta-miR-302b	ENSSSCG00000018952		NA	NA	NA	ENST00000362188,gene_biotype:antisense,gene_symbol:MIR302B
AAGTGCTTCCATGTTTTAGTAGA	miRNA	bta-miR-302b	mature	novel	templated	cattle	bta-miR-302b	ENSSSCG00000018952		NA	NA	NA	ENST00000362188,gene_biotype:antisense,gene_symbol:MIR302B
AAGTGCTTCCATGTTTTAGTAGG	miRNA	bta-miR-302b	mature	novel	templated	cattle	bta-miR-302b	hsa-mir-302b	MI0000772	NA	NA	NA	ENST00000362188,gene_biotype:antisense,gene_symbol:MIR302B
AAGTGCTTCCATGTTTTAGTG	miRNA	bta-miR-302a	mature	novel	templated	cattle	bta-miR-302a	bta-mir-302d	MI0009792	NA	NA	NA	ENST00000362188,gene_biotype:antisense,gene_symbol:MIR302B
AAGTGCTTCCATGTTTTAGTGA	miRNA	bta-miR-302a	mature	novel	templated	cattle	bta-miR-302a	bta-mir-302a	MI0009791	NA	NA	NA	ENST00000362188,gene_biotype:antisense,gene_symbol:MIR302B
AAGTGCTTCCATGTTTTAGTGC	miRNA	bta-miR-302a	mature	novel	templated	cattle	bta-miR-302a	bta-mir-302d	MI0009792	NA	NA	NA	ENST00000362188,gene_biotype:antisense,gene_symbol:MIR302B
AAGTTCTGAGACACTCCGACT	miRNA	ssc-miR-148a-5p	mature	known	templated	pig	ssc-miR-148a-5p	ssc-mir-148a	MI0002418	NA	NA	NA	NA
AATACTGCCGGGTAATGAT	miRNA	bta-miR-200c	mature	novel	templated	cattle	bta-miR-200c	bta-mir-200c	MI0005038	NA	NA	NA	NA
AATACTGCCGGGTAATGATG	miRNA	bta-miR-200c	mature	novel	templated	cattle	bta-miR-200c	bta-mir-200c	MI0005038	NA	NA	NA	NA
AATACTGCCGGGTAATGATGG	miRNA	bta-miR-200c	mature	novel	templated	cattle	bta-miR-200c	bta-mir-200c	MI0005038	NA	NA	NA	NA
AATACTGCCGGGTAATGATGGA	miRNA	bta-miR-200c	mature	novel	templated	cattle	bta-miR-200c	bta-mir-200c	MI0005038	NA	NA	NA	NA
AATACTGCCTGGTAATGATG	miRNA	bta-miR-200b	mature	novel	templated	cattle	bta-miR-200b	ENSSSCG00000024128		NA	NA	NA	NA
AATACTGCCTGGTAATGATGA	miRNA	bta-miR-200b	mature	novel	templated	cattle	bta-miR-200b	ENSSSCG00000024128		NA	NA	NA	NA
AATACTGCCTGGTAATGATGAC	miRNA	hsa-miR-200b-3p	mature	novel	templated	human	hsa-miR-200b-3p	hsa-mir-200b	MI0000342	NA	NA	NA	NA
AATACTGTCTGGTAATGCCG	miRNA	ssc-miR-429	mature	known	templated	pig	ssc-miR-429	ssc-mir-429	MI0017991	NA	NA	NA	NA
AATACTGTCTGGTAATGCCGT	miRNA	ssc-miR-429	mature	known	templated	pig	ssc-miR-429	ssc-mir-429	MI0017991	NA	NA	NA	NA
AATAGCCACTGTACTCCAGCCTGGGCAACATAGCGAGACCCCGTC	miRNA	ssc-miR-1285	mature	known	templated	pig	ssc-miR-1285	ssc-mir-1285	MI0013164	NA	NA	NA	ENST00000618786,gene_biotype:misc_RNA,gene_symbol:RN7SL1
AATAGCCACTGTACTCCAGCCTGGGCAACATAGCGAGACCCCGTCT	miRNA	ssc-miR-1285	mature	known	templated	pig	ssc-miR-1285	ssc-mir-1285	MI0013164	NA	NA	NA	ENST00000618786,gene_biotype:misc_RNA,gene_symbol:RN7SL1
AATAGCCACTGTACTCCAGCCTGGGCAACATAGCGAGACCCCGTCTCT	miRNA	ssc-miR-1285	mature	known	templated	pig	ssc-miR-1285	ssc-mir-1285	MI0013164	NA	NA	NA	ENST00000618786,gene_biotype:misc_RNA,gene_symbol:RN7SL1
AATAGCCACTGTACTCCAGCCTGGGCAACATAGCGAGACCCCGTCTCTT	miRNA	ssc-miR-1285	mature	known	templated	pig	ssc-miR-1285	ssc-mir-1285	MI0013164	NA	NA	NA	ENST00000626159
AATAGCCACTGTACTCCAGCCTGGGCAACATAGCGAGACCCCGTCTCTTT	miRNA	ssc-miR-1285	mature	known	templated	pig	ssc-miR-1285	ssc-mir-1285	MI0013164	NA	NA	NA	ENST00000626159
AATCACTAACCACACGGCCAG	miRNA	hsa-miR-34c-3p	mature	novel	templated	human	hsa-miR-34c-3p	ssc-mir-34c-2	MI0022128	NA	NA	NA	NA
AATCACTAACCACACGGCCAGG	miRNA	hsa-miR-34c-3p	mature	novel	templated	human	hsa-miR-34c-3p	ssc-mir-34c-2	MI0022128	NA	NA	NA	NA
AATCAGACTGATGTTGAC	miRNA	hsa-mir-21	precursor	novel	templated	human	NA	NA		NA	NA	NA	ENST00000362134
AATCCTTGGAACCTAGGTGTGAGT	miRNA	ssc-miR-362	mature	known	templated	pig	ssc-miR-362	ssc-mir-362	MI0015913	NA	NA	NA	NA
AATCCTTGGAACCTAGGTGTGAGTG	miRNA	ssc-miR-362	mature	known	templated	pig	ssc-miR-362	ssc-mir-362	MI0015913	NA	NA	NA	NA
AATCCTTGGAACCTAGGTGTGAGTGC	miRNA	ssc-miR-362	mature	known	templated	pig	ssc-miR-362	ssc-mir-362	MI0015913	NA	NA	NA	NA
AATGACACGATCACTCCCGTTG	miRNA	ssc-miR-425-5p	mature	known	templated	pig	ssc-miR-425-5p	ssc-mir-425	MI0013133	NA	NA	NA	NA
AATGACACGATCACTCCCGTTGA	miRNA	ssc-miR-425-5p	mature	known	templated	pig	ssc-miR-425-5p	ssc-mir-425	MI0013133	NA	NA	NA	NA
AATGACACGATCACTCCCGTTGAG	miRNA	ssc-miR-425-5p	mature	known	templated	pig	ssc-miR-425-5p	ssc-mir-425	MI0013133	NA	NA	NA	NA
AATGACACGATCACTCCCGTTGAGT	miRNA	ssc-miR-425-5p	mature	known	templated	pig	ssc-miR-425-5p	ssc-mir-425	MI0013133	NA	NA	NA	NA
AATGCCCCTAAAAATCCTTAT	miRNA	ssc-miR-365-3p	mature	known	templated	pig	ssc-miR-365-3p	ssc-mir-365-2	MI0013120	NA	NA	NA	ENST00000362317,gene_biotype:lincRNA,gene_symbol:MIR365B
AATGGATTTTTGGAG	miRNA	bta-miR-1246	mature	novel	templated	cattle	bta-miR-1246	bta-mir-1246	MI0021112	NA	NA	NA	NA
AATGGATTTTTGGAGC	miRNA	bta-miR-1246	mature	novel	templated	cattle	bta-miR-1246	bta-mir-1246	MI0021112	NA	NA	NA	NA
AATGGCGCCACTAGGGTTGTG	miRNA	bta-miR-652	mature	novel	templated	cattle	bta-miR-652	ssc-mir-652	MI0015919	NA	NA	NA	NA
AATTGCACGGTATCCATCTGTA	miRNA	ssc-miR-363	mature	known	templated	pig	ssc-miR-363	ssc-mir-363-2	MI0022147	NA	NA	NA	ENST00000384840,gene_biotype:processed_transcript,gene_symbol:MIR92A2
AATTGCACTTTAGCAATGGTG	miRNA	bta-miR-367	mature	novel	templated	cattle	bta-miR-367	ENSSSCG00000018444		NA	NA	NA	NA
ACACTGTCTGGTAACGATGTT	miRNA	bta-miR-200a	mature	novel	templated	cattle	bta-miR-200a	bta-mir-200a	MI0005037	NA	NA	NA	NA
ACAGATTCGATTCTAGGGGAAT	miRNA	hsa-miR-10b-3p	mature	novel	templated	human	hsa-miR-10b-3p	ssc-mir-10b	MI0013102	NA	NA	NA	NA
ACAGTACTGTGATAACTGA	miRNA	ssc-miR-101	mature	known	templated	pig	ssc-miR-101	ssc-mir-101-2	MI0010679	NA	NA	NA	NA
ACAGTACTGTGATAACTGAA	miRNA	ssc-miR-101	mature	known	templated	pig	ssc-miR-101	ssc-mir-101-2	MI0010679	NA	NA	NA	NA
ACAGTACTGTGATAACTGAAG	miRNA	ssc-miR-101	mature	known	templated	pig	ssc-miR-101	ssc-mir-101-2	MI0010679	NA	NA	NA	NA
ACATGCCTTGAGTGTAGGACCGT	miRNA	ssc-miR-532-5p	mature	known	templated	pig	ssc-miR-532-5p	ssc-mir-532	MI0013150	NA	NA	NA	NA
ACATTCAACGCTGTCGGTGAGT	miRNA	ssc-miR-181a	mature	known	templated	pig	ssc-miR-181a	ssc-mir-181a-2	MI0013106	NA	NA	NA	NA
ACCACAGGGTAGAACC	miRNA	ssc-miR-140-3p	mature	known	templated	pig	ssc-miR-140-3p	ssc-mir-140	MI0002437	NA	NA	NA	NA
ACCACAGGGTAGAACCACGG	miRNA	ssc-miR-140-3p	mature	known	templated	pig	ssc-miR-140-3p	ssc-mir-140	MI0002437	NA	NA	NA	NA
ACCACAGGGTAGAACCACGGA	miRNA	ssc-miR-140-3p	mature	known	templated	pig	ssc-miR-140-3p	ssc-mir-140	MI0002437	NA	NA	NA	NA
ACCACAGGGTAGAACCACGGAC	miRNA	ssc-miR-140-3p	mature	known	templated	pig	ssc-miR-140-3p	ssc-mir-140	MI0002437	NA	NA	NA	NA
ACCACAGGGTAGAACCACGGACA	miRNA	ssc-miR-140-3p	mature	known	templated	pig	ssc-miR-140-3p	ssc-mir-140	MI0002437	NA	NA	NA	NA
ACCCGTAGAACCGACCTTGC	miRNA	ssc-miR-99b	mature	known	templated	pig	ssc-miR-99b	ssc-mir-99b	MI0007077	NA	NA	NA	NA
ACCCGTAGAACCGACCTTGCG	miRNA	ssc-miR-99b	mature	known	templated	pig	ssc-miR-99b	ssc-mir-99b	MI0007077	NA	NA	NA	NA
ACCCGTAGATCCGATCTTG	miRNA	ssc-miR-99a	mature	known	templated	pig	ssc-miR-99a	ssc-mir-99a	MI0013114	NA	NA	NA	NA
ACCCGTAGATCCGATCTTGT	miRNA	ssc-miR-99a	mature	known	templated	pig	ssc-miR-99a	ssc-mir-99a	MI0013114	NA	NA	NA	NA
ACCCGTAGATCCGATCTTGTG	miRNA	ssc-miR-99a	mature	known	templated	pig	ssc-miR-99a	ssc-mir-99a	MI0013114	NA	NA	NA	NA
ACCCTGTAGAACCGAATT	miRNA	ssc-miR-10b	mature	known	templated	pig	ssc-miR-10b	ssc-mir-10b	MI0013102	NA	NA	NA	NA
ACCCTGTAGAACCGAATTTG	miRNA	ssc-miR-10b	mature	known	templated	pig	ssc-miR-10b	ssc-mir-10b	MI0013102	NA	NA	NA	NA
ACCCTGTAGAACCGAATTTGT	miRNA	ssc-miR-10b	mature	known	templated	pig	ssc-miR-10b	ssc-mir-10b	MI0013102	NA	NA	NA	ENST00000385043,gene_biotype:sense_intronic,gene_symbol:MIR10A
ACCCTGTAGAACCGAATTTGTG	miRNA	ssc-miR-10b	mature	known	templated	pig	ssc-miR-10b	ssc-mir-10b	MI0013102	NA	NA	NA	ENST00000385043,gene_biotype:sense_intronic,gene_symbol:MIR10A
ACCCTGTAGAACCGAATTTGTGT	miRNA	bta-miR-10b	mature	novel	templated	cattle	bta-miR-10b	ssc-mir-10b	MI0013102	NA	NA	NA	ENST00000385043,gene_biotype:sense_intronic,gene_symbol:MIR10A
ACCCTGTAGATCCGAAT	miRNA	ssc-miR-10a-5p	mature	known	templated	pig	ssc-miR-10a-5p	ssc-mir-10a	MI0013101	NA	NA	NA	ENST00000385043,gene_biotype:sense_intronic,gene_symbol:MIR10A
ACCCTGTAGATCCGAATT	miRNA	ssc-miR-10a-5p	mature	known	templated	pig	ssc-miR-10a-5p	ssc-mir-10a	MI0013101	NA	NA	NA	ENST00000385043,gene_biotype:sense_intronic,gene_symbol:MIR10A
ACCCTGTAGATCCGAATTT	miRNA	ssc-miR-10a-5p	mature	known	templated	pig	ssc-miR-10a-5p	ssc-mir-10a	MI0013101	NA	NA	NA	ENST00000385043,gene_biotype:sense_intronic,gene_symbol:MIR10A
ACCCTGTAGATCCGAATTTG	miRNA	ssc-miR-10a-5p	mature	known	templated	pig	ssc-miR-10a-5p	ssc-mir-10a	MI0013101	NA	NA	NA	ENST00000385043,gene_biotype:sense_intronic,gene_symbol:MIR10A
ACCCTGTAGATCCGAATTTGT	miRNA	ssc-miR-10a-5p	mature	known	templated	pig	ssc-miR-10a-5p	ssc-mir-10a	MI0013101	NA	NA	NA	ENST00000385043,gene_biotype:sense_intronic,gene_symbol:MIR10A
ACCCTGTAGATCCGAATTTGTG	miRNA	ssc-miR-10a-5p	mature	known	templated	pig	ssc-miR-10a-5p	ssc-mir-10a	MI0013101	NA	NA	NA	ENST00000385043,gene_biotype:sense_intronic,gene_symbol:MIR10A
ACCCTGTAGATCCGAATTTGTGT	miRNA	bta-miR-10a	mature	novel	templated	cattle	bta-miR-10a	ssc-mir-10a	MI0013101	NA	NA	NA	ENST00000385043,gene_biotype:sense_intronic,gene_symbol:MIR10A
ACCTTCTTGTATAAGCACTGTGC	miRNA	bta-miR-1248	mature	novel	templated	cattle	bta-miR-1248	bta-mir-1248-2	MI0010483	NA	NA	NA	ENST00000408493,gene_biotype:snoRNA,gene_symbol:SNORA81
ACCTTCTTGTATAAGCACTGTGCT	miRNA	bta-miR-1248	mature	novel	templated	cattle	bta-miR-1248	bta-mir-1248-2	MI0010483	NA	NA	NA	ENST00000408493,gene_biotype:snoRNA,gene_symbol:SNORA81
ACGCCCTTCCCCCCCTTCTTC	miRNA	ssc-miR-1249	mature	known	templated	pig	ssc-miR-1249	ssc-mir-1249-1	MI0022158	NA	NA	NA	NA
ACGCCCTTCCCCCCCTTCTTCA	miRNA	ssc-miR-1249	mature	known	templated	pig	ssc-miR-1249	ssc-mir-1249-1	MI0022158	NA	NA	NA	NA
ACGCTTATCAGACTGATGTTGAC	miRNA	hsa-mir-21	precursor	novel	templated	human	NA	NA		NA	NA	NA	ENST00000362134
ACGGAATCCCAAAAGCAGCTG	miRNA	ssc-miR-191	mature	known	templated	pig	ssc-miR-191	ssc-mir-191	MI0013095	NA	NA	NA	NA
ACGTTGGCTCTGGTGGTGATG	miRNA	ssc-miR-1306-3p	mature	known	templated	pig	ssc-miR-1306-3p	ssc-mir-1306	MI0013148	NM_001206919.1;mRNA	NA	NA	ENST00000408439
ACTACAGAACTTTGT	miRNA	ssc-miR-148a-3p	mature	known	templated	pig	ssc-miR-148a-3p	ssc-mir-148a	MI0002418	NA	NA	NA	NA
ACTAGACTGAAGCTCCTTGAG	miRNA	bta-miR-151-3p	mature	novel	templated	cattle	bta-miR-151-3p	ssc-mir-151	MI0013100	NA	NA	NA	NA
ACTAGACTGAAGCTCCTTGAGG	miRNA	ssc-miR-151-3p	mature	known	templated	pig	ssc-miR-151-3p	ssc-mir-151	MI0013100	NA	NA	NA	NA
ACTAGATTGTGAGCTCCTGG	miRNA	ssc-miR-28-3p	mature	known	templated	pig	ssc-miR-28-3p	ssc-mir-28	MI0002430	NA	NA	NA	NM_005373.2;mRNA
ACTAGATTGTGAGCTCCTGGA	miRNA	ssc-miR-28-3p	mature	known	templated	pig	ssc-miR-28-3p	ssc-mir-28	MI0002430	NA	NA	NA	NA
ACTAGATTGTGAGCTCCTGGAG	miRNA	ssc-miR-28-3p	mature	known	templated	pig	ssc-miR-28-3p	ssc-mir-28	MI0002430	NA	NA	NA	NA
ACTCAAACTGTGGGG	miRNA	ssc-miR-371-5p	mature	known	templated	pig	ssc-miR-371-5p	ssc-mir-371	MI0031640	NA	NA	NA	NA
ACTCAAACTGTGGGGG	miRNA	ssc-miR-371-5p	mature	known	templated	pig	ssc-miR-371-5p	ssc-mir-371	MI0031640	NA	NA	NA	NA
ACTCAAACTGTGGGGGC	miRNA	ssc-miR-371-5p	mature	known	templated	pig	ssc-miR-371-5p	ssc-mir-371	MI0031640	NA	NA	NA	NA
ACTCAAACTGTGGGGGCA	miRNA	ssc-miR-371-5p	mature	known	templated	pig	ssc-miR-371-5p	ssc-mir-371	MI0031640	NA	NA	NA	NA
ACTCAAACTGTGGGGGCAC	miRNA	ssc-miR-371-5p	mature	known	templated	pig	ssc-miR-371-5p	ssc-mir-371	MI0031640	NA	NA	NA	NA
ACTCAAACTGTGGGGGCACT	miRNA	ssc-miR-371-5p	mature	known	templated	pig	ssc-miR-371-5p	ssc-mir-371	MI0031640	NA	NA	NA	NA
ACTCAAACTGTGGGGGCACTT	miRNA	ssc-miR-371-5p	mature	known	templated	pig	ssc-miR-371-5p	ssc-mir-371	MI0031640	NA	NA	NA	NA
ACTCAAACTGTGGGGGCACTTC	miRNA	ssc-miR-371-5p	mature	known	templated	pig	ssc-miR-371-5p	bta-mir-371	MI0009815	NA	NA	NA	NA
ACTCAAACTGTGGGGGCACTTCC	miRNA	ssc-miR-371-5p	mature	known	templated	pig	ssc-miR-371-5p	bta-mir-371	MI0009815	NA	NA	NA	NA
ACTCAAACTGTGGGGGCACTTT	miRNA	ssc-miR-371-5p	mature	known	templated	pig	ssc-miR-371-5p	ssc-mir-371	MI0031640	NA	NA	NA	NA
ACTCAAACTGTGGGGGCACTTTC	miRNA	ssc-miR-371-5p	mature	known	templated	pig	ssc-miR-371-5p	ssc-mir-371	MI0031640	NA	NA	NA	NA
ACTCAAACTGTGGGGGCACTTTCT	miRNA	ssc-miR-371-5p	mature	known	templated	pig	ssc-miR-371-5p	ssc-mir-371	MI0031640	NA	NA	NA	NA
ACTCCAGCCTGGGCAACATAGCGAGACCCCGTCTCTT	miRNA	ssc-miR-1285	mature	known	templated	pig	ssc-miR-1285	ssc-mir-1285	MI0013164	NA	NA	NA	ENST00000626159
ACTCGGCGTGGCGTCGGTCG	miRNA	ssc-miR-1307	mature	known	templated	pig	ssc-miR-1307	ssc-mir-1307	MI0013147	NA	NA	NA	ENST00000408840
ACTCGGCGTGGCGTCGGTCGT	miRNA	ssc-miR-1307	mature	known	templated	pig	ssc-miR-1307	ssc-mir-1307	MI0013147	NA	NA	NA	ENST00000408840
ACTCGGCGTGGCGTCGGTCGTG	miRNA	ssc-miR-1307	mature	known	templated	pig	ssc-miR-1307	ssc-mir-1307	MI0013147	NA	NA	NA	ENST00000408840
ACTCGGCGTGGCGTCGGTCGTGG	miRNA	ssc-miR-1307	mature	known	templated	pig	ssc-miR-1307	ssc-mir-1307	MI0013147	NA	NA	NA	ENST00000408840
ACTCGGCGTGGCGTCGGTCGTGGT	miRNA	ssc-miR-1307	mature	known	templated	pig	ssc-miR-1307	ssc-mir-1307	MI0013147	NA	NA	NA	ENST00000408840
ACTCTTTCCCTGTTGCACTAC	miRNA	hsa-miR-130b-5p	mature	novel	templated	human	hsa-miR-130b-5p	ssc-mir-130b	MI0013136	NA	NA	NA	ENST00000385018,gene_biotype:processed_transcript,gene_symbol:MIR130B
ACTCTTTCCCTGTTGCACTACT	miRNA	hsa-miR-130b-5p	mature	novel	templated	human	hsa-miR-130b-5p	ssc-mir-130b	MI0013136	NA	NA	NA	ENST00000385018,gene_biotype:processed_transcript,gene_symbol:MIR130B
ACTGCCCTAAGTGCTCCTTCTG	miRNA	hsa-miR-18a-3p	mature	novel	templated	human	hsa-miR-18a-3p	ssc-mir-18a	MI0002455	NA	NA	NA	ENST00000362310,gene_biotype:processed_transcript,gene_symbol:MIR17HG
ACTGCCCTAAGTGCTCCTTCTGG	miRNA	hsa-miR-18a-3p	mature	novel	templated	human	hsa-miR-18a-3p	ssc-mir-18a	MI0002455	NA	NA	NA	ENST00000362310,gene_biotype:processed_transcript,gene_symbol:MIR17HG
ACTGCCGGGTAATGATGGA	miRNA	bta-miR-200c	mature	novel	templated	cattle	bta-miR-200c	bta-mir-200c	MI0005038	NA	NA	NA	NA
ACTGCCTGGTAATGATGAC	miRNA	hsa-miR-200b-3p	mature	novel	templated	human	hsa-miR-200b-3p	hsa-mir-200b	MI0000342	NA	NA	NA	NA
ACTGGACTCGGAGTCAGAAGG	miRNA	hsa-mir-378i	precursor	novel	templated	human	NA	NA		NA	NA	NA	ENST00000582688
ACTGGACTCGGAGTCAGAAGGT	miRNA	hsa-mir-378i	precursor	novel	templated	human	NA	NA		NA	NA	NA	ENST00000582688
ACTGGACTTGGAGTC	miRNA	ssc-miR-378b-3p	mature	known	templated	pig	ssc-miR-378b-3p	hsa-mir-378e	MI0016750	NA	NA	NA	NA
ACTGGACTTGGAGTCA	miRNA	ssc-miR-378b-3p	mature	known	templated	pig	ssc-miR-378b-3p	hsa-mir-378e	MI0016750	NA	NA	NA	NA
ACTGGACTTGGAGTCAG	miRNA	ssc-miR-378b-3p	mature	known	templated	pig	ssc-miR-378b-3p	hsa-mir-378e	MI0016750	NA	NA	NA	ENST00000580636,gene_biotype:lincRNA,gene_symbol:MIR378D2
ACTGGACTTGGAGTCAGA	miRNA	ssc-miR-378b-3p	mature	known	templated	pig	ssc-miR-378b-3p	bta-mir-378c	MI0022299	NA	NA	NA	ENST00000580636,gene_biotype:lincRNA,gene_symbol:MIR378D2
ACTGGACTTGGAGTCAGAA	miRNA	ssc-miR-378b-3p	mature	known	templated	pig	ssc-miR-378b-3p	bta-mir-378c	MI0022299	NA	NA	NA	ENST00000580636,gene_biotype:lincRNA,gene_symbol:MIR378D2
ACTGGACTTGGAGTCAGAAG	miRNA	ssc-miR-378b-3p	mature	known	templated	pig	ssc-miR-378b-3p	bta-mir-378c	MI0022299	NA	NA	NA	ENST00000612936
ACTGGACTTGGAGTCAGAAGA	miRNA	ssc-miR-378b-3p	mature	known	templated	pig	ssc-miR-378b-3p	ENSSSCG00000028003		NA	NA	NA	ENST00000612936
ACTGGACTTGGAGTCAGAAGAC	miRNA	ssc-miR-378b-3p	mature	known	templated	pig	ssc-miR-378b-3p	ENSSSCG00000028003		NA	NA	NA	ENST00000612936
ACTGGACTTGGAGTCAGAAGG	miRNA	ssc-miR-378	mature	known	templated	pig	ssc-miR-378	ssc-mir-378-2	MI0016622	NA	NA	NA	ENST00000612936
ACTGGACTTGGAGTCAGAAGGC	miRNA	ssc-miR-378	mature	known	templated	pig	ssc-miR-378	ssc-mir-378-2	MI0016622	NA	NA	NA	ENST00000612936
ACTGGACTTGGAGTCAGAAGGCC	miRNA	ssc-miR-378	mature	known	templated	pig	ssc-miR-378	ssc-mir-378-2	MI0016622	NA	NA	NA	NA
ACTGGACTTGGAGTCAGAAGGCT	miRNA	ssc-miR-378	mature	known	templated	pig	ssc-miR-378	bta-mir-378-2	MI0013052	NA	NA	NA	NA
ACTGGACTTGGAGTCAGAAGT	miRNA	ssc-miR-378b-3p	mature	known	templated	pig	ssc-miR-378b-3p	ssc-mir-378b	MI0031641	NA	NA	NA	ENST00000612936
ACTGTAAACGCTTTCTGATG	miRNA	hsa-miR-3607-3p	mature	novel	templated	human	hsa-miR-3607-3p	hsa-mir-3607	MI0015997	NA	NA	NA	NA
ACTGTAAACGCTTTCTGATGTA	miRNA	hsa-miR-3607-3p	mature	novel	templated	human	hsa-miR-3607-3p	hsa-mir-3607	MI0015997	NA	NA	NA	NA
ACTGTACTCCAGCCTGGGCAACATAGCGAGACCCCGTCTCT	miRNA	ssc-miR-1285	mature	known	templated	pig	ssc-miR-1285	ssc-mir-1285	MI0013164	NA	NA	NA	ENST00000618786,gene_biotype:misc_RNA,gene_symbol:RN7SL1
ACTGTACTCCAGCCTGGGCAACATAGCGAGACCCCGTCTCTT	miRNA	ssc-miR-1285	mature	known	templated	pig	ssc-miR-1285	ssc-mir-1285	MI0013164	NA	NA	NA	ENST00000626159
ACTGTACTCCAGCCTGGGCAACATAGCGAGACCCCGTCTCTTT	miRNA	ssc-miR-1285	mature	known	templated	pig	ssc-miR-1285	ssc-mir-1285	MI0013164	NA	NA	NA	ENST00000626159
ACTGTCTGGTAACGATGTT	miRNA	bta-miR-200a	mature	novel	templated	cattle	bta-miR-200a	bta-mir-200a	MI0005037	NA	NA	NA	NA
ACTTAAACGTGGATGTACT	miRNA	hsa-miR-302a-5p	mature	novel	templated	human	hsa-miR-302a-5p	bta-mir-302a	MI0009791	NA	NA	NA	NA
ACTTAAACGTGGATGTACTTG	miRNA	hsa-miR-302a-5p	mature	novel	templated	human	hsa-miR-302a-5p	bta-mir-302a	MI0009791	NA	NA	NA	NA
ACTTAAACGTGGATGTACTTGC	miRNA	hsa-miR-302a-5p	mature	novel	templated	human	hsa-miR-302a-5p	bta-mir-302a	MI0009791	NA	NA	NA	NA
ACTTAAACGTGGATGTACTTGCT	miRNA	hsa-miR-302a-5p	mature	novel	templated	human	hsa-miR-302a-5p	bta-mir-302a	MI0009791	NA	NA	NA	NA
ACTTAAACGTGGATGTACTTGCTT	miRNA	hsa-miR-302a-5p	mature	novel	templated	human	hsa-miR-302a-5p	bta-mir-302a	MI0009791	NA	NA	NA	NA
ACTTGTCCCGGCCTGT	miRNA	ssc-miR-92a	mature	known	templated	pig	ssc-miR-92a	ssc-mir-92a-2	MI0013124	NA	NA	NA	NA
AGAAGTTGACTGAAG	miRNA	hsa-miR-3653-3p	mature	novel	templated	human	hsa-miR-3653-3p	hsa-mir-3653	MI0016053	NA	NA	NA	NA
AGACTGATGTTGACT	miRNA	bta-miR-21-5p	mature	novel	templated	cattle	bta-miR-21-5p	ssc-mir-21	MI0002459	NA	NA	NA	NA
AGAGATCAGAGGCGCAGAGT	miRNA	bta-miR-6529a	mature	novel	templated	cattle	bta-miR-6529a	bta-mir-6529a	MI0022328	NA	NA	NA	ENST00000613558
AGAGGGGCAGAGAGCGAGACT	miRNA	hsa-mir-423	precursor	novel	templated	human	NA	NA		NA	NA	NA	ENST00000362201
AGAGGGGCAGAGAGCGAGACTT	miRNA	hsa-mir-423	precursor	novel	templated	human	NA	NA		NA	NA	NA	ENST00000362201
AGAGGGGCAGAGAGCGAGACTTC	miRNA	hsa-mir-423	precursor	novel	templated	human	NA	NA		NA	NA	NA	ENST00000362201
AGAGGGGCAGAGAGCGAGACTTT	miRNA	hsa-mir-423	precursor	novel	templated	human	NA	NA		NA	NA	NA	ENST00000362201
AGAGGGGCAGAGAGCGAGACTTTT	miRNA	hsa-mir-423	precursor	novel	templated	human	NA	NA		NA	NA	NA	ENST00000362201
AGAGGTAGTAGGTTGCAT	miRNA	ssc-let-7d-5p	mature	known	templated	pig	ssc-let-7d-5p	ssc-let-7d	MI0022120	NA	NA	NA	NA
AGAGGTAGTAGGTTGCATAGT	miRNA	ssc-let-7d-5p	mature	known	templated	pig	ssc-let-7d-5p	ssc-let-7d	MI0022120	NA	NA	NA	NA
AGAGGTAGTAGGTTGCATAGTT	miRNA	ssc-let-7d-5p	mature	known	templated	pig	ssc-let-7d-5p	ssc-let-7d	MI0022120	NA	NA	NA	NA
AGAGGTAGTAGGTTGCATAGTTT	miRNA	ssc-let-7d-5p	mature	known	templated	pig	ssc-let-7d-5p	ssc-let-7d	MI0022120	NA	NA	NA	ENST00000360737,gene_biotype:lincRNA,gene_symbol:MIRLET7BHG
AGAGTTGAGTCTGGACGTCCCG	miRNA	ssc-miR-219a	mature	known	templated	pig	ssc-miR-219a	ssc-mir-219a	MI0017990	NA	NA	NA	NA
AGCACCATCTGAAATCGGTTA	miRNA	ssc-miR-29a	mature	known	templated	pig	ssc-miR-29a	ssc-mir-29a	MI0013090	NA	NA	NA	ENST00000362111,gene_biotype:lincRNA,gene_symbol:MIR29A
AGCAGCAATTCATGTTTTGAA	miRNA	ssc-miR-424-5p	mature	known	templated	pig	ssc-miR-424-5p	ssc-mir-424	MI0013135	NA	NA	NA	ENST00000362227,gene_biotype:lincRNA,gene_symbol:MIR503HG
AGCAGCACGTAAATATTGGCG	miRNA	ssc-miR-16	mature	known	templated	pig	ssc-miR-16	ssc-mir-16-2	MI0008212	NA	NA	NA	NA
AGCAGCATTGTACAGGGCT	miRNA	ssc-miR-107	mature	known	templated	pig	ssc-miR-107	bta-mir-107	MI0005006	NA	NA	NA	NA
AGCAGCATTGTACAGGGCTAT	miRNA	ssc-miR-107	mature	known	templated	pig	ssc-miR-107	bta-mir-107	MI0005006	NA	NA	NA	NA
AGCAGCATTGTACAGGGCTATC	miRNA	ssc-miR-107	mature	known	templated	pig	ssc-miR-107	ssc-mir-107	MI0002449	NA	NA	NA	NA
AGCAGCATTGTACAGGGCTATCA	miRNA	ssc-miR-107	mature	known	templated	pig	ssc-miR-107	ssc-mir-107	MI0002449	NA	NA	NA	NA
AGCAGCATTGTACAGGGCTATG	miRNA	ssc-miR-103	mature	known	templated	pig	ssc-miR-103	ssc-mir-103-2	MI0013105	NA	NA	NA	NA
AGCAGCATTGTACAGGGCTATGA	miRNA	ssc-miR-103	mature	known	templated	pig	ssc-miR-103	ssc-mir-103-2	MI0013105	NA	NA	NA	NA
AGCAGCATTGTACAGGGCTATGAA	miRNA	ssc-miR-103	mature	known	templated	pig	ssc-miR-103	ssc-mir-103-2	MI0013105	NA	NA	NA	NA
AGCAGCGGGAACAGTACT	miRNA	ssc-miR-503	mature	known	templated	pig	ssc-miR-503	ssc-mir-503	MI0010684	NA	NA	NA	NA
AGCAGCGGGAACAGTACTG	miRNA	ssc-miR-503	mature	known	templated	pig	ssc-miR-503	ssc-mir-503	MI0010684	NA	NA	NA	NA
AGCAGCGGGAACAGTACTGCAG	miRNA	ssc-miR-503	mature	known	templated	pig	ssc-miR-503	ssc-mir-503	MI0010684	NA	NA	NA	NA
AGCTAATCAGACTGATGTTGAC	miRNA	hsa-mir-21	precursor	novel	templated	human	NA	NA		NA	NA	NA	ENST00000362134
AGCTACATCTGGCTACTGGGTCT	miRNA	ssc-miR-222	mature	known	templated	pig	ssc-miR-222	ssc-mir-222	MI0013151	NA	NA	NA	NA
AGCTACATCTGGCTACTGGGTCTC	miRNA	ssc-miR-222	mature	known	templated	pig	ssc-miR-222	ssc-mir-222	MI0013151	NA	NA	NA	NA
AGCTACATCTGGCTACTGGGTCTCT	miRNA	ssc-miR-222	mature	known	templated	pig	ssc-miR-222	ssc-mir-222	MI0013151	NA	NA	NA	NA
AGCTACATTGTCTGCTGGGTTT	miRNA	ssc-miR-221-3p	mature	known	templated	pig	ssc-miR-221-3p	ssc-mir-221	MI0008221	NA	NA	NA	NA
AGCTACATTGTCTGCTGGGTTTC	miRNA	ssc-miR-221-3p	mature	known	templated	pig	ssc-miR-221-3p	ssc-mir-221	MI0008221	NA	NA	NA	NA
AGCTCATCAGACTGATGTTGAC	miRNA	hsa-mir-21	precursor	novel	templated	human	NA	NA		NA	NA	NA	ENST00000362134
AGCTCGGCCTGAGGCCCCTCAGT	miRNA	hsa-mir-423	precursor	novel	templated	human	NA	NA		NA	NA	NA	ENST00000362201
AGCTCGGTCCGAGGCCCCTCAGT	miRNA	hsa-mir-423	precursor	novel	templated	human	NA	NA		NA	NA	NA	ENST00000362201
AGCTCGGTCTGAGGCCCCCCAGT	miRNA	hsa-mir-423	precursor	novel	templated	human	NA	NA		NA	NA	NA	ENST00000362201
AGCTCGGTCTGAGGCCCCT	miRNA	ssc-miR-423-3p	mature	known	templated	pig	ssc-miR-423-3p	ssc-mir-423	MI0013099	NA	NA	NA	ENST00000362201
AGCTCGGTCTGAGGCCCCTC	miRNA	ssc-miR-423-3p	mature	known	templated	pig	ssc-miR-423-3p	ssc-mir-423	MI0013099	NA	NA	NA	ENST00000362201
AGCTCGGTCTGAGGCCCCTCA	miRNA	ssc-miR-423-3p	mature	known	templated	pig	ssc-miR-423-3p	ssc-mir-423	MI0013099	NA	NA	NA	ENST00000362201
AGCTCGGTCTGAGGCCCCTCAG	miRNA	ssc-miR-423-3p	mature	known	templated	pig	ssc-miR-423-3p	ssc-mir-423	MI0013099	NA	NA	NA	ENST00000362201
AGCTCGGTCTGAGGCCCCTCAGT	miRNA	ssc-miR-423-3p	mature	known	templated	pig	ssc-miR-423-3p	ssc-mir-423	MI0013099	NA	NA	NA	ENST00000362201
AGCTCGGTCTGAGGCCCCTCAGTC	miRNA	ssc-miR-423-3p	mature	known	templated	pig	ssc-miR-423-3p	ssc-mir-423	MI0013099	NA	NA	NA	ENST00000362201
AGCTCGGTCTGGGGCCCCTCAGT	miRNA	hsa-mir-423	precursor	novel	templated	human	NA	NA		NA	NA	NA	ENST00000362201
AGCTGCCAGTTGAAGAACT	miRNA	ssc-miR-22-3p	mature	known	templated	pig	ssc-miR-22-3p	ssc-mir-22	MI0014770	NA	NA	NA	ENST00000334146,gene_biotype:lincRNA,gene_symbol:MIR22HG
AGCTGCCAGTTGAAGAACTGT	miRNA	ssc-miR-22-3p	mature	known	templated	pig	ssc-miR-22-3p	ssc-mir-22	MI0014770	NA	NA	NA	ENST00000334146,gene_biotype:lincRNA,gene_symbol:MIR22HG
AGCTTACCAGACTGATGTTGAC	miRNA	hsa-mir-21	precursor	novel	templated	human	NA	NA		NA	NA	NA	ENST00000362134
AGCTTATCAGACAGATGTTGAC	miRNA	hsa-mir-21	precursor	novel	templated	human	NA	NA		NA	NA	NA	ENST00000362134
AGCTTATCAGACCGATGTTGAC	miRNA	hsa-mir-21	precursor	novel	templated	human	NA	NA		NA	NA	NA	ENST00000362134
AGCTTATCAGACTAATGTTGAC	miRNA	hsa-mir-21	precursor	novel	templated	human	NA	NA		NA	NA	NA	ENST00000362134
AGCTTATCAGACTGACGTTGAC	miRNA	hsa-mir-21	precursor	novel	templated	human	NA	NA		NA	NA	NA	ENST00000362134
AGCTTATCAGACTGATATTGAC	miRNA	hsa-mir-21	precursor	novel	templated	human	NA	NA		NA	NA	NA	ENST00000362134
AGCTTATCAGACTGATG	miRNA	ssc-miR-21	mature	known	templated	pig	ssc-miR-21	ssc-mir-21	MI0002459	NA	NA	NA	ENST00000362134
AGCTTATCAGACTGATGCTGAC	miRNA	hsa-mir-21	precursor	novel	templated	human	NA	NA		NA	NA	NA	ENST00000362134
AGCTTATCAGACTGATGT	miRNA	ssc-miR-21	mature	known	templated	pig	ssc-miR-21	ssc-mir-21	MI0002459	NA	NA	NA	ENST00000362134
AGCTTATCAGACTGATGTT	miRNA	ssc-miR-21	mature	known	templated	pig	ssc-miR-21	ssc-mir-21	MI0002459	NA	NA	NA	ENST00000362134
AGCTTATCAGACTGATGTTG	miRNA	ssc-miR-21	mature	known	templated	pig	ssc-miR-21	ssc-mir-21	MI0002459	NA	NA	NA	ENST00000362134
AGCTTATCAGACTGATGTTGA	miRNA	ssc-miR-21	mature	known	templated	pig	ssc-miR-21	ssc-mir-21	MI0002459	NA	NA	NA	ENST00000362134
AGCTTATCAGACTGATGTTGAAA	miRNA	hsa-mir-21	precursor	novel	templated	human	NA	NA		NA	NA	NA	ENST00000362134
AGCTTATCAGACTGATGTTGAC	miRNA	ssc-miR-20a	mature	known	templated	pig	ssc-miR-20a	ssc-mir-21	MI0002459	NA	NA	NA	ENST00000362134
AGCTTATCAGACTGATGTTGACT	miRNA	bta-miR-21-5p	mature	novel	templated	cattle	bta-miR-21-5p	ssc-mir-21	MI0002459	NA	NA	NA	ENST00000362134
AGCTTATCAGACTGGTGTTGAC	miRNA	hsa-mir-21	precursor	novel	templated	human	NA	NA		NA	NA	NA	ENST00000362134
AGCTTATCAGACTGTTGTTGAC	miRNA	hsa-mir-21	precursor	novel	templated	human	NA	NA		NA	NA	NA	ENST00000362134
AGCTTATCAGGCTGATGTTGAC	miRNA	hsa-mir-21	precursor	novel	templated	human	NA	NA		NA	NA	NA	ENST00000362134
AGCTTATCGGACTGATGTTGAC	miRNA	hsa-mir-21	precursor	novel	templated	human	NA	NA		NA	NA	NA	ENST00000362134
AGCTTATCTGACTGATGTTGAC	miRNA	hsa-mir-21	precursor	novel	templated	human	NA	NA		NA	NA	NA	ENST00000362134
AGCTTATTAGACTGATGTTGAC	miRNA	hsa-mir-21	precursor	novel	templated	human	NA	NA		NA	NA	NA	ENST00000362134
AGCTTGTCAGACTGATGTTGAC	miRNA	hsa-mir-21	precursor	novel	templated	human	NA	NA		NA	NA	NA	ENST00000362134
[truncated: 44,155 more rows]
