# Supplementary material for: Small RNA-seq analysis of single porcine blastocysts revealed that maternal estradiol-17beta exposure does not affect miRNA isoform (isomiR) expression
Source: BMC Genomics. 2018 Aug 6;19:590. doi: 10.1186/s12864-018-4954-9 (PMC6090871; doi:10.1186/s12864-018-4954-9)
Supplement: Supplementary file 12 — Table S6. MiRmine result of potential embryo- and endometrium-specific miRNAs. (XLSX 67 kb) [file 12864_2018_4954_MOESM12_ESM.xlsx]

## Sheet: hsa-miR-371a-5p
Expression values (RPM) of hsa-miR-371a-5p
Experiment ID	Sample ID	Tissue	Description	Disease	Sex	PubMed ID	hsa-miR-371a-5p
DRX011933	DRS011775	Bladder	Sample#9_bladder cancer_UC_G2_pT2_92yo_female	Bladder cancer	Female	24520312	1164.4
DRX011930	DRS011772	Bladder	Sample#6_bladder cancer_UC_G3_pT2_65yo_male	Bladder cancer	Male	24520312	127.2
DRX011934	DRS011776	Bladder	Sample#10_bladder cancer_UC_G3_pT2_83yo_male	Bladder cancer	Male	24520312	3.1
DRX011932	DRS011774	Bladder	Sample#8_bladder cancer_UC_G2_pT2_91yo_male	Bladder cancer	Male	24520312	0.5
DRX011931	DRS011773	Bladder	Sample#7_bladder cancer_UC>SCC_G3_pT3_76yo_male	Bladder cancer	Male	24520312	0.3
DRX011928	DRS011770	Bladder	Sample#4_normal bladder epithelia	Normal		24520312	0.8
DRX011927	DRS011769	Bladder	Sample#3_normal bladder epithelia	Normal		24520312	0.7
DRX011926	DRS011768	Bladder	Sample#2_normal bladder epithelia	Normal		24520312	0.6
DRX011929	DRS011771	Bladder	Sample#5_normal bladder epithelia	Normal		24520312	0.5
DRX011925	DRS011767	Bladder	Sample#1_normal bladder epithelia	Normal		24520312	0.3
SRX318180	SRS455116	Blood	Peripheral blood mononuclear cells (Control_Ou)	Normal		24084574	0
SRX318164	SRS455099	Blood	Peripheral blood mononuclear cells (osteopetrosis_Ou)	Osteopetrosis		24084574	0
SRX386681	SRS510687	Blood	BGI-Fam150			25074712	0.1
DRX012360	DRS012097	Blood	CD19+ B Cells, donor1			24670764	0
DRX012361	DRS012098	Blood	CD19+ B Cells, donor2			24670764	0
DRX012362	DRS012099	Blood	CD19+ B Cells, donor3			24670764	0
SRX375461	SRS500655	Brain	ETMR3-R-rna	Embryonal brain tumor	Male	24316981	202.6
SRX375448	SRS499217	Brain	ETMR1-rna	Embryonal brain tumor	Female	24316981	201.4
SRX375462	SRS500656	Brain	ETMR4-rna	Embryonal brain tumor	Female	24316981	123.3
SRX375455	SRS500629	Brain	ETMR3-rna	Embryonal brain tumor	Male	24316981	72.3
SRX375463	SRS500658	Brain	ETMR5-rna	Embryonal brain tumor	Female	24316981	58.2
SRX375452	SRS499468	Brain	ETMR2-R-rna	Embryonal brain tumor	Female	24316981	27.2
SRX375450	SRS499241	Brain	ETMR2-rna	Embryonal brain tumor	Female	24316981	22.5
SRX513284	SRS590233	Breast	Tumor tissue	Breast cancer		24904649	87
SRX513283	SRS590232	Breast	Tumor serum	Breast cancer		24904649	47.5
ERX358440	ERS384432	Hair follicle	Dermal papilla			24582062	0
ERX358441	ERS384432	Hair follicle	Dermal papilla			24582062	0
ERX358442	ERS384432	Hair follicle	Dermal papilla			24582062	0
ERX358443	ERS384432	Hair follicle	Dermal papilla			24582062	0
ERX358444	ERS384432	Hair follicle	Dermal papilla			24582062	0
ERX358445	ERS384432	Hair follicle	Dermal papilla			24582062	0
ERX358446	ERS384432	Hair follicle	Dermal papilla			24582062	0
ERX358447	ERS384432	Hair follicle	Dermal papilla			24582062	0
ERX358448	ERS384432	Hair follicle	Dermal papilla			24582062	0
ERX358449	ERS384432	Hair follicle	Dermal papilla			24582062	0
ERX358450	ERS384432	Hair follicle	Dermal papilla			24582062	0
DRX003170	DRS003336	Lung	Adenocarcinoma with bone metastasis	Cancer		23593434	0
DRX003171	DRS003337	Lung	Adenocarcinoma without bone metastasis	Cancer		23593434	0
SRX345916	SRS477184	Nasopharynx	FFPE-NPC1	Nasopharyngeal carcinoma		24393330	0.4
SRX345905	SRS477175	Nasopharynx	FFPE-NPC3	Nasopharyngeal carcinoma		24393330	0
SRX345917	SRS477185	Nasopharynx	FFPE-NPC2	Nasopharyngeal carcinoma		24393330	0
SRX345908	SRS477179	Nasopharynx	FFPE-Ctrl2			24393330	0.4
SRX345906	SRS477176	Nasopharynx	FFPE-Ctrl1			24393330	0.3
SRX290617	SRS431779	Pancreas	Islets of Langerhans (Isl3)		Female	23372846	0.2
SRX290623	SRS431785	Pancreas	Beta-cells (Beta2)		Female	23372846	0.2
SRX290626	SRS431788	Pancreas	Beta-cells (Beta3)		Female	23372846	0.1
SRX290576	SRS431738	Pancreas	Islets of Langerhans (Isl1)		Male	23372846	0
SRX290601	SRS431763	Pancreas	Islets of Langerhans (Isl2)		Female	23372846	0
SRX290620	SRS431782	Pancreas	Beta-cells (Beta1)		Male	23372846	0
SRX262199	SRS409141	Placenta	placenta_trio_8	Normal	not_documented	23440203	270.5
SRX262201	SRS409143	Placenta	placenta_trio_10	Normal	not_documented	23440203	265.7
SRX262203	SRS409145	Placenta	placenta_trio_12	Normal	not_documented	23440203	232.7
SRX262202	SRS409144	Placenta	placenta_trio_11	Normal	not_documented	23440203	158.3
SRX262200	SRS409142	Placenta	placenta_trio_9	Normal	not_documented	23440203	76.4
SRX262197	SRS409139	Placenta	placenta_trio_6	Normal	not_documented	23440203	64.7
SRX262198	SRS409140	Placenta	placenta_trio_7	Normal	not_documented	23440203	30.6
SRX262196	SRS409138	Placenta	placenta_trio_5	Normal	not_documented	23440203	22
SRX352359	SRS481324	Plasma	CFS1	Chronic fatigue syndrome	Female	25238588	0.4
SRX349101	SRS481324	Plasma	CFS1	Chronic fatigue syndrome	Female	25238588	0.1
SRX262189	SRS409131	Plasma	umbilical_trio_11	Normal	not_documented	23440203	218.7
SRX262190	SRS409132	Plasma	umbilical_trio_12	Normal	not_documented	23440203	156.6
SRX262188	SRS409130	Plasma	umbilical_trio_10	Normal	not_documented	23440203	39.8
SRX262178	SRS409120	Plasma	mother_trio_8	Normal	Female	23440203	3.8
SRX262185	SRS409127	Plasma	umbilical_trio_6	Normal	not_documented	23440203	0.3
SRX262186	SRS409128	Plasma	umbilical_trio_7	Normal	not_documented	23440203	0.2
SRX262174	SRS402752	Plasma	mother_trio_1	Normal	Female	23440203	0
SRX262175	SRS409117	Plasma	mother_trio_2	Normal	Female	23440203	0
SRX262176	SRS409118	Plasma	mother_trio_3	Normal	Female	23440203	0
SRX262177	SRS409119	Plasma	mother_trio_6	Normal	Female	23440203	0
SRX262179	SRS409121	Plasma	mother_trio_10	Normal	Female	23440203	0
SRX262180	SRS409122	Plasma	mother_trio_12	Normal	Female	23440203	0
SRX262181	SRS409123	Plasma	umbilical_trio_1	Normal	not_documented	23440203	0
SRX262182	SRS409124	Plasma	umbilical_trio_2	Normal	not_documented	23440203	0
SRX262183	SRS409125	Plasma	umbilical_trio_3	Normal	not_documented	23440203	0
SRX262184	SRS409126	Plasma	umbilical_trio_4	Normal	not_documented	23440203	0
SRX262187	SRS409129	Plasma	umbilical_trio_8	Normal	not_documented	23440203	0
SRX262191	SRS409133	Plasma	father_trio_1	Normal	Male	23440203	0
SRX262192	SRS409134	Plasma	father_trio_6	Normal	Male	23440203	0
SRX262193	SRS409135	Plasma	father_trio_8	Normal	Male	23440203	0
SRX262194	SRS409136	Plasma	father_trio_10	Normal	Male	23440203	0
SRX262195	SRS409137	Plasma	father_trio_12	Normal	Male	23440203	0
SRX262204	SRS409146	Plasma	non_pregnant_1	Normal	Female	23440203	0
SRX262205	SRS409147	Plasma	non_pregnant_2	Normal	Female	23440203	0
DRX005947	DRS005866	Saliva	Salivary exosome II	Normal		23302638	50.1
DRX005946	DRS005865	Saliva	Salivary exosome I	Normal		23302638	0
DRX005948	DRS005867	Saliva	Whole Saliva	Normal		23302638	0
SRX514980	SRS591050	Semen	Control	Normal		24859988	8.5
SRX514979	SRS591048	Semen	Biopsy-proven cancer	Prostate cancer		24859988	29.7
SRX345910	SRS477187	Serum	Sera-MalayLow	Nasopharyngeal carcinoma		24393330	0
SRX345913	SRS477183	Serum	Sera-MalayMid	Nasopharyngeal carcinoma		24393330	0
SRX345915	SRS477181	Serum	Sera-MalayHigh	Nasopharyngeal carcinoma		24393330	0
SRX262206	SRS409148	Serum	non_pregnant_3	Normal	Female	23440203	0
SRX262207	SRS409149	Serum	non_pregnant_4	Normal	Female	23440203	0
SRX262208	SRS409150	Serum	non_pregnant_5	Normal	Female	23440203	0
SRX345909	SRS477180	Serum	Sera-MalayCtrl			24393330	0
SRX528316	SRS598161	Sperm	Adult donor 1			24835570	68
SRX528317	SRS598162	Sperm	Adult donor 2			24835570	9.9
SRX271416	SRS415823	Testis	OD36264-18 , obtained from NDRI		Male	24981367	51
SRX271417	SRS415824	Testis	1203013_AM7972, purchased from Ambion		Male	24981367	30.7
SRX271415	SRS415822	Testis	1206014_AM7972, purchased from Ambion		Male	24981367	12.3

## Sheet: hsa-miR-378a-5p
Expression values (RPM) of hsa-miR-378a-5p
Experiment ID	Sample ID	Tissue	Description	Disease	Sex	PubMed ID	hsa-miR-378a-5p
DRX011932	DRS011774	Bladder	Sample#8_bladder cancer_UC_G2_pT2_91yo_male	Bladder cancer	Male	24520312	3.9
DRX011934	DRS011776	Bladder	Sample#10_bladder cancer_UC_G3_pT2_83yo_male	Bladder cancer	Male	24520312	3.9
DRX011930	DRS011772	Bladder	Sample#6_bladder cancer_UC_G3_pT2_65yo_male	Bladder cancer	Male	24520312	3.8
DRX011933	DRS011775	Bladder	Sample#9_bladder cancer_UC_G2_pT2_92yo_female	Bladder cancer	Female	24520312	3.7
DRX011931	DRS011773	Bladder	Sample#7_bladder cancer_UC>SCC_G3_pT3_76yo_male	Bladder cancer	Male	24520312	1.4
DRX011929	DRS011771	Bladder	Sample#5_normal bladder epithelia	Normal		24520312	2.8
DRX011927	DRS011769	Bladder	Sample#3_normal bladder epithelia	Normal		24520312	2.4
DRX011926	DRS011768	Bladder	Sample#2_normal bladder epithelia	Normal		24520312	2.2
DRX011925	DRS011767	Bladder	Sample#1_normal bladder epithelia	Normal		24520312	2
DRX011928	DRS011770	Bladder	Sample#4_normal bladder epithelia	Normal		24520312	1.9
SRX318180	SRS455116	Blood	Peripheral blood mononuclear cells (Control_Ou)	Normal		24084574	0.2
SRX666578	SRS671268	Blood	Macrophage uninfected Day 5			23592263	1170.5
SRX666579	SRS671269	Blood	Macrophage ADA Day 27			23592263	1058.1
SRX426478	SRS530036	Blood	hPBMCs exposed to F. tularensis Schu S4 (120 minutes)				47.1
SRX426125	SRS523362	Blood	hPBMCs exposed to E. coli DH5? (120 minutes)				46.6
SRX426475	SRS530036	Blood	hPBMCs exposed to F. tularensis Schu S4 (30, 60, and 120 min)				37.4
SRX426124	SRS523362	Blood	hPBMCs exposed to E. coli DH5? (60 minutes)				33.5
DRX012362	DRS012099	Blood	CD19+ B Cells, donor3			24670764	28.2
SRX426123	SRS523362	Blood	hPBMCs exposed to E. coli DH5? (30 minutes)				23.3
DRX012360	DRS012097	Blood	CD19+ B Cells, donor1			24670764	19.6
DRX012361	DRS012098	Blood	CD19+ B Cells, donor2			24670764	19.4
SRX666576	SRS671266	Blood	CD4+ BaL Day 3			23592263	6.6
SRX666577	SRS671267	Blood	CD4+ NL4-3 Day 3			23592263	4.1
SRX666575	SRS671265	Blood	CD4+ uninfected Day 3			23592263	4
SRX386679	SRS510685	Blood	BGI-150p1			25074712	2.3
SRX386680	SRS510686	Blood	BGI-150p2			25074712	0.9
SRX386681	SRS510687	Blood	BGI-Fam150			25074712	0.9
SRX375450	SRS499241	Brain	ETMR2-rna	Embryonal brain tumor	Female	24316981	31.4
SRX375461	SRS500655	Brain	ETMR3-R-rna	Embryonal brain tumor	Male	24316981	20.1
SRX375455	SRS500629	Brain	ETMR3-rna	Embryonal brain tumor	Male	24316981	11.9
SRX375452	SRS499468	Brain	ETMR2-R-rna	Embryonal brain tumor	Female	24316981	10.6
SRX375448	SRS499217	Brain	ETMR1-rna	Embryonal brain tumor	Female	24316981	8
SRX375463	SRS500658	Brain	ETMR5-rna	Embryonal brain tumor	Female	24316981	3.1
SRX375462	SRS500656	Brain	ETMR4-rna	Embryonal brain tumor	Female	24316981	2.5
SRX375467	SRS500669	Brain	PNET3-rna	Primitive neuroectodermal tumor	Female	24316981	24.1
SRX375466	SRS500667	Brain	PNET2-rna	Primitive neuroectodermal tumor	Male	24316981	14
SRX513283	SRS590232	Breast	Tumor serum	Breast cancer		24904649	665.4
SRX513284	SRS590233	Breast	Tumor tissue	Breast cancer		24904649	522.1
SRX513285	SRS590234	Breast	Serum from healthy woman control	Normal		24904649	692.6
SRX513286	SRS590235	Breast	Normal tissue	Normal		24904649	208.7
ERX358440	ERS384432	Hair follicle	Dermal papilla			24582062	0
ERX358441	ERS384432	Hair follicle	Dermal papilla			24582062	0
ERX358442	ERS384432	Hair follicle	Dermal papilla			24582062	0
ERX358443	ERS384432	Hair follicle	Dermal papilla			24582062	0
ERX358444	ERS384432	Hair follicle	Dermal papilla			24582062	0
SRX353113	SRS481826	Liver	Cirrhotic liver	Liver cirrhosis		24009312	38.4
DRX003170	DRS003336	Lung	Adenocarcinoma with bone metastasis	Cancer		23593434	0.1
DRX003171	DRS003337	Lung	Adenocarcinoma without bone metastasis	Cancer		23593434	0.1
SRX345905	SRS477175	Nasopharynx	FFPE-NPC3	Nasopharyngeal carcinoma		24393330	45.9
SRX345917	SRS477185	Nasopharynx	FFPE-NPC2	Nasopharyngeal carcinoma		24393330	24
SRX345916	SRS477184	Nasopharynx	FFPE-NPC1	Nasopharyngeal carcinoma		24393330	15.1
SRX345908	SRS477179	Nasopharynx	FFPE-Ctrl2			24393330	28.8
SRX345906	SRS477176	Nasopharynx	FFPE-Ctrl1			24393330	25.4
SRX290576	SRS431738	Pancreas	Islets of Langerhans (Isl1)		Male	23372846	1.1
SRX290617	SRS431779	Pancreas	Islets of Langerhans (Isl3)		Female	23372846	0.5
SRX290626	SRS431788	Pancreas	Beta-cells (Beta3)		Female	23372846	0.1
SRX262199	SRS409141	Placenta	placenta_trio_8	Normal	not_documented	23440203	15.5
SRX262198	SRS409140	Placenta	placenta_trio_7	Normal	not_documented	23440203	9.8
SRX262203	SRS409145	Placenta	placenta_trio_12	Normal	not_documented	23440203	8.8
SRX262196	SRS409138	Placenta	placenta_trio_5	Normal	not_documented	23440203	5.8
SRX262200	SRS409142	Placenta	placenta_trio_9	Normal	not_documented	23440203	4.4
SRX262197	SRS409139	Placenta	placenta_trio_6	Normal	not_documented	23440203	3.6
SRX362355	SRS489180	Plasma	CFS5	Chronic fatigue syndrome	Female	25238588	5.4
SRX362353	SRS489178	Plasma	CFS3	Chronic fatigue syndrome	Female	25238588	4.7
SRX362354	SRS489179	Plasma	CFS4	Chronic fatigue syndrome	Female	25238588	4
SRX349101	SRS481324	Plasma	CFS1	Chronic fatigue syndrome	Female	25238588	3.8
SRX352359	SRS481324	Plasma	CFS1	Chronic fatigue syndrome	Female	25238588	2.9
SRX362352	SRS489176	Plasma	CFS2	Chronic fatigue syndrome	Female	25238588	2.7
SRX362356	SRS489181	Plasma	CFS6	Chronic fatigue syndrome	Female	25238588	2.4
SRX362357	SRS489182	Plasma	NF1	Non-fatigued	Female	25238588	7
SRX362359	SRS489184	Plasma	NF3	Non-fatigued	Female	25238588	5.8
SRX362361	SRS489186	Plasma	NF5	Non-fatigued	Female	25238588	4.5
SRX362358	SRS489183	Plasma	NF2	Non-fatigued	Female	25238588	3.5
SRX362360	SRS489185	Plasma	NF4	Non-fatigued	Female	25238588	2.6
SRX362362	SRS489187	Plasma	NF6	Non-fatigued	Female	25238588	2.2
SRX262182	SRS409124	Plasma	umbilical_trio_2	Normal	not_documented	23440203	1363.1
SRX262179	SRS409121	Plasma	mother_trio_10	Normal	Female	23440203	168.2
SRX262184	SRS409126	Plasma	umbilical_trio_4	Normal	not_documented	23440203	72.6
SRX262195	SRS409137	Plasma	father_trio_12	Normal	Male	23440203	59.4
SRX262183	SRS409125	Plasma	umbilical_trio_3	Normal	not_documented	23440203	58.5
SRX262188	SRS409130	Plasma	umbilical_trio_10	Normal	not_documented	23440203	55.4
SRX262181	SRS409123	Plasma	umbilical_trio_1	Normal	not_documented	23440203	25.5
SRX262194	SRS409136	Plasma	father_trio_10	Normal	Male	23440203	23.2
SRX262192	SRS409134	Plasma	father_trio_6	Normal	Male	23440203	22.1
SRX262204	SRS409146	Plasma	non_pregnant_1	Normal	Female	23440203	15.8
SRX262191	SRS409133	Plasma	father_trio_1	Normal	Male	23440203	11
SRX262185	SRS409127	Plasma	umbilical_trio_6	Normal	not_documented	23440203	9.1
SRX262177	SRS409119	Plasma	mother_trio_6	Normal	Female	23440203	8.5
SRX262193	SRS409135	Plasma	father_trio_8	Normal	Male	23440203	5.6
SRX262186	SRS409128	Plasma	umbilical_trio_7	Normal	not_documented	23440203	5.2
DRX005948	DRS005867	Saliva	Whole Saliva	Normal		23302638	27.8
DRX005946	DRS005865	Saliva	Salivary exosome I	Normal		23302638	0
DRX005947	DRS005866	Saliva	Salivary exosome II	Normal		23302638	0
SRX514980	SRS591050	Semen	Control	Normal		24859988	43.5
SRX514979	SRS591048	Semen	Biopsy-proven cancer	Prostate cancer		24859988	4.8
SRX345910	SRS477187	Serum	Sera-MalayLow	Nasopharyngeal carcinoma		24393330	0.9
SRX262208	SRS409150	Serum	non_pregnant_5	Normal	Female	23440203	114.2
SRX528316	SRS598161	Sperm	Adult donor 1			24835570	1.1
SRX271417	SRS415824	Testis	1203013_AM7972, purchased from Ambion		Male	24981367	12.3
SRX271416	SRS415823	Testis	OD36264-18 , obtained from NDRI		Male	24981367	3.9

## Sheet: hsa-miR-7-5p
Expression values (RPM) of hsa-miR-7-5p
Experiment ID	Sample ID	Tissue	Description	Disease	Sex	PubMed ID	hsa-miR-7-5p	hsa-miR-7-5p	hsa-miR-7-5p
SRX290620	SRS431782	Pancreas	Beta-cells (Beta1)		Male	23372846	50782.4	51071.9	50077.4
SRX290601	SRS431763	Pancreas	Islets of Langerhans (Isl2)		Female	23372846	40197.6	40569.8	39814.8
SRX262180	SRS409122	Plasma	mother_trio_12	Normal	Female	23440203	6877.6	328.9	4036.8
SRX271416	SRS415823	Testis	OD36264-18 , obtained from NDRI		Male	24981367	1733.6	1663	1661.1
SRX290576	SRS431738	Pancreas	Islets of Langerhans (Isl1)		Male	23372846	1475.4	1571.5	1437.9
SRX262195	SRS409137	Plasma	father_trio_12	Normal	Male	23440203	1416.1	440.7	440.7
SRX271415	SRS415822	Testis	1206014_AM7972, purchased from Ambion		Male	24981367	1308.4	1283.8	1296.1
SRX513283	SRS590232	Breast	Tumor serum	Breast cancer		24904649	1235.8	1425.9	1045.7
SRX271417	SRS415824	Testis	1203013_AM7972, purchased from Ambion		Male	24981367	1063.1	928.1	940.4
SRX262204	SRS409146	Plasma	non_pregnant_1	Normal	Female	23440203	937.7	841.2	19
SRX528317	SRS598162	Sperm	Adult donor 2			24835570	894.3	891.3	862.7
SRX262203	SRS409145	Placenta	placenta_trio_12	Normal	not_documented	23440203	789.5	67.3	447.1
SRX513286	SRS590235	Breast	Normal tissue	Normal		24904649	718.9	718.9	649.3
SRX262188	SRS409130	Plasma	umbilical_trio_10	Normal	not_documented	23440203	639.8	83.4	82.9
SRX513284	SRS590233	Breast	Tumor tissue	Breast cancer		24904649	638.1	464.1	464.1
SRX513285	SRS590234	Breast	Serum from healthy woman control	Normal		24904649	507.9	461.7	323.2
SRX262179	SRS409121	Plasma	mother_trio_10	Normal	Female	23440203	411.2	243	243
SRX262197	SRS409139	Placenta	placenta_trio_6	Normal	not_documented	23440203	380.9	19.2	158.1
SRX528316	SRS598161	Sperm	Adult donor 1			24835570	369.8	348.4	348.4
SRX375462	SRS500656	Brain	ETMR4-rna	Embryonal brain tumor	Female	24316981	358.1	358.9	345.6
SRX262208	SRS409150	Serum	non_pregnant_5	Normal	Female	23440203	266.4	87	87
SRX262200	SRS409142	Placenta	placenta_trio_9	Normal	not_documented	23440203	232	27.9	166
SRX349069	SRS479660	Serum	Control	Normal		24349033	230.9	230.9	230.9
SRX262186	SRS409128	Plasma	umbilical_trio_7	Normal	not_documented	23440203	215.8	55.4	488.2
SRX262193	SRS409135	Plasma	father_trio_8	Normal	Male	23440203	202.8	98.9	344.9
DRX005947	DRS005866	Saliva	Salivary exosome II	Normal		23302638	192.1	192.1	192.1
SRX349068	SRS479660	Serum	Patient infected TB	Tuberculosis		24349033	178.1	177.7	177.7
SRX262177	SRS409119	Plasma	mother_trio_6	Normal	Female	23440203	165.8	73.1	431.5
SRX262196	SRS409138	Placenta	placenta_trio_5	Normal	not_documented	23440203	160.5	16	90.6
SRX290617	SRS431779	Pancreas	Islets of Langerhans (Isl3)		Female	23372846	143.9	142.3	140.1
SRX666576	SRS671266	Blood	CD4+ BaL Day 3			23592263	132.7	125.4	125.1
SRX666577	SRS671267	Blood	CD4+ NL4-3 Day 3			23592263	121.8	112.5	112.2
SRX290626	SRS431788	Pancreas	Beta-cells (Beta3)		Female	23372846	120.6	120	118.3
SRX262185	SRS409127	Plasma	umbilical_trio_6	Normal	not_documented	23440203	116.3	48	432.8
SRX375463	SRS500658	Brain	ETMR5-rna	Embryonal brain tumor	Female	24316981	103	109	97.8
SRX666575	SRS671265	Blood	CD4+ uninfected Day 3			23592263	89.3	81.4	81.1
SRX262202	SRS409144	Placenta	placenta_trio_11	Normal	not_documented	23440203	87.9	35.2	35.2
SRX262192	SRS409134	Plasma	father_trio_6	Normal	Male	23440203	84.7	45.3	178.8
SRX386680	SRS510686	Blood	BGI-150p2			25074712	83.8	83	82.8
SRX262205	SRS409147	Plasma	non_pregnant_2	Normal	Female	23440203	79.3	0	0
SRX262183	SRS409125	Plasma	umbilical_trio_3	Normal	not_documented	23440203	78	19.5	19.5
SRX386679	SRS510685	Blood	BGI-150p1			25074712	75.3	74.5	74.4
SRX290623	SRS431785	Pancreas	Beta-cells (Beta2)		Female	23372846	74.5	73.4	72.7
SRX386681	SRS510687	Blood	BGI-Fam150			25074712	73.3	72.4	72.3
SRX262191	SRS409133	Plasma	father_trio_1	Normal	Male	23440203	63.8	34	103
SRX375448	SRS499217	Brain	ETMR1-rna	Embryonal brain tumor	Female	24316981	60.4	65	57.6
DRX011931	DRS011773	Bladder	Sample#7_bladder cancer_UC>SCC_G3_pT3_76yo_male	Bladder cancer	Male	24520312	58.9	58.1	58.2
SRX262175	SRS409117	Plasma	mother_trio_2	Normal	Female	23440203	55.7	55.7	222.9
SRX375143	SRS500421	Serum	Patients with active pulmonary tuberculosis (XQD)	Tuberculosis		24586438	49.6	49.6	49.6
DRX005948	DRS005867	Saliva	Whole Saliva	Normal		23302638	46.3	46.3	46.3
SRX375455	SRS500629	Brain	ETMR3-rna	Embryonal brain tumor	Male	24316981	43	49.2	40.4
SRX375466	SRS500667	Brain	PNET2-rna	Primitive neuroectodermal tumor	Male	24316981	39.3	36.5	35.1
DRX011934	DRS011776	Bladder	Sample#10_bladder cancer_UC_G3_pT2_83yo_male	Bladder cancer	Male	24520312	34.8	34.8	34.8
SRX262174	SRS402752	Plasma	mother_trio_1	Normal	Female	23440203	33	33	33
SRX666578	SRS671268	Blood	Macrophage uninfected Day 5			23592263	26.7	25.7	26
DRX012360	DRS012097	Blood	CD19+ B Cells, donor1			24670764	26.6	25.5	25.1
DRX012361	DRS012098	Blood	CD19+ B Cells, donor2			24670764	25.6	25.3	24.9
SRX345905	SRS477175	Nasopharynx	FFPE-NPC3	Nasopharyngeal carcinoma		24393330	24.4	23.4	22.9
SRX262184	SRS409126	Plasma	umbilical_trio_4	Normal	not_documented	23440203	24.2	24.2	24.2
DRX011930	DRS011772	Bladder	Sample#6_bladder cancer_UC_G3_pT2_65yo_male	Bladder cancer	Male	24520312	23.6	23.6	23.5
SRX375461	SRS500655	Brain	ETMR3-R-rna	Embryonal brain tumor	Male	24316981	23.1	23.1	19.5
DRX012362	DRS012099	Blood	CD19+ B Cells, donor3			24670764	20.8	19.7	19.4
DRX005946	DRS005865	Saliva	Salivary exosome I	Normal		23302638	19.2	19.2	19.2
SRX262178	SRS409120	Plasma	mother_trio_8	Normal	Female	23440203	12.7	375.5	673.3
DRX011933	DRS011775	Bladder	Sample#9_bladder cancer_UC_G2_pT2_92yo_female	Bladder cancer	Female	24520312	11.8	11.9	11.8
SRX262194	SRS409136	Plasma	father_trio_10	Normal	Male	23440203	10.8	15.5	2598.6
SRX375450	SRS499241	Brain	ETMR2-rna	Embryonal brain tumor	Female	24316981	10.5	15	10.5
DRX003170	DRS003336	Lung	Adenocarcinoma with bone metastasis	Cancer		23593434	9.7	9.7	9.7
SRX514979	SRS591048	Semen	Biopsy-proven cancer	Prostate cancer		24859988	9.6	9.6	9.6
SRX262176	SRS409118	Plasma	mother_trio_3	Normal	Female	23440203	7.9	714.9	1327.7
DRX003171	DRS003337	Lung	Adenocarcinoma without bone metastasis	Cancer		23593434	7.8	7.8	7.8
SRX345917	SRS477185	Nasopharynx	FFPE-NPC2	Nasopharyngeal carcinoma		24393330	7.6	7.6	7.6
SRX666579	SRS671269	Blood	Macrophage ADA Day 27			23592263	7.3	7.3	7.3
SRX345916	SRS477184	Nasopharynx	FFPE-NPC1	Nasopharyngeal carcinoma		24393330	6.9	5.7	5.7
SRX426123	SRS523362	Blood	hPBMCs exposed to E. coli DH5? (30 minutes)				6.3	5.9	5.9
SRX318180	SRS455116	Blood	Peripheral blood mononuclear cells (Control_Ou)	Normal		24084574	5.7	5.8	5.7
SRX426124	SRS523362	Blood	hPBMCs exposed to E. coli DH5? (60 minutes)				5.4	5.2	5.2
SRX426478	SRS530036	Blood	hPBMCs exposed to F. tularensis Schu S4 (120 minutes)				5.1	5.3	5.1
SRX262187	SRS409129	Plasma	umbilical_trio_8	Normal	not_documented	23440203	4.7	4.7	1548
SRX426475	SRS530036	Blood	hPBMCs exposed to F. tularensis Schu S4 (30, 60, and 120 min)				4.3	4.3	4.3
SRX353113	SRS481826	Liver	Cirrhotic liver	Liver cirrhosis		24009312	4.1	3.3	3.3
SRX375452	SRS499468	Brain	ETMR2-R-rna	Embryonal brain tumor	Female	24316981	4	4	4
SRX426125	SRS523362	Blood	hPBMCs exposed to E. coli DH5? (120 minutes)				4	4	4
DRX011932	DRS011774	Bladder	Sample#8_bladder cancer_UC_G2_pT2_91yo_male	Bladder cancer	Male	24520312	3.9	3.9	3.9
DRX011927	DRS011769	Bladder	Sample#3_normal bladder epithelia	Normal		24520312	3.8	3.8	3.8
DRX011926	DRS011768	Bladder	Sample#2_normal bladder epithelia	Normal		24520312	3.6	3.6	3.6
DRX011929	DRS011771	Bladder	Sample#5_normal bladder epithelia	Normal		24520312	3.2	3.2	3.2
SRX318164	SRS455099	Blood	Peripheral blood mononuclear cells (osteopetrosis_Ou)	Osteopetrosis		24084574	3.2	3.2	3.2
SRX345906	SRS477176	Nasopharynx	FFPE-Ctrl1			24393330	3.2	3.2	3.2
DRX011928	DRS011770	Bladder	Sample#4_normal bladder epithelia	Normal		24520312	3.1	3.1	3.1
SRX345908	SRS477179	Nasopharynx	FFPE-Ctrl2			24393330	2.9	2.6	2.6
DRX011925	DRS011767	Bladder	Sample#1_normal bladder epithelia	Normal		24520312	2.8	2.8	2.8
SRX375142	SRS500420	Serum	Healthy un-inoculated individuals (XQC)	Normal		24586438	2.1	2.1	2.1
SRX514980	SRS591050	Semen	Control	Normal		24859988	1.6	1.6	1.6
SRX375464	SRS500666	Brain	PNET1-rna	Primitive neuroectodermal tumor	Male	24316981	1	1	1
ERX358440	ERS384432	Hair follicle	Dermal papilla			24582062	0	0	0
ERX358441	ERS384432	Hair follicle	Dermal papilla			24582062	0	0	0
ERX358442	ERS384432	Hair follicle	Dermal papilla			24582062	0	0	0
ERX358443	ERS384432	Hair follicle	Dermal papilla			24582062	0	0	0
ERX358444	ERS384432	Hair follicle	Dermal papilla			24582062	0	0	0

## Sheet: hsa-miR-148a-3p
Experiment ID	Sample ID	Tissue	Description	Disease	Sex	PubMed ID	hsa-miR-148a-3p
SRX290626	SRS431788	Pancreas	Beta-cells (Beta3)		Female	23372846	59522.8
SRX345906	SRS477176	Nasopharynx	FFPE-Ctrl1			24393330	53953.9
SRX345916	SRS477184	Nasopharynx	FFPE-NPC1	Nasopharyngeal carcinoma		24393330	42278.2
SRX528317	SRS598162	Sperm	Adult donor 2			24835570	33531.8
SRX290576	SRS431738	Pancreas	Islets of Langerhans (Isl1)		Male	23372846	32458.2
SRX528316	SRS598161	Sperm	Adult donor 1			24835570	28366.6
SRX514979	SRS591048	Semen	Biopsy-proven cancer	Prostate cancer		24859988	27601.4
SRX345908	SRS477179	Nasopharynx	FFPE-Ctrl2			24393330	26843.4
SRX345905	SRS477175	Nasopharynx	FFPE-NPC3	Nasopharyngeal carcinoma		24393330	26024.4
SRX345917	SRS477185	Nasopharynx	FFPE-NPC2	Nasopharyngeal carcinoma		24393330	23914.2
SRX290617	SRS431779	Pancreas	Islets of Langerhans (Isl3)		Female	23372846	22895
SRX271415	SRS415822	Testis	1206014_AM7972, purchased from Ambion		Male	24981367	19921.5
SRX290623	SRS431785	Pancreas	Beta-cells (Beta2)		Female	23372846	19443.8
SRX271417	SRS415824	Testis	1203013_AM7972, purchased from Ambion		Male	24981367	15990.9
SRX666577	SRS671267	Blood	CD4+ NL4-3 Day 3			23592263	14167.6
SRX666575	SRS671265	Blood	CD4+ uninfected Day 3			23592263	14068.3
SRX514980	SRS591050	Semen	Control	Normal		24859988	13972.3
SRX290620	SRS431782	Pancreas	Beta-cells (Beta1)		Male	23372846	13697.8
SRX271416	SRS415823	Testis	OD36264-18 , obtained from NDRI		Male	24981367	12943.4
SRX666576	SRS671266	Blood	CD4+ BaL Day 3			23592263	12818.1
SRX262194	SRS409136	Plasma	father_trio_10	Normal	Male	23440203	12257
SRX513283	SRS590232	Breast	Tumor serum	Breast cancer		24904649	12231.3
SRX513284	SRS590233	Breast	Tumor tissue	Breast cancer		24904649	11790.2
SRX375455	SRS500629	Brain	ETMR3-rna	Embryonal brain tumor	Male	24316981	10768
SRX290601	SRS431763	Pancreas	Islets of Langerhans (Isl2)		Female	23372846	10477.4
SRX513285	SRS590234	Breast	Serum from healthy woman control	Normal		24904649	10257.5
SRX262181	SRS409123	Plasma	umbilical_trio_1	Normal	not_documented	23440203	9624
SRX262189	SRS409131	Plasma	umbilical_trio_11	Normal	not_documented	23440203	9162.9
SRX426123	SRS523362	Blood	hPBMCs exposed to E. coli DH5? (30 minutes)			http://www.ncbi.nlm.nih.gov/pubmed/?term=	9061.3
SRX375448	SRS499217	Brain	ETMR1-rna	Embryonal brain tumor	Female	24316981	8836.6
SRX262187	SRS409129	Plasma	umbilical_trio_8	Normal	not_documented	23440203	8471.5
SRX513286	SRS590235	Breast	Normal tissue	Normal		24904649	8313.5
SRX426125	SRS523362	Blood	hPBMCs exposed to E. coli DH5? (120 minutes)			http://www.ncbi.nlm.nih.gov/pubmed/?term=	7352.1
SRX353113	SRS481826	Liver	Cirrhotic liver	Liver cirrhosis		24009312	7173.2
SRX426124	SRS523362	Blood	hPBMCs exposed to E. coli DH5? (60 minutes)			http://www.ncbi.nlm.nih.gov/pubmed/?term=	6768.7
SRX375463	SRS500658	Brain	ETMR5-rna	Embryonal brain tumor	Female	24316981	5892.3
SRX262188	SRS409130	Plasma	umbilical_trio_10	Normal	not_documented	23440203	5864.6
SRX375462	SRS500656	Brain	ETMR4-rna	Embryonal brain tumor	Female	24316981	5733.7
SRX426475	SRS530036	Blood	hPBMCs exposed to F. tularensis Schu S4 (30, 60, and 120 min)			http://www.ncbi.nlm.nih.gov/pubmed/?term=	5635.8
SRX352359	SRS481324	Plasma	CFS1	Chronic fatigue syndrome	Female	25238588	5604.1
SRX426478	SRS530036	Blood	hPBMCs exposed to F. tularensis Schu S4 (120 minutes)			http://www.ncbi.nlm.nih.gov/pubmed/?term=	5232.5
SRX262180	SRS409122	Plasma	mother_trio_12	Normal	Female	23440203	4904
SRX262208	SRS409150	Serum	non_pregnant_5	Normal	Female	23440203	4460.5
SRX362358	SRS489183	Plasma	NF2	Non-fatigued	Female	25238588	4438.1
SRX262174	SRS402752	Plasma	mother_trio_1	Normal	Female	23440203	4207.7
SRX262204	SRS409146	Plasma	non_pregnant_1	Normal	Female	23440203	3999
SRX362352	SRS489176	Plasma	CFS2	Chronic fatigue syndrome	Female	25238588	3974.7
SRX345909	SRS477180	Serum	Sera-MalayCtrl			24393330	3599.4
DRX012361	DRS012098	Blood	CD19+ B Cells, donor2			24670764	3160.3
SRX666579	SRS671269	Blood	Macrophage ADA Day 27			23592263	3141.5
SRX262178	SRS409120	Plasma	mother_trio_8	Normal	Female	23440203	3058.3
SRX262192	SRS409134	Plasma	father_trio_6	Normal	Male	23440203	3053.5
SRX262175	SRS409117	Plasma	mother_trio_2	Normal	Female	23440203	3009
SRX349101	SRS481324	Plasma	CFS1	Chronic fatigue syndrome	Female	25238588	2886.5
DRX012362	DRS012099	Blood	CD19+ B Cells, donor3			24670764	2869.2
SRX262190	SRS409132	Plasma	umbilical_trio_12	Normal	not_documented	23440203	2853.6
SRX362361	SRS489186	Plasma	NF5	Non-fatigued	Female	25238588	2606.1
SRX375467	SRS500669	Brain	PNET3-rna	Primitive neuroectodermal tumor	Female	24316981	2583.2
SRX262183	SRS409125	Plasma	umbilical_trio_3	Normal	not_documented	23440203	2575.4
SRX262176	SRS409118	Plasma	mother_trio_3	Normal	Female	23440203	2569
SRX375450	SRS499241	Brain	ETMR2-rna	Embryonal brain tumor	Female	24316981	2316.5
SRX262195	SRS409137	Plasma	father_trio_12	Normal	Male	23440203	2243
SRX362357	SRS489182	Plasma	NF1	Non-fatigued	Female	25238588	2095.9
SRX362354	SRS489179	Plasma	CFS4	Chronic fatigue syndrome	Female	25238588	2071.9
SRX362356	SRS489181	Plasma	CFS6	Chronic fatigue syndrome	Female	25238588	1986.3
SRX262177	SRS409119	Plasma	mother_trio_6	Normal	Female	23440203	1936.3
SRX262182	SRS409124	Plasma	umbilical_trio_2	Normal	not_documented	23440203	1908.4
SRX262184	SRS409126	Plasma	umbilical_trio_4	Normal	not_documented	23440203	1888.4
SRX262179	SRS409121	Plasma	mother_trio_10	Normal	Female	23440203	1682
SRX362355	SRS489180	Plasma	CFS5	Chronic fatigue syndrome	Female	25238588	1630.6
SRX375466	SRS500667	Brain	PNET2-rna	Primitive neuroectodermal tumor	Male	24316981	1612.8
SRX362353	SRS489178	Plasma	CFS3	Chronic fatigue syndrome	Female	25238588	1503.1
DRX005948	DRS005867	Saliva	Whole Saliva	Normal		23302638	1456.9
SRX362359	SRS489184	Plasma	NF3	Non-fatigued	Female	25238588	1412.5
DRX005947	DRS005866	Saliva	Salivary exosome II	Normal		23302638	1328.1
SRX349069	SRS479660	Serum	Control	Normal		24349033	1323.7
SRX262202	SRS409144	Placenta	placenta_trio_11	Normal	not_documented	23440203	1318.8
DRX012360	DRS012097	Blood	CD19+ B Cells, donor1			24670764	1303.8
SRX262199	SRS409141	Placenta	placenta_trio_8	Normal	not_documented	23440203	1267.3
SRX349068	SRS479660	Serum	Patient infected TB	Tuberculosis		24349033	1246.2
SRX262185	SRS409127	Plasma	umbilical_trio_6	Normal	not_documented	23440203	1243
SRX362362	SRS489187	Plasma	NF6	Non-fatigued	Female	25238588	1142.8
SRX375452	SRS499468	Brain	ETMR2-R-rna	Embryonal brain tumor	Female	24316981	1142.5
SRX262193	SRS409135	Plasma	father_trio_8	Normal	Male	23440203	1102.7
SRX262198	SRS409140	Placenta	placenta_trio_7	Normal	not_documented	23440203	1081.1
SRX262205	SRS409147	Plasma	non_pregnant_2	Normal	Female	23440203	1070.1
DRX005946	DRS005865	Saliva	Salivary exosome I	Normal		23302638	1039.1
SRX375461	SRS500655	Brain	ETMR3-R-rna	Embryonal brain tumor	Male	24316981	988.3
SRX262201	SRS409143	Placenta	placenta_trio_10	Normal	not_documented	23440203	980.2
SRX373515	SRS500418	Serum	Individuals with latent TB infection (XQA)			24586438	938.4
SRX362360	SRS489185	Plasma	NF4	Non-fatigued	Female	25238588	862
SRX375141	SRS500419	Serum	Healthy BCG-inoculated individuals (XQB)	Normal		24586438	835.5
SRX666578	SRS671268	Blood	Macrophage uninfected Day 5			23592263	809.7
SRX262196	SRS409138	Placenta	placenta_trio_5	Normal	not_documented	23440203	789.6
SRX262200	SRS409142	Placenta	placenta_trio_9	Normal	not_documented	23440203	732.8
SRX262186	SRS409128	Plasma	umbilical_trio_7	Normal	not_documented	23440203	694.2
DRX011930	DRS011772	Bladder	Sample#6_bladder cancer_UC_G3_pT2_65yo_male	Bladder cancer	Male	24520312	641.9
SRX262203	SRS409145	Placenta	placenta_trio_12	Normal	not_documented	23440203	619
DRX011934	DRS011776	Bladder	Sample#10_bladder cancer_UC_G3_pT2_83yo_male	Bladder cancer	Male	24520312	519.9
DRX011931	DRS011773	Bladder	Sample#7_bladder cancer_UC>SCC_G3_pT3_76yo_male	Bladder cancer	Male	24520312	487.4

## Sheet: hsa-let-7i-5p
Experiment ID	Sample ID	Tissue	Description	Disease	Sex	PubMed ID	hsa-let-7i-5p
SRX262174	SRS402752	Plasma	mother_trio_1	Normal	Female	23440203	32374.6
SRX373515	SRS500418	Serum	Individuals with latent TB infection (XQA)			24586438	27818.9
SRX375143	SRS500421	Serum	Patients with active pulmonary tuberculosis (XQD)	Tuberculosis		24586438	24655.1
SRX345917	SRS477185	Nasopharynx	FFPE-NPC2	Nasopharyngeal carcinoma		24393330	23364.9
SRX262204	SRS409146	Plasma	non_pregnant_1	Normal	Female	23440203	19644.5
SRX345908	SRS477179	Nasopharynx	FFPE-Ctrl2			24393330	18366.5
SRX262178	SRS409120	Plasma	mother_trio_8	Normal	Female	23440203	18059.6
SRX262195	SRS409137	Plasma	father_trio_12	Normal	Male	23440203	17602.5
SRX262175	SRS409117	Plasma	mother_trio_2	Normal	Female	23440203	16967.6
SRX375141	SRS500419	Serum	Healthy BCG-inoculated individuals (XQB)	Normal		24586438	16059.4
SRX666577	SRS671267	Blood	CD4+ NL4-3 Day 3			23592263	15742.3
SRX513286	SRS590235	Breast	Normal tissue	Normal		24904649	15652.9
SRX386679	SRS510685	Blood	BGI-150p1			25074712	15457.5
SRX666575	SRS671265	Blood	CD4+ uninfected Day 3			23592263	15269
SRX375142	SRS500420	Serum	Healthy un-inoculated individuals (XQC)	Normal		24586438	14887.3
SRX426123	SRS523362	Blood	hPBMCs exposed to E. coli DH5? (30 minutes)			http://www.ncbi.nlm.nih.gov/pubmed/?term=	14357.2
SRX262206	SRS409148	Serum	non_pregnant_3	Normal	Female	23440203	13845.6
SRX262179	SRS409121	Plasma	mother_trio_10	Normal	Female	23440203	13652.2
SRX513284	SRS590233	Breast	Tumor tissue	Breast cancer		24904649	13443.5
SRX262192	SRS409134	Plasma	father_trio_6	Normal	Male	23440203	13362.6
SRX262176	SRS409118	Plasma	mother_trio_3	Normal	Female	23440203	12467.9
SRX290617	SRS431779	Pancreas	Islets of Langerhans (Isl3)		Female	23372846	12398.6
SRX345906	SRS477176	Nasopharynx	FFPE-Ctrl1			24393330	11586.2
SRX345916	SRS477184	Nasopharynx	FFPE-NPC1	Nasopharyngeal carcinoma		24393330	11511.9
SRX426475	SRS530036	Blood	hPBMCs exposed to F. tularensis Schu S4 (30, 60, and 120 min)			http://www.ncbi.nlm.nih.gov/pubmed/?term=	11435.2
SRX262193	SRS409135	Plasma	father_trio_8	Normal	Male	23440203	11084.4
SRX386680	SRS510686	Blood	BGI-150p2			25074712	11073.3
SRX514980	SRS591050	Semen	Control	Normal		24859988	10882.5
DRX012360	DRS012097	Blood	CD19+ B Cells, donor1			24670764	10674.4
SRX666576	SRS671266	Blood	CD4+ BaL Day 3			23592263	10541.3
SRX375467	SRS500669	Brain	PNET3-rna	Primitive neuroectodermal tumor	Female	24316981	10403.9
SRX386681	SRS510687	Blood	BGI-Fam150			25074712	10332.7
SRX318180	SRS455116	Blood	Peripheral blood mononuclear cells (Control_Ou)	Normal		24084574	10297.6
DRX012361	DRS012098	Blood	CD19+ B Cells, donor2			24670764	10236
SRX426124	SRS523362	Blood	hPBMCs exposed to E. coli DH5? (60 minutes)			http://www.ncbi.nlm.nih.gov/pubmed/?term=	10083.8
DRX012362	DRS012099	Blood	CD19+ B Cells, donor3			24670764	9996.5
SRX666578	SRS671268	Blood	Macrophage uninfected Day 5			23592263	9944.7
SRX426478	SRS530036	Blood	hPBMCs exposed to F. tularensis Schu S4 (120 minutes)			http://www.ncbi.nlm.nih.gov/pubmed/?term=	9299.3
SRX271415	SRS415822	Testis	1206014_AM7972, purchased from Ambion		Male	24981367	9007.1
SRX362358	SRS489183	Plasma	NF2	Non-fatigued	Female	25238588	8878.9
SRX426125	SRS523362	Blood	hPBMCs exposed to E. coli DH5? (120 minutes)			http://www.ncbi.nlm.nih.gov/pubmed/?term=	8747.3
SRX345905	SRS477175	Nasopharynx	FFPE-NPC3	Nasopharyngeal carcinoma		24393330	8548.9
SRX271417	SRS415824	Testis	1203013_AM7972, purchased from Ambion		Male	24981367	8393.1
SRX352359	SRS481324	Plasma	CFS1	Chronic fatigue syndrome	Female	25238588	8198.2
DRX011930	DRS011772	Bladder	Sample#6_bladder cancer_UC_G3_pT2_65yo_male	Bladder cancer	Male	24520312	8170.8
DRX011934	DRS011776	Bladder	Sample#10_bladder cancer_UC_G3_pT2_83yo_male	Bladder cancer	Male	24520312	8156.9
SRX513283	SRS590232	Breast	Tumor serum	Breast cancer		24904649	8104
SRX262177	SRS409119	Plasma	mother_trio_6	Normal	Female	23440203	7993.2
SRX290626	SRS431788	Pancreas	Beta-cells (Beta3)		Female	23372846	7873.3
SRX513285	SRS590234	Breast	Serum from healthy woman control	Normal		24904649	7802.8
SRX362352	SRS489176	Plasma	CFS2	Chronic fatigue syndrome	Female	25238588	7728.6
SRX271416	SRS415823	Testis	OD36264-18 , obtained from NDRI		Male	24981367	7076.8
DRX011931	DRS011773	Bladder	Sample#7_bladder cancer_UC>SCC_G3_pT3_76yo_male	Bladder cancer	Male	24520312	7014.3
SRX375466	SRS500667	Brain	PNET2-rna	Primitive neuroectodermal tumor	Male	24316981	6129.3
SRX290623	SRS431785	Pancreas	Beta-cells (Beta2)		Female	23372846	5683.9
DRX011926	DRS011768	Bladder	Sample#2_normal bladder epithelia	Normal		24520312	5503.3
DRX003170	DRS003336	Lung	Adenocarcinoma with bone metastasis	Cancer		23593434	5240.5
SRX262208	SRS409150	Serum	non_pregnant_5	Normal	Female	23440203	5112.9
SRX349101	SRS481324	Plasma	CFS1	Chronic fatigue syndrome	Female	25238588	5093
DRX011928	DRS011770	Bladder	Sample#4_normal bladder epithelia	Normal		24520312	4556.9
SRX375455	SRS500629	Brain	ETMR3-rna	Embryonal brain tumor	Male	24316981	4455.2
DRX011929	DRS011771	Bladder	Sample#5_normal bladder epithelia	Normal		24520312	4365.6
SRX375462	SRS500656	Brain	ETMR4-rna	Embryonal brain tumor	Female	24316981	4098.6
SRX362357	SRS489182	Plasma	NF1	Non-fatigued	Female	25238588	4098.4
DRX011927	DRS011769	Bladder	Sample#3_normal bladder epithelia	Normal		24520312	4058.6
SRX362361	SRS489186	Plasma	NF5	Non-fatigued	Female	25238588	3995.2
SRX318164	SRS455099	Blood	Peripheral blood mononuclear cells (osteopetrosis_Ou)	Osteopetrosis		24084574	3932.7
SRX345909	SRS477180	Serum	Sera-MalayCtrl			24393330	3824.4
SRX262188	SRS409130	Plasma	umbilical_trio_10	Normal	not_documented	23440203	3801.3
DRX003171	DRS003337	Lung	Adenocarcinoma without bone metastasis	Cancer		23593434	3645.8
SRX262182	SRS409124	Plasma	umbilical_trio_2	Normal	not_documented	23440203	3544.2
SRX362355	SRS489180	Plasma	CFS5	Chronic fatigue syndrome	Female	25238588	3384.2
SRX262183	SRS409125	Plasma	umbilical_trio_3	Normal	not_documented	23440203	3307
SRX375450	SRS499241	Brain	ETMR2-rna	Embryonal brain tumor	Female	24316981	3230
SRX353113	SRS481826	Liver	Cirrhotic liver	Liver cirrhosis		24009312	3206.6
SRX362362	SRS489187	Plasma	NF6	Non-fatigued	Female	25238588	3204.5
SRX375448	SRS499217	Brain	ETMR1-rna	Embryonal brain tumor	Female	24316981	3159.7
SRX262184	SRS409126	Plasma	umbilical_trio_4	Normal	not_documented	23440203	3159.5
DRX011925	DRS011767	Bladder	Sample#1_normal bladder epithelia	Normal		24520312	3145.1
SRX362356	SRS489181	Plasma	CFS6	Chronic fatigue syndrome	Female	25238588	3111.1
SRX362353	SRS489178	Plasma	CFS3	Chronic fatigue syndrome	Female	25238588	3062.5
SRX362359	SRS489184	Plasma	NF3	Non-fatigued	Female	25238588	3008.4
SRX362354	SRS489179	Plasma	CFS4	Chronic fatigue syndrome	Female	25238588	2884.9
DRX011933	DRS011775	Bladder	Sample#9_bladder cancer_UC_G2_pT2_92yo_female	Bladder cancer	Female	24520312	2796
SRX514979	SRS591048	Semen	Biopsy-proven cancer	Prostate cancer		24859988	2497.2
SRX362360	SRS489185	Plasma	NF4	Non-fatigued	Female	25238588	2494
DRX011932	DRS011774	Bladder	Sample#8_bladder cancer_UC_G2_pT2_91yo_male	Bladder cancer	Male	24520312	2429.1
SRX375452	SRS499468	Brain	ETMR2-R-rna	Embryonal brain tumor	Female	24316981	2413.4
SRX262207	SRS409149	Serum	non_pregnant_4	Normal	Female	23440203	2397.7
SRX262191	SRS409133	Plasma	father_trio_1	Normal	Male	23440203	2162
SRX262205	SRS409147	Plasma	non_pregnant_2	Normal	Female	23440203	2140.1
SRX666579	SRS671269	Blood	Macrophage ADA Day 27			23592263	2115
SRX262186	SRS409128	Plasma	umbilical_trio_7	Normal	not_documented	23440203	1732
SRX528317	SRS598162	Sperm	Adult donor 2			24835570	1408.5
SRX375463	SRS500658	Brain	ETMR5-rna	Embryonal brain tumor	Female	24316981	1402.8
SRX262201	SRS409143	Placenta	placenta_trio_10	Normal	not_documented	23440203	1281.1
SRX290576	SRS431738	Pancreas	Islets of Langerhans (Isl1)		Male	23372846	1175.6
SRX345913	SRS477183	Serum	Sera-MalayMid	Nasopharyngeal carcinoma		24393330	1064.5
SRX375464	SRS500666	Brain	PNET1-rna	Primitive neuroectodermal tumor	Male	24316981	1021
SRX349068	SRS479660	Serum	Patient infected TB	Tuberculosis		24349033	997.5

## Sheet: hsa-miR-30a-5p
Experiment ID	Sample ID	Tissue	Description	Disease	Sex	PubMed ID	hsa-miR-30a-5p
SRX514979	SRS591048	Semen	Biopsy-proven cancer	Prostate cancer		24859988	36199
SRX290576	SRS431738	Pancreas	Islets of Langerhans (Isl1)		Male	23372846	34321.5
SRX345908	SRS477179	Nasopharynx	FFPE-Ctrl2			24393330	30129
SRX345906	SRS477176	Nasopharynx	FFPE-Ctrl1			24393330	30006
SRX345917	SRS477185	Nasopharynx	FFPE-NPC2	Nasopharyngeal carcinoma		24393330	26635.6
SRX262202	SRS409144	Placenta	placenta_trio_11	Normal	not_documented	23440203	22023.1
SRX375455	SRS500629	Brain	ETMR3-rna	Embryonal brain tumor	Male	24316981	20621.4
SRX262203	SRS409145	Placenta	placenta_trio_12	Normal	not_documented	23440203	20150.1
SRX375143	SRS500421	Serum	Patients with active pulmonary tuberculosis (XQD)	Tuberculosis		24586438	19495.4
SRX353113	SRS481826	Liver	Cirrhotic liver	Liver cirrhosis		24009312	18411.6
SRX262189	SRS409131	Plasma	umbilical_trio_11	Normal	not_documented	23440203	17256.5
SRX262197	SRS409139	Placenta	placenta_trio_6	Normal	not_documented	23440203	15655.7
SRX262188	SRS409130	Plasma	umbilical_trio_10	Normal	not_documented	23440203	13894.6
SRX528316	SRS598161	Sperm	Adult donor 1			24835570	12687.5
SRX513285	SRS590234	Breast	Serum from healthy woman control	Normal		24904649	12212.1
SRX528317	SRS598162	Sperm	Adult donor 2			24835570	12182.1
SRX375462	SRS500656	Brain	ETMR4-rna	Embryonal brain tumor	Female	24316981	11928.8
SRX373515	SRS500418	Serum	Individuals with latent TB infection (XQA)			24586438	11186.8
SRX514980	SRS591050	Semen	Control	Normal		24859988	11169.9
SRX513283	SRS590232	Breast	Tumor serum	Breast cancer		24904649	10480.6
SRX375141	SRS500419	Serum	Healthy BCG-inoculated individuals (XQB)	Normal		24586438	10164.8
SRX375467	SRS500669	Brain	PNET3-rna	Primitive neuroectodermal tumor	Female	24316981	10156
SRX345905	SRS477175	Nasopharynx	FFPE-NPC3	Nasopharyngeal carcinoma		24393330	9674.9
SRX375448	SRS499217	Brain	ETMR1-rna	Embryonal brain tumor	Female	24316981	8082.2
SRX375463	SRS500658	Brain	ETMR5-rna	Embryonal brain tumor	Female	24316981	7430.7
SRX262196	SRS409138	Placenta	placenta_trio_5	Normal	not_documented	23440203	7341.2
SRX345916	SRS477184	Nasopharynx	FFPE-NPC1	Nasopharyngeal carcinoma		24393330	6424.9
SRX271417	SRS415824	Testis	1203013_AM7972, purchased from Ambion		Male	24981367	6406
SRX262180	SRS409122	Plasma	mother_trio_12	Normal	Female	23440203	6309.4
SRX262200	SRS409142	Placenta	placenta_trio_9	Normal	not_documented	23440203	6275.2
SRX375450	SRS499241	Brain	ETMR2-rna	Embryonal brain tumor	Female	24316981	6031.3
SRX290617	SRS431779	Pancreas	Islets of Langerhans (Isl3)		Female	23372846	5959.5
SRX271415	SRS415822	Testis	1206014_AM7972, purchased from Ambion		Male	24981367	5303.4
SRX513284	SRS590233	Breast	Tumor tissue	Breast cancer		24904649	5264.3
SRX271416	SRS415823	Testis	OD36264-18 , obtained from NDRI		Male	24981367	4781.2
DRX011927	DRS011769	Bladder	Sample#3_normal bladder epithelia	Normal		24520312	4009.7
SRX262183	SRS409125	Plasma	umbilical_trio_3	Normal	not_documented	23440203	3980.1
DRX005948	DRS005867	Saliva	Whole Saliva	Normal		23302638	3898.9
DRX011926	DRS011768	Bladder	Sample#2_normal bladder epithelia	Normal		24520312	3457.8
DRX005946	DRS005865	Saliva	Salivary exosome I	Normal		23302638	3290.4
SRX513286	SRS590235	Breast	Normal tissue	Normal		24904649	3269.7
SRX290601	SRS431763	Pancreas	Islets of Langerhans (Isl2)		Female	23372846	3083.1
DRX011928	DRS011770	Bladder	Sample#4_normal bladder epithelia	Normal		24520312	3021.9
SRX262208	SRS409150	Serum	non_pregnant_5	Normal	Female	23440203	3000.9
SRX349068	SRS479660	Serum	Patient infected TB	Tuberculosis		24349033	2928.4
DRX011925	DRS011767	Bladder	Sample#1_normal bladder epithelia	Normal		24520312	2900.8
DRX012362	DRS012099	Blood	CD19+ B Cells, donor3			24670764	2853.3
SRX262184	SRS409126	Plasma	umbilical_trio_4	Normal	not_documented	23440203	2796.3
DRX005947	DRS005866	Saliva	Salivary exosome II	Normal		23302638	2756.4
SRX375142	SRS500420	Serum	Healthy un-inoculated individuals (XQC)	Normal		24586438	2717.2
DRX011929	DRS011771	Bladder	Sample#5_normal bladder epithelia	Normal		24520312	2712
DRX012360	DRS012097	Blood	CD19+ B Cells, donor1			24670764	2687.7
SRX352359	SRS481324	Plasma	CFS1	Chronic fatigue syndrome	Female	25238588	2654.8
DRX011931	DRS011773	Bladder	Sample#7_bladder cancer_UC>SCC_G3_pT3_76yo_male	Bladder cancer	Male	24520312	2541.8
SRX375466	SRS500667	Brain	PNET2-rna	Primitive neuroectodermal tumor	Male	24316981	2504
SRX262179	SRS409121	Plasma	mother_trio_10	Normal	Female	23440203	2354.8
SRX290626	SRS431788	Pancreas	Beta-cells (Beta3)		Female	23372846	2278.1
SRX262187	SRS409129	Plasma	umbilical_trio_8	Normal	not_documented	23440203	2185.1
SRX262174	SRS402752	Plasma	mother_trio_1	Normal	Female	23440203	2128.6
SRX375461	SRS500655	Brain	ETMR3-R-rna	Embryonal brain tumor	Male	24316981	2092.6
SRX362352	SRS489176	Plasma	CFS2	Chronic fatigue syndrome	Female	25238588	1788.9
SRX375452	SRS499468	Brain	ETMR2-R-rna	Embryonal brain tumor	Female	24316981	1752.3
SRX290623	SRS431785	Pancreas	Beta-cells (Beta2)		Female	23372846	1622.3
DRX012361	DRS012098	Blood	CD19+ B Cells, donor2			24670764	1567.2
DRX011930	DRS011772	Bladder	Sample#6_bladder cancer_UC_G3_pT2_65yo_male	Bladder cancer	Male	24520312	1451.5
SRX349101	SRS481324	Plasma	CFS1	Chronic fatigue syndrome	Female	25238588	1272.3
SRX362358	SRS489183	Plasma	NF2	Non-fatigued	Female	25238588	1242.4
SRX349069	SRS479660	Serum	Control	Normal		24349033	1060.7
SRX362357	SRS489182	Plasma	NF1	Non-fatigued	Female	25238588	1042.9
SRX362359	SRS489184	Plasma	NF3	Non-fatigued	Female	25238588	1031.4
SRX362355	SRS489180	Plasma	CFS5	Chronic fatigue syndrome	Female	25238588	986.8
DRX011933	DRS011775	Bladder	Sample#9_bladder cancer_UC_G2_pT2_92yo_female	Bladder cancer	Female	24520312	977
SRX375464	SRS500666	Brain	PNET1-rna	Primitive neuroectodermal tumor	Male	24316981	930.8
SRX345909	SRS477180	Serum	Sera-MalayCtrl			24393330	899.9
SRX362354	SRS489179	Plasma	CFS4	Chronic fatigue syndrome	Female	25238588	894.4
SRX362353	SRS489178	Plasma	CFS3	Chronic fatigue syndrome	Female	25238588	886.6
SRX362362	SRS489187	Plasma	NF6	Non-fatigued	Female	25238588	870.5
SRX362356	SRS489181	Plasma	CFS6	Chronic fatigue syndrome	Female	25238588	827.5
SRX290620	SRS431782	Pancreas	Beta-cells (Beta1)		Male	23372846	771.1
SRX362361	SRS489186	Plasma	NF5	Non-fatigued	Female	25238588	720.1
SRX362360	SRS489185	Plasma	NF4	Non-fatigued	Female	25238588	718
SRX262175	SRS409117	Plasma	mother_trio_2	Normal	Female	23440203	668.7
DRX011934	DRS011776	Bladder	Sample#10_bladder cancer_UC_G3_pT2_83yo_male	Bladder cancer	Male	24520312	565.6
SRX262182	SRS409124	Plasma	umbilical_trio_2	Normal	not_documented	23440203	545.3
SRX262195	SRS409137	Plasma	father_trio_12	Normal	Male	23440203	475.3
SRX262181	SRS409123	Plasma	umbilical_trio_1	Normal	not_documented	23440203	344.6
SRX262201	SRS409143	Placenta	placenta_trio_10	Normal	not_documented	23440203	307.1
SRX386679	SRS510685	Blood	BGI-150p1			25074712	299.7
SRX426123	SRS523362	Blood	hPBMCs exposed to E. coli DH5? (30 minutes)			http://www.ncbi.nlm.nih.gov/pubmed/?term=	244.9
SRX426125	SRS523362	Blood	hPBMCs exposed to E. coli DH5? (120 minutes)			http://www.ncbi.nlm.nih.gov/pubmed/?term=	236.7
SRX386680	SRS510686	Blood	BGI-150p2			25074712	229.8
SRX262190	SRS409132	Plasma	umbilical_trio_12	Normal	not_documented	23440203	226.2
SRX262204	SRS409146	Plasma	non_pregnant_1	Normal	Female	23440203	218.2
SRX426124	SRS523362	Blood	hPBMCs exposed to E. coli DH5? (60 minutes)			http://www.ncbi.nlm.nih.gov/pubmed/?term=	213
DRX011932	DRS011774	Bladder	Sample#8_bladder cancer_UC_G2_pT2_91yo_male	Bladder cancer	Male	24520312	207.7
SRX426478	SRS530036	Blood	hPBMCs exposed to F. tularensis Schu S4 (120 minutes)			http://www.ncbi.nlm.nih.gov/pubmed/?term=	202.5
SRX386681	SRS510687	Blood	BGI-Fam150			25074712	201.8
SRX426475	SRS530036	Blood	hPBMCs exposed to F. tularensis Schu S4 (30, 60, and 120 min)			http://www.ncbi.nlm.nih.gov/pubmed/?term=	182.9
SRX262206	SRS409148	Serum	non_pregnant_3	Normal	Female	23440203	180.6
SRX262176	SRS409118	Plasma	mother_trio_3	Normal	Female	23440203	141.4

## Sheet: hsa-let-7g-5p
Experiment ID	Sample ID	Tissue	Description	Disease	Sex	PubMed ID	hsa-let-7g-5p
SRX386681	SRS510687	Blood	BGI-Fam150			25074712	136376
SRX386680	SRS510686	Blood	BGI-150p2			25074712	114430
SRX386679	SRS510685	Blood	BGI-150p1			25074712	111332
SRX318180	SRS455116	Blood	Peripheral blood mononuclear cells (Control_Ou)	Normal		24084574	52023.7
DRX003171	DRS003337	Lung	Adenocarcinoma without bone metastasis	Cancer		23593434	47341.8
DRX003170	DRS003336	Lung	Adenocarcinoma with bone metastasis	Cancer		23593434	46966.4
DRX011930	DRS011772	Bladder	Sample#6_bladder cancer_UC_G3_pT2_65yo_male	Bladder cancer	Male	24520312	43482.5
SRX262174	SRS402752	Plasma	mother_trio_1	Normal	Female	23440203	33216.2
SRX426123	SRS523362	Blood	hPBMCs exposed to E. coli DH5? (30 minutes)			http://www.ncbi.nlm.nih.gov/pubmed/?term=	32782.6
SRX262205	SRS409147	Plasma	non_pregnant_2	Normal	Female	23440203	29565.6
DRX012362	DRS012099	Blood	CD19+ B Cells, donor3			24670764	28958.3
DRX012361	DRS012098	Blood	CD19+ B Cells, donor2			24670764	28916.2
DRX012360	DRS012097	Blood	CD19+ B Cells, donor1			24670764	27638.6
SRX426124	SRS523362	Blood	hPBMCs exposed to E. coli DH5? (60 minutes)			http://www.ncbi.nlm.nih.gov/pubmed/?term=	26217.6
DRX011932	DRS011774	Bladder	Sample#8_bladder cancer_UC_G2_pT2_91yo_male	Bladder cancer	Male	24520312	24932.9
SRX426478	SRS530036	Blood	hPBMCs exposed to F. tularensis Schu S4 (120 minutes)			http://www.ncbi.nlm.nih.gov/pubmed/?term=	24503.2
SRX426125	SRS523362	Blood	hPBMCs exposed to E. coli DH5? (120 minutes)			http://www.ncbi.nlm.nih.gov/pubmed/?term=	23933.4
SRX426475	SRS530036	Blood	hPBMCs exposed to F. tularensis Schu S4 (30, 60, and 120 min)			http://www.ncbi.nlm.nih.gov/pubmed/?term=	22938.4
SRX318164	SRS455099	Blood	Peripheral blood mononuclear cells (osteopetrosis_Ou)	Osteopetrosis		24084574	21899.5
SRX375142	SRS500420	Serum	Healthy un-inoculated individuals (XQC)	Normal		24586438	21805.9
DRX011931	DRS011773	Bladder	Sample#7_bladder cancer_UC>SCC_G3_pT3_76yo_male	Bladder cancer	Male	24520312	21012.2
SRX262175	SRS409117	Plasma	mother_trio_2	Normal	Female	23440203	20519.9
SRX262195	SRS409137	Plasma	father_trio_12	Normal	Male	23440203	18415.4
DRX011934	DRS011776	Bladder	Sample#10_bladder cancer_UC_G3_pT2_83yo_male	Bladder cancer	Male	24520312	18148
DRX011929	DRS011771	Bladder	Sample#5_normal bladder epithelia	Normal		24520312	18076.4
SRX666575	SRS671265	Blood	CD4+ uninfected Day 3			23592263	16530.8
DRX011927	DRS011769	Bladder	Sample#3_normal bladder epithelia	Normal		24520312	16368.1
SRX262176	SRS409118	Plasma	mother_trio_3	Normal	Female	23440203	16347.7
DRX011925	DRS011767	Bladder	Sample#1_normal bladder epithelia	Normal		24520312	15887.3
DRX011926	DRS011768	Bladder	Sample#2_normal bladder epithelia	Normal		24520312	15823.4
SRX373515	SRS500418	Serum	Individuals with latent TB infection (XQA)			24586438	15293.2
DRX011933	DRS011775	Bladder	Sample#9_bladder cancer_UC_G2_pT2_92yo_female	Bladder cancer	Female	24520312	15215.9
SRX375143	SRS500421	Serum	Patients with active pulmonary tuberculosis (XQD)	Tuberculosis		24586438	15155.3
SRX262178	SRS409120	Plasma	mother_trio_8	Normal	Female	23440203	14608.8
SRX271417	SRS415824	Testis	1203013_AM7972, purchased from Ambion		Male	24981367	14315.3
SRX345916	SRS477184	Nasopharynx	FFPE-NPC1	Nasopharyngeal carcinoma		24393330	14110
SRX262204	SRS409146	Plasma	non_pregnant_1	Normal	Female	23440203	14074
SRX271416	SRS415823	Testis	OD36264-18 , obtained from NDRI		Male	24981367	13901
SRX666576	SRS671266	Blood	CD4+ BaL Day 3			23592263	13176.9
DRX011928	DRS011770	Bladder	Sample#4_normal bladder epithelia	Normal		24520312	13008.6
SRX271415	SRS415822	Testis	1206014_AM7972, purchased from Ambion		Male	24981367	12833.5
SRX262177	SRS409119	Plasma	mother_trio_6	Normal	Female	23440203	12652.3
SRX262186	SRS409128	Plasma	umbilical_trio_7	Normal	not_documented	23440203	12201.7
SRX513284	SRS590233	Breast	Tumor tissue	Breast cancer		24904649	11783
SRX513286	SRS590235	Breast	Normal tissue	Normal		24904649	11684.1
SRX666577	SRS671267	Blood	CD4+ NL4-3 Day 3			23592263	11667.9
SRX375141	SRS500419	Serum	Healthy BCG-inoculated individuals (XQB)	Normal		24586438	11289.2
SRX262179	SRS409121	Plasma	mother_trio_10	Normal	Female	23440203	11152.6
SRX262192	SRS409134	Plasma	father_trio_6	Normal	Male	23440203	9555.8
SRX345917	SRS477185	Nasopharynx	FFPE-NPC2	Nasopharyngeal carcinoma		24393330	9525.9
SRX513283	SRS590232	Breast	Tumor serum	Breast cancer		24904649	9036.6
SRX528317	SRS598162	Sperm	Adult donor 2			24835570	8828.1
SRX262193	SRS409135	Plasma	father_trio_8	Normal	Male	23440203	8606.3
SRX375466	SRS500667	Brain	PNET2-rna	Primitive neuroectodermal tumor	Male	24316981	8356.6
SRX666578	SRS671268	Blood	Macrophage uninfected Day 5			23592263	7811.4
SRX262188	SRS409130	Plasma	umbilical_trio_10	Normal	not_documented	23440203	7590.2
SRX513285	SRS590234	Breast	Serum from healthy woman control	Normal		24904649	7582
SRX345908	SRS477179	Nasopharynx	FFPE-Ctrl2			24393330	7056.2
SRX290617	SRS431779	Pancreas	Islets of Langerhans (Isl3)		Female	23372846	6490.7
SRX262206	SRS409148	Serum	non_pregnant_3	Normal	Female	23440203	6080
SRX290626	SRS431788	Pancreas	Beta-cells (Beta3)		Female	23372846	6034.8
SRX514980	SRS591050	Semen	Control	Normal		24859988	5437.9
SRX528316	SRS598161	Sperm	Adult donor 1			24835570	5037.3
SRX345906	SRS477176	Nasopharynx	FFPE-Ctrl1			24393330	4970.6
SRX345905	SRS477175	Nasopharynx	FFPE-NPC3	Nasopharyngeal carcinoma		24393330	4617.4
SRX375467	SRS500669	Brain	PNET3-rna	Primitive neuroectodermal tumor	Female	24316981	4450.7
SRX262180	SRS409122	Plasma	mother_trio_12	Normal	Female	23440203	4306
SRX262182	SRS409124	Plasma	umbilical_trio_2	Normal	not_documented	23440203	4089.4
SRX262191	SRS409133	Plasma	father_trio_1	Normal	Male	23440203	3835.1
SRX262200	SRS409142	Placenta	placenta_trio_9	Normal	not_documented	23440203	3781.5
SRX262189	SRS409131	Plasma	umbilical_trio_11	Normal	not_documented	23440203	3767.3
SRX290623	SRS431785	Pancreas	Beta-cells (Beta2)		Female	23372846	3759.9
SRX262183	SRS409125	Plasma	umbilical_trio_3	Normal	not_documented	23440203	3731.3
SRX262208	SRS409150	Serum	non_pregnant_5	Normal	Female	23440203	3599.4
SRX353113	SRS481826	Liver	Cirrhotic liver	Liver cirrhosis		24009312	3518.1
SRX262185	SRS409127	Plasma	umbilical_trio_6	Normal	not_documented	23440203	3404.5
SRX262196	SRS409138	Placenta	placenta_trio_5	Normal	not_documented	23440203	3322.6
SRX290620	SRS431782	Pancreas	Beta-cells (Beta1)		Male	23372846	3300.9
SRX349068	SRS479660	Serum	Patient infected TB	Tuberculosis		24349033	3281.8
SRX349069	SRS479660	Serum	Control	Normal		24349033	3230.7
SRX375455	SRS500629	Brain	ETMR3-rna	Embryonal brain tumor	Male	24316981	3105.1
SRX290576	SRS431738	Pancreas	Islets of Langerhans (Isl1)		Male	23372846	2954
SRX375462	SRS500656	Brain	ETMR4-rna	Embryonal brain tumor	Female	24316981	2918.9
SRX262197	SRS409139	Placenta	placenta_trio_6	Normal	not_documented	23440203	2902.4
SRX514979	SRS591048	Semen	Biopsy-proven cancer	Prostate cancer		24859988	2863
SRX262184	SRS409126	Plasma	umbilical_trio_4	Normal	not_documented	23440203	2778.2
SRX290601	SRS431763	Pancreas	Islets of Langerhans (Isl2)		Female	23372846	2744
SRX666579	SRS671269	Blood	Macrophage ADA Day 27			23592263	2667.1
DRX005948	DRS005867	Saliva	Whole Saliva	Normal		23302638	2566.9
SRX352359	SRS481324	Plasma	CFS1	Chronic fatigue syndrome	Female	25238588	2230.4
SRX362358	SRS489183	Plasma	NF2	Non-fatigued	Female	25238588	2128.5
SRX262201	SRS409143	Placenta	placenta_trio_10	Normal	not_documented	23440203	2122.2
SRX362352	SRS489176	Plasma	CFS2	Chronic fatigue syndrome	Female	25238588	2053
SRX375463	SRS500658	Brain	ETMR5-rna	Embryonal brain tumor	Female	24316981	1474.4
DRX005947	DRS005866	Saliva	Salivary exosome II	Normal		23302638	1440.9
SRX375448	SRS499217	Brain	ETMR1-rna	Embryonal brain tumor	Female	24316981	1402.8
SRX375452	SRS499468	Brain	ETMR2-R-rna	Embryonal brain tumor	Female	24316981	1150.4
SRX349101	SRS481324	Plasma	CFS1	Chronic fatigue syndrome	Female	25238588	1083.6
SRX262187	SRS409129	Plasma	umbilical_trio_8	Normal	not_documented	23440203	991.1
DRX005946	DRS005865	Saliva	Salivary exosome I	Normal		23302638	991

## Sheet: hsa-miR-143-3p
Experiment ID	Sample ID	Tissue	Description	Disease	Sex	PubMed ID	hsa-miR-143-3p
SRX290601	SRS431763	Pancreas	Islets of Langerhans (Isl2)		Female	23372846	279169
SRX271415	SRS415822	Testis	1206014_AM7972, purchased from Ambion		Male	24981367	237151
SRX290576	SRS431738	Pancreas	Islets of Langerhans (Isl1)		Male	23372846	186579
SRX345906	SRS477176	Nasopharynx	FFPE-Ctrl1			24393330	164867
SRX345908	SRS477179	Nasopharynx	FFPE-Ctrl2			24393330	112958
SRX271416	SRS415823	Testis	OD36264-18 , obtained from NDRI		Male	24981367	100263
SRX353113	SRS481826	Liver	Cirrhotic liver	Liver cirrhosis		24009312	93940.6
SRX271417	SRS415824	Testis	1203013_AM7972, purchased from Ambion		Male	24981367	92142.8
SRX345917	SRS477185	Nasopharynx	FFPE-NPC2	Nasopharyngeal carcinoma		24393330	59575.9
SRX290620	SRS431782	Pancreas	Beta-cells (Beta1)		Male	23372846	56323.8
SRX345905	SRS477175	Nasopharynx	FFPE-NPC3	Nasopharyngeal carcinoma		24393330	52608.6
DRX011929	DRS011771	Bladder	Sample#5_normal bladder epithelia	Normal		24520312	43801.6
SRX290617	SRS431779	Pancreas	Islets of Langerhans (Isl3)		Female	23372846	41258.4
DRX011927	DRS011769	Bladder	Sample#3_normal bladder epithelia	Normal		24520312	39219.6
DRX011925	DRS011767	Bladder	Sample#1_normal bladder epithelia	Normal		24520312	38250
DRX005948	DRS005867	Saliva	Whole Saliva	Normal		23302638	37781.8
DRX011926	DRS011768	Bladder	Sample#2_normal bladder epithelia	Normal		24520312	37148.1
DRX005946	DRS005865	Saliva	Salivary exosome I	Normal		23302638	35905.3
SRX345916	SRS477184	Nasopharynx	FFPE-NPC1	Nasopharyngeal carcinoma		24393330	32492.1
DRX011928	DRS011770	Bladder	Sample#4_normal bladder epithelia	Normal		24520312	28986.9
SRX375141	SRS500419	Serum	Healthy BCG-inoculated individuals (XQB)	Normal		24586438	27152.5
SRX375448	SRS499217	Brain	ETMR1-rna	Embryonal brain tumor	Female	24316981	22494.7
DRX005947	DRS005866	Saliva	Salivary exosome II	Normal		23302638	21775.9
SRX373515	SRS500418	Serum	Individuals with latent TB infection (XQA)			24586438	17237.1
SRX513285	SRS590234	Breast	Serum from healthy woman control	Normal		24904649	16852.2
SRX513283	SRS590232	Breast	Tumor serum	Breast cancer		24904649	16303.1
SRX375143	SRS500421	Serum	Patients with active pulmonary tuberculosis (XQD)	Tuberculosis		24586438	16064.9
SRX262189	SRS409131	Plasma	umbilical_trio_11	Normal	not_documented	23440203	11569.1
SRX514980	SRS591050	Semen	Control	Normal		24859988	11195.6
SRX375462	SRS500656	Brain	ETMR4-rna	Embryonal brain tumor	Female	24316981	10744.6
SRX262183	SRS409125	Plasma	umbilical_trio_3	Normal	not_documented	23440203	10711.2
SRX262202	SRS409144	Placenta	placenta_trio_11	Normal	not_documented	23440203	10550
SRX349069	SRS479660	Serum	Control	Normal		24349033	10356.2
SRX375142	SRS500420	Serum	Healthy un-inoculated individuals (XQC)	Normal		24586438	10119.5
SRX349068	SRS479660	Serum	Patient infected TB	Tuberculosis		24349033	10067.4
SRX375450	SRS499241	Brain	ETMR2-rna	Embryonal brain tumor	Female	24316981	8682.2
SRX352359	SRS481324	Plasma	CFS1	Chronic fatigue syndrome	Female	25238588	8105.5
SRX375463	SRS500658	Brain	ETMR5-rna	Embryonal brain tumor	Female	24316981	7722.4
SRX375455	SRS500629	Brain	ETMR3-rna	Embryonal brain tumor	Male	24316981	6887.4
SRX513284	SRS590233	Breast	Tumor tissue	Breast cancer		24904649	6874
SRX375467	SRS500669	Brain	PNET3-rna	Primitive neuroectodermal tumor	Female	24316981	6870.3
SRX262201	SRS409143	Placenta	placenta_trio_10	Normal	not_documented	23440203	6558.4
SRX513286	SRS590235	Breast	Normal tissue	Normal		24904649	6261.2
SRX262179	SRS409121	Plasma	mother_trio_10	Normal	Female	23440203	6223.4
DRX011930	DRS011772	Bladder	Sample#6_bladder cancer_UC_G3_pT2_65yo_male	Bladder cancer	Male	24520312	5994.4
SRX362356	SRS489181	Plasma	CFS6	Chronic fatigue syndrome	Female	25238588	5947.2
SRX262203	SRS409145	Placenta	placenta_trio_12	Normal	not_documented	23440203	5004.6
SRX375466	SRS500667	Brain	PNET2-rna	Primitive neuroectodermal tumor	Male	24316981	4570.5
SRX362352	SRS489176	Plasma	CFS2	Chronic fatigue syndrome	Female	25238588	4365.1
SRX262199	SRS409141	Placenta	placenta_trio_8	Normal	not_documented	23440203	4342.7
SRX262198	SRS409140	Placenta	placenta_trio_7	Normal	not_documented	23440203	4082.7
DRX011933	DRS011775	Bladder	Sample#9_bladder cancer_UC_G2_pT2_92yo_female	Bladder cancer	Female	24520312	4074.3
SRX375452	SRS499468	Brain	ETMR2-R-rna	Embryonal brain tumor	Female	24316981	3918.6
SRX290623	SRS431785	Pancreas	Beta-cells (Beta2)		Female	23372846	3897.1
SRX262181	SRS409123	Plasma	umbilical_trio_1	Normal	not_documented	23440203	3542
SRX349101	SRS481324	Plasma	CFS1	Chronic fatigue syndrome	Female	25238588	3439.5
SRX262184	SRS409126	Plasma	umbilical_trio_4	Normal	not_documented	23440203	2977.9
SRX362357	SRS489182	Plasma	NF1	Non-fatigued	Female	25238588	2828.5
SRX262197	SRS409139	Placenta	placenta_trio_6	Normal	not_documented	23440203	2798.1
SRX514979	SRS591048	Semen	Biopsy-proven cancer	Prostate cancer		24859988	2725.1
SRX362359	SRS489184	Plasma	NF3	Non-fatigued	Female	25238588	2601.1
SRX528317	SRS598162	Sperm	Adult donor 2			24835570	2583.1
SRX262180	SRS409122	Plasma	mother_trio_12	Normal	Female	23440203	2571.6
SRX362355	SRS489180	Plasma	CFS5	Chronic fatigue syndrome	Female	25238588	2564.5
DRX011934	DRS011776	Bladder	Sample#10_bladder cancer_UC_G3_pT2_83yo_male	Bladder cancer	Male	24520312	2269.9
SRX262196	SRS409138	Placenta	placenta_trio_5	Normal	not_documented	23440203	2253.2
SRX262208	SRS409150	Serum	non_pregnant_5	Normal	Female	23440203	2201.7
SRX362361	SRS489186	Plasma	NF5	Non-fatigued	Female	25238588	2020.3
SRX362354	SRS489179	Plasma	CFS4	Chronic fatigue syndrome	Female	25238588	2012.2
SRX262200	SRS409142	Placenta	placenta_trio_9	Normal	not_documented	23440203	2011.9
DRX011931	DRS011773	Bladder	Sample#7_bladder cancer_UC>SCC_G3_pT3_76yo_male	Bladder cancer	Male	24520312	1996.4
SRX362358	SRS489183	Plasma	NF2	Non-fatigued	Female	25238588	1992
SRX345909	SRS477180	Serum	Sera-MalayCtrl			24393330	1917.6
SRX362353	SRS489178	Plasma	CFS3	Chronic fatigue syndrome	Female	25238588	1882.9
SRX290626	SRS431788	Pancreas	Beta-cells (Beta3)		Female	23372846	1868
SRX528316	SRS598161	Sperm	Adult donor 1			24835570	1708.9
DRX003171	DRS003337	Lung	Adenocarcinoma without bone metastasis	Cancer		23593434	1673.5
SRX262174	SRS402752	Plasma	mother_trio_1	Normal	Female	23440203	1386.1
SRX375461	SRS500655	Brain	ETMR3-R-rna	Embryonal brain tumor	Male	24316981	1151.7
SRX262190	SRS409132	Plasma	umbilical_trio_12	Normal	not_documented	23440203	1139.7
DRX003170	DRS003336	Lung	Adenocarcinoma with bone metastasis	Cancer		23593434	1112.7
SRX262207	SRS409149	Serum	non_pregnant_4	Normal	Female	23440203	1110
SRX362362	SRS489187	Plasma	NF6	Non-fatigued	Female	25238588	1020
DRX011932	DRS011774	Bladder	Sample#8_bladder cancer_UC_G2_pT2_91yo_male	Bladder cancer	Male	24520312	929.9
SRX262176	SRS409118	Plasma	mother_trio_3	Normal	Female	23440203	895.6
SRX262175	SRS409117	Plasma	mother_trio_2	Normal	Female	23440203	835.8
SRX362360	SRS489185	Plasma	NF4	Non-fatigued	Female	25238588	662.4
SRX426123	SRS523362	Blood	hPBMCs exposed to E. coli DH5? (30 minutes)			http://www.ncbi.nlm.nih.gov/pubmed/?term=	600.8
SRX262195	SRS409137	Plasma	father_trio_12	Normal	Male	23440203	554.6
SRX262182	SRS409124	Plasma	umbilical_trio_2	Normal	not_documented	23440203	545.3
SRX262206	SRS409148	Serum	non_pregnant_3	Normal	Female	23440203	511.7
SRX426475	SRS530036	Blood	hPBMCs exposed to F. tularensis Schu S4 (30, 60, and 120 min)			http://www.ncbi.nlm.nih.gov/pubmed/?term=	503.9
SRX426478	SRS530036	Blood	hPBMCs exposed to F. tularensis Schu S4 (120 minutes)			http://www.ncbi.nlm.nih.gov/pubmed/?term=	485
SRX426125	SRS523362	Blood	hPBMCs exposed to E. coli DH5? (120 minutes)			http://www.ncbi.nlm.nih.gov/pubmed/?term=	440
SRX426124	SRS523362	Blood	hPBMCs exposed to E. coli DH5? (60 minutes)			http://www.ncbi.nlm.nih.gov/pubmed/?term=	427
SRX262188	SRS409130	Plasma	umbilical_trio_10	Normal	not_documented	23440203	423.5
SRX262205	SRS409147	Plasma	non_pregnant_2	Normal	Female	23440203	317.1
SRX386679	SRS510685	Blood	BGI-150p1			25074712	279.9
DRX012360	DRS012097	Blood	CD19+ B Cells, donor1			24670764	248.4
SRX386681	SRS510687	Blood	BGI-Fam150			25074712	243.2
Showing 1 to 100 of 135 entries
