# Supplementary material for: Small RNA-seq analysis of single porcine blastocysts revealed that maternal estradiol-17beta exposure does not affect miRNA isoform (isomiR) expression
Source: BMC Genomics. 2018 Aug 6;19:590. doi: 10.1186/s12864-018-4954-9 (PMC6090871; doi:10.1186/s12864-018-4954-9)
Supplement: Supplementary file 13 — Table S7. Expression level embryo Day 10 in percentage. (XLSX 7 kb) [file 12864_2018_4954_MOESM13_ESM.xlsx]

## Sheet: Sheet1
BLAST database	Set expectation value cutoff	Output format	No of threads	Advanced Options	Filter out low complexity regions (with DUST)	Query strand(s) to search against database/subject	Maximum hits to show	Percent identity cutoff	Word size for wordfinder algorithm	Perform ungapped alignment only?	Should the query and subject defline(s) be parsed?	Restrict search of database to a given set of ID's	Minimum query coverage per hsp	Filtering in Excel	locate mature form
porcine mature miRNA	0.1	ext	2	advanced	False	Plus	5	100	0	False	False	none	0	OR(query length=alignment length; subject length=alignment length)	AND(query length=alignment length; subject length=alignment length)	more see README
bovine and human mature miRNA	0.1	ext	2	advanced	False	Plus	5	100	0	False	False	none	0	OR(query length=alignment length; subject length=alignment length)	AND(query length=alignment length; subject length=alignment length)
porcine, bovine, and human precursor	0.1	ext	2	advanced	False	Plus	5	100	0	False	False	none	95	filter for highest bit score + query length=alignment length
porcine Ensembl precursor	0.1	ext	2	advanced	False	Plus	5	100	0	False	False	none	95	sort hits on sequence+target accession
porcine Refseq transcripts	0.1	ext	2	advanced	False	Plus	5	100	0	False	False	none	100	sort hits on sequence+target accession
porcine tRNA	0.1	ext	2	advanced	False	Plus	5	100	0	False	False	none	95	filter for highest bit score	sort hits on sequence+target accession
porcine piRNA clusters	0.1	ext	2	advanced	False	Plus	5	100	0	False	False	none	100	sort hits on sequence+target accession
Hsa Ensembl ncRNAs	0.1	ext	2	advanced	False	Plus	5	94	0	False	False	none	90	filter for highest bit score	sort hits on sequence+target accession
Hsa Refseq mRNA rRNA	0.1	ext	2	advanced	False	Plus	5	94	0	False	False	none	90	filter for highest bit score	sort hits on sequence+target accession
Hsa ncRNA NCBI Nucleotide	0.1	ext	2	advanced	False	Plus	5	94	0	False	False	none	90	filter for highest bit score	sort hits on sequence+target accession
