# Supplementary material for: Small RNA-seq analysis of single porcine blastocysts revealed that maternal estradiol-17beta exposure does not affect miRNA isoform (isomiR) expression
Source: BMC Genomics. 2018 Aug 6;19:590. doi: 10.1186/s12864-018-4954-9 (PMC6090871; doi:10.1186/s12864-018-4954-9)
Supplement: Supplementary file 14 — Table S8. IsomiR analysis. (XLSX 202 kb) [file 12864_2018_4954_MOESM14_ESM.xlsx]

## Sheet: Sheet1
seq	type	miRNA	miRNA.type	miRNA_status	templated	species	length	count_sum	five_prime	middle	three_prime	mature	group	modification	rank	top_rank	top_5_rank	top_non-temp
AAAGTGCTTATAGTGCAGGTAGA	miRNA	bta-miR-20a	mature	novel	non-templated	cattle	23	1699	-1	22	1	0	both_non-temp	both	1	1	1	1
AAATGGATTTTTGGAGCT	miRNA	bta-miR-1246	mature	novel	non-templated	cattle	18	6912	1	16	3	0	both_non-temp	both	1	1	1	1
ACTCAAACTGTGGGGGCACCTT	miRNA	hsa-miR-371a-5p	mature	novel	non-templated	human	22	5615	0	19	3	0	three_non-temp	three_prime	1	1	1	1
ACTGGACTAGGAGTCAGAAGGC	miRNA	hsa-miR-378i	mature	novel	non-templated	human	22	622	0	21	1	0	three_non-temp	three_prime	1	1	1	1
ACTGGACTTGGAGCCAGAAGGC	miRNA	hsa-miR-378f	mature	novel	non-templated	human	22	3451	0	20	2	0	three_non-temp	three_prime	1	1	1	1
ACTGGACTTGGAGTCAGAAAGC	miRNA	hsa-miR-378d	mature	novel	non-templated	human	22	687	0	20	2	0	three_non-temp	three_prime	1	1	1	1
ACTGGACTTGGAGTCAGGAGGC	miRNA	hsa-miR-378e	mature	novel	non-templated	human	22	3842	0	19	3	0	three_non-temp	three_prime	1	1	1	1
ACTGGGCTTGGAGTCAGAAGGC	miRNA	hsa-miR-378g	mature	novel	non-templated	human	22	3847	0	20	2	0	three_non-temp	three_prime	1	1	1	1
AGCTTATCAGACTGATGTTGACA	miRNA	bta-miR-21-5p	mature	novel	non-templated	cattle	23	52101	-1	22	1	0	both_non-temp	both	1	1	1	1
AGGCAGTGTATTGTTAGCTGGT	miRNA	bta-miR-449b	mature	novel	non-templated	cattle	22	596	0	21	1	0	three_non-temp	three_prime	1	1	1	1
ATCACATTGCCAGGGATTACCACT	miRNA	ssc-miR-23b	mature	known	non-templated	pig	24	2234	0	22	2	0	three_non-temp	three_prime	1	1	1	1
CCTGAACTAGGGGTCTGGAGT	miRNA	ssc-miR-345-3p	mature	known	non-templated	pig	21	650	-1	20	1	0	both_non-temp	both	1	1	1	1
CCTGGACTTGGAGTCAGAAGG	miRNA	bta-miR-378d	mature	novel	non-templated	cattle	21	13630	1	19	3	0	both_non-temp	both	1	1	1	1
CTATACAACCTACTGCCTTCCT	miRNA	hsa-let-7b-3p	mature	novel	non-templated	human	22	433	0	21	1	0	three_non-temp	three_prime	1	1	1	1
CTATACAATCTACTGTCTTTCT	miRNA	bta-let-7a-3p	mature	novel	non-templated	cattle	22	544	0	21	1	0	three_non-temp	three_prime	1	1	1	1
CTGTGCGTGTGACAGCGGCTGAAA	miRNA	ssc-miR-210	mature	known	non-templated	pig	24	5676	0	22	2	0	three_non-temp	three_prime	1	1	1	1
GCAGTCCATGGGCATATACACC	miRNA	ssc-miR-455-3p	mature	known	non-templated	pig	22	716	0	21	1	0	three_non-temp	three_prime	1	1	1	1
TAACACTGTCTGGTAACGATGTC	miRNA	hsa-miR-200a-3p	mature	novel	non-templated	cattle	23	61675	0	22	1	0	three_non-temp	three_prime	1	1	1	1
TAAGTGCTTCCATGCTTTAGTAG	miRNA	hsa-miR-302e	mature	novel	non-templated	human	23	5068	0	17	6	0	three_non-temp	three_prime	1	1	1	1
TAGCAGCGGGAACAGTACTGAAA	miRNA	bta-miR-503-5p	mature	novel	non-templated	cattle	23	446	0	20	3	0	three_non-temp	three_prime	1	1	1	1
TCACATTGCCAGGGATTACCACT	miRNA	bta-miR-23b-3p	mature	novel	non-templated	cattle	23	584	-1	22	1	0	both_non-temp	both	1	1	1	1
TCAGTGCATGACAGAACTTGGT	miRNA	ssc-miR-152	mature	known	non-templated	pig	22	4144	0	21	1	0	three_non-temp	three_prime	1	1	1	1
TCCCAGCGGTGCCTCCA	miRNA	hsa-miR-5100	mature	novel	non-templated	human	17	1831	-6	15	2	0	both_non-temp	both	1	1	1	1
TCCCTGTCCTCCAGGAGCTCT	miRNA	ssc-miR-4334-3p	mature	known	non-templated	pig	21	639	0	20	1	0	three_non-temp	three_prime	1	1	1	1
TCCTTCATTCCACCGGAGTCTGA	miRNA	ssc-miR-205	mature	known	non-templated	pig	23	2102	0	22	1	0	three_non-temp	three_prime	1	1	1	1
TGGAAGACTAGTGATTTTGTTGCT	miRNA	hsa-miR-7-5p	mature	novel	non-templated	human	24	2260	0	22	2	0	three_non-temp	three_prime	1	1	1	1
TGTAAACATCCCCGACTGGAAGTT	miRNA	hsa-miR-30d-5p	mature	novel	non-templated	human	24	738	0	22	2	0	three_non-temp	three_prime	1	1	1	1
TGTGCAAATCTATGCAAAACTGT	miRNA	ssc-miR-19a	mature	known	non-templated	pig	23	942	0	22	1	0	three_non-temp	three_prime	1	1	1	1
AAAACGTGAGGCGCTGCTAT	miRNA	ssc-miR-424-3p	mature	known	templated	pig	20	1403	1	20	0	0	five_temp	five_prime	3	0	1	0
AAAACGTGAGGCGCTGCTATA	miRNA	ssc-miR-424-3p	mature	known	templated	pig	21	1249	-1	20	1	0	both_temp	both	5	0	1	0
AAAAGCTGGGTTGAGAGGGC	miRNA	ssc-miR-320	mature	known	templated	pig	20	2889	0	20	3	0	three_temp	three_prime	8	0	0	0
AAAAGCTGGGTTGAGAGGGCA	miRNA	ssc-miR-320	mature	known	templated	pig	21	488	0	20	3	0	three_temp	three_prime	23	0	0	0
AAAAGCTGGGTTGAGAGGGCG	miRNA	ssc-miR-320	mature	known	templated	pig	21	4940	0	21	2	0	three_temp	three_prime	4	0	1	0
AAAAGCTGGGTTGAGAGGGCGA	miRNA	ssc-miR-320	mature	known	templated	pig	22	14989	0	22	1	0	three_temp	three_prime	1	1	1	0
AAAAGCTGGGTTGAGAGGGCGAA	miRNA	ssc-miR-320	mature	known	templated	pig	23	14057	0	23	0	1	mature	mature	2	0	1	0
AAAAGCTGGGTTGAGAGGGCGAAA	miRNA	ssc-miR-320	mature	known	templated	pig	24	6053	0	23	1	0	three_temp	three_prime	3	0	1	0
AAAAGCTGGGTTGAGAGGGCGAAAA	miRNA	ssc-miR-320	mature	known	templated	pig	25	673	0	23	2	0	three_temp	three_prime	20	0	0	0
AAAAGCTGGGTTGAGAGGGCGAAAT	miRNA	ssc-miR-320	mature	known	non-templated	pig	25	450	0	23	2	0	three_non-temp	three_prime	27	0	0	0
AAAAGCTGGGTTGAGAGGGCGAAC	miRNA	ssc-miR-320	mature	known	non-templated	pig	24	855	0	23	1	0	three_non-temp	three_prime	14	0	0	0
AAAAGCTGGGTTGAGAGGGCGAAG	miRNA	ssc-miR-320	mature	known	non-templated	pig	24	1417	0	23	1	0	three_non-temp	three_prime	12	0	0	0
AAAAGCTGGGTTGAGAGGGCGAAT	miRNA	ssc-miR-320	mature	known	non-templated	pig	24	2941	0	23	1	0	three_non-temp	three_prime	7	0	0	0
AAAAGCTGGGTTGAGAGGGCGAC	miRNA	ssc-miR-320	mature	known	non-templated	pig	23	488	0	22	1	0	three_non-temp	three_prime	24	0	0	0
AAAAGCTGGGTTGAGAGGGCGAG	miRNA	ssc-miR-320	mature	known	non-templated	pig	23	831	0	22	1	0	three_non-temp	three_prime	16	0	0	0
AAAAGCTGGGTTGAGAGGGCGAT	miRNA	ssc-miR-320	mature	known	non-templated	pig	23	1948	0	22	1	0	three_non-temp	three_prime	10	0	0	0
AAAAGCTGGGTTGAGAGGGCGATT	miRNA	ssc-miR-320	mature	known	non-templated	pig	24	451	0	22	2	0	three_non-temp	three_prime	26	0	0	0
AAAAGCTGGGTTGAGAGGGCGC	miRNA	ssc-miR-320	mature	known	non-templated	pig	22	703	0	21	2	0	three_non-temp	three_prime	18	0	0	0
AAAAGCTGGGTTGAGAGGGCGG	miRNA	ssc-miR-320	mature	known	non-templated	pig	22	365	0	21	2	0	three_non-temp	three_prime	29	0	0	0
AAAAGCTGGGTTGAGAGGGCGT	miRNA	ssc-miR-320	mature	known	non-templated	pig	22	1885	0	21	2	0	three_non-temp	three_prime	11	0	0	0
AAAAGCTGGGTTGAGAGGGT	miRNA	ssc-miR-320	mature	known	templated	pig	20	695	0	19	4	0	three_temp	three_prime	19	0	0	0
AAAAGTGCTTACAGTGCAGGTAG	miRNA	ssc-miR-106a	mature	known	templated	pig	23	4134	0	23	1	0	three_temp	three_prime	2	0	1	0
AAAAGTGCTTACAGTGCAGGTAGA	miRNA	ssc-miR-106a	mature	known	non-templated	pig	24	1840	0	23	1	0	three_non-temp	three_prime	4	0	1	0
AAACCCGTAGATCCGATCTTGC	miRNA	ssc-miR-99a	mature	known	non-templated	pig	22	700	1	20	2	0	both_non-temp	both	20	0	0	0
AAACCCGTAGATCCGATCTTGT	miRNA	ssc-miR-99a	mature	known	templated	pig	22	3282	1	21	1	0	both_temp	both	9	0	0	0
AAACCGTTACCATTACTGAGT	miRNA	ssc-miR-451	mature	known	templated	pig	21	1923	0	21	1	0	three_temp	three_prime	1	1	1	0
AAACGTGGATGTACTTGCT	miRNA	hsa-miR-302a-5p	mature	novel	templated	human	19	1458	4	19	0	0	five_temp	five_prime	26	0	0	0
AAACGTGGATGTACTTGCTC	miRNA	hsa-miR-302a-5p	mature	novel	non-templated	human	20	1835	-4	19	1	0	both_non-temp	both	21	0	0	0
AAACGTGGATGTACTTGCTT	miRNA	hsa-miR-302a-5p	mature	novel	templated	human	20	10609	-4	19	1	0	both_temp	both	10	0	0	0
AAACTGTGGGGGCACTT	miRNA	ssc-miR-371-5p	mature	known	templated	pig	17	453	-4	17	-1	0	both_temp	both	127	0	0	0
AAACTGTGGGGGCACTTT	miRNA	ssc-miR-371-5p	mature	known	templated	pig	18	1771	4	18	0	0	five_temp	five_prime	74	0	0	0
AAACTGTGGGGGCACTTTC	miRNA	ssc-miR-371-5p	mature	known	templated	pig	19	564	-4	18	1	0	both_temp	both	114	0	0	0
AAAGAATTCTCCTTTTGGGC	miRNA	ssc-miR-186	mature	known	templated	pig	20	570	-1	20	-2	0	both_temp	both	11	0	0	0
AAAGAATTCTCCTTTTGGGCT	miRNA	ssc-miR-186	mature	known	templated	pig	21	1722	-1	21	-1	0	both_temp	both	5	0	1	0
AAAGAATTCTCCTTTTGGGCTT	miRNA	ssc-miR-186	mature	known	templated	pig	22	1102	1	22	0	0	five_temp	five_prime	7	0	0	0
AAAGCTGGGTTGAGAGGGC	miRNA	ssc-miR-320	mature	known	templated	pig	19	800	-1	19	-3	0	both_temp	both	17	0	0	0
AAAGCTGGGTTGAGAGGGCG	miRNA	ssc-miR-320	mature	known	templated	pig	20	1227	-1	20	-2	0	both_temp	both	13	0	0	0
AAAGCTGGGTTGAGAGGGCGA	miRNA	ssc-miR-320	mature	known	templated	pig	21	3554	-1	21	-1	0	both_temp	both	6	0	0	0
AAAGCTGGGTTGAGAGGGCGAA	miRNA	ssc-miR-320	mature	known	templated	pig	22	3835	1	22	0	0	five_temp	five_prime	5	0	1	0
AAAGCTGGGTTGAGAGGGCGAAA	miRNA	ssc-miR-320	mature	known	templated	pig	23	2136	-1	22	1	0	both_temp	both	9	0	0	0
AAAGCTGGGTTGAGAGGGCGAAAA	miRNA	hsa-miR-320c	mature	novel	templated	human	24	376	-1	18	6	0	both_temp	both	1	1	1	0
AAAGCTGGGTTGAGAGGGCGAAG	miRNA	ssc-miR-320	mature	known	non-templated	pig	23	494	-1	22	1	0	both_non-temp	both	22	0	0	0
AAAGCTGGGTTGAGAGGGCGAAT	miRNA	ssc-miR-320	mature	known	non-templated	pig	23	850	-1	22	1	0	both_non-temp	both	15	0	0	0
AAAGCTGGGTTGAGAGGGCGAT	miRNA	ssc-miR-320	mature	known	non-templated	pig	22	505	-1	21	1	0	both_non-temp	both	21	0	0	0
AAAGCTGGGTTGAGAGGGCGT	miRNA	ssc-miR-320	mature	known	non-templated	pig	21	404	-1	20	-2	0	both_non-temp	both	28	0	0	0
AAAGTGCTGACAGTGCAGATA	miRNA	bta-miR-106b	mature	novel	templated	cattle	21	412	-1	20	1	0	both_temp	both	3	0	1	0
AAAGTGCTGTTCGTGCAGGTAG	miRNA	hsa-miR-93-5p	mature	novel	templated	human	22	5008	1	22	0	0	five_temp	five_prime	1	1	1	0
AAAGTGCTGTTCGTGCAGGTAGA	miRNA	hsa-miR-93-5p	mature	novel	non-templated	human	23	613	-1	22	1	0	both_non-temp	both	2	0	1	0
AAAGTGCTTACAGTGCAGGT	miRNA	ssc-miR-106a	mature	known	templated	pig	20	280	-1	20	-3	0	both_temp	both	6	0	0	0
AAAGTGCTTACAGTGCAGGTAA	miRNA	ssc-miR-106a	mature	known	non-templated	pig	22	407	-1	21	-2	0	both_non-temp	both	5	0	1	0
AAAGTGCTTACAGTGCAGGTAG	miRNA	ssc-miR-106a	mature	known	templated	pig	22	7882	-1	22	-1	0	both_temp	both	1	1	1	0
AAAGTGCTTACAGTGCAGGTAGA	miRNA	ssc-miR-106a	mature	known	non-templated	pig	23	3771	-1	22	1	0	both_non-temp	both	3	0	1	0
AAAGTGCTTATAGTGCAGGT	miRNA	ssc-miR-20a	mature	known	templated	pig	20	384	-1	20	-1	0	both_temp	both	13	0	0	0
AAAGTGCTTATAGTGCAGGTAA	miRNA	ssc-miR-20a	mature	known	non-templated	pig	22	887	-1	21	1	0	both_non-temp	both	6	0	0	0
AAAGTGCTTATAGTGCAGGTAG	miRNA	ssc-miR-20a	mature	known	templated	pig	22	19247	-1	21	1	0	both_temp	both	2	0	1	0
AAAGTGCTTCCATGTTTTAGA	miRNA	bta-miR-302a	mature	novel	non-templated	cattle	21	458	1	19	3	0	both_non-temp	both	40	0	0	0
AAAGTGCTTCCATGTTTTAGC	miRNA	bta-miR-302a	mature	novel	non-templated	cattle	21	7681	1	19	3	0	both_non-temp	both	9	0	0	0
AAAGTGCTTCCATGTTTTAGG	miRNA	bta-miR-302a	mature	novel	non-templated	cattle	21	706	1	19	3	0	both_non-temp	both	34	0	0	0
AAAGTGCTTCCATGTTTTAGTA	miRNA	bta-miR-302a	mature	novel	non-templated	cattle	22	2759	1	20	2	0	both_non-temp	both	20	0	0	0
AAAGTGCTTCCATGTTTTAGTG	miRNA	bta-miR-302a	mature	novel	non-templated	cattle	22	4007	1	21	1	0	both_non-temp	both	15	0	0	0
AAAGTGCTTCCATGTTTTAGTGA	miRNA	bta-miR-302a	mature	novel	non-templated	cattle	23	17234	1	22	0	0	five_non-temp	five_prime	4	0	1	0
AAAGTGCTTCCATGTTTTAGTGAA	miRNA	bta-miR-302a	mature	novel	non-templated	cattle	24	481	1	22	1	0	both_non-temp	both	38	0	0	0
AAAGTGCTTCCATGTTTTAGTGC	miRNA	bta-miR-302a	mature	novel	non-templated	cattle	23	1678	1	21	1	0	both_non-temp	both	25	0	0	0
AAAGTGCTTCCATGTTTTAGTGG	miRNA	bta-miR-302a	mature	novel	non-templated	cattle	23	945	1	21	1	0	both_non-temp	both	30	0	0	0
AAAGTGCTTCCATGTTTTAGTGT	miRNA	bta-miR-302a	mature	novel	non-templated	cattle	23	6065	1	21	1	0	both_non-temp	both	11	0	0	0
AAAGTTCTGAGACACTCCGACC	miRNA	ssc-miR-148a-5p	mature	known	non-templated	pig	22	575	0	21	1	0	three_non-temp	three_prime	2	0	1	0
AAAGTTCTGAGACACTCCGACT	miRNA	ssc-miR-148a-5p	mature	known	templated	pig	22	2910	0	22	0	1	mature	mature	1	1	1	0
AAATGGATTTTTGGAGCC	miRNA	bta-miR-1246	mature	novel	non-templated	cattle	18	1692	1	16	3	0	both_non-temp	both	3	0	1	0
AAATGGATTTTTGGAGT	miRNA	bta-miR-1246	mature	novel	non-templated	cattle	17	1280	1	15	4	0	both_non-temp	both	5	0	1	0
AAATTCGTATCTAGGGGAAT	miRNA	ssc-miR-10a-3p	mature	known	templated	pig	20	432	1	20	0	0	five_temp	five_prime	2	0	1	0
AACACTGTCTGGTAACG	miRNA	bta-miR-200a	mature	novel	templated	cattle	17	805	-1	17	-5	0	both_temp	both	27	0	0	0
AACACTGTCTGGTAACGAT	miRNA	bta-miR-200a	mature	novel	templated	cattle	19	934	-1	19	-3	0	both_temp	both	24	0	0	0
AACACTGTCTGGTAACGATG	miRNA	bta-miR-200a	mature	novel	templated	cattle	20	4582	-1	20	-2	0	both_temp	both	10	0	0	0
AACACTGTCTGGTAACGATGA	miRNA	bta-miR-200a	mature	novel	non-templated	cattle	21	392	-1	20	-2	0	both_non-temp	both	32	0	0	0
AACACTGTCTGGTAACGATGAT	miRNA	hsa-miR-200a-3p	mature	novel	non-templated	human	22	625	-1	20	2	0	both_non-temp	both	6	0	0	0
AACACTGTCTGGTAACGATGC	miRNA	bta-miR-200a	mature	novel	non-templated	cattle	21	3083	-1	20	-2	0	both_non-temp	both	14	0	0	0
AACACTGTCTGGTAACGATGCT	miRNA	hsa-miR-200a-3p	mature	novel	non-templated	human	22	585	-1	20	2	0	both_non-temp	both	7	0	0	0
AACACTGTCTGGTAACGATGT	miRNA	bta-miR-200a	mature	novel	templated	cattle	21	12750	-1	21	-1	0	both_temp	both	7	0	0	0
AACACTGTCTGGTAACGATGTA	miRNA	bta-miR-200a	mature	novel	non-templated	cattle	22	1226	-1	21	1	0	both_non-temp	both	21	0	0	0
AACACTGTCTGGTAACGATGTC	miRNA	bta-miR-200a	mature	novel	non-templated	cattle	22	11734	-1	21	1	0	both_non-temp	both	8	0	0	0
AACACTGTCTGGTAACGATGTG	miRNA	bta-miR-200a	mature	novel	non-templated	cattle	22	855	-1	21	1	0	both_non-temp	both	26	0	0	0
AACACTGTCTGGTAACGATGTT	miRNA	bta-miR-200a	mature	novel	templated	cattle	22	59617	1	22	0	0	five_temp	five_prime	3	0	1	0
AACACTGTCTGGTAACGATGTTA	miRNA	bta-miR-200a	mature	novel	non-templated	cattle	23	634	-1	22	1	0	both_non-temp	both	30	0	0	0
AACACTGTCTGGTAACGATGTTT	miRNA	bta-miR-200a	mature	novel	non-templated	cattle	23	795	-1	22	1	0	both_non-temp	both	28	0	0	0
AACATTCAACGCTGTCGGT	miRNA	ssc-miR-181a	mature	known	templated	pig	19	356	0	19	5	0	three_temp	three_prime	8	0	0	0
AACATTCAACGCTGTCGGTG	miRNA	ssc-miR-181a	mature	known	templated	pig	20	460	0	20	4	0	three_temp	three_prime	7	0	0	0
AACATTCAACGCTGTCGGTGA	miRNA	ssc-miR-181a	mature	known	templated	pig	21	867	0	21	3	0	three_temp	three_prime	2	0	1	0
AACATTCAACGCTGTCGGTGAG	miRNA	ssc-miR-181a	mature	known	templated	pig	22	602	0	22	2	0	three_temp	three_prime	5	0	1	0
AACATTCAACGCTGTCGGTGAGA	miRNA	ssc-miR-181a	mature	known	non-templated	pig	23	514	0	22	2	0	three_non-temp	three_prime	6	0	0	0
AACATTCAACGCTGTCGGTGAGC	miRNA	ssc-miR-181a	mature	known	non-templated	pig	23	769	0	22	2	0	three_non-temp	three_prime	3	0	1	0
AACATTCAACGCTGTCGGTGAGT	miRNA	ssc-miR-181a	mature	known	templated	pig	23	3908	0	23	1	0	three_temp	three_prime	1	1	1	0
AACATTCATTGCTGTCGGTGGGT	miRNA	ssc-miR-181b	mature	known	templated	pig	23	461	0	23	1	0	three_temp	three_prime	1	1	1	0
AACATTCATTGTTGTCGGTGGGT	miRNA	ssc-miR-181d-5p	mature	known	templated	pig	23	384	0	23	1	0	three_temp	three_prime	1	1	1	0
AACATTCATTGTTGTCGGTGGGTT	miRNA	ssc-miR-181d-5p	mature	known	templated	pig	24	344	0	24	0	1	mature	mature	2	0	1	0
AACCCGTAGATCCGAACTTG	miRNA	ssc-miR-100	mature	known	templated	pig	20	472	0	20	2	0	three_temp	three_prime	3	0	1	0
AACCCGTAGATCCGAACTTGT	miRNA	ssc-miR-100	mature	known	templated	pig	21	738	0	21	1	0	three_temp	three_prime	2	0	1	0
AACCCGTAGATCCGAACTTGTG	miRNA	ssc-miR-100	mature	known	templated	pig	22	1957	0	22	0	1	mature	mature	1	1	1	0
AACCCGTAGATCCGATCT	miRNA	ssc-miR-99a	mature	known	templated	pig	18	628	0	18	4	0	three_temp	three_prime	22	0	0	0
AACCCGTAGATCCGATCTT	miRNA	ssc-miR-99a	mature	known	templated	pig	19	761	0	19	3	0	three_temp	three_prime	19	0	0	0
AACCCGTAGATCCGATCTTG	miRNA	ssc-miR-99a	mature	known	templated	pig	20	5291	0	20	2	0	three_temp	three_prime	7	0	0	0
AACCCGTAGATCCGATCTTGA	miRNA	ssc-miR-99a	mature	known	non-templated	pig	21	1608	0	20	2	0	three_non-temp	three_prime	12	0	0	0
AACCCGTAGATCCGATCTTGC	miRNA	ssc-miR-99a	mature	known	non-templated	pig	21	15415	0	20	2	0	three_non-temp	three_prime	4	0	1	0
AACCCGTAGATCCGATCTTGG	miRNA	ssc-miR-99a	mature	known	non-templated	pig	21	1496	0	20	2	0	three_non-temp	three_prime	14	0	0	0
AACCCGTAGATCCGATCTTGT	miRNA	ssc-miR-99a	mature	known	templated	pig	21	66269	0	21	1	0	three_temp	three_prime	1	1	1	0
AACCCGTAGATCCGATCTTGTA	miRNA	ssc-miR-99a	mature	known	non-templated	pig	22	1573	0	21	1	0	three_non-temp	three_prime	13	0	0	0
AACCCGTAGATCCGATCTTGTAA	miRNA	ssc-miR-99a	mature	known	non-templated	pig	23	526	0	21	2	0	three_non-temp	three_prime	23	0	0	0
AACCCGTAGATCCGATCTTGTG	miRNA	ssc-miR-99a	mature	known	templated	pig	22	16145	0	22	0	1	mature	mature	3	0	1	0
AACCCGTAGATCCGATCTTGTGA	miRNA	ssc-miR-99a	mature	known	non-templated	pig	23	29162	0	22	1	0	three_non-temp	three_prime	2	0	1	0
AACCCGTAGATCCGATCTTGTGAA	miRNA	ssc-miR-99a	mature	known	non-templated	pig	24	969	0	22	2	0	three_non-temp	three_prime	16	0	0	0
AACCCGTAGATCCGATCTTGTGC	miRNA	ssc-miR-99a	mature	known	non-templated	pig	23	839	0	22	1	0	three_non-temp	three_prime	17	0	0	0
AACCCGTAGATCCGATCTTGTGG	miRNA	ssc-miR-99a	mature	known	templated	pig	23	826	0	22	1	0	three_temp	three_prime	18	0	0	0
AACCCGTAGATCCGATCTTGTGT	miRNA	ssc-miR-99a	mature	known	non-templated	pig	23	3457	0	22	1	0	three_non-temp	three_prime	8	0	0	0
AACGGAATCCCAAAAGC	miRNA	ssc-miR-191	mature	known	templated	pig	17	426	-1	17	-5	0	both_temp	both	26	0	0	0
AACGGAATCCCAAAAGCAGC	miRNA	ssc-miR-191	mature	known	templated	pig	20	815	-1	20	-2	0	both_temp	both	19	0	0	0
AACGGAATCCCAAAAGCAGCA	miRNA	ssc-miR-191	mature	known	non-templated	pig	21	376	-1	20	-2	0	both_non-temp	both	27	0	0	0
AACGGAATCCCAAAAGCAGCC	miRNA	ssc-miR-191	mature	known	non-templated	pig	21	1807	-1	20	-2	0	both_non-temp	both	14	0	0	0
AACGGAATCCCAAAAGCAGCT	miRNA	ssc-miR-191	mature	known	templated	pig	21	7047	-1	21	-1	0	both_temp	both	6	0	0	0
AACGGAATCCCAAAAGCAGCTA	miRNA	ssc-miR-191	mature	known	non-templated	pig	22	2382	-1	21	1	0	both_non-temp	both	11	0	0	0
AACGGAATCCCAAAAGCAGCTG	miRNA	ssc-miR-191	mature	known	templated	pig	22	42713	1	22	0	0	five_temp	five_prime	2	0	1	0
AACGGAATCCCAAAAGCAGCTGA	miRNA	ssc-miR-191	mature	known	non-templated	pig	23	666	-1	22	1	0	both_non-temp	both	22	0	0	0
AACGGAATCCCAAAAGCAGCTGT	miRNA	ssc-miR-191	mature	known	templated	pig	23	1015	-1	22	1	0	both_temp	both	18	0	0	0
AACGGAATCCCAAAAGCAGCTT	miRNA	ssc-miR-191	mature	known	non-templated	pig	22	640	-1	21	1	0	both_non-temp	both	23	0	0	0
AACTGTGGGGGCACTTT	miRNA	ssc-miR-371-5p	mature	known	templated	pig	17	1043	5	17	0	0	five_temp	five_prime	89	0	0	0
AAGCTCGGTCTGAGGCCCCTC	miRNA	bta-miR-423-3p	mature	novel	templated	cattle	21	4148	0	21	3	0	three_temp	three_prime	1	1	1	0
AAGCTCGGTCTGAGGCCCCTCA	miRNA	bta-miR-423-3p	mature	novel	templated	cattle	22	1356	0	22	2	0	three_temp	three_prime	2	0	1	0
AAGCTCGGTCTGAGGCCCCTCAG	miRNA	ssc-miR-423-3p	mature	known	templated	pig	23	3769	1	22	1	0	both_temp	both	12	0	0	0
AAGCTCGGTCTGAGGCCCCTCAGA	miRNA	ssc-miR-423-3p	mature	known	non-templated	pig	24	1789	1	22	1	0	both_non-temp	both	19	0	0	0
AAGCTCGGTCTGAGGCCCCTCAGC	miRNA	ssc-miR-423-3p	mature	known	non-templated	pig	24	4542	1	22	1	0	both_non-temp	both	10	0	0	0
AAGCTCGGTCTGAGGCCCCTCAGG	miRNA	ssc-miR-423-3p	mature	known	non-templated	pig	24	543	1	22	1	0	both_non-temp	both	32	0	0	0
AAGCTCGGTCTGAGGCCCCTCAGT	miRNA	ssc-miR-423-3p	mature	known	templated	pig	24	21986	1	23	0	0	five_temp	five_prime	5	0	1	0
AAGCTCGGTCTGAGGCCCCTCAGTA	miRNA	ssc-miR-423-3p	mature	known	non-templated	pig	25	1615	1	23	1	0	both_non-temp	both	21	0	0	0
AAGCTCGGTCTGAGGCCCCTT	miRNA	ssc-miR-423-3p	mature	known	non-templated	pig	21	551	1	19	4	0	both_non-temp	both	31	0	0	0
AAGCTGCCAGTTGAAGAAC	miRNA	ssc-miR-22-3p	mature	known	templated	pig	19	1787	0	19	3	0	three_temp	three_prime	9	0	0	0
AAGCTGCCAGTTGAAGAACC	miRNA	ssc-miR-22-3p	mature	known	non-templated	pig	20	1309	0	19	3	0	three_non-temp	three_prime	10	0	0	0
AAGCTGCCAGTTGAAGAACT	miRNA	ssc-miR-22-3p	mature	known	templated	pig	20	5166	0	20	2	0	three_temp	three_prime	6	0	0	0
AAGCTGCCAGTTGAAGAACTG	miRNA	ssc-miR-22-3p	mature	known	templated	pig	21	954	0	21	1	0	three_temp	three_prime	13	0	0	0
AAGCTGCCAGTTGAAGAACTGA	miRNA	ssc-miR-22-3p	mature	known	non-templated	pig	22	5765	0	21	1	0	three_non-temp	three_prime	5	0	1	0
AAGCTGCCAGTTGAAGAACTGC	miRNA	ssc-miR-22-3p	mature	known	non-templated	pig	22	45722	0	21	1	0	three_non-temp	three_prime	2	0	1	0
AAGCTGCCAGTTGAAGAACTGG	miRNA	ssc-miR-22-3p	mature	known	non-templated	pig	22	4392	0	21	1	0	three_non-temp	three_prime	7	0	0	0
AAGCTGCCAGTTGAAGAACTGT	miRNA	ssc-miR-22-3p	mature	known	templated	pig	22	216346	0	22	0	1	mature	mature	1	1	1	0
AAGCTGCCAGTTGAAGAACTGTA	miRNA	ssc-miR-22-3p	mature	known	non-templated	pig	23	3656	0	22	1	0	three_non-temp	three_prime	8	0	0	0
AAGCTGCCAGTTGAAGAACTGTT	miRNA	ssc-miR-22-3p	mature	known	templated	pig	23	1133	0	22	1	0	three_temp	three_prime	12	0	0	0
AAGCTGGGTTGAGAGGGCGAA	miRNA	ssc-miR-320	mature	known	templated	pig	21	356	2	21	0	0	five_temp	five_prime	30	0	0	0
AAGCTGGGTTGAGAGGGCGAAA	miRNA	ssc-miR-320	mature	known	templated	pig	22	474	-2	21	1	0	both_temp	both	25	0	0	0
AAGGAGCTCACAGTCTATTG	miRNA	ssc-miR-28-5p	mature	known	templated	pig	20	3397	0	20	2	0	three_temp	three_prime	2	0	1	0
AAGGAGCTCACAGTCTATTGA	miRNA	ssc-miR-28-5p	mature	known	templated	pig	21	1264	0	21	1	0	three_temp	three_prime	5	0	1	0
AAGGAGCTCACAGTCTATTGAA	miRNA	ssc-miR-28-5p	mature	known	non-templated	pig	22	749	0	21	1	0	three_non-temp	three_prime	6	0	0	0
AAGGAGCTCACAGTCTATTGAG	miRNA	ssc-miR-28-5p	mature	known	templated	pig	22	9820	0	22	0	1	mature	mature	1	1	1	0
AAGGAGCTCACAGTCTATTGAGA	miRNA	ssc-miR-28-5p	mature	known	non-templated	pig	23	3025	0	22	1	0	three_non-temp	three_prime	3	0	1	0
AAGGTGCATCTAGTGCAGATAG	miRNA	ssc-miR-18a	mature	known	templated	pig	22	2030	-1	21	1	0	both_temp	both	2	0	1	0
AAGTGCTTCCATGTTTC	miRNA	bta-miR-302c	mature	novel	templated	cattle	17	727	-1	17	-5	0	both_temp	both	17	0	0	0
AAGTGCTTCCATGTTTCAGT	miRNA	bta-miR-302c	mature	novel	templated	cattle	20	893	-1	20	-2	0	both_temp	both	15	0	0	0
AAGTGCTTCCATGTTTCAGTG	miRNA	bta-miR-302c	mature	novel	templated	cattle	21	2606	-1	21	-1	0	both_temp	both	8	0	0	0
AAGTGCTTCCATGTTTCAGTGA	miRNA	bta-miR-302c	mature	novel	non-templated	cattle	22	873	-1	21	1	0	both_non-temp	both	16	0	0	0
AAGTGCTTCCATGTTTCAGTGG	miRNA	bta-miR-302c	mature	novel	templated	cattle	22	7467	1	22	0	0	five_temp	five_prime	3	0	1	0
AAGTGCTTCCATGTTTCAGTGGA	miRNA	bta-miR-302c	mature	novel	templated	cattle	23	1289	-1	22	1	0	both_temp	both	12	0	0	0
AAGTGCTTCCATGTTTCAGTGGC	miRNA	bta-miR-302c	mature	novel	non-templated	cattle	23	2094	-1	22	1	0	both_non-temp	both	9	0	0	0
AAGTGCTTCCATGTTTCAGTGGT	miRNA	bta-miR-302c	mature	novel	non-templated	cattle	23	9446	-1	22	1	0	both_non-temp	both	2	0	1	0
AAGTGCTTCCATGTTTCAGTGT	miRNA	bta-miR-302c	mature	novel	non-templated	cattle	22	609	-1	21	1	0	both_non-temp	both	19	0	0	0
AAGTGCTTCCATGTTTT	miRNA	bta-miR-302d	mature	novel	templated	cattle	17	3463	-1	17	-3	0	both_temp	both	15	0	0	0
AAGTGCTTCCATGTTTTAG	miRNA	bta-miR-302d	mature	novel	templated	cattle	19	543	-1	19	-1	0	both_temp	both	24	0	0	0
AAGTGCTTCCATGTTTTAGA	miRNA	bta-miR-302d	mature	novel	non-templated	cattle	20	1143	-1	19	1	0	both_non-temp	both	20	0	0	0
AAGTGCTTCCATGTTTTAGC	miRNA	bta-miR-302d	mature	novel	non-templated	cattle	20	17980	-1	19	1	0	both_non-temp	both	8	0	0	0
AAGTGCTTCCATGTTTTAGCAG	miRNA	bta-miR-302d	mature	novel	non-templated	cattle	22	497	-1	19	3	0	both_non-temp	both	25	0	0	0
AAGTGCTTCCATGTTTTAGG	miRNA	bta-miR-302d	mature	novel	non-templated	cattle	20	1542	-1	19	1	0	both_non-temp	both	18	0	0	0
AAGTGCTTCCATGTTTTAGT	miRNA	bta-miR-302d	mature	novel	templated	cattle	20	89016	1	20	0	0	five_temp	five_prime	3	0	1	0
AAGTGCTTCCATGTTTTAGTA	miRNA	bta-miR-302b	mature	novel	templated	cattle	21	6292	-1	21	-1	0	both_temp	both	8	0	0	0
AAGTGCTTCCATGTTTTAGTAA	miRNA	bta-miR-302b	mature	novel	non-templated	cattle	22	18750	-1	21	1	0	both_non-temp	both	6	0	0	0
AAGTGCTTCCATGTTTTAGTAC	miRNA	bta-miR-302b	mature	novel	non-templated	cattle	22	2714	-1	21	1	0	both_non-temp	both	14	0	0	0
AAGTGCTTCCATGTTTTAGTAG	miRNA	bta-miR-302b	mature	novel	templated	cattle	22	357756	1	22	0	0	five_temp	five_prime	2	0	1	0
AAGTGCTTCCATGTTTTAGTAGA	miRNA	bta-miR-302b	mature	novel	templated	cattle	23	60858	-1	22	1	0	both_temp	both	4	0	1	0
AAGTGCTTCCATGTTTTAGTAGC	miRNA	bta-miR-302b	mature	novel	non-templated	cattle	23	543	-1	22	1	0	both_non-temp	both	22	0	0	0
AAGTGCTTCCATGTTTTAGTAGG	miRNA	bta-miR-302b	mature	novel	templated	cattle	23	1188	-1	22	1	0	both_temp	both	20	0	0	0
AAGTGCTTCCATGTTTTAGTAGT	miRNA	bta-miR-302b	mature	novel	non-templated	cattle	23	2862	-1	22	1	0	both_non-temp	both	12	0	0	0
AAGTGCTTCCATGTTTTAGTAT	miRNA	bta-miR-302b	mature	novel	non-templated	cattle	22	1890	-1	21	1	0	both_non-temp	both	18	0	0	0
AAGTGCTTCCATGTTTTAGTG	miRNA	bta-miR-302a	mature	novel	templated	cattle	21	8851	0	21	1	0	three_temp	three_prime	7	0	0	0
AAGTGCTTCCATGTTTTAGTGA	miRNA	bta-miR-302a	mature	novel	templated	cattle	22	44655	0	22	0	1	mature	mature	2	0	1	0
AAGTGCTTCCATGTTTTAGTGAA	miRNA	bta-miR-302a	mature	novel	non-templated	cattle	23	1200	0	22	1	0	three_non-temp	three_prime	27	0	0	0
AAGTGCTTCCATGTTTTAGTGC	miRNA	bta-miR-302a	mature	novel	templated	cattle	22	3880	0	21	1	0	three_temp	three_prime	17	0	0	0
AAGTGCTTCCATGTTTTAGTGG	miRNA	bta-miR-302a	mature	novel	non-templated	cattle	22	2639	0	21	1	0	three_non-temp	three_prime	21	0	0	0
AAGTGCTTCCATGTTTTAGTGT	miRNA	bta-miR-302a	mature	novel	non-templated	cattle	22	13848	0	21	1	0	three_non-temp	three_prime	5	0	1	0
AAGTGGTTTTACCCTATGGTAG	miRNA	ssc-miR-140-5p	mature	known	non-templated	pig	22	571	1	21	0	0	five_non-temp	five_prime	3	0	1	0
AAGTTCTGAGACACTCCGACT	miRNA	ssc-miR-148a-5p	mature	known	templated	pig	21	526	1	21	0	0	five_temp	five_prime	3	0	1	0
AATACTGCCGGGTAATGAT	miRNA	bta-miR-200c	mature	novel	templated	cattle	19	303	-1	19	-3	0	both_temp	both	25	0	0	0
AATACTGCCGGGTAATGATG	miRNA	bta-miR-200c	mature	novel	templated	cattle	20	2503	-1	20	-2	0	both_temp	both	7	0	0	0
AATACTGCCGGGTAATGATGG	miRNA	bta-miR-200c	mature	novel	templated	cattle	21	1300	-1	21	-1	0	both_temp	both	11	0	0	0
AATACTGCCGGGTAATGATGGA	miRNA	bta-miR-200c	mature	novel	templated	cattle	22	15777	1	22	0	0	five_temp	five_prime	2	0	1	0
AATACTGCCGGGTAATGATGGAA	miRNA	bta-miR-200c	mature	novel	non-templated	cattle	23	1061	-1	22	1	0	both_non-temp	both	13	0	0	0
AATACTGCCGGGTAATGATGGAT	miRNA	bta-miR-200c	mature	novel	non-templated	cattle	23	896	-1	22	1	0	both_non-temp	both	16	0	0	0
AATACTGCCGGGTAATGATGGG	miRNA	bta-miR-200c	mature	novel	non-templated	cattle	22	423	-1	21	1	0	both_non-temp	both	22	0	0	0
AATACTGCCGGGTAATGATGGT	miRNA	bta-miR-200c	mature	novel	non-templated	cattle	22	379	-1	21	1	0	both_non-temp	both	23	0	0	0
AATACTGCCTGGTAATGATA	miRNA	bta-miR-200b	mature	novel	non-templated	cattle	20	526	-1	19	1	0	both_non-temp	both	22	0	0	0
AATACTGCCTGGTAATGATG	miRNA	bta-miR-200b	mature	novel	templated	cattle	20	9010	1	20	0	0	five_temp	five_prime	9	0	0	0
AATACTGCCTGGTAATGATGA	miRNA	bta-miR-200b	mature	novel	templated	cattle	21	7872	-1	20	1	0	both_temp	both	10	0	0	0
AATACTGCCTGGTAATGATGAA	miRNA	hsa-miR-200b-3p	mature	novel	non-templated	human	22	1106	-1	21	1	0	both_non-temp	both	6	0	0	0
AATACTGCCTGGTAATGATGAC	miRNA	hsa-miR-200b-3p	mature	novel	templated	human	22	116336	-1	21	1	0	both_temp	both	1	1	1	0
AATACTGCCTGGTAATGATGAT	miRNA	hsa-miR-200b-3p	mature	novel	non-templated	human	22	11986	-1	21	1	0	both_non-temp	both	2	0	1	0
AATACTGCCTGGTAATGATGCC	miRNA	hsa-miR-200b-3p	mature	novel	non-templated	human	22	390	-1	20	2	0	both_non-temp	both	9	0	0	0
AATACTGCCTGGTAATGATGGC	miRNA	hsa-miR-200b-3p	mature	novel	non-templated	human	22	631	-1	20	2	0	both_non-temp	both	7	0	0	0
AATACTGCCTGGTAATGATGT	miRNA	bta-miR-200b	mature	novel	non-templated	cattle	21	525	-1	20	1	0	both_non-temp	both	23	0	0	0
AATACTGCCTGGTAATGATGTC	miRNA	hsa-miR-200b-3p	mature	novel	non-templated	human	22	292	-1	20	2	0	both_non-temp	both	10	0	0	0
AATACTGTCTGGTAATGCCG	miRNA	ssc-miR-429	mature	known	templated	pig	20	1385	-1	20	-1	0	both_temp	both	6	0	0	0
AATACTGTCTGGTAATGCCGA	miRNA	ssc-miR-429	mature	known	non-templated	pig	21	252	-1	20	1	0	both_non-temp	both	16	0	0	0
AATACTGTCTGGTAATGCCGC	miRNA	ssc-miR-429	mature	known	non-templated	pig	21	2090	-1	20	1	0	both_non-temp	both	5	0	1	0
AATACTGTCTGGTAATGCCGT	miRNA	ssc-miR-429	mature	known	templated	pig	21	9502	1	21	0	0	five_temp	five_prime	3	0	1	0
AATCACTAACCACACGGCCAG	miRNA	hsa-miR-34c-3p	mature	novel	templated	human	21	305	0	21	1	0	three_temp	three_prime	7	0	0	0
AATCACTAACCACACGGCCAGA	miRNA	hsa-miR-34c-3p	mature	novel	non-templated	human	22	274	0	21	1	0	three_non-temp	three_prime	8	0	0	0
AATCACTAACCACACGGCCAGG	miRNA	hsa-miR-34c-3p	mature	novel	templated	human	22	2643	0	22	0	1	mature	mature	2	0	1	0
AATCCTTGGAACCTAGGTGTGAGT	miRNA	ssc-miR-362	mature	known	templated	pig	24	1192	0	24	1	0	three_temp	three_prime	1	1	1	0
AATCCTTGGAACCTAGGTGTGAGTG	miRNA	ssc-miR-362	mature	known	templated	pig	25	487	0	25	0	1	mature	mature	3	0	1	0
AATCCTTGGAACCTAGGTGTGAGTGC	miRNA	ssc-miR-362	mature	known	templated	pig	26	1112	0	25	1	0	three_temp	three_prime	2	0	1	0
AATGACACGATCACTCCCGTTG	miRNA	ssc-miR-425-5p	mature	known	templated	pig	22	841	0	22	1	0	three_temp	three_prime	5	0	1	0
AATGACACGATCACTCCCGTTGA	miRNA	ssc-miR-425-5p	mature	known	templated	pig	23	849	0	23	0	1	mature	mature	4	0	1	0
AATGACACGATCACTCCCGTTGAG	miRNA	ssc-miR-425-5p	mature	known	templated	pig	24	2537	0	23	1	0	three_temp	three_prime	2	0	1	0
AATGACACGATCACTCCCGTTGAGA	miRNA	ssc-miR-425-5p	mature	known	non-templated	pig	25	446	0	23	2	0	three_non-temp	three_prime	7	0	0	0
AATGACACGATCACTCCCGTTGAGC	miRNA	ssc-miR-425-5p	mature	known	non-templated	pig	25	1548	0	23	2	0	three_non-temp	three_prime	3	0	1	0
AATGACACGATCACTCCCGTTGAGT	miRNA	ssc-miR-425-5p	mature	known	templated	pig	25	7477	0	23	2	0	three_temp	three_prime	1	1	1	0
AATGCCCCTAAAAATCCTTAT	miRNA	ssc-miR-365-3p	mature	known	templated	pig	21	230	1	21	0	0	five_temp	five_prime	3	0	1	0
AATGGATTTTTGGAGCC	miRNA	bta-miR-1246	mature	novel	non-templated	cattle	17	449	0	16	3	0	three_non-temp	three_prime	9	0	0	0
AATGGATTTTTGGAGCT	miRNA	bta-miR-1246	mature	novel	non-templated	cattle	17	1737	0	16	3	0	three_non-temp	three_prime	2	0	1	0
AATGGCGCCACTAGGGTTGTG	miRNA	bta-miR-652	mature	novel	templated	cattle	21	1257	0	21	0	1	mature	mature	1	1	1	0
AATGGCGCCACTAGGGTTGTGT	miRNA	bta-miR-652	mature	novel	non-templated	cattle	22	548	0	21	1	0	three_non-temp	three_prime	2	0	1	0
AATTGCACGGTATCCATCTGTA	miRNA	ssc-miR-363	mature	known	templated	pig	22	1130	0	22	1	0	three_temp	three_prime	1	1	1	0
AATTGCACTTTAGCAATGGTG	miRNA	bta-miR-367	mature	novel	templated	cattle	21	1273	-1	21	-1	0	both_temp	both	1	1	1	0
ACACTGTCTGGTAACGATGTT	miRNA	bta-miR-200a	mature	novel	templated	cattle	21	323	2	21	0	0	five_temp	five_prime	33	0	0	0
ACAGATTCGATTCTAGGGGAAT	miRNA	hsa-miR-10b-3p	mature	novel	templated	human	22	603	0	22	0	1	mature	mature	1	1	1	0
ACAGTACTGTGATAACTGA	miRNA	ssc-miR-101	mature	known	templated	pig	19	597	-1	19	-1	0	both_temp	both	15	0	0	0
ACAGTACTGTGATAACTGAA	miRNA	ssc-miR-101	mature	known	templated	pig	20	862	1	20	0	0	five_temp	five_prime	14	0	0	0
ACAGTACTGTGATAACTGAAA	miRNA	ssc-miR-101	mature	known	non-templated	pig	21	531	-1	20	1	0	both_non-temp	both	17	0	0	0
ACAGTACTGTGATAACTGAAG	miRNA	ssc-miR-101	mature	known	templated	pig	21	2221	-1	20	1	0	both_temp	both	7	0	0	0
ACATGCCTTGAGTGTAGGACCGT	miRNA	ssc-miR-532-5p	mature	known	templated	pig	23	780	1	22	0	0	five_temp	five_prime	9	0	0	0
ACATTCAACGCTGTCGGTGAGT	miRNA	ssc-miR-181a	mature	known	templated	pig	22	692	-1	22	-1	0	both_temp	both	4	0	1	0
ACCACAGGGTAGAACCACGG	miRNA	ssc-miR-140-3p	mature	known	templated	pig	20	1800	-1	20	-2	0	both_temp	both	4	0	1	0
ACCACAGGGTAGAACCACGGA	miRNA	ssc-miR-140-3p	mature	known	templated	pig	21	2500	-1	21	-1	0	both_temp	both	2	0	1	0
ACCACAGGGTAGAACCACGGAC	miRNA	ssc-miR-140-3p	mature	known	templated	pig	22	5800	1	22	0	0	five_temp	five_prime	1	1	1	0
ACCACAGGGTAGAACCACGGACA	miRNA	ssc-miR-140-3p	mature	known	templated	pig	23	2198	-1	22	1	0	both_temp	both	3	0	1	0
ACCACAGGGTAGAACCACGGACG	miRNA	ssc-miR-140-3p	mature	known	non-templated	pig	23	707	-1	22	1	0	both_non-temp	both	11	0	0	0
ACCACAGGGTAGAACCACGGAT	miRNA	ssc-miR-140-3p	mature	known	non-templated	pig	22	713	-1	21	1	0	both_non-temp	both	10	0	0	0
ACCCGTAGAACCGACCTTGC	miRNA	ssc-miR-99b	mature	known	templated	pig	20	814	-1	20	-1	0	both_temp	both	7	0	0	0
ACCCGTAGAACCGACCTTGCA	miRNA	ssc-miR-99b	mature	known	non-templated	pig	21	544	-1	20	1	0	both_non-temp	both	11	0	0	0
ACCCGTAGAACCGACCTTGCG	miRNA	ssc-miR-99b	mature	known	templated	pig	21	5752	1	21	0	0	five_temp	five_prime	2	0	1	0
ACCCGTAGATCCGATCTTG	miRNA	ssc-miR-99a	mature	known	templated	pig	19	1023	-1	19	-2	0	both_temp	both	15	0	0	0
ACCCGTAGATCCGATCTTGC	miRNA	ssc-miR-99a	mature	known	non-templated	pig	20	2858	-1	19	-2	0	both_non-temp	both	11	0	0	0
ACCCGTAGATCCGATCTTGG	miRNA	ssc-miR-99a	mature	known	non-templated	pig	20	307	-1	19	-2	0	both_non-temp	both	25	0	0	0
ACCCGTAGATCCGATCTTGT	miRNA	ssc-miR-99a	mature	known	templated	pig	20	12270	-1	20	-1	0	both_temp	both	5	0	1	0
ACCCGTAGATCCGATCTTGTG	miRNA	ssc-miR-99a	mature	known	templated	pig	21	3013	1	21	0	0	five_temp	five_prime	10	0	0	0
ACCCGTAGATCCGATCTTGTGA	miRNA	ssc-miR-99a	mature	known	non-templated	pig	22	5487	-1	21	1	0	both_non-temp	both	6	0	0	0
ACCCGTAGATCCGATCTTGTGT	miRNA	ssc-miR-99a	mature	known	non-templated	pig	22	678	-1	21	1	0	both_non-temp	both	21	0	0	0
ACCCTGTAGAACCGAATT	miRNA	ssc-miR-10b	mature	known	templated	pig	18	637	-1	18	-3	0	both_temp	both	17	0	0	0
ACCCTGTAGAACCGAATTTG	miRNA	ssc-miR-10b	mature	known	templated	pig	20	4294	-1	20	-1	0	both_temp	both	8	0	0	0
ACCCTGTAGAACCGAATTTGA	miRNA	ssc-miR-10b	mature	known	non-templated	pig	21	365	-1	20	1	0	both_non-temp	both	24	0	0	0
ACCCTGTAGAACCGAATTTGC	miRNA	ssc-miR-10b	mature	known	non-templated	pig	21	3368	-1	20	1	0	both_non-temp	both	10	0	0	0
ACCCTGTAGAACCGAATTTGT	miRNA	ssc-miR-10b	mature	known	templated	pig	21	14678	1	21	0	0	five_temp	five_prime	5	0	1	0
ACCCTGTAGAACCGAATTTGTA	miRNA	ssc-miR-10b	mature	known	non-templated	pig	22	2913	-1	21	1	0	both_non-temp	both	11	0	0	0
ACCCTGTAGAACCGAATTTGTG	miRNA	ssc-miR-10b	mature	known	templated	pig	22	50927	-1	21	1	0	both_temp	both	3	0	1	0
ACCCTGTAGAACCGAATTTGTGA	miRNA	bta-miR-10b	mature	novel	non-templated	cattle	23	2374	-1	22	1	0	both_non-temp	both	2	0	1	0
ACCCTGTAGAACCGAATTTGTGC	miRNA	bta-miR-10b	mature	novel	non-templated	cattle	23	2241	-1	22	1	0	both_non-temp	both	3	0	1	0
ACCCTGTAGAACCGAATTTGTGT	miRNA	bta-miR-10b	mature	novel	templated	cattle	23	9616	-1	22	1	0	both_temp	both	1	1	1	0
ACCCTGTAGAACCGAATTTGTT	miRNA	ssc-miR-10b	mature	known	non-templated	pig	22	465	-1	21	1	0	both_non-temp	both	21	0	0	0
ACCCTGTAGATCCGAAT	miRNA	ssc-miR-10a-5p	mature	known	templated	pig	17	398	-1	17	-4	0	both_temp	both	32	0	0	0
ACCCTGTAGATCCGAATC	miRNA	ssc-miR-10a-5p	mature	known	non-templated	pig	18	291	-1	17	-4	0	both_non-temp	both	35	0	0	0
ACCCTGTAGATCCGAATT	miRNA	ssc-miR-10a-5p	mature	known	templated	pig	18	1686	-1	18	-3	0	both_temp	both	20	0	0	0
ACCCTGTAGATCCGAATTT	miRNA	ssc-miR-10a-5p	mature	known	templated	pig	19	1422	-1	19	-2	0	both_temp	both	21	0	0	0
ACCCTGTAGATCCGAATTTG	miRNA	ssc-miR-10a-5p	mature	known	templated	pig	20	5740	-1	20	-1	0	both_temp	both	9	0	0	0
ACCCTGTAGATCCGAATTTGA	miRNA	ssc-miR-10a-5p	mature	known	non-templated	pig	21	1003	-1	20	1	0	both_non-temp	both	24	0	0	0
ACCCTGTAGATCCGAATTTGC	miRNA	ssc-miR-10a-5p	mature	known	non-templated	pig	21	9857	-1	20	1	0	both_non-temp	both	7	0	0	0
ACCCTGTAGATCCGAATTTGG	miRNA	ssc-miR-10a-5p	mature	known	non-templated	pig	21	1029	-1	20	1	0	both_non-temp	both	23	0	0	0
ACCCTGTAGATCCGAATTTGT	miRNA	ssc-miR-10a-5p	mature	known	templated	pig	21	40846	1	21	0	0	five_temp	five_prime	2	0	1	0
ACCCTGTAGATCCGAATTTGTA	miRNA	ssc-miR-10a-5p	mature	known	non-templated	pig	22	2000	-1	21	1	0	both_non-temp	both	19	0	0	0
ACCCTGTAGATCCGAATTTGTG	miRNA	ssc-miR-10a-5p	mature	known	templated	pig	22	29739	-1	21	1	0	both_temp	both	4	0	1	0
ACCCTGTAGATCCGAATTTGTGA	miRNA	bta-miR-10a	mature	novel	non-templated	cattle	23	5399	-1	22	1	0	both_non-temp	both	2	0	1	0
ACCCTGTAGATCCGAATTTGTGC	miRNA	bta-miR-10a	mature	novel	non-templated	cattle	23	2133	-1	22	1	0	both_non-temp	both	3	0	1	0
ACCCTGTAGATCCGAATTTGTGG	miRNA	bta-miR-10a	mature	novel	non-templated	cattle	23	373	-1	22	1	0	both_non-temp	both	6	0	0	0
ACCCTGTAGATCCGAATTTGTGT	miRNA	bta-miR-10a	mature	novel	templated	cattle	23	9518	-1	22	1	0	both_temp	both	1	1	1	0
ACCCTGTAGATCCGAATTTGTT	miRNA	ssc-miR-10a-5p	mature	known	non-templated	pig	22	379	-1	21	1	0	both_non-temp	both	33	0	0	0
ACCTTCTTGTATAAGCACTGTGC	miRNA	bta-miR-1248	mature	novel	templated	cattle	23	639	0	23	4	0	three_temp	three_prime	2	0	1	0
ACCTTCTTGTATAAGCACTGTGCT	miRNA	bta-miR-1248	mature	novel	templated	cattle	24	1487	0	24	3	0	three_temp	three_prime	1	1	1	0
ACGCCCTTCCCCCCCTTCTTC	miRNA	ssc-miR-1249	mature	known	templated	pig	21	678	0	21	1	0	three_temp	three_prime	2	0	1	0
ACGCCCTTCCCCCCCTTCTTCA	miRNA	ssc-miR-1249	mature	known	templated	pig	22	1511	0	22	0	1	mature	mature	1	1	1	0
ACGGAATCCCAAAAGCAGCTG	miRNA	ssc-miR-191	mature	known	templated	pig	21	2116	2	21	0	0	five_temp	five_prime	13	0	0	0
ACGTTGGCTCTGGTGGTGATG	miRNA	ssc-miR-1306-3p	mature	known	templated	pig	21	455	0	21	0	1	mature	mature	4	0	1	0
ACGTTGGCTCTGGTGGTGATGT	miRNA	ssc-miR-1306-3p	mature	known	non-templated	pig	22	557	0	21	1	0	three_non-temp	three_prime	3	0	1	0
ACTAGACTGAAGCTCCTTGAG	miRNA	bta-miR-151-3p	mature	novel	templated	cattle	21	430	1	20	1	0	both_temp	both	1	1	1	0
ACTAGACTGAAGCTCCTTGAGG	miRNA	ssc-miR-151-3p	mature	known	templated	pig	22	2378	1	21	1	0	both_temp	both	9	0	0	0
ACTAGATTGTGAGCTCCTGG	miRNA	ssc-miR-28-3p	mature	known	templated	pig	20	797	-1	20	-1	0	both_temp	both	7	0	0	0
ACTAGATTGTGAGCTCCTGGA	miRNA	ssc-miR-28-3p	mature	known	templated	pig	21	2153	1	21	0	0	five_temp	five_prime	4	0	1	0
ACTAGATTGTGAGCTCCTGGAA	miRNA	ssc-miR-28-3p	mature	known	non-templated	pig	22	499	-1	21	1	0	both_non-temp	both	9	0	0	0
ACTAGATTGTGAGCTCCTGGAG	miRNA	ssc-miR-28-3p	mature	known	templated	pig	22	1558	-1	21	1	0	both_temp	both	5	0	1	0
ACTCAAACTGTGGGGGA	miRNA	ssc-miR-371-5p	mature	known	non-templated	pig	17	2344	0	16	6	0	three_non-temp	three_prime	64	0	0	0
ACTCAAACTGTGGGGGC	miRNA	ssc-miR-371-5p	mature	known	templated	pig	17	61787	0	17	5	0	three_temp	three_prime	14	0	0	0
ACTCAAACTGTGGGGGCA	miRNA	ssc-miR-371-5p	mature	known	templated	pig	18	24161	0	18	4	0	three_temp	three_prime	26	0	0	0
ACTCAAACTGTGGGGGCAA	miRNA	ssc-miR-371-5p	mature	known	non-templated	pig	19	989	0	18	4	0	three_non-temp	three_prime	91	0	0	0
ACTCAAACTGTGGGGGCAC	miRNA	ssc-miR-371-5p	mature	known	templated	pig	19	31729	0	19	3	0	three_temp	three_prime	20	0	0	0
ACTCAAACTGTGGGGGCACA	miRNA	ssc-miR-371-5p	mature	known	non-templated	pig	20	7255	0	19	3	0	three_non-temp	three_prime	43	0	0	0
ACTCAAACTGTGGGGGCACAAA	miRNA	hsa-miR-371a-5p	mature	novel	non-templated	human	22	382	0	19	3	0	three_non-temp	three_prime	28	0	0	0
ACTCAAACTGTGGGGGCACATT	miRNA	hsa-miR-371a-5p	mature	novel	non-templated	human	22	530	0	19	3	0	three_non-temp	three_prime	20	0	0	0
ACTCAAACTGTGGGGGCACC	miRNA	ssc-miR-371-5p	mature	known	non-templated	pig	20	26710	0	19	3	0	three_non-temp	three_prime	23	0	0	0
ACTCAAACTGTGGGGGCACCA	miRNA	hsa-miR-371a-5p	mature	novel	non-templated	human	21	319	0	19	2	0	three_non-temp	three_prime	30	0	0	0
ACTCAAACTGTGGGGGCACCC	miRNA	hsa-miR-371a-5p	mature	novel	non-templated	human	21	380	0	19	2	0	three_non-temp	three_prime	29	0	0	0
ACTCAAACTGTGGGGGCACCT	miRNA	hsa-miR-371a-5p	mature	novel	non-templated	human	21	1767	0	19	2	0	three_non-temp	three_prime	6	0	0	0
ACTCAAACTGTGGGGGCACCTC	miRNA	hsa-miR-371a-5p	mature	novel	non-templated	human	22	822	0	19	3	0	three_non-temp	three_prime	15	0	0	0
ACTCAAACTGTGGGGGCACCTTA	miRNA	hsa-miR-371a-5p	mature	novel	non-templated	human	23	581	0	19	4	0	three_non-temp	three_prime	19	0	0	0
ACTCAAACTGTGGGGGCACCTTC	miRNA	hsa-miR-371a-5p	mature	novel	non-templated	human	23	2726	0	19	4	0	three_non-temp	three_prime	4	0	1	0
ACTCAAACTGTGGGGGCACG	miRNA	ssc-miR-371-5p	mature	known	non-templated	pig	20	4152	0	19	3	0	three_non-temp	three_prime	52	0	0	0
ACTCAAACTGTGGGGGCACGT	miRNA	hsa-miR-371a-5p	mature	novel	non-templated	human	21	1463	0	19	2	0	three_non-temp	three_prime	9	0	0	0
ACTCAAACTGTGGGGGCACGTT	miRNA	hsa-miR-371a-5p	mature	novel	non-templated	human	22	489	0	19	3	0	three_non-temp	three_prime	22	0	0	0
ACTCAAACTGTGGGGGCACGTTC	miRNA	hsa-miR-371a-5p	mature	novel	non-templated	human	23	609	0	19	4	0	three_non-temp	three_prime	18	0	0	0
ACTCAAACTGTGGGGGCACT	miRNA	ssc-miR-371-5p	mature	known	templated	pig	20	122086	0	20	2	0	three_temp	three_prime	9	0	0	0
ACTCAAACTGTGGGGGCACTA	miRNA	ssc-miR-371-5p	mature	known	non-templated	pig	21	15171	0	20	2	0	three_non-temp	three_prime	32	0	0	0
ACTCAAACTGTGGGGGCACTAA	miRNA	hsa-miR-371a-5p	mature	novel	non-templated	human	22	2519	0	20	2	0	three_non-temp	three_prime	5	0	1	0
ACTCAAACTGTGGGGGCACTAAA	miRNA	hsa-miR-371a-5p	mature	novel	non-templated	human	23	1620	0	20	3	0	three_non-temp	three_prime	7	0	0	0
ACTCAAACTGTGGGGGCACTAAAA	miRNA	hsa-miR-371a-5p	mature	novel	non-templated	human	24	402	0	20	4	0	three_non-temp	three_prime	27	0	0	0
ACTCAAACTGTGGGGGCACTAAC	miRNA	hsa-miR-371a-5p	mature	novel	non-templated	human	23	410	0	20	3	0	three_non-temp	three_prime	26	0	0	0
ACTCAAACTGTGGGGGCACTAAG	miRNA	hsa-miR-371a-5p	mature	novel	non-templated	human	23	1073	0	20	3	0	three_non-temp	three_prime	13	0	0	0
ACTCAAACTGTGGGGGCACTAAT	miRNA	hsa-miR-371a-5p	mature	novel	non-templated	human	23	475	0	20	3	0	three_non-temp	three_prime	23	0	0	0
ACTCAAACTGTGGGGGCACTAC	miRNA	hsa-miR-371a-5p	mature	novel	non-templated	human	22	1125	0	20	2	0	three_non-temp	three_prime	12	0	0	0
ACTCAAACTGTGGGGGCACTAG	miRNA	hsa-miR-371a-5p	mature	novel	non-templated	human	22	1353	0	20	2	0	three_non-temp	three_prime	10	0	0	0
ACTCAAACTGTGGGGGCACTAGA	miRNA	hsa-miR-371a-5p	mature	novel	non-templated	human	23	616	0	20	3	0	three_non-temp	three_prime	17	0	0	0
ACTCAAACTGTGGGGGCACTAT	miRNA	hsa-miR-371a-5p	mature	novel	non-templated	human	22	1258	0	20	2	0	three_non-temp	three_prime	11	0	0	0
ACTCAAACTGTGGGGGCACTC	miRNA	ssc-miR-371-5p	mature	known	non-templated	pig	21	99870	0	20	2	0	three_non-temp	three_prime	10	0	0	0
ACTCAAACTGTGGGGGCACTCC	miRNA	hsa-miR-371a-5p	mature	novel	non-templated	human	22	795	0	20	2	0	three_non-temp	three_prime	16	0	0	0
ACTCAAACTGTGGGGGCACTCT	miRNA	hsa-miR-371a-5p	mature	novel	non-templated	human	22	3808	0	20	2	0	three_non-temp	three_prime	3	0	1	0
ACTCAAACTGTGGGGGCACTCTC	miRNA	hsa-miR-371a-5p	mature	novel	non-templated	human	23	1472	0	20	3	0	three_non-temp	three_prime	8	0	0	0
ACTCAAACTGTGGGGGCACTG	miRNA	ssc-miR-371-5p	mature	known	non-templated	pig	21	9847	0	20	2	0	three_non-temp	three_prime	36	0	0	0
ACTCAAACTGTGGGGGCACTGC	miRNA	hsa-miR-371a-5p	mature	novel	non-templated	human	22	467	0	20	2	0	three_non-temp	three_prime	24	0	0	0
ACTCAAACTGTGGGGGCACTGT	miRNA	hsa-miR-371a-5p	mature	novel	non-templated	human	22	4378	0	20	2	0	three_non-temp	three_prime	2	0	1	0
ACTCAAACTGTGGGGGCACTT	miRNA	ssc-miR-371-5p	mature	known	templated	pig	21	517081	0	21	1	0	three_temp	three_prime	3	0	1	0
ACTCAAACTGTGGGGGCACTTA	miRNA	ssc-miR-371-5p	mature	known	non-templated	pig	22	66695	0	21	1	0	three_non-temp	three_prime	12	0	0	0
ACTCAAACTGTGGGGGCACTTAA	miRNA	ssc-miR-371-5p	mature	known	non-templated	pig	23	15251	0	21	2	0	three_non-temp	three_prime	31	0	0	0
ACTCAAACTGTGGGGGCACTTAAA	miRNA	ssc-miR-371-5p	mature	known	non-templated	pig	24	8678	0	21	3	0	three_non-temp	three_prime	40	0	0	0
ACTCAAACTGTGGGGGCACTTAAAA	miRNA	ssc-miR-371-5p	mature	known	non-templated	pig	25	1099	0	21	4	0	three_non-temp	three_prime	88	0	0	0
ACTCAAACTGTGGGGGCACTTAAAG	miRNA	ssc-miR-371-5p	mature	known	non-templated	pig	25	528	0	21	4	0	three_non-temp	three_prime	118	0	0	0
ACTCAAACTGTGGGGGCACTTAAAT	miRNA	ssc-miR-371-5p	mature	known	non-templated	pig	25	427	0	21	4	0	three_non-temp	three_prime	130	0	0	0
ACTCAAACTGTGGGGGCACTTAAC	miRNA	ssc-miR-371-5p	mature	known	non-templated	pig	24	3150	0	21	3	0	three_non-temp	three_prime	58	0	0	0
ACTCAAACTGTGGGGGCACTTAAG	miRNA	ssc-miR-371-5p	mature	known	non-templated	pig	24	5109	0	21	3	0	three_non-temp	three_prime	49	0	0	0
ACTCAAACTGTGGGGGCACTTAAGA	miRNA	ssc-miR-371-5p	mature	known	non-templated	pig	25	313	0	21	4	0	three_non-temp	three_prime	137	0	0	0
ACTCAAACTGTGGGGGCACTTAAT	miRNA	ssc-miR-371-5p	mature	known	non-templated	pig	24	3703	0	21	3	0	three_non-temp	three_prime	55	0	0	0
ACTCAAACTGTGGGGGCACTTAC	miRNA	ssc-miR-371-5p	mature	known	non-templated	pig	23	7300	0	21	2	0	three_non-temp	three_prime	42	0	0	0
ACTCAAACTGTGGGGGCACTTACA	miRNA	ssc-miR-371-5p	mature	known	non-templated	pig	24	521	0	21	3	0	three_non-temp	three_prime	121	0	0	0
ACTCAAACTGTGGGGGCACTTAG	miRNA	ssc-miR-371-5p	mature	known	non-templated	pig	23	9548	0	21	2	0	three_non-temp	three_prime	37	0	0	0
ACTCAAACTGTGGGGGCACTTAGA	miRNA	ssc-miR-371-5p	mature	known	non-templated	pig	24	2402	0	21	3	0	three_non-temp	three_prime	63	0	0	0
ACTCAAACTGTGGGGGCACTTAGT	miRNA	ssc-miR-371-5p	mature	known	non-templated	pig	24	925	0	21	3	0	three_non-temp	three_prime	94	0	0	0
ACTCAAACTGTGGGGGCACTTAT	miRNA	ssc-miR-371-5p	mature	known	non-templated	pig	23	3695	0	21	2	0	three_non-temp	three_prime	56	0	0	0
ACTCAAACTGTGGGGGCACTTC	miRNA	ssc-miR-371-5p	mature	known	templated	pig	22	343450	0	21	1	0	three_temp	three_prime	5	0	1	0
ACTCAAACTGTGGGGGCACTTCA	miRNA	ssc-miR-371-5p	mature	known	non-templated	pig	23	487	0	21	2	0	three_non-temp	three_prime	124	0	0	0
ACTCAAACTGTGGGGGCACTTCC	miRNA	ssc-miR-371-5p	mature	known	templated	pig	23	1924	0	21	2	0	three_temp	three_prime	70	0	0	0
ACTCAAACTGTGGGGGCACTTCG	miRNA	ssc-miR-371-5p	mature	known	non-templated	pig	23	683	0	21	2	0	three_non-temp	three_prime	104	0	0	0
ACTCAAACTGTGGGGGCACTTCT	miRNA	ssc-miR-371-5p	mature	known	non-templated	pig	23	382	0	21	2	0	three_non-temp	three_prime	133	0	0	0
ACTCAAACTGTGGGGGCACTTG	miRNA	ssc-miR-371-5p	mature	known	non-templated	pig	22	44430	0	21	1	0	three_non-temp	three_prime	18	0	0	0
ACTCAAACTGTGGGGGCACTTGA	miRNA	ssc-miR-371-5p	mature	known	non-templated	pig	23	4224	0	21	2	0	three_non-temp	three_prime	51	0	0	0
ACTCAAACTGTGGGGGCACTTGAA	miRNA	ssc-miR-371-5p	mature	known	non-templated	pig	24	326	0	21	3	0	three_non-temp	three_prime	136	0	0	0
ACTCAAACTGTGGGGGCACTTGC	miRNA	ssc-miR-371-5p	mature	known	non-templated	pig	23	465	0	21	2	0	three_non-temp	three_prime	125	0	0	0
ACTCAAACTGTGGGGGCACTTGT	miRNA	ssc-miR-371-5p	mature	known	non-templated	pig	23	492	0	21	2	0	three_non-temp	three_prime	123	0	0	0
ACTCAAACTGTGGGGGCACTTT	miRNA	ssc-miR-371-5p	mature	known	templated	pig	22	2137786	0	22	0	1	mature	mature	1	1	1	0
ACTCAAACTGTGGGGGCACTTTA	miRNA	ssc-miR-371-5p	mature	known	non-templated	pig	23	190311	0	22	1	0	three_non-temp	three_prime	6	0	0	0
ACTCAAACTGTGGGGGCACTTTAA	miRNA	ssc-miR-371-5p	mature	known	non-templated	pig	24	51416	0	22	2	0	three_non-temp	three_prime	15	0	0	0
ACTCAAACTGTGGGGGCACTTTAAA	miRNA	ssc-miR-371-5p	mature	known	non-templated	pig	25	12508	0	22	3	0	three_non-temp	three_prime	34	0	0	0
ACTCAAACTGTGGGGGCACTTTAAAA	miRNA	ssc-miR-371-5p	mature	known	non-templated	pig	26	1597	0	22	4	0	three_non-temp	three_prime	79	0	0	0
ACTCAAACTGTGGGGGCACTTTAAAAA	miRNA	ssc-miR-371-5p	mature	known	non-templated	pig	27	572	0	22	5	0	three_non-temp	three_prime	112	0	0	0
ACTCAAACTGTGGGGGCACTTTAAAC	miRNA	ssc-miR-371-5p	mature	known	non-templated	pig	26	571	0	22	4	0	three_non-temp	three_prime	113	0	0	0
ACTCAAACTGTGGGGGCACTTTAAAG	miRNA	ssc-miR-371-5p	mature	known	non-templated	pig	26	846	0	22	4	0	three_non-temp	three_prime	98	0	0	0
ACTCAAACTGTGGGGGCACTTTAAAT	miRNA	ssc-miR-371-5p	mature	known	non-templated	pig	26	661	0	22	4	0	three_non-temp	three_prime	106	0	0	0
ACTCAAACTGTGGGGGCACTTTAAC	miRNA	ssc-miR-371-5p	mature	known	non-templated	pig	25	4013	0	22	3	0	three_non-temp	three_prime	53	0	0	0
ACTCAAACTGTGGGGGCACTTTAAG	miRNA	ssc-miR-371-5p	mature	known	non-templated	pig	25	7197	0	22	3	0	three_non-temp	three_prime	44	0	0	0
ACTCAAACTGTGGGGGCACTTTAAGA	miRNA	ssc-miR-371-5p	mature	known	non-templated	pig	26	445	0	22	4	0	three_non-temp	three_prime	129	0	0	0
ACTCAAACTGTGGGGGCACTTTAAT	miRNA	ssc-miR-371-5p	mature	known	non-templated	pig	25	8007	0	22	3	0	three_non-temp	three_prime	41	0	0	0
ACTCAAACTGTGGGGGCACTTTAC	miRNA	ssc-miR-371-5p	mature	known	non-templated	pig	24	5926	0	22	2	0	three_non-temp	three_prime	47	0	0	0
ACTCAAACTGTGGGGGCACTTTAG	miRNA	ssc-miR-371-5p	mature	known	non-templated	pig	24	26290	0	22	2	0	three_non-temp	three_prime	25	0	0	0
ACTCAAACTGTGGGGGCACTTTAGA	miRNA	ssc-miR-371-5p	mature	known	non-templated	pig	25	2456	0	22	3	0	three_non-temp	three_prime	62	0	0	0
ACTCAAACTGTGGGGGCACTTTAGC	miRNA	ssc-miR-371-5p	mature	known	non-templated	pig	25	354	0	22	3	0	three_non-temp	three_prime	135	0	0	0
ACTCAAACTGTGGGGGCACTTTAGT	miRNA	ssc-miR-371-5p	mature	known	non-templated	pig	25	1676	0	22	3	0	three_non-temp	three_prime	76	0	0	0
ACTCAAACTGTGGGGGCACTTTAT	miRNA	ssc-miR-371-5p	mature	known	non-templated	pig	24	9381	0	22	2	0	three_non-temp	three_prime	38	0	0	0
ACTCAAACTGTGGGGGCACTTTATT	miRNA	ssc-miR-371-5p	mature	known	non-templated	pig	25	706	0	22	3	0	three_non-temp	three_prime	103	0	0	0
ACTCAAACTGTGGGGGCACTTTC	miRNA	ssc-miR-371-5p	mature	known	templated	pig	23	735681	0	22	1	0	three_temp	three_prime	2	0	1	0
ACTCAAACTGTGGGGGCACTTTCA	miRNA	ssc-miR-371-5p	mature	known	non-templated	pig	24	46739	0	22	2	0	three_non-temp	three_prime	17	0	0	0
ACTCAAACTGTGGGGGCACTTTCAA	miRNA	ssc-miR-371-5p	mature	known	non-templated	pig	25	3276	0	22	3	0	three_non-temp	three_prime	57	0	0	0
ACTCAAACTGTGGGGGCACTTTCAAA	miRNA	ssc-miR-371-5p	mature	known	non-templated	pig	26	1795	0	22	4	0	three_non-temp	three_prime	73	0	0	0
ACTCAAACTGTGGGGGCACTTTCAAAA	miRNA	ssc-miR-371-5p	mature	known	non-templated	pig	27	523	0	22	5	0	three_non-temp	three_prime	120	0	0	0
ACTCAAACTGTGGGGGCACTTTCAAC	miRNA	ssc-miR-371-5p	mature	known	non-templated	pig	26	641	0	22	4	0	three_non-temp	three_prime	107	0	0	0
ACTCAAACTGTGGGGGCACTTTCAAG	miRNA	ssc-miR-371-5p	mature	known	non-templated	pig	26	680	0	22	4	0	three_non-temp	three_prime	105	0	0	0
ACTCAAACTGTGGGGGCACTTTCAAT	miRNA	ssc-miR-371-5p	mature	known	non-templated	pig	26	1151	0	22	4	0	three_non-temp	three_prime	86	0	0	0
ACTCAAACTGTGGGGGCACTTTCAC	miRNA	ssc-miR-371-5p	mature	known	non-templated	pig	25	2023	0	22	3	0	three_non-temp	three_prime	69	0	0	0
ACTCAAACTGTGGGGGCACTTTCAG	miRNA	ssc-miR-371-5p	mature	known	non-templated	pig	25	1517	0	22	3	0	three_non-temp	three_prime	80	0	0	0
ACTCAAACTGTGGGGGCACTTTCAGA	miRNA	ssc-miR-371-5p	mature	known	non-templated	pig	26	387	0	22	4	0	three_non-temp	three_prime	132	0	0	0
ACTCAAACTGTGGGGGCACTTTCAT	miRNA	ssc-miR-371-5p	mature	known	non-templated	pig	25	1668	0	22	3	0	three_non-temp	three_prime	77	0	0	0
ACTCAAACTGTGGGGGCACTTTCC	miRNA	ssc-miR-371-5p	mature	known	non-templated	pig	24	3776	0	22	2	0	three_non-temp	three_prime	54	0	0	0
ACTCAAACTGTGGGGGCACTTTCG	miRNA	ssc-miR-371-5p	mature	known	non-templated	pig	24	26959	0	22	2	0	three_non-temp	three_prime	22	0	0	0
ACTCAAACTGTGGGGGCACTTTCGA	miRNA	ssc-miR-371-5p	mature	known	non-templated	pig	25	2143	0	22	3	0	three_non-temp	three_prime	68	0	0	0
ACTCAAACTGTGGGGGCACTTTCGT	miRNA	ssc-miR-371-5p	mature	known	non-templated	pig	25	463	0	22	3	0	three_non-temp	three_prime	126	0	0	0
ACTCAAACTGTGGGGGCACTTTCT	miRNA	ssc-miR-371-5p	mature	known	templated	pig	24	15729	0	22	2	0	three_temp	three_prime	30	0	0	0
ACTCAAACTGTGGGGGCACTTTG	miRNA	ssc-miR-371-5p	mature	known	non-templated	pig	23	150022	0	22	1	0	three_non-temp	three_prime	7	0	0	0
ACTCAAACTGTGGGGGCACTTTGA	miRNA	ssc-miR-371-5p	mature	known	non-templated	pig	24	26425	0	22	2	0	three_non-temp	three_prime	24	0	0	0
ACTCAAACTGTGGGGGCACTTTGAA	miRNA	ssc-miR-371-5p	mature	known	non-templated	pig	25	555	0	22	3	0	three_non-temp	three_prime	115	0	0	0
ACTCAAACTGTGGGGGCACTTTGAAT	miRNA	ssc-miR-371-5p	mature	known	non-templated	pig	26	524	0	22	4	0	three_non-temp	three_prime	119	0	0	0
ACTCAAACTGTGGGGGCACTTTGAT	miRNA	ssc-miR-371-5p	mature	known	non-templated	pig	25	364	0	22	3	0	three_non-temp	three_prime	134	0	0	0
ACTCAAACTGTGGGGGCACTTTGC	miRNA	ssc-miR-371-5p	mature	known	non-templated	pig	24	613	0	22	2	0	three_non-temp	three_prime	109	0	0	0
ACTCAAACTGTGGGGGCACTTTGG	miRNA	ssc-miR-371-5p	mature	known	non-templated	pig	24	909	0	22	2	0	three_non-temp	three_prime	96	0	0	0
ACTCAAACTGTGGGGGCACTTTGT	miRNA	ssc-miR-371-5p	mature	known	non-templated	pig	24	2334	0	22	2	0	three_non-temp	three_prime	65	0	0	0
ACTCAAACTGTGGGGGCACTTTT	miRNA	ssc-miR-371-5p	mature	known	non-templated	pig	23	50474	0	22	1	0	three_non-temp	three_prime	16	0	0	0
ACTCAAACTGTGGGGGCACTTTTA	miRNA	ssc-miR-371-5p	mature	known	non-templated	pig	24	1185	0	22	2	0	three_non-temp	three_prime	85	0	0	0
ACTCAAACTGTGGGGGCACTTTTG	miRNA	ssc-miR-371-5p	mature	known	non-templated	pig	24	2249	0	22	2	0	three_non-temp	three_prime	66	0	0	0
ACTCAAACTGTGGGGGCACTTTTT	miRNA	ssc-miR-371-5p	mature	known	non-templated	pig	24	1124	0	22	2	0	three_non-temp	three_prime	87	0	0	0
ACTCAAACTGTGGGGGCAT	miRNA	ssc-miR-371-5p	mature	known	non-templated	pig	19	6555	0	18	4	0	three_non-temp	three_prime	45	0	0	0
ACTCAAACTGTGGGGGCG	miRNA	ssc-miR-371-5p	mature	known	non-templated	pig	18	853	0	17	5	0	three_non-temp	three_prime	97	0	0	0
ACTCAAACTGTGGGGGCT	miRNA	ssc-miR-371-5p	mature	known	non-templated	pig	18	512	0	17	5	0	three_non-temp	three_prime	122	0	0	0
ACTCAAACTGTGGGGGT	miRNA	ssc-miR-371-5p	mature	known	non-templated	pig	17	17749	0	16	6	0	three_non-temp	three_prime	29	0	0	0
ACTCGGCGTGGCGTCGGTCG	miRNA	ssc-miR-1307	mature	known	templated	pig	20	650	0	20	2	0	three_temp	three_prime	25	0	0	0
ACTCGGCGTGGCGTCGGTCGC	miRNA	ssc-miR-1307	mature	known	non-templated	pig	21	888	0	20	2	0	three_non-temp	three_prime	22	0	0	0
ACTCGGCGTGGCGTCGGTCGT	miRNA	ssc-miR-1307	mature	known	templated	pig	21	3900	0	21	1	0	three_temp	three_prime	12	0	0	0
ACTCGGCGTGGCGTCGGTCGTA	miRNA	ssc-miR-1307	mature	known	non-templated	pig	22	1179	0	21	1	0	three_non-temp	three_prime	18	0	0	0
ACTCGGCGTGGCGTCGGTCGTG	miRNA	ssc-miR-1307	mature	known	templated	pig	22	16339	0	22	0	1	mature	mature	3	0	1	0
ACTCGGCGTGGCGTCGGTCGTGA	miRNA	ssc-miR-1307	mature	known	non-templated	pig	23	8681	0	22	1	0	three_non-temp	three_prime	6	0	0	0
ACTCGGCGTGGCGTCGGTCGTGC	miRNA	ssc-miR-1307	mature	known	non-templated	pig	23	2568	0	22	1	0	three_non-temp	three_prime	14	0	0	0
ACTCGGCGTGGCGTCGGTCGTGG	miRNA	ssc-miR-1307	mature	known	templated	pig	23	92219	0	22	1	0	three_temp	three_prime	1	1	1	0
ACTCGGCGTGGCGTCGGTCGTGGA	miRNA	ssc-miR-1307	mature	known	non-templated	pig	24	4166	0	22	2	0	three_non-temp	three_prime	10	0	0	0
ACTCGGCGTGGCGTCGGTCGTGGAA	miRNA	ssc-miR-1307	mature	known	non-templated	pig	25	1178	0	22	3	0	three_non-temp	three_prime	19	0	0	0
ACTCGGCGTGGCGTCGGTCGTGGAAA	miRNA	ssc-miR-1307	mature	known	non-templated	pig	26	474	0	22	4	0	three_non-temp	three_prime	27	0	0	0
ACTCGGCGTGGCGTCGGTCGTGGT	miRNA	ssc-miR-1307	mature	known	templated	pig	24	1294	0	22	2	0	three_temp	three_prime	16	0	0	0
ACTCGGCGTGGCGTCGGTCGTGT	miRNA	ssc-miR-1307	mature	known	non-templated	pig	23	4044	0	22	1	0	three_non-temp	three_prime	11	0	0	0
ACTCTTTCCCTGTTGCACTAC	miRNA	hsa-miR-130b-5p	mature	novel	templated	human	21	3930	0	21	0	1	mature	mature	2	0	1	0
ACTCTTTCCCTGTTGCACTACA	miRNA	hsa-miR-130b-5p	mature	novel	non-templated	human	22	474	0	21	1	0	three_non-temp	three_prime	6	0	0	0
ACTCTTTCCCTGTTGCACTACC	miRNA	hsa-miR-130b-5p	mature	novel	non-templated	human	22	2417	0	21	1	0	three_non-temp	three_prime	3	0	1	0
ACTCTTTCCCTGTTGCACTACT	miRNA	hsa-miR-130b-5p	mature	novel	templated	human	22	10673	0	21	1	0	three_temp	three_prime	1	1	1	0
ACTCTTTCCCTGTTGCACTAT	miRNA	hsa-miR-130b-5p	mature	novel	non-templated	human	21	471	0	20	1	0	three_non-temp	three_prime	8	0	0	0
ACTGCCCTAAGTGCTCCTTCTG	miRNA	hsa-miR-18a-3p	mature	novel	templated	human	22	524	0	22	1	0	three_temp	three_prime	1	1	1	0
ACTGCCCTAAGTGCTCCTTCTGG	miRNA	hsa-miR-18a-3p	mature	novel	templated	human	23	424	0	23	0	1	mature	mature	2	0	1	0
ACTGCCGGGTAATGATGGA	miRNA	bta-miR-200c	mature	novel	templated	cattle	19	449	4	19	0	0	five_temp	five_prime	21	0	0	0
ACTGCCTGGTAATGATGAC	miRNA	hsa-miR-200b-3p	mature	novel	templated	human	19	3101	-4	18	1	0	both_temp	both	3	0	1	0
ACTGGACTTGGAGCCAGAAGG	miRNA	hsa-miR-378f	mature	novel	non-templated	human	21	589	0	20	1	0	three_non-temp	three_prime	3	0	1	0
ACTGGACTTGGAGCCAGAAGGT	miRNA	hsa-miR-378f	mature	novel	non-templated	human	22	800	0	20	2	0	three_non-temp	three_prime	2	0	1	0
ACTGGACTTGGAGTCAG	miRNA	ssc-miR-378b-3p	mature	known	templated	pig	17	677	0	17	4	0	three_temp	three_prime	13	0	0	0
ACTGGACTTGGAGTCAGA	miRNA	ssc-miR-378b-3p	mature	known	templated	pig	18	20969	0	18	3	0	three_temp	three_prime	1	1	1	0
ACTGGACTTGGAGTCAGAA	miRNA	ssc-miR-378b-3p	mature	known	templated	pig	19	20421	0	19	2	0	three_temp	three_prime	2	0	1	0
ACTGGACTTGGAGTCAGAAG	miRNA	ssc-miR-378b-3p	mature	known	templated	pig	20	10123	0	20	1	0	three_temp	three_prime	3	0	1	0
ACTGGACTTGGAGTCAGAAGA	miRNA	ssc-miR-378b-3p	mature	known	templated	pig	21	9952	0	20	1	0	three_temp	three_prime	4	0	1	0
ACTGGACTTGGAGTCAGAAGAC	miRNA	ssc-miR-378b-3p	mature	known	templated	pig	22	1449	0	20	2	0	three_temp	three_prime	11	0	0	0
ACTGGACTTGGAGTCAGAAGC	miRNA	ssc-miR-378b-3p	mature	known	non-templated	pig	21	2733	0	20	1	0	three_non-temp	three_prime	7	0	0	0
ACTGGACTTGGAGTCAGAAGCC	miRNA	ssc-miR-378b-3p	mature	known	non-templated	pig	22	446	0	20	2	0	three_non-temp	three_prime	15	0	0	0
ACTGGACTTGGAGTCAGAAGG	miRNA	ssc-miR-378	mature	known	templated	pig	21	160326	0	21	1	0	three_temp	three_prime	4	0	1	0
ACTGGACTTGGAGTCAGAAGGA	miRNA	ssc-miR-378	mature	known	non-templated	pig	22	34897	0	21	1	0	three_non-temp	three_prime	8	0	0	0
ACTGGACTTGGAGTCAGAAGGAA	miRNA	ssc-miR-378	mature	known	non-templated	pig	23	594	0	21	2	0	three_non-temp	three_prime	30	0	0	0
ACTGGACTTGGAGTCAGAAGGC	miRNA	ssc-miR-378	mature	known	templated	pig	22	973615	0	22	0	1	mature	mature	1	1	1	0
ACTGGACTTGGAGTCAGAAGGCA	miRNA	ssc-miR-378	mature	known	non-templated	pig	23	72404	0	22	1	0	three_non-temp	three_prime	5	0	1	0
ACTGGACTTGGAGTCAGAAGGCAA	miRNA	ssc-miR-378	mature	known	non-templated	pig	24	3350	0	22	2	0	three_non-temp	three_prime	18	0	0	0
ACTGGACTTGGAGTCAGAAGGCAC	miRNA	ssc-miR-378	mature	known	non-templated	pig	24	443	0	22	2	0	three_non-temp	three_prime	34	0	0	0
ACTGGACTTGGAGTCAGAAGGCAG	miRNA	ssc-miR-378	mature	known	non-templated	pig	24	1596	0	22	2	0	three_non-temp	three_prime	23	0	0	0
ACTGGACTTGGAGTCAGAAGGCAT	miRNA	ssc-miR-378	mature	known	non-templated	pig	24	1350	0	22	2	0	three_non-temp	three_prime	24	0	0	0
ACTGGACTTGGAGTCAGAAGGCC	miRNA	ssc-miR-378	mature	known	templated	pig	23	4797	0	22	1	0	three_temp	three_prime	16	0	0	0
ACTGGACTTGGAGTCAGAAGGCG	miRNA	ssc-miR-378	mature	known	non-templated	pig	23	9246	0	22	1	0	three_non-temp	three_prime	13	0	0	0
ACTGGACTTGGAGTCAGAAGGCGA	miRNA	ssc-miR-378	mature	known	non-templated	pig	24	992	0	22	2	0	three_non-temp	three_prime	27	0	0	0
ACTGGACTTGGAGTCAGAAGGCT	miRNA	ssc-miR-378	mature	known	templated	pig	23	12371	0	22	1	0	three_temp	three_prime	11	0	0	0
ACTGGACTTGGAGTCAGAAGGG	miRNA	ssc-miR-378	mature	known	non-templated	pig	22	3164	0	21	1	0	three_non-temp	three_prime	20	0	0	0
ACTGGACTTGGAGTCAGAAGGT	miRNA	ssc-miR-378	mature	known	non-templated	pig	22	217404	0	21	1	0	three_non-temp	three_prime	3	0	1	0
ACTGGACTTGGAGTCAGAAGT	miRNA	ssc-miR-378b-3p	mature	known	templated	pig	21	1777	0	21	0	1	mature	mature	10	0	0	0
ACTGGACTTGGAGTCAGGAGG	miRNA	hsa-miR-378e	mature	novel	non-templated	human	21	658	0	19	2	0	three_non-temp	three_prime	3	0	1	0
ACTGGACTTGGAGTCAGGAGGT	miRNA	hsa-miR-378e	mature	novel	non-templated	human	22	1049	0	19	3	0	three_non-temp	three_prime	2	0	1	0
ACTGGGCTTGGAGTCAGAAGG	miRNA	hsa-miR-378g	mature	novel	non-templated	human	21	606	0	20	1	0	three_non-temp	three_prime	3	0	1	0
ACTGGGCTTGGAGTCAGAAGGT	miRNA	hsa-miR-378g	mature	novel	non-templated	human	22	922	0	20	2	0	three_non-temp	three_prime	2	0	1	0
ACTGTAAACGCTTTCTGATG	miRNA	hsa-miR-3607-3p	mature	novel	templated	human	20	1132	0	20	0	1	mature	mature	2	0	1	0
ACTGTAAACGCTTTCTGATGTA	miRNA	hsa-miR-3607-3p	mature	novel	templated	human	22	668	0	20	2	0	three_temp	three_prime	5	0	1	0
ACTGTCTGGTAACGATGTT	miRNA	bta-miR-200a	mature	novel	templated	cattle	19	1595	4	19	0	0	five_temp	five_prime	15	0	0	0
ACTTAAACGTGGATGTACT	miRNA	hsa-miR-302a-5p	mature	novel	templated	human	19	1516	0	19	4	0	three_temp	three_prime	25	0	0	0
ACTTAAACGTGGATGTACTTA	miRNA	hsa-miR-302a-5p	mature	novel	non-templated	human	21	533	0	20	3	0	three_non-temp	three_prime	37	0	0	0
ACTTAAACGTGGATGTACTTG	miRNA	hsa-miR-302a-5p	mature	novel	templated	human	21	11556	0	21	2	0	three_temp	three_prime	8	0	0	0
ACTTAAACGTGGATGTACTTGA	miRNA	hsa-miR-302a-5p	mature	novel	non-templated	human	22	1402	0	21	2	0	three_non-temp	three_prime	27	0	0	0
ACTTAAACGTGGATGTACTTGC	miRNA	hsa-miR-302a-5p	mature	novel	templated	human	22	42429	0	22	1	0	three_temp	three_prime	4	0	1	0
ACTTAAACGTGGATGTACTTGCA	miRNA	hsa-miR-302a-5p	mature	novel	non-templated	human	23	3819	0	22	1	0	three_non-temp	three_prime	16	0	0	0
ACTTAAACGTGGATGTACTTGCC	miRNA	hsa-miR-302a-5p	mature	novel	non-templated	human	23	12647	0	22	1	0	three_non-temp	three_prime	7	0	0	0
ACTTAAACGTGGATGTACTTGCG	miRNA	hsa-miR-302a-5p	mature	novel	non-templated	human	23	1745	0	22	1	0	three_non-temp	three_prime	22	0	0	0
ACTTAAACGTGGATGTACTTGCT	miRNA	hsa-miR-302a-5p	mature	novel	templated	human	23	54425	0	23	0	1	mature	mature	2	0	1	0
ACTTAAACGTGGATGTACTTGCTA	miRNA	hsa-miR-302a-5p	mature	novel	non-templated	human	24	322	0	23	1	0	three_non-temp	three_prime	40	0	0	0
ACTTAAACGTGGATGTACTTGCTT	miRNA	hsa-miR-302a-5p	mature	novel	templated	human	24	492	0	23	1	0	three_temp	three_prime	38	0	0	0
ACTTAAACGTGGATGTACTTGT	miRNA	hsa-miR-302a-5p	mature	novel	non-templated	human	22	9651	0	21	2	0	three_non-temp	three_prime	12	0	0	0
AGAGATCAGAGGCGCAGAGC	miRNA	bta-miR-6529a	mature	novel	non-templated	cattle	20	482	-1	19	1	0	both_non-temp	both	5	0	1	0
AGAGATCAGAGGCGCAGAGT	miRNA	bta-miR-6529a	mature	novel	templated	cattle	20	1961	1	20	0	0	five_temp	five_prime	3	0	1	0
AGAGGTAGTAGGTTGCAT	miRNA	ssc-let-7d-5p	mature	known	templated	pig	18	285	0	18	4	0	three_temp	three_prime	8	0	0	0
AGAGGTAGTAGGTTGCATAGC	miRNA	ssc-let-7d-5p	mature	known	non-templated	pig	21	355	0	20	2	0	three_non-temp	three_prime	5	0	1	0
AGAGGTAGTAGGTTGCATAGT	miRNA	ssc-let-7d-5p	mature	known	templated	pig	21	1789	0	21	1	0	three_temp	three_prime	2	0	1	0
AGAGGTAGTAGGTTGCATAGTC	miRNA	ssc-let-7d-5p	mature	known	non-templated	pig	22	1065	0	21	1	0	three_non-temp	three_prime	3	0	1	0
AGAGGTAGTAGGTTGCATAGTT	miRNA	ssc-let-7d-5p	mature	known	templated	pig	22	5198	0	22	0	1	mature	mature	1	1	1	0
AGAGGTAGTAGGTTGCATAGTTT	miRNA	ssc-let-7d-5p	mature	known	templated	pig	23	346	0	22	1	0	three_temp	three_prime	6	0	0	0
AGAGTTGAGTCTGGACGTCCCG	miRNA	ssc-miR-219a	mature	known	templated	pig	22	1140	0	22	0	1	mature	mature	1	1	1	0
AGCACCATCTGAAATCGGTTA	miRNA	ssc-miR-29a	mature	known	templated	pig	21	394	2	21	0	0	five_temp	five_prime	6	0	0	0
AGCAGCAATTCATGTTTTGAA	miRNA	ssc-miR-424-5p	mature	known	templated	pig	21	409	1	21	0	0	five_temp	five_prime	4	0	1	0
AGCAGCACGTAAATATTGGCG	miRNA	ssc-miR-16	mature	known	templated	pig	21	319	1	21	0	0	five_temp	five_prime	5	0	1	0
AGCAGCATTGTACAGGGCT	miRNA	ssc-miR-107	mature	known	templated	pig	19	626	0	19	4	0	three_temp	three_prime	5	0	1	0
AGCAGCATTGTACAGGGCTAT	miRNA	ssc-miR-107	mature	known	templated	pig	21	1254	0	21	2	0	three_temp	three_prime	3	0	1	0
AGCAGCATTGTACAGGGCTATA	miRNA	ssc-miR-107	mature	known	non-templated	pig	22	774	0	21	2	0	three_non-temp	three_prime	4	0	1	0
AGCAGCATTGTACAGGGCTATC	miRNA	ssc-miR-107	mature	known	templated	pig	22	1331	0	22	1	0	three_temp	three_prime	2	0	1	0
AGCAGCATTGTACAGGGCTATCA	miRNA	ssc-miR-107	mature	known	templated	pig	23	1399	0	23	0	1	mature	mature	1	1	1	0
AGCAGCATTGTACAGGGCTATG	miRNA	ssc-miR-103	mature	known	templated	pig	22	13926	0	22	1	0	three_temp	three_prime	2	0	1	0
AGCAGCATTGTACAGGGCTATGA	miRNA	ssc-miR-103	mature	known	templated	pig	23	21637	0	23	0	1	mature	mature	1	1	1	0
AGCAGCATTGTACAGGGCTATGAA	miRNA	ssc-miR-103	mature	known	templated	pig	24	888	0	23	1	0	three_temp	three_prime	5	0	1	0
AGCAGCATTGTACAGGGCTATGAT	miRNA	ssc-miR-103	mature	known	non-templated	pig	24	877	0	23	1	0	three_non-temp	three_prime	6	0	0	0
AGCAGCATTGTACAGGGCTATGG	miRNA	ssc-miR-103	mature	known	non-templated	pig	23	436	0	22	1	0	three_non-temp	three_prime	8	0	0	0
AGCAGCATTGTACAGGGCTATGT	miRNA	ssc-miR-103	mature	known	non-templated	pig	23	869	0	22	1	0	three_non-temp	three_prime	7	0	0	0
AGCAGCATTGTACAGGGCTATT	miRNA	ssc-miR-107	mature	known	non-templated	pig	22	239	0	21	2	0	three_non-temp	three_prime	7	0	0	0
AGCAGCGGGAACAGTACT	miRNA	ssc-miR-503	mature	known	templated	pig	18	913	-1	18	-4	0	both_temp	both	10	0	0	0
AGCAGCGGGAACAGTACTG	miRNA	ssc-miR-503	mature	known	templated	pig	19	2150	-1	19	-3	0	both_temp	both	5	0	1	0
AGCAGCGGGAACAGTACTGCAG	miRNA	ssc-miR-503	mature	known	templated	pig	22	796	1	22	0	0	five_temp	five_prime	12	0	0	0
AGCAGCGGGAACAGTACTGCAGA	miRNA	ssc-miR-503	mature	known	non-templated	pig	23	548	-1	22	1	0	both_non-temp	both	14	0	0	0
AGCTACATCTGGCTACTGGGTCT	miRNA	ssc-miR-222	mature	known	templated	pig	23	559	0	23	1	0	three_temp	three_prime	7	0	0	0
AGCTACATCTGGCTACTGGGTCTC	miRNA	ssc-miR-222	mature	known	templated	pig	24	5361	0	24	0	1	mature	mature	1	1	1	0
AGCTACATCTGGCTACTGGGTCTCA	miRNA	ssc-miR-222	mature	known	non-templated	pig	25	667	0	24	1	0	three_non-temp	three_prime	5	0	1	0
AGCTACATCTGGCTACTGGGTCTCC	miRNA	ssc-miR-222	mature	known	non-templated	pig	25	609	0	24	1	0	three_non-temp	three_prime	6	0	0	0
AGCTACATCTGGCTACTGGGTCTCT	miRNA	ssc-miR-222	mature	known	templated	pig	25	1423	0	24	1	0	three_temp	three_prime	2	0	1	0
AGCTACATCTGGCTACTGGGTCTT	miRNA	ssc-miR-222	mature	known	non-templated	pig	24	742	0	23	1	0	three_non-temp	three_prime	4	0	1	0
AGCTACATTGTCTGCTGGGTTT	miRNA	ssc-miR-221-3p	mature	known	templated	pig	22	1059	0	22	0	1	mature	mature	2	0	1	0
AGCTACATTGTCTGCTGGGTTTC	miRNA	ssc-miR-221-3p	mature	known	templated	pig	23	1521	0	22	1	0	three_temp	three_prime	1	1	1	0
AGCTACATTGTCTGCTGGGTTTCT	miRNA	ssc-miR-221-3p	mature	known	non-templated	pig	24	476	0	22	2	0	three_non-temp	three_prime	3	0	1	0
AGCTACATTGTCTGCTGGGTTTT	miRNA	ssc-miR-221-3p	mature	known	non-templated	pig	23	334	0	22	1	0	three_non-temp	three_prime	4	0	1	0
AGCTCGGTCTGAGGCCCCT	miRNA	ssc-miR-423-3p	mature	known	templated	pig	19	732	0	19	4	0	three_temp	three_prime	27	0	0	0
AGCTCGGTCTGAGGCCCCTA	miRNA	ssc-miR-423-3p	mature	known	non-templated	pig	20	530	0	19	4	0	three_non-temp	three_prime	33	0	0	0
AGCTCGGTCTGAGGCCCCTC	miRNA	ssc-miR-423-3p	mature	known	templated	pig	20	23178	0	20	3	0	three_temp	three_prime	4	0	1	0
AGCTCGGTCTGAGGCCCCTCA	miRNA	ssc-miR-423-3p	mature	known	templated	pig	21	3039	0	21	2	0	three_temp	three_prime	14	0	0	0
AGCTCGGTCTGAGGCCCCTCAA	miRNA	ssc-miR-423-3p	mature	known	non-templated	pig	22	639	0	21	2	0	three_non-temp	three_prime	28	0	0	0
AGCTCGGTCTGAGGCCCCTCAG	miRNA	ssc-miR-423-3p	mature	known	templated	pig	22	12987	0	22	1	0	three_temp	three_prime	6	0	0	0
AGCTCGGTCTGAGGCCCCTCAGA	miRNA	ssc-miR-423-3p	mature	known	non-templated	pig	23	4838	0	22	1	0	three_non-temp	three_prime	9	0	0	0
AGCTCGGTCTGAGGCCCCTCAGAA	miRNA	ssc-miR-423-3p	mature	known	non-templated	pig	24	624	0	22	2	0	three_non-temp	three_prime	29	0	0	0
AGCTCGGTCTGAGGCCCCTCAGC	miRNA	ssc-miR-423-3p	mature	known	non-templated	pig	23	28767	0	22	1	0	three_non-temp	three_prime	2	0	1	0
AGCTCGGTCTGAGGCCCCTCAGG	miRNA	ssc-miR-423-3p	mature	known	non-templated	pig	23	3166	0	22	1	0	three_non-temp	three_prime	13	0	0	0
AGCTCGGTCTGAGGCCCCTCAGT	miRNA	ssc-miR-423-3p	mature	known	templated	pig	23	142659	0	23	0	1	mature	mature	1	1	1	0
AGCTCGGTCTGAGGCCCCTCAGTA	miRNA	ssc-miR-423-3p	mature	known	non-templated	pig	24	9026	0	23	1	0	three_non-temp	three_prime	7	0	0	0
AGCTCGGTCTGAGGCCCCTCAGTAA	miRNA	ssc-miR-423-3p	mature	known	non-templated	pig	25	478	0	23	2	0	three_non-temp	three_prime	37	0	0	0
AGCTCGGTCTGAGGCCCCTCAGTAG	miRNA	ssc-miR-423-3p	mature	known	non-templated	pig	25	1223	0	23	2	0	three_non-temp	three_prime	24	0	0	0
AGCTCGGTCTGAGGCCCCTCAGTC	miRNA	ssc-miR-423-3p	mature	known	templated	pig	24	526	0	23	1	0	three_temp	three_prime	34	0	0	0
AGCTCGGTCTGAGGCCCCTCAGTG	miRNA	ssc-miR-423-3p	mature	known	non-templated	pig	24	769	0	23	1	0	three_non-temp	three_prime	26	0	0	0
AGCTCGGTCTGAGGCCCCTCAGTT	miRNA	ssc-miR-423-3p	mature	known	non-templated	pig	24	2389	0	23	1	0	three_non-temp	three_prime	16	0	0	0
AGCTCGGTCTGAGGCCCCTT	miRNA	ssc-miR-423-3p	mature	known	non-templated	pig	20	2971	0	19	4	0	three_non-temp	three_prime	15	0	0	0
AGCTGCCAGTTGAAGAACT	miRNA	ssc-miR-22-3p	mature	known	templated	pig	19	951	-1	19	-2	0	both_temp	both	14	0	0	0
AGCTGCCAGTTGAAGAACTGA	miRNA	ssc-miR-22-3p	mature	known	non-templated	pig	21	1294	-1	20	1	0	both_non-temp	both	11	0	0	0
AGCTGCCAGTTGAAGAACTGC	miRNA	ssc-miR-22-3p	mature	known	non-templated	pig	21	8803	-1	20	1	0	both_non-temp	both	4	0	1	0
AGCTGCCAGTTGAAGAACTGG	miRNA	ssc-miR-22-3p	mature	known	non-templated	pig	21	805	-1	20	1	0	both_non-temp	both	15	0	0	0
AGCTGCCAGTTGAAGAACTGT	miRNA	ssc-miR-22-3p	mature	known	templated	pig	21	40520	1	21	0	0	five_temp	five_prime	3	0	1	0
AGCTGCCAGTTGAAGAACTGTA	miRNA	ssc-miR-22-3p	mature	known	non-templated	pig	22	692	-1	21	1	0	both_non-temp	both	16	0	0	0
AGCTTATCAGACTGATG	miRNA	ssc-miR-21	mature	known	templated	pig	17	3078	-1	17	-4	0	both_temp	both	28	0	0	0
AGCTTATCAGACTGATGC	miRNA	ssc-miR-21	mature	known	non-templated	pig	18	453	-1	17	-4	0	both_non-temp	both	64	0	0	0
AGCTTATCAGACTGATGT	miRNA	ssc-miR-21	mature	known	templated	pig	18	2237	-1	18	-3	0	both_temp	both	33	0	0	0
AGCTTATCAGACTGATGTT	miRNA	ssc-miR-21	mature	known	templated	pig	19	1447	-1	19	-2	0	both_temp	both	41	0	0	0
AGCTTATCAGACTGATGTTA	miRNA	ssc-miR-21	mature	known	non-templated	pig	20	1032	-1	19	-2	0	both_non-temp	both	49	0	0	0
AGCTTATCAGACTGATGTTG	miRNA	ssc-miR-21	mature	known	templated	pig	20	18424	-1	20	-1	0	both_temp	both	13	0	0	0
AGCTTATCAGACTGATGTTGA	miRNA	ssc-miR-21	mature	known	templated	pig	21	23281	1	21	0	0	five_temp	five_prime	10	0	0	0
AGCTTATCAGACTGATGTTGAA	miRNA	ssc-miR-21	mature	known	non-templated	pig	22	10105	-1	21	1	0	both_non-temp	both	19	0	0	0
AGCTTATCAGACTGATGTTGACC	miRNA	bta-miR-21-5p	mature	novel	non-templated	cattle	23	26462	-1	22	1	0	both_non-temp	both	3	0	1	0
AGCTTATCAGACTGATGTTGACG	miRNA	bta-miR-21-5p	mature	novel	non-templated	cattle	23	4241	-1	22	1	0	both_non-temp	both	4	0	1	0
AGCTTATCAGACTGATGTTGACT	miRNA	bta-miR-21-5p	mature	novel	templated	cattle	23	52071	1	23	0	0	five_temp	five_prime	2	0	1	0
AGCTTATCAGACTGATGTTGAG	miRNA	ssc-miR-21	mature	known	non-templated	pig	22	1018	-1	21	1	0	both_non-temp	both	50	0	0	0
AGCTTATCAGACTGATGTTGAT	miRNA	ssc-miR-21	mature	known	non-templated	pig	22	95077	-1	21	1	0	both_non-temp	both	8	0	0	0
AGCTTATCAGACTGATGTTGCC	miRNA	ssc-miR-21	mature	known	non-templated	pig	22	2839	-1	20	2	0	both_non-temp	both	29	0	0	0
AGCTTATCAGACTGATGTTGCT	miRNA	ssc-miR-21	mature	known	non-templated	pig	22	564	-1	20	2	0	both_non-temp	both	60	0	0	0
AGCTTATCAGACTGATGTTGG	miRNA	ssc-miR-21	mature	known	non-templated	pig	21	580	-1	20	1	0	both_non-temp	both	57	0	0	0
AGCTTATCAGACTGATGTTGGC	miRNA	ssc-miR-21	mature	known	non-templated	pig	22	5131	-1	20	2	0	both_non-temp	both	23	0	0	0
AGCTTATCAGACTGATGTTGGT	miRNA	ssc-miR-21	mature	known	non-templated	pig	22	1068	-1	20	2	0	both_non-temp	both	47	0	0	0
AGCTTATCAGACTGATGTTGT	miRNA	ssc-miR-21	mature	known	non-templated	pig	21	517	-1	20	1	0	both_non-temp	both	61	0	0	0
AGCTTATCAGACTGATGTTGTC	miRNA	ssc-miR-21	mature	known	non-templated	pig	22	2034	-1	20	2	0	both_non-temp	both	35	0	0	0
AGGAGCTCACAGTCTATTG	miRNA	ssc-miR-28-5p	mature	known	templated	pig	19	620	-1	19	-2	0	both_temp	both	7	0	0	0
AGGAGCTCACAGTCTATTGAG	miRNA	ssc-miR-28-5p	mature	known	templated	pig	21	1819	1	21	0	0	five_temp	five_prime	4	0	1	0
AGGAGCTCACAGTCTATTGAGA	miRNA	ssc-miR-28-5p	mature	known	non-templated	pig	22	537	-1	21	1	0	both_non-temp	both	8	0	0	0
AGGCAAGATGCTGGCATAGCTG	miRNA	ssc-miR-31	mature	known	templated	pig	22	450	0	22	0	1	mature	mature	2	0	1	0
AGGCAAGATGCTGGCATAGCTGT	miRNA	ssc-miR-31	mature	known	templated	pig	23	753	0	22	1	0	three_temp	three_prime	1	1	1	0
AGGCAGTGTAATTAGCTGATTG	miRNA	bta-miR-34b	mature	novel	templated	cattle	22	454	0	22	0	1	mature	mature	3	0	1	0
AGGCAGTGTAATTAGCTGATTGT	miRNA	bta-miR-34b	mature	novel	templated	cattle	23	524	0	22	1	0	three_temp	three_prime	2	0	1	0
AGGCAGTGTAGTTAGCTGA	miRNA	ssc-miR-34c	mature	known	templated	pig	19	1884	0	19	4	0	three_temp	three_prime	12	0	0	0
AGGCAGTGTAGTTAGCTGAC	miRNA	ssc-miR-34c	mature	known	non-templated	pig	20	593	0	19	4	0	three_non-temp	three_prime	18	0	0	0
AGGCAGTGTAGTTAGCTGAT	miRNA	ssc-miR-34c	mature	known	templated	pig	20	2820	0	20	3	0	three_temp	three_prime	10	0	0	0
AGGCAGTGTAGTTAGCTGATA	miRNA	ssc-miR-34c	mature	known	non-templated	pig	21	379	0	20	3	0	three_non-temp	three_prime	22	0	0	0
AGGCAGTGTAGTTAGCTGATC	miRNA	ssc-miR-34c	mature	known	non-templated	pig	21	4014	0	20	3	0	three_non-temp	three_prime	7	0	0	0
AGGCAGTGTAGTTAGCTGATT	miRNA	ssc-miR-34c	mature	known	templated	pig	21	24109	0	21	2	0	three_temp	three_prime	2	0	1	0
AGGCAGTGTAGTTAGCTGATTA	miRNA	ssc-miR-34c	mature	known	non-templated	pig	22	848	0	21	2	0	three_non-temp	three_prime	15	0	0	0
AGGCAGTGTAGTTAGCTGATTG	miRNA	ssc-miR-34c	mature	known	templated	pig	22	20449	0	22	1	0	three_temp	three_prime	3	0	1	0
AGGCAGTGTAGTTAGCTGATTGA	miRNA	ssc-miR-34c	mature	known	non-templated	pig	23	3253	0	22	1	0	three_non-temp	three_prime	9	0	0	0
AGGCAGTGTAGTTAGCTGATTGC	miRNA	ssc-miR-34c	mature	known	templated	pig	23	42592	0	23	0	1	mature	mature	1	1	1	0
AGGCAGTGTAGTTAGCTGATTGCA	miRNA	ssc-miR-34c	mature	known	non-templated	pig	24	1515	0	23	1	0	three_non-temp	three_prime	13	0	0	0
AGGCAGTGTAGTTAGCTGATTGCT	miRNA	ssc-miR-34c	mature	known	templated	pig	24	560	0	23	1	0	three_temp	three_prime	19	0	0	0
AGGCAGTGTAGTTAGCTGATTGT	miRNA	ssc-miR-34c	mature	known	non-templated	pig	23	14129	0	22	1	0	three_non-temp	three_prime	4	0	1	0
AGGCAGTGTATTGTTAGCTGGC	miRNA	bta-miR-449b	mature	novel	templated	cattle	22	447	0	22	0	1	mature	mature	2	0	1	0
AGGCGGAGACTTGGGCAATTGC	miRNA	hsa-miR-25-5p	mature	novel	templated	human	22	576	0	21	1	0	three_temp	three_prime	2	0	1	0
AGGCGGAGACTTGGGCAATTGCC	miRNA	hsa-miR-25-5p	mature	novel	non-templated	human	23	573	0	21	2	0	three_non-temp	three_prime	3	0	1	0
AGGCGGAGACTTGGGCAATTGCT	miRNA	hsa-miR-25-5p	mature	novel	templated	human	23	2494	0	21	2	0	three_temp	three_prime	1	1	1	0
AGGGACGGGACGCGGTGCAGTGTT	miRNA	ssc-miR-92b-5p	mature	known	templated	pig	24	414	0	24	0	1	mature	mature	1	1	1	0
AGGGACTTTCAGGGGCAGCTGTG	miRNA	ssc-miR-365-5p	mature	known	templated	pig	23	1088	-1	22	1	0	both_temp	both	1	1	1	0
AGGGGCTGGCTTTCCTCTGGT	miRNA	hsa-miR-185-3p	mature	novel	templated	human	21	994	0	21	1	0	three_temp	three_prime	1	1	1	0
AGGGTTGGGCGGAGGCTTTC	miRNA	ssc-miR-296-3p	mature	known	templated	pig	20	576	0	20	1	0	three_temp	three_prime	8	0	0	0
AGGGTTGGGCGGAGGCTTTCA	miRNA	ssc-miR-296-3p	mature	known	non-templated	pig	21	485	0	20	1	0	three_non-temp	three_prime	10	0	0	0
AGGGTTGGGCGGAGGCTTTCC	miRNA	ssc-miR-296-3p	mature	known	templated	pig	21	11140	0	21	0	1	mature	mature	2	0	1	0
AGGGTTGGGCGGAGGCTTTCCA	miRNA	ssc-miR-296-3p	mature	known	non-templated	pig	22	892	0	21	1	0	three_non-temp	three_prime	7	0	0	0
AGGGTTGGGCGGAGGCTTTCCC	miRNA	ssc-miR-296-3p	mature	known	non-templated	pig	22	2838	0	21	1	0	three_non-temp	three_prime	3	0	1	0
AGGGTTGGGCGGAGGCTTTCCG	miRNA	ssc-miR-296-3p	mature	known	non-templated	pig	22	438	0	21	1	0	three_non-temp	three_prime	11	0	0	0
AGGGTTGGGCGGAGGCTTTCCT	miRNA	ssc-miR-296-3p	mature	known	templated	pig	22	11794	0	21	1	0	three_temp	three_prime	1	1	1	0
AGGGTTGGGCGGAGGCTTTCT	miRNA	ssc-miR-296-3p	mature	known	non-templated	pig	21	2100	0	20	1	0	three_non-temp	three_prime	6	0	0	0
AGGTAGTTTCATGTTGTTGGG	miRNA	ssc-miR-196a	mature	known	templated	pig	21	599	1	21	0	0	five_temp	five_prime	3	0	1	0
AGGTTGGGATCGGTTGCAATGC	miRNA	hsa-miR-92a-1-5p	mature	novel	templated	human	22	597	0	22	1	0	three_temp	three_prime	4	0	1	0
AGGTTGGGATCGGTTGCAATGCA	miRNA	hsa-miR-92a-1-5p	mature	novel	non-templated	human	23	376	0	22	1	0	three_non-temp	three_prime	7	0	0	0
AGGTTGGGATCGGTTGCAATGCC	miRNA	hsa-miR-92a-1-5p	mature	novel	non-templated	human	23	1924	0	22	1	0	three_non-temp	three_prime	3	0	1	0
AGGTTGGGATCGGTTGCAATGCT	miRNA	hsa-miR-92a-1-5p	mature	novel	templated	human	23	8377	0	23	0	1	mature	mature	1	1	1	0
AGTAAGTGCTTCCATGTTTTAG	miRNA	bta-miR-302d	mature	novel	templated	cattle	22	376	2	20	1	0	both_temp	both	32	0	0	0
AGTGCTTCCATGTTTCAGTGG	miRNA	bta-miR-302c	mature	novel	templated	cattle	21	1123	2	21	0	0	five_temp	five_prime	13	0	0	0
AGTGCTTCCATGTTTCAGTGGC	miRNA	bta-miR-302c	mature	novel	non-templated	cattle	22	434	-2	21	1	0	both_non-temp	both	23	0	0	0
AGTGCTTCCATGTTTCAGTGGT	miRNA	bta-miR-302c	mature	novel	non-templated	cattle	22	1943	-2	21	1	0	both_non-temp	both	11	0	0	0
AGTGCTTCCATGTTTTAGT	miRNA	bta-miR-302d	mature	novel	templated	cattle	19	1358	2	19	0	0	five_temp	five_prime	19	0	0	0
AGTGCTTCCATGTTTTAGTAG	miRNA	bta-miR-302b	mature	novel	templated	cattle	21	4670	2	21	0	0	five_temp	five_prime	11	0	0	0
AGTGCTTCCATGTTTTAGTAGA	miRNA	bta-miR-302b	mature	novel	templated	cattle	22	2740	-2	21	1	0	both_temp	both	13	0	0	0
AGTGCTTCCATGTTTTAGTGA	miRNA	bta-miR-302a	mature	novel	templated	cattle	21	2187	1	21	0	0	five_temp	five_prime	22	0	0	0
AGTGCTTCCATGTTTTAGTGT	miRNA	bta-miR-302a	mature	novel	non-templated	cattle	21	1028	-1	20	1	0	both_non-temp	both	29	0	0	0
AGTGGTTTTACCCTATGGTAG	miRNA	ssc-miR-140-5p	mature	known	templated	pig	21	1241	0	21	0	1	mature	mature	2	0	1	0
AGTTCTTCAGTGGCAAGCTTT	miRNA	ssc-miR-22-5p	mature	known	templated	pig	21	1749	0	21	1	0	three_temp	three_prime	1	1	1	0
AGTTCTTCAGTGGCAAGCTTTA	miRNA	ssc-miR-22-5p	mature	known	templated	pig	22	638	0	22	0	1	mature	mature	2	0	1	0
ATACAGTACTGTGATAACTGAA	miRNA	ssc-miR-101	mature	known	non-templated	pig	22	1373	1	21	0	0	five_non-temp	five_prime	11	0	0	0
ATACCCTGTAGATCCGAATTTGT	miRNA	ssc-miR-10a-5p	mature	known	templated	pig	23	1129	1	22	0	0	five_temp	five_prime	22	0	0	0
ATACTGCCTGGTAATGATGAC	miRNA	hsa-miR-200b-3p	mature	novel	templated	human	21	1442	-2	20	1	0	both_temp	both	5	0	1	0
ATACTGTAAACGCTTTCTGATG	miRNA	hsa-miR-3607-3p	mature	novel	templated	human	22	263	2	20	0	0	five_temp	five_prime	6	0	0	0
ATAGCTTATCAGACTGATGTTGAC	miRNA	ssc-miR-21	mature	known	non-templated	pig	24	455	1	22	1	0	both_non-temp	both	63	0	0	0
ATATAATACAACCTGCTAAGT	miRNA	ssc-miR-374b-5p	mature	known	templated	pig	21	569	0	21	1	0	three_temp	three_prime	4	0	1	0
ATATAATACAACCTGCTAAGTA	miRNA	ssc-miR-374b-5p	mature	known	non-templated	pig	22	939	0	21	1	0	three_non-temp	three_prime	3	0	1	0
ATATAATACAACCTGCTAAGTG	miRNA	ssc-miR-374b-5p	mature	known	templated	pig	22	14910	0	22	0	1	mature	mature	1	1	1	0
ATATATTAAATGGATTTTTGGAGCC	miRNA	bta-miR-1246	mature	novel	non-templated	cattle	25	435	8	16	3	0	both_non-temp	both	11	0	0	0
ATATATTAAATGGATTTTTGGAGCT	miRNA	bta-miR-1246	mature	novel	non-templated	cattle	25	1682	8	16	3	0	both_non-temp	both	4	0	1	0
ATATATTAAATGGATTTTTGGAGT	miRNA	bta-miR-1246	mature	novel	non-templated	cattle	24	740	8	15	4	0	both_non-temp	both	6	0	0	0
ATCAACAGACATTAATTGGGC	miRNA	ssc-miR-421-3p	mature	known	templated	pig	21	290	0	21	2	0	three_temp	three_prime	5	0	1	0
ATCAACAGACATTAATTGGGCG	miRNA	ssc-miR-421-3p	mature	known	templated	pig	22	639	0	22	1	0	three_temp	three_prime	4	0	1	0
ATCAACAGACATTAATTGGGCGC	miRNA	ssc-miR-421-3p	mature	known	templated	pig	23	3227	0	23	0	1	mature	mature	1	1	1	0
ATCAACAGACATTAATTGGGCGT	miRNA	ssc-miR-421-3p	mature	known	non-templated	pig	23	1059	0	22	1	0	three_non-temp	three_prime	2	0	1	0
ATCACATTGCCAGGGATT	miRNA	ssc-miR-23b	mature	known	templated	pig	18	444	0	18	4	0	three_temp	three_prime	6	0	0	0
ATCACATTGCCAGGGATTACC	miRNA	ssc-miR-23b	mature	known	templated	pig	21	1319	0	21	1	0	three_temp	three_prime	2	0	1	0
ATCACATTGCCAGGGATTACCA	miRNA	ssc-miR-23b	mature	known	templated	pig	22	543	0	22	0	1	mature	mature	4	0	1	0
ATCACATTGCCAGGGATTACCAC	miRNA	ssc-miR-23b	mature	known	templated	pig	23	649	0	22	1	0	three_temp	three_prime	3	0	1	0
ATCACATTGCCAGGGATTACCACC	miRNA	ssc-miR-23b	mature	known	non-templated	pig	24	486	0	22	2	0	three_non-temp	three_prime	5	0	1	0
ATCACATTGCCAGGGATTACT	miRNA	ssc-miR-23b	mature	known	non-templated	pig	21	361	0	20	2	0	three_non-temp	three_prime	7	0	0	0
ATCACATTGCCAGGGATTTC	miRNA	ssc-miR-23a	mature	known	templated	pig	20	412	0	20	1	0	three_temp	three_prime	3	0	1	0
ATCACATTGCCAGGGATTTCC	miRNA	ssc-miR-23a	mature	known	templated	pig	21	1368	0	21	0	1	mature	mature	1	1	1	0
ATCACATTGCCAGGGATTTCCA	miRNA	ssc-miR-23a	mature	known	templated	pig	22	593	0	21	1	0	three_temp	three_prime	2	0	1	0
ATCACATTGCCAGGGATTTCT	miRNA	ssc-miR-23a	mature	known	non-templated	pig	21	320	0	20	1	0	three_non-temp	three_prime	4	0	1	0
ATCACTAACCACACGGCCAG	miRNA	hsa-miR-34c-3p	mature	novel	templated	human	20	382	-1	20	-1	0	both_temp	both	4	0	1	0
ATCACTAACCACACGGCCAGA	miRNA	hsa-miR-34c-3p	mature	novel	non-templated	human	21	314	-1	20	1	0	both_non-temp	both	6	0	0	0
ATCACTAACCACACGGCCAGG	miRNA	hsa-miR-34c-3p	mature	novel	templated	human	21	3892	1	21	0	0	five_temp	five_prime	1	1	1	0
ATCACTAACCACACGGCCAGGT	miRNA	hsa-miR-34c-3p	mature	novel	templated	human	22	353	-1	21	1	0	both_temp	both	5	0	1	0
ATCAGACTGATGTTGAC	miRNA	ssc-miR-21	mature	known	templated	pig	17	14496	-6	16	1	0	both_temp	both	15	0	0	0
ATCAGACTGATGTTGACA	miRNA	bta-miR-21-5p	mature	novel	non-templated	cattle	18	1257	-6	17	1	0	both_non-temp	both	6	0	0	0
ATCAGACTGATGTTGACC	miRNA	bta-miR-21-5p	mature	novel	non-templated	cattle	18	465	-6	17	1	0	both_non-temp	both	12	0	0	0
ATCAGACTGATGTTGACT	miRNA	bta-miR-21-5p	mature	novel	templated	cattle	18	982	6	18	0	0	five_temp	five_prime	8	0	0	0
ATCAGACTGATGTTGAT	miRNA	ssc-miR-21	mature	known	non-templated	pig	17	1584	-6	16	1	0	both_non-temp	both	37	0	0	0
ATCCCACTTCTGACACC	miRNA	bta-miR-2478	mature	novel	templated	cattle	17	935	-2	17	-1	0	both_temp	both	3	0	1	0
ATCCCACTTCTGACACCA	miRNA	bta-miR-2478	mature	novel	templated	cattle	18	6080	2	18	0	0	five_temp	five_prime	1	1	1	0
ATCCCAGCGGTGCCTCCA	miRNA	hsa-miR-5100	mature	novel	non-templated	human	18	1215	-5	16	2	0	both_non-temp	both	2	0	1	0
ATCCCCGACTGGAAGCT	miRNA	ssc-miR-30d	mature	known	templated	pig	17	1385	7	17	0	0	five_temp	five_prime	23	0	0	0
ATCCTTGACTGGAAGCC	miRNA	ssc-miR-30e-5p	mature	known	non-templated	pig	17	342	-7	16	1	0	both_non-temp	both	23	0	0	0
ATCCTTGACTGGAAGCT	miRNA	ssc-miR-30e-5p	mature	known	templated	pig	17	1197	7	17	0	0	five_temp	five_prime	15	0	0	0
ATCGGGAATGTCGTGTCCGCCC	miRNA	ssc-miR-425-3p	mature	known	templated	pig	22	611	0	22	0	1	mature	mature	1	1	1	0
ATCTCGGAAGCTAAGCA	miRNA	hsa-miR-7641	mature	novel	templated	human	17	477	-3	16	1	0	both_temp	both	2	0	1	0
ATCTTACCGGACAGTGCTGG	miRNA	hsa-miR-200a-5p	mature	novel	templated	human	20	853	-1	20	-1	0	both_temp	both	8	0	0	0
ATCTTACCGGACAGTGCTGGA	miRNA	hsa-miR-200a-5p	mature	novel	templated	human	21	9932	1	21	0	0	five_temp	five_prime	2	0	1	0
ATCTTACCGGACAGTGCTGGAA	miRNA	hsa-miR-200a-5p	mature	novel	non-templated	human	22	897	-1	21	1	0	both_non-temp	both	7	0	0	0
ATCTTACCGGACAGTGCTGGAT	miRNA	hsa-miR-200a-5p	mature	novel	templated	human	22	1054	-1	21	1	0	both_temp	both	5	0	1	0
ATCTTACTGGGCAGCATTGG	miRNA	hsa-miR-200b-5p	mature	novel	templated	human	20	1111	-1	20	-1	0	both_temp	both	4	0	1	0
ATCTTACTGGGCAGCATTGGA	miRNA	hsa-miR-200b-5p	mature	novel	templated	human	21	5182	1	21	0	0	five_temp	five_prime	2	0	1	0
ATGACACGATCACTCCCGTTGAG	miRNA	ssc-miR-425-5p	mature	known	templated	pig	23	586	-1	22	1	0	both_temp	both	6	0	0	0
ATGACACGATCACTCCCGTTGAGT	miRNA	bta-miR-425-5p	mature	novel	templated	cattle	24	1508	0	22	2	0	three_temp	three_prime	1	1	1	0
ATGCACCTGGGCAAGGATTCTG	miRNA	ssc-miR-500	mature	known	templated	pig	22	618	0	21	1	0	three_temp	three_prime	2	0	1	0
ATGCACCTGGGCAAGGATTCTGA	miRNA	ssc-miR-500	mature	known	templated	pig	23	825	0	21	2	0	three_temp	three_prime	1	1	1	0
ATGCCTTGAGTGTAGGACCG	miRNA	ssc-miR-532-5p	mature	known	templated	pig	20	1109	-1	20	-1	0	both_temp	both	8	0	0	0
ATGCCTTGAGTGTAGGACCGC	miRNA	ssc-miR-532-5p	mature	known	non-templated	pig	21	3229	-1	20	1	0	both_non-temp	both	5	0	1	0
ATGCCTTGAGTGTAGGACCGT	miRNA	ssc-miR-532-5p	mature	known	templated	pig	21	13725	1	21	0	0	five_temp	five_prime	3	0	1	0
ATGCGGAACCTGCGGATAC	miRNA	ssc-miR-7134-3p	mature	known	templated	pig	19	687	0	19	2	0	three_temp	three_prime	10	0	0	0
ATGCGGAACCTGCGGATACG	miRNA	ssc-miR-7134-3p	mature	known	templated	pig	20	2631	0	20	1	0	three_temp	three_prime	4	0	1	0
ATGCGGAACCTGCGGATACGA	miRNA	ssc-miR-7134-3p	mature	known	non-templated	pig	21	1651	0	20	1	0	three_non-temp	three_prime	6	0	0	0
ATGCGGAACCTGCGGATACGC	miRNA	ssc-miR-7134-3p	mature	known	non-templated	pig	21	545	0	20	1	0	three_non-temp	three_prime	11	0	0	0
ATGCGGAACCTGCGGATACGG	miRNA	ssc-miR-7134-3p	mature	known	templated	pig	21	23322	0	21	0	1	mature	mature	1	1	1	0
ATGCGGAACCTGCGGATACGGA	miRNA	ssc-miR-7134-3p	mature	known	non-templated	pig	22	4998	0	21	1	0	three_non-temp	three_prime	2	0	1	0
ATGCGGAACCTGCGGATACGGT	miRNA	ssc-miR-7134-3p	mature	known	non-templated	pig	22	950	0	21	1	0	three_non-temp	three_prime	8	0	0	0
ATGCGGAACCTGCGGATACGT	miRNA	ssc-miR-7134-3p	mature	known	non-templated	pig	21	960	0	20	1	0	three_non-temp	three_prime	7	0	0	0
ATGGCACTGGTAGAATTCAC	miRNA	ssc-miR-183	mature	known	templated	pig	20	806	-1	20	-2	0	both_temp	both	14	0	0	0
ATGGCACTGGTAGAATTCACA	miRNA	ssc-miR-183	mature	known	non-templated	pig	21	456	-1	20	-2	0	both_non-temp	both	18	0	0	0
ATGGCACTGGTAGAATTCACC	miRNA	ssc-miR-183	mature	known	non-templated	pig	21	3784	-1	20	-2	0	both_non-temp	both	7	0	0	0
ATGGCACTGGTAGAATTCACG	miRNA	ssc-miR-183	mature	known	non-templated	pig	21	526	-1	20	-2	0	both_non-temp	both	17	0	0	0
ATGGCACTGGTAGAATTCACT	miRNA	ssc-miR-183	mature	known	templated	pig	21	17703	-1	21	-1	0	both_temp	both	4	0	1	0
ATGGCACTGGTAGAATTCACTA	miRNA	ssc-miR-183	mature	known	non-templated	pig	22	1675	-1	21	1	0	both_non-temp	both	8	0	0	0
ATGGCACTGGTAGAATTCACTG	miRNA	ssc-miR-183	mature	known	templated	pig	22	28047	1	22	0	0	five_temp	five_prime	2	0	1	0
ATGGCACTGGTAGAATTCACTGT	miRNA	ssc-miR-183	mature	known	templated	pig	23	570	-1	22	1	0	both_temp	both	15	0	0	0
ATGGCACTGGTAGAATTCACTT	miRNA	ssc-miR-183	mature	known	non-templated	pig	22	435	-1	21	1	0	both_non-temp	both	19	0	0	0
ATGGCCCTGACTGAAGACCTGCAGTC	miRNA	bta-miR-1291	mature	novel	non-templated	cattle	26	646	1	24	1	0	both_non-temp	both	4	0	1	0
ATGGCCCTGACTGAAGACCTGCAGTT	miRNA	bta-miR-1291	mature	novel	non-templated	cattle	26	2976	1	24	1	0	both_non-temp	both	2	0	1	0
ATGTCCGCGGGTTCCCTATC	miRNA	ssc-miR-7134-5p	mature	known	templated	pig	20	1190	0	20	1	0	three_temp	three_prime	4	0	1	0
ATGTCCGCGGGTTCCCTATCC	miRNA	ssc-miR-7134-5p	mature	known	templated	pig	21	5346	0	21	0	1	mature	mature	1	1	1	0
ATGTCCGCGGGTTCCCTATCCC	miRNA	ssc-miR-7134-5p	mature	known	templated	pig	22	1589	0	21	1	0	three_temp	three_prime	2	0	1	0
ATGTCCGCGGGTTCCCTATCCT	miRNA	ssc-miR-7134-5p	mature	known	non-templated	pig	22	620	0	21	1	0	three_non-temp	three_prime	6	0	0	0
ATGTCCGCGGGTTCCCTATCT	miRNA	ssc-miR-7134-5p	mature	known	non-templated	pig	21	1521	0	20	1	0	three_non-temp	three_prime	3	0	1	0
ATGTGCCTTTGGACTACATCGT	miRNA	ssc-miR-455-5p	mature	known	templated	pig	22	774	-1	21	1	0	both_temp	both	5	0	1	0
ATTGCACATTACTAAGTTGCA	miRNA	ssc-miR-32	mature	known	templated	pig	21	1278	-1	20	1	0	both_temp	both	2	0	1	0
ATTGCACGGTATCCATCTGTA	miRNA	ssc-miR-363	mature	known	templated	pig	21	453	-1	21	-1	0	both_temp	both	2	0	1	0
ATTGCACTCGTCCCGGCCT	miRNA	ssc-miR-92b-3p	mature	known	templated	pig	19	302	-1	19	-2	0	both_temp	both	23	0	0	0
ATTGCACTCGTCCCGGCCTC	miRNA	ssc-miR-92b-3p	mature	known	templated	pig	20	488	-1	20	-1	0	both_temp	both	15	0	0	0
ATTGCACTCGTCCCGGCCTCA	miRNA	ssc-miR-92b-3p	mature	known	non-templated	pig	21	441	-1	20	1	0	both_non-temp	both	18	0	0	0
ATTGCACTCGTCCCGGCCTCC	miRNA	ssc-miR-92b-3p	mature	known	templated	pig	21	2607	1	21	0	0	five_temp	five_prime	4	0	1	0
ATTGCACTCGTCCCGGCCTCCT	miRNA	ssc-miR-92b-3p	mature	known	non-templated	pig	22	346	-1	21	1	0	both_non-temp	both	21	0	0	0
ATTGCACTCGTCCCGGCCTCT	miRNA	ssc-miR-92b-3p	mature	known	non-templated	pig	21	1429	-1	20	1	0	both_non-temp	both	8	0	0	0
ATTGCACTTGTCCCGGCCTG	miRNA	ssc-miR-92a	mature	known	templated	pig	20	3322	-1	20	-1	0	both_temp	both	13	0	0	0
ATTGCACTTGTCCCGGCCTGA	miRNA	ssc-miR-92a	mature	known	non-templated	pig	21	3105	-1	20	1	0	both_non-temp	both	14	0	0	0
ATTGCACTTGTCCCGGCCTGC	miRNA	ssc-miR-92a	mature	known	non-templated	pig	21	23344	-1	20	1	0	both_non-temp	both	5	0	1	0
ATTGCACTTGTCCCGGCCTGG	miRNA	ssc-miR-92a	mature	known	non-templated	pig	21	2476	-1	20	1	0	both_non-temp	both	17	0	0	0
ATTGCACTTGTCCCGGCCTGT	miRNA	ssc-miR-92a	mature	known	templated	pig	21	97074	1	21	0	0	five_temp	five_prime	3	0	1	0
ATTGCACTTGTCCCGGCCTGTA	miRNA	ssc-miR-92a	mature	known	non-templated	pig	22	11778	-1	21	1	0	both_non-temp	both	8	0	0	0
ATTGCACTTGTCCCGGCCTGTG	miRNA	ssc-miR-92a	mature	known	templated	pig	22	397	-1	21	1	0	both_temp	both	39	0	0	0
ATTGCACTTGTCCCGGCCTGTT	miRNA	ssc-miR-92a	mature	known	templated	pig	22	1109	-1	21	1	0	both_temp	both	27	0	0	0
ATTGCACTTGTCTCGGTCTG	miRNA	bta-miR-25	mature	novel	templated	cattle	20	1166	-1	20	-1	0	both_temp	both	8	0	0	0
ATTGCACTTGTCTCGGTCTGA	miRNA	bta-miR-25	mature	novel	templated	cattle	21	4046	1	21	0	0	five_temp	five_prime	3	0	1	0
ATTGCACTTGTCTCGGTCTGAA	miRNA	bta-miR-25	mature	novel	non-templated	cattle	22	414	-1	21	1	0	both_non-temp	both	16	0	0	0
ATTGCACTTGTCTCGGTCTGT	miRNA	bta-miR-25	mature	novel	non-templated	cattle	21	425	-1	20	1	0	both_non-temp	both	15	0	0	0
ATTGCACTTTAGCAATGGTG	miRNA	bta-miR-367	mature	novel	templated	cattle	20	460	-2	20	-1	0	both_temp	both	3	0	1	0
ATTGCACTTTAGCAATGGTGA	miRNA	bta-miR-367	mature	novel	templated	cattle	21	608	2	21	0	0	five_temp	five_prime	2	0	1	0
ATTGTTCTCCAACCTGGCTCC	miRNA	ssc-miR-7857-3p	mature	known	non-templated	pig	21	602	0	20	2	0	three_non-temp	three_prime	13	0	0	0
ATTGTTCTCCAACCTGGCTCT	miRNA	ssc-miR-7857-3p	mature	known	templated	pig	21	2724	0	21	1	0	three_temp	three_prime	3	0	1	0
ATTGTTCTCCAACCTGGCTCTA	miRNA	ssc-miR-7857-3p	mature	known	non-templated	pig	22	597	0	21	1	0	three_non-temp	three_prime	14	0	0	0
ATTGTTCTCCAACCTGGCTCTC	miRNA	ssc-miR-7857-3p	mature	known	non-templated	pig	22	2351	0	21	1	0	three_non-temp	three_prime	4	0	1	0
ATTGTTCTCCAACCTGGCTCTT	miRNA	ssc-miR-7857-3p	mature	known	templated	pig	22	12794	0	22	0	1	mature	mature	1	1	1	0
ATTGTTCTCCAACCTGGCTCTTA	miRNA	ssc-miR-7857-3p	mature	known	non-templated	pig	23	1283	0	22	1	0	three_non-temp	three_prime	10	0	0	0
ATTGTTCTCCAACCTGGCTCTTC	miRNA	ssc-miR-7857-3p	mature	known	non-templated	pig	23	1877	0	22	1	0	three_non-temp	three_prime	8	0	0	0
ATTGTTCTCCAACCTGGCTCTTT	miRNA	ssc-miR-7857-3p	mature	known	templated	pig	23	10996	0	22	1	0	three_temp	three_prime	2	0	1	0
ATTGTTCTCCAACCTGGCTCTTTA	miRNA	ssc-miR-7857-3p	mature	known	templated	pig	24	1655	0	22	2	0	three_temp	three_prime	9	0	0	0
ATTGTTCTCCAACCTGGCTCTTTT	miRNA	ssc-miR-7857-3p	mature	known	non-templated	pig	24	501	0	22	2	0	three_non-temp	three_prime	16	0	0	0
CAAAACGTGAGGCGCTGCTA	miRNA	ssc-miR-424-3p	mature	known	templated	pig	20	876	0	20	1	0	three_temp	three_prime	6	0	0	0
CAAAACGTGAGGCGCTGCTAC	miRNA	ssc-miR-424-3p	mature	known	non-templated	pig	21	1272	0	20	1	0	three_non-temp	three_prime	4	0	1	0
CAAAACGTGAGGCGCTGCTAT	miRNA	ssc-miR-424-3p	mature	known	templated	pig	21	6751	0	21	0	1	mature	mature	1	1	1	0
CAAAACGTGAGGCGCTGCTATA	miRNA	ssc-miR-424-3p	mature	known	templated	pig	22	5413	0	21	1	0	three_temp	three_prime	2	0	1	0
CAAAACGTGAGGCGCTGCTATAA	miRNA	ssc-miR-424-3p	mature	known	non-templated	pig	23	411	0	21	2	0	three_non-temp	three_prime	7	0	0	0
CAAACTGTGGGGGCACTT	miRNA	ssc-miR-371-5p	mature	known	templated	pig	18	583	-3	18	-1	0	both_temp	both	111	0	0	0
CAAACTGTGGGGGCACTTC	miRNA	ssc-miR-371-5p	mature	known	templated	pig	19	420	-3	18	1	0	both_temp	both	131	0	0	0
CAAACTGTGGGGGCACTTT	miRNA	ssc-miR-371-5p	mature	known	templated	pig	19	2479	3	19	0	0	five_temp	five_prime	61	0	0	0
CAAACTGTGGGGGCACTTTC	miRNA	ssc-miR-371-5p	mature	known	templated	pig	20	924	-3	19	1	0	both_temp	both	95	0	0	0
CAAACTGTGGGGGCACTTTG	miRNA	ssc-miR-371-5p	mature	known	non-templated	pig	20	1374	-3	19	1	0	both_non-temp	both	81	0	0	0
CAAAGAATTCTCCTTTTGGG	miRNA	ssc-miR-186	mature	known	templated	pig	20	1511	0	20	3	0	three_temp	three_prime	6	0	0	0
CAAAGAATTCTCCTTTTGGGC	miRNA	ssc-miR-186	mature	known	templated	pig	21	2791	0	21	2	0	three_temp	three_prime	3	0	1	0
CAAAGAATTCTCCTTTTGGGCA	miRNA	ssc-miR-186	mature	known	non-templated	pig	22	645	0	21	2	0	three_non-temp	three_prime	10	0	0	0
CAAAGAATTCTCCTTTTGGGCC	miRNA	ssc-miR-186	mature	known	non-templated	pig	22	2040	0	21	2	0	three_non-temp	three_prime	4	0	1	0
CAAAGAATTCTCCTTTTGGGCT	miRNA	ssc-miR-186	mature	known	templated	pig	22	8944	0	22	1	0	three_temp	three_prime	1	1	1	0
CAAAGAATTCTCCTTTTGGGCTC	miRNA	ssc-miR-186	mature	known	non-templated	pig	23	1068	0	22	1	0	three_non-temp	three_prime	8	0	0	0
CAAAGAATTCTCCTTTTGGGCTT	miRNA	ssc-miR-186	mature	known	templated	pig	23	5541	0	23	0	1	mature	mature	2	0	1	0
CAAAGAATTCTCCTTTTGGGT	miRNA	ssc-miR-186	mature	known	non-templated	pig	21	672	0	20	3	0	three_non-temp	three_prime	9	0	0	0
CAAAGCACACGGCCTGCAGAGA	miRNA	bta-miR-330	mature	novel	templated	cattle	22	1058	1	22	0	0	five_temp	five_prime	3	0	1	0
CAAAGCACACGGCCTGCAGAGAG	miRNA	bta-miR-330	mature	novel	templated	cattle	23	819	-1	22	1	0	both_temp	both	5	0	1	0
CAAAGTGCTCACAGTGCAGGTAG	miRNA	ssc-miR-20b	mature	known	templated	pig	23	320	0	23	0	1	mature	mature	1	1	1	0
CAAAGTGCTGTTCGTGCAGGT	miRNA	bta-miR-93	mature	novel	templated	cattle	21	1406	0	21	1	0	three_temp	three_prime	3	0	1	0
CAAAGTGCTGTTCGTGCAGGTAA	miRNA	bta-miR-93	mature	novel	non-templated	cattle	23	1350	0	22	1	0	three_non-temp	three_prime	4	0	1	0
CAAAGTGCTGTTCGTGCAGGTAG	miRNA	bta-miR-93	mature	novel	templated	cattle	23	27237	0	22	1	0	three_temp	three_prime	1	1	1	0
CAAAGTGCTGTTCGTGCAGGTAGA	miRNA	bta-miR-93	mature	novel	non-templated	cattle	24	3008	0	22	2	0	three_non-temp	three_prime	2	0	1	0
CAAAGTGCTGTTCGTGCAGGTAGT	miRNA	bta-miR-93	mature	novel	templated	cattle	24	564	0	22	2	0	three_temp	three_prime	5	0	1	0
CAAAGTGCTTACAGTGCAGGC	miRNA	ssc-miR-17-5p	mature	known	non-templated	pig	21	354	0	20	3	0	three_non-temp	three_prime	9	0	0	0
CAAAGTGCTTACAGTGCAGGT	miRNA	ssc-miR-17-5p	mature	known	templated	pig	21	1686	0	21	2	0	three_temp	three_prime	4	0	1	0
CAAAGTGCTTACAGTGCAGGTA	miRNA	ssc-miR-17-5p	mature	known	templated	pig	22	1204	0	22	1	0	three_temp	three_prime	6	0	0	0
CAAAGTGCTTACAGTGCAGGTAA	miRNA	ssc-miR-17-5p	mature	known	non-templated	pig	23	2284	0	22	1	0	three_non-temp	three_prime	3	0	1	0
CAAAGTGCTTACAGTGCAGGTAG	miRNA	ssc-miR-17-5p	mature	known	templated	pig	23	43459	0	23	0	1	mature	mature	1	1	1	0
CAAAGTGCTTACAGTGCAGGTAGA	miRNA	ssc-miR-17-5p	mature	known	non-templated	pig	24	20905	0	23	1	0	three_non-temp	three_prime	2	0	1	0
CAAAGTGCTTACAGTGCAGGTAGAA	miRNA	ssc-miR-17-5p	mature	known	non-templated	pig	25	341	0	23	2	0	three_non-temp	three_prime	10	0	0	0
CAAAGTGCTTACAGTGCAGGTAGG	miRNA	ssc-miR-17-5p	mature	known	non-templated	pig	24	403	0	23	1	0	three_non-temp	three_prime	8	0	0	0
CAAAGTGCTTACAGTGCAGGTAGT	miRNA	ssc-miR-17-5p	mature	known	templated	pig	24	917	0	23	1	0	three_temp	three_prime	7	0	0	0
CAAATTCGTATCTAGGGGAAT	miRNA	ssc-miR-10a-3p	mature	known	templated	pig	21	1483	0	21	0	1	mature	mature	1	1	1	0
CAACCCGTAGATCCGATCTTGT	miRNA	ssc-miR-99a	mature	known	non-templated	pig	22	370	1	21	1	0	both_non-temp	both	24	0	0	0
CAACGGAATCCCAAAAGC	miRNA	ssc-miR-191	mature	known	templated	pig	18	2123	0	18	5	0	three_temp	three_prime	12	0	0	0
CAACGGAATCCCAAAAGCAG	miRNA	ssc-miR-191	mature	known	templated	pig	20	497	0	20	3	0	three_temp	three_prime	24	0	0	0
CAACGGAATCCCAAAAGCAGC	miRNA	ssc-miR-191	mature	known	templated	pig	21	4028	0	21	2	0	three_temp	three_prime	7	0	0	0
CAACGGAATCCCAAAAGCAGCA	miRNA	ssc-miR-191	mature	known	non-templated	pig	22	1768	0	21	2	0	three_non-temp	three_prime	15	0	0	0
CAACGGAATCCCAAAAGCAGCC	miRNA	ssc-miR-191	mature	known	non-templated	pig	22	8477	0	21	2	0	three_non-temp	three_prime	5	0	1	0
CAACGGAATCCCAAAAGCAGCG	miRNA	ssc-miR-191	mature	known	non-templated	pig	22	1057	0	21	2	0	three_non-temp	three_prime	17	0	0	0
CAACGGAATCCCAAAAGCAGCT	miRNA	ssc-miR-191	mature	known	templated	pig	22	35363	0	22	1	0	three_temp	three_prime	3	0	1	0
CAACGGAATCCCAAAAGCAGCTA	miRNA	ssc-miR-191	mature	known	non-templated	pig	23	9723	0	22	1	0	three_non-temp	three_prime	4	0	1	0
CAACGGAATCCCAAAAGCAGCTC	miRNA	ssc-miR-191	mature	known	non-templated	pig	23	1109	0	22	1	0	three_non-temp	three_prime	16	0	0	0
CAACGGAATCCCAAAAGCAGCTG	miRNA	ssc-miR-191	mature	known	templated	pig	23	175243	0	23	0	1	mature	mature	1	1	1	0
CAACGGAATCCCAAAAGCAGCTGA	miRNA	ssc-miR-191	mature	known	non-templated	pig	24	2651	0	23	1	0	three_non-temp	three_prime	10	0	0	0
CAACGGAATCCCAAAAGCAGCTGC	miRNA	ssc-miR-191	mature	known	non-templated	pig	24	707	0	23	1	0	three_non-temp	three_prime	21	0	0	0
CAACGGAATCCCAAAAGCAGCTGG	miRNA	ssc-miR-191	mature	known	non-templated	pig	24	495	0	23	1	0	three_non-temp	three_prime	25	0	0	0
CAACGGAATCCCAAAAGCAGCTGT	miRNA	ssc-miR-191	mature	known	templated	pig	24	3102	0	23	1	0	three_temp	three_prime	8	0	0	0
CAACGGAATCCCAAAAGCAGCTT	miRNA	ssc-miR-191	mature	known	non-templated	pig	23	2716	0	22	1	0	three_non-temp	three_prime	9	0	0	0
CAACGGAATCCCAAAAGCAGT	miRNA	ssc-miR-191	mature	known	non-templated	pig	21	788	0	20	3	0	three_non-temp	three_prime	20	0	0	0
CAAGCTCGTGTCTGTGGGTCCG	miRNA	hsa-miR-99b-3p	mature	novel	templated	human	22	810	0	22	0	1	mature	mature	1	1	1	0
CAAGTGCTTCCATGTTTTAGA	miRNA	bta-miR-302a	mature	novel	non-templated	cattle	21	487	1	19	3	0	both_non-temp	both	37	0	0	0
CAAGTGCTTCCATGTTTTAGC	miRNA	bta-miR-302a	mature	novel	non-templated	cattle	21	7967	1	19	3	0	both_non-temp	both	8	0	0	0
CAAGTGCTTCCATGTTTTAGG	miRNA	bta-miR-302a	mature	novel	non-templated	cattle	21	770	1	19	3	0	both_non-temp	both	33	0	0	0
CAAGTGCTTCCATGTTTTAGTA	miRNA	bta-miR-302a	mature	novel	non-templated	cattle	22	2791	1	20	2	0	both_non-temp	both	19	0	0	0
CAAGTGCTTCCATGTTTTAGTG	miRNA	bta-miR-302a	mature	novel	non-templated	cattle	22	4001	1	21	1	0	both_non-temp	both	16	0	0	0
CAAGTGCTTCCATGTTTTAGTGA	miRNA	bta-miR-302a	mature	novel	non-templated	cattle	23	17536	1	22	0	0	five_non-temp	five_prime	3	0	1	0
CAAGTGCTTCCATGTTTTAGTGAA	miRNA	bta-miR-302a	mature	novel	non-templated	cattle	24	473	1	22	1	0	both_non-temp	both	39	0	0	0
CAAGTGCTTCCATGTTTTAGTGC	miRNA	bta-miR-302a	mature	novel	non-templated	cattle	23	1705	1	21	1	0	both_non-temp	both	24	0	0	0
CAAGTGCTTCCATGTTTTAGTGG	miRNA	bta-miR-302a	mature	novel	non-templated	cattle	23	941	1	21	1	0	both_non-temp	both	31	0	0	0
CAAGTGCTTCCATGTTTTAGTGT	miRNA	bta-miR-302a	mature	novel	non-templated	cattle	23	6183	1	21	1	0	both_non-temp	both	10	0	0	0
CAATGGATTTTTGGAGCT	miRNA	bta-miR-1246	mature	novel	non-templated	cattle	18	605	1	16	3	0	both_non-temp	both	8	0	0	0
CAATTTAGTGTGTGTGATATT	miRNA	hsa-miR-32-3p	mature	novel	templated	human	21	667	0	21	1	0	three_temp	three_prime	1	1	1	0
CACAGTGAACCGGTCTCTT	miRNA	ssc-miR-128	mature	known	templated	pig	19	1650	-1	19	-1	0	both_temp	both	23	0	0	0
CACAGTGAACCGGTCTCTTA	miRNA	ssc-miR-128	mature	known	non-templated	pig	20	979	-1	19	1	0	both_non-temp	both	29	0	0	0
CACAGTGAACCGGTCTCTTC	miRNA	ssc-miR-128	mature	known	non-templated	pig	20	8557	-1	19	1	0	both_non-temp	both	10	0	0	0
CACAGTGAACCGGTCTCTTG	miRNA	ssc-miR-128	mature	known	non-templated	pig	20	420	-1	19	1	0	both_non-temp	both	37	0	0	0
CACAGTGAACCGGTCTCTTT	miRNA	ssc-miR-128	mature	known	templated	pig	20	49655	1	20	0	0	five_temp	five_prime	4	0	1	0
CACAGTGAACCGGTCTCTTTA	miRNA	ssc-miR-128	mature	known	non-templated	pig	21	7433	-1	20	1	0	both_non-temp	both	14	0	0	0
CACAGTGAACCGGTCTCTTTC	miRNA	ssc-miR-128	mature	known	templated	pig	21	18279	-1	20	1	0	both_temp	both	7	0	0	0
CACAGTGAACCGGTCTCTTTG	miRNA	ssc-miR-128	mature	known	non-templated	pig	21	371	-1	20	1	0	both_non-temp	both	38	0	0	0
CACAGTGAACCGGTCTCTTTT	miRNA	ssc-miR-128	mature	known	templated	pig	21	9872	-1	20	1	0	both_temp	both	9	0	0	0
CACCCGTAGAACCGACCTTG	miRNA	ssc-miR-99b	mature	known	templated	pig	20	958	0	20	2	0	three_temp	three_prime	6	0	0	0
CACCCGTAGAACCGACCTTGC	miRNA	ssc-miR-99b	mature	known	templated	pig	21	4228	0	21	1	0	three_temp	three_prime	3	0	1	0
CACCCGTAGAACCGACCTTGCA	miRNA	ssc-miR-99b	mature	known	non-templated	pig	22	2927	0	21	1	0	three_non-temp	three_prime	4	0	1	0
CACCCGTAGAACCGACCTTGCC	miRNA	ssc-miR-99b	mature	known	non-templated	pig	22	707	0	21	1	0	three_non-temp	three_prime	8	0	0	0
CACCCGTAGAACCGACCTTGCG	miRNA	ssc-miR-99b	mature	known	templated	pig	22	29474	0	22	0	1	mature	mature	1	1	1	0
CACCCGTAGAACCGACCTTGCGA	miRNA	ssc-miR-99b	mature	known	non-templated	pig	23	629	0	22	1	0	three_non-temp	three_prime	10	0	0	0
CACCCGTAGAACCGACCTTGCGT	miRNA	ssc-miR-99b	mature	known	non-templated	pig	23	701	0	22	1	0	three_non-temp	three_prime	9	0	0	0
CACCCGTAGAACCGACCTTGCT	miRNA	ssc-miR-99b	mature	known	non-templated	pig	22	536	0	21	1	0	three_non-temp	three_prime	12	0	0	0
CACCCGTAGAACCGACCTTGT	miRNA	ssc-miR-99b	mature	known	non-templated	pig	21	1040	0	20	2	0	three_non-temp	three_prime	5	0	1	0
CACCTCCCCTGCAAACGTCCA	miRNA	ssc-miR-1306-5p	mature	known	templated	pig	21	432	1	21	0	0	five_temp	five_prime	3	0	1	0
CACTAGATTGTGAGCTCCTG	miRNA	ssc-miR-28-3p	mature	known	templated	pig	20	701	0	20	2	0	three_temp	three_prime	8	0	0	0
CACTAGATTGTGAGCTCCTGG	miRNA	ssc-miR-28-3p	mature	known	templated	pig	21	3350	0	21	1	0	three_temp	three_prime	2	0	1	0
CACTAGATTGTGAGCTCCTGGA	miRNA	ssc-miR-28-3p	mature	known	templated	pig	22	10842	0	22	0	1	mature	mature	1	1	1	0
CACTAGATTGTGAGCTCCTGGAA	miRNA	ssc-miR-28-3p	mature	known	non-templated	pig	23	2252	0	22	1	0	three_non-temp	three_prime	3	0	1	0
CACTAGATTGTGAGCTCCTGGAAA	miRNA	ssc-miR-28-3p	mature	known	non-templated	pig	24	1425	0	22	2	0	three_non-temp	three_prime	6	0	0	0
CACTCAAACTGTGGGGGCACTT	miRNA	ssc-miR-371-5p	mature	known	templated	pig	22	535	1	21	1	0	both_temp	both	117	0	0	0
CACTCAAACTGTGGGGGCACTTT	miRNA	ssc-miR-371-5p	mature	known	templated	pig	23	1875	1	22	0	0	five_temp	five_prime	72	0	0	0
CACTCAAACTGTGGGGGCACTTTC	miRNA	ssc-miR-371-5p	mature	known	templated	pig	24	626	1	22	1	0	both_temp	both	108	0	0	0
CACTGGACTTGGAGTCAGAAGG	miRNA	ssc-miR-378	mature	known	templated	pig	22	557	1	21	1	0	both_temp	both	31	0	0	0
CACTGGACTTGGAGTCAGAAGGC	miRNA	ssc-miR-378	mature	known	templated	pig	23	4426	1	22	0	0	five_temp	five_prime	17	0	0	0
CACTGGACTTGGAGTCAGAAGGT	miRNA	ssc-miR-378	mature	known	non-templated	pig	23	989	1	21	1	0	both_non-temp	both	28	0	0	0
CACTTGTCCCGGCCTGT	miRNA	ssc-miR-92a	mature	known	templated	pig	17	776	5	17	0	0	five_temp	five_prime	31	0	0	0
CAGCAGCAATTCATGTTTTGA	miRNA	ssc-miR-424-5p	mature	known	templated	pig	21	727	0	21	1	0	three_temp	three_prime	2	0	1	0
CAGCAGCAATTCATGTTTTGAA	miRNA	ssc-miR-424-5p	mature	known	templated	pig	22	2300	0	22	0	1	mature	mature	1	1	1	0
CAGCAGCAATTCATGTTTTGAAA	miRNA	ssc-miR-424-5p	mature	known	non-templated	pig	23	415	0	22	1	0	three_non-temp	three_prime	3	0	1	0
CAGCAGCAATTCATGTTTTGAAC	miRNA	ssc-miR-424-5p	mature	known	non-templated	pig	23	338	0	22	1	0	three_non-temp	three_prime	5	0	1	0
CAGCATTGTACAGGGCTATGA	miRNA	ssc-miR-103	mature	known	templated	pig	21	386	2	21	0	0	five_temp	five_prime	9	0	0	0
CAGCTCGGTCTGAGGCCCCTCAGC	miRNA	ssc-miR-423-3p	mature	known	non-templated	pig	24	438	1	22	1	0	both_non-temp	both	39	0	0	0
CAGCTCGGTCTGAGGCCCCTCAGT	miRNA	ssc-miR-423-3p	mature	known	non-templated	pig	24	2076	1	23	0	0	five_non-temp	five_prime	18	0	0	0
CAGGCTCAGTCCCCTCCCGAT	miRNA	bta-miR-484	mature	novel	templated	cattle	21	1701	1	21	0	0	five_temp	five_prime	4	0	1	0
CAGTGCAATGTTAAAAGGGCA	miRNA	ssc-miR-130a	mature	known	templated	pig	21	740	0	21	1	0	three_temp	three_prime	1	1	1	0
CAGTGCAATGTTAAAAGGGCATA	miRNA	ssc-miR-130a	mature	known	non-templated	pig	23	687	0	22	1	0	three_non-temp	three_prime	2	0	1	0
CAGTGCACTACAGAACTTTGA	miRNA	ssc-miR-148a-3p	mature	known	non-templated	pig	21	1210	-1	20	1	0	both_non-temp	both	10	0	0	0
CAGTGCACTACAGAACTTTGC	miRNA	ssc-miR-148a-3p	mature	known	non-templated	pig	21	11957	-1	20	1	0	both_non-temp	both	4	0	1	0
CAGTGCACTACAGAACTTTGG	miRNA	ssc-miR-148a-3p	mature	known	non-templated	pig	21	1227	-1	20	1	0	both_non-temp	both	9	0	0	0
CAGTGCACTACAGAACTTTGT	miRNA	ssc-miR-148a-3p	mature	known	templated	pig	21	54756	1	21	0	0	five_temp	five_prime	3	0	1	0
CAGTGCACTACAGAACTTTGTA	miRNA	ssc-miR-148a-3p	mature	known	non-templated	pig	22	997	-1	21	1	0	both_non-temp	both	13	0	0	0
CAGTGCATCACAGAACTTTGC	miRNA	ssc-miR-148b-3p	mature	known	non-templated	pig	21	502	-1	20	1	0	both_non-temp	both	11	0	0	0
CAGTGCATCACAGAACTTTGT	miRNA	ssc-miR-148b-3p	mature	known	templated	pig	21	2461	1	21	0	0	five_temp	five_prime	5	0	1	0
CAGTGCATCACAGAACTTTGTA	miRNA	ssc-miR-148b-3p	mature	known	non-templated	pig	22	789	-1	21	1	0	both_non-temp	both	9	0	0	0
CAGTGCATCACAGAACTTTGTT	miRNA	ssc-miR-148b-3p	mature	known	non-templated	pig	22	956	-1	21	1	0	both_non-temp	both	8	0	0	0
CAGTGCATGACAGAACTTGG	miRNA	ssc-miR-152	mature	known	templated	pig	20	483	1	20	0	0	five_temp	five_prime	6	0	0	0
CAGTGCATGACAGAACTTGGT	miRNA	ssc-miR-152	mature	known	non-templated	pig	21	815	-1	20	1	0	both_non-temp	both	5	0	1	0
CAGTGGTTTTACCCTATGGT	miRNA	hsa-miR-140-5p	mature	novel	templated	human	20	419	0	20	2	0	three_temp	three_prime	1	1	1	0
CAGTGGTTTTACCCTATGGTAA	miRNA	ssc-miR-140-5p	mature	known	non-templated	pig	22	427	1	20	1	0	both_non-temp	both	5	0	1	0
CAGTGGTTTTACCCTATGGTAG	miRNA	ssc-miR-140-5p	mature	known	templated	pig	22	6797	1	21	0	0	five_temp	five_prime	1	1	1	0
CATCTTACCGGACAGTGCT	miRNA	hsa-miR-200a-5p	mature	novel	templated	human	19	487	0	19	3	0	three_temp	three_prime	12	0	0	0
CATCTTACCGGACAGTGCTG	miRNA	hsa-miR-200a-5p	mature	novel	templated	human	20	536	0	20	2	0	three_temp	three_prime	11	0	0	0
CATCTTACCGGACAGTGCTGG	miRNA	hsa-miR-200a-5p	mature	novel	templated	human	21	4303	0	21	1	0	three_temp	three_prime	3	0	1	0
CATCTTACCGGACAGTGCTGGA	miRNA	hsa-miR-200a-5p	mature	novel	templated	human	22	44111	0	22	0	1	mature	mature	1	1	1	0
CATCTTACCGGACAGTGCTGGAA	miRNA	hsa-miR-200a-5p	mature	novel	non-templated	human	23	3889	0	22	1	0	three_non-temp	three_prime	4	0	1	0
CATCTTACCGGACAGTGCTGGAT	miRNA	hsa-miR-200a-5p	mature	novel	templated	human	23	562	0	22	1	0	three_temp	three_prime	10	0	0	0
CATCTTACCGGACAGTGCTGGG	miRNA	hsa-miR-200a-5p	mature	novel	non-templated	human	22	999	0	21	1	0	three_non-temp	three_prime	6	0	0	0
CATCTTACCGGACAGTGCTGGT	miRNA	hsa-miR-200a-5p	mature	novel	non-templated	human	22	760	0	21	1	0	three_non-temp	three_prime	9	0	0	0
CATCTTACTGGGCAGCATTGG	miRNA	hsa-miR-200b-5p	mature	novel	templated	human	21	4372	0	21	1	0	three_temp	three_prime	3	0	1	0
CATCTTACTGGGCAGCATTGGA	miRNA	hsa-miR-200b-5p	mature	novel	templated	human	22	8982	0	22	0	1	mature	mature	1	1	1	0
CATCTTACTGGGCAGCATTGGAA	miRNA	hsa-miR-200b-5p	mature	novel	non-templated	human	23	392	0	22	1	0	three_non-temp	three_prime	6	0	0	0
CATGACACGATCACTCCCGTTGAGT	miRNA	bta-miR-425-5p	mature	novel	non-templated	cattle	25	618	1	22	2	0	both_non-temp	both	2	0	1	0
CATGCCTTGAGTGTAGGACCA	miRNA	ssc-miR-532-5p	mature	known	non-templated	pig	21	637	0	20	2	0	three_non-temp	three_prime	10	0	0	0
CATGCCTTGAGTGTAGGACCG	miRNA	ssc-miR-532-5p	mature	known	templated	pig	21	5847	0	21	1	0	three_temp	three_prime	4	0	1	0
CATGCCTTGAGTGTAGGACCGA	miRNA	ssc-miR-532-5p	mature	known	non-templated	pig	22	1524	0	21	1	0	three_non-temp	three_prime	7	0	0	0
CATGCCTTGAGTGTAGGACCGC	miRNA	ssc-miR-532-5p	mature	known	non-templated	pig	22	16549	0	21	1	0	three_non-temp	three_prime	2	0	1	0
CATGCCTTGAGTGTAGGACCGG	miRNA	ssc-miR-532-5p	mature	known	non-templated	pig	22	1903	0	21	1	0	three_non-temp	three_prime	6	0	0	0
CATGCCTTGAGTGTAGGACCGT	miRNA	ssc-miR-532-5p	mature	known	templated	pig	22	73679	0	22	0	1	mature	mature	1	1	1	0
CATGCCTTGAGTGTAGGACCGTA	miRNA	ssc-miR-532-5p	mature	known	non-templated	pig	23	468	0	22	1	0	three_non-temp	three_prime	11	0	0	0
CATGCCTTGAGTGTAGGACCGTT	miRNA	ssc-miR-532-5p	mature	known	templated	pig	23	351	0	22	1	0	three_temp	three_prime	12	0	0	0
CATGCCTTGAGTGTAGGACCT	miRNA	ssc-miR-532-5p	mature	known	non-templated	pig	21	318	0	20	2	0	three_non-temp	three_prime	13	0	0	0
CATGTCCGCGGGTTCCCTATCC	miRNA	ssc-miR-7134-5p	mature	known	non-templated	pig	22	500	1	21	0	0	five_non-temp	five_prime	7	0	0	0
CATTGCACTTGTCTCGGTCT	miRNA	bta-miR-25	mature	novel	templated	cattle	20	824	0	20	2	0	three_temp	three_prime	9	0	0	0
CATTGCACTTGTCTCGGTCTG	miRNA	bta-miR-25	mature	novel	templated	cattle	21	6263	0	21	1	0	three_temp	three_prime	2	0	1	0
CATTGCACTTGTCTCGGTCTGA	miRNA	bta-miR-25	mature	novel	templated	cattle	22	21562	0	22	0	1	mature	mature	1	1	1	0
CATTGCACTTGTCTCGGTCTGAA	miRNA	bta-miR-25	mature	novel	non-templated	cattle	23	2196	0	22	1	0	three_non-temp	three_prime	6	0	0	0
CATTGCACTTGTCTCGGTCTGAAA	miRNA	bta-miR-25	mature	novel	non-templated	cattle	24	3161	0	22	2	0	three_non-temp	three_prime	4	0	1	0
CATTGCACTTGTCTCGGTCTGAAAA	miRNA	bta-miR-25	mature	novel	non-templated	cattle	25	521	0	22	3	0	three_non-temp	three_prime	12	0	0	0
CATTGCACTTGTCTCGGTCTGAAT	miRNA	bta-miR-25	mature	novel	non-templated	cattle	24	684	0	22	2	0	three_non-temp	three_prime	10	0	0	0
CATTGCACTTGTCTCGGTCTGAC	miRNA	bta-miR-25	mature	novel	templated	cattle	23	455	0	22	1	0	three_temp	three_prime	14	0	0	0
CATTGCACTTGTCTCGGTCTGAT	miRNA	bta-miR-25	mature	novel	non-templated	cattle	23	1334	0	22	1	0	three_non-temp	three_prime	7	0	0	0
CATTGCACTTGTCTCGGTCTGC	miRNA	bta-miR-25	mature	novel	non-templated	cattle	22	585	0	21	1	0	three_non-temp	three_prime	11	0	0	0
CATTGCACTTGTCTCGGTCTGG	miRNA	bta-miR-25	mature	novel	non-templated	cattle	22	465	0	21	1	0	three_non-temp	three_prime	13	0	0	0
CATTGCACTTGTCTCGGTCTGT	miRNA	bta-miR-25	mature	novel	non-templated	cattle	22	2288	0	21	1	0	three_non-temp	three_prime	5	0	1	0
CCACAGGGTAGAACCACGGA	miRNA	ssc-miR-140-3p	mature	known	templated	pig	20	494	-2	20	-1	0	both_temp	both	12	0	0	0
CCACAGGGTAGAACCACGGAC	miRNA	ssc-miR-140-3p	mature	known	templated	pig	21	1375	2	21	0	0	five_temp	five_prime	6	0	0	0
CCACAGGGTAGAACCACGGACA	miRNA	ssc-miR-140-3p	mature	known	templated	pig	22	408	-2	21	1	0	both_temp	both	14	0	0	0
CCACCTCCCCTGCAAACGTCC	miRNA	ssc-miR-1306-5p	mature	known	templated	pig	21	526	0	21	1	0	three_temp	three_prime	2	0	1	0
CCACCTCCCCTGCAAACGTCCA	miRNA	ssc-miR-1306-5p	mature	known	templated	pig	22	1980	0	22	0	1	mature	mature	1	1	1	0
CCCCAGGTGTGATTCTGATTTGC	miRNA	ssc-miR-361-3p	mature	known	templated	pig	23	604	1	23	0	0	five_temp	five_prime	5	0	1	0
CCCCCAGGTGTGATTCTGATTTGC	miRNA	ssc-miR-361-3p	mature	known	templated	pig	24	3333	0	24	0	1	mature	mature	1	1	1	0
CCCCCAGGTGTGATTCTGATTTGT	miRNA	ssc-miR-361-3p	mature	known	non-templated	pig	24	904	0	23	1	0	three_non-temp	three_prime	3	0	1	0
CCCTGAGACCCTAACTTGTGA	miRNA	ssc-miR-125b	mature	known	templated	pig	21	511	1	21	0	0	five_temp	five_prime	6	0	0	0
CCCTGAGACCCTTTAACCTGT	miRNA	ssc-miR-125a	mature	known	templated	pig	21	879	-1	21	-1	0	both_temp	both	8	0	0	0
CCCTGAGACCCTTTAACCTGTG	miRNA	ssc-miR-125a	mature	known	templated	pig	22	1007	1	22	0	0	five_temp	five_prime	6	0	0	0
CCCTGAGACCCTTTAACCTGTGA	miRNA	ssc-miR-125a	mature	known	templated	pig	23	365	-1	22	1	0	both_temp	both	10	0	0	0
CCCTGTAGAACCGAATTTG	miRNA	ssc-miR-10b	mature	known	templated	pig	19	486	-2	19	-1	0	both_temp	both	20	0	0	0
CCCTGTAGAACCGAATTTGTA	miRNA	ssc-miR-10b	mature	known	non-templated	pig	21	465	-2	20	1	0	both_non-temp	both	22	0	0	0
CCCTGTAGAACCGAATTTGTG	miRNA	ssc-miR-10b	mature	known	templated	pig	21	7036	-2	20	1	0	both_temp	both	7	0	0	0
CCCTGTAGAACCGAATTTGTGC	miRNA	bta-miR-10b	mature	novel	non-templated	cattle	22	405	-2	21	1	0	both_non-temp	both	5	0	1	0
CCCTGTAGAACCGAATTTGTGT	miRNA	bta-miR-10b	mature	novel	templated	cattle	22	1689	-2	21	1	0	both_temp	both	4	0	1	0
CCCTGTAGATCCGAATTTG	miRNA	ssc-miR-10a-5p	mature	known	templated	pig	19	599	-2	19	-1	0	both_temp	both	30	0	0	0
CCCTGTAGATCCGAATTTGC	miRNA	ssc-miR-10a-5p	mature	known	non-templated	pig	20	816	-2	19	1	0	both_non-temp	both	27	0	0	0
CCCTGTAGATCCGAATTTGT	miRNA	ssc-miR-10a-5p	mature	known	templated	pig	20	3476	2	20	0	0	five_temp	five_prime	13	0	0	0
CCCTGTAGATCCGAATTTGTA	miRNA	ssc-miR-10a-5p	mature	known	non-templated	pig	21	304	-2	20	1	0	both_non-temp	both	34	0	0	0
CCCTGTAGATCCGAATTTGTG	miRNA	ssc-miR-10a-5p	mature	known	templated	pig	21	4408	-2	20	1	0	both_temp	both	12	0	0	0
CCCTGTAGATCCGAATTTGTGA	miRNA	bta-miR-10a	mature	novel	non-templated	cattle	22	910	-2	21	1	0	both_non-temp	both	5	0	1	0
CCCTGTAGATCCGAATTTGTGT	miRNA	bta-miR-10a	mature	novel	templated	cattle	22	1418	-2	21	1	0	both_temp	both	4	0	1	0
CCCTGTCCTCCAGGAGCTCAC	miRNA	ssc-miR-339-5p	mature	known	templated	pig	21	809	1	21	0	0	five_temp	five_prime	3	0	1	0
CCGCACTGTGGGTACTTGCT	miRNA	hsa-miR-106b-3p	mature	novel	templated	human	20	443	0	20	2	0	three_temp	three_prime	4	0	1	0
CCGCACTGTGGGTACTTGCTG	miRNA	hsa-miR-106b-3p	mature	novel	templated	human	21	3910	0	21	1	0	three_temp	three_prime	1	1	1	0
CCGCACTGTGGGTACTTGCTGCA	miRNA	hsa-miR-106b-3p	mature	novel	non-templated	human	23	535	0	22	1	0	three_non-temp	three_prime	3	0	1	0
CCGTCCTAAGGTTGTTGAGTT	miRNA	ssc-miR-676-3p	mature	known	templated	pig	21	768	0	21	0	1	mature	mature	1	1	1	0
CCGTCCTAAGGTTGTTGAGTTT	miRNA	ssc-miR-676-3p	mature	known	non-templated	pig	22	741	0	21	1	0	three_non-temp	three_prime	2	0	1	0
CCTCCCACACCCAAGGCTTGCA	miRNA	ssc-miR-532-3p	mature	known	templated	pig	22	375	0	22	0	1	mature	mature	1	1	1	0
CCTCCTGGGGCCCGCACTCTCG	miRNA	ssc-miR-1343	mature	known	templated	pig	22	326	1	21	1	0	both_temp	both	5	0	1	0
CCTTCATTCCACCGGAGTCTGA	miRNA	ssc-miR-205	mature	known	non-templated	pig	22	388	-1	21	1	0	both_non-temp	both	4	0	1	0
CCTTCATTCCACCGGAGTCTGT	miRNA	ssc-miR-205	mature	known	non-templated	pig	22	252	-1	21	1	0	both_non-temp	both	5	0	1	0
CGAATCATTATTTGCTGCTCT	miRNA	hsa-miR-15b-3p	mature	novel	templated	human	21	582	0	21	1	0	three_temp	three_prime	1	1	1	0
CGAATCATTATTTGCTGCTCTA	miRNA	hsa-miR-15b-3p	mature	novel	templated	human	22	287	0	22	0	1	mature	mature	2	0	1	0
CGATGATGGTCCCTGTGTTTG	miRNA	ssc-miR-2320-3p	mature	known	templated	pig	21	663	0	21	0	1	mature	mature	2	0	1	0
CGATGATGGTCCCTGTGTTTGT	miRNA	ssc-miR-2320-3p	mature	known	non-templated	pig	22	610	0	21	1	0	three_non-temp	three_prime	3	0	1	0
CGCACTGTGGGTACTTGCTG	miRNA	hsa-miR-106b-3p	mature	novel	templated	human	20	675	-1	20	-1	0	both_temp	both	2	0	1	0
CGTACCGTGAGTAATAATGCG	miRNA	ssc-miR-126-3p	mature	known	templated	pig	21	414	1	21	0	0	five_temp	five_prime	2	0	1	0
CGTCAACACTTGCTGGTTTCCTC	miRNA	ssc-miR-505	mature	known	templated	pig	23	608	2	21	1	0	both_temp	both	2	0	1	0
CGTCAACACTTGCTGGTTTCCTCT	miRNA	ssc-miR-505	mature	known	templated	pig	24	580	2	22	0	0	five_temp	five_prime	4	0	1	0
CTAAGTGCTTCCATGTTTTAGTAG	miRNA	bta-miR-302b	mature	novel	non-templated	cattle	24	1225	1	23	0	0	five_non-temp	five_prime	19	0	0	0
CTAATACTGCCTGGTAATGATGAC	miRNA	bta-miR-200b	mature	novel	templated	cattle	24	506	1	21	2	0	both_temp	both	24	0	0	0
CTACAGTACTGTGATAACTGAA	miRNA	ssc-miR-101	mature	known	non-templated	pig	22	1350	1	21	0	0	five_non-temp	five_prime	12	0	0	0
CTAGACTGAAGCTCCTTG	miRNA	ssc-miR-151-3p	mature	known	templated	pig	18	867	0	18	4	0	three_temp	three_prime	16	0	0	0
CTAGACTGAAGCTCCTTGA	miRNA	ssc-miR-151-3p	mature	known	templated	pig	19	818	0	19	3	0	three_temp	three_prime	17	0	0	0
CTAGACTGAAGCTCCTTGAG	miRNA	ssc-miR-151-3p	mature	known	templated	pig	20	1017	0	20	2	0	three_temp	three_prime	14	0	0	0
CTAGACTGAAGCTCCTTGAGA	miRNA	ssc-miR-151-3p	mature	known	non-templated	pig	21	3347	0	20	2	0	three_non-temp	three_prime	7	0	0	0
CTAGACTGAAGCTCCTTGAGC	miRNA	ssc-miR-151-3p	mature	known	non-templated	pig	21	959	0	20	2	0	three_non-temp	three_prime	15	0	0	0
CTAGACTGAAGCTCCTTGAGG	miRNA	ssc-miR-151-3p	mature	known	templated	pig	21	36071	0	21	1	0	three_temp	three_prime	1	1	1	0
CTAGACTGAAGCTCCTTGAGGA	miRNA	ssc-miR-151-3p	mature	known	templated	pig	22	19826	0	22	0	1	mature	mature	2	0	1	0
CTAGACTGAAGCTCCTTGAGGAA	miRNA	ssc-miR-151-3p	mature	known	non-templated	pig	23	6511	0	22	1	0	three_non-temp	three_prime	4	0	1	0
CTAGACTGAAGCTCCTTGAGGAAA	miRNA	ssc-miR-151-3p	mature	known	non-templated	pig	24	3196	0	22	2	0	three_non-temp	three_prime	8	0	0	0
CTAGACTGAAGCTCCTTGAGGAAT	miRNA	ssc-miR-151-3p	mature	known	non-templated	pig	24	616	0	22	2	0	three_non-temp	three_prime	19	0	0	0
CTAGACTGAAGCTCCTTGAGGAT	miRNA	ssc-miR-151-3p	mature	known	non-templated	pig	23	597	0	22	1	0	three_non-temp	three_prime	20	0	0	0
CTAGACTGAAGCTCCTTGAGGC	miRNA	ssc-miR-151-3p	mature	known	non-templated	pig	22	1248	0	21	1	0	three_non-temp	three_prime	12	0	0	0
CTAGACTGAAGCTCCTTGAGGG	miRNA	ssc-miR-151-3p	mature	known	non-templated	pig	22	450	0	21	1	0	three_non-temp	three_prime	23	0	0	0
CTAGACTGAAGCTCCTTGAGGT	miRNA	ssc-miR-151-3p	mature	known	non-templated	pig	22	4233	0	21	1	0	three_non-temp	three_prime	5	0	1	0
CTAGACTGAAGCTCCTTGAGGTA	miRNA	ssc-miR-151-3p	mature	known	non-templated	pig	23	551	0	21	2	0	three_non-temp	three_prime	22	0	0	0
CTAGACTGAAGCTCCTTGAGGTAT	miRNA	ssc-miR-151-3p	mature	known	non-templated	pig	24	372	0	21	3	0	three_non-temp	three_prime	24	0	0	0
CTAGACTGAAGCTCCTTGAGT	miRNA	ssc-miR-151-3p	mature	known	non-templated	pig	21	1997	0	20	2	0	three_non-temp	three_prime	10	0	0	0
CTAGCACCATCTGAAATCGGTC	miRNA	ssc-miR-29a	mature	known	non-templated	pig	22	396	0	21	2	0	three_non-temp	three_prime	5	0	1	0
CTAGCACCATCTGAAATCGGTT	miRNA	ssc-miR-29a	mature	known	templated	pig	22	1887	0	22	1	0	three_temp	three_prime	2	0	1	0
CTAGCACCATTTGAAATCAGTGT	miRNA	ssc-miR-29b	mature	known	templated	pig	23	754	1	22	1	0	both_temp	both	1	1	1	0
CTAGCTTATCAGACTGATGTTGAC	miRNA	ssc-miR-21	mature	known	non-templated	pig	24	3762	1	22	1	0	both_non-temp	both	26	0	0	0
CTAGCTTATCAGACTGATGTTGAT	miRNA	ssc-miR-21	mature	known	non-templated	pig	24	442	1	22	1	0	both_non-temp	both	65	0	0	0
CTAGTGATTTTGTTGTT	miRNA	ssc-miR-7	mature	known	templated	pig	17	840	7	17	0	0	five_temp	five_prime	37	0	0	0
CTATACGACCTGCTGCCTTTC	miRNA	ssc-let-7d-3p	mature	known	templated	pig	21	531	0	21	1	0	three_temp	three_prime	1	1	1	0
CTATTGCACTTGTCCCGGCCTGT	miRNA	ssc-miR-92a	mature	known	non-templated	pig	23	446	1	22	0	0	five_non-temp	five_prime	38	0	0	0
CTCAAACTGTGGGGGCA	miRNA	ssc-miR-371-5p	mature	known	templated	pig	17	4571	-1	17	-4	0	both_temp	both	50	0	0	0
CTCAAACTGTGGGGGCAC	miRNA	ssc-miR-371-5p	mature	known	templated	pig	18	6049	-1	18	-3	0	both_temp	both	46	0	0	0
CTCAAACTGTGGGGGCACA	miRNA	ssc-miR-371-5p	mature	known	non-templated	pig	19	1359	-1	18	-3	0	both_non-temp	both	82	0	0	0
CTCAAACTGTGGGGGCACC	miRNA	ssc-miR-371-5p	mature	known	non-templated	pig	19	5154	-1	18	-3	0	both_non-temp	both	48	0	0	0
CTCAAACTGTGGGGGCACCTT	miRNA	hsa-miR-371a-5p	mature	novel	non-templated	human	21	1024	-1	18	3	0	both_non-temp	both	14	0	0	0
CTCAAACTGTGGGGGCACCTTC	miRNA	hsa-miR-371a-5p	mature	novel	non-templated	human	22	529	-1	18	4	0	both_non-temp	both	21	0	0	0
CTCAAACTGTGGGGGCACG	miRNA	ssc-miR-371-5p	mature	known	non-templated	pig	19	752	-1	18	-3	0	both_non-temp	both	100	0	0	0
CTCAAACTGTGGGGGCACT	miRNA	ssc-miR-371-5p	mature	known	templated	pig	19	22963	-1	19	-2	0	both_temp	both	27	0	0	0
CTCAAACTGTGGGGGCACTA	miRNA	ssc-miR-371-5p	mature	known	non-templated	pig	20	2784	-1	19	-2	0	both_non-temp	both	60	0	0	0
CTCAAACTGTGGGGGCACTC	miRNA	ssc-miR-371-5p	mature	known	non-templated	pig	20	18602	-1	19	-2	0	both_non-temp	both	28	0	0	0
CTCAAACTGTGGGGGCACTG	miRNA	ssc-miR-371-5p	mature	known	non-templated	pig	20	1718	-1	19	-2	0	both_non-temp	both	75	0	0	0
CTCAAACTGTGGGGGCACTT	miRNA	ssc-miR-371-5p	mature	known	templated	pig	20	95471	-1	20	-1	0	both_temp	both	11	0	0	0
CTCAAACTGTGGGGGCACTTA	miRNA	ssc-miR-371-5p	mature	known	non-templated	pig	21	14071	-1	20	1	0	both_non-temp	both	33	0	0	0
CTCAAACTGTGGGGGCACTTAA	miRNA	ssc-miR-371-5p	mature	known	non-templated	pig	22	2913	-1	20	2	0	both_non-temp	both	59	0	0	0
CTCAAACTGTGGGGGCACTTAAA	miRNA	ssc-miR-371-5p	mature	known	non-templated	pig	23	1624	-1	20	3	0	both_non-temp	both	78	0	0	0
CTCAAACTGTGGGGGCACTTAAC	miRNA	ssc-miR-371-5p	mature	known	non-templated	pig	23	589	-1	20	3	0	both_non-temp	both	110	0	0	0
CTCAAACTGTGGGGGCACTTAAG	miRNA	ssc-miR-371-5p	mature	known	non-templated	pig	23	981	-1	20	3	0	both_non-temp	both	92	0	0	0
CTCAAACTGTGGGGGCACTTAAT	miRNA	ssc-miR-371-5p	mature	known	non-templated	pig	23	716	-1	20	3	0	both_non-temp	both	102	0	0	0
CTCAAACTGTGGGGGCACTTAC	miRNA	ssc-miR-371-5p	mature	known	non-templated	pig	22	2187	-1	20	2	0	both_non-temp	both	67	0	0	0
CTCAAACTGTGGGGGCACTTAG	miRNA	ssc-miR-371-5p	mature	known	non-templated	pig	22	1914	-1	20	2	0	both_non-temp	both	71	0	0	0
CTCAAACTGTGGGGGCACTTAGA	miRNA	ssc-miR-371-5p	mature	known	non-templated	pig	23	451	-1	20	3	0	both_non-temp	both	128	0	0	0
CTCAAACTGTGGGGGCACTTAT	miRNA	ssc-miR-371-5p	mature	known	non-templated	pig	22	757	-1	20	2	0	both_non-temp	both	99	0	0	0
CTCAAACTGTGGGGGCACTTC	miRNA	ssc-miR-371-5p	mature	known	templated	pig	21	65143	-1	20	1	0	both_temp	both	13	0	0	0
CTCAAACTGTGGGGGCACTTCA	miRNA	ssc-miR-371-5p	mature	known	non-templated	pig	22	257	-1	20	2	0	both_non-temp	both	138	0	0	0
CTCAAACTGTGGGGGCACTTCC	miRNA	ssc-miR-371-5p	mature	known	templated	pig	22	738	-1	20	2	0	both_temp	both	101	0	0	0
CTCAAACTGTGGGGGCACTTG	miRNA	ssc-miR-371-5p	mature	known	non-templated	pig	21	9958	-1	20	1	0	both_non-temp	both	35	0	0	0
CTCAAACTGTGGGGGCACTTGA	miRNA	ssc-miR-371-5p	mature	known	non-templated	pig	22	952	-1	20	2	0	both_non-temp	both	93	0	0	0
CTCAAACTGTGGGGGCACTTGC	miRNA	ssc-miR-371-5p	mature	known	non-templated	pig	22	537	-1	20	2	0	both_non-temp	both	116	0	0	0
CTCAAACTGTGGGGGCACTTT	miRNA	ssc-miR-371-5p	mature	known	templated	pig	21	392483	1	21	0	0	five_temp	five_prime	4	0	1	0
CTCAAACTGTGGGGGCACTTTA	miRNA	ssc-miR-371-5p	mature	known	non-templated	pig	22	34400	-1	21	1	0	both_non-temp	both	19	0	0	0
CTCAAACTGTGGGGGCACTTTC	miRNA	ssc-miR-371-5p	mature	known	templated	pig	22	137033	-1	21	1	0	both_temp	both	8	0	0	0
CTCAAACTGTGGGGGCACTTTG	miRNA	ssc-miR-371-5p	mature	known	non-templated	pig	22	27787	-1	21	1	0	both_non-temp	both	21	0	0	0
CTCAAACTGTGGGGGCACTTTT	miRNA	ssc-miR-371-5p	mature	known	non-templated	pig	22	8979	-1	21	1	0	both_non-temp	both	39	0	0	0
CTCAAACTGTGGGGGCAT	miRNA	ssc-miR-371-5p	mature	known	non-templated	pig	18	1198	-1	17	-4	0	both_non-temp	both	84	0	0	0
CTCCGTTTGCCTGTTTTGCTG	miRNA	ssc-miR-1468	mature	known	templated	pig	21	411	0	21	1	0	three_temp	three_prime	2	0	1	0
CTCCGTTTGCCTGTTTTGCTGA	miRNA	ssc-miR-1468	mature	known	templated	pig	22	719	0	22	0	1	mature	mature	1	1	1	0
CTCCTGACTCCAGGTCCTGTG	miRNA	hsa-miR-378a-5p	mature	novel	templated	human	21	2892	0	21	1	0	three_temp	three_prime	2	0	1	0
CTCCTGACTCCAGGTCCTGTGC	miRNA	hsa-miR-378a-5p	mature	novel	non-templated	human	22	933	0	21	1	0	three_non-temp	three_prime	3	0	1	0
CTCCTGACTCCAGGTCCTGTGT	miRNA	hsa-miR-378a-5p	mature	novel	templated	human	22	3596	0	22	0	1	mature	mature	1	1	1	0
CTCCTGGGGCCCGCACTCTCG	miRNA	ssc-miR-1343	mature	known	templated	pig	21	880	0	21	1	0	three_temp	three_prime	3	0	1	0
CTCCTGGGGCCCGCACTCTCGC	miRNA	ssc-miR-1343	mature	known	templated	pig	22	3174	0	22	0	1	mature	mature	1	1	1	0
CTCCTGGGGCCCGCACTCTCGT	miRNA	ssc-miR-1343	mature	known	non-templated	pig	22	1151	0	21	1	0	three_non-temp	three_prime	2	0	1	0
CTCGGCGTGGCGTCGGTCG	miRNA	ssc-miR-1307	mature	known	templated	pig	19	398	-1	19	-2	0	both_temp	both	28	0	0	0
CTCGGCGTGGCGTCGGTCGC	miRNA	ssc-miR-1307	mature	known	non-templated	pig	20	1023	-1	19	-2	0	both_non-temp	both	20	0	0	0
CTCGGCGTGGCGTCGGTCGT	miRNA	ssc-miR-1307	mature	known	templated	pig	20	4540	-1	20	-1	0	both_temp	both	9	0	0	0
CTCGGCGTGGCGTCGGTCGTA	miRNA	ssc-miR-1307	mature	known	non-templated	pig	21	944	-1	20	1	0	both_non-temp	both	21	0	0	0
CTCGGCGTGGCGTCGGTCGTG	miRNA	ssc-miR-1307	mature	known	templated	pig	21	12823	1	21	0	0	five_temp	five_prime	4	0	1	0
CTCGGCGTGGCGTCGGTCGTGA	miRNA	ssc-miR-1307	mature	known	non-templated	pig	22	7988	-1	21	1	0	both_non-temp	both	7	0	0	0
CTCGGCGTGGCGTCGGTCGTGC	miRNA	ssc-miR-1307	mature	known	non-templated	pig	22	2706	-1	21	1	0	both_non-temp	both	13	0	0	0
CTCGGCGTGGCGTCGGTCGTGG	miRNA	ssc-miR-1307	mature	known	templated	pig	22	86165	-1	21	1	0	both_temp	both	2	0	1	0
CTCGGCGTGGCGTCGGTCGTGT	miRNA	ssc-miR-1307	mature	known	non-templated	pig	22	4970	-1	21	1	0	both_non-temp	both	8	0	0	0
CTCTTTCCCTGTTGCACTAC	miRNA	hsa-miR-130b-5p	mature	novel	templated	human	20	659	1	20	0	0	five_temp	five_prime	5	0	1	0
CTCTTTCCCTGTTGCACTACC	miRNA	hsa-miR-130b-5p	mature	novel	non-templated	human	21	474	-1	20	1	0	both_non-temp	both	7	0	0	0
CTCTTTCCCTGTTGCACTACT	miRNA	hsa-miR-130b-5p	mature	novel	templated	human	21	1973	-1	20	1	0	both_temp	both	4	0	1	0
CTGACCTATGAATTGACAGCC	miRNA	ssc-miR-192	mature	known	templated	pig	21	1161	0	21	0	1	mature	mature	1	1	1	0
CTGACCTATGAATTGACAGCCAT	miRNA	ssc-miR-192	mature	known	non-templated	pig	23	365	0	21	2	0	three_non-temp	three_prime	3	0	1	0
CTGACCTATGAATTGACAGCT	miRNA	ssc-miR-192	mature	known	non-templated	pig	21	466	0	20	1	0	three_non-temp	three_prime	2	0	1	0
CTGCCTGGTAATGATGAC	miRNA	hsa-miR-200b-3p	mature	novel	templated	human	18	2488	-5	17	1	0	both_temp	both	4	0	1	0
CTGGAAGACTAGTGATTTTGTTGTT	miRNA	ssc-miR-7	mature	known	templated	pig	25	714	1	24	0	0	five_temp	five_prime	39	0	0	0
CTGGACTTGGAGTCAGA	miRNA	ssc-miR-378b-3p	mature	known	templated	pig	17	5513	-1	17	-3	0	both_temp	both	6	0	0	0
CTGGACTTGGAGTCAGAA	miRNA	ssc-miR-378b-3p	mature	known	templated	pig	18	5659	-1	18	-2	0	both_temp	both	5	0	1	0
CTGGACTTGGAGTCAGAAG	miRNA	ssc-miR-378b-3p	mature	known	templated	pig	19	2326	-1	19	-1	0	both_temp	both	9	0	0	0
CTGGACTTGGAGTCAGAAGA	miRNA	ssc-miR-378b-3p	mature	known	templated	pig	20	2531	-1	19	1	0	both_temp	both	8	0	0	0
CTGGACTTGGAGTCAGAAGAC	miRNA	ssc-miR-378b-3p	mature	known	templated	pig	21	413	-1	19	2	0	both_temp	both	17	0	0	0
CTGGACTTGGAGTCAGAAGC	miRNA	ssc-miR-378b-3p	mature	known	templated	pig	20	675	-1	19	1	0	both_temp	both	14	0	0	0
CTGGACTTGGAGTCAGAAGG	miRNA	ssc-miR-378	mature	known	templated	pig	20	39889	-1	20	-1	0	both_temp	both	7	0	0	0
CTGGACTTGGAGTCAGAAGGA	miRNA	ssc-miR-378	mature	known	non-templated	pig	21	9984	-1	20	1	0	both_non-temp	both	12	0	0	0
CTGGACTTGGAGTCAGAAGGC	miRNA	ssc-miR-378	mature	known	templated	pig	21	257636	1	21	0	0	five_temp	five_prime	2	0	1	0
CTGGACTTGGAGTCAGAAGGCA	miRNA	ssc-miR-378	mature	known	non-templated	pig	22	20178	-1	21	1	0	both_non-temp	both	9	0	0	0
CTGGACTTGGAGTCAGAAGGCAA	miRNA	ssc-miR-378b-3p	mature	known	non-templated	pig	23	921	-1	19	4	0	both_non-temp	both	12	0	0	0
CTGGACTTGGAGTCAGAAGGCC	miRNA	ssc-miR-378	mature	known	templated	pig	22	4901	-1	21	1	0	both_temp	both	14	0	0	0
CTGGACTTGGAGTCAGAAGGCG	miRNA	ssc-miR-378	mature	known	non-templated	pig	22	3012	-1	21	1	0	both_non-temp	both	21	0	0	0
CTGGACTTGGAGTCAGAAGGCT	miRNA	ssc-miR-378	mature	known	templated	pig	22	4836	-1	21	1	0	both_temp	both	15	0	0	0
CTGGACTTGGAGTCAGAAGGG	miRNA	ssc-miR-378	mature	known	non-templated	pig	21	1064	-1	20	1	0	both_non-temp	both	26	0	0	0
CTGGACTTGGAGTCAGAAGGT	miRNA	ssc-miR-378	mature	known	non-templated	pig	21	57665	-1	20	1	0	both_non-temp	both	6	0	0	0
CTGGACTTGGAGTCAGAAGT	miRNA	ssc-miR-378b-3p	mature	known	templated	pig	20	442	1	20	0	0	five_temp	five_prime	16	0	0	0
CTGGCTCCGTGTCTTCACTCCC	miRNA	ssc-miR-149	mature	known	templated	pig	22	385	1	22	0	0	five_temp	five_prime	5	0	1	0
CTGGGAGAAGGCTGTTTACTCT	miRNA	ssc-miR-30c-3p	mature	known	templated	pig	22	388	0	22	0	1	mature	mature	1	1	1	0
CTGTAAACGCTTTCTGATG	miRNA	hsa-miR-3607-3p	mature	novel	templated	human	19	1318	1	19	0	0	five_temp	five_prime	1	1	1	0
CTGTCTGGTAACGATGTC	miRNA	bta-miR-200a	mature	novel	non-templated	cattle	18	685	-5	17	1	0	both_non-temp	both	29	0	0	0
CTGTCTGGTAACGATGTT	miRNA	bta-miR-200a	mature	novel	templated	cattle	18	3359	5	18	0	0	five_temp	five_prime	13	0	0	0
CTGTGCGTGTGACAGCGGCTGA	miRNA	ssc-miR-210	mature	known	templated	pig	22	1227	0	22	0	1	mature	mature	3	0	1	0
CTGTGCGTGTGACAGCGGCTGAA	miRNA	ssc-miR-210	mature	known	non-templated	pig	23	1116	0	22	1	0	three_non-temp	three_prime	4	0	1	0
CTGTGCGTGTGACAGCGGCTGAAAA	miRNA	ssc-miR-210	mature	known	non-templated	pig	25	520	0	22	3	0	three_non-temp	three_prime	7	0	0	0
CTGTGCGTGTGACAGCGGCTGAAC	miRNA	ssc-miR-210	mature	known	non-templated	pig	24	576	0	22	2	0	three_non-temp	three_prime	6	0	0	0
CTGTGCGTGTGACAGCGGCTGAAT	miRNA	ssc-miR-210	mature	known	non-templated	pig	24	1375	0	22	2	0	three_non-temp	three_prime	2	0	1	0
CTGTGCGTGTGACAGCGGCTGT	miRNA	ssc-miR-210	mature	known	non-templated	pig	22	768	0	21	1	0	three_non-temp	three_prime	5	0	1	0
CTTAAACGTGGATGTACTTG	miRNA	hsa-miR-302a-5p	mature	novel	templated	human	20	2238	-1	20	-2	0	both_temp	both	19	0	0	0
CTTAAACGTGGATGTACTTGA	miRNA	hsa-miR-302a-5p	mature	novel	non-templated	human	21	306	-1	20	-2	0	both_non-temp	both	41	0	0	0
CTTAAACGTGGATGTACTTGC	miRNA	hsa-miR-302a-5p	mature	novel	templated	human	21	8882	-1	21	-1	0	both_temp	both	13	0	0	0
CTTAAACGTGGATGTACTTGCA	miRNA	hsa-miR-302a-5p	mature	novel	non-templated	human	22	1124	-1	21	1	0	both_non-temp	both	30	0	0	0
CTTAAACGTGGATGTACTTGCC	miRNA	hsa-miR-302a-5p	mature	novel	non-templated	human	22	4331	-1	21	1	0	both_non-temp	both	15	0	0	0
CTTAAACGTGGATGTACTTGCG	miRNA	hsa-miR-302a-5p	mature	novel	non-templated	human	22	616	-1	21	1	0	both_non-temp	both	36	0	0	0
CTTAAACGTGGATGTACTTGCT	miRNA	hsa-miR-302a-5p	mature	novel	templated	human	22	18986	1	22	0	0	five_temp	five_prime	5	0	1	0
CTTAAACGTGGATGTACTTGCTT	miRNA	hsa-miR-302a-5p	mature	novel	templated	human	23	1644	-1	22	1	0	both_temp	both	23	0	0	0
CTTAAACGTGGATGTACTTGT	miRNA	hsa-miR-302a-5p	mature	novel	non-templated	human	21	2016	-1	20	-2	0	both_non-temp	both	20	0	0	0
CTTATCAGACTGATGTTGAC	miRNA	ssc-miR-21	mature	known	templated	pig	20	1257	-3	19	1	0	both_temp	both	44	0	0	0
CTTATCAGGTTGTATTATCATT	miRNA	ssc-miR-374b-3p	mature	known	templated	pig	22	452	0	22	0	1	mature	mature	1	1	1	0
CTTATCAGGTTGTATTGTAATC	miRNA	ssc-miR-374a-3p	mature	known	non-templated	pig	22	576	0	21	1	0	three_non-temp	three_prime	3	0	1	0
CTTATCAGGTTGTATTGTAATT	miRNA	ssc-miR-374a-3p	mature	known	templated	pig	22	3684	0	22	0	1	mature	mature	1	1	1	0
CTTCAAGTAATCCAGGATAGGCC	miRNA	ssc-miR-26a	mature	known	non-templated	pig	23	802	1	21	1	0	both_non-temp	both	17	0	0	0
CTTCAAGTAATCCAGGATAGGCT	miRNA	ssc-miR-26a	mature	known	non-templated	pig	23	3268	1	22	0	0	five_non-temp	five_prime	8	0	0	0
CTTCCATGTTTTAGTAG	miRNA	bta-miR-302b	mature	novel	templated	cattle	17	2297	6	17	0	0	five_temp	five_prime	15	0	0	0
CTTTCAGTCGGATGTTTAC	miRNA	ssc-miR-30e-3p	mature	known	templated	pig	19	1124	0	19	3	0	three_temp	three_prime	5	0	1	0
CTTTCAGTCGGATGTTTACAG	miRNA	ssc-miR-30e-3p	mature	known	templated	pig	21	2036	0	21	1	0	three_temp	three_prime	2	0	1	0
CTTTCAGTCGGATGTTTACAGC	miRNA	ssc-miR-30e-3p	mature	known	templated	pig	22	6487	0	22	0	1	mature	mature	1	1	1	0
CTTTCAGTCGGATGTTTACAGT	miRNA	ssc-miR-30e-3p	mature	known	non-templated	pig	22	1689	0	21	1	0	three_non-temp	three_prime	3	0	1	0
CTTTCAGTCGGATGTTTACAGTT	miRNA	ssc-miR-30e-3p	mature	known	non-templated	pig	23	430	0	21	2	0	three_non-temp	three_prime	8	0	0	0
CTTTCAGTCGGATGTTTGCAG	miRNA	ssc-miR-30a-3p	mature	known	templated	pig	21	551	0	21	1	0	three_temp	three_prime	2	0	1	0
CTTTCAGTCGGATGTTTGCAGC	miRNA	ssc-miR-30a-3p	mature	known	templated	pig	22	1944	0	22	0	1	mature	mature	1	1	1	0
CTTTCAGTCGGATGTTTGCAGT	miRNA	ssc-miR-30a-3p	mature	known	non-templated	pig	22	425	0	21	1	0	three_non-temp	three_prime	4	0	1	0
CTTTGGTTATCTAGCTGTATG	miRNA	ssc-miR-9	mature	known	templated	pig	21	973	1	21	0	0	five_temp	five_prime	3	0	1	0
CTTTGGTTATCTAGCTGTATGA	miRNA	ssc-miR-9-1	mature	known	templated	pig	22	575	1	22	0	0	five_temp	five_prime	2	0	1	0
CTTTTTGCGGTCTGGGCTTGC	miRNA	ssc-miR-129b	mature	known	templated	pig	21	827	0	21	0	1	mature	mature	1	1	1	0
GAAATGTTTAGGACCACC	miRNA	hsa-miR-203a-3p	mature	novel	non-templated	human	18	1106	-2	17	-3	0	both_non-temp	both	27	0	0	0
GAAATGTTTAGGACCACT	miRNA	hsa-miR-203a-3p	mature	novel	templated	human	18	5162	-2	18	-2	0	both_temp	both	13	0	0	0
GAAATGTTTAGGACCACTA	miRNA	hsa-miR-203a-3p	mature	novel	templated	human	19	600	-2	19	-1	0	both_temp	both	37	0	0	0
GAAATGTTTAGGACCACTAA	miRNA	hsa-miR-203a-3p	mature	novel	non-templated	human	20	1966	-2	19	1	0	both_non-temp	both	23	0	0	0
GAAATGTTTAGGACCACTAC	miRNA	hsa-miR-203a-3p	mature	novel	non-templated	human	20	679	-2	19	1	0	both_non-temp	both	35	0	0	0
GAAATGTTTAGGACCACTAG	miRNA	hsa-miR-203a-3p	mature	novel	templated	human	20	32643	2	20	0	0	five_temp	five_prime	3	0	1	0
GAAATGTTTAGGACCACTAGA	miRNA	hsa-miR-203a-3p	mature	novel	templated	human	21	1388	-2	20	1	0	both_temp	both	24	0	0	0
GAAATGTTTAGGACCACTAGC	miRNA	hsa-miR-203a-3p	mature	novel	non-templated	human	21	1102	-2	20	1	0	both_non-temp	both	28	0	0	0
GAAATGTTTAGGACCACTAGT	miRNA	hsa-miR-203a-3p	mature	novel	non-templated	human	21	4491	-2	20	1	0	both_non-temp	both	14	0	0	0
GAAGTGCTTCCATGTTTTAGA	miRNA	bta-miR-302a	mature	novel	non-templated	cattle	21	392	1	19	3	0	both_non-temp	both	41	0	0	0
GAAGTGCTTCCATGTTTTAGC	miRNA	bta-miR-302a	mature	novel	non-templated	cattle	21	5622	1	19	3	0	both_non-temp	both	12	0	0	0
GAAGTGCTTCCATGTTTTAGG	miRNA	bta-miR-302a	mature	novel	non-templated	cattle	21	573	1	19	3	0	both_non-temp	both	36	0	0	0
GAAGTGCTTCCATGTTTTAGTA	miRNA	bta-miR-302a	mature	novel	non-templated	cattle	22	2102	1	20	2	0	both_non-temp	both	23	0	0	0
GAAGTGCTTCCATGTTTTAGTG	miRNA	bta-miR-302a	mature	novel	non-templated	cattle	22	2965	1	21	1	0	both_non-temp	both	18	0	0	0
GAAGTGCTTCCATGTTTTAGTGA	miRNA	bta-miR-302a	mature	novel	non-templated	cattle	23	12348	1	22	0	0	five_non-temp	five_prime	6	0	0	0
GAAGTGCTTCCATGTTTTAGTGC	miRNA	bta-miR-302a	mature	novel	non-templated	cattle	23	1214	1	21	1	0	both_non-temp	both	26	0	0	0
GAAGTGCTTCCATGTTTTAGTGG	miRNA	bta-miR-302a	mature	novel	non-templated	cattle	23	662	1	21	1	0	both_non-temp	both	35	0	0	0
GAAGTGCTTCCATGTTTTAGTGT	miRNA	bta-miR-302a	mature	novel	non-templated	cattle	23	4441	1	21	1	0	both_non-temp	both	14	0	0	0
GAAGTTCTGTTATACACTCAGGC	miRNA	ssc-miR-148b-5p	mature	known	templated	pig	23	489	0	23	0	1	mature	mature	1	1	1	0
GAATGGATTTTTGGAGCT	miRNA	bta-miR-1246	mature	novel	non-templated	cattle	18	412	1	16	3	0	both_non-temp	both	12	0	0	0
GACGTTGGCTCTGGTGGTGAT	miRNA	ssc-miR-1306-3p	mature	known	templated	pig	21	680	1	20	1	0	both_temp	both	2	0	1	0
GACGTTGGCTCTGGTGGTGATG	miRNA	ssc-miR-1306-3p	mature	known	templated	pig	22	699	1	21	0	0	five_temp	five_prime	1	1	1	0
GAGACCTCTGGGTTCTGAGCT	miRNA	ssc-miR-769-5p	mature	known	templated	pig	21	509	-1	20	1	0	both_temp	both	4	0	1	0
GAGAGATCAGAGGCGCAGAG	miRNA	bta-miR-6529a	mature	novel	templated	cattle	20	1366	0	20	1	0	three_temp	three_prime	4	0	1	0
GAGAGATCAGAGGCGCAGAGC	miRNA	bta-miR-6529a	mature	novel	non-templated	cattle	21	2370	0	20	1	0	three_non-temp	three_prime	2	0	1	0
GAGAGATCAGAGGCGCAGAGT	miRNA	bta-miR-6529a	mature	novel	templated	cattle	21	10755	0	21	0	1	mature	mature	1	1	1	0
GAGATGAAGCACTGTAGCTC	miRNA	ssc-miR-143-3p	mature	known	templated	pig	20	909	1	20	0	0	five_temp	five_prime	3	0	1	0
GAGATGAAGCACTGTAGCTCT	miRNA	ssc-miR-143-3p	mature	known	non-templated	pig	21	407	-1	20	1	0	both_non-temp	both	8	0	0	0
GAGCTCGGTCTGAGGCCCCTCAGT	miRNA	ssc-miR-423-3p	mature	known	non-templated	pig	24	1362	1	23	0	0	five_non-temp	five_prime	23	0	0	0
GAGGGCCCCCCCCAATCCTGT	miRNA	ssc-miR-296-5p	mature	known	templated	pig	21	242	0	21	0	1	mature	mature	1	1	1	0
GAGGGGCAGAGAGCGAGACT	miRNA	ssc-miR-423-5p	mature	known	templated	pig	20	1452	-1	20	-2	0	both_temp	both	10	0	0	0
GAGGGGCAGAGAGCGAGACTT	miRNA	ssc-miR-423-5p	mature	known	templated	pig	21	1881	-1	21	-1	0	both_temp	both	7	0	0	0
GAGGGGCAGAGAGCGAGACTTC	miRNA	ssc-miR-423-5p	mature	known	non-templated	pig	22	1109	-1	21	1	0	both_non-temp	both	11	0	0	0
GAGGGGCAGAGAGCGAGACTTT	miRNA	ssc-miR-423-5p	mature	known	templated	pig	22	6772	1	22	0	0	five_temp	five_prime	4	0	1	0
GAGGGGCAGAGAGCGAGACTTTT	miRNA	ssc-miR-423-5p	mature	known	templated	pig	23	798	-1	22	1	0	both_temp	both	13	0	0	0
GAGGTAGGAGGTTGTATAGTT	miRNA	ssc-let-7e	mature	known	templated	pig	21	538	1	21	0	0	five_temp	five_prime	5	0	1	0
GAGGTAGTAAGTTGTATTGTT	miRNA	ssc-miR-98	mature	known	templated	pig	21	464	1	21	0	0	five_temp	five_prime	4	0	1	0
GAGGTAGTAGATTGTAT	miRNA	ssc-let-7f	mature	known	templated	pig	17	682	-1	17	-4	0	both_temp	both	14	0	0	0
GAGGTAGTAGATTGTATAGC	miRNA	ssc-let-7f	mature	known	non-templated	pig	20	496	-1	19	-2	0	both_non-temp	both	18	0	0	0
GAGGTAGTAGATTGTATAGT	miRNA	ssc-let-7f	mature	known	templated	pig	20	2227	-1	20	-1	0	both_temp	both	8	0	0	0
GAGGTAGTAGATTGTATAGTC	miRNA	ssc-let-7f	mature	known	non-templated	pig	21	1997	-1	20	1	0	both_non-temp	both	9	0	0	0
GAGGTAGTAGATTGTATAGTT	miRNA	ssc-let-7f	mature	known	templated	pig	21	9078	1	21	0	0	five_temp	five_prime	4	0	1	0
GAGGTAGTAGATTGTATAGTTT	miRNA	ssc-let-7f	mature	known	templated	pig	22	598	-1	21	1	0	both_temp	both	15	0	0	0
GAGGTAGTAGGTTGCATAGT	miRNA	ssc-let-7d-5p	mature	known	templated	pig	20	336	-1	20	-1	0	both_temp	both	7	0	0	0
GAGGTAGTAGGTTGCATAGTT	miRNA	ssc-let-7d-5p	mature	known	templated	pig	21	975	1	21	0	0	five_temp	five_prime	4	0	1	0
GAGGTAGTAGGTTGTAT	miRNA	ssc-let-7a	mature	known	templated	pig	17	844	-1	17	-4	0	both_temp	both	20	0	0	0
GAGGTAGTAGGTTGTATAG	miRNA	ssc-let-7a	mature	known	templated	pig	19	620	-1	19	-2	0	both_temp	both	22	0	0	0
GAGGTAGTAGGTTGTATAGC	miRNA	ssc-let-7a	mature	known	non-templated	pig	20	1022	-1	19	-2	0	both_non-temp	both	17	0	0	0
GAGGTAGTAGGTTGTATAGT	miRNA	ssc-let-7a	mature	known	templated	pig	20	4969	-1	20	-1	0	both_temp	both	7	0	0	0
GAGGTAGTAGGTTGTATAGTA	miRNA	ssc-let-7a	mature	known	non-templated	pig	21	370	-1	20	1	0	both_non-temp	both	26	0	0	0
GAGGTAGTAGGTTGTATAGTC	miRNA	ssc-let-7a	mature	known	non-templated	pig	21	3288	-1	20	1	0	both_non-temp	both	9	0	0	0
GAGGTAGTAGGTTGTATAGTG	miRNA	ssc-let-7a	mature	known	non-templated	pig	21	253	-1	20	1	0	both_non-temp	both	27	0	0	0
GAGGTAGTAGGTTGTATAGTT	miRNA	ssc-let-7a	mature	known	templated	pig	21	13892	1	21	0	0	five_temp	five_prime	4	0	1	0
GAGGTAGTAGGTTGTATAGTTA	miRNA	ssc-let-7a	mature	known	non-templated	pig	22	409	-1	21	1	0	both_non-temp	both	25	0	0	0
GAGGTAGTAGGTTGTATAGTTT	miRNA	ssc-let-7a	mature	known	templated	pig	22	1063	-1	21	1	0	both_temp	both	14	0	0	0
GAGGTAGTAGGTTGTATGGTT	miRNA	ssc-let-7c	mature	known	templated	pig	21	1375	1	21	0	0	five_temp	five_prime	3	0	1	0
GAGGTAGTAGGTTGTGTGG	miRNA	bta-let-7b	mature	novel	templated	cattle	19	258	-1	19	-2	0	both_temp	both	23	0	0	0
GAGGTAGTAGGTTGTGTGGT	miRNA	bta-let-7b	mature	novel	templated	cattle	20	981	-1	20	-1	0	both_temp	both	13	0	0	0
GAGGTAGTAGGTTGTGTGGTC	miRNA	bta-let-7b	mature	novel	non-templated	cattle	21	841	-1	20	1	0	both_non-temp	both	15	0	0	0
GAGGTAGTAGGTTGTGTGGTT	miRNA	bta-let-7b	mature	novel	templated	cattle	21	3945	1	21	0	0	five_temp	five_prime	5	0	1	0
GAGGTAGTAGGTTGTGTGGTTA	miRNA	bta-let-7b	mature	novel	non-templated	cattle	22	340	-1	21	1	0	both_non-temp	both	20	0	0	0
GAGGTAGTAGGTTGTGTGGTTC	miRNA	bta-let-7b	mature	novel	non-templated	cattle	22	321	-1	21	1	0	both_non-temp	both	21	0	0	0
GAGGTAGTAGGTTGTGTGGTTT	miRNA	bta-let-7b	mature	novel	templated	cattle	22	1649	-1	21	1	0	both_temp	both	8	0	0	0
GAGGTAGTAGTTTGTAC	miRNA	ssc-let-7g	mature	known	templated	pig	17	369	-1	17	-4	0	both_temp	both	19	0	0	0
GAGGTAGTAGTTTGTACAG	miRNA	ssc-let-7g	mature	known	templated	pig	19	411	-1	19	-2	0	both_temp	both	17	0	0	0
GAGGTAGTAGTTTGTACAGC	miRNA	ssc-let-7g	mature	known	non-templated	pig	20	458	-1	19	-2	0	both_non-temp	both	16	0	0	0
GAGGTAGTAGTTTGTACAGT	miRNA	ssc-let-7g	mature	known	templated	pig	20	2183	-1	20	-1	0	both_temp	both	8	0	0	0
GAGGTAGTAGTTTGTACAGTC	miRNA	ssc-let-7g	mature	known	non-templated	pig	21	1207	-1	20	1	0	both_non-temp	both	11	0	0	0
GAGGTAGTAGTTTGTACAGTT	miRNA	ssc-let-7g	mature	known	templated	pig	21	5692	1	21	0	0	five_temp	five_prime	4	0	1	0
GAGGTAGTAGTTTGTACAGTTA	miRNA	ssc-let-7g	mature	known	non-templated	pig	22	291	-1	21	1	0	both_non-temp	both	20	0	0	0
GAGGTAGTAGTTTGTACAGTTT	miRNA	ssc-let-7g	mature	known	templated	pig	22	461	-1	21	1	0	both_temp	both	15	0	0	0
GAGGTAGTAGTTTGTGCTG	miRNA	ssc-let-7i	mature	known	templated	pig	19	353	-1	18	1	0	both_temp	both	20	0	0	0
GAGGTAGTAGTTTGTGCTGC	miRNA	bta-let-7i	mature	novel	non-templated	cattle	20	569	-1	19	-2	0	both_non-temp	both	8	0	0	0
GAGGTAGTAGTTTGTGCTGT	miRNA	bta-let-7i	mature	novel	templated	cattle	20	2374	-1	20	-1	0	both_temp	both	5	0	1	0
GAGGTAGTAGTTTGTGCTGTA	miRNA	bta-let-7i	mature	novel	non-templated	cattle	21	742	-1	20	1	0	both_non-temp	both	6	0	0	0
GAGGTAGTAGTTTGTGCTGTC	miRNA	bta-let-7i	mature	novel	non-templated	cattle	21	5904	-1	20	1	0	both_non-temp	both	2	0	1	0
GAGGTAGTAGTTTGTGCTGTG	miRNA	bta-let-7i	mature	novel	non-templated	cattle	21	612	-1	20	1	0	both_non-temp	both	7	0	0	0
GAGGTAGTAGTTTGTGCTGTT	miRNA	bta-let-7i	mature	novel	templated	cattle	21	26189	1	21	0	0	five_temp	five_prime	1	1	1	0
GAGGTAGTAGTTTGTGCTGTTA	miRNA	bta-let-7i	mature	novel	non-templated	cattle	22	3064	-1	21	1	0	both_non-temp	both	3	0	1	0
GAGGTAGTAGTTTGTGCTGTTC	miRNA	bta-let-7i	mature	novel	non-templated	cattle	22	564	-1	21	1	0	both_non-temp	both	9	0	0	0
GAGGTAGTAGTTTGTGCTGTTT	miRNA	bta-let-7i	mature	novel	non-templated	cattle	22	3028	-1	21	1	0	both_non-temp	both	4	0	1	0
GAGTGGTTTTACCCTATGGTAG	miRNA	ssc-miR-140-5p	mature	known	non-templated	pig	22	402	1	21	0	0	five_non-temp	five_prime	6	0	0	0
GATCTCGGAAGCTAAGC	miRNA	hsa-miR-7641	mature	novel	templated	human	17	965	2	17	0	0	five_temp	five_prime	1	1	1	0
GATGACACGATCACTCCCGTTGAGT	miRNA	bta-miR-425-5p	mature	novel	non-templated	cattle	25	476	1	22	2	0	both_non-temp	both	4	0	1	0
GATGCGGAACCTGCGGATACGG	miRNA	ssc-miR-7134-3p	mature	known	templated	pig	22	2616	1	21	0	0	five_temp	five_prime	5	0	1	0
GCAAAGCACACGGCCTGCAGAGA	miRNA	bta-miR-330	mature	novel	templated	cattle	23	3787	0	23	0	1	mature	mature	1	1	1	0
GCAAAGCACACGGCCTGCAGAGAG	miRNA	bta-miR-330	mature	novel	templated	cattle	24	628	0	23	1	0	three_temp	three_prime	8	0	0	0
GCAAAGCACACGGCCTGCAGAGAGA	miRNA	bta-miR-330	mature	novel	non-templated	cattle	25	752	0	23	2	0	three_non-temp	three_prime	7	0	0	0
GCAAAGCACACGGCCTGCAGAGAGC	miRNA	bta-miR-330	mature	novel	non-templated	cattle	25	783	0	23	2	0	three_non-temp	three_prime	6	0	0	0
GCAAAGCACACGGCCTGCAGAGAGG	miRNA	bta-miR-330	mature	novel	templated	cattle	25	830	0	23	2	0	three_temp	three_prime	4	0	1	0
GCAAAGCACACGGCCTGCAGAGAGT	miRNA	bta-miR-330	mature	novel	non-templated	cattle	25	2500	0	23	2	0	three_non-temp	three_prime	2	0	1	0
GCACTACAGAACTTTGT	miRNA	ssc-miR-148a-3p	mature	known	templated	pig	17	1299	5	17	0	0	five_temp	five_prime	8	0	0	0
GCACTTGTCCCGGCCTGC	miRNA	ssc-miR-92a	mature	known	non-templated	pig	18	675	-4	17	1	0	both_non-temp	both	33	0	0	0
GCACTTGTCCCGGCCTGT	miRNA	ssc-miR-92a	mature	known	templated	pig	18	2937	4	18	0	0	five_temp	five_prime	15	0	0	0
GCAGCATTGTACAGGGCTATCA	miRNA	ssc-miR-107	mature	known	templated	pig	22	255	1	22	0	0	five_temp	five_prime	6	0	0	0
GCAGCATTGTACAGGGCTATG	miRNA	ssc-miR-103	mature	known	templated	pig	21	2438	-1	21	-1	0	both_temp	both	4	0	1	0
GCAGCATTGTACAGGGCTATGA	miRNA	ssc-miR-103	mature	known	templated	pig	22	4003	1	22	0	0	five_temp	five_prime	3	0	1	0
GCGGGGCTAGGGCTAACAGC	miRNA	ssc-miR-744	mature	known	templated	pig	20	1749	-1	20	-1	0	both_temp	both	4	0	1	0
GCGGGGCTAGGGCTAACAGCA	miRNA	ssc-miR-744	mature	known	templated	pig	21	2477	1	21	0	0	five_temp	five_prime	3	0	1	0
GCTACATCTGGCTACTGGGTCTC	miRNA	ssc-miR-222	mature	known	templated	pig	23	962	1	23	0	0	five_temp	five_prime	3	0	1	0
GCTACATTGTCTGCTGGGTTTC	miRNA	ssc-miR-221-3p	mature	known	templated	pig	22	313	-1	21	1	0	both_temp	both	5	0	1	0
GCTCGGTCTGAGGCCCCTC	miRNA	ssc-miR-423-3p	mature	known	templated	pig	19	4374	-1	19	-3	0	both_temp	both	11	0	0	0
GCTCGGTCTGAGGCCCCTCA	miRNA	ssc-miR-423-3p	mature	known	templated	pig	20	524	-1	20	-2	0	both_temp	both	35	0	0	0
GCTCGGTCTGAGGCCCCTCAG	miRNA	ssc-miR-423-3p	mature	known	templated	pig	21	2378	-1	21	-1	0	both_temp	both	17	0	0	0
GCTCGGTCTGAGGCCCCTCAGA	miRNA	ssc-miR-423-3p	mature	known	non-templated	pig	22	839	-1	21	1	0	both_non-temp	both	25	0	0	0
GCTCGGTCTGAGGCCCCTCAGC	miRNA	ssc-miR-423-3p	mature	known	non-templated	pig	22	5491	-1	21	1	0	both_non-temp	both	8	0	0	0
GCTCGGTCTGAGGCCCCTCAGG	miRNA	ssc-miR-423-3p	mature	known	non-templated	pig	22	565	-1	21	1	0	both_non-temp	both	30	0	0	0
GCTCGGTCTGAGGCCCCTCAGT	miRNA	ssc-miR-423-3p	mature	known	templated	pig	22	26624	1	22	0	0	five_temp	five_prime	3	0	1	0
GCTCGGTCTGAGGCCCCTCAGTA	miRNA	ssc-miR-423-3p	mature	known	non-templated	pig	23	1779	-1	22	1	0	both_non-temp	both	20	0	0	0
GCTCGGTCTGAGGCCCCTCAGTT	miRNA	ssc-miR-423-3p	mature	known	non-templated	pig	23	454	-1	22	1	0	both_non-temp	both	38	0	0	0
GCTCGGTCTGAGGCCCCTT	miRNA	ssc-miR-423-3p	mature	known	non-templated	pig	19	517	-1	18	-4	0	both_non-temp	both	36	0	0	0
GCTCTGACTTTATTGCACTACT	miRNA	hsa-miR-301a-5p	mature	novel	templated	human	22	1578	0	22	0	1	mature	mature	1	1	1	0
GCTGGACTTGGAGTCAGAAGG	miRNA	bta-miR-378d	mature	novel	non-templated	cattle	21	10249	1	19	3	0	both_non-temp	both	3	0	1	0
GCTTATCAGACTGATGTTGAC	miRNA	ssc-miR-21	mature	known	templated	pig	21	1042	-2	20	1	0	both_temp	both	48	0	0	0
GCTTCCATGTTTTAGTAG	miRNA	bta-miR-302b	mature	novel	templated	cattle	18	1907	5	18	0	0	five_temp	five_prime	17	0	0	0
GGAAGACTAGTGATTTTGTT	miRNA	ssc-miR-7	mature	known	templated	pig	20	1291	-1	20	-3	0	both_temp	both	29	0	0	0
GGAAGACTAGTGATTTTGTTG	miRNA	ssc-miR-7	mature	known	templated	pig	21	5341	-1	21	-2	0	both_temp	both	14	0	0	0
GGAAGACTAGTGATTTTGTTGC	miRNA	ssc-miR-7	mature	known	non-templated	pig	22	2088	-1	21	-2	0	both_non-temp	both	22	0	0	0
GGAAGACTAGTGATTTTGTTGT	miRNA	ssc-miR-7	mature	known	templated	pig	22	9279	-1	22	-1	0	both_temp	both	11	0	0	0
GGAAGACTAGTGATTTTGTTGTA	miRNA	ssc-miR-7	mature	known	non-templated	pig	23	2429	-1	22	1	0	both_non-temp	both	19	0	0	0
GGAAGACTAGTGATTTTGTTGTAAA	miRNA	ssc-miR-7	mature	known	non-templated	pig	25	656	-1	22	3	0	both_non-temp	both	40	0	0	0
GGAAGACTAGTGATTTTGTTGTC	miRNA	ssc-miR-7	mature	known	non-templated	pig	23	27240	-1	22	1	0	both_non-temp	both	6	0	0	0
GGAAGACTAGTGATTTTGTTGTG	miRNA	ssc-miR-7	mature	known	non-templated	pig	23	2199	-1	22	1	0	both_non-temp	both	21	0	0	0
GGAAGACTAGTGATTTTGTTGTT	miRNA	ssc-miR-7	mature	known	templated	pig	23	126107	1	23	0	0	five_temp	five_prime	3	0	1	0
GGAAGACTAGTGATTTTGTTGTTA	miRNA	ssc-miR-7	mature	known	non-templated	pig	24	2929	-1	23	1	0	both_non-temp	both	18	0	0	0
GGAAGACTAGTGATTTTGTTGTTT	miRNA	ssc-miR-7	mature	known	templated	pig	24	795	-1	23	1	0	both_temp	both	38	0	0	0
GGAATGTAAAGAAGTATGTAC	miRNA	ssc-miR-1	mature	known	non-templated	pig	21	407	-1	20	1	0	both_non-temp	both	3	0	1	0
GGAATGTAAAGAAGTATGTAT	miRNA	bta-miR-1	mature	novel	templated	cattle	21	442	1	21	0	0	five_temp	five_prime	1	1	1	0
GGACGGAGAACTGATAAGGGT	miRNA	ssc-miR-184	mature	known	templated	pig	21	456	1	21	0	0	five_temp	five_prime	3	0	1	0
GGAGAGAAAGGCAGTTCCTG	miRNA	ssc-miR-185	mature	known	templated	pig	20	454	-1	20	-1	0	both_temp	both	7	0	0	0
GGAGAGAAAGGCAGTTCCTGA	miRNA	ssc-miR-185	mature	known	templated	pig	21	3450	1	21	0	0	five_temp	five_prime	2	0	1	0
GGAGTGTGACAATGGTGTT	miRNA	ssc-miR-122	mature	known	templated	pig	19	744	-1	19	-3	0	both_temp	both	14	0	0	0
GGAGTGTGACAATGGTGTTT	miRNA	ssc-miR-122	mature	known	templated	pig	20	1815	-1	20	-2	0	both_temp	both	9	0	0	0
GGAGTGTGACAATGGTGTTTA	miRNA	ssc-miR-122	mature	known	non-templated	pig	21	663	-1	20	-2	0	both_non-temp	both	15	0	0	0
GGAGTGTGACAATGGTGTTTG	miRNA	ssc-miR-122	mature	known	templated	pig	21	17202	-1	21	-1	0	both_temp	both	2	0	1	0
GGAGTGTGACAATGGTGTTTGA	miRNA	ssc-miR-122	mature	known	non-templated	pig	22	1132	-1	21	1	0	both_non-temp	both	12	0	0	0
GGAGTGTGACAATGGTGTTTGT	miRNA	ssc-miR-122	mature	known	templated	pig	22	1369	1	22	0	0	five_temp	five_prime	11	0	0	0
GGATTGTTCTCCAACCTGGCTCT	miRNA	ssc-miR-7857-3p	mature	known	templated	pig	23	507	2	21	1	0	both_temp	both	15	0	0	0
GGCAGTGTAGTTAGCTGAT	miRNA	ssc-miR-34c	mature	known	templated	pig	19	521	-1	19	-3	0	both_temp	both	21	0	0	0
GGCAGTGTAGTTAGCTGATC	miRNA	ssc-miR-34c	mature	known	non-templated	pig	20	681	-1	19	-3	0	both_non-temp	both	16	0	0	0
GGCAGTGTAGTTAGCTGATT	miRNA	ssc-miR-34c	mature	known	templated	pig	20	4206	-1	20	-2	0	both_temp	both	6	0	0	0
GGCAGTGTAGTTAGCTGATTG	miRNA	ssc-miR-34c	mature	known	templated	pig	21	3659	-1	21	-1	0	both_temp	both	8	0	0	0
GGCAGTGTAGTTAGCTGATTGA	miRNA	ssc-miR-34c	mature	known	non-templated	pig	22	596	-1	21	1	0	both_non-temp	both	17	0	0	0
GGCAGTGTAGTTAGCTGATTGC	miRNA	ssc-miR-34c	mature	known	templated	pig	22	7670	1	22	0	0	five_temp	five_prime	5	0	1	0
GGCAGTGTAGTTAGCTGATTGCA	miRNA	ssc-miR-34c	mature	known	non-templated	pig	23	260	-1	22	1	0	both_non-temp	both	23	0	0	0
GGCAGTGTAGTTAGCTGATTGT	miRNA	ssc-miR-34c	mature	known	non-templated	pig	22	2583	-1	21	1	0	both_non-temp	both	11	0	0	0
GGCAGTGTATTGTTAGCTGGT	miRNA	bta-miR-449a	mature	novel	templated	cattle	21	1056	1	21	0	0	five_temp	five_prime	5	0	1	0
GGCCCTGACTGAAGACCTGCAGTT	miRNA	bta-miR-1291	mature	novel	templated	cattle	24	622	-1	23	1	0	both_temp	both	5	0	1	0
GGCTCAGTTCAGCAGGAAC	miRNA	ssc-miR-24-3p	mature	known	templated	pig	19	1294	-1	19	-2	0	both_temp	both	5	0	1	0
GGCTCAGTTCAGCAGGAACA	miRNA	ssc-miR-24-3p	mature	known	templated	pig	20	468	-1	20	-1	0	both_temp	both	11	0	0	0
GGCTCAGTTCAGCAGGAACAG	miRNA	ssc-miR-24-3p	mature	known	templated	pig	21	1031	1	21	0	0	five_temp	five_prime	6	0	0	0
GGCTCAGTTCAGCAGGAACAGT	miRNA	ssc-miR-24-3p	mature	known	non-templated	pig	22	588	-1	21	1	0	both_non-temp	both	10	0	0	0
GGGAGCCAGGAAGTATTGATGTT	miRNA	hsa-miR-505-5p	mature	novel	templated	human	23	521	0	22	1	0	three_temp	three_prime	1	1	1	0
GGGTCTTTGCGGGCGAGATG	miRNA	ssc-miR-193a-5p	mature	known	templated	pig	20	594	-1	20	-1	0	both_temp	both	4	0	1	0
GGGTCTTTGCGGGCGAGATGA	miRNA	ssc-miR-193a-5p	mature	known	templated	pig	21	1483	1	21	0	0	five_temp	five_prime	3	0	1	0
GGGTTGGGCGGAGGCTTTCC	miRNA	ssc-miR-296-3p	mature	known	templated	pig	20	2145	1	20	0	0	five_temp	five_prime	5	0	1	0
GGGTTGGGCGGAGGCTTTCCC	miRNA	ssc-miR-296-3p	mature	known	non-templated	pig	21	557	-1	20	1	0	both_non-temp	both	9	0	0	0
GGGTTGGGCGGAGGCTTTCCT	miRNA	ssc-miR-296-3p	mature	known	templated	pig	21	2228	-1	20	1	0	both_temp	both	4	0	1	0
GGGTTGGGCGGAGGCTTTCT	miRNA	ssc-miR-296-3p	mature	known	non-templated	pig	20	410	-1	19	1	0	both_non-temp	both	12	0	0	0
GGTTGGGATCGGTTGCAATGCC	miRNA	hsa-miR-92a-1-5p	mature	novel	non-templated	human	22	503	-1	21	1	0	both_non-temp	both	5	0	1	0
GGTTGGGATCGGTTGCAATGCT	miRNA	hsa-miR-92a-1-5p	mature	novel	templated	human	22	2069	1	22	0	0	five_temp	five_prime	2	0	1	0
GTAAACATCCCCGACTGGA	miRNA	ssc-miR-30d	mature	known	templated	pig	19	2404	-1	19	-4	0	both_temp	both	20	0	0	0
GTAAACATCCCCGACTGGAA	miRNA	ssc-miR-30d	mature	known	templated	pig	20	765	-1	20	-3	0	both_temp	both	26	0	0	0
GTAAACATCCCCGACTGGAAA	miRNA	ssc-miR-30d	mature	known	non-templated	pig	21	677	-1	20	-3	0	both_non-temp	both	27	0	0	0
GTAAACATCCCCGACTGGAAG	miRNA	ssc-miR-30d	mature	known	templated	pig	21	3717	-1	21	-2	0	both_temp	both	16	0	0	0
GTAAACATCCCCGACTGGAAGA	miRNA	ssc-miR-30d	mature	known	non-templated	pig	22	667	-1	21	-2	0	both_non-temp	both	28	0	0	0
GTAAACATCCCCGACTGGAAGC	miRNA	ssc-miR-30d	mature	known	templated	pig	22	26097	-1	22	-1	0	both_temp	both	6	0	0	0
GTAAACATCCCCGACTGGAAGCA	miRNA	ssc-miR-30d	mature	known	non-templated	pig	23	4604	-1	22	1	0	both_non-temp	both	14	0	0	0
GTAAACATCCCCGACTGGAAGCC	miRNA	ssc-miR-30d	mature	known	non-templated	pig	23	21213	-1	22	1	0	both_non-temp	both	8	0	0	0
GTAAACATCCCCGACTGGAAGCG	miRNA	ssc-miR-30d	mature	known	non-templated	pig	23	2814	-1	22	1	0	both_non-temp	both	19	0	0	0
GTAAACATCCCCGACTGGAAGCT	miRNA	ssc-miR-30d	mature	known	templated	pig	23	87093	1	23	0	0	five_temp	five_prime	4	0	1	0
GTAAACATCCCCGACTGGAAGCTT	miRNA	ssc-miR-30d	mature	known	non-templated	pig	24	929	-1	23	1	0	both_non-temp	both	25	0	0	0
GTAAACATCCCCGACTGGAAGT	miRNA	ssc-miR-30d	mature	known	non-templated	pig	22	6155	-1	21	-2	0	both_non-temp	both	12	0	0	0
GTAAACATCCTACACTCAGCT	miRNA	ssc-miR-30b-5p	mature	known	templated	pig	21	606	1	21	0	0	five_temp	five_prime	3	0	1	0
GTAAACATCCTACACTCTC	miRNA	ssc-miR-30c-5p	mature	known	templated	pig	19	321	-1	19	-3	0	both_temp	both	15	0	0	0
GTAAACATCCTACACTCTCAGC	miRNA	ssc-miR-30c-5p	mature	known	templated	pig	22	3266	1	22	0	0	five_temp	five_prime	6	0	0	0
GTAAACATCCTACACTCTCAGCA	miRNA	ssc-miR-30c-5p	mature	known	non-templated	pig	23	261	-1	22	1	0	both_non-temp	both	17	0	0	0
GTAAACATCCTACACTCTCAGCC	miRNA	ssc-miR-30c-5p	mature	known	non-templated	pig	23	1095	-1	22	1	0	both_non-temp	both	10	0	0	0
GTAAACATCCTACACTCTCAGCT	miRNA	ssc-miR-30c-5p	mature	known	templated	pig	23	4689	-1	22	1	0	both_temp	both	4	0	1	0
GTAAACATCCTACACTCTCAGT	miRNA	ssc-miR-30c-5p	mature	known	non-templated	pig	22	716	-1	21	1	0	both_non-temp	both	11	0	0	0
GTAAACATCCTCGACTGGA	miRNA	ssc-miR-30a-5p	mature	known	templated	pig	19	864	-1	19	-2	0	both_temp	both	15	0	0	0
GTAAACATCCTCGACTGGAA	miRNA	ssc-miR-30a-5p	mature	known	templated	pig	20	534	-1	20	-1	0	both_temp	both	18	0	0	0
GTAAACATCCTCGACTGGAAA	miRNA	ssc-miR-30a-5p	mature	known	non-templated	pig	21	272	-1	20	1	0	both_non-temp	both	21	0	0	0
GTAAACATCCTCGACTGGAAG	miRNA	ssc-miR-30a-5p	mature	known	templated	pig	21	2357	1	21	0	0	five_temp	five_prime	9	0	0	0
GTAAACATCCTCGACTGGAAGCA	miRNA	bta-miR-30a-5p	mature	novel	non-templated	cattle	23	967	-1	22	1	0	both_non-temp	both	3	0	1	0
GTAAACATCCTCGACTGGAAGCC	miRNA	bta-miR-30a-5p	mature	novel	non-templated	cattle	23	3484	-1	22	1	0	both_non-temp	both	2	0	1	0
GTAAACATCCTCGACTGGAAGCG	miRNA	bta-miR-30a-5p	mature	novel	non-templated	cattle	23	446	-1	22	1	0	both_non-temp	both	5	0	1	0
GTAAACATCCTCGACTGGAAGCT	miRNA	bta-miR-30a-5p	mature	novel	templated	cattle	23	14245	1	23	0	0	five_temp	five_prime	1	1	1	0
GTAAACATCCTCGACTGGAAGT	miRNA	ssc-miR-30a-5p	mature	known	non-templated	pig	22	1522	-1	21	1	0	both_non-temp	both	11	0	0	0
GTAAACATCCTTGACTGGAAG	miRNA	ssc-miR-30e-5p	mature	known	templated	pig	21	383	-1	21	-2	0	both_temp	both	22	0	0	0
GTAAACATCCTTGACTGGAAGC	miRNA	ssc-miR-30e-5p	mature	known	templated	pig	22	1187	-1	22	-1	0	both_temp	both	16	0	0	0
GTAAACATCCTTGACTGGAAGCA	miRNA	ssc-miR-30e-5p	mature	known	non-templated	pig	23	1930	-1	22	1	0	both_non-temp	both	10	0	0	0
GTAAACATCCTTGACTGGAAGCC	miRNA	ssc-miR-30e-5p	mature	known	non-templated	pig	23	9125	-1	22	1	0	both_non-temp	both	4	0	1	0
GTAAACATCCTTGACTGGAAGCG	miRNA	ssc-miR-30e-5p	mature	known	non-templated	pig	23	1090	-1	22	1	0	both_non-temp	both	17	0	0	0
GTAAACATCCTTGACTGGAAGCT	miRNA	ssc-miR-30e-5p	mature	known	templated	pig	23	38535	1	23	0	0	five_temp	five_prime	2	0	1	0
GTAAACATCCTTGACTGGAAGCTG	miRNA	ssc-miR-30e-5p	mature	known	templated	pig	24	1619	-1	23	1	0	both_temp	both	12	0	0	0
GTAAACATCCTTGACTGGAAGCTT	miRNA	ssc-miR-30e-5p	mature	known	non-templated	pig	24	487	-1	23	1	0	both_non-temp	both	19	0	0	0
GTACAGTACTGTGATAACTGA	miRNA	ssc-miR-101	mature	known	templated	pig	21	2463	1	20	1	0	both_temp	both	6	0	0	0
GTACAGTACTGTGATAACTGAA	miRNA	ssc-miR-101	mature	known	templated	pig	22	15329	1	21	0	0	five_temp	five_prime	1	1	1	0
GTACAGTACTGTGATAACTGAAA	miRNA	ssc-miR-101	mature	known	non-templated	pig	23	1634	1	21	1	0	both_non-temp	both	9	0	0	0
GTACAGTACTGTGATAACTGAC	miRNA	ssc-miR-101	mature	known	non-templated	pig	22	597	1	20	1	0	both_non-temp	both	16	0	0	0
GTACAGTACTGTGATAACTGAT	miRNA	ssc-miR-101	mature	known	non-templated	pig	22	1428	1	20	1	0	both_non-temp	both	10	0	0	0
GTACTCAAACTGTGGGGGCACT	miRNA	hsa-miR-371a-5p	mature	novel	templated	human	22	421	2	20	0	0	five_temp	five_prime	25	0	0	0
GTAGCTTATCAGACTGATGTTG	miRNA	ssc-miR-21	mature	known	templated	pig	22	325	1	21	1	0	both_temp	both	67	0	0	0
GTAGCTTATCAGACTGATGTTGA	miRNA	ssc-miR-21	mature	known	templated	pig	23	579	1	22	0	0	five_temp	five_prime	58	0	0	0
GTAGCTTATCAGACTGATGTTGAC	miRNA	ssc-miR-21	mature	known	templated	pig	24	1098	1	22	1	0	both_temp	both	46	0	0	0
GTCAACACTTGCTGGTTTCCTCT	miRNA	ssc-miR-505	mature	known	templated	pig	23	825	1	22	0	0	five_temp	five_prime	1	1	1	0
GTGAAATGTTTAGGACC	miRNA	hsa-miR-203a-3p	mature	novel	templated	human	17	1028	0	17	5	0	three_temp	three_prime	30	0	0	0
GTGAAATGTTTAGGACCAC	miRNA	hsa-miR-203a-3p	mature	novel	templated	human	19	276	0	19	3	0	three_temp	three_prime	44	0	0	0
GTGAAATGTTTAGGACCACA	miRNA	hsa-miR-203a-3p	mature	novel	non-templated	human	20	564	0	19	3	0	three_non-temp	three_prime	38	0	0	0
GTGAAATGTTTAGGACCACC	miRNA	hsa-miR-203a-3p	mature	novel	non-templated	human	20	3426	0	19	3	0	three_non-temp	three_prime	18	0	0	0
GTGAAATGTTTAGGACCACG	miRNA	hsa-miR-203a-3p	mature	novel	non-templated	human	20	395	0	19	3	0	three_non-temp	three_prime	42	0	0	0
GTGAAATGTTTAGGACCACT	miRNA	hsa-miR-203a-3p	mature	novel	templated	human	20	16308	0	20	2	0	three_temp	three_prime	6	0	0	0
GTGAAATGTTTAGGACCACTA	miRNA	hsa-miR-203a-3p	mature	novel	templated	human	21	3171	0	21	1	0	three_temp	three_prime	19	0	0	0
GTGAAATGTTTAGGACCACTAA	miRNA	hsa-miR-203a-3p	mature	novel	non-templated	human	22	6314	0	21	1	0	three_non-temp	three_prime	11	0	0	0
GTGAAATGTTTAGGACCACTAC	miRNA	hsa-miR-203a-3p	mature	novel	non-templated	human	22	2433	0	21	1	0	three_non-temp	three_prime	21	0	0	0
GTGAAATGTTTAGGACCACTAG	miRNA	hsa-miR-203a-3p	mature	novel	templated	human	22	108200	0	22	0	1	mature	mature	2	0	1	0
GTGAAATGTTTAGGACCACTAGA	miRNA	hsa-miR-203a-3p	mature	novel	templated	human	23	9649	0	22	1	0	three_temp	three_prime	8	0	0	0
GTGAAATGTTTAGGACCACTAGC	miRNA	hsa-miR-203a-3p	mature	novel	non-templated	human	23	882	0	22	1	0	three_non-temp	three_prime	32	0	0	0
GTGAAATGTTTAGGACCACTAGG	miRNA	hsa-miR-203a-3p	mature	novel	non-templated	human	23	375	0	22	1	0	three_non-temp	three_prime	43	0	0	0
GTGAAATGTTTAGGACCACTAGT	miRNA	hsa-miR-203a-3p	mature	novel	non-templated	human	23	3609	0	22	1	0	three_non-temp	three_prime	17	0	0	0
GTGAAATGTTTAGGACCACTAT	miRNA	hsa-miR-203a-3p	mature	novel	non-templated	human	22	959	0	21	1	0	three_non-temp	three_prime	31	0	0	0
GTGATACTGTAAACGCTTTCTGATG	miRNA	hsa-miR-3607-3p	mature	novel	non-templated	human	25	866	5	20	0	0	five_non-temp	five_prime	4	0	1	0
GTGATACTGTAAACGCTTTCTGATGTA	miRNA	hsa-miR-3607-3p	mature	novel	non-templated	human	27	971	5	20	2	0	both_non-temp	both	3	0	1	0
GTGCAAATCCATGCAAAACTG	miRNA	ssc-miR-19b	mature	known	templated	pig	21	446	-1	21	-1	0	both_temp	both	3	0	1	0
GTGCAAATCCATGCAAAACTGA	miRNA	ssc-miR-19b	mature	known	templated	pig	22	340	1	22	0	0	five_temp	five_prime	4	0	1	0
GTGTAGTTAGCTGATTGC	miRNA	ssc-miR-34c	mature	known	templated	pig	18	538	5	18	0	0	five_temp	five_prime	20	0	0	0
GTTGGGATCGGTTGCAATGCT	miRNA	hsa-miR-92a-1-5p	mature	novel	templated	human	21	440	2	21	0	0	five_temp	five_prime	6	0	0	0
GTTTTTCATTATTGCTCCTGACC	miRNA	hsa-miR-335-3p	mature	novel	templated	human	23	419	1	22	0	0	five_temp	five_prime	5	0	1	0
TAAACATCCTCGACTGGAAGCT	miRNA	bta-miR-30a-5p	mature	novel	templated	cattle	22	467	2	22	0	0	five_temp	five_prime	4	0	1	0
TAAACATCCTTGACTGGAAGCC	miRNA	ssc-miR-30e-5p	mature	known	non-templated	pig	22	448	-2	21	1	0	both_non-temp	both	20	0	0	0
TAAACATCCTTGACTGGAAGCT	miRNA	ssc-miR-30e-5p	mature	known	templated	pig	22	1977	2	22	0	0	five_temp	five_prime	9	0	0	0
TAAACGTGGATGTACTTGC	miRNA	hsa-miR-302a-5p	mature	novel	templated	human	19	1612	-3	19	-1	0	both_temp	both	24	0	0	0
TAAACGTGGATGTACTTGCA	miRNA	hsa-miR-302a-5p	mature	novel	non-templated	human	20	481	-3	19	1	0	both_non-temp	both	39	0	0	0
TAAACGTGGATGTACTTGCC	miRNA	hsa-miR-302a-5p	mature	novel	non-templated	human	20	2420	-3	19	1	0	both_non-temp	both	18	0	0	0
TAAACGTGGATGTACTTGCCTT	miRNA	hsa-miR-302a-5p	mature	novel	non-templated	human	22	1093	-3	19	3	0	both_non-temp	both	31	0	0	0
TAAACGTGGATGTACTTGCT	miRNA	hsa-miR-302a-5p	mature	novel	templated	human	20	10380	3	20	0	0	five_temp	five_prime	11	0	0	0
TAAACGTGGATGTACTTGCTA	miRNA	hsa-miR-302a-5p	mature	novel	non-templated	human	21	1294	-3	20	1	0	both_non-temp	both	29	0	0	0
TAAACGTGGATGTACTTGCTC	miRNA	hsa-miR-302a-5p	mature	novel	non-templated	human	21	11496	-3	20	1	0	both_non-temp	both	9	0	0	0
TAAACGTGGATGTACTTGCTG	miRNA	hsa-miR-302a-5p	mature	novel	non-templated	human	21	1093	-3	20	1	0	both_non-temp	both	32	0	0	0
TAAACGTGGATGTACTTGCTT	miRNA	hsa-miR-302a-5p	mature	novel	templated	human	21	64442	-3	20	1	0	both_temp	both	1	1	1	0
TAAAGTGCTGACAGTGCAGAT	miRNA	bta-miR-106b	mature	novel	templated	cattle	21	497	0	21	0	1	mature	mature	2	0	1	0
TAAAGTGCTGACAGTGCAGATA	miRNA	bta-miR-106b	mature	novel	templated	cattle	22	2183	0	21	1	0	three_temp	three_prime	1	1	1	0
TAAAGTGCTTATAGTGCAGGC	miRNA	ssc-miR-20a	mature	known	non-templated	pig	21	521	0	20	2	0	three_non-temp	three_prime	9	0	0	0
TAAAGTGCTTATAGTGCAGGT	miRNA	ssc-miR-20a	mature	known	templated	pig	21	2252	0	21	1	0	three_temp	three_prime	5	0	1	0
TAAAGTGCTTATAGTGCAGGTA	miRNA	ssc-miR-20a	mature	known	templated	pig	22	568	0	22	0	1	mature	mature	8	0	0	0
TAAAGTGCTTATAGTGCAGGTAA	miRNA	ssc-miR-20a	mature	known	non-templated	pig	23	5340	0	22	1	0	three_non-temp	three_prime	4	0	1	0
TAAAGTGCTTATAGTGCAGGTAC	miRNA	ssc-miR-20a	mature	known	non-templated	pig	23	796	0	22	1	0	three_non-temp	three_prime	7	0	0	0
TAAAGTGCTTATAGTGCAGGTAG	miRNA	ssc-miR-20a	mature	known	templated	pig	23	103714	0	22	1	0	three_temp	three_prime	1	1	1	0
TAAAGTGCTTATAGTGCAGGTAGA	miRNA	ssc-miR-20a	mature	known	non-templated	pig	24	9226	0	22	2	0	three_non-temp	three_prime	3	0	1	0
TAAAGTGCTTATAGTGCAGGTAGG	miRNA	ssc-miR-20a	mature	known	non-templated	pig	24	479	0	22	2	0	three_non-temp	three_prime	11	0	0	0
TAAAGTGCTTATAGTGCAGGTAGT	miRNA	ssc-miR-20a	mature	known	templated	pig	24	418	0	22	2	0	three_temp	three_prime	12	0	0	0
TAAAGTGCTTATAGTGCAGGTAT	miRNA	ssc-miR-20a	mature	known	non-templated	pig	23	512	0	22	1	0	three_non-temp	three_prime	10	0	0	0
TAACACTGTCTGGTAAAGAT	miRNA	bta-miR-141	mature	novel	templated	cattle	20	665	0	20	2	0	three_temp	three_prime	2	0	1	0
TAACACTGTCTGGTAAAGATG	miRNA	bta-miR-141	mature	novel	templated	cattle	21	879	0	21	1	0	three_temp	three_prime	1	1	1	0
TAACACTGTCTGGTAAAGATGGC	miRNA	bta-miR-141	mature	novel	templated	cattle	23	428	0	22	1	0	three_temp	three_prime	3	0	1	0
TAACACTGTCTGGTAAC	miRNA	bta-miR-200a	mature	novel	templated	cattle	17	20784	0	17	6	0	three_temp	three_prime	5	0	1	0
TAACACTGTCTGGTAACG	miRNA	bta-miR-200a	mature	novel	templated	cattle	18	3773	0	18	5	0	three_temp	three_prime	12	0	0	0
TAACACTGTCTGGTAACGA	miRNA	bta-miR-200a	mature	novel	templated	cattle	19	485	0	19	4	0	three_temp	three_prime	31	0	0	0
TAACACTGTCTGGTAACGAC	miRNA	bta-miR-200a	mature	novel	non-templated	cattle	20	1056	0	19	4	0	three_non-temp	three_prime	23	0	0	0
TAACACTGTCTGGTAACGAT	miRNA	bta-miR-200a	mature	novel	templated	cattle	20	4892	0	20	3	0	three_temp	three_prime	9	0	0	0
TAACACTGTCTGGTAACGATA	miRNA	bta-miR-200a	mature	novel	non-templated	cattle	21	1499	0	20	3	0	three_non-temp	three_prime	16	0	0	0
TAACACTGTCTGGTAACGATG	miRNA	bta-miR-200a	mature	novel	templated	cattle	21	24051	0	21	2	0	three_temp	three_prime	4	0	1	0
TAACACTGTCTGGTAACGATGA	miRNA	bta-miR-200a	mature	novel	non-templated	cattle	22	1433	0	21	2	0	three_non-temp	three_prime	18	0	0	0
TAACACTGTCTGGTAACGATGC	miRNA	bta-miR-200a	mature	novel	non-templated	cattle	22	15171	0	21	2	0	three_non-temp	three_prime	6	0	0	0
TAACACTGTCTGGTAACGATGCT	miRNA	hsa-miR-200a-3p	mature	novel	non-templated	human	23	1214	0	21	2	0	three_non-temp	three_prime	4	0	1	0
TAACACTGTCTGGTAACGATGG	miRNA	bta-miR-200a	mature	novel	non-templated	cattle	22	1467	0	21	2	0	three_non-temp	three_prime	17	0	0	0
TAACACTGTCTGGTAACGATGGT	miRNA	hsa-miR-200a-3p	mature	novel	non-templated	human	23	701	0	21	2	0	three_non-temp	three_prime	5	0	1	0
TAACACTGTCTGGTAACGATGT	miRNA	bta-miR-200a	mature	novel	templated	cattle	22	67182	0	22	1	0	three_temp	three_prime	2	0	1	0
TAACACTGTCTGGTAACGATGTA	miRNA	hsa-miR-200a-3p	mature	novel	non-templated	cattle	23	6242	0	22	1	0	three_non-temp	three_prime	2	0	1	0
TAACACTGTCTGGTAACGATGTG	miRNA	hsa-miR-200a-3p	mature	novel	non-templated	cattle	23	4375	0	22	1	0	three_non-temp	three_prime	3	0	1	0
TAACACTGTCTGGTAACGATGTT	miRNA	bta-miR-200a	mature	novel	templated	cattle	23	314495	0	23	0	1	mature	mature	1	1	1	0
TAACACTGTCTGGTAACGATGTTA	miRNA	bta-miR-200a	mature	novel	non-templated	cattle	24	1343	0	23	1	0	three_non-temp	three_prime	19	0	0	0
TAACACTGTCTGGTAACGATGTTC	miRNA	bta-miR-200a	mature	novel	templated	cattle	24	911	0	23	1	0	three_temp	three_prime	25	0	0	0
TAACACTGTCTGGTAACGATGTTT	miRNA	bta-miR-200a	mature	novel	non-templated	cattle	24	3778	0	23	1	0	three_non-temp	three_prime	11	0	0	0
TAACACTGTCTGGTAAT	miRNA	bta-miR-200a	mature	novel	non-templated	cattle	17	1338	0	16	7	0	three_non-temp	three_prime	20	0	0	0
TAAGACTTGCAGTGATGTTT	miRNA	ssc-miR-499-5p	mature	known	templated	pig	20	389	1	20	0	0	five_temp	five_prime	5	0	1	0
TAAGACTTGCAGTGATGTTTA	miRNA	ssc-miR-499-5p	mature	known	templated	pig	21	878	-1	20	1	0	both_temp	both	3	0	1	0
TAAGGTGCATCTAGTGCAGAT	miRNA	ssc-miR-18a	mature	known	templated	pig	21	434	0	21	1	0	three_temp	three_prime	4	0	1	0
TAAGGTGCATCTAGTGCAGATA	miRNA	ssc-miR-18a	mature	known	templated	pig	22	392	0	22	0	1	mature	mature	5	0	1	0
TAAGGTGCATCTAGTGCAGATAA	miRNA	ssc-miR-18a	mature	known	non-templated	pig	23	518	0	22	1	0	three_non-temp	three_prime	3	0	1	0
TAAGGTGCATCTAGTGCAGATAG	miRNA	ssc-miR-18a	mature	known	templated	pig	23	11153	0	22	1	0	three_temp	three_prime	1	1	1	0
TAAGGTGCATCTAGTGCAGATAGA	miRNA	ssc-miR-18a	mature	known	non-templated	pig	24	283	0	22	2	0	three_non-temp	three_prime	6	0	0	0
TAAGTGCTTCCATGCTTTAGT	miRNA	hsa-miR-302e	mature	novel	non-templated	human	21	1273	0	17	4	0	three_non-temp	three_prime	2	0	1	0
TAAGTGCTTCCATGCTTTAGTAGA	miRNA	hsa-miR-302e	mature	novel	non-templated	human	24	750	0	17	7	0	three_non-temp	three_prime	3	0	1	0
TAAGTGCTTCCATGCTTTAGTGA	miRNA	hsa-miR-302e	mature	novel	non-templated	human	23	578	0	17	6	0	three_non-temp	three_prime	4	0	1	0
TAAGTGCTTCCATGTTTC	miRNA	bta-miR-302c	mature	novel	templated	cattle	18	2750	0	18	5	0	three_temp	three_prime	7	0	0	0
TAAGTGCTTCCATGTTTCAGC	miRNA	bta-miR-302c	mature	novel	non-templated	cattle	21	543	0	20	3	0	three_non-temp	three_prime	21	0	0	0
TAAGTGCTTCCATGTTTCAGT	miRNA	bta-miR-302c	mature	novel	templated	cattle	21	2757	0	21	2	0	three_temp	three_prime	6	0	0	0
TAAGTGCTTCCATGTTTCAGTG	miRNA	bta-miR-302c	mature	novel	templated	cattle	22	4579	0	22	1	0	three_temp	three_prime	4	0	1	0
TAAGTGCTTCCATGTTTCAGTGA	miRNA	bta-miR-302c	mature	novel	non-templated	cattle	23	2025	0	22	1	0	three_non-temp	three_prime	10	0	0	0
TAAGTGCTTCCATGTTTCAGTGC	miRNA	bta-miR-302c	mature	novel	non-templated	cattle	23	574	0	22	1	0	three_non-temp	three_prime	20	0	0	0
TAAGTGCTTCCATGTTTCAGTGG	miRNA	bta-miR-302c	mature	novel	templated	cattle	23	16878	0	23	0	1	mature	mature	1	1	1	0
TAAGTGCTTCCATGTTTCAGTGGA	miRNA	bta-miR-302c	mature	novel	templated	cattle	24	513	0	23	1	0	three_temp	three_prime	22	0	0	0
TAAGTGCTTCCATGTTTCAGTGGC	miRNA	bta-miR-302c	mature	novel	non-templated	cattle	24	674	0	23	1	0	three_non-temp	three_prime	18	0	0	0
TAAGTGCTTCCATGTTTCAGTGGT	miRNA	bta-miR-302c	mature	novel	non-templated	cattle	24	3273	0	23	1	0	three_non-temp	three_prime	5	0	1	0
TAAGTGCTTCCATGTTTCAGTGT	miRNA	bta-miR-302c	mature	novel	non-templated	cattle	23	1071	0	22	1	0	three_non-temp	three_prime	14	0	0	0
TAAGTGCTTCCATGTTTT	miRNA	bta-miR-302d	mature	novel	templated	cattle	18	16581	0	18	3	0	three_temp	three_prime	9	0	0	0
TAAGTGCTTCCATGTTTTAG	miRNA	bta-miR-302d	mature	novel	templated	cattle	20	2669	0	20	1	0	three_temp	three_prime	17	0	0	0
TAAGTGCTTCCATGTTTTAGA	miRNA	bta-miR-302d	mature	novel	non-templated	cattle	21	5296	0	20	1	0	three_non-temp	three_prime	14	0	0	0
TAAGTGCTTCCATGTTTTAGC	miRNA	bta-miR-302d	mature	novel	non-templated	cattle	21	87940	0	20	1	0	three_non-temp	three_prime	4	0	1	0
TAAGTGCTTCCATGTTTTAGCAG	miRNA	bta-miR-302d	mature	novel	non-templated	cattle	23	2731	0	20	3	0	three_non-temp	three_prime	16	0	0	0
TAAGTGCTTCCATGTTTTAGCAGA	miRNA	bta-miR-302d	mature	novel	non-templated	cattle	24	435	0	20	4	0	three_non-temp	three_prime	29	0	0	0
TAAGTGCTTCCATGTTTTAGCGA	miRNA	bta-miR-302d	mature	novel	non-templated	cattle	23	491	0	20	3	0	three_non-temp	three_prime	26	0	0	0
TAAGTGCTTCCATGTTTTAGG	miRNA	bta-miR-302d	mature	novel	non-templated	cattle	21	8011	0	20	1	0	three_non-temp	three_prime	13	0	0	0
TAAGTGCTTCCATGTTTTAGT	miRNA	bta-miR-302d	mature	novel	templated	cattle	21	440470	0	21	0	1	mature	mature	1	1	1	0
TAAGTGCTTCCATGTTTTAGTA	miRNA	bta-miR-302b	mature	novel	templated	cattle	22	31308	0	22	1	0	three_temp	three_prime	5	0	1	0
TAAGTGCTTCCATGTTTTAGTAA	miRNA	bta-miR-302d	mature	novel	non-templated	cattle	23	93136	0	21	2	0	three_non-temp	three_prime	2	0	1	0
TAAGTGCTTCCATGTTTTAGTAAA	miRNA	bta-miR-302d	mature	novel	non-templated	cattle	24	472	0	21	3	0	three_non-temp	three_prime	27	0	0	0
TAAGTGCTTCCATGTTTTAGTAC	miRNA	bta-miR-302d	mature	novel	non-templated	cattle	23	13737	0	21	2	0	three_non-temp	three_prime	10	0	0	0
TAAGTGCTTCCATGTTTTAGTAG	miRNA	bta-miR-302b	mature	novel	templated	cattle	23	1789784	0	23	0	1	mature	mature	1	1	1	0
TAAGTGCTTCCATGTTTTAGTAGA	miRNA	bta-miR-302b	mature	novel	templated	cattle	24	249869	0	23	1	0	three_temp	three_prime	3	0	1	0
TAAGTGCTTCCATGTTTTAGTAGAA	miRNA	bta-miR-302b	mature	novel	templated	cattle	25	6219	0	23	2	0	three_temp	three_prime	9	0	0	0
TAAGTGCTTCCATGTTTTAGTAGAAA	miRNA	bta-miR-302b	mature	novel	non-templated	cattle	26	681	0	23	3	0	three_non-temp	three_prime	21	0	0	0
TAAGTGCTTCCATGTTTTAGTAGC	miRNA	bta-miR-302b	mature	novel	non-templated	cattle	24	2018	0	23	1	0	three_non-temp	three_prime	16	0	0	0
TAAGTGCTTCCATGTTTTAGTAGG	miRNA	bta-miR-302b	mature	novel	templated	cattle	24	4721	0	23	1	0	three_temp	three_prime	10	0	0	0
TAAGTGCTTCCATGTTTTAGTAGT	miRNA	bta-miR-302b	mature	novel	non-templated	cattle	24	10484	0	23	1	0	three_non-temp	three_prime	7	0	0	0
TAAGTGCTTCCATGTTTTAGTAT	miRNA	bta-miR-302d	mature	novel	non-templated	cattle	23	8779	0	21	2	0	three_non-temp	three_prime	12	0	0	0
TAAGTGCTTCCATGTTTTAGTC	miRNA	bta-miR-302d	mature	novel	non-templated	cattle	22	429	0	21	1	0	three_non-temp	three_prime	30	0	0	0
TAAGTGCTTCCATGTTTTAGTG	miRNA	bta-miR-302d	mature	novel	templated	cattle	22	44076	0	21	1	0	three_temp	three_prime	6	0	0	0
TAAGTGCTTCCATGTTTTAGTGA	miRNA	bta-miR-302a	mature	novel	templated	cattle	23	195362	1	22	0	0	five_temp	five_prime	1	1	1	0
TAAGTGCTTCCATGTTTTAGTGAA	miRNA	bta-miR-302a	mature	novel	non-templated	cattle	24	5154	1	22	1	0	both_non-temp	both	13	0	0	0
TAAGTGCTTCCATGTTTTAGTGAAA	miRNA	bta-miR-302a	mature	novel	non-templated	cattle	25	1031	1	22	2	0	both_non-temp	both	28	0	0	0
TAAGTGCTTCCATGTTTTAGTGAC	miRNA	bta-miR-302a	mature	novel	non-templated	cattle	24	361	1	22	1	0	both_non-temp	both	42	0	0	0
TAAGTGCTTCCATGTTTTAGTGAT	miRNA	bta-miR-302a	mature	novel	templated	cattle	24	871	1	22	1	0	both_temp	both	32	0	0	0
TAAGTGCTTCCATGTTTTAGTGC	miRNA	bta-miR-302d	mature	novel	templated	cattle	23	18878	0	21	2	0	three_temp	three_prime	7	0	0	0
TAAGTGCTTCCATGTTTTAGTGG	miRNA	bta-miR-302d	mature	novel	non-templated	cattle	23	10235	0	21	2	0	three_non-temp	three_prime	11	0	0	0
TAAGTGCTTCCATGTTTTAGTGGA	miRNA	bta-miR-302d	mature	novel	non-templated	cattle	24	628	0	21	3	0	three_non-temp	three_prime	23	0	0	0
TAAGTGCTTCCATGTTTTAGTGT	miRNA	bta-miR-302d	mature	novel	non-templated	cattle	23	67809	0	21	2	0	three_non-temp	three_prime	5	0	1	0
TAAGTGCTTCCATGTTTTAGTGTA	miRNA	bta-miR-302d	mature	novel	non-templated	cattle	24	461	0	21	3	0	three_non-temp	three_prime	28	0	0	0
TAAGTGCTTCCATGTTTTAGTGTT	miRNA	bta-miR-302d	mature	novel	non-templated	cattle	24	419	0	21	3	0	three_non-temp	three_prime	31	0	0	0
TAAGTGCTTCCATGTTTTAGTT	miRNA	bta-miR-302d	mature	novel	non-templated	cattle	22	825	0	21	1	0	three_non-temp	three_prime	22	0	0	0
TAAGTGCTTCCATGTTTTAGTTC	miRNA	bta-miR-302d	mature	novel	non-templated	cattle	23	349	0	21	2	0	three_non-temp	three_prime	33	0	0	0
TAAGTGCTTCCATGTTTTAGTTG	miRNA	bta-miR-302d	mature	novel	non-templated	cattle	23	1039	0	21	2	0	three_non-temp	three_prime	21	0	0	0
TAAGTGCTTCCATGTTTTGGT	miRNA	hsa-miR-302a-3p	mature	novel	templated	human	21	1050	0	21	2	0	three_temp	three_prime	1	1	1	0
TAAGTGCTTCCATGTTTTGGTGA	miRNA	hsa-miR-302a-3p	mature	novel	templated	human	23	406	0	23	0	1	mature	mature	2	0	1	0
TAATACTGCCGGGTAATGAC	miRNA	bta-miR-200c	mature	novel	non-templated	cattle	20	340	0	19	4	0	three_non-temp	three_prime	24	0	0	0
TAATACTGCCGGGTAATGAT	miRNA	bta-miR-200c	mature	novel	templated	cattle	20	1730	0	20	3	0	three_temp	three_prime	10	0	0	0
TAATACTGCCGGGTAATGATA	miRNA	bta-miR-200c	mature	novel	non-templated	cattle	21	1087	0	20	3	0	three_non-temp	three_prime	12	0	0	0
TAATACTGCCGGGTAATGATG	miRNA	bta-miR-200c	mature	novel	templated	cattle	21	13382	0	21	2	0	three_temp	three_prime	3	0	1	0
TAATACTGCCGGGTAATGATGA	miRNA	bta-miR-200c	mature	novel	non-templated	cattle	22	880	0	21	2	0	three_non-temp	three_prime	17	0	0	0
TAATACTGCCGGGTAATGATGG	miRNA	bta-miR-200c	mature	novel	templated	cattle	22	7108	0	22	1	0	three_temp	three_prime	4	0	1	0
TAATACTGCCGGGTAATGATGGA	miRNA	bta-miR-200c	mature	novel	templated	cattle	23	84533	0	23	0	1	mature	mature	1	1	1	0
TAATACTGCCGGGTAATGATGGAA	miRNA	bta-miR-200c	mature	novel	non-templated	cattle	24	5463	0	23	1	0	three_non-temp	three_prime	5	0	1	0
TAATACTGCCGGGTAATGATGGAAT	miRNA	bta-miR-200c	mature	novel	non-templated	cattle	25	503	0	23	2	0	three_non-temp	three_prime	19	0	0	0
TAATACTGCCGGGTAATGATGGAC	miRNA	bta-miR-200c	mature	novel	non-templated	cattle	24	925	0	23	1	0	three_non-temp	three_prime	15	0	0	0
TAATACTGCCGGGTAATGATGGAT	miRNA	bta-miR-200c	mature	novel	non-templated	cattle	24	4251	0	23	1	0	three_non-temp	three_prime	6	0	0	0
TAATACTGCCGGGTAATGATGGATT	miRNA	bta-miR-200c	mature	novel	non-templated	cattle	25	518	0	23	2	0	three_non-temp	three_prime	18	0	0	0
TAATACTGCCGGGTAATGATGGC	miRNA	bta-miR-200c	mature	novel	non-templated	cattle	23	454	0	22	1	0	three_non-temp	three_prime	20	0	0	0
TAATACTGCCGGGTAATGATGGG	miRNA	bta-miR-200c	mature	novel	non-templated	cattle	23	2200	0	22	1	0	three_non-temp	three_prime	8	0	0	0
TAATACTGCCGGGTAATGATGGT	miRNA	bta-miR-200c	mature	novel	non-templated	cattle	23	2114	0	22	1	0	three_non-temp	three_prime	9	0	0	0
TAATACTGCCGGGTAATGATGT	miRNA	bta-miR-200c	mature	novel	non-templated	cattle	22	1022	0	21	2	0	three_non-temp	three_prime	14	0	0	0
TAATACTGCCTGGTAATGAT	miRNA	bta-miR-200b	mature	novel	templated	cattle	20	780	0	20	1	0	three_temp	three_prime	17	0	0	0
TAATACTGCCTGGTAATGATA	miRNA	bta-miR-200b	mature	novel	non-templated	cattle	21	2866	0	20	1	0	three_non-temp	three_prime	12	0	0	0
TAATACTGCCTGGTAATGATG	miRNA	bta-miR-200b	mature	novel	templated	cattle	21	47406	0	21	0	1	mature	mature	5	0	1	0
TAATACTGCCTGGTAATGATGA	miRNA	bta-miR-200b	mature	novel	templated	cattle	22	42242	0	21	1	0	three_temp	three_prime	7	0	0	0
TAATACTGCCTGGTAATGATGAA	miRNA	bta-miR-200b	mature	novel	non-templated	cattle	23	5693	0	21	2	0	three_non-temp	three_prime	11	0	0	0
TAATACTGCCTGGTAATGATGAAA	miRNA	bta-miR-200b	mature	novel	non-templated	cattle	24	551	0	21	3	0	three_non-temp	three_prime	21	0	0	0
TAATACTGCCTGGTAATGATGAC	miRNA	bta-miR-200b	mature	novel	templated	cattle	23	578176	0	21	2	0	three_temp	three_prime	1	1	1	0
TAATACTGCCTGGTAATGATGACA	miRNA	bta-miR-200b	mature	novel	non-templated	cattle	24	94353	0	21	3	0	three_non-temp	three_prime	2	0	1	0
TAATACTGCCTGGTAATGATGACC	miRNA	bta-miR-200b	mature	novel	non-templated	cattle	24	44451	0	21	3	0	three_non-temp	three_prime	6	0	0	0
TAATACTGCCTGGTAATGATGACG	miRNA	bta-miR-200b	mature	novel	templated	cattle	24	13267	0	21	3	0	three_temp	three_prime	8	0	0	0
TAATACTGCCTGGTAATGATGACT	miRNA	bta-miR-200b	mature	novel	non-templated	cattle	24	84334	0	21	3	0	three_non-temp	three_prime	3	0	1	0
TAATACTGCCTGGTAATGATGAG	miRNA	bta-miR-200b	mature	novel	non-templated	cattle	23	857	0	21	2	0	three_non-temp	three_prime	16	0	0	0
TAATACTGCCTGGTAATGATGAT	miRNA	bta-miR-200b	mature	novel	non-templated	cattle	23	60135	0	21	2	0	three_non-temp	three_prime	4	0	1	0
TAATACTGCCTGGTAATGATGATA	miRNA	bta-miR-200b	mature	novel	non-templated	cattle	24	322	0	21	3	0	three_non-temp	three_prime	29	0	0	0
TAATACTGCCTGGTAATGATGATT	miRNA	bta-miR-200b	mature	novel	non-templated	cattle	24	631	0	21	3	0	three_non-temp	three_prime	18	0	0	0
TAATACTGCCTGGTAATGATGC	miRNA	bta-miR-200b	mature	novel	non-templated	cattle	22	621	0	21	1	0	three_non-temp	three_prime	19	0	0	0
TAATACTGCCTGGTAATGATGG	miRNA	bta-miR-200b	mature	novel	non-templated	cattle	22	872	0	21	1	0	three_non-temp	three_prime	15	0	0	0
TAATACTGCCTGGTAATGATGGC	miRNA	bta-miR-200b	mature	novel	non-templated	cattle	23	2779	0	21	2	0	three_non-temp	three_prime	13	0	0	0
TAATACTGCCTGGTAATGATGGCA	miRNA	bta-miR-200b	mature	novel	non-templated	cattle	24	424	0	21	3	0	three_non-temp	three_prime	26	0	0	0
TAATACTGCCTGGTAATGATGGCT	miRNA	bta-miR-200b	mature	novel	non-templated	cattle	24	417	0	21	3	0	three_non-temp	three_prime	28	0	0	0
TAATACTGCCTGGTAATGATGGT	miRNA	bta-miR-200b	mature	novel	non-templated	cattle	23	552	0	21	2	0	three_non-temp	three_prime	20	0	0	0
TAATACTGCCTGGTAATGATGT	miRNA	bta-miR-200b	mature	novel	non-templated	cattle	22	2668	0	21	1	0	three_non-temp	three_prime	14	0	0	0
TAATACTGCCTGGTAATGATGTC	miRNA	bta-miR-200b	mature	novel	non-templated	cattle	23	483	0	21	2	0	three_non-temp	three_prime	25	0	0	0
TAATACTGCCTGGTAATGATT	miRNA	bta-miR-200b	mature	novel	non-templated	cattle	21	424	0	20	1	0	three_non-temp	three_prime	27	0	0	0
TAATACTGTCTGGTAATGC	miRNA	ssc-miR-429	mature	known	templated	pig	19	380	0	19	3	0	three_temp	three_prime	13	0	0	0
TAATACTGTCTGGTAATGCC	miRNA	ssc-miR-429	mature	known	templated	pig	20	1352	0	20	2	0	three_temp	three_prime	7	0	0	0
TAATACTGTCTGGTAATGCCA	miRNA	ssc-miR-429	mature	known	non-templated	pig	21	890	0	20	2	0	three_non-temp	three_prime	10	0	0	0
TAATACTGTCTGGTAATGCCG	miRNA	ssc-miR-429	mature	known	templated	pig	21	7804	0	21	1	0	three_temp	three_prime	4	0	1	0
TAATACTGTCTGGTAATGCCGA	miRNA	ssc-miR-429	mature	known	non-templated	pig	22	1061	0	21	1	0	three_non-temp	three_prime	9	0	0	0
TAATACTGTCTGGTAATGCCGC	miRNA	ssc-miR-429	mature	known	non-templated	pig	22	10442	0	21	1	0	three_non-temp	three_prime	2	0	1	0
TAATACTGTCTGGTAATGCCGG	miRNA	ssc-miR-429	mature	known	non-templated	pig	22	1129	0	21	1	0	three_non-temp	three_prime	8	0	0	0
TAATACTGTCTGGTAATGCCGT	miRNA	ssc-miR-429	mature	known	templated	pig	22	48869	0	22	0	1	mature	mature	1	1	1	0
TAATACTGTCTGGTAATGCCGTA	miRNA	ssc-miR-429	mature	known	non-templated	pig	23	357	0	22	1	0	three_non-temp	three_prime	15	0	0	0
TAATACTGTCTGGTAATGCCGTT	miRNA	ssc-miR-429	mature	known	non-templated	pig	23	371	0	22	1	0	three_non-temp	three_prime	14	0	0	0
TAATACTGTCTGGTAATGCCT	miRNA	ssc-miR-429	mature	known	non-templated	pig	21	425	0	20	2	0	three_non-temp	three_prime	12	0	0	0
TAATACTGTCTGGTAATGCT	miRNA	ssc-miR-429	mature	known	non-templated	pig	20	507	0	19	3	0	three_non-temp	three_prime	11	0	0	0
TAATCCTTGCTACCTGGGTGAGAGT	miRNA	bta-miR-500	mature	novel	templated	cattle	25	778	0	23	2	0	three_temp	three_prime	1	1	1	0
TAATGCCCCTAAAAATCCTTAC	miRNA	ssc-miR-365-3p	mature	known	non-templated	pig	22	501	0	21	1	0	three_non-temp	three_prime	2	0	1	0
TAATGCCCCTAAAAATCCTTAT	miRNA	ssc-miR-365-3p	mature	known	templated	pig	22	1315	0	22	0	1	mature	mature	1	1	1	0
TAATGGATTTTTGGAGCT	miRNA	bta-miR-1246	mature	novel	non-templated	cattle	18	443	1	16	3	0	both_non-temp	both	10	0	0	0
TAATTTTATGTATAAGCTAGC	miRNA	hsa-miR-590-3p	mature	novel	non-templated	human	21	303	0	20	1	0	three_non-temp	three_prime	2	0	1	0
TAATTTTATGTATAAGCTAGT	miRNA	hsa-miR-590-3p	mature	novel	templated	human	21	1701	0	21	0	1	mature	mature	1	1	1	0
TACAGTACTGTGATAACTGA	miRNA	ssc-miR-101	mature	known	templated	pig	20	3560	0	20	1	0	three_temp	three_prime	4	0	1	0
TACAGTACTGTGATAACTGAA	miRNA	ssc-miR-101	mature	known	templated	pig	21	7402	0	21	0	1	mature	mature	3	0	1	0
TACAGTACTGTGATAACTGAAA	miRNA	ssc-miR-101	mature	known	non-templated	pig	22	3164	0	21	1	0	three_non-temp	three_prime	5	0	1	0
TACAGTACTGTGATAACTGAAG	miRNA	ssc-miR-101	mature	known	templated	pig	22	12155	0	21	1	0	three_temp	three_prime	2	0	1	0
TACAGTACTGTGATAACTGAAGA	miRNA	ssc-miR-101	mature	known	templated	pig	23	1948	0	21	2	0	three_temp	three_prime	8	0	0	0
TACAGTACTGTGATAACTGAAGT	miRNA	ssc-miR-101	mature	known	non-templated	pig	23	505	0	21	2	0	three_non-temp	three_prime	18	0	0	0
TACAGTACTGTGATAACTGAAT	miRNA	ssc-miR-101	mature	known	non-templated	pig	22	457	0	21	1	0	three_non-temp	three_prime	19	0	0	0
TACCACAGGGTAGAACCACGG	miRNA	ssc-miR-140-3p	mature	known	templated	pig	21	1184	0	21	2	0	three_temp	three_prime	8	0	0	0
TACCACAGGGTAGAACCACGGA	miRNA	ssc-miR-140-3p	mature	known	templated	pig	22	1188	0	22	1	0	three_temp	three_prime	7	0	0	0
TACCACAGGGTAGAACCACGGAC	miRNA	ssc-miR-140-3p	mature	known	templated	pig	23	818	0	23	0	1	mature	mature	9	0	0	0
TACCACAGGGTAGAACCACGGACA	miRNA	ssc-miR-140-3p	mature	known	templated	pig	24	1415	0	23	1	0	three_temp	three_prime	5	0	1	0
TACCACAGGGTAGAACCACGGACT	miRNA	ssc-miR-140-3p	mature	known	non-templated	pig	24	474	0	23	1	0	three_non-temp	three_prime	13	0	0	0
TACCCATTGCATATCGGAGTTG	miRNA	hsa-miR-660-5p	mature	novel	templated	human	22	1367	0	22	0	1	mature	mature	1	1	1	0
TACCCATTGCATATCGGAGTTGT	miRNA	hsa-miR-660-5p	mature	novel	templated	human	23	817	0	22	1	0	three_temp	three_prime	2	0	1	0
TACCCTGTAGAACCGAATC	miRNA	ssc-miR-10b	mature	known	non-templated	pig	19	385	0	18	4	0	three_non-temp	three_prime	23	0	0	0
TACCCTGTAGAACCGAATT	miRNA	ssc-miR-10b	mature	known	templated	pig	19	2826	0	19	3	0	three_temp	three_prime	13	0	0	0
TACCCTGTAGAACCGAATTT	miRNA	ssc-miR-10b	mature	known	templated	pig	20	618	0	20	2	0	three_temp	three_prime	18	0	0	0
TACCCTGTAGAACCGAATTTA	miRNA	ssc-miR-10b	mature	known	non-templated	pig	21	332	0	20	2	0	three_non-temp	three_prime	25	0	0	0
TACCCTGTAGAACCGAATTTG	miRNA	ssc-miR-10b	mature	known	templated	pig	21	9759	0	21	1	0	three_temp	three_prime	6	0	0	0
TACCCTGTAGAACCGAATTTGA	miRNA	ssc-miR-10b	mature	known	non-templated	pig	22	1200	0	21	1	0	three_non-temp	three_prime	15	0	0	0
TACCCTGTAGAACCGAATTTGC	miRNA	ssc-miR-10b	mature	known	non-templated	pig	22	14720	0	21	1	0	three_non-temp	three_prime	4	0	1	0
TACCCTGTAGAACCGAATTTGG	miRNA	ssc-miR-10b	mature	known	non-templated	pig	22	1460	0	21	1	0	three_non-temp	three_prime	14	0	0	0
TACCCTGTAGAACCGAATTTGT	miRNA	ssc-miR-10b	mature	known	templated	pig	22	65572	0	22	0	1	mature	mature	2	0	1	0
TACCCTGTAGAACCGAATTTGTA	miRNA	ssc-miR-10b	mature	known	non-templated	pig	23	4270	0	22	1	0	three_non-temp	three_prime	9	0	0	0
TACCCTGTAGAACCGAATTTGTG	miRNA	ssc-miR-10b	mature	known	templated	pig	23	69654	0	22	1	0	three_temp	three_prime	1	1	1	0
TACCCTGTAGAACCGAATTTGTGA	miRNA	ssc-miR-10b	mature	known	non-templated	pig	24	2903	0	22	2	0	three_non-temp	three_prime	12	0	0	0
TACCCTGTAGAACCGAATTTGTGT	miRNA	ssc-miR-10b	mature	known	templated	pig	24	1022	0	22	2	0	three_temp	three_prime	16	0	0	0
TACCCTGTAGAACCGAATTTGTT	miRNA	ssc-miR-10b	mature	known	non-templated	pig	23	568	0	22	1	0	three_non-temp	three_prime	19	0	0	0
TACCCTGTAGATCCGAAT	miRNA	ssc-miR-10a-5p	mature	known	templated	pig	18	845	0	18	4	0	three_temp	three_prime	25	0	0	0
TACCCTGTAGATCCGAATC	miRNA	ssc-miR-10a-5p	mature	known	non-templated	pig	19	819	0	18	4	0	three_non-temp	three_prime	26	0	0	0
TACCCTGTAGATCCGAATT	miRNA	ssc-miR-10a-5p	mature	known	templated	pig	19	4788	0	19	3	0	three_temp	three_prime	10	0	0	0
TACCCTGTAGATCCGAATTC	miRNA	ssc-miR-10a-5p	mature	known	non-templated	pig	20	625	0	19	3	0	three_non-temp	three_prime	28	0	0	0
TACCCTGTAGATCCGAATTT	miRNA	ssc-miR-10a-5p	mature	known	templated	pig	20	4418	0	20	2	0	three_temp	three_prime	11	0	0	0
TACCCTGTAGATCCGAATTTA	miRNA	ssc-miR-10a-5p	mature	known	non-templated	pig	21	490	0	20	2	0	three_non-temp	three_prime	31	0	0	0
TACCCTGTAGATCCGAATTTG	miRNA	ssc-miR-10a-5p	mature	known	templated	pig	21	13652	0	21	1	0	three_temp	three_prime	6	0	0	0
TACCCTGTAGATCCGAATTTGA	miRNA	ssc-miR-10a-5p	mature	known	non-templated	pig	22	2358	0	21	1	0	three_non-temp	three_prime	16	0	0	0
TACCCTGTAGATCCGAATTTGC	miRNA	ssc-miR-10a-5p	mature	known	non-templated	pig	22	27401	0	21	1	0	three_non-temp	three_prime	5	0	1	0
TACCCTGTAGATCCGAATTTGG	miRNA	ssc-miR-10a-5p	mature	known	non-templated	pig	22	2875	0	21	1	0	three_non-temp	three_prime	14	0	0	0
TACCCTGTAGATCCGAATTTGT	miRNA	ssc-miR-10a-5p	mature	known	templated	pig	22	118370	0	22	0	1	mature	mature	1	1	1	0
TACCCTGTAGATCCGAATTTGTA	miRNA	ssc-miR-10a-5p	mature	known	non-templated	pig	23	2709	0	22	1	0	three_non-temp	three_prime	15	0	0	0
TACCCTGTAGATCCGAATTTGTG	miRNA	ssc-miR-10a-5p	mature	known	templated	pig	23	34521	0	22	1	0	three_temp	three_prime	3	0	1	0
TACCCTGTAGATCCGAATTTGTGA	miRNA	ssc-miR-10a-5p	mature	known	non-templated	pig	24	2252	0	22	2	0	three_non-temp	three_prime	17	0	0	0
TACCCTGTAGATCCGAATTTGTGC	miRNA	ssc-miR-10a-5p	mature	known	non-templated	pig	24	2122	0	22	2	0	three_non-temp	three_prime	18	0	0	0
TACCCTGTAGATCCGAATTTGTGT	miRNA	ssc-miR-10a-5p	mature	known	templated	pig	24	9168	0	22	2	0	three_temp	three_prime	8	0	0	0
TACCCTGTAGATCCGAATTTGTT	miRNA	ssc-miR-10a-5p	mature	known	non-templated	pig	23	615	0	22	1	0	three_non-temp	three_prime	29	0	0	0
TACTAGACTGAAGCTCCTTGAGG	miRNA	ssc-miR-151-3p	mature	known	templated	pig	23	1240	2	21	1	0	both_temp	both	13	0	0	0
TAGACTGAAGCTCCTTGAGA	miRNA	ssc-miR-151-3p	mature	known	non-templated	pig	20	578	-1	19	-2	0	both_non-temp	both	21	0	0	0
TAGACTGAAGCTCCTTGAGG	miRNA	ssc-miR-151-3p	mature	known	templated	pig	20	6689	-1	20	-1	0	both_temp	both	3	0	1	0
TAGACTGAAGCTCCTTGAGGA	miRNA	ssc-miR-151-3p	mature	known	templated	pig	21	3719	1	21	0	0	five_temp	five_prime	6	0	0	0
TAGACTGAAGCTCCTTGAGGAA	miRNA	ssc-miR-151-3p	mature	known	non-templated	pig	22	1304	-1	21	1	0	both_non-temp	both	11	0	0	0
TAGACTGAAGCTCCTTGAGGT	miRNA	ssc-miR-151-3p	mature	known	non-templated	pig	21	813	-1	20	1	0	both_non-temp	both	18	0	0	0
TAGCACCATCTGAAATC	miRNA	ssc-miR-29a	mature	known	templated	pig	17	743	-1	17	-5	0	both_temp	both	4	0	1	0
TAGCACCATCTGAAATCGGT	miRNA	ssc-miR-29a	mature	known	templated	pig	20	368	-1	20	-2	0	both_temp	both	7	0	0	0
TAGCACCATCTGAAATCGGTT	miRNA	ssc-miR-29a	mature	known	templated	pig	21	1591	-1	21	-1	0	both_temp	both	3	0	1	0
TAGCACCATCTGAAATCGGTTA	miRNA	ssc-miR-29a	mature	known	templated	pig	22	2079	1	22	0	0	five_temp	five_prime	1	1	1	0
TAGCAGCACATCATGGTTTACA	miRNA	ssc-miR-15b	mature	known	templated	pig	22	1415	0	22	0	1	mature	mature	1	1	1	0
TAGCAGCACGTAAATATTGG	miRNA	ssc-miR-16	mature	known	templated	pig	20	546	0	20	2	0	three_temp	three_prime	4	0	1	0
TAGCAGCACGTAAATATTGGC	miRNA	ssc-miR-16	mature	known	templated	pig	21	1153	0	21	1	0	three_temp	three_prime	3	0	1	0
TAGCAGCACGTAAATATTGGCG	miRNA	ssc-miR-16	mature	known	templated	pig	22	1696	0	22	0	1	mature	mature	1	1	1	0
TAGCAGCACGTAAATATTGGCGT	miRNA	ssc-miR-16	mature	known	templated	pig	23	1586	0	22	1	0	three_temp	three_prime	2	0	1	0
TAGCAGCGGGAACAGTACC	miRNA	ssc-miR-503	mature	known	non-templated	pig	19	1015	0	18	5	0	three_non-temp	three_prime	8	0	0	0
TAGCAGCGGGAACAGTACT	miRNA	ssc-miR-503	mature	known	templated	pig	19	4628	0	19	4	0	three_temp	three_prime	2	0	1	0
TAGCAGCGGGAACAGTACTA	miRNA	ssc-miR-503	mature	known	non-templated	pig	20	665	0	19	4	0	three_non-temp	three_prime	13	0	0	0
TAGCAGCGGGAACAGTACTG	miRNA	ssc-miR-503	mature	known	templated	pig	20	11629	0	20	3	0	three_temp	three_prime	1	1	1	0
TAGCAGCGGGAACAGTACTGA	miRNA	ssc-miR-503	mature	known	non-templated	pig	21	916	0	20	3	0	three_non-temp	three_prime	9	0	0	0
TAGCAGCGGGAACAGTACTGC	miRNA	ssc-miR-503	mature	known	templated	pig	21	1464	0	21	2	0	three_temp	three_prime	7	0	0	0
TAGCAGCGGGAACAGTACTGCA	miRNA	ssc-miR-503	mature	known	templated	pig	22	1823	0	22	1	0	three_temp	three_prime	6	0	0	0
TAGCAGCGGGAACAGTACTGCAG	miRNA	ssc-miR-503	mature	known	templated	pig	23	4526	0	23	0	1	mature	mature	3	0	1	0
TAGCAGCGGGAACAGTACTGCAGA	miRNA	ssc-miR-503	mature	known	non-templated	pig	24	2980	0	23	1	0	three_non-temp	three_prime	4	0	1	0
TAGCAGCGGGAACAGTACTGCAGT	miRNA	ssc-miR-503	mature	known	templated	pig	24	808	0	23	1	0	three_temp	three_prime	11	0	0	0
TAGCAGCGGGAACAGTACTGT	miRNA	ssc-miR-503	mature	known	non-templated	pig	21	360	0	20	3	0	three_non-temp	three_prime	15	0	0	0
TAGCTCGGTCTGAGGCCCCTCAGT	miRNA	ssc-miR-423-3p	mature	known	non-templated	pig	24	1446	1	23	0	0	five_non-temp	five_prime	22	0	0	0
TAGCTTATCAGACTGAT	miRNA	ssc-miR-21	mature	known	templated	pig	17	992	0	17	5	0	three_temp	three_prime	51	0	0	0
TAGCTTATCAGACTGATA	miRNA	ssc-miR-21	mature	known	non-templated	pig	18	620	0	17	5	0	three_non-temp	three_prime	56	0	0	0
TAGCTTATCAGACTGATG	miRNA	ssc-miR-21	mature	known	templated	pig	18	15615	0	18	4	0	three_temp	three_prime	14	0	0	0
TAGCTTATCAGACTGATGC	miRNA	ssc-miR-21	mature	known	non-templated	pig	19	2460	0	18	4	0	three_non-temp	three_prime	32	0	0	0
TAGCTTATCAGACTGATGT	miRNA	ssc-miR-21	mature	known	templated	pig	19	11678	0	19	3	0	three_temp	three_prime	18	0	0	0
TAGCTTATCAGACTGATGTC	miRNA	ssc-miR-21	mature	known	non-templated	pig	20	1514	0	19	3	0	three_non-temp	three_prime	38	0	0	0
TAGCTTATCAGACTGATGTT	miRNA	ssc-miR-21	mature	known	templated	pig	20	7771	0	20	2	0	three_temp	three_prime	20	0	0	0
TAGCTTATCAGACTGATGTTA	miRNA	ssc-miR-21	mature	known	non-templated	pig	21	5817	0	20	2	0	three_non-temp	three_prime	21	0	0	0
TAGCTTATCAGACTGATGTTC	miRNA	ssc-miR-21	mature	known	non-templated	pig	21	2162	0	20	2	0	three_non-temp	three_prime	34	0	0	0
TAGCTTATCAGACTGATGTTG	miRNA	ssc-miR-21	mature	known	templated	pig	21	97349	0	21	1	0	three_temp	three_prime	7	0	0	0
TAGCTTATCAGACTGATGTTGA	miRNA	ssc-miR-21	mature	known	templated	pig	22	123256	0	22	0	1	mature	mature	6	0	0	0
TAGCTTATCAGACTGATGTTGAA	miRNA	ssc-miR-21	mature	known	non-templated	pig	23	53402	0	22	1	0	three_non-temp	three_prime	9	0	0	0
TAGCTTATCAGACTGATGTTGAAA	miRNA	ssc-miR-21	mature	known	non-templated	pig	24	4670	0	22	2	0	three_non-temp	three_prime	25	0	0	0
TAGCTTATCAGACTGATGTTGAC	miRNA	ssc-miR-21	mature	known	templated	pig	23	4385579	0	22	1	0	three_temp	three_prime	1	1	1	0
TAGCTTATCAGACTGATGTTGACA	miRNA	ssc-miR-21	mature	known	non-templated	pig	24	273126	0	22	2	0	three_non-temp	three_prime	4	0	1	0
TAGCTTATCAGACTGATGTTGACC	miRNA	ssc-miR-21	mature	known	non-templated	pig	24	137185	0	22	2	0	three_non-temp	three_prime	5	0	1	0
TAGCTTATCAGACTGATGTTGACG	miRNA	ssc-miR-21	mature	known	non-templated	pig	24	22368	0	22	2	0	three_non-temp	three_prime	12	0	0	0
TAGCTTATCAGACTGATGTTGACT	miRNA	ssc-miR-21	mature	known	templated	pig	24	274361	0	22	2	0	three_temp	three_prime	3	0	1	0
TAGCTTATCAGACTGATGTTGAG	miRNA	ssc-miR-21	mature	known	non-templated	pig	23	5073	0	22	1	0	three_non-temp	three_prime	24	0	0	0
TAGCTTATCAGACTGATGTTGAT	miRNA	ssc-miR-21	mature	known	non-templated	pig	23	497493	0	22	1	0	three_non-temp	three_prime	2	0	1	0
TAGCTTATCAGACTGATGTTGC	miRNA	ssc-miR-21	mature	known	non-templated	pig	22	442	0	21	1	0	three_non-temp	three_prime	66	0	0	0
TAGCTTATCAGACTGATGTTGCC	miRNA	ssc-miR-21	mature	known	non-templated	pig	23	919	0	21	2	0	three_non-temp	three_prime	53	0	0	0
TAGCTTATCAGACTGATGTTGG	miRNA	ssc-miR-21	mature	known	non-templated	pig	22	2693	0	21	1	0	three_non-temp	three_prime	31	0	0	0
TAGCTTATCAGACTGATGTTGGA	miRNA	ssc-miR-21	mature	known	non-templated	pig	23	784	0	21	2	0	three_non-temp	three_prime	54	0	0	0
TAGCTTATCAGACTGATGTTGGC	miRNA	ssc-miR-21	mature	known	non-templated	pig	23	23190	0	21	2	0	three_non-temp	three_prime	11	0	0	0
TAGCTTATCAGACTGATGTTGGCA	miRNA	ssc-miR-21	mature	known	non-templated	pig	24	1458	0	21	3	0	three_non-temp	three_prime	40	0	0	0
TAGCTTATCAGACTGATGTTGGCC	miRNA	ssc-miR-21	mature	known	non-templated	pig	24	576	0	21	3	0	three_non-temp	three_prime	59	0	0	0
TAGCTTATCAGACTGATGTTGGCT	miRNA	ssc-miR-21	mature	known	non-templated	pig	24	1287	0	21	3	0	three_non-temp	three_prime	42	0	0	0
TAGCTTATCAGACTGATGTTGGT	miRNA	ssc-miR-21	mature	known	non-templated	pig	23	5650	0	21	2	0	three_non-temp	three_prime	22	0	0	0
TAGCTTATCAGACTGATGTTGT	miRNA	ssc-miR-21	mature	known	non-templated	pig	22	2706	0	21	1	0	three_non-temp	three_prime	30	0	0	0
TAGCTTATCAGACTGATGTTGTC	miRNA	ssc-miR-21	mature	known	non-templated	pig	23	3670	0	21	2	0	three_non-temp	three_prime	27	0	0	0
TAGCTTATCAGACTGATGTTGTT	miRNA	ssc-miR-21	mature	known	non-templated	pig	23	502	0	21	2	0	three_non-temp	three_prime	62	0	0	0
TAGCTTATCAGACTGATGTTGTTC	miRNA	ssc-miR-21	mature	known	non-templated	pig	24	1828	0	21	3	0	three_non-temp	three_prime	36	0	0	0
TAGCTTATCAGACTGATGTTT	miRNA	ssc-miR-21	mature	known	non-templated	pig	21	1182	0	20	2	0	three_non-temp	three_prime	45	0	0	0
TAGGCAGTGTAATTAGCTGATT	miRNA	bta-miR-34b	mature	novel	templated	cattle	22	836	1	21	1	0	both_temp	both	1	1	1	0
TAGGCAGTGTAGTTAGCTGATTG	miRNA	ssc-miR-34c	mature	known	templated	pig	23	1027	1	22	1	0	both_temp	both	14	0	0	0
TAGGTAGTTTCATGTTGTTGG	miRNA	ssc-miR-196a	mature	known	templated	pig	21	648	0	21	1	0	three_temp	three_prime	2	0	1	0
TAGGTAGTTTCATGTTGTTGGG	miRNA	ssc-miR-196a	mature	known	templated	pig	22	3344	0	22	0	1	mature	mature	1	1	1	0
TAGTGCAATATTGCTTATAGGGTT	miRNA	bta-miR-454	mature	novel	templated	cattle	24	403	0	23	1	0	three_temp	three_prime	1	1	1	0
TAGTGGTTTTACCCTATGGTAG	miRNA	ssc-miR-140-5p	mature	known	non-templated	pig	22	428	1	21	0	0	five_non-temp	five_prime	4	0	1	0
TATAAAGCAATGAGACTGATT	miRNA	ssc-miR-340	mature	known	templated	pig	21	1960	1	21	0	0	five_temp	five_prime	2	0	1	0
TATAATACAACCTGATAAGTG	miRNA	ssc-miR-374a-5p	mature	known	templated	pig	21	526	1	21	0	0	five_temp	five_prime	2	0	1	0
TATAATACAACCTGCTAAGTG	miRNA	ssc-miR-374b-5p	mature	known	templated	pig	21	2732	1	21	0	0	five_temp	five_prime	2	0	1	0
TATATATATATATGTACGTATG	miRNA	hsa-miR-1277-5p	mature	novel	templated	human	22	532	-3	21	1	0	both_temp	both	1	1	1	0
TATCAGAATCTCCAGGGGTAC	miRNA	ssc-miR-361-5p	mature	known	templated	pig	21	687	1	21	0	0	five_temp	five_prime	3	0	1	0
TATCAGACTGATGTTGAC	miRNA	ssc-miR-21	mature	known	templated	pig	18	13189	-5	17	1	0	both_temp	both	16	0	0	0
TATCAGACTGATGTTGACA	miRNA	bta-miR-21-5p	mature	novel	non-templated	cattle	19	1216	-5	18	1	0	both_non-temp	both	7	0	0	0
TATCAGACTGATGTTGACC	miRNA	bta-miR-21-5p	mature	novel	non-templated	cattle	19	637	-5	18	1	0	both_non-temp	both	11	0	0	0
TATCAGACTGATGTTGACT	miRNA	bta-miR-21-5p	mature	novel	templated	cattle	19	1459	5	19	0	0	five_temp	five_prime	5	0	1	0
TATCAGACTGATGTTGAT	miRNA	ssc-miR-21	mature	known	non-templated	pig	18	1475	-5	17	1	0	both_non-temp	both	39	0	0	0
TATGACACGATCACTCCCGTTGAGT	miRNA	bta-miR-425-5p	mature	novel	non-templated	cattle	25	506	1	22	2	0	both_non-temp	both	3	0	1	0
TATGGCACTGGTAGAATTCAC	miRNA	ssc-miR-183	mature	known	templated	pig	21	1148	0	21	2	0	three_temp	three_prime	13	0	0	0
TATGGCACTGGTAGAATTCACA	miRNA	ssc-miR-183	mature	known	non-templated	pig	22	1650	0	21	2	0	three_non-temp	three_prime	9	0	0	0
TATGGCACTGGTAGAATTCACC	miRNA	ssc-miR-183	mature	known	non-templated	pig	22	12683	0	21	2	0	three_non-temp	three_prime	5	0	1	0
TATGGCACTGGTAGAATTCACG	miRNA	ssc-miR-183	mature	known	non-templated	pig	22	1417	0	21	2	0	three_non-temp	three_prime	11	0	0	0
TATGGCACTGGTAGAATTCACT	miRNA	ssc-miR-183	mature	known	templated	pig	22	58455	0	22	1	0	three_temp	three_prime	1	1	1	0
TATGGCACTGGTAGAATTCACTA	miRNA	ssc-miR-183	mature	known	non-templated	pig	23	1581	0	22	1	0	three_non-temp	three_prime	10	0	0	0
TATGGCACTGGTAGAATTCACTG	miRNA	ssc-miR-183	mature	known	templated	pig	23	26939	0	23	0	1	mature	mature	3	0	1	0
TATGGCACTGGTAGAATTCACTGT	miRNA	ssc-miR-183	mature	known	templated	pig	24	550	0	23	1	0	three_temp	three_prime	16	0	0	0
TATGGCACTGGTAGAATTCACTT	miRNA	ssc-miR-183	mature	known	non-templated	pig	23	384	0	22	1	0	three_non-temp	three_prime	20	0	0	0
TATGGCTTTTTATTCCTATGTG	miRNA	ssc-miR-135	mature	known	templated	pig	22	550	0	22	1	0	three_temp	three_prime	1	1	1	0
TATGTGCCTTTGGACTACATCG	miRNA	ssc-miR-455-5p	mature	known	templated	pig	22	1768	0	22	0	1	mature	mature	2	0	1	0
TATGTGCCTTTGGACTACATCGC	miRNA	ssc-miR-455-5p	mature	known	non-templated	pig	23	818	0	22	1	0	three_non-temp	three_prime	4	0	1	0
TATGTGCCTTTGGACTACATCGT	miRNA	ssc-miR-455-5p	mature	known	templated	pig	23	3676	0	22	1	0	three_temp	three_prime	1	1	1	0
TATGTGCCTTTGGACTACATCGTG	miRNA	ssc-miR-455-5p	mature	known	templated	pig	24	1422	0	22	2	0	three_temp	three_prime	3	0	1	0
TATTGCACATTACTAAGTTGC	miRNA	ssc-miR-32	mature	known	templated	pig	21	833	0	21	0	1	mature	mature	3	0	1	0
TATTGCACATTACTAAGTTGCA	miRNA	ssc-miR-32	mature	known	templated	pig	22	6209	0	21	1	0	three_temp	three_prime	1	1	1	0
TATTGCACTCGTCCCGGCC	miRNA	ssc-miR-92b-3p	mature	known	templated	pig	19	548	0	19	3	0	three_temp	three_prime	14	0	0	0
TATTGCACTCGTCCCGGCCT	miRNA	ssc-miR-92b-3p	mature	known	templated	pig	20	1437	0	20	2	0	three_temp	three_prime	7	0	0	0
TATTGCACTCGTCCCGGCCTC	miRNA	ssc-miR-92b-3p	mature	known	templated	pig	21	2639	0	21	1	0	three_temp	three_prime	3	0	1	0
TATTGCACTCGTCCCGGCCTCA	miRNA	ssc-miR-92b-3p	mature	known	non-templated	pig	22	2201	0	21	1	0	three_non-temp	three_prime	5	0	1	0
TATTGCACTCGTCCCGGCCTCAA	miRNA	ssc-miR-92b-3p	mature	known	non-templated	pig	23	468	0	21	2	0	three_non-temp	three_prime	17	0	0	0
TATTGCACTCGTCCCGGCCTCAAT	miRNA	ssc-miR-92b-3p	mature	known	non-templated	pig	24	575	0	21	3	0	three_non-temp	three_prime	13	0	0	0
TATTGCACTCGTCCCGGCCTCAT	miRNA	ssc-miR-92b-3p	mature	known	non-templated	pig	23	383	0	21	2	0	three_non-temp	three_prime	20	0	0	0
TATTGCACTCGTCCCGGCCTCC	miRNA	ssc-miR-92b-3p	mature	known	templated	pig	22	13900	0	22	0	1	mature	mature	1	1	1	0
TATTGCACTCGTCCCGGCCTCCA	miRNA	ssc-miR-92b-3p	mature	known	non-templated	pig	23	1086	0	22	1	0	three_non-temp	three_prime	9	0	0	0
TATTGCACTCGTCCCGGCCTCCAAT	miRNA	ssc-miR-92b-3p	mature	known	non-templated	pig	25	742	0	22	3	0	three_non-temp	three_prime	12	0	0	0
TATTGCACTCGTCCCGGCCTCCAT	miRNA	ssc-miR-92b-3p	mature	known	non-templated	pig	24	831	0	22	2	0	three_non-temp	three_prime	11	0	0	0
TATTGCACTCGTCCCGGCCTCCATT	miRNA	ssc-miR-92b-3p	mature	known	non-templated	pig	25	481	0	22	3	0	three_non-temp	three_prime	16	0	0	0
TATTGCACTCGTCCCGGCCTCCT	miRNA	ssc-miR-92b-3p	mature	known	non-templated	pig	23	1577	0	22	1	0	three_non-temp	three_prime	6	0	0	0
TATTGCACTCGTCCCGGCCTCCTT	miRNA	ssc-miR-92b-3p	mature	known	non-templated	pig	24	389	0	22	2	0	three_non-temp	three_prime	19	0	0	0
TATTGCACTCGTCCCGGCCTCG	miRNA	ssc-miR-92b-3p	mature	known	non-templated	pig	22	318	0	21	1	0	three_non-temp	three_prime	22	0	0	0
TATTGCACTCGTCCCGGCCTCT	miRNA	ssc-miR-92b-3p	mature	known	non-templated	pig	22	7824	0	21	1	0	three_non-temp	three_prime	2	0	1	0
TATTGCACTCGTCCCGGCCTT	miRNA	ssc-miR-92b-3p	mature	known	non-templated	pig	21	994	0	20	2	0	three_non-temp	three_prime	10	0	0	0
TATTGCACTTGTCCCGGCC	miRNA	ssc-miR-92a	mature	known	templated	pig	19	1590	0	19	3	0	three_temp	three_prime	20	0	0	0
TATTGCACTTGTCCCGGCCT	miRNA	ssc-miR-92a	mature	known	templated	pig	20	1385	0	20	2	0	three_temp	three_prime	23	0	0	0
TATTGCACTTGTCCCGGCCTA	miRNA	ssc-miR-92a	mature	known	non-templated	pig	21	1106	0	20	2	0	three_non-temp	three_prime	28	0	0	0
TATTGCACTTGTCCCGGCCTG	miRNA	ssc-miR-92a	mature	known	templated	pig	21	16453	0	21	1	0	three_temp	three_prime	6	0	0	0
TATTGCACTTGTCCCGGCCTGA	miRNA	ssc-miR-92a	mature	known	non-templated	pig	22	12249	0	21	1	0	three_non-temp	three_prime	7	0	0	0
TATTGCACTTGTCCCGGCCTGC	miRNA	ssc-miR-92a	mature	known	non-templated	pig	22	109795	0	21	1	0	three_non-temp	three_prime	2	0	1	0
TATTGCACTTGTCCCGGCCTGG	miRNA	ssc-miR-92a	mature	known	non-templated	pig	22	11644	0	21	1	0	three_non-temp	three_prime	9	0	0	0
TATTGCACTTGTCCCGGCCTGT	miRNA	ssc-miR-92a	mature	known	templated	pig	22	480996	0	22	0	1	mature	mature	1	1	1	0
TATTGCACTTGTCCCGGCCTGTA	miRNA	ssc-miR-92a	mature	known	non-templated	pig	23	50593	0	22	1	0	three_non-temp	three_prime	4	0	1	0
TATTGCACTTGTCCCGGCCTGTAA	miRNA	ssc-miR-92a	mature	known	non-templated	pig	24	5477	0	22	2	0	three_non-temp	three_prime	10	0	0	0
TATTGCACTTGTCCCGGCCTGTAAA	miRNA	ssc-miR-92a	mature	known	non-templated	pig	25	2803	0	22	3	0	three_non-temp	three_prime	16	0	0	0
TATTGCACTTGTCCCGGCCTGTAAAT	miRNA	ssc-miR-92a	mature	known	non-templated	pig	26	518	0	22	4	0	three_non-temp	three_prime	36	0	0	0
TATTGCACTTGTCCCGGCCTGTAAC	miRNA	ssc-miR-92a	mature	known	non-templated	pig	25	1069	0	22	3	0	three_non-temp	three_prime	29	0	0	0
TATTGCACTTGTCCCGGCCTGTAAG	miRNA	ssc-miR-92a	mature	known	non-templated	pig	25	553	0	22	3	0	three_non-temp	three_prime	35	0	0	0
TATTGCACTTGTCCCGGCCTGTAAT	miRNA	ssc-miR-92a	mature	known	non-templated	pig	25	5094	0	22	3	0	three_non-temp	three_prime	11	0	0	0
TATTGCACTTGTCCCGGCCTGTAC	miRNA	ssc-miR-92a	mature	known	non-templated	pig	24	1261	0	22	2	0	three_non-temp	three_prime	25	0	0	0
TATTGCACTTGTCCCGGCCTGTACA	miRNA	ssc-miR-92a	mature	known	non-templated	pig	25	734	0	22	3	0	three_non-temp	three_prime	32	0	0	0
TATTGCACTTGTCCCGGCCTGTAG	miRNA	ssc-miR-92a	mature	known	non-templated	pig	24	1559	0	22	2	0	three_non-temp	three_prime	21	0	0	0
TATTGCACTTGTCCCGGCCTGTAGA	miRNA	ssc-miR-92a	mature	known	non-templated	pig	25	778	0	22	3	0	three_non-temp	three_prime	30	0	0	0
TATTGCACTTGTCCCGGCCTGTAT	miRNA	ssc-miR-92a	mature	known	non-templated	pig	24	2109	0	22	2	0	three_non-temp	three_prime	18	0	0	0
TATTGCACTTGTCCCGGCCTGTC	miRNA	ssc-miR-92a	mature	known	non-templated	pig	23	1116	0	22	1	0	three_non-temp	three_prime	26	0	0	0
TATTGCACTTGTCCCGGCCTGTG	miRNA	ssc-miR-92a	mature	known	templated	pig	23	1864	0	22	1	0	three_temp	three_prime	19	0	0	0
TATTGCACTTGTCCCGGCCTGTGA	miRNA	ssc-miR-92a	mature	known	non-templated	pig	24	1390	0	22	2	0	three_non-temp	three_prime	22	0	0	0
TATTGCACTTGTCCCGGCCTGTT	miRNA	ssc-miR-92a	mature	known	templated	pig	23	5057	0	22	1	0	three_temp	three_prime	12	0	0	0
TATTGCACTTGTCCCGGCCTGTTT	miRNA	ssc-miR-92a	mature	known	non-templated	pig	24	362	0	22	2	0	three_non-temp	three_prime	41	0	0	0
TATTGCACTTGTCCCGGCCTT	miRNA	ssc-miR-92a	mature	known	non-templated	pig	21	387	0	20	2	0	three_non-temp	three_prime	40	0	0	0
TATTGCACTTGTCCCGGCT	miRNA	ssc-miR-92a	mature	known	non-templated	pig	19	577	0	18	4	0	three_non-temp	three_prime	34	0	0	0
TCAAACTGTGGGGGCACTTT	miRNA	ssc-miR-371-5p	mature	known	templated	pig	20	1021	2	20	0	0	five_temp	five_prime	90	0	0	0
TCAAACTGTGGGGGCACTTTC	miRNA	ssc-miR-371-5p	mature	known	templated	pig	21	1354	-2	20	1	0	both_temp	both	83	0	0	0
TCAAAGTGCTTACAGTGCAGGTAG	miRNA	ssc-miR-17-5p	mature	known	templated	pig	24	1508	1	23	0	0	five_temp	five_prime	5	0	1	0
TCAACACTTGCTGGTTTCCTCT	miRNA	ssc-miR-505	mature	known	templated	pig	22	600	0	22	0	1	mature	mature	3	0	1	0
TCAACAGACATTAATTGGGCGC	miRNA	ssc-miR-421-3p	mature	known	templated	pig	22	735	1	22	0	0	five_temp	five_prime	3	0	1	0
TCAAGTAATCCAGGATAGGC	miRNA	ssc-miR-26a	mature	known	templated	pig	20	517	-1	20	-1	0	both_temp	both	21	0	0	0
TCAAGTAATCCAGGATAGGCA	miRNA	ssc-miR-26a	mature	known	non-templated	pig	21	2379	-1	20	1	0	both_non-temp	both	10	0	0	0
TCAAGTAATCCAGGATAGGCC	miRNA	ssc-miR-26a	mature	known	non-templated	pig	21	10940	-1	20	1	0	both_non-temp	both	5	0	1	0
TCAAGTAATCCAGGATAGGCG	miRNA	ssc-miR-26a	mature	known	non-templated	pig	21	1682	-1	20	1	0	both_non-temp	both	11	0	0	0
TCAAGTAATCCAGGATAGGCT	miRNA	ssc-miR-26a	mature	known	templated	pig	21	45133	1	21	0	0	five_temp	five_prime	3	0	1	0
TCAAGTAATCCAGGATAGGCTG	miRNA	ssc-miR-26a	mature	known	templated	pig	22	420	-1	21	1	0	both_temp	both	23	0	0	0
TCAAGTAATCCAGGATAGGCTT	miRNA	ssc-miR-26a	mature	known	non-templated	pig	22	783	-1	21	1	0	both_non-temp	both	18	0	0	0
TCAAGTAATTCAGGATAGGT	miRNA	bta-miR-26b	mature	novel	templated	cattle	20	1372	-1	20	-1	0	both_temp	both	7	0	0	0
TCAAGTAATTCAGGATAGGTC	miRNA	bta-miR-26b	mature	novel	non-templated	cattle	21	551	-1	20	1	0	both_non-temp	both	9	0	0	0
TCAAGTAATTCAGGATAGGTT	miRNA	bta-miR-26b	mature	novel	templated	cattle	21	2892	1	21	0	0	five_temp	five_prime	4	0	1	0
TCACAGTGAACCGGTCTCT	miRNA	ssc-miR-128	mature	known	templated	pig	19	1058	0	19	2	0	three_temp	three_prime	27	0	0	0
TCACAGTGAACCGGTCTCTC	miRNA	ssc-miR-128	mature	known	non-templated	pig	20	1539	0	19	2	0	three_non-temp	three_prime	24	0	0	0
TCACAGTGAACCGGTCTCTT	miRNA	ssc-miR-128	mature	known	templated	pig	20	8288	0	20	1	0	three_temp	three_prime	11	0	0	0
TCACAGTGAACCGGTCTCTTA	miRNA	ssc-miR-128	mature	known	non-templated	pig	21	5194	0	20	1	0	three_non-temp	three_prime	16	0	0	0
TCACAGTGAACCGGTCTCTTAA	miRNA	ssc-miR-128	mature	known	non-templated	pig	22	2004	0	20	2	0	three_non-temp	three_prime	21	0	0	0
TCACAGTGAACCGGTCTCTTAT	miRNA	ssc-miR-128	mature	known	non-templated	pig	22	493	0	20	2	0	three_non-temp	three_prime	36	0	0	0
TCACAGTGAACCGGTCTCTTC	miRNA	ssc-miR-128	mature	known	non-templated	pig	21	44888	0	20	1	0	three_non-temp	three_prime	5	0	1	0
TCACAGTGAACCGGTCTCTTG	miRNA	ssc-miR-128	mature	known	non-templated	pig	21	2292	0	20	1	0	three_non-temp	three_prime	20	0	0	0
TCACAGTGAACCGGTCTCTTT	miRNA	ssc-miR-128	mature	known	templated	pig	21	259134	0	21	0	1	mature	mature	1	1	1	0
TCACAGTGAACCGGTCTCTTTA	miRNA	ssc-miR-128	mature	known	non-templated	pig	22	38280	0	21	1	0	three_non-temp	three_prime	6	0	0	0
TCACAGTGAACCGGTCTCTTTAA	miRNA	ssc-miR-128	mature	known	non-templated	pig	23	15779	0	21	2	0	three_non-temp	three_prime	8	0	0	0
TCACAGTGAACCGGTCTCTTTAAA	miRNA	ssc-miR-128	mature	known	non-templated	pig	24	1769	0	21	3	0	three_non-temp	three_prime	22	0	0	0
TCACAGTGAACCGGTCTCTTTAC	miRNA	ssc-miR-128	mature	known	non-templated	pig	23	897	0	21	2	0	three_non-temp	three_prime	30	0	0	0
TCACAGTGAACCGGTCTCTTTAG	miRNA	ssc-miR-128	mature	known	non-templated	pig	23	1203	0	21	2	0	three_non-temp	three_prime	26	0	0	0
TCACAGTGAACCGGTCTCTTTAT	miRNA	ssc-miR-128	mature	known	non-templated	pig	23	3638	0	21	2	0	three_non-temp	three_prime	18	0	0	0
TCACAGTGAACCGGTCTCTTTC	miRNA	ssc-miR-128	mature	known	templated	pig	22	94185	0	21	1	0	three_temp	three_prime	2	0	1	0
TCACAGTGAACCGGTCTCTTTCA	miRNA	ssc-miR-128	mature	known	non-templated	pig	23	7673	0	21	2	0	three_non-temp	three_prime	13	0	0	0
TCACAGTGAACCGGTCTCTTTCAA	miRNA	ssc-miR-128	mature	known	non-templated	pig	24	833	0	21	3	0	three_non-temp	three_prime	31	0	0	0
TCACAGTGAACCGGTCTCTTTCC	miRNA	ssc-miR-128	mature	known	templated	pig	23	2872	0	21	2	0	three_temp	three_prime	19	0	0	0
TCACAGTGAACCGGTCTCTTTCG	miRNA	ssc-miR-128	mature	known	non-templated	pig	23	753	0	21	2	0	three_non-temp	three_prime	33	0	0	0
TCACAGTGAACCGGTCTCTTTCT	miRNA	ssc-miR-128	mature	known	non-templated	pig	23	7938	0	21	2	0	three_non-temp	three_prime	12	0	0	0
TCACAGTGAACCGGTCTCTTTCTT	miRNA	ssc-miR-128	mature	known	non-templated	pig	24	792	0	21	3	0	three_non-temp	three_prime	32	0	0	0
TCACAGTGAACCGGTCTCTTTG	miRNA	ssc-miR-128	mature	known	non-templated	pig	22	1412	0	21	1	0	three_non-temp	three_prime	25	0	0	0
TCACAGTGAACCGGTCTCTTTT	miRNA	ssc-miR-128	mature	known	templated	pig	22	52074	0	21	1	0	three_temp	three_prime	3	0	1	0
TCACAGTGAACCGGTCTCTTTTA	miRNA	ssc-miR-128	mature	known	non-templated	pig	23	3895	0	21	2	0	three_non-temp	three_prime	17	0	0	0
TCACAGTGAACCGGTCTCTTTTAA	miRNA	ssc-miR-128	mature	known	non-templated	pig	24	685	0	21	3	0	three_non-temp	three_prime	34	0	0	0
TCACAGTGAACCGGTCTCTTTTC	miRNA	ssc-miR-128	mature	known	non-templated	pig	23	1031	0	21	2	0	three_non-temp	three_prime	28	0	0	0
TCACAGTGAACCGGTCTCTTTTT	miRNA	ssc-miR-128	mature	known	templated	pig	23	6254	0	21	2	0	three_temp	three_prime	15	0	0	0
TCACAGTGAACCGGTCTCTTTTTT	miRNA	ssc-miR-128	mature	known	non-templated	pig	24	560	0	21	3	0	three_non-temp	three_prime	35	0	0	0
TCACAGTGGCTAAGTTCC	miRNA	ssc-miR-27a	mature	known	templated	pig	18	870	-1	18	-2	0	both_temp	both	7	0	0	0
TCACAGTGGCTAAGTTCCG	miRNA	ssc-miR-27a	mature	known	templated	pig	19	1129	-1	19	-1	0	both_temp	both	5	0	1	0
TCACAGTGGCTAAGTTCCGA	miRNA	ssc-miR-27a	mature	known	non-templated	pig	20	551	-1	19	1	0	both_non-temp	both	12	0	0	0
TCACAGTGGCTAAGTTCT	miRNA	ssc-miR-27b-3p	mature	known	templated	pig	18	3486	-1	18	-2	0	both_temp	both	7	0	0	0
TCACAGTGGCTAAGTTCTG	miRNA	ssc-miR-27b-3p	mature	known	templated	pig	19	4019	-1	19	-1	0	both_temp	both	6	0	0	0
TCACAGTGGCTAAGTTCTGA	miRNA	ssc-miR-27b-3p	mature	known	non-templated	pig	20	415	-1	19	1	0	both_non-temp	both	18	0	0	0
TCACAGTGGCTAAGTTCTGC	miRNA	ssc-miR-27b-3p	mature	known	templated	pig	20	3443	1	20	0	0	five_temp	five_prime	8	0	0	0
TCACAGTGGCTAAGTTCTGCA	miRNA	ssc-miR-27b-3p	mature	known	templated	pig	21	1021	-1	20	1	0	both_temp	both	12	0	0	0
TCACAGTGGCTAAGTTCTGT	miRNA	ssc-miR-27b-3p	mature	known	non-templated	pig	20	1016	-1	19	1	0	both_non-temp	both	13	0	0	0
TCACTAACCACACGGCCAGG	miRNA	hsa-miR-34c-3p	mature	novel	templated	human	20	605	2	20	0	0	five_temp	five_prime	3	0	1	0
TCAGGCTCAGTCCCCTCCCGA	miRNA	bta-miR-484	mature	novel	templated	cattle	21	516	0	21	1	0	three_temp	three_prime	8	0	0	0
TCAGGCTCAGTCCCCTCCCGAA	miRNA	bta-miR-484	mature	novel	non-templated	cattle	22	1694	0	21	1	0	three_non-temp	three_prime	5	0	1	0
TCAGGCTCAGTCCCCTCCCGAAA	miRNA	bta-miR-484	mature	novel	non-templated	cattle	23	1029	0	21	2	0	three_non-temp	three_prime	7	0	0	0
TCAGGCTCAGTCCCCTCCCGAC	miRNA	bta-miR-484	mature	novel	non-templated	cattle	22	1733	0	21	1	0	three_non-temp	three_prime	3	0	1	0
TCAGGCTCAGTCCCCTCCCGAT	miRNA	bta-miR-484	mature	novel	templated	cattle	22	8561	0	22	0	1	mature	mature	1	1	1	0
TCAGGCTCAGTCCCCTCCCGATA	miRNA	bta-miR-484	mature	novel	templated	cattle	23	2045	0	22	1	0	three_temp	three_prime	2	0	1	0
TCAGGCTCAGTCCCCTCCCGATT	miRNA	bta-miR-484	mature	novel	non-templated	cattle	23	1137	0	22	1	0	three_non-temp	three_prime	6	0	0	0
TCAGTGCACTACAGAACT	miRNA	ssc-miR-148a-3p	mature	known	templated	pig	18	838	0	18	4	0	three_temp	three_prime	14	0	0	0
TCAGTGCACTACAGAACTTTG	miRNA	ssc-miR-148a-3p	mature	known	templated	pig	21	1023	0	21	1	0	three_temp	three_prime	12	0	0	0
TCAGTGCACTACAGAACTTTGA	miRNA	ssc-miR-148a-3p	mature	known	non-templated	pig	22	4709	0	21	1	0	three_non-temp	three_prime	7	0	0	0
TCAGTGCACTACAGAACTTTGC	miRNA	ssc-miR-148a-3p	mature	known	non-templated	pig	22	61037	0	21	1	0	three_non-temp	three_prime	2	0	1	0
TCAGTGCACTACAGAACTTTGG	miRNA	ssc-miR-148a-3p	mature	known	non-templated	pig	22	6055	0	21	1	0	three_non-temp	three_prime	5	0	1	0
TCAGTGCACTACAGAACTTTGT	miRNA	ssc-miR-148a-3p	mature	known	templated	pig	22	289494	0	22	0	1	mature	mature	1	1	1	0
TCAGTGCACTACAGAACTTTGTA	miRNA	ssc-miR-148a-3p	mature	known	non-templated	pig	23	5099	0	22	1	0	three_non-temp	three_prime	6	0	0	0
TCAGTGCACTACAGAACTTTGTC	miRNA	ssc-miR-148a-3p	mature	known	templated	pig	23	797	0	22	1	0	three_temp	three_prime	15	0	0	0
TCAGTGCACTACAGAACTTTGTT	miRNA	ssc-miR-148a-3p	mature	known	non-templated	pig	23	1196	0	22	1	0	three_non-temp	three_prime	11	0	0	0
TCAGTGCATCACAGAACTTTG	miRNA	ssc-miR-148b-3p	mature	known	templated	pig	21	1422	0	21	1	0	three_temp	three_prime	6	0	0	0
TCAGTGCATCACAGAACTTTGC	miRNA	ssc-miR-148b-3p	mature	known	non-templated	pig	22	2542	0	21	1	0	three_non-temp	three_prime	4	0	1	0
TCAGTGCATCACAGAACTTTGT	miRNA	ssc-miR-148b-3p	mature	known	templated	pig	22	13046	0	22	0	1	mature	mature	1	1	1	0
TCAGTGCATCACAGAACTTTGTA	miRNA	ssc-miR-148b-3p	mature	known	non-templated	pig	23	4110	0	22	1	0	three_non-temp	three_prime	3	0	1	0
TCAGTGCATCACAGAACTTTGTC	miRNA	ssc-miR-148b-3p	mature	known	templated	pig	23	1009	0	22	1	0	three_temp	three_prime	7	0	0	0
TCAGTGCATCACAGAACTTTGTG	miRNA	ssc-miR-148b-3p	mature	known	non-templated	pig	23	512	0	22	1	0	three_non-temp	three_prime	10	0	0	0
TCAGTGCATCACAGAACTTTGTT	miRNA	ssc-miR-148b-3p	mature	known	non-templated	pig	23	5139	0	22	1	0	three_non-temp	three_prime	2	0	1	0
TCAGTGCATGACAGAACTTGG	miRNA	ssc-miR-152	mature	known	templated	pig	21	2716	0	21	0	1	mature	mature	2	0	1	0
TCAGTGCATGACAGAACTTGGA	miRNA	ssc-miR-152	mature	known	non-templated	pig	22	1408	0	21	1	0	three_non-temp	three_prime	3	0	1	0
TCAGTGCATGACAGAACTTGGC	miRNA	ssc-miR-152	mature	known	non-templated	pig	22	892	0	21	1	0	three_non-temp	three_prime	4	0	1	0
TCCCACTTCTGACACCA	miRNA	bta-miR-2478	mature	novel	templated	cattle	17	4125	3	17	0	0	five_temp	five_prime	2	0	1	0
TCCCCCAGGTGTGATTCTGATTTG	miRNA	ssc-miR-361-3p	mature	known	templated	pig	24	830	1	23	1	0	both_temp	both	4	0	1	0
TCCCCCAGGTGTGATTCTGATTTGC	miRNA	ssc-miR-361-3p	mature	known	templated	pig	25	1085	1	24	0	0	five_temp	five_prime	2	0	1	0
TCCCCCAGGTGTGATTCTGATTTGT	miRNA	ssc-miR-361-3p	mature	known	non-templated	pig	25	431	1	23	1	0	both_non-temp	both	6	0	0	0
TCCCTGAGACCCTAACTTG	miRNA	ssc-miR-125b	mature	known	templated	pig	19	610	0	19	3	0	three_temp	three_prime	5	0	1	0
TCCCTGAGACCCTAACTTGT	miRNA	ssc-miR-125b	mature	known	templated	pig	20	1081	0	20	2	0	three_temp	three_prime	3	0	1	0
TCCCTGAGACCCTAACTTGTG	miRNA	ssc-miR-125b	mature	known	templated	pig	21	1396	0	21	1	0	three_temp	three_prime	2	0	1	0
TCCCTGAGACCCTAACTTGTGA	miRNA	ssc-miR-125b	mature	known	templated	pig	22	2579	0	22	0	1	mature	mature	1	1	1	0
TCCCTGAGACCCTAACTTGTGAA	miRNA	ssc-miR-125b	mature	known	non-templated	pig	23	740	0	22	1	0	three_non-temp	three_prime	4	0	1	0
TCCCTGAGACCCTAACTTGTGAAA	miRNA	ssc-miR-125b	mature	known	non-templated	pig	24	306	0	22	2	0	three_non-temp	three_prime	8	0	0	0
TCCCTGAGACCCTAACTTGTGT	miRNA	ssc-miR-125b	mature	known	non-templated	pig	22	395	0	21	1	0	three_non-temp	three_prime	7	0	0	0
TCCCTGAGACCCTTTAACCTG	miRNA	ssc-miR-125a	mature	known	templated	pig	21	882	0	21	2	0	three_temp	three_prime	7	0	0	0
TCCCTGAGACCCTTTAACCTGC	miRNA	ssc-miR-125a	mature	known	non-templated	pig	22	1060	0	21	2	0	three_non-temp	three_prime	5	0	1	0
TCCCTGAGACCCTTTAACCTGT	miRNA	ssc-miR-125a	mature	known	templated	pig	22	4684	0	22	1	0	three_temp	three_prime	2	0	1	0
TCCCTGAGACCCTTTAACCTGTA	miRNA	ssc-miR-125a	mature	known	non-templated	pig	23	414	0	22	1	0	three_non-temp	three_prime	9	0	0	0
TCCCTGAGACCCTTTAACCTGTG	miRNA	ssc-miR-125a	mature	known	templated	pig	23	5535	0	23	0	1	mature	mature	1	1	1	0
TCCCTGAGACCCTTTAACCTGTGA	miRNA	ssc-miR-125a	mature	known	templated	pig	24	2007	0	23	1	0	three_temp	three_prime	3	0	1	0
TCCCTGAGACCCTTTAACCTGTGT	miRNA	ssc-miR-125a	mature	known	non-templated	pig	24	1324	0	23	1	0	three_non-temp	three_prime	4	0	1	0
TCCCTGTCCTCCAGGAGCTC	miRNA	ssc-miR-339-5p	mature	known	templated	pig	20	486	0	20	2	0	three_temp	three_prime	5	0	1	0
TCCCTGTCCTCCAGGAGCTCA	miRNA	ssc-miR-339-5p	mature	known	templated	pig	21	476	0	21	1	0	three_temp	three_prime	6	0	0	0
TCCCTGTCCTCCAGGAGCTCAC	miRNA	ssc-miR-339-5p	mature	known	templated	pig	22	4385	0	22	0	1	mature	mature	1	1	1	0
TCCCTGTCCTCCAGGAGCTCACA	miRNA	ssc-miR-339-5p	mature	known	non-templated	pig	23	1278	0	22	1	0	three_non-temp	three_prime	2	0	1	0
TCCCTGTCCTCCAGGAGCTCACC	miRNA	ssc-miR-339-5p	mature	known	non-templated	pig	23	719	0	22	1	0	three_non-temp	three_prime	4	0	1	0
TCCCTGTCCTCCAGGAGCTCACG	miRNA	ssc-miR-339-5p	mature	known	templated	pig	23	319	0	22	1	0	three_temp	three_prime	8	0	0	0
TCCCTGTCCTCCAGGAGCTCACT	miRNA	ssc-miR-339-5p	mature	known	templated	pig	23	470	0	22	1	0	three_temp	three_prime	7	0	0	0
TCCCTGTCCTCCAGGAGCTCAT	miRNA	ssc-miR-339	mature	known	templated	pig	22	527	0	21	1	0	three_temp	three_prime	1	1	1	0
TCCCTTTGTCATCCTATGCCT	miRNA	ssc-miR-204	mature	known	templated	pig	21	415	1	21	0	0	five_temp	five_prime	4	0	1	0
TCCGTCTCAGTTACTTTATAGC	miRNA	bta-miR-340	mature	novel	templated	cattle	22	403	0	22	1	0	three_temp	three_prime	2	0	1	0
TCCGTCTCAGTTACTTTATAGCC	miRNA	bta-miR-340	mature	novel	templated	cattle	23	716	0	23	0	1	mature	mature	1	1	1	0
TCCTGACTCCAGGTCCTGTG	miRNA	hsa-miR-378a-5p	mature	novel	templated	human	20	622	-1	20	-1	0	both_temp	both	5	0	1	0
TCCTGACTCCAGGTCCTGTGT	miRNA	hsa-miR-378a-5p	mature	novel	templated	human	21	753	1	21	0	0	five_temp	five_prime	4	0	1	0
TCCTGGGGCCCGCACTCTCGC	miRNA	ssc-miR-1343	mature	known	templated	pig	21	559	1	21	0	0	five_temp	five_prime	4	0	1	0
TCCTTCATTCCACCGGAGTCTG	miRNA	ssc-miR-205	mature	known	templated	pig	22	526	0	22	0	1	mature	mature	3	0	1	0
TCCTTCATTCCACCGGAGTCTGT	miRNA	ssc-miR-205	mature	known	templated	pig	23	1325	0	22	1	0	three_temp	three_prime	2	0	1	0
TCGACCGGACCTCGACC	miRNA	hsa-miR-1307-5p	mature	novel	templated	human	17	1048	0	17	4	0	three_temp	three_prime	2	0	1	0
TCGACCGGACCTCGACCG	miRNA	hsa-miR-1307-5p	mature	novel	templated	human	18	814	0	18	3	0	three_temp	three_prime	3	0	1	0
TCGACCGGACCTCGACCGGCT	miRNA	hsa-miR-1307-5p	mature	novel	templated	human	21	1504	0	21	0	1	mature	mature	1	1	1	0
TCGAGGAGCTCACAGTCTAGT	miRNA	ssc-miR-151-5p	mature	known	templated	pig	21	900	0	21	0	1	mature	mature	2	0	1	0
TCGAGGAGCTCACAGTCTAGTA	miRNA	ssc-miR-151-5p	mature	known	templated	pig	22	1792	0	21	1	0	three_temp	three_prime	1	1	1	0
TCGATGATGGTCCCTGTGTTTG	miRNA	ssc-miR-2320-3p	mature	known	templated	pig	22	2211	1	21	0	0	five_temp	five_prime	1	1	1	0
TCGGATCCGTCTGAGCTTGGCT	miRNA	ssc-miR-127	mature	known	templated	pig	22	531	0	22	0	1	mature	mature	1	1	1	0
TCGGCGTGGCGTCGGTCGT	miRNA	ssc-miR-1307	mature	known	templated	pig	19	690	-2	19	-1	0	both_temp	both	24	0	0	0
TCGGCGTGGCGTCGGTCGTG	miRNA	ssc-miR-1307	mature	known	templated	pig	20	1876	2	20	0	0	five_temp	five_prime	15	0	0	0
TCGGCGTGGCGTCGGTCGTGA	miRNA	ssc-miR-1307	mature	known	non-templated	pig	21	1184	-2	20	1	0	both_non-temp	both	17	0	0	0
TCGGCGTGGCGTCGGTCGTGC	miRNA	ssc-miR-1307	mature	known	non-templated	pig	21	503	-2	20	1	0	both_non-temp	both	26	0	0	0
TCGGCGTGGCGTCGGTCGTGG	miRNA	ssc-miR-1307	mature	known	templated	pig	21	12811	-2	20	1	0	both_temp	both	5	0	1	0
TCGGCGTGGCGTCGGTCGTGT	miRNA	ssc-miR-1307	mature	known	non-templated	pig	21	806	-2	20	1	0	both_non-temp	both	23	0	0	0
TCGTACCGTGAGTAATAATGCG	miRNA	ssc-miR-126-3p	mature	known	templated	pig	22	1615	0	22	0	1	mature	mature	1	1	1	0
TCTACAGTGCACGTGTCTCCAGT	miRNA	ssc-miR-139-5p	mature	known	templated	pig	23	599	0	22	1	0	three_temp	three_prime	1	1	1	0
TCTCCCAACCCTTGTACCAGT	miRNA	ssc-miR-150	mature	known	templated	pig	21	365	0	21	1	0	three_temp	three_prime	2	0	1	0
TCTCCCAACCCTTGTACCAGTG	miRNA	ssc-miR-150	mature	known	templated	pig	22	1706	0	22	0	1	mature	mature	1	1	1	0
TCTCTGGGCCTGTGTCTTAGGCT	miRNA	hsa-miR-330-5p	mature	novel	templated	human	23	682	0	22	1	0	three_temp	three_prime	1	1	1	0
TCTGGACTTGGAGTCAGAAGG	miRNA	bta-miR-378d	mature	novel	non-templated	cattle	21	10667	1	19	3	0	both_non-temp	both	2	0	1	0
TCTGGCTCCGTGTCTTCACTC	miRNA	ssc-miR-149	mature	known	templated	pig	21	716	0	21	2	0	three_temp	three_prime	4	0	1	0
TCTGGCTCCGTGTCTTCACTCC	miRNA	ssc-miR-149	mature	known	templated	pig	22	897	0	22	1	0	three_temp	three_prime	2	0	1	0
TCTGGCTCCGTGTCTTCACTCCC	miRNA	ssc-miR-149	mature	known	templated	pig	23	2174	0	23	0	1	mature	mature	1	1	1	0
TCTGGCTCCGTGTCTTCACTCCT	miRNA	ssc-miR-149	mature	known	non-templated	pig	23	783	0	22	1	0	three_non-temp	three_prime	3	0	1	0
TCTTACTGGGCAGCATTGGA	miRNA	hsa-miR-200b-5p	mature	novel	templated	human	20	605	2	20	0	0	five_temp	five_prime	5	0	1	0
TCTTTGGTTATCTAGCTGTAT	miRNA	ssc-miR-9	mature	known	templated	pig	21	1230	0	21	1	0	three_temp	three_prime	2	0	1	0
TCTTTGGTTATCTAGCTGTATG	miRNA	ssc-miR-9	mature	known	templated	pig	22	4885	0	22	0	1	mature	mature	1	1	1	0
TCTTTGGTTATCTAGCTGTATGA	miRNA	ssc-miR-9-1	mature	known	templated	pig	23	2985	0	23	0	1	mature	mature	1	1	1	0
TCTTTGGTTATCTAGCTGTATGT	miRNA	ssc-miR-9	mature	known	non-templated	pig	23	666	0	22	1	0	three_non-temp	three_prime	4	0	1	0
TGAAATGTTTAGGACCAC	miRNA	hsa-miR-203a-3p	mature	novel	templated	human	18	502	-1	18	-3	0	both_temp	both	40	0	0	0
TGAAATGTTTAGGACCACA	miRNA	hsa-miR-203a-3p	mature	novel	non-templated	human	19	1068	-1	18	-3	0	both_non-temp	both	29	0	0	0
TGAAATGTTTAGGACCACC	miRNA	hsa-miR-203a-3p	mature	novel	non-templated	human	19	6413	-1	18	-3	0	both_non-temp	both	10	0	0	0
TGAAATGTTTAGGACCACG	miRNA	hsa-miR-203a-3p	mature	novel	non-templated	human	19	774	-1	18	-3	0	both_non-temp	both	34	0	0	0
TGAAATGTTTAGGACCACT	miRNA	hsa-miR-203a-3p	mature	novel	templated	human	19	29659	-1	19	-2	0	both_temp	both	4	0	1	0
TGAAATGTTTAGGACCACTA	miRNA	hsa-miR-203a-3p	mature	novel	templated	human	20	3879	-1	20	-1	0	both_temp	both	16	0	0	0
TGAAATGTTTAGGACCACTAA	miRNA	hsa-miR-203a-3p	mature	novel	non-templated	human	21	10899	-1	20	1	0	both_non-temp	both	7	0	0	0
TGAAATGTTTAGGACCACTAC	miRNA	hsa-miR-203a-3p	mature	novel	non-templated	human	21	4219	-1	20	1	0	both_non-temp	both	15	0	0	0
TGAAATGTTTAGGACCACTAG	miRNA	hsa-miR-203a-3p	mature	novel	templated	human	21	192531	1	21	0	0	five_temp	five_prime	1	1	1	0
TGAAATGTTTAGGACCACTAGA	miRNA	hsa-miR-203a-3p	mature	novel	templated	human	22	8661	-1	21	1	0	both_temp	both	9	0	0	0
TGAAATGTTTAGGACCACTAGC	miRNA	hsa-miR-203a-3p	mature	novel	non-templated	human	22	5582	-1	21	1	0	both_non-temp	both	12	0	0	0
TGAAATGTTTAGGACCACTAGG	miRNA	hsa-miR-203a-3p	mature	novel	non-templated	human	22	802	-1	21	1	0	both_non-temp	both	33	0	0	0
TGAAATGTTTAGGACCACTAGT	miRNA	hsa-miR-203a-3p	mature	novel	non-templated	human	22	24648	-1	21	1	0	both_non-temp	both	5	0	1	0
TGAAATGTTTAGGACCACTAT	miRNA	hsa-miR-203a-3p	mature	novel	non-templated	human	21	1330	-1	20	1	0	both_non-temp	both	25	0	0	0
TGACCTATGAATTGACAGCCAG	miRNA	bta-miR-192	mature	novel	templated	cattle	22	677	1	22	0	0	five_temp	five_prime	1	1	1	0
TGACCTCTGGTCTCCCGCCCTG	miRNA	ssc-miR-6782-3p	mature	known	templated	pig	22	843	0	22	0	1	mature	mature	1	1	1	0
TGACCTCTGGTCTCCCGCCCTGC	miRNA	ssc-miR-6782-3p	mature	known	templated	pig	23	502	0	22	1	0	three_temp	three_prime	2	0	1	0
TGACCTCTGGTCTCCCGCCCTGCT	miRNA	ssc-miR-6782-3p	mature	known	templated	pig	24	492	0	22	2	0	three_temp	three_prime	3	0	1	0
TGAGAACTGAATTCCATAGGCT	miRNA	ssc-miR-146b	mature	known	templated	pig	22	318	0	21	1	0	three_temp	three_prime	3	0	1	0
TGAGAACTGAATTCCATAGGCTG	miRNA	ssc-miR-146b	mature	known	templated	pig	23	1433	0	21	2	0	three_temp	three_prime	1	1	1	0
TGAGAACTGAATTCCATAGGCTGT	miRNA	ssc-miR-146b	mature	known	templated	pig	24	1141	0	21	3	0	three_temp	three_prime	2	0	1	0
TGAGACCTCTGGGTTCTGAGC	miRNA	ssc-miR-769-5p	mature	known	templated	pig	21	1197	0	21	0	1	mature	mature	2	0	1	0
TGAGACCTCTGGGTTCTGAGCC	miRNA	ssc-miR-769-5p	mature	known	non-templated	pig	22	688	0	21	1	0	three_non-temp	three_prime	3	0	1	0
TGAGACCTCTGGGTTCTGAGCT	miRNA	ssc-miR-769-5p	mature	known	templated	pig	22	2941	0	21	1	0	three_temp	three_prime	1	1	1	0
TGAGATGAAGCACTGTAGCT	miRNA	ssc-miR-143-3p	mature	known	templated	pig	20	453	0	20	1	0	three_temp	three_prime	7	0	0	0
TGAGATGAAGCACTGTAGCTC	miRNA	ssc-miR-143-3p	mature	known	templated	pig	21	4792	0	21	0	1	mature	mature	1	1	1	0
TGAGATGAAGCACTGTAGCTCA	miRNA	ssc-miR-143-3p	mature	known	templated	pig	22	278	0	21	1	0	three_temp	three_prime	9	0	0	0
TGAGATGAAGCACTGTAGCTCC	miRNA	ssc-miR-143-3p	mature	known	non-templated	pig	22	499	0	21	1	0	three_non-temp	three_prime	5	0	1	0
TGAGATGAAGCACTGTAGCTCG	miRNA	ssc-miR-143-3p	mature	known	templated	pig	22	478	0	21	1	0	three_temp	three_prime	6	0	0	0
TGAGATGAAGCACTGTAGCTCT	miRNA	ssc-miR-143-3p	mature	known	non-templated	pig	22	2134	0	21	1	0	three_non-temp	three_prime	2	0	1	0
TGAGATGAAGCACTGTAGCTT	miRNA	ssc-miR-143-3p	mature	known	non-templated	pig	21	721	0	20	1	0	three_non-temp	three_prime	4	0	1	0
TGAGGGGCAGAGAGCGAGA	miRNA	ssc-miR-423-5p	mature	known	templated	pig	19	825	0	19	4	0	three_temp	three_prime	12	0	0	0
TGAGGGGCAGAGAGCGAGAC	miRNA	ssc-miR-423-5p	mature	known	templated	pig	20	613	0	20	3	0	three_temp	three_prime	16	0	0	0
TGAGGGGCAGAGAGCGAGACA	miRNA	ssc-miR-423-5p	mature	known	non-templated	pig	21	493	0	20	3	0	three_non-temp	three_prime	17	0	0	0
TGAGGGGCAGAGAGCGAGACC	miRNA	ssc-miR-423-5p	mature	known	non-templated	pig	21	1746	0	20	3	0	three_non-temp	three_prime	9	0	0	0
TGAGGGGCAGAGAGCGAGACT	miRNA	ssc-miR-423-5p	mature	known	templated	pig	21	7374	0	21	2	0	three_temp	three_prime	3	0	1	0
TGAGGGGCAGAGAGCGAGACTC	miRNA	ssc-miR-423-5p	mature	known	non-templated	pig	22	1865	0	21	2	0	three_non-temp	three_prime	8	0	0	0
TGAGGGGCAGAGAGCGAGACTT	miRNA	ssc-miR-423-5p	mature	known	templated	pig	22	9656	0	22	1	0	three_temp	three_prime	2	0	1	0
TGAGGGGCAGAGAGCGAGACTTA	miRNA	ssc-miR-423-5p	mature	known	non-templated	pig	23	688	0	22	1	0	three_non-temp	three_prime	15	0	0	0
TGAGGGGCAGAGAGCGAGACTTC	miRNA	ssc-miR-423-5p	mature	known	non-templated	pig	23	5592	0	22	1	0	three_non-temp	three_prime	5	0	1	0
TGAGGGGCAGAGAGCGAGACTTG	miRNA	ssc-miR-423-5p	mature	known	non-templated	pig	23	310	0	22	1	0	three_non-temp	three_prime	19	0	0	0
TGAGGGGCAGAGAGCGAGACTTT	miRNA	ssc-miR-423-5p	mature	known	templated	pig	23	36336	0	23	0	1	mature	mature	1	1	1	0
TGAGGGGCAGAGAGCGAGACTTTA	miRNA	ssc-miR-423-5p	mature	known	non-templated	pig	24	731	0	23	1	0	three_non-temp	three_prime	14	0	0	0
TGAGGGGCAGAGAGCGAGACTTTC	miRNA	ssc-miR-423-5p	mature	known	non-templated	pig	24	436	0	23	1	0	three_non-temp	three_prime	18	0	0	0
TGAGGGGCAGAGAGCGAGACTTTT	miRNA	ssc-miR-423-5p	mature	known	templated	pig	24	4130	0	23	1	0	three_temp	three_prime	6	0	0	0
TGAGGTAGGAGGTTGTATAGC	miRNA	ssc-let-7e	mature	known	non-templated	pig	21	331	0	20	2	0	three_non-temp	three_prime	6	0	0	0
TGAGGTAGGAGGTTGTATAGT	miRNA	ssc-let-7e	mature	known	templated	pig	21	1546	0	21	1	0	three_temp	three_prime	2	0	1	0
TGAGGTAGGAGGTTGTATAGTC	miRNA	ssc-let-7e	mature	known	non-templated	pig	22	677	0	21	1	0	three_non-temp	three_prime	3	0	1	0
TGAGGTAGGAGGTTGTATAGTT	miRNA	ssc-let-7e	mature	known	templated	pig	22	3071	0	22	0	1	mature	mature	1	1	1	0
TGAGGTAGGAGGTTGTATAGTTT	miRNA	ssc-let-7e	mature	known	non-templated	pig	23	560	0	22	1	0	three_non-temp	three_prime	4	0	1	0
TGAGGTAGTAAGTTGTATTGT	miRNA	ssc-miR-98	mature	known	templated	pig	21	466	0	21	1	0	three_temp	three_prime	3	0	1	0
TGAGGTAGTAAGTTGTATTGTC	miRNA	ssc-miR-98	mature	known	non-templated	pig	22	554	0	21	1	0	three_non-temp	three_prime	2	0	1	0
TGAGGTAGTAAGTTGTATTGTT	miRNA	ssc-miR-98	mature	known	templated	pig	22	2666	0	22	0	1	mature	mature	1	1	1	0
TGAGGTAGTAGATTGTAC	miRNA	ssc-let-7f	mature	known	non-templated	pig	18	696	0	17	5	0	three_non-temp	three_prime	13	0	0	0
TGAGGTAGTAGATTGTAT	miRNA	ssc-let-7f	mature	known	templated	pig	18	3514	0	18	4	0	three_temp	three_prime	5	0	1	0
TGAGGTAGTAGATTGTATA	miRNA	ssc-let-7f	mature	known	templated	pig	19	392	0	19	3	0	three_temp	three_prime	19	0	0	0
TGAGGTAGTAGATTGTATAG	miRNA	ssc-let-7f	mature	known	templated	pig	20	1698	0	20	2	0	three_temp	three_prime	10	0	0	0
TGAGGTAGTAGATTGTATAGC	miRNA	ssc-let-7f	mature	known	non-templated	pig	21	2496	0	20	2	0	three_non-temp	three_prime	7	0	0	0
TGAGGTAGTAGATTGTATAGG	miRNA	ssc-let-7f	mature	known	non-templated	pig	21	256	0	20	2	0	three_non-temp	three_prime	20	0	0	0
TGAGGTAGTAGATTGTATAGT	miRNA	ssc-let-7f	mature	known	templated	pig	21	11911	0	21	1	0	three_temp	three_prime	2	0	1	0
TGAGGTAGTAGATTGTATAGTA	miRNA	ssc-let-7f	mature	known	non-templated	pig	22	772	0	21	1	0	three_non-temp	three_prime	12	0	0	0
TGAGGTAGTAGATTGTATAGTC	miRNA	ssc-let-7f	mature	known	non-templated	pig	22	10552	0	21	1	0	three_non-temp	three_prime	3	0	1	0
TGAGGTAGTAGATTGTATAGTG	miRNA	ssc-let-7f	mature	known	non-templated	pig	22	594	0	21	1	0	three_non-temp	three_prime	16	0	0	0
TGAGGTAGTAGATTGTATAGTT	miRNA	ssc-let-7f	mature	known	templated	pig	22	47486	0	22	0	1	mature	mature	1	1	1	0
TGAGGTAGTAGATTGTATAGTTA	miRNA	ssc-let-7f	mature	known	non-templated	pig	23	1674	0	22	1	0	three_non-temp	three_prime	11	0	0	0
TGAGGTAGTAGATTGTATAGTTC	miRNA	ssc-let-7f	mature	known	non-templated	pig	23	556	0	22	1	0	three_non-temp	three_prime	17	0	0	0
TGAGGTAGTAGATTGTATAGTTT	miRNA	ssc-let-7f	mature	known	templated	pig	23	3269	0	22	1	0	three_temp	three_prime	6	0	0	0
TGAGGTAGTAGGTTGTA	miRNA	ssc-let-7a	mature	known	templated	pig	17	1167	0	17	5	0	three_temp	three_prime	13	0	0	0
TGAGGTAGTAGGTTGTAC	miRNA	ssc-let-7a	mature	known	non-templated	pig	18	975	0	17	5	0	three_non-temp	three_prime	19	0	0	0
TGAGGTAGTAGGTTGTAT	miRNA	ssc-let-7a	mature	known	templated	pig	18	4777	0	18	4	0	three_temp	three_prime	8	0	0	0
TGAGGTAGTAGGTTGTATA	miRNA	ssc-let-7a	mature	known	templated	pig	19	1027	0	19	3	0	three_temp	three_prime	15	0	0	0
TGAGGTAGTAGGTTGTATAG	miRNA	ssc-let-7a	mature	known	templated	pig	20	2952	0	20	2	0	three_temp	three_prime	10	0	0	0
TGAGGTAGTAGGTTGTATAGA	miRNA	ssc-let-7a	mature	known	non-templated	pig	21	444	0	20	2	0	three_non-temp	three_prime	24	0	0	0
TGAGGTAGTAGGTTGTATAGC	miRNA	ssc-let-7a	mature	known	non-templated	pig	21	5696	0	20	2	0	three_non-temp	three_prime	5	0	1	0
TGAGGTAGTAGGTTGTATAGG	miRNA	ssc-let-7a	mature	known	non-templated	pig	21	628	0	20	2	0	three_non-temp	three_prime	21	0	0	0
TGAGGTAGTAGGTTGTATAGT	miRNA	ssc-let-7a	mature	known	templated	pig	21	26542	0	21	1	0	three_temp	three_prime	2	0	1	0
TGAGGTAGTAGGTTGTATAGTA	miRNA	ssc-let-7a	mature	known	non-templated	pig	22	1568	0	21	1	0	three_non-temp	three_prime	12	0	0	0
TGAGGTAGTAGGTTGTATAGTC	miRNA	ssc-let-7a	mature	known	non-templated	pig	22	17182	0	21	1	0	three_non-temp	three_prime	3	0	1	0
TGAGGTAGTAGGTTGTATAGTG	miRNA	ssc-let-7a	mature	known	non-templated	pig	22	988	0	21	1	0	three_non-temp	three_prime	18	0	0	0
TGAGGTAGTAGGTTGTATAGTT	miRNA	ssc-let-7a	mature	known	templated	pig	22	75849	0	22	0	1	mature	mature	1	1	1	0
TGAGGTAGTAGGTTGTATAGTTA	miRNA	ssc-let-7a	mature	known	non-templated	pig	23	2243	0	22	1	0	three_non-temp	three_prime	11	0	0	0
TGAGGTAGTAGGTTGTATAGTTC	miRNA	ssc-let-7a	mature	known	non-templated	pig	23	1027	0	22	1	0	three_non-temp	three_prime	16	0	0	0
TGAGGTAGTAGGTTGTATAGTTT	miRNA	ssc-let-7a	mature	known	templated	pig	23	5595	0	22	1	0	three_temp	three_prime	6	0	0	0
TGAGGTAGTAGGTTGTATGGT	miRNA	ssc-let-7c	mature	known	templated	pig	21	1151	0	21	1	0	three_temp	three_prime	4	0	1	0
TGAGGTAGTAGGTTGTATGGTC	miRNA	ssc-let-7c	mature	known	non-templated	pig	22	1724	0	21	1	0	three_non-temp	three_prime	2	0	1	0
TGAGGTAGTAGGTTGTATGGTT	miRNA	ssc-let-7c	mature	known	templated	pig	22	7753	0	22	0	1	mature	mature	1	1	1	0
TGAGGTAGTAGGTTGTATGGTTT	miRNA	ssc-let-7c	mature	known	templated	pig	23	622	0	22	1	0	three_temp	three_prime	5	0	1	0
TGAGGTAGTAGGTTGTG	miRNA	ssc-let-7a	mature	known	templated	pig	17	557	0	16	6	0	three_temp	three_prime	23	0	0	0
TGAGGTAGTAGGTTGTGT	miRNA	bta-let-7b	mature	novel	templated	cattle	18	805	0	18	4	0	three_temp	three_prime	16	0	0	0
TGAGGTAGTAGGTTGTGTG	miRNA	bta-let-7b	mature	novel	templated	cattle	19	571	0	19	3	0	three_temp	three_prime	17	0	0	0
TGAGGTAGTAGGTTGTGTGG	miRNA	bta-let-7b	mature	novel	templated	cattle	20	1473	0	20	2	0	three_temp	three_prime	11	0	0	0
TGAGGTAGTAGGTTGTGTGGC	miRNA	bta-let-7b	mature	novel	non-templated	cattle	21	1294	0	20	2	0	three_non-temp	three_prime	12	0	0	0
TGAGGTAGTAGGTTGTGTGGT	miRNA	bta-let-7b	mature	novel	templated	cattle	21	5709	0	21	1	0	three_temp	three_prime	3	0	1	0
TGAGGTAGTAGGTTGTGTGGTA	miRNA	bta-let-7b	mature	novel	non-templated	cattle	22	857	0	21	1	0	three_non-temp	three_prime	14	0	0	0
TGAGGTAGTAGGTTGTGTGGTAT	miRNA	bta-let-7b	mature	novel	non-templated	cattle	23	375	0	21	2	0	three_non-temp	three_prime	19	0	0	0
TGAGGTAGTAGGTTGTGTGGTC	miRNA	bta-let-7b	mature	novel	non-templated	cattle	22	4642	0	21	1	0	three_non-temp	three_prime	4	0	1	0
TGAGGTAGTAGGTTGTGTGGTG	miRNA	bta-let-7b	mature	novel	non-templated	cattle	22	422	0	21	1	0	three_non-temp	three_prime	18	0	0	0
TGAGGTAGTAGGTTGTGTGGTT	miRNA	bta-let-7b	mature	novel	templated	cattle	22	21937	0	22	0	1	mature	mature	1	1	1	0
TGAGGTAGTAGGTTGTGTGGTTA	miRNA	bta-let-7b	mature	novel	non-templated	cattle	23	1830	0	22	1	0	three_non-temp	three_prime	6	0	0	0
TGAGGTAGTAGGTTGTGTGGTTAC	miRNA	bta-let-7b	mature	novel	non-templated	cattle	24	291	0	22	2	0	three_non-temp	three_prime	22	0	0	0
TGAGGTAGTAGGTTGTGTGGTTAT	miRNA	bta-let-7b	mature	novel	non-templated	cattle	24	1475	0	22	2	0	three_non-temp	three_prime	10	0	0	0
TGAGGTAGTAGGTTGTGTGGTTC	miRNA	bta-let-7b	mature	novel	non-templated	cattle	23	1691	0	22	1	0	three_non-temp	three_prime	7	0	0	0
TGAGGTAGTAGGTTGTGTGGTTT	miRNA	bta-let-7b	mature	novel	templated	cattle	23	9229	0	22	1	0	three_temp	three_prime	2	0	1	0
TGAGGTAGTAGGTTGTGTGGTTTT	miRNA	bta-let-7b	mature	novel	non-templated	cattle	24	1571	0	22	2	0	three_non-temp	three_prime	9	0	0	0
TGAGGTAGTAGTTTGTAC	miRNA	ssc-let-7g	mature	known	templated	pig	18	1985	0	18	4	0	three_temp	three_prime	9	0	0	0
TGAGGTAGTAGTTTGTACA	miRNA	ssc-let-7g	mature	known	templated	pig	19	468	0	19	3	0	three_temp	three_prime	14	0	0	0
TGAGGTAGTAGTTTGTACAG	miRNA	ssc-let-7g	mature	known	templated	pig	20	2227	0	20	2	0	three_temp	three_prime	7	0	0	0
TGAGGTAGTAGTTTGTACAGC	miRNA	ssc-let-7g	mature	known	non-templated	pig	21	2563	0	20	2	0	three_non-temp	three_prime	6	0	0	0
TGAGGTAGTAGTTTGTACAGT	miRNA	ssc-let-7g	mature	known	templated	pig	21	12011	0	21	1	0	three_temp	three_prime	2	0	1	0
TGAGGTAGTAGTTTGTACAGTA	miRNA	ssc-let-7g	mature	known	non-templated	pig	22	637	0	21	1	0	three_non-temp	three_prime	12	0	0	0
TGAGGTAGTAGTTTGTACAGTC	miRNA	ssc-let-7g	mature	known	non-templated	pig	22	6359	0	21	1	0	three_non-temp	three_prime	3	0	1	0
TGAGGTAGTAGTTTGTACAGTG	miRNA	ssc-let-7g	mature	known	non-templated	pig	22	411	0	21	1	0	three_non-temp	three_prime	18	0	0	0
TGAGGTAGTAGTTTGTACAGTT	miRNA	ssc-let-7g	mature	known	templated	pig	22	30211	0	22	0	1	mature	mature	1	1	1	0
TGAGGTAGTAGTTTGTACAGTTA	miRNA	ssc-let-7g	mature	known	non-templated	pig	23	1558	0	22	1	0	three_non-temp	three_prime	10	0	0	0
TGAGGTAGTAGTTTGTACAGTTC	miRNA	ssc-let-7g	mature	known	non-templated	pig	23	528	0	22	1	0	three_non-temp	three_prime	13	0	0	0
TGAGGTAGTAGTTTGTACAGTTT	miRNA	ssc-let-7g	mature	known	templated	pig	23	2701	0	22	1	0	three_temp	three_prime	5	0	1	0
TGAGGTAGTAGTTTGTGC	miRNA	ssc-let-7i	mature	known	templated	pig	18	635	0	18	1	0	three_temp	three_prime	14	0	0	0
TGAGGTAGTAGTTTGTGCC	miRNA	ssc-let-7i	mature	known	non-templated	pig	19	417	0	18	1	0	three_non-temp	three_prime	17	0	0	0
TGAGGTAGTAGTTTGTGCCGTT	miRNA	ssc-let-7i	mature	known	non-templated	pig	22	436	0	18	4	0	three_non-temp	three_prime	16	0	0	0
TGAGGTAGTAGTTTGTGCT	miRNA	ssc-let-7i	mature	known	templated	pig	19	1587	0	19	0	1	mature	mature	11	0	0	0
TGAGGTAGTAGTTTGTGCTG	miRNA	ssc-let-7i	mature	known	templated	pig	20	1660	0	19	1	0	three_temp	three_prime	10	0	0	0
TGAGGTAGTAGTTTGTGCTGC	miRNA	ssc-let-7i	mature	known	non-templated	pig	21	2845	0	19	2	0	three_non-temp	three_prime	8	0	0	0
TGAGGTAGTAGTTTGTGCTGCT	miRNA	ssc-let-7i	mature	known	non-templated	pig	22	541	0	19	3	0	three_non-temp	three_prime	15	0	0	0
TGAGGTAGTAGTTTGTGCTGG	miRNA	ssc-let-7i	mature	known	non-templated	pig	21	303	0	19	2	0	three_non-temp	three_prime	22	0	0	0
TGAGGTAGTAGTTTGTGCTGGT	miRNA	ssc-let-7i	mature	known	non-templated	pig	22	351	0	19	3	0	three_non-temp	three_prime	21	0	0	0
TGAGGTAGTAGTTTGTGCTGT	miRNA	ssc-let-7i	mature	known	templated	pig	21	13121	0	19	2	0	three_temp	three_prime	5	0	1	0
TGAGGTAGTAGTTTGTGCTGTA	miRNA	ssc-let-7i	mature	known	non-templated	pig	22	3273	0	19	3	0	three_non-temp	three_prime	6	0	0	0
TGAGGTAGTAGTTTGTGCTGTC	miRNA	ssc-let-7i	mature	known	non-templated	pig	22	29778	0	19	3	0	three_non-temp	three_prime	2	0	1	0
TGAGGTAGTAGTTTGTGCTGTG	miRNA	ssc-let-7i	mature	known	non-templated	pig	22	2569	0	19	3	0	three_non-temp	three_prime	9	0	0	0
TGAGGTAGTAGTTTGTGCTGTT	miRNA	ssc-let-7i	mature	known	templated	pig	22	139868	0	19	3	0	three_temp	three_prime	1	1	1	0
TGAGGTAGTAGTTTGTGCTGTTA	miRNA	ssc-let-7i	mature	known	non-templated	pig	23	16299	0	19	4	0	three_non-temp	three_prime	4	0	1	0
TGAGGTAGTAGTTTGTGCTGTTAA	miRNA	ssc-let-7i	mature	known	non-templated	pig	24	359	0	19	5	0	three_non-temp	three_prime	19	0	0	0
TGAGGTAGTAGTTTGTGCTGTTAT	miRNA	ssc-let-7i	mature	known	non-templated	pig	24	1271	0	19	5	0	three_non-temp	three_prime	13	0	0	0
TGAGGTAGTAGTTTGTGCTGTTC	miRNA	ssc-let-7i	mature	known	non-templated	pig	23	2869	0	19	4	0	three_non-temp	three_prime	7	0	0	0
TGAGGTAGTAGTTTGTGCTGTTG	miRNA	ssc-let-7i	mature	known	templated	pig	23	1520	0	19	4	0	three_temp	three_prime	12	0	0	0
TGAGGTAGTAGTTTGTGCTGTTT	miRNA	ssc-let-7i	mature	known	non-templated	pig	23	16383	0	19	4	0	three_non-temp	three_prime	3	0	1	0
TGAGGTAGTAGTTTGTGCTGTTTT	miRNA	ssc-let-7i	mature	known	non-templated	pig	24	388	0	19	5	0	three_non-temp	three_prime	18	0	0	0
TGATATGTTTGATATATTAGGTTG	miRNA	ssc-miR-190a	mature	known	templated	pig	24	908	0	21	3	0	three_temp	three_prime	1	1	1	0
TGATATGTTTGATATTGGGTTG	miRNA	ssc-miR-190b	mature	known	templated	pig	22	744	0	22	0	1	mature	mature	1	1	1	0
TGATATGTTTGATATTGGGTTGT	miRNA	ssc-miR-190b	mature	known	templated	pig	23	576	0	22	1	0	three_temp	three_prime	2	0	1	0
TGCCTGGTAATGATGAC	miRNA	hsa-miR-200b-3p	mature	novel	templated	human	17	547	-6	16	1	0	both_temp	both	8	0	0	0
TGCGGAACCTGCGGATACGG	miRNA	ssc-miR-7134-3p	mature	known	templated	pig	20	4234	1	20	0	0	five_temp	five_prime	3	0	1	0
TGCGGAACCTGCGGATACGGA	miRNA	ssc-miR-7134-3p	mature	known	non-templated	pig	21	943	-1	20	1	0	both_non-temp	both	9	0	0	0
TGCGGGGCTAGGGCTAAC	miRNA	ssc-miR-744	mature	known	templated	pig	18	686	0	18	4	0	three_temp	three_prime	6	0	0	0
TGCGGGGCTAGGGCTAACAGC	miRNA	ssc-miR-744	mature	known	templated	pig	21	9222	0	21	1	0	three_temp	three_prime	2	0	1	0
TGCGGGGCTAGGGCTAACAGCA	miRNA	ssc-miR-744	mature	known	templated	pig	22	12391	0	22	0	1	mature	mature	1	1	1	0
TGCGGGGCTAGGGCTAACAGCG	miRNA	ssc-miR-744	mature	known	non-templated	pig	22	340	0	21	1	0	three_non-temp	three_prime	7	0	0	0
TGCGGGGCTAGGGCTAACAGT	miRNA	ssc-miR-744	mature	known	non-templated	pig	21	1734	0	20	2	0	three_non-temp	three_prime	5	0	1	0
TGGAAGACTAGTGATTT	miRNA	ssc-miR-7	mature	known	templated	pig	17	569	0	17	7	0	three_temp	three_prime	42	0	0	0
TGGAAGACTAGTGATTTT	miRNA	ssc-miR-7	mature	known	templated	pig	18	1954	0	18	6	0	three_temp	three_prime	23	0	0	0
TGGAAGACTAGTGATTTTGT	miRNA	ssc-miR-7	mature	known	templated	pig	20	1296	0	20	4	0	three_temp	three_prime	28	0	0	0
TGGAAGACTAGTGATTTTGTC	miRNA	ssc-miR-7	mature	known	non-templated	pig	21	1448	0	20	4	0	three_non-temp	three_prime	27	0	0	0
TGGAAGACTAGTGATTTTGTT	miRNA	ssc-miR-7	mature	known	templated	pig	21	6771	0	21	3	0	three_temp	three_prime	13	0	0	0
TGGAAGACTAGTGATTTTGTTA	miRNA	ssc-miR-7	mature	known	non-templated	pig	22	1698	0	21	3	0	three_non-temp	three_prime	24	0	0	0
TGGAAGACTAGTGATTTTGTTG	miRNA	ssc-miR-7	mature	known	templated	pig	22	28459	0	22	2	0	three_temp	three_prime	5	0	1	0
TGGAAGACTAGTGATTTTGTTGA	miRNA	ssc-miR-7	mature	known	non-templated	pig	23	1070	0	22	2	0	three_non-temp	three_prime	33	0	0	0
TGGAAGACTAGTGATTTTGTTGC	miRNA	ssc-miR-7	mature	known	non-templated	pig	23	10976	0	22	2	0	three_non-temp	three_prime	10	0	0	0
TGGAAGACTAGTGATTTTGTTGCC	miRNA	hsa-miR-7-5p	mature	novel	non-templated	human	24	488	0	22	2	0	three_non-temp	three_prime	3	0	1	0
TGGAAGACTAGTGATTTTGTTGG	miRNA	ssc-miR-7	mature	known	non-templated	pig	23	1210	0	22	2	0	three_non-temp	three_prime	30	0	0	0
TGGAAGACTAGTGATTTTGTTGGT	miRNA	hsa-miR-7-5p	mature	novel	non-templated	human	24	1296	0	22	2	0	three_non-temp	three_prime	2	0	1	0
TGGAAGACTAGTGATTTTGTTGT	miRNA	ssc-miR-7	mature	known	templated	pig	23	50428	0	23	1	0	three_temp	three_prime	4	0	1	0
TGGAAGACTAGTGATTTTGTTGTA	miRNA	ssc-miR-7	mature	known	non-templated	pig	24	12765	0	23	1	0	three_non-temp	three_prime	8	0	0	0
TGGAAGACTAGTGATTTTGTTGTAA	miRNA	ssc-miR-7	mature	known	non-templated	pig	25	1658	0	23	2	0	three_non-temp	three_prime	25	0	0	0
TGGAAGACTAGTGATTTTGTTGTAAA	miRNA	ssc-miR-7	mature	known	non-templated	pig	26	3323	0	23	3	0	three_non-temp	three_prime	17	0	0	0
TGGAAGACTAGTGATTTTGTTGTAGA	miRNA	ssc-miR-7	mature	known	non-templated	pig	26	620	0	23	3	0	three_non-temp	three_prime	41	0	0	0
TGGAAGACTAGTGATTTTGTTGTC	miRNA	ssc-miR-7	mature	known	non-templated	pig	24	141588	0	23	1	0	three_non-temp	three_prime	2	0	1	0
TGGAAGACTAGTGATTTTGTTGTG	miRNA	ssc-miR-7	mature	known	non-templated	pig	24	11712	0	23	1	0	three_non-temp	three_prime	9	0	0	0
TGGAAGACTAGTGATTTTGTTGTT	miRNA	ssc-miR-7	mature	known	templated	pig	24	665874	0	24	0	1	mature	mature	1	1	1	0
TGGAAGACTAGTGATTTTGTTGTTA	miRNA	ssc-miR-7	mature	known	non-templated	pig	25	15029	0	24	1	0	three_non-temp	three_prime	7	0	0	0
TGGAAGACTAGTGATTTTGTTGTTAA	miRNA	ssc-miR-7	mature	known	non-templated	pig	26	4118	0	24	2	0	three_non-temp	three_prime	16	0	0	0
TGGAAGACTAGTGATTTTGTTGTTAAA	miRNA	ssc-miR-7	mature	known	non-templated	pig	27	8421	0	24	3	0	three_non-temp	three_prime	12	0	0	0
TGGAAGACTAGTGATTTTGTTGTTAAC	miRNA	ssc-miR-7	mature	known	non-templated	pig	27	1180	0	24	3	0	three_non-temp	three_prime	31	0	0	0
TGGAAGACTAGTGATTTTGTTGTTAAG	miRNA	ssc-miR-7	mature	known	non-templated	pig	27	977	0	24	3	0	three_non-temp	three_prime	34	0	0	0
TGGAAGACTAGTGATTTTGTTGTTAAT	miRNA	ssc-miR-7	mature	known	non-templated	pig	27	2270	0	24	3	0	three_non-temp	three_prime	20	0	0	0
TGGAAGACTAGTGATTTTGTTGTTAGA	miRNA	ssc-miR-7	mature	known	non-templated	pig	27	893	0	24	3	0	three_non-temp	three_prime	36	0	0	0
TGGAAGACTAGTGATTTTGTTGTTAT	miRNA	ssc-miR-7	mature	known	non-templated	pig	26	1123	0	24	2	0	three_non-temp	three_prime	32	0	0	0
TGGAAGACTAGTGATTTTGTTGTTC	miRNA	ssc-miR-7	mature	known	templated	pig	25	959	0	24	1	0	three_temp	three_prime	35	0	0	0
TGGAAGACTAGTGATTTTGTTGTTG	miRNA	ssc-miR-7	mature	known	templated	pig	25	1542	0	24	1	0	three_temp	three_prime	26	0	0	0
TGGAAGACTAGTGATTTTGTTGTTT	miRNA	ssc-miR-7	mature	known	templated	pig	25	4148	0	24	1	0	three_temp	three_prime	15	0	0	0
TGGAATGTAAAGAAGTATGTAC	miRNA	ssc-miR-1	mature	known	non-templated	pig	22	2208	0	21	1	0	three_non-temp	three_prime	2	0	1	0
TGGAATGTAAAGAAGTATGTAT	miRNA	ssc-miR-1	mature	known	templated	pig	22	2390	0	21	1	0	three_temp	three_prime	1	1	1	0
TGGACGGAGAACTGATAAGGGC	miRNA	ssc-miR-184	mature	known	non-templated	pig	22	552	0	21	1	0	three_non-temp	three_prime	2	0	1	0
TGGACGGAGAACTGATAAGGGT	miRNA	ssc-miR-184	mature	known	templated	pig	22	2422	0	22	0	1	mature	mature	1	1	1	0
TGGACGTTGGCTCTGGTGGTGA	miRNA	hsa-miR-1306-3p	mature	novel	templated	human	22	1424	3	18	1	0	both_temp	both	1	1	1	0
TGGACTTGGAGTCAGAAGG	miRNA	ssc-miR-378	mature	known	templated	pig	19	1952	-2	19	-1	0	both_temp	both	22	0	0	0
TGGACTTGGAGTCAGAAGGA	miRNA	ssc-miR-378	mature	known	non-templated	pig	20	488	-2	19	1	0	both_non-temp	both	33	0	0	0
TGGACTTGGAGTCAGAAGGC	miRNA	ssc-miR-378	mature	known	templated	pig	20	14878	2	20	0	0	five_temp	five_prime	10	0	0	0
TGGACTTGGAGTCAGAAGGCA	miRNA	ssc-miR-378	mature	known	non-templated	pig	21	1336	-2	20	1	0	both_non-temp	both	25	0	0	0
TGGACTTGGAGTCAGAAGGCC	miRNA	ssc-miR-378	mature	known	templated	pig	21	711	-2	20	1	0	both_temp	both	29	0	0	0
TGGACTTGGAGTCAGAAGGCT	miRNA	ssc-miR-378	mature	known	templated	pig	21	521	-2	20	1	0	both_temp	both	32	0	0	0
TGGACTTGGAGTCAGAAGGT	miRNA	ssc-miR-378	mature	known	non-templated	pig	20	3242	-2	19	1	0	both_non-temp	both	19	0	0	0
TGGAGAGAAAGGCAGTTCCTG	miRNA	ssc-miR-185	mature	known	templated	pig	21	2613	0	21	1	0	three_temp	three_prime	3	0	1	0
TGGAGAGAAAGGCAGTTCCTGA	miRNA	ssc-miR-185	mature	known	templated	pig	22	18763	0	22	0	1	mature	mature	1	1	1	0
TGGAGAGAAAGGCAGTTCCTGAA	miRNA	ssc-miR-185	mature	known	non-templated	pig	23	1220	0	22	1	0	three_non-temp	three_prime	4	0	1	0
[truncated: 257 more rows]

## Sheet: Sheet2
number of top non-temp
28

## Sheet: non-temp_top
seq	type	miRNA	miRNA.type	miRNA_status	templated	species	length	count_sum	five_prime	middle	three_prime	mature	group	modification	rank	top_rank	top_5_rank	top_non-temp
TAACACTGTCTGGTAACGATGTC	miRNA	hsa-miR-200a-3p	mature	novel	non-templated	cattle	23	61675	0	22	1	0	three_non-temp	three_prime	1	1	1	1
AGCTTATCAGACTGATGTTGACA	miRNA	bta-miR-21-5p	mature	novel	non-templated	cattle	23	52101	-1	22	1	0	both_non-temp	both	1	1	1	1
CCTGGACTTGGAGTCAGAAGG	miRNA	bta-miR-378d	mature	novel	non-templated	cattle	21	13630	1	19	3	0	both_non-temp	both	1	1	1	1
AAATGGATTTTTGGAGCT	miRNA	bta-miR-1246	mature	novel	non-templated	cattle	18	6912	1	16	3	0	both_non-temp	both	1	1	1	1
CTGTGCGTGTGACAGCGGCTGAAA	miRNA	ssc-miR-210	mature	known	non-templated	pig	24	5676	0	22	2	0	three_non-temp	three_prime	1	1	1	1
ACTCAAACTGTGGGGGCACCTT	miRNA	hsa-miR-371a-5p	mature	novel	non-templated	human	22	5615	0	19	3	0	three_non-temp	three_prime	1	1	1	1
TAAGTGCTTCCATGCTTTAGTAG	miRNA	hsa-miR-302e	mature	novel	non-templated	human	23	5068	0	17	6	0	three_non-temp	three_prime	1	1	1	1
TCAGTGCATGACAGAACTTGGT	miRNA	ssc-miR-152	mature	known	non-templated	pig	22	4144	0	21	1	0	three_non-temp	three_prime	1	1	1	1
ACTGGGCTTGGAGTCAGAAGGC	miRNA	hsa-miR-378g	mature	novel	non-templated	human	22	3847	0	20	2	0	three_non-temp	three_prime	1	1	1	1
ACTGGACTTGGAGTCAGGAGGC	miRNA	hsa-miR-378e	mature	novel	non-templated	human	22	3842	0	19	3	0	three_non-temp	three_prime	1	1	1	1
ACTGGACTTGGAGCCAGAAGGC	miRNA	hsa-miR-378f	mature	novel	non-templated	human	22	3451	0	20	2	0	three_non-temp	three_prime	1	1	1	1
TGGAAGACTAGTGATTTTGTTGCT	miRNA	hsa-miR-7-5p	mature	novel	non-templated	human	24	2260	0	22	2	0	three_non-temp	three_prime	1	1	1	1
ATCACATTGCCAGGGATTACCACT	miRNA	ssc-miR-23b	mature	known	non-templated	pig	24	2234	0	22	2	0	three_non-temp	three_prime	1	1	1	1
TCCTTCATTCCACCGGAGTCTGA	miRNA	ssc-miR-205	mature	known	non-templated	pig	23	2102	0	22	1	0	three_non-temp	three_prime	1	1	1	1
TCCCAGCGGTGCCTCCA	miRNA	hsa-miR-5100	mature	novel	non-templated	human	17	1831	-6	15	2	0	both_non-temp	both	1	1	1	1
AAAGTGCTTATAGTGCAGGTAGA	miRNA	bta-miR-20a	mature	novel	non-templated	cattle	23	1699	-1	22	1	0	both_non-temp	both	1	1	1	1
TGTGCAAATCTATGCAAAACTGT	miRNA	ssc-miR-19a	mature	known	non-templated	pig	23	942	0	22	1	0	three_non-temp	three_prime	1	1	1	1
TGTAAACATCCCCGACTGGAAGTT	miRNA	hsa-miR-30d-5p	mature	novel	non-templated	human	24	738	0	22	2	0	three_non-temp	three_prime	1	1	1	1
GCAGTCCATGGGCATATACACC	miRNA	ssc-miR-455-3p	mature	known	non-templated	pig	22	716	0	21	1	0	three_non-temp	three_prime	1	1	1	1
ACTGGACTTGGAGTCAGAAAGC	miRNA	hsa-miR-378d	mature	novel	non-templated	human	22	687	0	20	2	0	three_non-temp	three_prime	1	1	1	1
CCTGAACTAGGGGTCTGGAGT	miRNA	ssc-miR-345-3p	mature	known	non-templated	pig	21	650	-1	20	1	0	both_non-temp	both	1	1	1	1
TCCCTGTCCTCCAGGAGCTCT	miRNA	ssc-miR-4334-3p	mature	known	non-templated	pig	21	639	0	20	1	0	three_non-temp	three_prime	1	1	1	1
ACTGGACTAGGAGTCAGAAGGC	miRNA	hsa-miR-378i	mature	novel	non-templated	human	22	622	0	21	1	0	three_non-temp	three_prime	1	1	1	1
AGGCAGTGTATTGTTAGCTGGT	miRNA	bta-miR-449b	mature	novel	non-templated	cattle	22	596	0	21	1	0	three_non-temp	three_prime	1	1	1	1
TCACATTGCCAGGGATTACCACT	miRNA	bta-miR-23b-3p	mature	novel	non-templated	cattle	23	584	-1	22	1	0	both_non-temp	both	1	1	1	1
CTATACAATCTACTGTCTTTCT	miRNA	bta-let-7a-3p	mature	novel	non-templated	cattle	22	544	0	21	1	0	three_non-temp	three_prime	1	1	1	1
TAGCAGCGGGAACAGTACTGAAA	miRNA	bta-miR-503-5p	mature	novel	non-templated	cattle	23	446	0	20	3	0	three_non-temp	three_prime	1	1	1	1
CTATACAACCTACTGCCTTCCT	miRNA	hsa-let-7b-3p	mature	novel	non-templated	human	22	433	0	21	1	0	three_non-temp	three_prime	1	1	1	1
