# Supplementary material for: Small RNA-seq analysis of single porcine blastocysts revealed that maternal estradiol-17beta exposure does not affect miRNA isoform (isomiR) expression
Source: BMC Genomics. 2018 Aug 6;19:590. doi: 10.1186/s12864-018-4954-9 (PMC6090871; doi:10.1186/s12864-018-4954-9)
Supplement: Supplementary file 15 — Table S9. IsomiR count table. (XLSX 594 kb) [file 12864_2018_4954_MOESM15_ESM.xlsx]

## Sheet: miRNA_isomir_counttable
joined name	f000_S03_E01	f000_S09_E02	f000_S11_E03	f000_S11_E01	f000_S12_E02	f000_S12_E01	f010_S02_E01	f010_S04_E03	f010_S04_E01	f010_S07_E01	f010_S08_E01	f010_S08_E02	f1000_S01_E01	f1000_S01_E02	f1000_S05_E01	f1000_S05_E02	f1000_S06_E02	f1000_S10_E02	m000_S03_E02	m000_S09_E01	m000_S11_E02	m000_S12_E03	m000_S12_E04	m000_S12_E05	m010_S02_E03	m010_S02_E02	m010_S04_E02	m010_S04_E04	m010_S07_E02	m010_S07_E03	m1000_S01_E03	m1000_S05_E03	m1000_S06_E01	m1000_S06_E03	m1000_S10_E01	m1000_S10_E03	countsum	avg_count	high expressed
AAAACGTGAGGCGCTGCTAT_ssc-miR-424-3p	20	12	22	52	51	66	41	53	34	33	57	46	23	32	51	20	22	37	32	35	37	34	30	41	60	38	17	66	31	55	24	68	69	35	33	26	1403	38.9722	1
AAAACGTGAGGCGCTGCTATA_ssc-miR-424-3p	36	18	35	36	44	27	33	43	30	33	61	109	13	23	62	22	13	26	37	44	17	38	11	28	41	21	19	50	23	36	13	62	82	13	27	23	1249	34.6944	1
AAAAGCTGGGTTGAGAGGGC_ssc-miR-320	73	86	99	90	100	59	113	83	54	95	121	79	21	94	109	45	66	89	105	71	130	73	48	51	97	107	43	82	71	121	63	68	79	38	119	47	2889	80.25	1
AAAAGCTGGGTTGAGAGGGCA_ssc-miR-320	19	16	9	16	14	14	21	24	15	7	8	36	3	16	12	0	16	7	8	8	17	10	7	7	18	4	4	13	13	20	13	13	50	10	8	12	488	13.5556	0
AAAAGCTGGGTTGAGAGGGCG_ssc-miR-320	145	247	229	113	151	146	154	118	130	174	182	241	45	164	146	54	117	136	102	208	195	121	46	96	154	136	55	103	124	209	77	108	229	53	158	74	4940	137.222	1
AAAAGCTGGGTTGAGAGGGCGA_ssc-miR-320	414	791	589	210	546	606	363	613	360	334	758	1474	123	413	505	219	247	403	222	509	254	526	174	480	341	237	146	226	238	480	221	302	856	223	369	217	14989	416.361	1
AAAAGCTGGGTTGAGAGGGCGAA_ssc-miR-320	543	755	498	234	495	546	255	594	428	271	700	1356	108	359	416	239	187	390	316	472	234	455	154	398	319	201	181	246	250	430	179	305	740	218	373	212	14057	390.472	1
AAAAGCTGGGTTGAGAGGGCGAAA_ssc-miR-320	256	293	226	100	209	185	114	266	168	132	276	559	45	151	206	86	76	167	172	221	106	171	82	154	159	122	104	141	137	167	86	127	300	68	144	77	6053	168.139	1
AAAAGCTGGGTTGAGAGGGCGAAAA_ssc-miR-320	43	34	17	16	14	23	19	29	21	23	28	57	1	9	23	14	9	21	25	24	10	17	6	18	16	15	9	13	13	22	9	15	26	10	16	8	673	18.6944	0
AAAAGCTGGGTTGAGAGGGCGAAAT_ssc-miR-320	15	12	10	14	22	31	14	20	9	4	13	10	5	11	17	8	10	16	8	17	10	16	8	14	6	8	3	10	12	21	8	10	27	6	15	10	450	12.5	0
AAAAGCTGGGTTGAGAGGGCGAAC_ssc-miR-320	17	17	10	17	20	43	36	42	32	25	32	25	18	37	17	14	27	24	19	13	22	14	21	30	16	7	10	22	25	39	21	20	52	18	29	24	855	23.75	1
AAAAGCTGGGTTGAGAGGGCGAAG_ssc-miR-320	47	40	37	34	56	49	30	50	55	48	66	49	18	85	43	19	29	61	50	40	43	48	19	48	34	27	17	28	25	33	20	31	45	11	61	21	1417	39.3611	1
AAAAGCTGGGTTGAGAGGGCGAAT_ssc-miR-320	66	104	74	81	102	115	97	130	87	52	117	128	45	91	74	55	63	47	48	86	60	90	78	110	85	44	28	70	85	94	95	63	174	47	74	82	2941	81.6944	1
AAAAGCTGGGTTGAGAGGGCGAC_ssc-miR-320	5	14	11	16	13	28	23	23	23	10	16	10	14	21	9	6	14	8	9	5	8	10	11	17	14	8	4	5	9	18	18	13	40	4	18	13	488	13.5556	0
AAAAGCTGGGTTGAGAGGGCGAG_ssc-miR-320	17	33	20	15	26	29	11	27	54	20	24	43	11	73	32	5	35	20	39	15	41	23	11	13	18	13	7	8	5	28	19	18	30	16	20	12	831	23.0833	1
AAAAGCTGGGTTGAGAGGGCGAT_ssc-miR-320	25	62	48	38	78	129	79	74	47	23	77	81	29	75	51	28	37	52	29	44	24	68	50	75	52	25	17	29	59	64	63	49	128	32	39	68	1948	54.1111	1
AAAAGCTGGGTTGAGAGGGCGATT_ssc-miR-320	12	44	3	16	9	9	32	12	10	5	27	17	15	13	11	0	17	4	6	7	4	7	8	10	24	8	4	2	9	13	23	9	27	7	13	14	451	12.5278	0
AAAAGCTGGGTTGAGAGGGCGC_ssc-miR-320	25	27	18	18	18	10	29	35	18	13	29	32	5	12	16	7	16	21	27	23	23	12	15	19	24	11	9	21	14	16	16	17	49	15	25	18	703	19.5278	0
AAAAGCTGGGTTGAGAGGGCGG_ssc-miR-320	5	12	13	8	9	11	7	18	44	3	8	17	0	42	7	0	30	8	3	8	21	4	9	6	10	2	0	4	1	10	5	5	14	4	9	8	365	10.1389	0
AAAAGCTGGGTTGAGAGGGCGT_ssc-miR-320	40	53	35	63	40	77	82	70	66	36	76	60	37	74	58	27	44	33	68	38	33	46	38	59	57	39	20	32	48	55	61	38	130	43	62	47	1885	52.3611	1
AAAAGCTGGGTTGAGAGGGT_ssc-miR-320	7	26	9	34	6	20	57	29	26	9	18	10	13	28	12	2	25	11	13	9	36	5	24	17	17	6	6	39	29	38	32	20	29	12	11	10	695	19.3056	0
AAAAGTGCTTACAGTGCAGGTAG_ssc-miR-106a	83	224	155	42	180	231	44	165	66	30	192	638	29	62	115	74	33	93	14	257	33	196	47	113	83	32	68	67	65	112	27	148	267	53	40	56	4134	114.833	1
AAAAGTGCTTACAGTGCAGGTAGA_ssc-miR-106a	30	92	57	28	69	76	40	98	47	35	108	220	18	48	66	36	23	51	9	76	18	48	25	42	57	19	18	29	40	61	25	59	99	33	25	15	1840	51.1111	1
AAACCCGTAGATCCGATCTTGC_ssc-miR-99a	1	17	4	21	6	8	169	23	15	14	31	13	18	20	6	7	39	7	2	9	5	1	10	5	45	21	2	9	15	27	33	10	37	21	5	24	700	19.4444	0
AAACCCGTAGATCCGATCTTGT_ssc-miR-99a	6	153	29	96	40	25	634	64	67	55	174	129	65	61	55	33	127	63	7	68	37	22	41	44	326	143	5	45	84	106	87	53	155	54	39	90	3282	91.1667	1
AAACCGTTACCATTACTGAGT_ssc-miR-451	1	0	1	5	2	23	29	1	2	4	1	3	32	8	2	0	2	622	1	0	1	3	13	45	11	10	2	2	14	8	108	0	9	1	315	642	1923	53.4167	1
AAACGTGGATGTACTTGCT_hsa-miR-302a-5p	20	38	18	51	43	35	84	43	34	31	50	41	29	59	59	38	39	41	25	42	14	17	34	41	50	37	18	40	54	59	30	80	35	25	67	37	1458	40.5	1
AAACGTGGATGTACTTGCTC_hsa-miR-302a-5p	6	29	28	116	25	69	124	63	64	17	46	21	58	76	52	40	65	32	25	26	27	23	62	55	48	34	10	74	57	83	58	100	86	33	45	58	1835	50.9722	1
AAACGTGGATGTACTTGCTT_hsa-miR-302a-5p	120	284	224	351	358	360	467	365	292	190	386	333	168	322	629	331	215	329	128	287	109	173	246	265	333	208	145	241	267	382	260	559	389	171	447	275	10609	294.694	1
AAACGTGGATGTACTTGCTTT_bta-mir-302a	892	1731	1175	2124	1959	2163	2557	2571	1864	1156	2570	2309	992	1954	3894	2095	1543	1920	1081	1758	740	927	1337	1595	1782	1371	985	1680	1549	2020	1264	2888	2299	1021	2237	1359	63362	1760.06	1
AAACGTGGATGTACTTGCTTTA_bta-mir-302a	18	48	27	30	31	39	40	30	31	14	49	62	12	25	70	41	10	38	12	31	7	23	16	27	21	14	19	19	23	40	16	32	35	14	32	16	1012	28.1111	1
AAACTGTGGGGGCACTT_ssc-miR-371-5p	6	5	9	12	14	13	9	25	9	16	11	3	5	13	15	4	16	8	15	4	10	10	30	12	20	6	7	12	22	24	16	29	6	8	16	13	453	12.5833	0
AAACTGTGGGGGCACTTT_ssc-miR-371-5p	31	35	35	53	53	77	69	63	33	51	65	29	33	71	55	50	35	53	42	28	47	28	78	45	61	41	24	58	51	73	48	92	68	13	52	31	1771	49.1944	1
AAACTGTGGGGGCACTTTC_ssc-miR-371-5p	22	18	7	11	27	23	18	27	11	17	29	10	4	16	21	17	13	10	18	11	12	14	18	11	24	18	12	15	5	10	12	37	19	2	18	7	564	15.6667	0
AAAGAATTCTCCTTTTGGGC_ssc-miR-186	5	23	11	11	16	8	20	15	8	28	32	28	6	10	18	6	11	19	9	28	6	11	16	10	36	23	7	8	15	25	8	17	27	11	17	21	570	15.8333	0
AAAGAATTCTCCTTTTGGGCT_ssc-miR-186	14	65	44	48	50	75	77	58	38	30	83	96	19	41	38	15	33	40	14	67	19	39	40	52	67	18	19	33	53	83	46	50	128	43	30	57	1722	47.8333	1
AAAGAATTCTCCTTTTGGGCTT_ssc-miR-186	17	36	24	21	36	70	38	53	29	11	64	80	11	21	27	12	16	28	10	37	9	41	18	38	32	12	24	32	21	36	23	30	81	23	17	24	1102	30.6111	1
AAAGCACACGGCCTGCAGAGAGG_ENSSSCG00000026843	23	43	24	18	36	21	30	33	35	25	75	87	8	34	54	33	13	41	43	21	24	11	13	27	38	25	24	17	19	14	10	34	42	11	23	12	1041	28.9167	1
AAAGCACACGGCCTGCAGAGAGT_hsa-mir-330	3	15	7	21	13	6	35	13	4	4	17	16	5	22	19	12	12	8	5	8	11	1	11	6	19	7	8	12	9	12	7	15	22	7	12	14	418	11.6111	0
AAAGCTGGGTTGAGAGGGC_ssc-miR-320	16	14	16	29	17	15	28	22	16	55	39	23	5	18	23	15	23	25	38	22	29	14	15	13	32	31	17	19	17	20	15	28	31	8	36	16	800	22.2222	1
AAAGCTGGGTTGAGAGGGCG_ssc-miR-320	31	57	67	22	33	34	34	31	29	44	51	61	17	38	36	14	27	31	39	36	46	29	19	39	32	31	7	21	25	48	14	37	57	16	49	25	1227	34.0833	1
AAAGCTGGGTTGAGAGGGCGA_ssc-miR-320	92	194	156	68	132	140	58	126	65	71	163	309	27	102	102	59	68	117	60	119	56	133	41	92	101	70	45	65	57	107	64	64	214	60	95	62	3554	98.7222	1
AAAGCTGGGTTGAGAGGGCGAA_ssc-miR-320	138	169	157	66	136	136	62	163	90	70	193	356	29	84	107	68	59	96	87	149	66	142	53	101	90	41	56	77	74	97	70	83	242	69	102	57	3835	106.528	1
AAAGCTGGGTTGAGAGGGCGAAA_ssc-miR-320	88	106	82	30	64	86	27	97	56	46	108	178	18	51	56	34	22	64	61	86	45	53	28	57	68	29	40	42	50	56	39	56	103	28	56	26	2136	59.3333	1
AAAGCTGGGTTGAGAGGGCGAAAA_hsa-miR-320c	28	16	15	9	13	12	4	13	8	17	18	31	6	11	13	7	2	16	9	12	5	13	0	8	6	4	2	6	8	11	7	9	16	3	15	3	376	10.4444	0
AAAGCTGGGTTGAGAGGGCGAAG_ssc-miR-320	18	12	16	17	14	11	9	18	19	11	23	30	8	29	15	14	7	20	15	10	22	12	9	7	4	7	4	12	18	15	9	15	16	2	15	11	494	13.7222	0
AAAGCTGGGTTGAGAGGGCGAAT_ssc-miR-320	19	28	14	15	38	47	20	31	29	14	39	32	16	33	24	19	32	15	18	14	15	24	22	28	23	14	11	15	27	28	25	32	39	7	29	14	850	23.6111	1
AAAGCTGGGTTGAGAGGGCGAT_ssc-miR-320	9	15	9	15	16	36	23	23	8	8	15	12	14	25	14	11	4	16	3	10	12	12	12	21	13	5	5	11	9	13	19	16	42	8	12	9	505	14.0278	0
AAAGCTGGGTTGAGAGGGCGT_ssc-miR-320	7	8	9	12	13	19	20	15	15	7	15	14	8	12	8	6	7	12	22	6	4	11	7	21	15	9	0	8	9	9	8	6	25	7	14	16	404	11.2222	0
AAAGTGCTGACAGTGCAGATA_bta-miR-106b	8	13	13	8	10	22	4	22	8	1	16	63	4	4	13	7	2	13	4	32	1	21	14	14	4	5	6	6	15	8	3	9	19	8	3	9	412	11.4444	0
AAAGTGCTGTTCGTGCAGGTAG_hsa-miR-93-5p	99	245	164	74	226	212	97	214	105	70	290	626	38	122	129	96	55	103	35	204	52	162	89	130	113	59	66	74	112	136	73	155	311	88	89	95	5008	139.111	1
AAAGTGCTGTTCGTGCAGGTAGA_hsa-miR-93-5p	13	40	15	12	27	19	12	25	13	14	38	69	9	8	27	8	11	24	9	22	3	17	6	14	22	8	10	12	13	17	8	16	29	13	5	5	613	17.0278	0
AAAGTGCTTACAGTGCAGGT_ssc-miR-106a	2	14	10	4	10	17	8	11	5	3	12	36	2	5	4	3	2	4	2	12	2	10	6	11	5	1	0	6	8	13	2	7	23	7	4	9	280	7.77778	0
AAAGTGCTTACAGTGCAGGTAA_ssc-miR-106a	3	19	10	8	6	28	5	39	13	2	23	50	2	13	6	4	1	2	0	5	1	9	7	12	7	1	1	6	17	15	4	12	50	17	1	8	407	11.3056	0
AAAGTGCTTACAGTGCAGGTAG_ssc-miR-106a	143	378	288	71	320	421	109	304	149	121	353	1269	51	143	183	129	63	191	70	436	66	343	107	229	138	64	97	113	146	175	82	270	530	111	97	122	7882	218.944	1
AAAGTGCTTACAGTGCAGGTAGA_ssc-miR-106a	76	194	81	69	156	137	65	135	101	93	228	435	34	73	129	92	45	98	39	108	55	110	50	81	109	40	53	92	96	102	46	170	173	69	83	54	3771	104.75	1
AAAGTGCTTATAGTGCAGGT_ssc-miR-20a	5	16	12	7	26	25	9	13	9	6	15	42	4	5	12	6	1	9	2	12	4	9	8	12	7	2	7	7	10	14	7	17	25	7	2	10	384	10.6667	0
AAAGTGCTTATAGTGCAGGTAA_ssc-miR-20a	5	31	16	27	21	71	24	53	18	6	30	83	11	27	11	13	12	16	3	22	4	22	29	25	10	3	9	25	26	31	23	33	93	25	7	22	887	24.6389	1
AAAGTGCTTATAGTGCAGGTAG_ssc-miR-20a	295	664	554	323	982	956	281	726	387	295	1030	2003	188	452	610	448	211	620	133	874	172	694	319	555	466	225	295	333	374	609	261	884	1027	304	364	333	19247	534.639	1
AAAGTGCTTATAGTGCAGGTAGA_bta-miR-20a	30	78	54	18	78	88	24	69	40	44	86	197	9	34	69	39	19	51	13	67	10	55	30	31	45	23	31	26	42	60	11	64	72	30	33	29	1699	47.1944	1
AAAGTGCTTCCATGTTTTAGA_bta-miR-302a	6	9	10	13	7	31	20	26	16	1	16	28	9	18	11	5	5	8	1	8	6	8	13	23	10	3	6	14	8	27	12	11	42	15	1	11	458	12.7222	0
AAAGTGCTTCCATGTTTTAGC_bta-miR-302a	120	226	168	242	204	343	336	476	217	76	321	375	118	263	266	164	145	152	84	208	121	127	180	277	146	84	70	215	211	296	166	341	481	140	140	182	7681	213.361	1
AAAGTGCTTCCATGTTTTAGG_bta-miR-302a	6	41	16	10	7	27	17	26	70	4	21	25	5	87	20	5	59	6	1	8	43	9	12	21	12	4	4	14	17	19	3	12	24	15	3	33	706	19.6111	0
AAAGTGCTTCCATGTTTTAGTA_bta-miR-302a	58	153	88	41	131	96	59	109	50	29	134	321	20	75	143	65	17	94	15	139	20	73	41	76	53	34	49	35	56	72	36	116	110	38	77	36	2759	76.6389	1
AAAGTGCTTCCATGTTTTAGTG_bta-miR-302a	63	264	109	55	193	147	102	128	100	59	163	435	49	126	215	124	49	110	35	181	34	89	54	120	108	70	54	49	78	116	47	136	112	39	133	61	4007	111.306	1
AAAGTGCTTCCATGTTTTAGTGA_bta-miR-302a	262	1149	440	233	766	577	455	625	326	288	742	1806	169	419	1088	640	209	434	151	670	148	348	265	366	433	321	255	242	355	533	192	739	629	177	537	245	17234	478.722	1
AAAGTGCTTCCATGTTTTAGTGAA_bta-miR-302a	7	26	17	12	17	11	10	21	9	9	21	69	2	8	30	14	6	16	3	21	7	12	8	11	9	11	2	4	9	21	1	16	11	5	18	7	481	13.3611	0
AAAGTGCTTCCATGTTTTAGTGC_bta-miR-302a	13	52	30	39	41	74	84	91	67	21	87	105	17	48	77	52	34	39	14	38	17	23	37	55	38	26	19	43	41	87	37	54	83	36	28	31	1678	46.6111	1
AAAGTGCTTCCATGTTTTAGTGG_bta-miR-302a	13	56	22	14	29	24	19	38	53	9	31	62	8	79	31	13	55	14	6	35	28	15	14	20	30	13	9	14	28	34	1	47	30	14	17	20	945	26.25	1
AAAGTGCTTCCATGTTTTAGTGT_bta-miR-302a	83	282	144	125	194	233	267	300	195	97	247	469	96	195	318	171	115	102	49	216	70	82	125	164	152	86	60	115	168	239	77	191	295	100	146	97	6065	168.472	1
AAAGTTCTGAGACACTCCGACC_ssc-miR-148a-5p	6	11	2	17	13	21	22	40	15	8	26	20	18	12	9	11	26	13	10	2	7	5	33	20	14	9	5	38	20	25	11	20	35	6	13	12	575	15.9722	0
AAAGTTCTGAGACACTCCGACT_ssc-miR-148a-5p	30	72	15	77	126	137	116	114	73	48	163	254	57	65	96	67	76	54	40	39	18	48	100	119	60	70	40	132	69	94	46	111	120	25	85	54	2910	80.8333	1
AAATCAGTATGAATAAAGTCGTGATACTGTAAACGCTTTCTGATG_hsa-miR-3607-3p	19	10	3	23	42	9	21	33	30	79	43	17	17	19	38	68	34	44	63	16	35	7	40	8	44	45	47	67	49	19	17	124	12	10	89	20	1261	35.0278	1
AAATCAGTATGAATAAAGTCGTGATACTGTAAACGCTTTCTGATGTA_hsa-miR-3607-3p	14	2	1	34	30	8	9	14	12	89	22	8	16	8	42	97	64	45	75	5	18	2	40	3	46	31	42	53	48	14	10	105	8	14	92	11	1132	31.4444	1
AAATGGATTTTTGGA_bta-mir-1246	59	38	26	12	46	35	33	68	12	44	53	21	27	34	41	13	18	22	31	30	31	27	34	25	64	27	22	21	28	39	14	43	24	19	43	15	1139	31.6389	1
AAATGGATTTTTGGAG_bta-mir-1246	127	153	66	46	143	165	99	210	79	108	192	54	54	161	187	55	85	57	162	31	148	49	125	61	186	128	66	126	64	119	56	127	66	48	142	36	3781	105.028	1
AAATGGATTTTTGGAGC_bta-mir-1246	199	220	84	74	277	197	122	270	131	186	368	88	89	214	235	76	101	69	208	95	124	64	209	55	231	152	96	138	87	194	98	188	72	75	192	58	5336	148.222	1
AAATGGATTTTTGGAGCA_bta-mir-1246	8	7	6	8	5	29	16	22	10	6	5	7	16	29	4	1	32	2	10	5	38	1	18	8	9	4	4	16	13	17	6	18	16	28	3	3	430	11.9444	0
AAATGGATTTTTGGAGCC_bta-miR-1246	60	20	16	20	31	66	45	111	33	68	42	8	84	126	24	7	107	10	71	12	121	6	75	24	63	27	20	50	63	56	33	49	26	62	30	26	1692	47	1
AAATGGATTTTTGGAGCT_bta-miR-1246	276	164	97	99	210	271	166	346	158	422	236	55	209	509	163	64	300	63	322	71	383	55	264	114	203	124	98	172	203	222	147	203	133	202	129	59	6912	192	1
AAATGGATTTTTGGAGT_bta-miR-1246	21	26	11	31	23	69	53	102	33	17	53	16	50	64	14	2	44	10	31	10	47	10	112	21	27	19	6	73	28	78	34	33	34	39	21	18	1280	35.5556	1
AAATTCGTATCTAGGGGAAT_ssc-miR-10a-3p	0	33	8	10	11	16	35	2	7	5	31	17	9	8	7	4	15	5	1	20	3	6	3	9	16	13	1	2	12	15	17	7	46	16	8	14	432	12	0
AACACTGTCTGGTAAC_bta-miR-200a	10	30	16	161	92	70	290	27	63	247	205	33	109	122	285	302	206	156	34	28	66	15	108	37	278	369	60	99	64	125	68	260	38	17	324	70	4484	124.556	1
AACACTGTCTGGTAACG_bta-miR-200a	2	13	6	25	23	16	38	9	11	38	45	15	19	21	56	44	21	38	4	31	5	3	22	7	42	39	3	18	15	33	16	40	19	5	46	17	805	22.3611	1
AACACTGTCTGGTAACGAT_bta-miR-200a	3	12	9	31	15	26	65	8	15	24	50	48	20	24	26	18	28	28	7	24	9	12	27	18	62	30	13	12	13	33	47	40	62	16	26	33	934	25.9444	1
AACACTGTCTGGTAACGATG_bta-miR-200a	31	204	72	67	120	128	234	56	64	123	252	364	104	142	151	119	155	146	16	172	32	82	76	90	275	175	43	38	64	132	120	167	294	62	121	91	4582	127.278	1
AACACTGTCTGGTAACGATGA_bta-miR-200a	5	13	4	6	7	29	29	4	9	3	23	24	8	8	3	3	14	2	1	14	3	10	8	14	9	3	1	6	6	14	14	6	70	9	3	7	392	10.8889	0
AACACTGTCTGGTAACGATGAT_hsa-miR-200a-3p	5	30	11	0	36	61	44	14	12	0	46	84	1	17	35	0	0	1	0	34	7	18	2	23	0	0	0	0	0	33	2	1	108	0	0	0	625	17.3611	0
AACACTGTCTGGTAACGATGC_bta-miR-200a	11	92	30	99	62	172	237	55	67	41	163	120	89	86	41	50	106	44	10	96	38	47	104	84	100	50	15	59	70	125	108	97	317	59	40	99	3083	85.6389	1
AACACTGTCTGGTAACGATGCT_hsa-miR-200a-3p	10	25	6	7	18	59	28	12	13	2	37	65	1	22	19	4	3	2	2	38	2	26	14	15	4	5	4	5	6	21	5	11	86	4	3	1	585	16.25	0
AACACTGTCTGGTAACGATGT_bta-miR-200a	68	440	149	264	344	714	764	205	218	215	746	776	264	371	278	239	339	262	42	546	101	247	323	307	534	266	98	146	263	423	394	446	1126	271	229	332	12750	354.167	1
AACACTGTCTGGTAACGATGTA_bta-miR-200a	5	41	8	39	24	84	54	45	26	8	41	73	30	28	8	22	55	15	0	26	13	15	47	24	22	10	6	34	33	58	29	32	201	46	10	14	1226	34.0556	1
AACACTGTCTGGTAACGATGTC_bta-miR-200a	43	252	84	405	199	850	625	306	292	125	537	583	285	380	199	217	434	189	33	269	116	134	433	359	235	176	64	295	290	494	318	484	1405	265	153	206	11734	325.944	1
AACACTGTCTGGTAACGATGTG_bta-miR-200a	4	35	9	12	12	49	19	16	67	6	18	28	9	120	8	5	133	3	2	11	33	9	19	12	24	5	1	15	13	22	14	20	62	14	5	21	855	23.75	1
AACACTGTCTGGTAACGATGTT_bta-miR-200a	422	2131	807	1253	1843	3590	2063	1156	1127	992	3315	5657	964	1435	1873	1577	1455	1154	225	2647	422	1285	1496	1475	1540	1074	535	924	917	1916	1100	2474	5714	1083	1104	872	59617	1656.03	1
AACACTGTCTGGTAACGATGTTA_bta-miR-200a	7	24	12	11	27	31	8	9	4	15	32	81	8	13	27	11	4	11	4	32	5	16	9	14	14	20	3	8	9	28	12	29	67	6	17	6	634	17.6111	0
AACACTGTCTGGTAACGATGTTT_bta-miR-200a	1	37	12	13	29	50	51	20	10	8	43	36	11	17	22	15	17	19	1	26	6	28	14	30	29	15	5	5	12	33	25	32	71	19	10	23	795	22.0833	1
AACATAGCGAGACCCCGTCTCT_ssc-mir-1285	15	13	10	17	27	28	17	16	13	3	17	2	5	12	9	6	5	22	6	11	19	15	17	1	13	0	5	14	5	15	7	10	34	5	15	12	441	12.25	0
AACATAGCGAGACCCCGTCTCTT_ssc-mir-1285	41	14	25	23	51	69	27	45	35	0	38	12	11	32	29	20	19	42	39	39	58	23	49	3	30	1	9	40	23	53	31	24	55	22	16	31	1079	29.9722	1
AACATTCAACGCTGTCGGT_ssc-miR-181a	2	7	12	28	4	1	19	2	0	9	31	28	9	4	5	2	6	24	0	5	6	2	2	2	14	3	0	1	9	18	13	2	27	6	12	41	356	9.88889	0
AACATTCAACGCTGTCGGTG_ssc-miR-181a	2	62	11	6	5	9	23	0	2	6	30	33	6	14	13	6	13	9	8	14	3	6	4	12	33	11	3	4	12	8	16	7	27	16	7	19	460	12.7778	0
AACATTCAACGCTGTCGGTGA_ssc-miR-181a	6	118	11	5	22	16	54	11	9	28	63	51	12	18	12	9	24	29	1	26	5	14	3	12	43	24	1	5	23	35	15	27	64	19	15	37	867	24.0833	1
AACATTCAACGCTGTCGGTGAG_ssc-miR-181a	2	131	8	6	29	13	26	4	13	15	37	35	12	14	5	0	8	13	2	27	2	13	4	8	26	5	2	4	12	15	10	9	54	13	7	18	602	16.7222	0
AACATTCAACGCTGTCGGTGAGA_ssc-miR-181a	2	79	8	9	11	12	32	11	3	16	29	27	11	11	6	1	10	9	1	23	2	6	5	5	32	16	3	1	10	16	10	15	49	11	4	18	514	14.2778	0
AACATTCAACGCTGTCGGTGAGC_ssc-miR-181a	2	82	12	12	16	22	65	17	11	9	47	17	25	28	6	3	25	18	4	9	10	7	17	20	18	13	0	14	13	30	23	20	91	20	14	29	769	21.3611	1
AACATTCAACGCTGTCGGTGAGT_ssc-miR-181a	6	661	48	56	91	91	238	60	28	60	229	218	76	109	48	19	122	58	15	92	23	39	54	71	175	103	23	31	69	116	94	69	377	109	55	175	3908	108.556	1
AACATTCATTGCTGTCGGTGGGT_ssc-miR-181b	3	62	8	9	12	16	37	7	8	2	14	22	9	15	5	5	12	6	6	10	4	5	3	8	15	5	2	3	10	12	11	12	69	5	4	25	461	12.8056	0
AACATTCATTGTTGTCGGTGGGT_ssc-miR-181d-5p	1	31	6	5	4	9	23	16	8	4	25	29	8	11	6	2	5	3	0	23	1	4	6	3	22	6	2	4	10	17	5	3	61	10	5	6	384	10.6667	0
AACATTCATTGTTGTCGGTGGGTT_ssc-miR-181d-5p	1	17	7	11	2	2	45	11	8	8	17	17	7	8	2	4	13	2	1	16	1	2	0	2	28	11	2	2	11	15	5	7	38	9	4	8	344	9.55556	0
AACCCGTAGATCCGAACTTG_ssc-miR-100	1	24	8	7	12	5	58	8	6	10	18	23	8	20	6	5	24	13	1	12	6	7	8	7	51	30	0	2	0	12	22	7	20	6	15	10	472	13.1111	0
AACCCGTAGATCCGAACTTGT_ssc-miR-100	2	25	9	9	30	20	114	17	16	11	30	17	17	21	8	3	19	15	5	22	1	12	23	20	48	39	1	9	11	23	26	5	53	9	12	36	738	20.5	1
AACCCGTAGATCCGAACTTGTG_ssc-miR-100	6	52	17	42	34	39	292	25	27	67	67	53	54	57	28	37	78	64	7	38	11	24	19	27	225	141	17	13	32	60	66	34	80	15	53	56	1957	54.3611	1
AACCCGTAGATCCGATCT_ssc-miR-99a	0	8	5	23	9	7	44	3	6	5	25	20	22	7	3	3	16	67	0	14	5	4	11	15	37	16	4	5	12	18	55	5	17	9	35	93	628	17.4444	0
AACCCGTAGATCCGATCTT_ssc-miR-99a	2	23	23	33	9	15	106	11	9	11	33	55	16	20	16	8	18	30	7	22	3	9	6	7	37	19	4	11	16	32	28	17	45	8	14	38	761	21.1389	1
AACCCGTAGATCCGATCTTG_ssc-miR-99a	19	262	56	125	114	61	715	98	110	120	318	293	68	119	106	61	176	122	25	161	37	68	42	64	557	239	25	74	97	152	121	87	320	91	77	111	5291	146.972	1
AACCCGTAGATCCGATCTTGA_ssc-miR-99a	0	50	15	47	12	34	365	47	34	13	47	32	42	48	4	8	79	16	1	18	10	2	29	33	116	23	1	26	44	61	64	22	143	50	6	66	1608	44.6667	1
AACCCGTAGATCCGATCTTGC_ssc-miR-99a	28	360	99	579	109	175	3547	348	269	176	669	306	407	395	165	101	692	176	32	206	171	65	241	188	1192	463	57	206	345	616	595	286	1049	342	200	560	15415	428.194	1
AACCCGTAGATCCGATCTTGG_ssc-miR-99a	1	52	11	25	7	9	140	7	119	13	28	27	35	206	12	2	315	8	2	11	65	5	12	13	118	21	4	12	17	40	26	9	59	16	5	44	1496	41.5556	1
AACCCGTAGATCCGATCTTGT_ssc-miR-99a	143	2875	561	1575	885	703	12133	1276	1168	1197	3430	2510	1427	1604	992	684	2301	1078	159	1582	531	382	780	853	6434	2613	326	814	1298	2289	2107	1168	4042	1261	902	2186	66269	1840.81	1
AACCCGTAGATCCGATCTTGTA_ssc-miR-99a	7	98	13	48	13	25	222	46	20	23	65	107	32	32	25	13	34	13	3	59	11	15	11	20	112	38	8	23	36	54	34	27	193	38	19	36	1573	43.6944	1
AACCCGTAGATCCGATCTTGTAA_ssc-miR-99a	0	38	7	16	9	4	74	9	10	15	28	32	4	15	14	8	12	7	0	15	7	6	1	8	55	28	3	3	13	11	4	7	37	12	8	6	526	14.6111	0
AACCCGTAGATCCGATCTTGTG_ssc-miR-99a	59	1070	201	251	370	213	1805	347	345	351	1127	1174	180	323	231	157	399	226	41	770	130	195	124	194	1569	602	111	117	316	500	288	304	1294	281	174	306	16145	448.472	1
AACCCGTAGATCCGATCTTGTGA_ssc-miR-99a	79	2425	376	600	479	298	3612	641	535	652	1760	2284	348	518	566	383	655	309	68	1137	201	236	227	263	3053	1186	201	296	654	887	520	546	1818	491	308	550	29162	810.056	1
AACCCGTAGATCCGATCTTGTGAA_ssc-miR-99a	1	93	10	22	21	11	135	14	15	26	48	56	19	25	23	15	38	8	6	33	14	5	6	8	100	44	6	4	6	25	8	19	48	22	11	24	969	26.9167	1
AACCCGTAGATCCGATCTTGTGC_ssc-miR-99a	1	56	11	33	10	14	139	17	14	13	46	40	26	16	6	9	23	9	1	14	10	5	17	15	45	22	3	11	18	23	20	15	88	22	7	20	839	23.3056	1
AACCCGTAGATCCGATCTTGTGG_ssc-miR-99a	0	55	8	7	4	12	81	16	60	17	23	32	7	64	13	3	103	11	4	21	35	3	4	6	65	16	1	8	12	16	10	4	58	12	2	33	826	22.9444	1
AACCCGTAGATCCGATCTTGTGT_ssc-miR-99a	7	346	37	67	61	62	449	73	53	47	170	216	62	85	57	21	96	27	3	98	21	33	53	45	274	90	14	34	80	103	79	64	309	90	23	108	3457	96.0278	1
AACGCTTTCTGATGTA_hsa-mir-3607	32	23	9	17	41	18	14	33	24	37	44	21	3	18	43	36	12	20	41	25	35	11	22	14	25	20	23	37	21	39	7	79	32	11	52	14	953	26.4722	1
AACGGAATCCCAAAAGC_ssc-miR-191	10	25	10	13	17	9	14	16	8	18	25	41	8	12	6	3	11	8	2	16	5	11	4	7	13	8	7	5	12	16	1	14	25	9	13	4	426	11.8333	0
AACGGAATCCCAAAAGCAGC_ssc-miR-191	20	47	21	12	28	29	27	28	17	18	43	93	7	16	28	10	10	25	8	41	6	14	14	14	25	4	12	6	15	26	16	27	57	19	23	9	815	22.6389	1
AACGGAATCCCAAAAGCAGCA_ssc-miR-191	2	13	7	10	7	25	17	22	8	2	7	18	5	10	5	2	11	2	0	7	11	6	8	14	5	2	0	7	11	18	5	6	64	19	4	16	376	10.4444	0
AACGGAATCCCAAAAGCAGCC_ssc-miR-191	19	69	37	47	29	76	93	80	42	14	62	100	24	62	29	18	38	27	13	44	35	31	41	56	59	16	10	54	60	85	52	29	207	69	22	58	1807	50.1944	1
AACGGAATCCCAAAAGCAGCT_ssc-miR-191	99	430	184	147	206	341	290	259	149	82	327	498	98	206	132	76	125	144	47	304	84	154	125	173	214	73	61	114	186	290	156	139	661	209	98	166	7047	195.75	1
AACGGAATCCCAAAAGCAGCTA_ssc-miR-191	48	68	32	95	38	131	108	130	64	20	94	114	53	92	40	15	56	34	37	41	54	41	62	73	36	20	15	72	63	74	90	80	227	66	35	64	2382	66.1667	1
AACGGAATCCCAAAAGCAGCTG_ssc-miR-191	1058	1551	1097	1050	1646	1580	1283	1305	1002	1048	2037	2552	546	1228	1588	865	796	1314	1102	1439	849	1101	714	1007	1431	828	676	984	921	1147	753	1567	1902	682	1324	740	42713	1186.47	1
AACGGAATCCCAAAAGCAGCTGA_ssc-miR-191	27	38	28	4	20	28	17	26	14	13	30	64	8	8	10	16	11	15	15	22	15	20	12	13	20	10	2	10	16	25	8	14	45	17	13	12	666	18.5	0
AACGGAATCCCAAAAGCAGCTGT_ssc-miR-191	16	71	27	16	43	58	37	37	18	13	44	68	14	33	26	7	14	12	5	27	19	29	27	16	27	13	8	19	15	41	31	31	89	22	10	32	1015	28.1944	1
AACGGAATCCCAAAAGCAGCTT_ssc-miR-191	0	9	10	34	2	49	46	32	24	4	16	15	12	31	1	2	31	2	7	4	17	6	20	14	11	5	3	25	22	20	26	14	80	31	3	12	640	17.7778	0
AACTGTACTCCAGCCTGGGCAACATAGCGAGACCCCGTCTCTT_ssc-miR-1285	10	5	4	20	16	9	21	8	12	5	27	1	15	11	7	15	13	39	18	3	18	11	11	0	10	2	11	7	9	12	8	27	20	12	9	9	435	12.0833	0
AACTGTGGGGGCACTTT_ssc-miR-371-5p	29	23	25	35	27	47	29	34	26	26	37	12	13	42	29	19	23	32	17	22	32	13	42	34	31	27	29	40	31	40	30	54	32	12	28	21	1043	28.9722	1
AACTTATCAGACTGATGTTGAC_hsa-mir-21	6	18	7	19	17	23	23	8	10	27	38	32	12	18	28	23	24	23	7	19	5	14	11	16	30	17	7	22	14	27	6	27	19	10	22	18	647	17.9722	0
AAGAAGTTGACTGAAG_hsa-miR-3653-3p	26	22	19	60	61	21	80	24	38	78	92	11	46	78	125	71	55	67	98	30	59	12	35	24	108	111	33	67	32	38	32	71	22	16	137	36	1935	53.75	1
AAGCAGGGTCGGGCC_hsa-mir-7641-2	46	36	53	24	60	48	40	80	39	44	81	14	35	55	56	12	17	28	22	37	56	29	34	74	50	29	20	59	26	59	32	39	35	29	40	23	1461	40.5833	1
AAGCTCATCAGACTGATGTTGAC_hsa-mir-21	6	32	15	35	44	42	46	21	12	24	63	68	12	29	45	28	20	29	13	22	11	17	21	21	37	31	7	22	10	34	10	41	23	11	24	17	943	26.1944	1
AAGCTCGGTCTGAGGCCCCTC_bta-miR-423-3p	82	118	88	161	116	97	187	104	101	121	192	127	50	95	188	131	125	143	117	88	81	56	69	89	193	153	69	124	82	120	67	193	134	39	191	57	4148	115.222	1
AAGCTCGGTCTGAGGCCCCTCA_bta-miR-423-3p	11	72	30	54	35	27	61	35	30	50	65	76	15	27	44	52	38	48	23	34	31	16	30	14	63	42	16	20	35	42	19	40	70	16	59	16	1356	37.6667	1
AAGCTCGGTCTGAGGCCCCTCAG_ssc-miR-423-3p	63	124	85	94	129	88	130	120	100	137	205	178	47	106	155	110	81	139	61	129	102	74	46	72	156	128	63	84	88	116	55	138	118	49	139	60	3769	104.694	1
AAGCTCGGTCTGAGGCCCCTCAGA_ssc-miR-423-3p	35	49	45	64	53	50	75	59	37	48	78	86	25	44	69	42	32	56	42	32	33	27	26	43	88	66	32	64	41	52	35	51	69	30	80	31	1789	49.6944	1
AAGCTCGGTCTGAGGCCCCTCAGC_ssc-miR-423-3p	40	52	61	212	98	162	235	214	148	73	207	92	81	143	117	84	175	85	80	68	124	34	118	152	145	89	52	227	132	175	143	172	233	81	137	101	4542	126.167	1
AAGCTCGGTCTGAGGCCCCTCAGG_ssc-miR-423-3p	4	16	6	10	6	15	15	8	68	2	8	11	4	74	5	5	78	9	4	5	62	3	12	10	10	6	3	6	16	9	7	12	7	4	7	16	543	15.0833	0
AAGCTCGGTCTGAGGCCCCTCAGT_ssc-miR-423-3p	329	568	375	752	672	699	929	884	641	518	1021	826	340	652	834	480	522	668	480	485	497	337	469	605	763	488	308	794	574	708	483	886	964	349	664	422	21986	610.722	1
AAGCTCGGTCTGAGGCCCCTCAGTA_ssc-miR-423-3p	32	51	41	55	48	34	60	42	37	52	64	63	13	38	71	60	40	61	51	40	32	35	24	30	72	53	36	54	33	37	16	69	49	23	79	20	1615	44.8611	1
AAGCTCGGTCTGAGGCCCCTT_ssc-miR-423-3p	4	6	1	29	7	18	39	19	21	7	14	4	15	22	10	3	35	5	13	4	26	1	19	16	15	5	3	42	24	23	19	23	31	11	5	12	551	15.3056	0
AAGCTGCCAGTTGAAGAAC_ssc-miR-22-3p	20	31	33	82	41	27	93	19	33	79	72	40	49	40	45	29	34	118	46	32	26	14	24	27	90	81	16	30	36	91	78	56	30	14	129	82	1787	49.6389	1
AAGCTGCCAGTTGAAGAACC_ssc-miR-22-3p	3	13	26	101	15	40	84	21	17	33	52	25	23	34	11	16	66	27	20	17	33	5	36	42	43	32	5	55	57	94	61	57	51	24	24	46	1309	36.3611	1
AAGCTGCCAGTTGAAGAACT_ssc-miR-22-3p	30	92	147	216	154	158	292	107	94	196	212	145	100	141	125	57	148	180	54	110	112	41	118	152	199	154	64	141	179	301	139	193	201	79	161	174	5166	143.5	1
AAGCTGCCAGTTGAAGAACTG_ssc-miR-22-3p	15	24	37	12	44	50	32	24	14	30	48	107	11	20	31	11	9	23	11	63	7	27	10	42	26	20	11	9	19	27	13	35	49	15	17	11	954	26.5	1
AAGCTGCCAGTTGAAGAACTGA_ssc-miR-22-3p	51	153	123	173	148	345	245	240	144	107	230	378	89	167	106	77	165	126	40	155	96	121	167	238	127	63	36	145	165	276	142	225	339	118	96	149	5765	160.139	1
AAGCTGCCAGTTGAAGAACTGC_ssc-miR-22-3p	393	619	731	1693	1185	2598	2144	1720	1029	800	2011	1927	953	1471	823	680	1551	985	406	885	687	693	1822	1861	1298	672	345	1758	1210	2249	1222	1606	2631	869	864	1331	45722	1270.06	1
AAGCTGCCAGTTGAAGAACTGG_ssc-miR-22-3p	24	105	63	56	87	181	80	93	322	46	103	116	59	618	39	36	620	50	20	66	336	38	103	133	138	26	24	77	74	131	58	69	175	68	22	136	4392	122	1
AAGCTGCCAGTTGAAGAACTGT_ssc-miR-22-3p	2689	4491	4601	5289	9011	11201	8201	6905	4223	4650	10718	14624	3163	5982	5708	4285	4808	6081	1986	6429	2434	4674	6659	8408	6471	3880	2212	5526	4790	9578	4120	7890	10712	3660	4950	5337	216346	6009.61	1
AAGCTGCCAGTTGAAGAACTGTA_ssc-miR-22-3p	64	116	118	77	173	183	102	94	61	76	201	448	47	101	102	72	48	102	45	129	33	102	80	111	77	55	50	56	74	113	61	131	131	52	99	72	3656	101.556	1
AAGCTGCCAGTTGAAGAACTGTT_ssc-miR-22-3p	5	34	34	20	57	73	35	30	12	28	49	60	24	47	36	30	28	42	5	15	15	29	35	37	30	13	10	25	32	46	21	43	59	22	27	25	1133	31.4722	1
AAGCTGGGTTGAGAGGGCGAA_ssc-miR-320	14	22	21	4	10	12	7	10	7	3	18	37	1	13	11	7	2	10	6	7	4	13	7	10	9	3	6	4	4	7	9	9	17	5	18	9	356	9.88889	0
AAGCTGGGTTGAGAGGGCGAAA_ssc-miR-320	24	33	12	11	17	16	11	22	13	8	15	46	5	10	15	9	5	9	16	20	10	13	6	8	12	7	11	8	7	8	7	9	29	7	7	8	474	13.1667	0
AAGCTTACCAGACTGATGTTGAC_hsa-mir-21	11	49	28	26	66	43	67	25	14	42	88	88	16	40	56	34	31	57	20	51	10	20	27	35	54	37	20	28	24	61	16	40	37	17	41	28	1347	37.4167	1
AAGCTTATCAGACCGATGTTGAC_hsa-mir-21	5	47	16	33	62	39	59	24	12	36	72	77	14	36	57	50	36	41	13	39	12	30	25	35	47	41	14	18	24	44	19	49	42	17	43	25	1253	34.8056	1
AAGCTTATCAGACTGACGTTGAC_hsa-mir-21	13	27	21	24	34	44	48	23	9	31	54	58	3	18	43	36	32	33	9	21	16	20	19	28	40	32	10	14	12	35	17	32	28	19	35	20	958	26.6111	1
AAGCTTATCAGACTGATG_hsa-mir-21	8	14	7	37	43	34	68	11	10	59	72	31	34	28	58	34	34	102	20	19	14	9	32	21	86	63	19	32	28	60	29	57	10	6	83	79	1351	37.5278	1
AAGCTTATCAGACTGATGCTGAC_hsa-mir-21	8	48	22	28	71	40	59	11	16	44	63	77	14	21	53	53	21	36	7	31	13	21	35	42	45	30	11	13	29	49	12	50	28	20	38	18	1177	32.6944	1
AAGCTTATCAGACTGATGT_hsa-mir-21	6	39	18	21	24	35	60	22	15	19	55	66	14	19	23	8	32	48	3	40	3	16	11	30	53	22	5	14	32	42	31	21	78	16	30	62	1033	28.6944	1
AAGCTTATCAGACTGATGTT_hsa-mir-21	2	11	10	18	20	21	38	11	10	18	43	40	17	15	5	10	19	58	1	19	2	14	11	19	25	10	7	6	11	34	19	13	50	11	22	54	694	19.2778	0
AAGCTTATCAGACTGATGTTA_hsa-mir-21	1	17	9	14	6	20	30	15	4	3	27	39	8	9	1	3	12	6	0	9	2	6	14	14	20	6	3	3	17	27	25	8	104	20	1	20	523	14.5278	0
AAGCTTATCAGACTGATGTTG_hsa-mir-21	41	532	135	121	284	225	350	142	132	168	600	781	93	164	157	100	240	248	24	415	46	169	100	241	395	211	55	71	153	285	139	189	854	178	160	284	8482	235.611	1
AAGCTTATCAGACTGATGTTGA_hsa-mir-21	71	848	221	99	406	354	371	220	137	184	815	1240	90	224	217	110	159	256	25	601	46	325	142	302	360	185	85	80	211	338	157	238	1237	253	113	277	10997	305.472	1
AAGCTTATCAGACTGATGTTGAA_hsa-mir-21	23	224	53	124	108	244	330	141	77	60	259	261	82	129	87	61	161	91	24	118	35	70	160	175	184	66	25	93	109	257	101	137	360	151	62	136	4778	132.722	1
AAGCTTATCAGACTGATGTTGAC_hsa-mir-21	3460	12787	5273	8859	17202	12929	18949	8048	6443	11118	22844	23440	3998	8608	17793	14868	10081	12945	4124	11442	3710	7548	9280	10615	14627	11841	4109	6781	7473	14216	4678	15422	12908	5357	12936	7228	383940	10665	1
AAGCTTATCAGACTGATGTTGACA_hsa-mir-21	302	1553	438	410	1071	819	1014	625	387	492	1474	2350	230	513	965	677	513	760	220	813	207	554	492	664	801	493	233	322	513	818	277	753	1162	400	543	379	24237	673.25	1
AAGCTTATCAGACTGATGTTGACC_hsa-mir-21	87	362	161	414	492	492	737	297	213	278	594	620	232	469	351	292	400	426	165	216	163	225	438	320	389	267	114	273	292	416	232	407	418	200	480	362	12294	341.5	1
AAGCTTATCAGACTGATGTTGACG_hsa-mir-21	14	97	31	33	63	73	81	40	108	29	69	84	21	196	46	23	189	42	5	42	94	32	33	52	72	19	9	23	30	60	27	48	91	31	35	46	1988	55.2222	1
AAGCTTATCAGACTGATGTTGACT_hsa-mir-21	166	1118	317	647	805	970	1697	571	468	527	1199	1307	372	812	677	531	748	639	196	500	289	324	792	728	805	563	204	463	576	972	499	714	1109	495	540	696	24036	667.667	1
AAGCTTATCAGACTGATGTTGAT_hsa-mir-21	142	900	315	1923	575	2567	4219	1494	1116	502	1721	1258	911	1651	624	516	2062	484	294	395	631	332	2006	1853	1090	428	173	1372	1305	2613	1093	1226	2593	1488	578	1397	43847	1217.97	1
AAGCTTATCAGACTGATGTTGG_hsa-mir-21	3	15	2	5	4	10	4	4	13	1	7	11	2	25	2	1	25	3	0	13	10	5	1	3	10	3	2	2	1	4	5	9	20	4	2	4	235	6.52778	0
AAGCTTATCAGACTGGTGTTGAC_hsa-mir-21	16	57	20	35	82	53	96	37	27	37	99	89	16	38	88	44	38	54	22	48	12	28	34	52	68	55	10	26	32	60	22	72	40	22	57	32	1618	44.9444	1
AAGCTTATCAGGCTGATGTTGAC_hsa-mir-21	8	62	22	34	60	47	63	25	19	44	67	86	20	21	48	48	37	58	18	22	15	25	34	22	45	29	21	20	22	51	15	52	45	18	47	25	1295	35.9722	1
AAGCTTATCGGACTGATGTTGAC_hsa-mir-21	12	43	31	30	77	36	83	30	32	46	98	100	15	30	74	56	41	40	16	39	12	29	37	55	59	47	15	34	37	60	21	45	59	23	49	24	1535	42.6389	1
AAGCTTGTCAGACTGATGTTGAC_hsa-mir-21	6	25	9	13	21	22	26	12	11	18	27	38	8	16	28	13	18	17	5	16	6	13	15	22	16	24	7	15	16	16	4	14	16	6	12	11	562	15.6111	0
AAGGAGCTCACAGTCTATTG_ssc-miR-28-5p	61	131	78	89	115	104	132	73	83	101	172	197	35	95	189	72	94	157	77	103	31	61	41	99	118	93	49	90	55	113	33	134	106	33	127	56	3397	94.3611	1
AAGGAGCTCACAGTCTATTGA_ssc-miR-28-5p	30	74	23	26	40	33	42	24	24	27	63	139	10	28	41	26	13	42	19	52	7	38	17	56	35	22	15	16	19	45	15	40	84	20	30	29	1264	35.1111	1
AAGGAGCTCACAGTCTATTGAA_ssc-miR-28-5p	14	32	17	14	19	27	30	42	12	6	35	69	14	16	14	6	14	22	12	22	5	12	12	33	27	11	4	21	9	31	9	29	57	23	13	16	749	20.8056	1
AAGGAGCTCACAGTCTATTGAG_ssc-miR-28-5p	281	375	261	152	344	342	253	277	231	261	516	779	84	219	400	220	147	386	206	420	100	282	106	311	319	226	120	244	162	285	121	387	437	139	277	150	9820	272.778	1
AAGGAGCTCACAGTCTATTGAGA_ssc-miR-28-5p	82	140	78	28	139	85	63	106	63	51	156	309	23	54	152	55	29	148	45	141	27	101	39	94	81	48	35	67	44	100	37	119	124	41	82	39	3025	84.0278	1
AAGGTGCATCTAGTGCAGATAG_ssc-miR-18a	35	90	62	21	88	112	30	61	36	30	98	208	12	26	65	55	23	65	17	104	17	71	25	62	68	30	22	42	35	77	20	88	135	39	29	32	2030	56.3889	1
AAGTCGTGATACTGTAAACGCTTTCTGATG_hsa-miR-3607-3p	16	12	4	5	21	2	10	13	17	17	23	12	7	11	33	18	9	16	23	11	16	9	12	5	8	13	18	13	24	13	6	37	10	2	26	2	494	13.7222	0
AAGTCGTGATACTGTAAACGCTTTCTGATGTA_hsa-miR-3607-3p	3	6	10	7	11	6	6	20	7	27	27	11	1	9	31	22	16	14	27	9	12	4	9	2	13	10	10	28	10	12	3	29	4	5	35	1	457	12.6944	0
AAGTGCCGCCATTTTTTG_ssc-mir-371	0	18	13	0	27	0	0	22	0	12	0	2	0	12	0	2	10	21	4	0	1	23	13	18	12	0	0	16	39	28	12	20	0	16	0	7	348	9.66667	0
AAGTGCCGCCATTTTTTGAGT_ssc-mir-371	0	23	15	0	31	1	0	32	0	10	0	0	0	29	1	0	13	11	8	0	0	11	20	23	8	2	0	11	49	44	17	22	0	26	1	14	422	11.7222	0
AAGTGCCGCCATTTTTTGAGTG_ssc-mir-371	0	86	62	0	82	0	0	42	0	39	1	0	1	54	0	0	26	34	5	0	0	46	45	46	32	3	0	24	89	56	21	59	0	47	1	28	929	25.8056	1
AAGTGCCGCCATTTTTTGAGTGT_ssc-mir-371	1	235	218	2	462	2	3	389	3	132	2	2	1	289	5	1	136	152	46	1	4	269	296	335	157	2	2	174	506	394	184	308	4	313	3	203	5236	145.444	1
AAGTGCTTCCATGTTTC_bta-miR-302c	6	13	20	33	19	33	34	36	17	10	20	54	14	26	33	13	19	15	11	16	7	2	20	23	14	13	8	24	19	35	17	27	31	12	11	22	727	20.1944	1
AAGTGCTTCCATGTTTCAGT_bta-miR-302c	9	37	18	19	37	31	42	31	21	18	42	59	8	16	42	25	12	30	5	30	9	10	31	19	19	19	12	14	35	48	12	36	43	10	22	22	893	24.8056	1
AAGTGCTTCCATGTTTCAGTG_bta-miR-302c	35	145	91	31	94	73	76	75	36	64	119	228	28	67	134	83	53	79	18	121	23	37	44	57	102	65	48	32	76	136	31	91	75	21	87	31	2606	72.3889	1
AAGTGCTTCCATGTTTCAGTGA_bta-miR-302c	20	57	21	21	32	30	16	41	18	15	43	93	11	22	17	21	12	34	5	34	4	13	21	18	14	15	12	15	27	18	14	29	60	20	20	10	873	24.25	1
AAGTGCTTCCATGTTTCAGTGG_bta-miR-302c	177	311	222	105	240	245	150	259	156	114	324	812	57	132	341	222	121	288	72	406	45	146	112	197	190	141	132	100	151	209	100	409	329	116	211	125	7467	207.417	1
AAGTGCTTCCATGTTTCAGTGGA_bta-miR-302c	25	53	29	18	49	38	36	35	17	16	43	148	29	22	62	41	20	51	15	42	6	23	29	55	33	32	14	21	29	42	25	65	59	11	33	23	1289	35.8056	1
AAGTGCTTCCATGTTTCAGTGGC_bta-miR-302c	12	42	24	32	62	134	87	91	42	33	85	79	40	66	90	71	47	46	10	32	12	31	93	98	49	43	18	58	53	98	70	102	87	27	70	60	2094	58.1667	1
AAGTGCTTCCATGTTTCAGTGGT_bta-miR-302c	72	236	150	130	377	515	259	290	179	129	326	605	173	282	607	376	160	232	60	256	64	231	376	406	214	166	80	152	248	425	238	480	294	109	303	246	9446	262.389	1
AAGTGCTTCCATGTTTCAGTGT_bta-miR-302c	4	17	8	15	27	31	12	33	11	9	17	27	10	21	20	17	12	15	5	30	4	11	22	22	7	9	6	9	22	28	20	19	37	17	25	10	609	16.9167	0
AAGTGCTTCCATGTTTT_bta-miR-302d	38	156	74	91	146	125	123	129	96	49	146	264	50	100	125	102	64	123	20	90	22	57	80	97	86	39	54	84	77	156	76	142	152	46	104	80	3463	96.1944	1
AAGTGCTTCCATGTTTTAG_bta-miR-302d	8	17	20	8	21	25	15	12	7	12	16	53	6	15	15	21	5	22	2	27	3	12	12	16	21	9	14	6	12	21	3	34	12	8	24	9	543	15.0833	0
AAGTGCTTCCATGTTTTAGA_bta-miR-302d	9	29	16	32	18	90	52	51	39	5	24	83	20	44	17	14	37	27	11	20	15	22	19	47	21	9	2	33	35	42	44	26	111	42	14	23	1143	31.75	1
AAGTGCTTCCATGTTTTAGC_bta-miR-302d	256	445	336	604	416	820	802	984	492	225	675	794	348	573	553	374	398	430	196	447	261	240	492	586	397	218	190	560	523	689	482	823	1061	355	420	515	17980	499.444	1
AAGTGCTTCCATGTTTTAGCAG_bta-miR-302d	13	20	19	23	23	13	10	22	16	6	24	29	4	12	26	9	5	13	9	24	2	9	8	10	19	10	5	10	6	14	9	29	19	5	15	7	497	13.8056	0
AAGTGCTTCCATGTTTTAGG_bta-miR-302d	8	53	21	23	20	54	28	41	170	9	25	55	8	230	14	13	154	23	4	34	107	13	23	33	40	13	9	23	32	51	20	42	62	27	11	49	1542	42.8333	1
AAGTGCTTCCATGTTTTAGT_bta-miR-302d	1471	3691	2238	1992	3109	3802	3123	3909	2234	1305	3471	6711	1184	2526	3969	2222	1384	2306	991	3253	828	1674	1684	2705	2242	1285	1126	2039	2054	2933	1582	4045	4289	1499	2179	1961	89016	2472.67	1
AAGTGCTTCCATGTTTTAGTA_bta-miR-302b	103	322	198	91	284	215	127	247	108	107	263	670	55	163	275	160	64	198	53	338	36	180	89	170	146	96	109	113	147	168	96	267	274	78	171	111	6292	174.778	1
AAGTGCTTCCATGTTTTAGTAA_bta-miR-302b	309	692	437	479	476	1031	606	1026	467	199	729	1416	327	600	539	251	314	390	160	553	201	276	374	659	349	181	166	505	532	685	448	723	1471	406	328	445	18750	520.833	1
AAGTGCTTCCATGTTTTAGTAC_bta-miR-302b	100	98	90	52	104	54	70	67	30	54	132	223	27	35	163	69	36	110	52	141	27	72	33	45	91	29	54	69	46	59	42	199	90	37	87	27	2714	75.3889	1
AAGTGCTTCCATGTTTTAGTAG_bta-miR-302b	8109	13891	10820	6255	14298	11538	7767	12935	7946	6934	16638	27350	3567	8710	20365	10151	4632	12351	4993	17015	3361	8431	4316	8981	9857	6694	6218	6800	7453	9129	5015	19333	14444	4281	11082	6096	357756	9937.67	1
AAGTGCTTCCATGTTTTAGTAGA_bta-miR-302b	922	2851	1386	1427	2252	1422	1681	1822	1231	1420	2671	4349	737	1574	3892	2551	831	2221	1112	1862	636	989	1061	1232	1922	1591	1148	1349	1301	1606	913	3185	1412	630	2698	971	60858	1690.5	1
AAGTGCTTCCATGTTTTAGTAGAA_ENSSSCG00000018952	32	81	31	33	57	35	65	55	32	44	74	130	32	33	79	52	19	55	30	51	17	28	18	30	61	55	41	37	22	58	31	79	44	14	61	39	1655	45.9722	1
AAGTGCTTCCATGTTTTAGTAGC_bta-miR-302b	6	5	7	13	15	35	16	34	4	3	16	23	13	39	16	17	14	17	9	8	9	9	19	8	20	7	5	20	10	28	17	22	18	12	14	15	543	15.0833	0
AAGTGCTTCCATGTTTTAGTAGG_bta-miR-302b	10	41	25	18	31	27	30	34	114	12	38	35	19	153	35	23	105	14	7	19	73	7	31	22	39	9	14	13	21	40	16	28	26	12	16	31	1188	33	1
AAGTGCTTCCATGTTTTAGTAGT_bta-miR-302b	20	88	71	64	120	160	92	123	73	43	108	119	48	108	115	86	46	60	24	86	32	82	109	91	54	42	26	61	89	102	69	127	115	52	86	71	2862	79.5	1
AAGTGCTTCCATGTTTTAGTAT_bta-miR-302b	12	38	25	75	19	144	96	157	59	1	53	37	33	69	28	15	52	18	16	19	36	15	57	59	26	5	5	102	69	97	46	71	193	74	8	61	1890	52.5	1
AAGTGCTTCCATGTTTTAGTG_bta-miR-302a	111	522	242	105	425	307	205	263	196	169	328	957	84	302	455	360	97	284	103	360	62	186	184	193	261	155	147	120	184	209	115	342	245	99	331	143	8851	245.861	1
AAGTGCTTCCATGTTTTAGTGA_bta-miR-302a	647	2611	1101	750	1924	1384	1140	1467	828	860	1839	4384	479	1092	2618	1765	574	1263	455	1671	334	877	759	906	1287	918	693	798	1024	1273	644	2007	1472	551	1541	719	44655	1240.42	1
AAGTGCTTCCATGTTTTAGTGAA_bta-miR-302a	10	58	25	26	46	50	26	42	24	17	58	129	9	42	59	44	7	30	23	48	8	25	20	16	27	29	19	23	35	39	19	63	34	11	48	11	1200	33.3333	1
AAGTGCTTCCATGTTTTAGTGC_bta-miR-302a	33	145	73	100	83	136	185	213	117	53	161	225	73	114	175	108	110	74	29	99	39	41	93	113	96	100	42	104	123	147	87	163	173	63	102	88	3880	107.778	1
AAGTGCTTCCATGTTTTAGTGG_bta-miR-302a	45	134	84	32	69	96	61	101	154	24	112	177	22	205	105	43	149	42	23	116	87	54	42	57	56	23	24	39	46	82	21	89	114	26	34	51	2639	73.3056	1
AAGTGCTTCCATGTTTTAGTGT_bta-miR-302a	184	623	299	303	462	487	588	534	390	243	564	958	198	368	650	467	257	256	118	443	136	183	336	346	382	258	189	324	405	534	248	577	647	266	341	284	13848	384.667	1
AAGTGGTTTTACCCTATGGTAG_ssc-miR-140-5p	13	22	18	8	34	16	15	22	4	16	37	54	1	11	21	15	6	18	2	23	7	16	14	23	18	6	4	6	9	23	7	21	40	6	8	7	571	15.8611	0
AAGTTCTGAGACACTCCGACT_ssc-miR-148a-5p	4	10	3	13	29	28	21	15	19	16	25	51	6	12	17	10	15	13	10	6	1	10	17	12	16	12	5	28	10	12	9	21	23	4	11	12	526	14.6111	0
AATACTGCCGGGTAATGAT_bta-miR-200c	1	26	4	4	4	6	35	7	5	1	30	19	6	3	3	2	2	5	0	11	1	3	4	4	10	4	0	0	7	14	11	4	41	13	2	11	303	8.41667	0
AATACTGCCGGGTAATGATG_bta-miR-200c	20	224	46	63	60	38	193	30	51	75	133	153	41	72	31	13	57	50	18	93	27	42	17	36	193	85	18	11	36	68	76	39	229	49	31	85	2503	69.5278	1
AATACTGCCGGGTAATGATGG_bta-miR-200c	7	150	26	22	31	24	55	17	24	18	82	137	15	44	14	7	33	16	1	59	8	21	10	15	56	30	8	6	27	36	24	19	176	29	11	42	1300	36.1111	1
AATACTGCCGGGTAATGATGGA_bta-miR-200c	84	1817	233	246	344	209	1060	278	204	364	1052	1100	215	284	196	104	391	224	40	592	91	268	99	243	1002	485	105	132	352	434	304	291	1768	464	198	504	15777	438.25	1
AATACTGCCGGGTAATGATGGAA_bta-miR-200c	7	121	21	18	24	13	66	20	13	24	78	67	7	16	17	10	43	14	4	47	11	13	5	9	73	34	9	10	14	30	13	23	122	24	15	26	1061	29.4722	1
AATACTGCCGGGTAATGATGGAT_bta-miR-200c	2	109	4	25	12	20	62	12	12	21	43	45	15	19	13	4	30	11	3	21	2	9	12	17	51	38	3	5	24	21	20	14	114	30	14	39	896	24.8889	1
AATACTGCCGGGTAATGATGGG_bta-miR-200c	2	43	5	7	1	6	14	9	22	5	20	8	6	35	1	2	70	4	0	4	11	3	3	6	27	7	0	3	8	6	8	6	47	9	1	14	423	11.75	0
AATACTGCCGGGTAATGATGGT_bta-miR-200c	0	31	6	4	6	6	39	6	5	10	17	18	4	13	2	1	12	4	0	13	1	3	10	7	13	3	3	3	11	12	16	10	49	18	8	15	379	10.5278	0
AATACTGCCTGGTAATGATA_bta-miR-200b	2	30	10	16	7	17	32	10	4	2	32	39	16	25	3	1	11	5	0	18	3	10	3	9	17	5	1	3	7	13	16	15	100	18	7	19	526	14.6111	0
AATACTGCCTGGTAATGATG_bta-miR-200b	44	725	150	115	273	245	447	147	126	165	601	779	139	248	244	168	181	213	25	439	70	201	99	161	431	215	58	78	156	240	198	255	763	170	202	239	9010	250.278	1
AATACTGCCTGGTAATGATGA_bta-miR-200b	52	466	172	92	306	497	155	111	106	74	508	1065	85	148	202	204	102	124	22	452	26	282	122	155	178	121	91	81	106	198	96	272	868	149	101	83	7872	218.667	1
AATACTGCCTGGTAATGATGAA_hsa-miR-200b-3p	5	45	21	37	14	79	45	28	22	20	54	81	15	32	21	23	39	14	10	35	10	21	30	23	29	19	8	22	20	29	25	41	121	38	16	14	1106	30.7222	1
AATACTGCCTGGTAATGATGAC_hsa-miR-200b-3p	1073	4290	1349	3243	3799	4492	4312	1706	2528	2958	6876	8339	1634	2607	6574	5443	3333	2523	1047	4153	1202	2203	2355	1822	3784	4220	1557	1711	1615	2976	1575	5554	6631	1431	4309	1112	116336	3231.56	1
AATACTGCCTGGTAATGATGACG_hsa-mir-200b	29	271	54	106	161	120	212	53	245	107	218	267	83	438	244	191	454	85	32	107	191	62	105	73	175	183	62	62	70	124	94	192	208	57	203	73	5411	150.306	1
AATACTGCCTGGTAATGATGAT_hsa-miR-200b-3p	39	321	89	657	146	829	836	303	354	124	469	406	339	455	211	185	712	93	52	154	172	93	438	291	264	128	65	330	294	519	316	410	1183	327	174	208	11986	332.944	1
AATACTGCCTGGTAATGATGCC_hsa-miR-200b-3p	4	31	12	0	17	37	23	10	10	0	37	50	1	17	29	0	0	0	0	27	3	14	0	6	1	2	0	0	0	25	0	0	32	0	2	0	390	10.8333	0
AATACTGCCTGGTAATGATGGC_hsa-miR-200b-3p	6	23	7	16	26	23	24	20	16	13	44	56	4	14	27	25	8	8	7	36	4	13	10	10	18	15	9	10	8	16	9	25	42	5	28	6	631	17.5278	0
AATACTGCCTGGTAATGATGT_bta-miR-200b	3	32	6	11	15	29	21	11	5	4	36	51	12	9	8	8	11	8	1	19	3	13	6	11	16	4	4	6	9	18	9	8	80	12	6	20	525	14.5833	0
AATACTGCCTGGTAATGATGTC_hsa-miR-200b-3p	5	18	4	0	13	24	19	5	11	1	26	33	0	15	19	2	5	1	1	8	4	11	6	8	2	3	2	0	1	10	1	4	24	2	2	2	292	8.11111	0
AATACTGTCTGGTAATGCCG_ssc-miR-429	12	73	28	16	39	48	38	20	21	37	75	141	22	35	44	36	20	27	1	84	11	42	17	23	62	36	21	16	23	41	11	56	146	19	32	12	1385	38.4722	1
AATACTGTCTGGTAATGCCGA_ssc-miR-429	0	7	3	3	4	26	14	6	2	3	14	31	2	9	3	0	5	5	0	12	2	6	3	5	5	1	2	7	2	8	2	4	45	9	1	1	252	7	0
AATACTGTCTGGTAATGCCGC_ssc-miR-429	18	50	16	75	31	132	116	74	58	25	102	140	36	46	50	44	80	31	5	57	13	21	55	59	54	28	14	48	40	82	42	69	261	53	36	29	2090	58.0556	1
AATACTGTCTGGTAATGCCGT_ssc-miR-429	88	330	142	225	258	550	296	203	217	163	572	874	146	214	297	245	247	173	33	457	57	187	199	229	264	140	103	146	178	331	142	381	939	194	164	118	9502	263.944	1
AATAGCCACTGTACT_ssc-mir-1285	15	5	7	15	18	16	30	10	22	3	21	3	17	42	14	9	12	24	23	11	37	4	27	3	12	0	5	22	9	18	15	10	9	6	16	11	521	14.4722	0
AATAGCCACTGTACTCC_ssc-mir-1285	31	8	11	12	12	6	28	6	16	1	28	0	10	23	17	17	9	22	40	11	32	6	27	0	17	5	8	20	8	16	5	22	3	10	24	5	516	14.3333	0
AATAGCCACTGTACTCCAGCC_ssc-mir-1285	7	0	7	36	17	5	13	1	1	1	102	4	0	1	0	22	4	0	4	1	4	5	8	0	1	2	4	6	0	12	1	59	9	13	3	3	356	9.88889	0
AATAGCCACTGTACTCCAGCCTGGGC_ssc-mir-1285	48	21	19	28	50	25	30	13	27	5	50	2	16	23	19	18	13	41	22	14	45	20	45	10	14	2	12	19	10	39	19	49	14	14	13	23	832	23.1111	1
AATAGCCACTGTACTCCAGCCTGGGCAACATAGCGAGACCCC_ssc-mir-1285	16	8	6	23	6	12	14	5	16	34	17	2	5	25	25	6	9	17	42	11	13	3	20	10	37	48	14	20	4	17	9	21	2	3	30	7	557	15.4722	0
AATAGCCACTGTACTCCAGCCTGGGCAACATAGCGAGACCCCGTC_ssc-miR-1285	26	5	22	20	12	13	11	12	13	15	10	5	15	20	10	6	7	35	25	9	36	7	16	10	34	14	17	23	21	9	9	30	11	7	17	15	567	15.75	0
AATAGCCACTGTACTCCAGCCTGGGCAACATAGCGAGACCCCGTCT_ssc-miR-1285	7	26	25	20	7	8	9	28	16	79	7	3	16	48	15	8	16	14	14	7	7	3	34	51	55	32	12	36	47	7	31	10	7	12	17	37	771	21.4167	1
AATAGCCACTGTACTCCAGCCTGGGCAACATAGCGAGACCCCGTCTCT_ssc-miR-1285	28	18	33	33	55	69	22	29	26	8	37	6	31	22	7	12	18	68	12	28	39	16	71	8	25	5	27	31	26	33	60	46	55	41	29	34	1108	30.7778	1
AATAGCCACTGTACTCCAGCCTGGGCAACATAGCGAGACCCCGTCTCTA_ssc-miR-1285	133	63	118	53	293	181	77	57	36	44	130	56	122	58	17	122	69	145	84	124	79	101	200	41	88	35	169	143	77	91	189	220	139	97	137	115	3903	108.417	1
AATAGCCACTGTACTCCAGCCTGGGCAACATAGCGAGACCCCGTCTCTC_ssc-miR-1285	37	2	19	41	44	82	79	68	77	9	34	8	110	73	17	18	88	113	70	17	136	8	202	13	57	5	35	159	87	83	154	69	71	55	55	134	2329	64.6944	1
AATAGCCACTGTACTCCAGCCTGGGCAACATAGCGAGACCCCGTCTCTG_ssc-miR-1285	9	5	6	2	9	9	2	2	25	1	4	0	10	26	1	1	24	8	5	6	40	2	20	2	9	0	6	7	6	7	13	9	11	5	2	15	309	8.58333	0
AATAGCCACTGTACTCCAGCCTGGGCAACATAGCGAGACCCCGTCTCTT_ssc-miR-1285	346	137	173	153	422	421	236	259	358	93	192	85	382	301	232	191	288	954	491	269	397	131	795	53	401	64	346	618	328	377	464	418	284	244	367	495	11765	326.806	1
AATAGCCACTGTACTCCAGCCTGGGCAACATAGCGAGACCCCGTCTCTTA_ssc-miR-1285	128	30	55	39	120	133	22	56	43	17	69	29	54	42	27	55	36	242	63	100	53	64	104	9	114	6	98	89	87	89	96	159	98	58	60	84	2628	73	1
AATAGCCACTGTACTCCAGCCTGGGCAACATAGCGAGACCCCGTCTCTTT_ssc-miR-1285	37	9	17	18	26	43	12	34	28	10	19	9	33	28	20	22	27	102	42	25	21	12	71	2	42	13	32	68	28	42	57	38	22	35	42	47	1133	31.4722	1
AATCACTAACCACACGGCCAG_hsa-miR-34c-3p	0	22	4	3	8	1	29	8	4	12	30	39	0	3	8	0	4	1	0	19	2	2	0	0	36	5	1	2	7	19	1	4	22	7	0	2	305	8.47222	0
AATCACTAACCACACGGCCAGA_hsa-miR-34c-3p	0	14	3	6	3	3	34	14	9	3	24	42	3	2	5	3	10	0	0	12	1	1	0	1	14	2	0	3	6	12	4	2	21	12	2	3	274	7.61111	0
AATCACTAACCACACGGCCAGG_hsa-miR-34c-3p	3	99	42	24	40	24	266	83	63	72	235	370	15	52	61	33	64	8	1	140	16	12	8	8	204	65	30	16	108	164	26	35	162	56	28	10	2643	73.4167	1
AATCACTAATTCCACTGCCAT_ENSSSCG00000027451	4	28	7	6	7	7	59	15	8	6	43	71	4	4	7	6	4	3	0	44	4	0	1	2	31	8	2	5	21	34	3	3	49	20	0	4	520	14.4444	0
AATCACTAATTCCACTGCCATC_ENSSSCG00000027451	24	458	165	149	127	77	1250	265	193	233	964	1329	54	130	169	96	205	30	7	608	65	58	30	28	788	198	39	72	337	482	48	157	791	243	49	38	9956	276.556	1
AATCACTAATTCCACTGCCATCA_ENSSSCG00000027451	0	84	23	14	16	8	120	24	22	24	110	211	3	6	30	8	10	7	0	92	14	7	2	1	102	25	4	6	14	57	5	13	95	17	11	5	1190	33.0556	1
AATCAGACTGATGTTGAC_hsa-mir-21	4	3	3	31	24	9	69	6	11	51	41	3	14	21	50	50	27	39	22	12	12	1	19	10	39	52	11	26	19	31	9	49	6	6	61	16	857	23.8056	1
AATCCTTGGAACCTAGGTGTGAGT_ssc-miR-362	13	24	36	24	47	54	33	44	9	13	70	104	8	26	30	26	26	32	10	69	12	33	27	58	42	13	12	22	29	48	22	41	75	23	17	20	1192	33.1111	1
AATCCTTGGAACCTAGGTGTGAGTG_ssc-miR-362	6	27	21	10	14	12	7	16	13	10	26	59	1	14	14	8	7	9	1	21	14	7	7	7	7	14	6	12	23	22	5	13	31	7	11	5	487	13.5278	0
AATCCTTGGAACCTAGGTGTGAGTGC_ssc-miR-362	21	48	33	26	45	41	27	45	21	21	69	116	6	17	20	21	5	16	9	63	11	39	21	31	35	22	13	25	20	33	18	40	63	17	30	24	1112	30.8889	1
AATGACACGATCACTCCCGTTG_ssc-miR-425-5p	21	23	22	15	28	29	31	23	9	12	42	84	15	17	27	16	21	35	6	32	11	19	14	19	31	15	6	18	19	31	11	20	74	15	13	17	841	23.3611	1
AATGACACGATCACTCCCGTTGA_ssc-miR-425-5p	26	30	36	7	32	50	17	28	14	16	35	94	10	18	13	13	8	36	7	52	6	28	13	23	15	8	8	6	14	23	8	24	90	13	15	13	849	23.5833	1
AATGACACGATCACTCCCGTTGAG_ssc-miR-425-5p	37	105	81	48	118	94	57	76	54	54	124	268	17	76	100	51	26	86	25	97	28	69	58	58	83	46	33	43	53	80	29	92	121	20	82	48	2537	70.4722	1
AATGACACGATCACTCCCGTTGAGA_ssc-miR-425-5p	1	11	13	11	22	23	9	10	22	6	18	57	6	10	7	9	7	13	6	12	4	9	6	14	9	7	7	12	14	15	7	12	33	11	8	5	446	12.3889	0
AATGACACGATCACTCCCGTTGAGC_ssc-miR-425-5p	7	47	17	60	30	72	74	93	30	24	54	87	25	42	33	25	47	29	11	27	32	16	47	58	43	21	9	62	44	73	45	50	97	48	29	40	1548	43	1
AATGACACGATCACTCCCGTTGAGT_ssc-miR-425-5p	91	362	159	159	245	346	239	276	176	122	301	735	84	238	244	154	123	151	73	235	106	153	225	227	215	104	89	208	194	293	140	208	345	127	176	154	7477	207.694	1
AATGCCCCTAAAAATCCTTAT_ssc-miR-365-3p	4	13	7	1	8	21	3	11	5	5	8	17	1	3	1	1	5	4	0	12	1	10	7	11	1	1	1	4	5	7	5	7	22	6	5	7	230	6.38889	0
AATGGATTTTTGGAG_bta-miR-1246	46	49	8	18	42	36	28	42	28	40	55	14	29	48	62	25	32	20	58	15	33	12	22	15	70	50	24	34	18	26	21	49	10	16	49	9	1153	32.0278	1
AATGGATTTTTGGAGC_bta-miR-1246	51	45	24	17	75	42	31	62	46	85	82	21	31	67	61	25	34	9	80	18	42	21	68	18	77	59	33	44	24	59	15	52	12	18	69	25	1542	42.8333	1
AATGGATTTTTGGAGCC_bta-miR-1246	4	3	3	8	13	15	10	28	11	23	16	2	18	28	8	1	30	5	18	1	30	1	23	10	15	10	2	22	13	17	11	12	8	19	7	4	449	12.4722	0
AATGGATTTTTGGAGCT_bta-miR-1246	85	28	16	26	60	61	44	81	27	114	63	18	45	98	36	15	93	10	81	27	80	11	81	22	52	35	22	41	69	55	42	60	30	53	40	16	1737	48.25	1
AATGGATTTTTGGAGT_bta-miR-1246	4	6	7	9	11	22	20	22	14	8	9	4	11	32	6	4	23	2	7	3	20	0	47	10	13	4	4	22	11	16	7	14	6	17	11	7	433	12.0278	0
AATGGCGCCACTAGGGTTGTG_bta-miR-652	32	52	30	17	51	29	27	44	37	19	97	83	11	27	70	34	31	24	1	42	4	15	17	42	48	18	32	22	22	33	13	70	87	20	41	15	1257	34.9167	1
AATGGCGCCACTAGGGTTGTGT_bta-miR-652	6	17	12	9	13	29	26	23	10	5	33	43	6	9	11	10	10	6	2	20	2	8	16	28	16	5	6	4	13	16	14	13	66	12	17	12	548	15.2222	0
AATTGCACGGTATCCATCTGTA_ssc-miR-363	8	24	32	13	71	38	21	26	26	19	93	32	13	21	28	29	22	19	9	69	11	61	47	18	57	11	13	22	28	49	10	70	28	38	44	10	1130	31.3889	1
AATTGCACTTTAGCAATGGTG_bta-miR-367	23	46	42	11	50	45	14	33	17	15	19	155	12	21	50	39	13	82	14	97	10	23	11	64	37	26	14	20	37	48	13	45	48	20	46	13	1273	35.3611	1
ACACTGTCTGGTAACGATGTT_bta-miR-200a	4	14	7	11	13	19	11	5	10	4	11	28	3	7	9	15	8	6	3	13	1	7	6	6	7	9	0	4	7	9	7	21	27	3	5	3	323	8.97222	0
ACAGATTCGATTCTAGGGGAAT_hsa-miR-10b-3p	6	23	8	14	28	33	16	22	18	12	28	31	7	12	39	19	7	15	7	11	10	19	16	22	15	5	5	17	4	27	9	32	23	15	16	12	603	16.75	0
ACAGTACTGTGATAACTGA_ssc-miR-101	6	35	5	15	16	12	25	6	14	21	26	56	4	10	19	31	6	20	2	19	6	12	16	19	31	22	9	9	9	16	7	24	24	6	30	9	597	16.5833	0
ACAGTACTGTGATAACTGAA_ssc-miR-101	6	29	11	16	31	14	37	19	8	25	51	65	4	8	29	38	12	55	8	40	4	9	15	29	36	25	9	25	15	24	7	43	31	18	38	28	862	23.9444	1
ACAGTACTGTGATAACTGAAA_ssc-miR-101	7	21	12	13	15	24	26	13	8	13	29	34	2	10	17	15	14	21	7	24	1	9	14	17	23	17	5	9	12	24	8	23	24	5	6	9	531	14.75	0
ACAGTACTGTGATAACTGAAG_ssc-miR-101	17	80	27	59	97	71	79	60	37	57	92	148	18	40	95	98	46	99	22	73	23	48	46	77	85	82	32	52	37	77	16	108	73	30	81	39	2221	61.6944	1
ACATAGCGAGACCCCGTCTCT_ssc-mir-1285	18	16	26	18	29	36	17	11	18	4	23	4	10	23	5	6	2	34	5	20	32	17	32	5	13	1	13	9	12	25	13	14	45	17	8	13	594	16.5	0
ACATAGCGAGACCCCGTCTCTT_ssc-mir-1285	46	20	22	25	77	82	41	35	40	4	62	15	9	40	37	14	28	68	28	32	46	31	56	8	16	6	19	34	23	66	28	50	79	24	10	25	1246	34.6111	1
ACATGCCTTGAGTGTAGGACCGT_ssc-miR-532-5p	11	22	19	33	22	20	33	31	12	12	40	31	11	10	16	19	19	25	9	21	22	10	23	15	28	16	8	27	11	39	14	37	41	11	41	21	780	21.6667	1
ACATTCAACGCTGTCGGTGAGT_ssc-miR-181a	3	113	12	11	21	5	43	15	5	16	28	39	10	16	13	5	19	6	1	26	3	6	6	13	29	12	2	7	10	19	15	11	75	28	15	34	692	19.2222	0
ACCACAGGGTAGAACC_ssc-miR-140-3p	5	7	2	20	22	9	37	11	9	31	31	4	4	22	39	28	13	32	10	8	14	5	15	13	24	25	8	34	16	20	13	32	6	2	50	15	636	17.6667	0
ACCACAGGGTAGAACCACGG_ssc-miR-140-3p	18	106	38	36	78	45	76	22	25	58	71	93	19	45	58	31	42	80	9	83	28	35	39	43	58	86	20	29	45	114	38	39	64	26	70	33	1800	50	1
ACCACAGGGTAGAACCACGGA_ssc-miR-140-3p	32	141	50	46	117	101	108	45	38	47	77	168	41	66	69	74	46	131	32	105	15	51	57	68	82	61	28	35	48	118	44	61	121	52	76	49	2500	69.4444	1
ACCACAGGGTAGAACCACGGAC_ssc-miR-140-3p	76	227	108	110	257	226	174	181	116	123	240	391	88	142	202	196	110	239	72	176	82	156	150	211	162	136	72	127	104	222	94	189	185	90	223	143	5800	161.111	1
ACCACAGGGTAGAACCACGGACA_ssc-miR-140-3p	45	157	77	26	89	77	41	83	25	30	102	257	20	57	62	51	33	64	45	93	16	67	46	58	43	29	23	41	40	78	41	44	116	38	49	35	2198	61.0556	1
ACCACAGGGTAGAACCACGGACG_ssc-miR-140-3p	2	33	16	11	24	20	14	30	14	10	32	31	8	39	27	19	23	26	21	23	11	13	17	18	18	20	13	16	17	24	17	27	20	12	32	9	707	19.6389	0
ACCACAGGGTAGAACCACGGAT_ssc-miR-140-3p	2	17	11	20	9	53	34	39	12	4	24	29	19	31	6	8	28	6	7	5	10	17	34	48	20	2	3	30	22	31	33	23	27	15	10	24	713	19.8056	0
ACCCGTAGAACCGACCTTGC_ssc-miR-99b	8	44	12	26	18	16	47	14	27	27	53	29	15	19	18	19	37	12	15	21	16	11	12	19	49	33	9	15	11	20	10	15	57	19	29	12	814	22.6111	1
ACCCGTAGAACCGACCTTGCA_ssc-miR-99b	6	22	12	31	5	6	50	18	15	14	32	12	14	18	10	8	30	7	9	6	13	7	7	7	33	12	2	19	10	15	13	13	35	8	13	12	544	15.1111	0
ACCCGTAGAACCGACCTTGCG_ssc-miR-99b	63	176	107	191	120	95	411	122	117	232	353	207	69	164	171	130	228	117	179	132	84	58	82	86	392	272	105	141	131	158	80	160	180	80	276	83	5752	159.778	1
ACCCGTAGATCCGATCTTG_ssc-miR-99a	2	48	11	17	17	7	125	24	17	36	43	59	20	35	12	16	41	17	4	35	8	12	10	14	112	39	7	20	16	23	13	27	67	17	19	33	1023	28.4167	1
ACCCGTAGATCCGATCTTGC_ssc-miR-99a	5	62	20	117	21	32	630	52	61	42	91	53	106	86	24	25	137	36	6	47	32	16	39	32	231	67	10	40	68	105	116	37	190	81	31	110	2858	79.3889	1
ACCCGTAGATCCGATCTTGG_ssc-miR-99a	1	14	2	4	1	4	31	3	20	1	8	10	7	39	0	2	57	4	0	5	12	2	2	0	25	4	0	1	1	6	6	1	12	7	4	11	307	8.52778	0
ACCCGTAGATCCGATCTTGT_ssc-miR-99a	21	496	89	301	168	113	2158	240	219	236	605	443	249	272	191	135	504	228	25	272	75	79	165	147	1255	513	72	154	250	378	442	256	644	239	186	450	12270	340.833	1
ACCCGTAGATCCGATCTTGTG_ssc-miR-99a	14	189	33	69	48	34	298	79	73	84	193	209	48	58	40	24	68	50	8	138	24	39	26	31	325	118	21	41	66	81	55	79	205	50	33	62	3013	83.6944	1
ACCCGTAGATCCGATCTTGTGA_ssc-miR-99a	10	420	65	104	79	52	686	114	104	111	277	443	71	100	96	88	148	56	8	186	32	53	40	38	641	238	41	66	117	155	103	122	362	101	55	105	5487	152.417	1
ACCCGTAGATCCGATCTTGTGT_ssc-miR-99a	0	62	7	14	10	14	82	20	6	12	36	28	11	23	7	1	24	5	0	19	4	5	8	16	80	17	5	6	14	15	13	5	59	15	7	28	678	18.8333	0
ACCCTGTAGAACCGAATT_ssc-miR-10b	2	23	10	24	25	21	23	15	17	24	29	14	8	13	45	28	23	15	11	7	9	1	11	18	16	17	3	23	23	26	17	40	11	11	19	15	637	17.6944	0
ACCCTGTAGAACCGAATTTG_ssc-miR-10b	37	142	72	110	181	113	149	91	68	137	164	207	32	131	288	199	124	124	76	105	71	76	99	96	128	138	52	80	88	143	56	243	129	70	203	72	4294	119.278	1
ACCCTGTAGAACCGAATTTGA_ssc-miR-10b	2	16	5	19	10	22	19	19	9	3	9	13	3	9	15	2	16	5	1	6	8	9	10	18	4	2	2	7	15	25	7	4	26	11	4	10	365	10.1389	0
ACCCTGTAGAACCGAATTTGC_ssc-miR-10b	28	75	50	154	77	155	150	111	66	64	96	89	54	121	128	90	142	72	37	50	56	41	132	102	82	56	25	95	112	192	85	195	146	79	90	71	3368	93.5556	1
ACCCTGTAGAACCGAATTTGT_ssc-miR-10b	105	381	242	421	469	588	588	479	280	339	501	582	185	414	772	541	420	425	182	350	179	257	508	440	381	294	135	311	408	616	321	798	697	307	440	322	14678	407.722	1
ACCCTGTAGAACCGAATTTGTA_ssc-miR-10b	23	81	47	113	57	153	137	105	50	67	95	135	46	108	110	84	107	32	38	38	61	40	110	110	47	51	22	92	89	122	61	144	146	73	70	49	2913	80.9167	1
ACCCTGTAGAACCGAATTTGTG_ssc-miR-10b	416	1589	908	1142	2193	1566	1428	1144	871	1627	2039	2499	507	1551	3672	2813	1375	1538	927	1171	705	1018	1338	1207	1477	1343	599	936	1083	1744	754	2822	1228	640	2384	673	50927	1414.64	1
ACCCTGTAGAACCGAATTTGTGA_bta-miR-10b	36	96	41	69	81	82	76	65	41	49	99	115	17	63	168	86	49	85	59	73	25	48	50	76	58	44	24	50	61	76	38	132	77	45	83	37	2374	65.9444	1
ACCCTGTAGAACCGAATTTGTGC_bta-miR-10b	17	35	30	117	44	109	133	77	42	40	61	46	44	95	73	68	78	45	16	35	52	26	103	83	45	27	17	61	91	95	66	108	81	43	81	57	2241	62.25	1
ACCCTGTAGAACCGAATTTGTGT_bta-miR-10b	57	284	158	305	395	458	374	298	203	216	322	313	148	362	495	355	280	230	113	170	172	173	389	328	213	163	87	202	262	412	264	415	297	166	338	199	9616	267.111	1
ACCCTGTAGAACCGAATTTGTGTG_ssc-mir-10b	5	18	12	7	26	17	23	18	10	18	17	20	5	15	18	12	14	10	10	13	16	10	6	6	12	10	6	6	11	20	16	29	8	8	32	6	490	13.6111	0
ACCCTGTAGAACCGAATTTGTT_ssc-miR-10b	0	10	7	38	5	32	27	23	10	5	13	2	8	16	2	2	23	3	5	0	7	4	35	21	6	1	1	19	17	17	20	20	32	18	3	13	465	12.9167	0
ACCCTGTAGATCCGAAT_ssc-miR-10a-5p	0	3	17	30	3	6	23	2	3	12	17	13	9	6	2	7	13	38	3	7	7	1	6	6	17	12	0	1	16	16	13	5	30	7	18	29	398	11.0556	0
ACCCTGTAGATCCGAATC_ssc-miR-10a-5p	0	3	6	16	1	8	43	12	5	2	19	4	5	9	2	0	28	5	0	1	7	1	1	1	11	7	2	8	7	6	13	3	27	10	3	15	291	8.08333	0
ACCCTGTAGATCCGAATT_ssc-miR-10a-5p	5	60	21	65	20	24	185	23	10	54	115	43	28	45	26	10	92	67	6	25	28	15	12	25	94	59	1	18	43	69	55	28	115	31	71	98	1686	46.8333	1
ACCCTGTAGATCCGAATTT_ssc-miR-10a-5p	3	50	31	65	31	28	177	18	15	22	76	36	11	38	16	14	75	67	7	44	11	8	19	20	95	39	1	14	31	44	40	20	112	39	33	72	1422	39.5	1
ACCCTGTAGATCCGAATTTG_ssc-miR-10a-5p	21	561	86	124	129	69	494	74	79	158	362	298	65	141	68	62	253	108	21	185	53	62	52	90	404	284	40	43	107	151	97	134	451	113	128	173	5740	159.444	1
ACCCTGTAGATCCGAATTTGA_ssc-miR-10a-5p	2	71	6	29	10	30	145	29	13	8	22	31	31	23	7	3	51	9	6	17	13	5	12	14	39	15	2	12	22	39	35	12	150	54	10	26	1003	27.8611	1
ACCCTGTAGATCCGAATTTGC_ssc-miR-10a-5p	17	367	74	420	97	125	1576	177	150	150	540	183	225	265	86	64	628	140	32	165	108	55	150	146	579	268	42	150	245	360	306	190	932	272	145	428	9857	273.806	1
ACCCTGTAGATCCGAATTTGG_ssc-miR-10a-5p	0	60	6	29	2	12	103	10	34	8	28	15	5	110	4	2	268	6	1	9	45	2	7	7	52	14	2	7	15	17	14	7	60	18	11	39	1029	28.5833	1
ACCCTGTAGATCCGAATTTGT_ssc-miR-10a-5p	87	2710	420	1186	660	519	5469	600	617	951	2358	1194	671	1033	530	353	1949	731	155	937	360	310	508	606	2816	1603	213	426	940	1439	924	720	3434	1147	725	1545	40846	1134.61	1
ACCCTGTAGATCCGAATTTGTA_ssc-miR-10a-5p	5	167	17	50	28	28	227	44	29	27	109	94	35	65	16	17	116	17	5	38	17	19	33	29	91	47	4	15	48	66	37	24	271	59	19	87	2000	55.5556	1
ACCCTGTAGATCCGAATTTGTG_ssc-miR-10a-5p	76	3081	332	481	805	348	2588	342	423	830	2167	1441	453	812	619	538	1180	493	122	748	270	383	354	393	2136	1437	208	232	521	786	440	704	1765	625	618	988	29739	826.083	1
ACCCTGTAGATCCGAATTTGTGA_bta-miR-10a	24	604	84	129	129	82	461	101	76	118	324	293	73	118	67	49	168	90	22	193	48	53	29	66	362	193	29	35	116	151	78	86	563	138	94	153	5399	149.972	1
ACCCTGTAGATCCGAATTTGTGC_bta-miR-10a	2	113	12	63	25	28	305	35	23	41	110	47	63	78	17	12	153	20	5	32	24	7	32	31	104	67	5	27	62	70	63	47	211	76	28	95	2133	59.25	1
ACCCTGTAGATCCGAATTTGTGG_bta-miR-10a	0	35	5	6	3	0	9	2	19	5	16	3	7	37	2	0	88	0	1	6	16	1	3	4	21	3	1	3	6	7	4	1	33	10	0	16	373	10.3611	0
ACCCTGTAGATCCGAATTTGTGT_bta-miR-10a	19	1032	100	190	181	136	1142	112	153	194	486	281	152	301	99	57	452	121	29	176	120	87	138	158	578	374	39	78	204	333	213	160	777	294	156	396	9518	264.389	1
ACCCTGTAGATCCGAATTTGTT_ssc-miR-10a-5p	0	31	3	19	1	5	44	5	4	5	14	5	11	8	0	0	32	3	0	4	6	2	15	7	13	5	2	7	9	10	15	5	49	16	2	22	379	10.5278	0
ACCTTCTTGTATAAGCACTGTGC_bta-miR-1248	11	17	12	8	27	16	18	30	14	27	35	10	11	27	20	14	15	11	14	18	24	12	18	31	32	33	11	17	13	21	5	18	10	3	25	11	639	17.75	0
ACCTTCTTGTATAAGCACTGTGCT_bta-miR-1248	33	27	45	46	48	51	39	72	40	35	53	19	25	53	33	24	25	25	37	46	47	20	35	56	54	27	18	60	55	61	45	57	70	34	25	47	1487	41.3056	1
ACGCCCTTCCCCCCCTTCTTC_ssc-miR-1249	7	54	15	9	20	26	37	14	14	14	38	34	5	32	27	15	12	9	7	24	12	9	16	13	21	13	8	8	27	26	18	37	29	3	15	10	678	18.8333	0
ACGCCCTTCCCCCCCTTCTTCA_ssc-miR-1249	56	136	19	15	45	36	42	55	22	23	77	137	10	31	58	52	17	21	23	46	23	38	27	26	42	25	26	23	75	40	29	69	99	24	15	9	1511	41.9722	1
ACGCTTATCAGACTGATGTTGAC_hsa-mir-21	0	0	1	21	0	3	3	1	1	26	1	5	9	0	0	38	16	24	8	1	1	1	12	0	19	24	4	15	11	1	7	36	3	9	19	11	331	9.19444	0
ACGGAATCCCAAAAGCAGCTG_ssc-miR-191	49	46	46	59	75	64	87	69	58	70	94	85	23	77	90	55	55	72	50	60	46	54	51	44	68	65	23	47	46	62	47	69	57	35	86	32	2116	58.7778	1
ACGTTGGCTCTGGTGGTGATG_ssc-miR-1306-3p	9	23	10	12	20	9	17	13	11	18	26	29	7	19	16	8	9	8	20	11	5	3	6	14	21	21	10	7	6	8	2	12	16	3	19	7	455	12.6389	0
ACGTTGGCTCTGGTGGTGATGT_ssc-miR-1306-3p	6	19	14	19	18	19	28	21	7	20	33	24	5	16	19	7	13	16	13	8	10	11	15	25	21	13	2	14	14	17	13	23	16	9	18	11	557	15.4722	0
ACTACAGAACTTTGT_ssc-miR-148a-3p	0	9	2	23	10	16	31	8	7	14	16	10	10	10	35	17	16	16	11	5	10	2	11	6	28	24	2	10	16	16	9	30	5	3	35	14	487	13.5278	0
ACTAGACTGAAGCTCCTTGAG_bta-miR-151-3p	10	19	8	13	13	4	18	6	9	12	18	23	9	13	11	19	25	20	4	13	13	8	5	10	23	18	6	10	7	12	1	13	12	1	14	10	430	11.9444	0
ACTAGACTGAAGCTCCTTGAGG_ssc-miR-151-3p	52	77	62	67	97	75	78	71	63	70	105	147	35	71	84	76	55	76	57	61	42	52	37	56	83	65	48	52	40	63	30	93	61	30	110	37	2378	66.0556	1
ACTAGATTGTGAGCTCCTGG_ssc-miR-28-3p	15	36	17	18	20	16	29	33	25	25	31	41	10	29	42	18	17	40	17	21	10	15	13	19	32	16	10	24	20	18	15	26	26	10	28	15	797	22.1389	1
ACTAGATTGTGAGCTCCTGGA_ssc-miR-28-3p	48	104	34	40	74	70	71	85	28	48	81	165	25	60	121	62	36	86	66	52	19	45	39	63	55	51	41	42	44	58	34	78	68	32	73	55	2153	59.8056	1
ACTAGATTGTGAGCTCCTGGAA_ssc-miR-28-3p	12	32	5	12	18	19	14	24	13	15	23	38	12	8	29	11	8	22	16	12	5	5	8	8	16	4	3	11	11	7	7	18	29	8	12	4	499	13.8611	0
ACTAGATTGTGAGCTCCTGGAG_ssc-miR-28-3p	44	55	36	42	50	55	62	53	47	46	75	119	18	45	70	49	41	48	31	46	42	26	17	25	46	30	28	37	17	41	23	48	47	12	61	26	1558	43.2778	1
ACTCAAACTGTGGGG_ssc-miR-371-5p	377	310	444	735	989	615	849	706	560	1004	1204	364	424	1043	1122	780	568	954	706	460	662	332	725	657	1075	796	605	909	593	1018	547	1434	414	208	1162	481	25832	717.556	1
ACTCAAACTGTGGGGA_ssc-miR-371-5p	12	12	26	24	19	45	35	53	23	17	33	18	18	38	19	19	35	20	14	19	28	14	19	35	30	5	12	39	37	80	22	50	42	16	19	11	958	26.6111	1
ACTCAAACTGTGGGGC_ssc-miR-371-5p	12	4	15	11	13	9	10	16	8	36	25	3	7	9	15	19	6	20	12	16	9	7	11	16	18	19	12	8	14	36	12	21	12	7	14	8	490	13.6111	0
ACTCAAACTGTGGGGG_ssc-miR-371-5p	177	222	335	280	494	377	333	400	286	582	553	211	160	458	410	279	230	361	205	419	279	197	293	339	511	326	258	288	407	823	248	564	313	131	316	211	12276	341	1
ACTCAAACTGTGGGGGA_ssc-miR-371-5p	15	30	37	78	42	138	117	140	62	27	74	27	75	121	35	30	87	28	14	16	67	27	131	83	43	15	19	92	91	113	114	84	122	53	33	64	2344	65.1111	1
ACTCAAACTGTGGGGGC_ssc-miR-371-5p	775	775	1264	1451	2740	2047	1811	2158	1456	2209	2888	872	1048	2303	2438	2351	1278	2017	1049	1290	1440	992	2294	1462	2338	1551	1480	1634	1860	2327	1388	2990	1269	615	2748	1179	61787	1716.31	1
ACTCAAACTGTGGGGGCA_ssc-miR-371-5p	286	498	692	465	1523	1176	535	848	485	657	1422	504	346	864	732	814	357	683	218	669	406	602	862	618	676	438	614	541	723	994	494	1237	680	320	781	401	24161	671.139	1
ACTCAAACTGTGGGGGCAA_ssc-miR-371-5p	10	56	40	25	43	54	31	49	13	10	36	50	9	37	11	7	17	20	13	9	19	43	29	37	14	4	11	25	47	51	20	28	43	37	11	30	989	27.4722	1
ACTCAAACTGTGGGGGCAC_ssc-miR-371-5p	462	1543	1069	604	1403	896	765	1230	515	1147	1168	1187	355	1180	734	560	676	1356	636	717	481	852	784	1006	1113	656	334	777	1191	1579	660	1261	816	491	809	716	31729	881.361	1
ACTCAAACTGTGGGGGCACA_ssc-miR-371-5p	68	318	192	150	192	346	178	520	151	91	201	295	105	390	82	50	208	159	79	94	117	148	267	329	132	37	44	214	298	370	268	236	369	250	83	224	7255	201.528	1
ACTCAAACTGTGGGGGCACAAA_hsa-miR-371a-5p	8	17	14	4	18	13	12	21	8	13	16	28	4	15	7	5	5	15	9	14	4	11	12	9	7	3	3	8	7	14	4	13	13	7	13	8	382	10.6111	0
ACTCAAACTGTGGGGGCACATT_hsa-miR-371a-5p	12	26	9	16	21	25	14	29	17	12	30	24	8	7	8	11	12	17	10	15	4	11	17	21	9	6	7	25	13	19	10	9	20	7	19	10	530	14.7222	0
ACTCAAACTGTGGGGGCACC_ssc-miR-371-5p	203	650	548	740	734	1170	782	1739	506	499	785	566	508	1396	296	327	878	524	261	272	490	482	1281	1157	578	212	194	972	1266	1558	1048	997	991	817	392	891	26710	741.944	1
ACTCAAACTGTGGGGGCACCA_hsa-miR-371a-5p	4	16	9	4	15	16	4	44	4	1	12	15	0	9	3	3	7	8	1	6	5	14	10	13	3	1	0	7	10	6	7	13	23	15	2	9	319	8.86111	0
ACTCAAACTGTGGGGGCACCC_hsa-miR-371a-5p	3	11	3	19	13	18	16	28	7	1	5	9	4	17	2	7	12	5	3	2	5	2	16	19	7	1	1	25	19	23	14	7	15	24	2	15	380	10.5556	0
ACTCAAACTGTGGGGGCACCT_hsa-miR-371a-5p	12	50	49	44	51	121	39	132	35	20	41	40	23	94	24	13	52	22	22	23	29	33	70	64	30	7	14	52	73	115	79	57	93	67	21	56	1767	49.0833	1
ACTCAAACTGTGGGGGCACCTC_hsa-miR-371a-5p	11	18	12	37	21	44	38	52	20	14	43	38	16	34	15	7	17	7	12	10	21	13	26	22	19	6	9	19	11	43	13	39	63	17	13	22	822	22.8333	1
ACTCAAACTGTGGGGGCACCTT_hsa-miR-371a-5p	105	231	137	136	213	290	151	232	174	93	265	415	70	168	206	159	97	128	89	142	104	121	153	183	103	79	68	108	93	173	120	217	267	93	121	111	5615	155.972	1
ACTCAAACTGTGGGGGCACCTTA_hsa-miR-371a-5p	19	34	24	8	18	28	10	26	11	6	14	72	7	9	19	19	8	16	7	22	6	9	11	22	4	4	16	9	7	21	13	23	33	8	8	10	581	16.1389	0
ACTCAAACTGTGGGGGCACCTTC_hsa-miR-371a-5p	97	131	79	58	119	115	56	84	59	69	109	224	21	70	134	70	42	93	65	81	40	75	42	57	56	54	60	56	36	59	33	149	113	23	65	32	2726	75.7222	1
ACTCAAACTGTGGGGGCACG_ssc-miR-371-5p	19	141	83	58	88	156	72	143	322	33	64	57	31	722	26	22	479	56	26	26	266	87	111	94	83	15	17	94	112	122	95	94	98	70	41	129	4152	115.333	1
ACTCAAACTGTGGGGGCACGT_hsa-miR-371a-5p	11	42	22	13	46	103	40	138	26	9	34	28	30	54	4	13	42	11	3	26	20	29	110	57	13	2	10	32	59	90	56	45	99	68	18	60	1463	40.6389	1
ACTCAAACTGTGGGGGCACGTT_hsa-miR-371a-5p	7	8	8	5	19	30	17	28	15	9	31	35	7	15	15	15	9	8	3	10	7	9	17	20	11	2	8	10	17	16	18	14	28	8	7	3	489	13.5833	0
ACTCAAACTGTGGGGGCACGTTC_hsa-miR-371a-5p	17	24	9	21	23	30	19	25	18	13	20	49	4	20	21	15	10	17	13	18	10	15	8	18	7	5	9	19	10	10	12	36	38	4	16	6	609	16.9167	0
ACTCAAACTGTGGGGGCACT_ssc-miR-371-5p	1279	4937	3865	2100	5731	4909	2680	6400	2065	2666	4052	4743	1591	5465	2261	2065	2679	3350	1441	2161	1690	3523	4427	4926	3129	1298	1171	3106	4906	6333	3490	4850	4072	2970	2433	3322	122086	3391.28	1
ACTCAAACTGTGGGGGCACTA_ssc-miR-371-5p	144	578	325	439	269	824	426	1280	321	149	315	580	210	781	138	111	446	227	165	102	289	266	590	730	246	64	72	581	655	733	470	402	1100	578	116	449	15171	421.417	1
ACTCAAACTGTGGGGGCACTAA_hsa-miR-371a-5p	86	221	126	38	116	58	30	143	62	38	91	210	18	119	29	21	27	81	59	55	28	87	35	80	63	13	20	46	71	95	40	78	87	51	44	53	2519	69.9722	1
ACTCAAACTGTGGGGGCACTAAA_hsa-miR-371a-5p	55	115	58	15	74	47	36	92	28	46	40	105	13	84	26	19	28	59	45	33	9	58	21	51	50	15	18	17	62	62	37	60	50	43	27	22	1620	45	1
ACTCAAACTGTGGGGGCACTAAAA_hsa-miR-371a-5p	14	31	18	2	14	4	9	23	5	10	11	32	3	14	4	4	5	19	14	18	6	17	5	12	9	7	3	10	11	15	10	6	14	8	9	6	402	11.1667	0
ACTCAAACTGTGGGGGCACTAAC_hsa-miR-371a-5p	9	14	11	8	11	5	15	26	9	13	6	10	6	15	7	7	7	24	19	3	5	7	7	15	6	7	5	19	22	19	15	17	10	13	10	8	410	11.3889	0
ACTCAAACTGTGGGGGCACTAAG_hsa-miR-371a-5p	28	51	40	19	49	18	20	53	27	27	32	47	7	59	13	13	18	39	54	16	23	35	21	37	19	12	11	43	45	33	29	64	14	8	31	18	1073	29.8056	1
ACTCAAACTGTGGGGGCACTAAT_hsa-miR-371a-5p	6	15	17	14	22	13	10	34	12	8	8	14	8	27	2	5	8	11	20	5	7	30	15	15	5	8	6	12	27	19	13	11	20	16	7	5	475	13.1944	0
ACTCAAACTGTGGGGGCACTAC_hsa-miR-371a-5p	19	36	27	27	40	40	29	52	20	37	26	30	19	73	23	14	27	40	39	13	12	30	30	35	42	16	8	41	34	52	45	38	27	19	42	23	1125	31.25	1
ACTCAAACTGTGGGGGCACTAG_hsa-miR-371a-5p	21	68	60	17	53	34	17	63	17	29	45	42	17	90	21	22	25	56	52	19	30	54	43	54	34	28	6	38	38	41	42	47	30	17	47	36	1353	37.5833	1
ACTCAAACTGTGGGGGCACTAGA_hsa-miR-371a-5p	18	54	28	10	26	29	12	31	13	8	17	39	2	22	8	6	5	20	11	14	9	27	10	15	17	7	7	7	18	20	17	31	17	20	10	11	616	17.1111	0
ACTCAAACTGTGGGGGCACTAT_hsa-miR-371a-5p	14	55	29	36	49	58	45	45	27	35	47	37	18	48	21	14	24	28	19	19	19	43	49	64	30	9	10	32	36	55	38	44	57	30	26	48	1258	34.9444	1
ACTCAAACTGTGGGGGCACTC_ssc-miR-371-5p	786	2317	1580	3307	1830	4520	3386	7402	2270	1261	2523	2124	1571	5070	1029	963	3715	1582	1399	834	2222	1273	4319	4579	1785	523	531	4554	4556	5567	3826	4026	5061	3153	1145	3281	99870	2774.17	1
ACTCAAACTGTGGGGGCACTCC_hsa-miR-371a-5p	7	12	10	28	15	64	36	65	17	7	26	18	15	41	7	10	22	7	12	17	19	7	45	38	12	4	11	29	28	27	21	23	53	12	11	19	795	22.0833	1
ACTCAAACTGTGGGGGCACTCT_hsa-miR-371a-5p	43	121	77	110	95	299	141	198	142	45	152	203	62	141	79	87	66	66	44	67	77	61	137	111	59	44	42	93	103	174	122	130	172	83	70	92	3808	105.778	1
ACTCAAACTGTGGGGGCACTCTC_hsa-miR-371a-5p	39	57	40	29	57	54	49	48	52	32	78	102	11	32	54	63	20	38	30	45	20	40	30	31	35	38	22	42	19	32	23	55	59	8	68	20	1472	40.8889	1
ACTCAAACTGTGGGGGCACTG_ssc-miR-371-5p	52	344	153	131	155	281	148	412	626	91	152	184	90	1766	69	50	1131	119	89	79	738	134	223	285	204	43	46	214	215	315	229	194	302	207	83	293	9847	273.528	1
ACTCAAACTGTGGGGGCACTGC_hsa-miR-371a-5p	2	10	6	11	16	42	16	41	22	6	21	5	14	19	5	3	7	7	1	4	8	6	29	17	5	2	2	10	18	24	13	5	39	16	4	11	467	12.9722	0
ACTCAAACTGTGGGGGCACTGT_hsa-miR-371a-5p	57	120	92	89	163	400	113	298	128	37	180	182	62	158	44	67	59	57	19	112	86	87	249	163	49	24	38	75	105	200	124	121	388	107	38	87	4378	121.611	1
ACTCAAACTGTGGGGGCACTT_ssc-miR-371-5p	7682	22031	15458	10250	21153	19810	11998	28107	9813	10902	16654	24714	5131	20686	11055	9368	11913	13948	9349	9451	7691	15160	15738	19922	12285	5275	4994	15090	18227	22620	13021	23589	20668	12120	9211	11997	517081	14363.4	1
ACTCAAACTGTGGGGGCACTTA_ssc-miR-371-5p	971	4925	2214	1181	2757	2685	1368	4160	1321	969	1904	4961	663	2927	1051	933	1343	1649	829	1178	830	1972	1759	2348	1223	390	544	1593	2072	2875	1492	2571	2881	1736	942	1478	66695	1852.64	1
ACTCAAACTGTGGGGGCACTTAA_ssc-miR-371-5p	361	1260	750	180	607	442	194	921	262	285	459	1284	106	650	258	179	232	403	331	334	142	547	253	468	347	87	147	346	592	706	283	593	409	388	210	235	15251	423.639	1
ACTCAAACTGTGGGGGCACTTAAA_ssc-miR-371-5p	209	746	394	132	326	177	143	509	166	260	242	619	45	355	169	146	138	255	274	172	87	253	133	162	264	66	111	239	335	387	141	357	180	213	148	125	8678	241.056	1
ACTCAAACTGTGGGGGCACTTAAAA_ssc-miR-371-5p	33	55	46	13	33	12	10	62	18	40	25	86	11	45	21	17	18	44	43	27	13	34	30	30	46	11	14	23	44	41	22	57	19	22	22	12	1099	30.5278	1
ACTCAAACTGTGGGGGCACTTAAAG_ssc-miR-371-5p	12	21	29	9	19	12	13	22	12	27	16	16	1	35	11	5	9	10	24	8	9	14	13	11	26	16	4	17	21	21	11	18	2	8	12	14	528	14.6667	0
ACTCAAACTGTGGGGGCACTTAAAT_ssc-miR-371-5p	6	20	12	4	19	11	5	24	7	19	13	15	2	17	4	4	8	11	8	8	7	15	14	14	15	3	8	12	30	31	16	8	20	13	1	3	427	11.8611	0
ACTCAAACTGTGGGGGCACTTAAC_ssc-miR-371-5p	57	122	103	73	104	61	59	170	53	109	77	87	38	201	27	39	77	130	158	31	54	79	66	98	101	30	42	133	153	131	95	113	61	71	91	56	3150	87.5	1
ACTCAAACTGTGGGGGCACTTAAG_ssc-miR-371-5p	150	220	193	88	167	102	68	283	114	163	144	208	42	289	95	88	115	182	185	82	87	154	111	123	167	53	68	196	206	193	132	238	106	103	89	105	5109	141.917	1
ACTCAAACTGTGGGGGCACTTAAGA_ssc-miR-371-5p	6	17	18	7	9	6	9	20	9	6	9	32	1	13	2	1	2	9	9	6	2	14	7	9	9	3	3	10	6	13	9	13	13	4	1	6	313	8.69444	0
ACTCAAACTGTGGGGGCACTTAAT_ssc-miR-371-5p	68	147	135	74	149	121	54	226	69	68	84	140	50	227	39	31	83	95	87	53	51	119	99	154	99	29	35	116	181	196	137	122	113	115	59	78	3703	102.861	1
ACTCAAACTGTGGGGGCACTTAC_ssc-miR-371-5p	144	234	188	167	261	160	153	327	142	251	172	165	101	416	111	111	220	293	388	85	117	163	169	237	266	121	58	282	275	307	229	314	151	151	199	172	7300	202.778	1
ACTCAAACTGTGGGGGCACTTACA_ssc-miR-371-5p	9	31	28	7	24	9	9	32	8	14	22	37	6	24	8	10	11	19	13	11	9	13	8	14	13	4	2	19	22	13	12	16	10	10	12	12	521	14.4722	0
ACTCAAACTGTGGGGGCACTTAG_ssc-miR-371-5p	174	412	388	138	464	282	110	508	198	220	281	413	93	627	188	198	205	369	319	153	146	328	219	303	209	73	98	288	302	322	270	467	191	151	231	210	9548	265.222	1
ACTCAAACTGTGGGGGCACTTAGA_ssc-miR-371-5p	57	130	183	23	129	81	22	140	24	43	82	184	13	79	38	21	27	80	38	64	18	119	42	69	41	17	32	36	95	105	51	103	90	56	38	32	2402	66.7222	1
ACTCAAACTGTGGGGGCACTTAGT_ssc-miR-371-5p	11	47	28	19	54	38	7	45	10	22	25	15	12	57	15	7	18	23	28	12	8	35	35	33	17	7	11	43	42	36	37	34	20	34	21	19	925	25.6944	1
ACTCAAACTGTGGGGGCACTTAT_ssc-miR-371-5p	52	137	109	74	122	121	80	228	79	74	83	121	53	215	49	33	77	99	97	41	36	135	120	175	92	22	30	120	151	168	169	150	109	96	75	103	3695	102.639	1
ACTCAAACTGTGGGGGCACTTC_ssc-miR-371-5p	3515	7152	4381	17162	4566	22446	17694	22954	12508	3111	11626	8981	7307	15293	4515	4243	10783	4048	3758	3467	10734	3151	13054	13142	5067	2154	2431	13160	9386	16174	10757	10575	23784	6343	4615	9413	343450	9540.28	1
ACTCAAACTGTGGGGGCACTTCA_ssc-miR-371-5p	8	18	15	8	19	32	10	24	12	6	23	29	4	26	5	3	9	7	6	9	14	11	18	18	11	4	3	11	12	24	12	16	28	9	8	15	487	13.5278	0
ACTCAAACTGTGGGGGCACTTCC_ssc-miR-371-5p	46	78	49	66	54	100	60	104	52	37	88	92	17	74	50	36	30	47	22	34	46	39	67	47	34	29	31	57	44	76	49	80	96	22	46	25	1924	53.4444	1
ACTCAAACTGTGGGGGCACTTCG_ssc-miR-371-5p	5	19	10	12	12	14	17	18	101	6	16	16	16	86	8	7	59	5	13	4	50	6	16	14	14	5	8	19	8	18	9	17	14	3	20	18	683	18.9722	0
ACTCAAACTGTGGGGGCACTTCT_ssc-miR-371-5p	3	11	5	23	7	32	14	30	13	2	9	11	11	14	1	3	11	7	4	4	19	4	14	17	1	0	2	9	7	13	21	16	28	6	0	10	382	10.6111	0
ACTCAAACTGTGGGGGCACTTG_ssc-miR-371-5p	493	2118	997	847	1388	1345	779	1751	2530	809	1016	1254	455	4822	705	591	2538	1185	1156	446	2402	856	1132	1171	1013	383	340	1117	1082	1371	1103	1540	1151	667	891	986	44430	1234.17	1
ACTCAAACTGTGGGGGCACTTGA_ssc-miR-371-5p	121	278	239	51	213	129	37	259	55	89	102	243	29	194	77	51	69	130	131	90	52	197	104	114	63	24	37	118	140	116	140	183	112	96	65	76	4224	117.333	1
ACTCAAACTGTGGGGGCACTTGAA_ssc-miR-371-5p	6	23	17	4	9	5	6	12	6	4	8	26	1	14	10	7	8	10	5	7	4	16	7	14	5	5	2	6	14	14	5	14	11	6	6	9	326	9.05556	0
ACTCAAACTGTGGGGGCACTTGC_ssc-miR-371-5p	4	12	16	15	17	26	20	39	11	7	13	12	10	20	4	7	9	10	16	6	7	10	14	7	7	4	5	8	18	27	13	12	36	7	4	12	465	12.9167	0
ACTCAAACTGTGGGGGCACTTGT_ssc-miR-371-5p	15	11	7	9	18	25	12	36	5	7	15	14	11	31	6	13	12	8	21	4	3	9	19	18	17	6	6	11	13	14	20	18	20	16	10	12	492	13.6667	0
ACTCAAACTGTGGGGGCACTTT_ssc-miR-371-5p	42425	85710	50333	58475	70466	110405	67809	100049	60896	35967	94043	137074	27575	71808	64953	55729	40334	49111	32111	53219	43832	47587	53983	64775	41681	29427	29239	51053	41865	75602	41485	77953	112563	27155	51462	39632	2137786	59382.9	1
ACTCAAACTGTGGGGGCACTTTA_ssc-miR-371-5p	5918	10953	6734	3543	6449	9502	3962	9512	5023	2433	9211	19966	1877	5463	4490	4138	2439	3580	2248	6346	3028	5234	3739	4896	2655	1517	2747	3553	3561	6202	3295	5933	11791	2603	3260	2510	190311	5286.42	1
ACTCAAACTGTGGGGGCACTTTAA_ssc-miR-371-5p	1638	3953	1804	1105	1498	1823	1253	2241	1402	797	2361	7713	412	1486	1391	1120	604	965	748	1643	772	1183	637	919	873	538	842	946	884	1620	658	1389	2216	578	883	521	51416	1428.22	1
ACTCAAACTGTGGGGGCACTTTAAA_ssc-miR-371-5p	481	800	504	272	370	446	281	492	313	244	626	1644	94	336	329	244	141	256	227	441	183	313	156	220	226	175	211	233	241	378	153	411	531	133	261	142	12508	347.444	1
ACTCAAACTGTGGGGGCACTTTAAAA_ssc-miR-371-5p	82	122	33	39	36	56	28	71	42	41	63	212	21	33	44	31	23	41	25	57	34	39	17	17	42	25	27	31	35	46	17	50	49	18	45	5	1597	44.3611	1
ACTCAAACTGTGGGGGCACTTTAAAAA_ssc-miR-371-5p	41	25	16	18	8	15	15	31	13	14	27	72	2	15	30	14	8	22	17	15	10	16	1	12	15	6	5	10	15	13	10	11	11	2	12	5	572	15.8889	0
ACTCAAACTGTGGGGGCACTTTAAAC_ssc-miR-371-5p	22	8	20	23	15	23	20	26	8	17	24	34	8	21	10	9	22	13	19	14	9	10	13	11	16	12	7	22	19	30	14	11	23	4	8	6	571	15.8611	0
ACTCAAACTGTGGGGGCACTTTAAAG_ssc-miR-371-5p	26	29	29	34	24	13	10	28	24	25	44	74	7	31	25	28	11	24	32	18	18	19	14	17	14	20	17	28	19	20	18	25	23	7	41	10	846	23.5	1
ACTCAAACTGTGGGGGCACTTTAAAT_ssc-miR-371-5p	18	20	15	26	22	35	8	27	13	9	39	43	17	23	7	12	13	23	13	23	19	17	11	10	17	10	15	11	13	34	22	16	34	8	8	10	661	18.3611	0
ACTCAAACTGTGGGGGCACTTTAAC_ssc-miR-371-5p	126	97	97	143	109	146	108	150	122	114	201	210	55	198	68	53	111	104	121	76	86	105	77	90	117	74	75	110	121	163	105	90	176	51	117	47	4013	111.472	1
ACTCAAACTGTGGGGGCACTTTAAG_ssc-miR-371-5p	274	241	239	226	198	218	148	249	256	210	406	558	97	284	212	195	112	182	200	183	207	133	137	131	132	130	165	194	103	196	133	241	222	67	207	111	7197	199.917	1
ACTCAAACTGTGGGGGCACTTTAAGA_ssc-miR-371-5p	11	28	24	10	9	16	8	29	8	4	33	61	1	17	7	7	0	10	3	21	7	9	4	13	10	7	6	5	6	25	9	12	11	2	4	8	445	12.3611	0
ACTCAAACTGTGGGGGCACTTTAAT_ssc-miR-371-5p	174	324	223	244	280	381	217	361	215	168	343	588	133	302	161	132	173	130	157	170	187	205	201	177	159	101	131	221	221	375	183	202	357	132	159	120	8007	222.417	1
ACTCAAACTGTGGGGGCACTTTAC_ssc-miR-371-5p	162	128	141	228	145	268	178	285	173	127	250	304	112	284	112	102	85	140	200	107	168	134	125	170	129	119	103	161	134	212	169	140	257	70	199	105	5926	164.611	1
ACTCAAACTGTGGGGGCACTTTAG_ssc-miR-371-5p	905	991	884	702	920	986	532	1062	859	509	1401	1965	341	1146	695	621	366	657	641	702	738	694	474	598	460	399	507	619	437	710	556	833	913	246	817	404	26290	730.278	1
ACTCAAACTGTGGGGGCACTTTAGA_ssc-miR-371-5p	86	127	116	42	72	108	36	102	54	49	157	315	33	54	38	48	20	68	35	79	57	69	30	43	42	29	53	25	62	51	40	73	125	31	55	32	2456	68.2222	1
ACTCAAACTGTGGGGGCACTTTAGC_ssc-miR-371-5p	7	12	8	20	10	25	8	19	12	4	16	19	5	13	4	2	5	11	6	5	9	4	12	11	3	1	2	11	5	10	19	17	21	3	5	10	354	9.83333	0
ACTCAAACTGTGGGGGCACTTTAGT_ssc-miR-371-5p	34	59	43	64	54	80	40	60	46	32	85	129	28	68	21	34	12	34	29	57	49	46	42	51	35	21	20	41	35	60	50	52	62	25	38	40	1676	46.5556	1
ACTCAAACTGTGGGGGCACTTTAT_ssc-miR-371-5p	183	382	306	204	349	582	258	454	248	119	385	661	149	335	186	161	157	165	102	266	154	281	208	269	168	92	144	177	235	378	259	258	582	137	208	179	9381	260.583	1
ACTCAAACTGTGGGGGCACTTTATT_ssc-miR-371-5p	12	23	22	22	19	28	18	39	17	14	25	43	17	26	14	24	14	23	11	11	11	21	16	29	20	4	16	10	22	25	21	17	30	11	16	15	706	19.6111	0
ACTCAAACTGTGGGGGCACTTTC_ssc-miR-371-5p	21395	27797	18036	20898	25389	32772	18750	29627	18853	15282	35225	48983	7851	18732	29467	21758	11445	20249	15699	20168	15470	18275	13839	19185	15940	12894	12572	18172	11637	20204	11161	33160	35969	6864	21152	10811	735681	20435.6	1
ACTCAAACTGTGGGGGCACTTTCA_ssc-miR-371-5p	1544	4352	1403	854	1356	1897	865	1927	1157	665	2135	7476	373	1019	1304	1007	484	882	622	1414	676	1119	540	1057	725	458	721	832	639	1306	549	1296	2287	489	800	509	46739	1298.31	1
ACTCAAACTGTGGGGGCACTTTCAA_ssc-miR-371-5p	100	313	124	65	96	112	55	139	88	75	156	468	22	90	104	54	48	61	42	115	35	69	46	71	66	42	62	38	47	93	35	71	153	37	58	26	3276	91	1
ACTCAAACTGTGGGGGCACTTTCAAA_ssc-miR-371-5p	58	164	54	43	36	59	30	87	40	37	82	307	11	52	69	36	13	32	38	48	33	25	14	36	34	37	35	28	32	34	17	40	80	16	31	7	1795	49.8611	1
ACTCAAACTGTGGGGGCACTTTCAAAA_ssc-miR-371-5p	24	20	9	13	8	18	19	22	10	15	22	71	0	16	13	13	7	16	16	13	12	6	8	6	15	7	16	8	6	13	10	18	23	8	18	4	523	14.5278	0
ACTCAAACTGTGGGGGCACTTTCAAC_ssc-miR-371-5p	18	21	19	17	17	21	14	27	16	12	29	42	12	32	8	12	9	18	20	13	19	8	13	22	13	11	20	23	15	20	17	13	28	7	24	11	641	17.8056	0
ACTCAAACTGTGGGGGCACTTTCAAG_ssc-miR-371-5p	30	34	19	15	12	15	17	41	22	14	44	50	3	32	19	10	9	20	24	21	26	12	11	16	9	23	12	14	12	11	15	25	18	3	20	2	680	18.8889	0
ACTCAAACTGTGGGGGCACTTTCAAT_ssc-miR-371-5p	36	60	17	31	24	53	30	50	56	39	48	108	17	61	20	17	21	8	23	17	21	18	23	27	24	25	20	41	16	38	21	34	47	14	30	16	1151	31.9722	1
ACTCAAACTGTGGGGGCACTTTCAC_ssc-miR-371-5p	48	62	43	77	52	56	67	72	73	62	102	119	46	70	38	45	49	53	70	31	48	36	41	40	54	47	57	69	41	64	45	51	59	25	80	31	2023	56.1944	1
ACTCAAACTGTGGGGGCACTTTCAG_ssc-miR-371-5p	55	66	64	53	50	62	29	47	65	36	69	128	15	56	36	29	27	40	32	36	41	25	31	24	36	22	38	36	16	44	24	47	68	8	44	18	1517	42.1389	1
ACTCAAACTGTGGGGGCACTTTCAGA_ssc-miR-371-5p	3	17	17	8	13	8	3	20	7	3	26	64	3	11	8	5	3	8	10	19	8	8	7	3	10	4	7	9	8	10	4	12	24	4	9	4	387	10.75	0
ACTCAAACTGTGGGGGCACTTTCAT_ssc-miR-371-5p	40	86	24	60	42	50	50	78	57	37	66	123	31	87	44	44	31	25	34	28	38	43	36	33	25	17	29	54	28	55	39	46	85	23	48	32	1668	46.3333	1
ACTCAAACTGTGGGGGCACTTTCC_ssc-miR-371-5p	65	118	85	104	94	241	120	187	117	55	149	181	70	131	69	69	70	76	56	73	94	76	124	154	77	37	51	90	67	136	105	139	235	54	94	113	3776	104.889	1
ACTCAAACTGTGGGGGCACTTTCG_ssc-miR-371-5p	1002	902	731	910	862	846	624	854	896	600	1315	1616	336	1064	903	733	511	784	1028	609	864	584	399	552	582	514	524	671	377	628	465	1132	806	198	1182	355	26959	748.861	1
ACTCAAACTGTGGGGGCACTTTCGA_ssc-miR-371-5p	83	99	61	69	56	63	53	75	62	66	118	164	22	58	73	45	17	55	93	55	51	63	29	38	45	42	48	53	34	68	28	72	68	18	66	33	2143	59.5278	1
ACTCAAACTGTGGGGGCACTTTCGT_ssc-miR-371-5p	10	12	5	18	16	20	14	19	17	11	21	22	6	23	11	9	4	14	22	14	13	12	15	12	8	10	5	9	9	16	16	8	17	5	9	11	463	12.8611	0
ACTCAAACTGTGGGGGCACTTTCT_ssc-miR-371-5p	279	793	345	351	579	973	442	646	411	213	684	1098	210	558	449	393	238	325	219	376	341	436	383	567	251	156	199	307	307	505	329	598	871	205	383	309	15729	436.917	1
ACTCAAACTGTGGGGGCACTTTG_ssc-miR-371-5p	2766	5526	2669	5443	4585	4073	4771	4243	3807	3651	6050	8556	2711	6840	5594	5584	3374	4625	5285	2172	4477	2167	3640	2998	3422	3857	2666	4050	2155	3854	3402	5619	2892	1000	8885	2613	150022	4167.28	1
ACTCAAACTGTGGGGGCACTTTGA_ssc-miR-371-5p	736	1040	862	724	1095	1088	584	1065	674	586	1403	1996	375	802	669	642	278	853	452	778	474	630	562	599	518	426	572	660	536	843	579	999	880	271	789	385	26425	734.028	1
ACTCAAACTGTGGGGGCACTTTGAA_ssc-miR-371-5p	13	23	35	13	31	36	7	22	11	6	32	64	7	15	11	5	3	11	5	30	10	15	9	9	5	8	12	9	11	19	11	17	21	7	8	4	555	15.4167	0
ACTCAAACTGTGGGGGCACTTTGAAT_ssc-miR-371-5p	11	17	10	18	28	23	11	16	13	9	20	26	10	30	8	7	14	19	7	12	9	4	18	13	8	9	8	10	14	22	21	22	21	9	18	9	524	14.5556	0
ACTCAAACTGTGGGGGCACTTTGAT_ssc-miR-371-5p	8	12	10	15	12	22	5	23	2	7	21	25	4	20	6	4	3	7	4	8	5	6	7	9	3	3	9	10	7	13	14	6	25	7	8	14	364	10.1111	0
ACTCAAACTGTGGGGGCACTTTGC_ssc-miR-371-5p	10	16	14	20	15	57	12	35	16	6	24	21	8	24	5	7	8	15	6	10	12	16	21	29	15	6	7	19	16	22	35	15	26	7	19	19	613	17.0278	0
ACTCAAACTGTGGGGGCACTTTGG_ssc-miR-371-5p	13	39	24	18	16	31	18	31	69	6	25	37	13	104	21	17	45	31	9	16	60	23	17	12	12	12	13	14	27	22	18	29	22	7	22	16	909	25.25	1
ACTCAAACTGTGGGGGCACTTTGT_ssc-miR-371-5p	58	60	59	62	89	157	57	129	59	22	94	112	35	99	37	40	27	59	24	60	42	81	92	71	33	30	31	56	43	95	92	71	126	22	65	45	2334	64.8333	1
ACTCAAACTGTGGGGGCACTTTT_ssc-miR-371-5p	855	1624	1041	1711	1268	3739	1937	2701	1571	582	1882	2215	910	2010	1012	765	954	771	571	893	1206	1074	1673	1964	777	397	477	1398	1058	1915	1433	1672	3406	992	917	1103	50474	1402.06	1
ACTCAAACTGTGGGGGCACTTTTA_ssc-miR-371-5p	35	69	37	17	47	48	23	42	19	9	54	151	7	48	34	31	13	31	22	21	21	46	24	42	12	9	23	31	20	33	14	31	44	18	39	20	1185	32.9167	1
ACTCAAACTGTGGGGGCACTTTTG_ssc-miR-371-5p	36	82	52	59	92	53	53	59	69	57	104	118	41	117	71	75	48	73	76	34	86	34	57	57	53	63	35	48	33	55	46	89	43	19	131	31	2249	62.4722	1
ACTCAAACTGTGGGGGCACTTTTT_ssc-miR-371-5p	29	53	40	33	46	83	30	60	26	10	37	52	16	50	26	35	13	22	12	32	17	42	34	43	16	9	6	21	25	22	23	33	66	14	25	23	1124	31.2222	1
ACTCAAACTGTGGGGGCAT_ssc-miR-371-5p	34	135	84	267	66	300	320	410	169	64	143	68	129	414	35	31	267	71	58	37	182	61	293	299	127	34	19	349	421	445	275	164	313	189	43	239	6555	182.083	1
ACTCAAACTGTGGGGGCG_ssc-miR-371-5p	4	10	11	10	18	29	11	19	89	8	30	6	5	133	8	8	83	11	2	11	99	13	18	15	18	3	8	18	18	30	16	27	21	9	14	20	853	23.6944	1
ACTCAAACTGTGGGGGCT_ssc-miR-371-5p	5	11	7	15	19	28	20	26	8	5	27	1	10	43	6	12	17	6	3	7	17	7	35	15	9	2	9	19	13	21	16	18	31	11	6	7	512	14.2222	0
ACTCAAACTGTGGGGGT_ssc-miR-371-5p	81	110	119	819	253	894	927	914	529	269	503	106	566	936	199	228	673	182	194	114	684	101	1237	521	379	162	162	926	772	947	760	640	620	314	315	593	17749	493.028	1
ACTCAAACTGTGGGGT_ssc-miR-371-5p	3	5	6	21	5	27	16	29	15	15	20	2	11	24	4	2	15	5	2	3	24	4	35	13	16	6	2	32	33	34	23	16	24	9	2	14	517	14.3611	0
ACTCCAGCCTGGGCAACATAGCGAGACCCCGTCTCTT_ssc-miR-1285	17	8	15	2	21	21	12	14	18	0	23	8	12	18	9	5	6	20	12	11	22	4	14	0	8	1	9	16	9	18	10	12	26	9	10	9	429	11.9167	0
ACTCGGCGTGGCGTCGGTCG_ssc-miR-1307	7	42	11	4	28	10	17	22	10	22	34	66	4	25	14	9	9	26	9	42	14	10	9	20	16	20	9	12	13	26	15	17	26	9	12	11	650	18.0556	0
ACTCGGCGTGGCGTCGGTCGC_ssc-miR-1307	13	14	11	33	14	35	42	47	18	20	35	36	25	21	33	14	28	13	16	17	27	10	18	36	25	9	9	44	26	41	30	35	47	8	17	21	888	24.6667	1
ACTCGGCGTGGCGTCGGTCGT_ssc-miR-1307	54	131	85	103	91	158	165	159	94	95	188	225	56	80	135	77	56	116	64	100	57	52	96	142	124	78	53	130	103	156	99	135	183	57	111	92	3900	108.333	1
ACTCGGCGTGGCGTCGGTCGTA_ssc-miR-1307	25	41	28	41	25	40	64	55	20	12	51	101	17	32	28	21	39	16	14	21	15	15	27	40	33	9	15	47	34	46	25	27	91	20	15	29	1179	32.75	1
ACTCGGCGTGGCGTCGGTCGTG_ssc-miR-1307	225	997	453	357	494	356	438	384	362	512	825	1351	168	432	613	433	337	484	294	484	287	259	257	399	675	498	244	410	401	531	227	588	639	180	524	221	16339	453.861	1
ACTCGGCGTGGCGTCGGTCGTGA_ssc-miR-1307	99	419	166	277	200	328	319	353	240	160	393	718	112	226	211	202	220	156	150	175	171	140	222	227	240	109	110	307	233	268	184	327	522	146	201	150	8681	241.139	1
ACTCGGCGTGGCGTCGGTCGTGC_ssc-miR-1307	48	90	39	64	102	47	69	57	53	85	152	159	24	49	127	111	44	96	39	67	41	37	60	54	108	69	62	75	45	62	52	134	73	32	97	45	2568	71.3333	1
ACTCGGCGTGGCGTCGGTCGTGG_ssc-miR-1307	1397	4228	1858	2065	3222	2537	2682	2805	2536	2378	4860	6273	1081	2620	3924	3117	1866	2822	1869	2314	1768	1523	1819	2229	3270	2060	1833	2521	1972	2485	1478	3928	2941	1062	3352	1524	92219	2561.64	1
ACTCGGCGTGGCGTCGGTCGTGGA_ssc-miR-1307	79	183	86	118	110	93	127	127	97	110	242	375	42	85	169	109	84	130	125	106	68	70	59	65	138	83	87	105	94	133	63	186	159	54	148	57	4166	115.722	1
ACTCGGCGTGGCGTCGGTCGTGGAA_ssc-miR-1307	26	64	15	35	16	28	41	43	20	28	54	123	11	35	40	28	25	37	41	32	18	27	12	26	42	17	15	37	22	23	22	38	69	19	36	13	1178	32.7222	1
ACTCGGCGTGGCGTCGGTCGTGGAAA_ssc-miR-1307	12	32	9	10	15	15	8	14	7	14	26	66	6	7	22	9	9	8	20	15	6	15	8	11	13	11	6	15	13	7	3	13	10	9	7	3	474	13.1667	0
ACTCGGCGTGGCGTCGGTCGTGGT_ssc-miR-1307	18	61	25	21	38	46	42	54	25	17	56	81	26	42	45	27	33	31	30	26	25	22	26	48	25	23	19	32	40	35	35	56	79	25	32	28	1294	35.9444	1
ACTCGGCGTGGCGTCGGTCGTGT_ssc-miR-1307	35	131	55	168	100	163	180	191	114	45	177	165	82	152	90	63	100	63	43	43	98	43	143	141	106	54	43	185	149	159	137	123	239	79	72	113	4044	112.333	1
ACTCTTTCCCTGTTGCACTAC_hsa-miR-130b-5p	86	128	95	133	94	70	174	93	92	127	160	154	38	104	225	139	113	124	136	103	78	37	47	74	195	157	50	113	69	122	32	173	148	42	145	60	3930	109.167	1
ACTCTTTCCCTGTTGCACTACA_hsa-miR-130b-5p	3	13	6	39	2	17	42	17	7	5	22	9	6	7	8	5	19	6	11	9	12	1	13	16	5	3	3	29	16	23	8	13	49	17	3	10	474	13.1667	0
ACTCTTTCCCTGTTGCACTACC_hsa-miR-130b-5p	26	38	39	205	30	59	177	102	68	49	89	32	29	52	90	40	97	61	80	28	63	17	51	52	78	43	28	128	66	74	28	108	127	41	88	34	2417	67.1389	1
ACTCTTTCCCTGTTGCACTACT_hsa-miR-130b-5p	206	316	191	555	245	288	547	351	264	269	438	277	125	214	588	319	322	304	408	243	192	89	157	220	409	332	159	367	192	327	109	536	433	169	353	159	10673	296.472	1
ACTCTTTCCCTGTTGCACTAT_hsa-miR-130b-5p	6	10	3	24	3	19	47	27	21	12	9	12	16	12	8	4	16	8	16	4	13	1	13	11	13	7	4	15	21	17	8	14	29	10	5	13	471	13.0833	0
ACTGCCCTAAGTGCTCCTTCTG_hsa-miR-18a-3p	14	16	25	12	26	31	7	32	7	4	20	39	4	15	12	11	10	22	8	28	4	30	7	20	9	3	7	6	13	14	5	17	25	3	8	10	524	14.5556	0
ACTGCCCTAAGTGCTCCTTCTGG_hsa-miR-18a-3p	7	15	19	5	12	22	5	22	11	8	22	50	0	6	15	11	7	13	4	10	9	15	11	16	8	7	4	12	5	7	5	18	23	5	6	9	424	11.7778	0
ACTGCCGGGTAATGATGGA_bta-miR-200c	1	11	0	14	1	1	60	0	7	28	27	4	11	10	7	5	31	12	3	4	8	2	8	2	56	41	7	5	5	20	4	17	6	8	9	14	449	12.4722	0
ACTGCCTGGTAATGATGAC_hsa-miR-200b-3p	20	36	10	126	73	37	194	15	53	152	141	16	65	87	248	165	131	85	47	21	64	10	55	39	179	255	73	74	39	78	32	210	37	12	197	25	3101	86.1389	1
ACTGGACTAGGAGTCAGAAGGC_hsa-miR-378i	7	13	14	16	33	19	25	16	7	18	34	47	8	20	37	16	6	26	10	16	9	13	14	12	26	15	12	14	11	17	6	31	18	4	22	10	622	17.2778	0
ACTGGACTCGGAGTCAGAAGG_hsa-mir-378i	10	14	10	9	16	18	10	11	12	17	29	38	1	13	23	17	9	19	6	10	10	15	6	21	21	18	4	13	9	34	5	23	29	10	15	3	528	14.6667	0
ACTGGACTCGGAGTCAGAAGGT_hsa-mir-378i	3	16	8	35	13	25	42	26	39	11	20	31	24	27	10	5	28	8	11	5	8	4	24	24	24	6	4	21	18	37	35	25	32	21	12	27	709	19.6944	0
ACTGGACTTGGAGCCAGAAGG_hsa-miR-378f	5	28	21	14	27	16	12	14	8	32	15	41	3	16	33	14	11	22	5	16	9	14	11	23	22	15	3	15	9	35	5	19	13	9	22	12	589	16.3611	0
ACTGGACTTGGAGCCAGAAGGC_hsa-miR-378f	39	138	71	80	152	96	100	93	76	93	168	245	44	83	192	147	66	116	57	87	54	56	84	76	110	95	48	90	53	83	36	169	114	38	136	66	3451	95.8611	1
ACTGGACTTGGAGCCAGAAGGT_hsa-miR-378f	9	18	9	39	14	33	47	36	30	9	31	30	17	36	14	10	26	12	8	3	16	6	30	26	12	8	5	42	28	36	24	20	43	26	18	29	800	22.2222	1
ACTGGACTTGGAGTC_ssc-miR-378b-3p	32	109	54	209	175	101	246	85	84	232	236	173	94	160	391	267	141	248	101	66	93	53	138	88	247	229	87	155	84	199	81	306	73	51	356	114	5558	154.389	1
ACTGGACTTGGAGTCA_ssc-miR-378b-3p	13	5	15	89	71	17	104	32	44	111	88	10	35	63	128	97	57	106	58	19	29	8	30	22	102	105	35	81	50	74	28	119	14	17	150	40	2066	57.3889	1
ACTGGACTTGGAGTCAG_ssc-miR-378b-3p	3	6	11	25	39	13	22	17	20	29	42	9	4	17	35	21	18	32	21	10	14	7	10	14	25	27	17	24	8	22	10	43	12	6	37	7	677	18.8056	0
ACTGGACTTGGAGTCAGA_ssc-miR-378b-3p	254	647	379	544	892	598	573	594	421	643	1144	1483	211	498	1213	838	330	826	323	532	261	403	382	446	633	565	313	484	381	611	299	1032	674	273	885	384	20969	582.472	1
ACTGGACTTGGAGTCAGAA_ssc-miR-378b-3p	261	764	382	487	916	601	566	554	399	594	1056	1470	200	454	1273	846	365	825	304	492	214	428	379	468	647	524	312	485	356	585	270	904	563	259	865	353	20421	567.25	1
ACTGGACTTGGAGTCAGAAAGC_hsa-miR-378d	13	27	21	7	36	29	19	26	13	13	37	53	11	14	42	29	14	29	12	15	5	5	12	13	17	23	14	12	8	18	12	31	15	14	18	10	687	19.0833	0
ACTGGACTTGGAGTCAGAAG_ssc-miR-378b-3p	88	469	230	172	509	313	241	191	173	303	507	866	88	217	435	334	194	385	82	404	120	192	225	254	374	273	119	167	239	482	131	430	315	137	320	144	10123	281.194	1
ACTGGACTTGGAGTCAGAAGA_ssc-miR-378b-3p	79	424	208	339	220	417	394	371	194	214	391	848	118	267	241	184	289	222	64	271	175	171	235	257	236	168	68	239	299	599	190	333	600	211	210	206	9952	276.444	1
ACTGGACTTGGAGTCAGAAGAC_ssc-miR-378b-3p	15	68	43	35	60	37	62	42	25	39	71	98	15	30	75	50	32	57	21	45	26	27	21	21	59	35	17	33	30	43	17	55	53	19	49	24	1449	40.25	1
ACTGGACTTGGAGTCAGAAGC_ssc-miR-378b-3p	42	102	64	71	110	55	72	34	23	152	150	168	22	43	142	96	43	132	31	154	31	66	30	40	119	98	43	51	65	77	23	114	78	21	137	34	2733	75.9167	1
ACTGGACTTGGAGTCAGAAGCC_ssc-miR-378b-3p	1	12	11	13	29	13	27	14	10	7	11	22	6	13	16	11	13	11	0	9	7	8	21	8	15	9	1	13	6	31	10	14	27	9	7	11	446	12.3889	0
ACTGGACTTGGAGTCAGAAGG_ssc-miR-378	1548	7139	4267	3343	7221	4314	4801	3602	2988	5585	7324	11481	1515	3911	7119	5018	3411	5840	1517	6497	2271	3248	2624	3826	5822	4985	1872	2727	3991	7910	1939	5817	5062	1997	5262	2532	160326	4453.5	1
ACTGGACTTGGAGTCAGAAGGA_ssc-miR-378	260	1463	524	1303	832	1724	1485	1601	901	473	1503	2507	563	1070	876	727	958	682	294	643	546	518	1114	1095	743	404	320	1093	812	1318	863	1233	1963	924	678	884	34897	969.361	1
ACTGGACTTGGAGTCAGAAGGAA_ssc-miR-378	4	55	12	5	42	20	12	30	9	7	24	93	6	18	21	10	4	12	1	18	7	20	19	19	9	5	1	4	8	16	8	22	22	16	8	7	594	16.5	0
ACTGGACTTGGAGTCAGAAGGC_ssc-miR-378	10724	40014	15857	24624	42986	27572	30182	27226	22188	24559	49225	73796	11152	23683	53046	38653	20323	34540	13812	24054	12947	18094	21329	21647	30955	23976	14441	22492	17211	28961	14136	42146	27153	12158	39511	18242	973615	27044.9	1
ACTGGACTTGGAGTCAGAAGGCA_ssc-miR-378	1370	3103	1921	1475	3366	2589	1764	2694	1723	1285	3876	6895	657	1815	3483	1956	1079	2443	867	2259	933	2087	1060	1811	1663	1006	980	1308	1420	2023	1084	3067	3050	1076	1931	1285	72404	2011.22	1
ACTGGACTTGGAGTCAGAAGGCAA_ssc-miR-378	75	117	91	78	132	137	88	138	87	70	205	354	27	87	151	92	44	100	49	111	43	101	47	60	74	39	53	59	64	104	38	118	145	66	60	46	3350	93.0556	1
ACTGGACTTGGAGTCAGAAGGCAC_ssc-miR-378	7	8	11	15	17	19	11	16	9	3	18	18	4	15	10	7	19	18	3	14	10	9	10	8	16	4	8	10	7	29	16	20	25	10	7	12	443	12.3056	0
ACTGGACTTGGAGTCAGAAGGCAG_ssc-miR-378	31	38	31	43	71	61	32	39	50	28	97	106	20	72	76	56	38	68	29	40	37	31	29	29	36	19	26	45	25	55	22	68	42	19	60	27	1596	44.3333	1
ACTGGACTTGGAGTCAGAAGGCAT_ssc-miR-378	16	36	19	35	51	55	63	52	26	10	54	45	20	45	54	26	45	43	17	30	32	39	31	44	25	25	10	38	45	75	29	51	84	21	29	30	1350	37.5	1
ACTGGACTTGGAGTCAGAAGGCC_ssc-miR-378	23	124	77	172	210	189	200	170	120	104	195	209	96	221	143	123	120	166	57	76	86	70	169	112	124	85	50	124	105	145	134	222	147	63	200	166	4797	133.25	1
ACTGGACTTGGAGTCAGAAGGCG_ssc-miR-378	111	369	203	227	357	303	237	255	421	178	365	589	113	620	385	283	390	250	150	150	383	152	181	184	201	179	108	166	138	218	162	291	249	109	406	163	9246	256.833	1
ACTGGACTTGGAGTCAGAAGGCGA_ssc-miR-378	13	32	15	38	44	29	29	29	15	26	52	50	4	27	43	25	19	44	57	18	19	15	20	20	34	21	9	35	15	27	24	50	24	6	50	14	992	27.5556	1
ACTGGACTTGGAGTCAGAAGGCT_ssc-miR-378	84	483	161	419	502	475	522	345	277	194	491	454	247	549	528	322	362	341	123	174	240	207	421	374	269	220	107	288	334	405	363	549	517	204	421	399	12371	343.639	1
ACTGGACTTGGAGTCAGAAGGG_ssc-miR-378	15	84	23	83	31	106	70	106	274	21	68	65	48	361	24	19	486	24	13	22	243	32	99	66	58	16	8	73	64	95	78	48	133	69	33	106	3164	87.8889	1
ACTGGACTTGGAGTCAGAAGGT_ssc-miR-378	1056	5257	1803	10654	3548	10302	12908	9841	7487	2494	7974	8121	4971	8493	4218	3515	8783	3134	1960	1905	4658	1727	9254	7470	4705	2137	1527	9140	6199	10041	6858	7143	10950	5840	4105	7226	217404	6039	1
ACTGGACTTGGAGTCAGAAGT_ssc-miR-378b-3p	9	41	27	100	20	84	92	72	54	17	56	42	43	54	24	13	80	26	11	16	43	16	76	66	44	31	6	80	68	133	46	34	131	54	21	47	1777	49.3611	1
ACTGGACTTGGAGTCAGGAGG_hsa-miR-378e	5	27	17	7	34	21	21	18	13	21	25	54	7	18	29	19	16	21	4	24	8	13	9	18	24	23	12	13	16	31	10	18	25	6	22	9	658	18.2778	0
ACTGGACTTGGAGTCAGGAGGC_hsa-miR-378e	23	144	62	92	195	121	103	110	90	94	193	282	32	70	219	168	81	142	70	93	57	71	94	97	113	93	69	83	54	114	45	161	122	54	156	75	3842	106.722	1
ACTGGACTTGGAGTCAGGAGGT_hsa-miR-378e	10	22	12	57	15	39	66	36	33	11	41	32	27	33	18	19	47	14	11	16	19	5	46	38	23	7	1	43	28	50	25	44	60	28	14	59	1049	29.1389	1
ACTGGGCTTGGAGTCAGAAGG_hsa-miR-378g	4	17	8	13	27	19	37	9	13	19	21	46	7	10	20	16	13	35	9	19	9	8	16	16	18	15	9	10	14	31	10	25	22	11	19	11	606	16.8333	0
ACTGGGCTTGGAGTCAGAAGGC_hsa-miR-378g	44	148	71	97	152	103	147	95	77	91	224	305	47	89	200	158	99	137	44	90	45	71	78	88	152	94	72	72	70	106	53	168	111	52	145	52	3847	106.861	1
ACTGGGCTTGGAGTCAGAAGGT_hsa-miR-378g	3	22	8	42	12	39	54	29	33	6	36	31	22	39	15	8	35	17	8	12	22	6	33	34	17	6	7	45	36	42	32	40	50	30	14	37	922	25.6111	1
ACTGTAAACGCTTTCTGATG_hsa-miR-3607-3p	23	28	6	22	53	11	22	31	27	43	65	10	8	21	68	46	26	31	52	20	54	13	28	12	35	32	35	44	38	40	19	87	13	8	50	11	1132	31.4444	1
ACTGTAAACGCTTTCTGATGTA_hsa-miR-3607-3p	11	15	6	15	35	3	16	15	19	33	41	2	4	15	58	24	25	18	29	8	23	4	18	5	20	12	18	30	14	22	4	51	7	6	34	8	668	18.5556	0
ACTGTACTCCAGCCTGGGC_ssc-mir-1285	12	9	11	60	29	15	46	5	14	11	95	1	18	14	25	37	19	22	32	8	32	4	27	1	25	13	15	33	10	24	19	120	25	8	54	11	904	25.1111	1
ACTGTACTCCAGCCTGGGCA_ssc-mir-1285	16	8	15	34	21	11	10	20	12	2	64	1	7	11	12	20	8	12	14	7	16	5	11	0	11	6	1	13	3	17	11	60	22	10	3	5	499	13.8611	0
ACTGTACTCCAGCCTGGGCAAC_ssc-mir-1285	6	1	4	32	20	4	15	2	2	7	84	1	4	6	11	26	6	6	9	1	12	8	14	0	6	2	4	8	3	8	9	66	4	8	13	6	418	11.6111	0
ACTGTACTCCAGCCTGGGCAACATAGCGAGACCCCGTCTCC_ssc-miR-1285	4	2	7	54	13	24	13	3	1	2	103	3	10	5	0	14	9	11	4	3	19	10	22	2	6	0	4	8	3	20	10	72	54	15	5	2	537	14.9167	0
ACTGTACTCCAGCCTGGGCAACATAGCGAGACCCCGTCTCT_ssc-miR-1285	35	11	33	180	121	153	54	14	17	10	441	15	14	22	6	56	27	49	11	23	35	67	62	4	24	4	26	52	21	40	50	332	242	68	17	18	2354	65.3889	1
ACTGTACTCCAGCCTGGGCAACATAGCGAGACCCCGTCTCTA_ssc-miR-1285	153	42	125	299	444	347	103	32	37	9	1054	40	86	35	48	188	59	112	76	117	122	239	162	5	44	4	142	141	34	113	118	961	539	129	79	57	6295	174.861	1
ACTGTACTCCAGCCTGGGCAACATAGCGAGACCCCGTCTCTC_ssc-miR-1285	33	9	26	291	63	157	126	59	65	8	324	7	92	68	22	45	100	63	95	16	150	28	139	10	62	3	32	186	65	122	101	313	216	105	52	58	3311	91.9722	1
ACTGTACTCCAGCCTGGGCAACATAGCGAGACCCCGTCTCTG_ssc-miR-1285	4	2	10	22	17	23	8	2	27	0	70	0	8	42	0	4	25	7	2	1	70	8	18	0	3	1	3	12	1	9	8	49	31	10	3	8	508	14.1111	0
ACTGTACTCCAGCCTGGGCAACATAGCGAGACCCCGTCTCTGA_ssc-miR-1285	1	0	3	23	23	21	2	0	0	0	47	0	1	1	0	6	1	1	1	0	2	9	5	1	0	0	4	4	0	5	6	40	14	13	2	0	236	6.55556	0
ACTGTACTCCAGCCTGGGCAACATAGCGAGACCCCGTCTCTT_ssc-miR-1285	381	143	221	903	814	718	474	231	302	71	2195	79	286	295	278	486	320	655	558	242	531	331	520	30	383	45	265	672	221	469	329	2038	1035	404	331	293	17549	487.472	1
ACTGTACTCCAGCCTGGGCAACATAGCGAGACCCCGTCTCTTA_ssc-miR-1285	166	42	123	293	324	289	81	89	71	18	970	24	37	46	54	192	44	188	99	111	109	174	80	4	91	15	104	147	48	85	87	1073	433	163	70	55	5999	166.639	1
ACTGTACTCCAGCCTGGGCAACATAGCGAGACCCCGTCTCTTC_ssc-miR-1285	1	1	1	30	3	18	15	5	9	1	30	0	11	10	3	7	5	5	11	5	11	5	16	0	4	1	2	25	5	13	11	48	23	11	3	10	359	9.97222	0
ACTGTACTCCAGCCTGGGCAACATAGCGAGACCCCGTCTCTTT_ssc-miR-1285	46	13	31	107	65	106	47	31	31	7	212	4	30	35	26	53	29	67	62	24	45	27	50	8	32	4	32	66	28	51	46	281	112	56	48	27	1939	53.8611	1
ACTGTCACCTTTTTGAGTAGA_ENSSSCG00000020534	66	59	91	38	85	92	39	77	29	34	151	112	12	37	21	24	17	34	15	84	5	61	33	60	43	23	13	18	27	45	12	37	51	28	27	21	1621	45.0278	1
ACTGTCTGGTAACGATGTT_bta-miR-200a	5	17	2	72	43	31	127	10	27	64	105	9	48	47	80	57	90	50	6	21	14	14	57	39	91	77	16	36	27	59	31	101	20	8	63	31	1595	44.3056	1
ACTTAAACGTGGATGTACT_hsa-miR-302a-5p	26	50	25	53	49	55	73	69	37	26	50	42	21	52	72	43	41	36	35	33	33	25	46	45	41	27	25	34	34	47	36	79	58	16	46	36	1516	42.1111	1
ACTTAAACGTGGATGTACTTA_hsa-miR-302a-5p	8	13	6	25	9	29	29	29	17	2	14	20	11	30	17	8	15	5	11	7	5	5	18	18	11	4	2	13	16	35	17	19	28	9	11	17	533	14.8056	0
ACTTAAACGTGGATGTACTTG_hsa-miR-302a-5p	197	316	311	275	444	401	377	393	292	244	482	461	175	452	645	367	202	509	226	390	162	232	211	306	337	252	164	196	229	390	231	505	309	118	531	224	11556	321	1
ACTTAAACGTGGATGTACTTGA_hsa-miR-302a-5p	32	33	23	59	27	82	66	91	58	14	49	47	30	78	22	19	33	26	15	23	29	12	31	62	17	15	6	24	41	57	56	43	90	32	16	44	1402	38.9444	1
ACTTAAACGTGGATGTACTTGC_hsa-miR-302a-5p	988	1320	1292	1027	1688	1363	1388	1622	915	735	1780	1913	545	1407	2403	1289	631	1657	748	1612	568	961	640	1074	1099	907	698	673	974	1176	792	2194	1360	476	1742	772	42429	1178.58	1
ACTTAAACGTGGATGTACTTGCA_hsa-miR-302a-5p	50	109	63	162	90	196	179	283	95	43	128	164	76	160	106	71	67	85	50	82	58	56	92	134	74	38	32	100	92	141	123	150	225	70	83	92	3819	106.083	1
ACTTAAACGTGGATGTACTTGCC_hsa-miR-302a-5p	201	213	212	517	312	631	658	759	341	135	469	336	279	504	431	249	275	280	200	220	231	209	306	430	260	174	158	363	371	409	404	516	628	224	378	364	12647	351.306	1
ACTTAAACGTGGATGTACTTGCG_hsa-miR-302a-5p	18	26	29	33	38	63	39	59	198	10	41	40	22	290	19	14	188	24	8	37	131	19	26	43	29	11	8	27	30	45	20	32	49	21	9	49	1745	48.4722	1
ACTTAAACGTGGATGTACTTGCT_hsa-miR-302a-5p	1200	1572	1384	1614	1996	2438	2185	2690	1582	670	2091	2486	833	1841	2447	1267	933	1471	873	1519	741	1231	1112	1694	1211	901	880	1179	1237	1596	1253	2382	2359	761	1609	1187	54425	1511.81	1
ACTTAAACGTGGATGTACTTGCTA_hsa-miR-302a-5p	12	16	10	8	21	3	13	7	9	3	20	13	4	12	25	5	4	4	15	11	8	5	2	7	6	2	4	9	4	9	7	14	12	8	8	2	322	8.94444	0
ACTTAAACGTGGATGTACTTGCTT_hsa-miR-302a-5p	11	14	16	25	13	20	22	15	15	12	18	10	8	11	29	10	11	13	14	16	10	14	12	11	10	6	8	8	10	13	13	14	22	9	17	12	492	13.6667	0
ACTTAAACGTGGATGTACTTGT_hsa-miR-302a-5p	108	212	124	442	154	525	628	590	301	67	349	202	218	487	193	129	251	141	113	131	214	69	275	363	172	69	114	267	335	393	345	408	536	229	194	303	9651	268.083	1
ACTTGTCCCGGCCTGC_ssc-miR-92a	3	3	5	27	10	18	27	14	18	9	21	4	18	24	12	13	14	10	5	4	10	5	39	18	20	8	4	17	17	12	19	22	17	10	8	14	499	13.8611	0
ACTTGTCCCGGCCTGT_ssc-miR-92a	24	16	34	80	85	66	98	90	59	58	86	12	39	64	70	46	42	55	36	40	60	28	60	26	59	48	48	77	52	76	43	117	43	34	69	20	1960	54.4444	1
ACTTTAACATGGGAGTGCTTTC_ENSSSCG00000018952	11	12	17	4	20	19	4	14	3	6	17	20	4	16	12	1	1	5	3	21	2	12	0	9	9	5	4	6	19	15	3	15	29	5	9	5	357	9.91667	0
ACTTTAACATGGGAGTGCTTTCT_ENSSSCG00000018952	22	24	37	10	46	72	31	78	26	15	48	81	12	24	36	8	6	21	7	47	4	42	16	39	22	9	15	29	36	33	13	31	79	12	18	16	1065	29.5833	1
AGAAGTTGACTGAAG_hsa-miR-3653-3p	15	19	12	28	28	12	54	15	18	47	48	2	21	42	62	39	25	44	45	14	35	9	29	9	56	59	24	28	20	22	11	44	6	9	62	9	1022	28.3889	1
AGACTGATGTTGACT_bta-miR-21-5p	0	10	21	33	47	43	55	37	31	25	55	2	18	44	18	27	28	24	10	31	18	21	65	43	50	32	14	30	34	68	32	38	60	22	16	37	1139	31.6389	1
AGAGATCAGAGGCGCAGAGC_bta-miR-6529a	5	19	6	22	8	15	28	14	18	7	20	10	3	14	13	5	22	8	11	4	16	5	7	7	32	9	7	29	15	22	7	16	32	8	11	7	482	13.3889	0
AGAGATCAGAGGCGCAGAGT_bta-miR-6529a	27	87	36	46	25	30	125	59	47	71	81	105	13	39	105	51	80	34	77	34	44	17	26	25	101	60	22	77	45	68	23	63	92	40	59	27	1961	54.4722	1
AGAGGGGCAGAGAGCGAGACT_hsa-mir-423	21	30	13	23	15	9	30	25	24	12	27	20	4	24	11	10	16	11	24	18	25	9	15	10	17	13	7	29	22	30	6	14	36	10	21	15	646	17.9444	0
AGAGGGGCAGAGAGCGAGACTT_hsa-mir-423	20	41	32	44	17	22	36	36	23	10	47	43	7	17	22	8	21	18	22	20	16	11	10	23	26	11	5	23	16	23	13	27	61	14	11	7	803	22.3056	1
AGAGGGGCAGAGAGCGAGACTTC_hsa-mir-423	13	8	3	36	4	15	51	20	18	2	21	8	9	15	7	5	12	6	22	2	26	5	11	9	8	3	5	23	19	20	15	14	45	10	9	7	506	14.0556	0
AGAGGGGCAGAGAGCGAGACTTT_hsa-mir-423	124	90	92	162	44	77	161	129	87	74	140	104	39	76	107	52	69	89	197	73	106	41	20	55	100	81	32	93	78	72	40	106	181	41	73	40	3145	87.3611	1
AGAGGGGCAGAGAGCGAGACTTTT_hsa-mir-423	14	13	16	12	7	5	10	19	16	9	22	14	1	5	11	10	13	9	23	16	8	6	9	8	10	5	4	5	20	13	5	9	29	6	4	5	391	10.8611	0
AGAGGTAGTAGGTTGCAT_ssc-let-7d-5p	7	24	6	4	6	4	33	15	5	6	20	18	2	8	4	1	5	4	3	6	5	6	1	2	9	12	2	4	5	4	9	4	24	9	1	7	285	7.91667	0
AGAGGTAGTAGGTTGCATAGC_ssc-let-7d-5p	2	13	9	6	1	8	39	14	7	4	16	10	5	12	3	0	14	4	1	11	7	3	3	9	13	4	1	6	4	10	17	4	56	15	1	23	355	9.86111	0
AGAGGTAGTAGGTTGCATAGT_ssc-let-7d-5p	11	151	45	34	41	33	151	58	31	30	89	97	33	45	18	5	34	35	6	62	17	31	13	37	87	36	8	22	24	58	41	22	247	47	15	75	1789	49.6944	1
AGAGGTAGTAGGTTGCATAGTC_ssc-let-7d-5p	3	37	22	38	10	36	87	54	35	15	64	26	13	35	7	4	33	8	5	21	23	12	7	30	25	10	0	26	20	52	30	13	178	49	8	29	1065	29.5833	1
AGAGGTAGTAGGTTGCATAGTT_ssc-let-7d-5p	74	378	140	106	104	160	351	202	103	91	306	297	64	120	66	23	108	73	51	219	69	71	41	74	193	79	33	69	87	167	102	64	744	167	58	144	5198	144.389	1
AGAGGTAGTAGGTTGCATAGTTT_ssc-let-7d-5p	1	43	5	6	7	4	30	13	5	3	20	11	9	2	3	0	1	4	0	11	4	11	3	10	20	2	1	1	1	7	4	2	69	13	1	19	346	9.61111	0
AGAGTTGAGTCTGGACGTCCCG_ssc-miR-219a	21	21	11	33	42	33	31	35	38	15	60	58	23	58	57	42	24	44	51	15	15	11	24	25	40	35	21	37	9	8	32	50	21	5	75	20	1140	31.6667	1
AGCACCATCTGAAATCGGTTA_ssc-miR-29a	0	20	9	2	20	18	10	3	3	1	22	49	1	1	9	8	4	6	1	34	1	6	19	23	10	2	3	5	11	13	3	20	43	5	1	8	394	10.9444	0
AGCAGCAATTCATGTTTTGAA_ssc-miR-424-5p	5	12	10	2	20	20	8	16	3	8	17	61	1	4	13	11	3	10	2	29	3	25	8	11	13	4	5	4	6	5	6	15	26	4	10	9	409	11.3611	0
AGCAGCACGTAAATATTGGCG_ssc-miR-16	4	15	12	8	18	13	3	11	7	4	16	43	1	5	9	7	7	11	3	15	2	12	7	9	6	2	2	3	6	10	3	10	20	10	2	3	319	8.86111	0
AGCAGCATTGTACAGGGCT_ssc-miR-107	5	11	16	23	12	11	35	11	9	32	40	40	9	11	13	15	15	23	13	11	9	2	16	18	28	9	4	17	11	35	18	10	42	12	15	25	626	17.3889	0
AGCAGCATTGTACAGGGCTAT_ssc-miR-107	17	48	45	24	62	99	39	26	13	16	74	104	18	25	32	25	21	14	3	56	10	36	22	35	31	7	7	18	21	63	20	43	111	37	10	22	1254	34.8333	1
AGCAGCATTGTACAGGGCTATA_ssc-miR-107	15	28	26	19	17	48	35	53	23	7	23	67	14	26	6	5	10	8	3	20	9	14	18	31	27	14	6	23	17	23	10	14	75	17	11	12	774	21.5	1
AGCAGCATTGTACAGGGCTATC_ssc-miR-107	33	73	36	12	66	47	25	55	26	28	90	242	8	21	23	16	22	20	16	75	14	32	22	20	25	11	10	27	31	43	9	23	80	23	15	12	1331	36.9722	1
AGCAGCATTGTACAGGGCTATCA_ssc-miR-107	29	134	61	8	50	37	9	80	26	11	60	415	7	13	7	6	6	10	6	105	2	25	6	24	20	3	17	16	21	13	7	9	130	17	3	6	1399	38.8611	1
AGCAGCATTGTACAGGGCTATG_ssc-miR-103	349	749	433	252	529	539	397	568	340	301	677	1317	152	317	322	203	166	467	164	666	148	371	184	387	468	212	205	282	274	407	224	316	752	177	334	277	13926	386.833	1
AGCAGCATTGTACAGGGCTATGA_ssc-miR-103	426	1361	712	278	877	999	451	855	404	316	1291	2820	173	353	647	445	280	409	185	1049	176	687	309	465	462	222	276	279	374	633	230	549	1583	408	367	286	21637	601.028	1
AGCAGCATTGTACAGGGCTATGAA_ssc-miR-103	14	69	33	7	27	31	24	42	14	12	49	112	8	14	24	17	10	23	8	46	15	17	10	26	20	12	13	16	21	18	12	16	63	15	23	7	888	24.6667	1
AGCAGCATTGTACAGGGCTATGAT_ssc-miR-103	8	51	15	21	30	47	33	39	24	13	47	42	13	27	29	18	9	19	6	28	5	26	15	27	32	23	17	20	19	33	18	26	51	11	16	19	877	24.3611	1
AGCAGCATTGTACAGGGCTATGG_ssc-miR-103	9	25	8	3	9	13	9	12	39	3	10	25	3	55	2	7	38	3	1	9	18	9	14	13	13	2	4	4	5	12	5	8	23	6	7	10	436	12.1111	0
AGCAGCATTGTACAGGGCTATGT_ssc-miR-103	6	32	23	15	25	59	31	33	11	12	50	67	9	18	9	14	24	12	7	27	11	29	18	36	27	11	8	6	18	27	23	14	92	22	18	25	869	24.1389	1
AGCAGCATTGTACAGGGCTATT_ssc-miR-107	2	12	2	3	2	18	14	15	6	1	8	13	3	11	3	4	5	5	3	8	1	1	9	2	0	1	2	6	5	11	8	3	24	9	2	17	239	6.63889	0
AGCAGCGGGAACAGTACT_ssc-miR-503	9	20	11	38	34	30	36	22	25	27	31	25	16	19	51	29	31	27	16	13	17	15	31	16	49	26	12	29	26	35	19	48	20	11	30	19	913	25.3611	1
AGCAGCGGGAACAGTACTG_ssc-miR-503	11	87	43	28	106	73	63	51	42	76	77	112	14	48	115	86	24	67	28	74	26	60	51	56	99	77	40	40	50	108	38	88	69	32	67	24	2150	59.7222	1
AGCAGCGGGAACAGTACTGCAG_ssc-miR-503	13	22	19	6	36	44	11	27	11	13	42	100	9	13	16	9	13	26	8	48	7	26	20	33	23	10	5	11	18	28	8	36	45	11	15	14	796	22.1111	1
AGCAGCGGGAACAGTACTGCAGA_ssc-miR-503	5	24	11	2	23	36	6	23	4	5	36	59	3	15	9	8	2	14	3	41	8	31	8	18	12	2	5	9	16	15	9	25	35	12	4	10	548	15.2222	0
AGCATGTGATGAAGCAAATCAGTATGAATAAAGTCGTGATACTGTAAACGCTTTCTGATG_hsa-miR-3607-5p	4	9	2	7	3	0	1	3	2	18	6	6	5	3	2	22	19	14	22	3	2	3	3	1	9	13	15	15	22	1	6	35	3	12	22	2	315	8.75	0
AGCCAGTTTGGGAAGAATGCTG_ssc-mir-7857	11	6	10	24	26	13	7	12	9	12	24	26	5	4	22	7	8	12	18	19	5	16	12	5	17	11	2	19	3	14	6	15	12	3	17	9	441	12.25	0
AGCTAAGCAGGGTCGGGC_hsa-mir-7641-2	20	11	17	7	16	16	12	31	14	27	30	5	6	20	14	6	9	12	25	21	26	7	15	19	27	12	7	30	7	17	7	27	20	6	12	10	568	15.7778	0
AGCTAAGCAGGGTCGGGCC_hsa-mir-7641-2	38	25	40	9	30	34	25	49	44	39	78	22	21	43	61	15	26	29	33	37	37	32	29	54	38	28	20	50	21	60	13	33	43	14	25	28	1223	33.9722	1
AGCTAAGCAGGGTCGGGCCTGGT_hsa-mir-7641-2	20	30	14	13	19	35	21	24	15	14	32	27	20	69	25	10	21	22	29	14	29	21	22	21	21	18	10	17	10	41	49	12	34	13	15	22	829	23.0278	1
AGCTAAGCAGGGTCGGGCCTGGTTAGTACTTGG_hsa-mir-7641-2	17	12	15	3	28	18	8	18	5	9	13	13	4	15	8	1	1	11	1	16	14	10	5	15	14	3	3	3	11	19	8	7	15	4	1	6	354	9.83333	0
AGCTAAGCAGGGTCGGGCCTGGTTAGTACTTGGAT_hsa-mir-7641-2	7	5	11	2	25	28	8	21	8	24	15	9	10	14	25	7	15	8	10	9	13	12	19	10	27	19	9	15	13	26	15	10	10	5	14	10	488	13.5556	0
AGCTAAGCAGGGTCGGGCCTGGTTAGTACTTGGATG_hsa-mir-7641-2	25	6	22	2	32	18	16	25	22	26	28	21	6	32	34	10	6	41	36	11	45	9	12	18	21	30	9	19	13	28	8	11	13	9	25	7	696	19.3333	0
AGCTAAGCAGGGTCGGGCCTGGTTAGTACTTGGATGG_hsa-mir-7641-2	24	13	29	5	37	21	18	31	33	63	42	13	16	37	65	20	36	38	62	24	34	17	20	35	60	50	26	41	26	39	11	38	27	13	61	21	1146	31.8333	1
AGCTAAGCAGGGTCGGGCCTGGTTAGTACTTGGATGGGA_hsa-mir-7641-2	16	10	31	8	29	22	10	24	22	45	31	7	11	29	51	14	20	16	36	17	19	17	16	23	28	29	18	35	15	36	9	30	17	7	40	15	803	22.3056	1
AGCTAATCAGACTGATGTTGAC_hsa-mir-21	8	17	4	9	13	18	20	3	4	7	21	26	2	13	12	17	12	15	3	4	7	5	13	14	14	10	7	8	6	13	3	17	19	7	8	11	390	10.8333	0
AGCTACATCTGGCTACTGGGTCT_ssc-miR-222	4	24	12	6	24	21	30	16	7	6	22	23	7	17	7	6	13	10	1	21	2	18	13	23	19	6	3	6	16	20	15	18	74	21	3	25	559	15.5278	0
AGCTACATCTGGCTACTGGGTCTC_ssc-miR-222	47	86	74	109	184	183	117	138	120	120	124	132	29	96	352	268	82	102	176	123	38	202	190	328	117	56	69	121	101	111	70	688	256	55	200	97	5361	148.917	1
AGCTACATCTGGCTACTGGGTCTCA_ssc-miR-222	16	16	16	9	15	23	9	22	20	8	17	23	3	17	39	30	4	5	8	26	4	37	35	42	7	2	7	12	19	24	8	57	54	4	14	15	667	18.5278	0
AGCTACATCTGGCTACTGGGTCTCC_ssc-miR-222	2	8	8	21	18	21	18	15	8	16	8	15	6	27	30	26	12	11	18	18	6	17	32	29	11	3	10	13	15	15	14	63	32	9	15	19	609	16.9167	0
AGCTACATCTGGCTACTGGGTCTCT_ssc-miR-222	18	26	14	35	28	51	98	30	33	32	37	31	13	42	67	43	43	27	43	23	19	32	49	65	34	25	9	36	35	25	29	142	100	21	39	29	1423	39.5278	1
AGCTACATCTGGCTACTGGGTCTT_ssc-miR-222	7	10	9	23	4	43	28	33	22	6	12	13	5	15	11	15	18	8	14	9	7	13	66	55	16	5	5	27	16	21	17	52	79	21	20	17	742	20.6111	1
AGCTACATTGTCTGCTGGGTTT_ssc-miR-221-3p	5	57	31	5	52	75	21	50	12	11	34	69	8	35	16	5	4	10	1	39	2	49	27	68	18	7	9	10	20	37	31	24	145	30	7	35	1059	29.4167	1
AGCTACATTGTCTGCTGGGTTTC_ssc-miR-221-3p	15	97	30	15	77	71	28	62	22	15	42	118	10	23	50	19	16	28	12	68	8	56	51	76	17	10	22	25	42	64	16	72	161	33	21	29	1521	42.25	1
AGCTACATTGTCTGCTGGGTTTCT_ssc-miR-221-3p	2	82	9	8	7	15	28	21	6	8	31	15	4	6	5	3	13	3	1	24	6	9	6	4	18	7	2	1	8	14	7	6	65	15	6	11	476	13.2222	0
AGCTACATTGTCTGCTGGGTTTT_ssc-miR-221-3p	1	27	3	4	9	27	9	12	2	0	11	22	4	6	1	1	8	1	0	10	0	7	5	21	4	0	1	3	7	14	4	8	78	17	1	6	334	9.27778	0
AGCTCATCAGACTGATGTTGAC_hsa-mir-21	12	60	29	42	100	61	109	42	31	68	92	129	35	41	81	96	47	68	18	40	20	38	55	56	83	61	27	48	39	62	34	91	65	35	91	33	2039	56.6389	1
AGCTCGGCCTGAGGCCCCTCAGT_hsa-mir-423	7	12	13	19	20	15	16	27	7	16	29	15	7	13	14	8	10	15	5	11	4	10	10	14	22	8	8	30	13	12	15	14	16	18	12	11	496	13.7778	0
AGCTCGGTCCGAGGCCCCTCAGT_hsa-mir-423	11	14	10	11	13	19	22	18	8	11	19	16	5	12	25	8	15	7	6	15	7	8	15	12	23	11	5	17	16	15	13	21	16	6	16	12	478	13.2778	0
AGCTCGGTCTGAGGCCCCCCAGT_hsa-mir-423	1	18	6	17	20	20	15	20	15	9	25	21	5	23	18	11	17	12	7	15	6	13	19	20	21	9	9	14	18	24	11	29	20	12	15	9	544	15.1111	0
AGCTCGGTCTGAGGCCCCT_ssc-miR-423-3p	2	16	21	49	15	10	30	17	12	10	36	45	12	15	15	12	22	54	5	14	18	5	22	17	19	10	5	10	19	34	16	22	34	12	29	48	732	20.3333	1
AGCTCGGTCTGAGGCCCCTA_ssc-miR-423-3p	3	10	4	32	4	15	46	19	18	8	16	11	14	19	5	12	17	8	8	6	14	5	12	19	13	9	6	36	24	24	14	16	35	13	5	10	530	14.7222	0
AGCTCGGTCTGAGGCCCCTC_ssc-miR-423-3p	406	643	407	847	598	439	977	662	626	803	1165	812	253	429	1203	695	673	755	634	599	468	297	360	503	1001	796	385	856	519	633	357	1139	780	245	893	320	23178	643.833	1
AGCTCGGTCTGAGGCCCCTCA_ssc-miR-423-3p	34	143	67	110	75	47	150	84	50	116	152	109	26	57	94	93	93	109	64	70	61	23	51	64	187	155	53	73	76	107	39	83	103	42	129	50	3039	84.4167	1
AGCTCGGTCTGAGGCCCCTCAA_ssc-miR-423-3p	7	31	16	21	7	25	26	29	13	7	33	56	15	10	13	12	14	11	9	14	9	4	10	18	14	11	6	32	20	21	13	9	59	17	15	12	639	17.75	0
AGCTCGGTCTGAGGCCCCTCAG_ssc-miR-423-3p	230	548	414	318	421	336	407	371	289	386	698	1008	138	304	478	309	258	409	203	512	227	299	149	283	430	324	185	292	316	385	190	449	676	168	374	203	12987	360.75	1
AGCTCGGTCTGAGGCCCCTCAGA_ssc-miR-423-3p	65	144	62	172	104	146	194	181	106	115	258	235	61	116	171	108	128	137	75	138	80	85	104	131	191	120	57	143	140	149	103	174	302	82	147	114	4838	134.389	1
AGCTCGGTCTGAGGCCCCTCAGAA_ssc-miR-423-3p	11	23	11	31	14	17	34	20	13	13	41	23	7	7	22	21	13	28	21	14	11	7	10	11	20	16	14	14	12	20	12	25	27	10	18	13	624	17.3333	0
AGCTCGGTCTGAGGCCCCTCAGC_ssc-miR-423-3p	347	398	349	1423	475	934	1551	1403	838	548	1243	703	565	845	733	457	1000	626	441	441	719	304	732	830	874	539	317	1386	963	1142	805	1134	1773	530	717	682	28767	799.083	1
AGCTCGGTCTGAGGCCCCTCAGG_ssc-miR-423-3p	22	84	40	61	37	72	65	93	310	24	75	65	39	399	31	25	461	32	20	51	362	18	57	49	101	31	12	56	56	70	38	56	114	42	27	71	3166	87.9444	1
AGCTCGGTCTGAGGCCCCTCAGT_ssc-miR-423-3p	2069	3653	2729	4720	4064	4449	5746	5560	3854	3396	7481	6230	1948	3710	5182	3110	3634	3872	2482	3610	2652	2302	2895	4015	4818	3421	1886	5105	3879	4923	2950	5675	7443	2169	4216	2811	142659	3962.75	1
AGCTCGGTCTGAGGCCCCTCAGTA_ssc-miR-423-3p	203	326	203	248	286	168	289	276	186	216	448	555	87	170	365	324	169	320	199	293	166	179	134	173	382	233	163	272	213	290	127	433	434	94	303	99	9026	250.722	1
AGCTCGGTCTGAGGCCCCTCAGTAA_ssc-miR-423-3p	17	21	19	21	11	11	11	20	17	4	27	53	3	11	16	12	7	15	8	18	4	9	4	5	10	7	4	16	11	20	6	15	23	9	8	5	478	13.2778	0
AGCTCGGTCTGAGGCCCCTCAGTAG_ssc-miR-423-3p	24	57	27	39	36	25	40	27	38	28	62	57	17	32	52	44	31	33	40	20	35	9	28	23	48	36	29	29	39	32	30	46	34	11	45	20	1223	33.9722	1
AGCTCGGTCTGAGGCCCCTCAGTC_ssc-miR-423-3p	3	24	3	19	4	11	55	18	10	5	17	14	12	23	7	7	19	7	9	7	13	6	10	18	30	6	3	17	13	16	17	19	47	12	3	22	526	14.6111	0
AGCTCGGTCTGAGGCCCCTCAGTG_ssc-miR-423-3p	10	35	12	22	23	8	20	24	22	19	43	53	9	57	25	30	19	19	12	7	23	5	10	12	37	23	12	21	8	21	9	44	19	6	34	16	769	21.3611	1
AGCTCGGTCTGAGGCCCCTCAGTT_ssc-miR-423-3p	15	154	35	77	68	51	174	54	35	38	124	53	59	60	61	40	76	84	35	59	38	40	43	62	81	51	30	60	56	73	59	98	167	43	54	82	2389	66.3611	1
AGCTCGGTCTGAGGCCCCTT_ssc-miR-423-3p	18	53	17	229	26	95	228	144	115	48	88	42	50	94	32	31	153	22	47	25	103	12	74	96	97	33	11	200	115	122	76	115	210	56	37	57	2971	82.5278	1
AGCTCGGTCTGGGGCCCCTCAGT_hsa-mir-423	7	15	18	22	16	18	22	24	20	18	29	21	10	18	17	15	15	14	6	10	9	15	10	27	29	12	13	20	14	18	13	26	35	8	16	10	610	16.9444	0
AGCTGCCAGTTGAAGAACT_ssc-miR-22-3p	10	18	28	55	23	15	38	15	10	22	53	31	20	27	28	14	37	31	12	30	14	9	28	25	40	32	10	20	26	41	32	42	34	18	25	38	951	26.4167	1
AGCTGCCAGTTGAAGAACTGA_ssc-miR-22-3p	20	32	27	31	48	83	60	42	38	17	58	91	12	44	30	21	31	32	10	37	25	25	36	68	32	7	8	32	22	66	24	41	71	31	16	26	1294	35.9444	1
AGCTGCCAGTTGAAGAACTGC_ssc-miR-22-3p	75	102	125	353	258	464	409	320	178	144	402	364	196	261	161	128	280	187	77	182	140	111	383	331	237	131	92	316	214	405	273	370	494	201	189	250	8803	244.528	1
AGCTGCCAGTTGAAGAACTGG_ssc-miR-22-3p	1	28	12	10	15	38	17	26	67	6	22	27	7	101	5	5	99	13	3	18	42	11	18	21	27	9	8	7	9	25	6	17	36	10	5	34	805	22.3611	1
AGCTGCCAGTTGAAGAACTGT_ssc-miR-22-3p	451	790	835	1113	1551	1992	1461	1218	777	953	1879	2611	622	1136	1010	885	958	1264	415	1100	452	735	1377	1450	1254	771	450	1141	967	1672	831	1653	1955	731	938	1122	40520	1125.56	1
AGCTGCCAGTTGAAGAACTGTA_ssc-miR-22-3p	9	18	25	12	29	24	13	15	9	10	36	92	10	18	19	17	14	20	5	25	7	16	17	24	21	9	6	12	19	22	25	35	26	7	9	17	692	19.2222	0
AGCTTACCAGACTGATGTTGAC_hsa-mir-21	23	95	48	64	142	71	131	51	44	97	152	144	37	65	114	113	72	130	42	81	23	42	78	66	139	109	39	62	52	91	46	129	92	38	105	67	2894	80.3889	1
AGCTTATCAGACAGATGTTGAC_hsa-mir-21	7	22	8	12	29	11	28	12	5	24	34	34	3	14	35	32	13	22	3	11	3	3	16	16	44	29	6	6	17	25	9	21	19	4	28	9	614	17.0556	0
AGCTTATCAGACCGATGTTGAC_hsa-mir-21	22	73	31	83	130	93	123	52	40	92	139	154	30	65	110	106	73	102	26	66	15	69	65	75	98	94	38	54	52	95	31	129	89	42	113	50	2719	75.5278	1
AGCTTATCAGACTAATGTTGAC_hsa-mir-21	5	14	6	18	25	15	19	12	18	22	32	40	6	20	23	20	16	24	9	11	5	9	19	21	26	17	9	15	15	25	6	26	21	8	18	11	606	16.8333	0
AGCTTATCAGACTGACGTTGAC_hsa-mir-21	18	75	23	57	91	63	116	29	31	75	130	115	30	53	93	72	60	91	29	61	12	37	61	58	76	76	27	54	38	77	27	89	71	29	90	42	2176	60.4444	1
AGCTTATCAGACTGATATTGAC_hsa-mir-21	4	21	8	14	25	19	32	12	13	16	21	29	8	17	31	22	15	29	8	10	2	12	19	14	30	29	9	22	12	24	14	21	23	12	28	18	643	17.8611	0
AGCTTATCAGACTGATG_ssc-miR-21	10	44	24	90	92	36	170	28	50	148	147	63	75	68	88	109	87	222	25	38	35	16	64	45	201	148	42	75	70	96	90	140	42	25	216	159	3078	85.5	1
AGCTTATCAGACTGATGC_ssc-miR-21	1	10	2	12	1	18	30	6	6	4	29	20	19	8	7	2	23	17	3	6	5	2	11	15	16	2	4	6	14	32	21	14	22	10	11	44	453	12.5833	0
AGCTTATCAGACTGATGCTGAC_hsa-mir-21	30	89	29	50	107	63	90	55	43	88	166	152	26	43	105	106	75	92	32	68	18	49	70	55	123	91	28	50	53	92	37	114	87	42	96	57	2571	71.4167	1
AGCTTATCAGACTGATGT_ssc-miR-21	8	85	29	47	41	62	132	47	30	53	138	156	51	35	24	24	66	107	14	59	9	23	39	73	107	46	18	39	42	79	75	58	151	65	47	158	2237	62.1389	1
AGCTTATCAGACTGATGTT_ssc-miR-21	6	29	22	38	32	35	75	22	9	22	88	90	26	20	15	11	32	104	3	52	9	13	38	39	60	30	11	21	35	46	61	37	94	37	53	132	1447	40.1944	1
AGCTTATCAGACTGATGTTA_ssc-miR-21	2	40	11	27	7	26	57	29	16	11	38	73	21	20	5	3	55	19	3	18	3	9	21	46	22	9	1	18	39	43	35	24	171	51	10	49	1032	28.6667	1
AGCTTATCAGACTGATGTTG_ssc-miR-21	64	1039	256	258	569	444	793	308	212	425	1283	1675	223	382	361	238	496	563	68	920	87	360	279	543	933	513	134	190	408	568	350	441	1615	434	353	639	18424	511.778	1
AGCTTATCAGACTGATGTTGA_ssc-miR-21	142	1477	449	267	760	726	792	501	266	433	1630	2546	264	401	390	292	353	649	71	1184	92	622	337	605	959	484	152	208	515	743	386	595	2502	604	288	596	23281	646.694	1
AGCTTATCAGACTGATGTTGAA_ssc-miR-21	54	380	115	327	214	438	695	277	186	188	497	580	182	289	169	152	365	183	64	209	96	145	346	306	377	170	81	213	249	479	234	276	719	388	145	317	10105	280.694	1
AGCTTATCAGACTGATGTTGAAA_hsa-mir-21	4	71	13	14	29	21	67	12	6	25	54	61	16	27	35	17	23	24	8	38	4	16	12	19	44	36	6	8	19	27	12	27	48	17	19	24	903	25.0833	1
AGCTTATCAGACTGATGTTGAC_ssc-miR-20a	6875	25649	10739	22032	34352	25545	38543	16085	13094	27296	45533	47381	9939	17408	35572	36270	23862	31560	10086	22641	7333	14947	22610	20649	35981	29146	9986	16598	18492	27931	11152	37092	25949	13101	31965	17290	840684	23352.3	1
AGCTTATCAGACTGATGTTGACA_bta-miR-21-5p	590	3095	913	1105	2126	1735	2005	1176	759	1232	2916	4687	544	1081	1954	1566	1232	1620	570	1680	423	1184	1055	1272	1883	1218	596	831	1164	1609	768	1840	2367	1014	1297	994	52101	1447.25	1
AGCTTATCAGACTGATGTTGACC_bta-miR-21-5p	176	704	339	988	961	892	1460	579	475	734	1228	1064	580	890	647	729	911	1022	322	428	381	438	1019	684	876	687	253	674	639	907	651	968	839	465	1078	774	26462	735.056	1
AGCTTATCAGACTGATGTTGACG_bta-miR-21-5p	31	201	54	99	120	141	137	82	223	61	160	165	58	388	60	63	537	78	29	68	191	60	107	69	144	55	25	55	98	92	65	102	165	70	54	134	4241	117.806	1
AGCTTATCAGACTGATGTTGACT_bta-miR-21-5p	319	2256	574	1701	1718	2045	3190	1138	960	1230	2373	2464	1043	1518	1297	1317	1742	1358	464	1045	643	681	1889	1454	1972	1328	433	1139	1346	1892	1267	1794	2248	1187	1371	1675	52071	1446.42	1
AGCTTATCAGACTGATGTTGAG_ssc-miR-21	3	19	6	25	13	54	48	18	50	8	15	13	20	127	8	12	184	6	2	11	43	3	39	18	22	11	2	16	22	32	24	14	48	22	14	46	1018	28.2778	1
AGCTTATCAGACTGATGTTGAT_ssc-miR-21	365	1750	589	4685	1205	5161	8531	2769	2136	1156	3542	2396	2276	3188	1254	1326	5014	1234	712	719	1380	600	4708	3722	2577	1086	452	3258	3223	5045	2717	3062	4994	3396	1409	3440	95077	2641.03	1
AGCTTATCAGACTGATGTTGCC_ssc-miR-21	52	158	79	1	237	171	251	96	90	4	298	295	2	90	232	8	6	8	0	147	40	94	6	121	10	7	2	0	1	164	3	4	147	9	1	5	2839	78.8611	1
AGCTTATCAGACTGATGTTGCT_ssc-miR-21	4	21	2	2	12	51	101	38	27	0	36	33	0	37	23	0	1	0	0	7	9	7	7	35	1	0	0	0	0	53	2	2	49	1	1	2	564	15.6667	0
AGCTTATCAGACTGATGTTGG_ssc-miR-21	4	41	7	4	14	18	13	9	29	10	19	30	6	51	4	3	55	15	0	16	15	17	5	13	30	3	3	1	14	15	9	4	53	15	2	33	580	16.1111	0
AGCTTATCAGACTGATGTTGGC_ssc-miR-21	52	189	89	111	237	178	285	118	69	153	320	292	61	128	232	207	135	163	42	162	49	92	150	141	196	153	54	82	99	202	60	158	164	71	152	85	5131	142.528	1
AGCTTATCAGACTGATGTTGGT_ssc-miR-21	5	23	4	46	23	64	98	31	26	13	42	31	27	41	11	17	45	19	8	14	15	7	59	43	29	8	2	39	34	60	20	31	51	34	14	34	1068	29.6667	1
AGCTTATCAGACTGATGTTGT_ssc-miR-21	1	29	6	10	18	27	31	13	11	2	19	27	4	3	4	7	23	8	0	19	4	8	10	21	7	5	1	7	6	22	8	11	86	31	4	24	517	14.3611	0
AGCTTATCAGACTGATGTTGTC_ssc-miR-21	20	103	45	27	133	94	141	70	57	19	179	195	10	68	133	21	21	30	5	84	23	53	21	95	29	13	7	22	24	101	11	27	90	17	26	20	2034	56.5	1
AGCTTATCAGACTGGTGTTGAC_hsa-mir-21	33	119	37	72	128	99	150	50	44	119	194	192	43	72	172	141	92	119	34	86	32	51	74	80	139	112	41	72	71	113	59	161	95	51	113	73	3333	92.5833	1
AGCTTATCAGACTGTTGTTGAC_hsa-mir-21	4	9	14	8	22	10	15	2	6	12	24	37	5	7	9	19	12	21	7	11	3	10	19	13	23	12	3	4	7	17	4	23	23	7	13	9	444	12.3333	0
AGCTTATCAGGCTGATGTTGAC_hsa-mir-21	25	91	29	79	117	103	116	60	50	92	158	173	46	74	121	127	78	100	38	72	15	33	69	78	155	102	29	57	54	89	34	126	114	39	104	60	2907	80.75	1
AGCTTATCGGACTGATGTTGAC_hsa-mir-21	31	94	47	82	126	135	144	64	44	100	221	177	28	67	133	123	107	143	32	102	26	56	81	98	142	131	31	62	86	106	35	153	101	48	120	85	3361	93.3611	1
AGCTTATCTGACTGATGTTGAC_hsa-mir-21	7	31	20	13	33	30	39	20	10	24	34	49	17	9	36	33	25	20	14	24	3	22	24	17	36	24	15	18	20	30	10	45	24	17	26	19	838	23.2778	1
AGCTTATTAGACTGATGTTGAC_hsa-mir-21	5	26	4	22	27	15	25	11	8	32	31	33	9	7	28	33	21	18	7	21	2	9	20	11	28	20	4	16	15	16	8	26	19	12	12	16	617	17.1389	0
AGCTTGTCAGACTGATGTTGAC_hsa-mir-21	7	34	14	36	50	28	48	18	21	33	54	71	9	24	63	36	39	47	7	33	6	16	37	27	56	33	17	29	17	33	25	64	41	22	47	28	1170	32.5	1
AGGAAGACTAGTGATTTTGTT_hsa-mir-7-1	8	15	11	28	19	15	29	23	9	14	26	31	6	21	17	26	18	18	8	10	8	9	18	14	21	12	11	17	12	33	8	20	23	8	20	13	599	16.6389	0
AGGAAGACTAGTGATTTTGTTG_hsa-mir-7-1	40	77	46	65	73	88	107	95	57	74	135	183	20	79	89	50	55	73	49	95	45	62	34	57	93	68	47	66	60	105	36	87	140	40	88	53	2631	73.0833	1
AGGAAGACTAGTGATTTTGTTGC_hsa-mir-7-1	11	14	10	31	22	33	48	49	24	16	41	28	21	46	12	13	31	13	12	20	20	21	31	26	24	19	12	31	27	48	26	17	82	21	31	39	970	26.9444	1
AGGAAGACTAGTGATTTTGTTGT_hsa-mir-7-1	73	117	95	108	147	174	205	197	99	78	169	331	55	148	142	96	106	97	68	139	76	97	103	119	125	84	60	109	103	188	87	125	286	94	96	93	4489	124.694	1
AGGAAGACTAGTGATTTTGTTGTA_hsa-mir-7-1	8	25	21	60	12	64	77	67	33	15	37	66	17	53	20	13	56	7	19	7	26	12	32	30	23	15	9	48	36	63	33	24	99	44	11	20	1202	33.3889	1
AGGAAGACTAGTGATTTTGTTGTC_hsa-mir-7-1	107	163	127	778	191	459	819	666	460	189	450	354	229	467	206	173	588	194	204	163	298	94	379	331	300	179	122	569	389	656	288	307	677	322	310	331	12539	348.306	1
AGGAAGACTAGTGATTTTGTTGTG_hsa-mir-7-1	3	31	13	31	6	25	26	16	137	6	13	23	11	171	9	3	166	6	9	5	90	6	15	15	37	8	4	25	16	34	8	11	31	32	8	27	1077	29.9167	1
AGGAAGACTAGTGATTTTGTTGTT_hsa-mir-7-1	767	1489	932	2035	1761	2109	2923	2104	1779	1371	2684	3157	734	1953	1887	1483	1809	1310	1153	1438	1028	908	1301	1296	1761	1403	775	1911	1477	2588	1000	1755	2667	1236	1818	1263	59065	1640.69	1
AGGAAGACTAGTGATTTTGTTGTTA_hsa-mir-7-1	28	65	38	15	44	44	33	58	33	30	71	132	9	35	37	21	24	27	25	56	9	40	18	28	33	20	22	23	25	53	21	33	99	37	22	14	1322	36.7222	1
AGGAGCTCACAGTCTATTG_ssc-miR-28-5p	15	32	16	13	14	16	18	23	12	25	29	39	5	5	38	20	17	31	11	18	8	7	10	14	21	24	11	19	8	15	9	24	19	6	24	4	620	17.2222	0
AGGAGCTCACAGTCTATTGAG_ssc-miR-28-5p	49	58	54	54	66	46	45	45	36	60	89	146	11	27	84	40	24	76	37	75	21	41	19	61	63	47	21	55	33	61	14	72	77	22	61	29	1819	50.5278	1
AGGAGCTCACAGTCTATTGAGA_ssc-miR-28-5p	13	28	12	6	26	24	9	27	10	12	29	56	2	8	27	14	8	13	11	29	1	12	14	13	10	14	7	16	3	12	2	22	17	6	15	9	537	14.9167	0
AGGCAAGATGCTGGCATAGCTG_ssc-miR-31	0	59	14	5	16	13	18	10	8	9	37	48	0	2	1	2	3	5	0	25	0	9	8	12	16	9	3	1	9	6	8	7	60	5	4	18	450	12.5	0
AGGCAAGATGCTGGCATAGCTGT_ssc-miR-31	1	84	20	7	15	24	20	16	7	5	43	74	5	17	0	0	14	9	2	34	7	20	10	20	13	9	4	4	4	17	12	6	182	16	3	29	753	20.9167	1
AGGCAGTGTAATTAGCTGATTG_bta-miR-34b	1	10	5	8	5	3	49	17	8	6	50	85	0	2	5	3	10	2	0	39	3	2	2	0	26	9	1	4	18	16	2	7	46	9	0	1	454	12.6111	0
AGGCAGTGTAATTAGCTGATTGT_bta-miR-34b	0	10	11	17	3	5	73	20	13	11	44	58	3	2	2	8	13	1	1	35	3	0	2	2	51	6	2	5	13	36	3	5	56	9	0	1	524	14.5556	0
AGGCAGTGTAGTTAGC_ssc-miR-34c	0	6	2	32	9	3	194	10	18	58	84	20	6	7	14	13	28	3	2	21	6	0	3	1	147	71	7	11	38	53	9	16	21	10	7	3	933	25.9167	1
AGGCAGTGTAGTTAGCTGA_ssc-miR-34c	2	17	20	48	17	10	303	24	19	37	159	142	37	26	33	48	54	43	2	71	18	3	7	14	254	115	9	9	31	61	58	29	83	16	36	29	1884	52.3333	1
AGGCAGTGTAGTTAGCTGAC_ssc-miR-34c	1	3	7	32	2	3	162	21	8	11	49	17	5	8	3	2	26	5	0	11	7	1	7	6	38	14	2	14	22	38	5	6	43	12	0	2	593	16.4722	0
AGGCAGTGTAGTTAGCTGAT_ssc-miR-34c	2	69	30	84	49	29	539	54	39	64	245	201	29	22	37	41	100	18	3	129	19	9	15	8	240	111	15	34	95	129	37	52	181	52	17	22	2820	78.3333	1
AGGCAGTGTAGTTAGCTGATA_ssc-miR-34c	0	7	2	13	3	6	75	7	2	6	30	26	3	4	5	6	24	1	0	15	0	0	2	4	44	8	0	5	5	17	10	3	27	14	3	2	379	10.5278	0
AGGCAGTGTAGTTAGCTGATC_ssc-miR-34c	2	50	14	165	11	36	1225	112	93	47	262	90	51	49	30	23	240	17	3	74	27	10	43	37	285	79	11	38	98	223	80	47	295	90	13	44	4014	111.5	1
AGGCAGTGTAGTTAGCTGATT_ssc-miR-34c	36	401	181	643	278	196	5105	471	417	539	1932	1603	273	245	375	344	969	208	30	1055	108	95	159	125	2597	1021	113	244	549	1042	339	386	1272	458	132	168	24109	669.694	1
AGGCAGTGTAGTTAGCTGATTA_ssc-miR-34c	2	24	4	32	4	13	197	26	26	6	55	45	6	7	6	5	37	1	0	12	6	1	3	7	71	9	3	12	38	46	9	9	90	29	2	5	848	23.5556	1
AGGCAGTGTAGTTAGCTGATTG_ssc-miR-34c	28	528	202	518	297	153	3091	489	395	665	2084	1648	105	130	314	249	705	125	17	1123	144	84	102	77	2212	774	124	206	635	1011	110	276	1304	372	91	61	20449	568.028	1
AGGCAGTGTAGTTAGCTGATTGA_ssc-miR-34c	3	127	32	104	33	30	566	83	54	59	275	312	27	21	23	13	106	6	5	158	18	9	19	12	274	72	22	23	100	200	33	41	281	97	6	9	3253	90.3611	1
AGGCAGTGTAGTTAGCTGATTGC_ssc-miR-34c	65	1315	474	1146	482	225	7083	857	842	1714	3937	2944	226	310	751	613	1441	217	55	2165	311	158	142	132	4580	1771	250	374	1354	2123	229	643	2504	747	251	161	42592	1183.11	1
AGGCAGTGTAGTTAGCTGATTGCA_ssc-miR-34c	2	76	36	34	15	12	169	33	38	61	159	191	6	11	28	8	29	2	2	114	10	10	5	5	100	34	11	14	51	77	8	18	99	38	8	1	1515	42.0833	1
AGGCAGTGTAGTTAGCTGATTGCT_ssc-miR-34c	0	17	4	16	5	2	109	12	11	9	47	65	4	6	4	6	14	0	1	35	7	1	1	2	50	8	3	5	14	27	4	6	54	9	2	0	560	15.5556	0
AGGCAGTGTAGTTAGCTGATTGT_ssc-miR-34c	16	246	82	605	59	115	3852	404	307	226	975	494	84	136	100	78	657	27	12	301	110	27	86	76	1048	265	43	191	577	934	146	135	1187	430	30	68	14129	392.472	1
AGGCAGTGTATTGTTAGCTGGC_bta-miR-449b	0	4	5	9	15	5	52	14	6	13	29	22	1	2	6	8	13	3	0	10	2	8	3	2	26	14	3	6	23	29	6	7	74	22	3	2	447	12.4167	0
AGGCAGTGTATTGTTAGCTGGT_bta-miR-449b	0	8	5	9	8	10	63	22	18	9	34	37	3	7	8	1	22	4	0	14	4	2	3	7	26	3	1	5	17	51	4	5	152	30	2	2	596	16.5556	0
AGGCGGAGACTTGGGCAATTGC_hsa-miR-25-5p	18	18	29	21	17	12	18	20	18	22	28	27	4	14	21	5	12	10	23	24	21	9	4	7	15	14	9	13	18	14	3	22	35	9	16	6	576	16	0
AGGCGGAGACTTGGGCAATTGCC_hsa-miR-25-5p	29	5	12	34	10	25	25	46	21	11	26	16	15	13	7	2	10	9	16	2	17	9	14	21	13	4	7	18	17	16	16	17	34	19	10	7	573	15.9167	0
AGGCGGAGACTTGGGCAATTGCT_hsa-miR-25-5p	96	91	76	65	70	121	91	142	91	30	111	152	26	74	81	42	44	49	43	84	40	43	43	65	62	23	44	63	74	62	57	85	144	49	32	29	2494	69.2778	1
AGGCTTATCAGACTGATGTTGAC_hsa-mir-21	11	34	16	51	49	31	51	30	18	56	66	75	20	15	50	87	43	73	27	30	7	22	52	29	76	63	26	40	36	42	37	90	43	22	61	32	1511	41.9722	1
AGGGACGGGACGCGGTGCAGTGTT_ssc-miR-92b-5p	8	15	11	6	11	14	42	19	10	10	16	14	3	8	10	3	8	4	29	14	5	10	6	14	25	7	2	14	11	19	5	12	16	4	4	5	414	11.5	0
AGGGACTTTCAGGGGCAGCTGTG_ssc-miR-365-5p	39	49	24	24	11	14	52	44	31	23	41	65	14	19	79	20	31	18	73	21	31	10	14	13	31	25	17	33	22	31	21	41	50	13	25	19	1088	30.2222	1
AGGGGCTGGCTTTCCTCTGGT_hsa-miR-185-3p	15	25	14	25	28	50	37	47	42	14	59	42	24	36	53	31	24	32	18	11	17	12	30	29	28	17	13	17	20	27	26	45	24	14	28	20	994	27.6111	1
AGGGTCGGGCCTGGT_hsa-mir-7641-2	10	29	7	25	12	11	37	5	12	36	27	10	23	51	28	9	26	20	39	7	22	10	26	18	34	32	7	22	15	26	36	21	19	10	36	18	776	21.5556	1
AGGGTCGGGCCTGGTT_hsa-mir-7641-2	7	14	9	22	23	19	54	11	14	31	28	10	15	22	34	8	40	25	15	3	19	12	22	18	51	27	4	19	20	48	16	15	26	18	40	23	782	21.7222	1
AGGGTCGGGCCTGGTTAGT_hsa-mir-7641-2	23	20	7	20	24	33	46	35	20	36	32	11	17	37	37	12	29	16	32	14	28	15	25	24	45	36	15	54	30	36	21	27	44	16	38	24	979	27.1944	1
AGGGTCGGGCCTGGTTAGTACTT_hsa-mir-7641-2	5	24	20	7	15	20	9	33	17	24	28	16	7	34	38	8	20	6	35	13	30	8	7	18	18	15	9	23	15	35	5	23	21	10	14	18	648	18	0
AGGGTCGGGCCTGGTTAGTACTTGGATGG_hsa-mir-7641-2	17	11	6	7	5	13	12	11	11	36	17	5	5	18	39	7	17	7	69	9	23	8	2	9	16	45	6	25	10	12	1	16	13	5	29	6	548	15.2222	0
AGGGTTGGGCGGAGGCTTTC_ssc-miR-296-3p	21	27	25	22	7	10	18	22	7	13	30	28	7	9	23	9	14	17	20	17	14	4	8	16	26	19	5	9	16	17	11	22	28	5	19	11	576	16	0
AGGGTTGGGCGGAGGCTTTCA_ssc-miR-296-3p	3	24	14	24	1	16	37	27	11	17	21	19	3	8	18	5	14	6	9	12	6	3	5	15	21	9	4	18	20	17	11	11	29	12	7	8	485	13.4722	0
AGGGTTGGGCGGAGGCTTTCC_ssc-miR-296-3p	223	404	287	386	217	161	474	310	288	411	540	480	134	233	536	280	239	376	327	283	258	160	157	234	491	407	183	306	297	338	149	421	434	99	450	167	11140	309.444	1
AGGGTTGGGCGGAGGCTTTCCA_ssc-miR-296-3p	16	26	21	44	14	39	32	46	21	10	38	57	11	25	24	16	32	25	11	23	18	11	23	17	28	10	7	34	33	23	32	28	54	7	16	20	892	24.7778	1
AGGGTTGGGCGGAGGCTTTCCC_ssc-miR-296-3p	24	62	41	136	39	98	126	136	89	48	142	88	64	77	49	64	92	82	31	61	43	28	71	93	96	52	44	131	81	111	92	121	143	41	73	69	2838	78.8333	1
AGGGTTGGGCGGAGGCTTTCCG_ssc-miR-296-3p	2	8	6	13	3	14	9	17	52	4	8	11	6	58	5	3	71	2	3	4	33	1	5	6	16	4	3	9	4	3	15	4	20	6	3	7	438	12.1667	0
AGGGTTGGGCGGAGGCTTTCCT_ssc-miR-296-3p	165	331	207	372	280	405	397	473	342	231	574	702	236	310	390	291	344	401	146	306	144	157	258	383	368	222	202	410	304	389	301	422	564	130	368	269	11794	327.611	1
AGGGTTGGGCGGAGGCTTTCT_ssc-miR-296-3p	23	39	25	118	16	62	165	79	86	32	82	60	44	79	44	20	93	35	43	21	70	7	59	73	63	34	19	89	89	81	66	59	108	37	27	53	2100	58.3333	1
AGGTAGTTTCATGTTGTTGGG_ssc-miR-196a	14	14	26	15	28	33	18	27	23	4	20	27	2	15	14	14	6	16	13	39	13	22	6	13	18	14	29	24	10	15	9	14	9	10	18	7	599	16.6389	0
AGGTTGGGATCGGTTGCAATGC_hsa-miR-92a-1-5p	10	25	20	25	15	15	14	21	13	23	14	36	5	9	37	11	9	6	14	25	17	15	6	6	23	26	8	13	8	24	10	22	31	8	21	12	597	16.5833	0
AGGTTGGGATCGGTTGCAATGCA_hsa-miR-92a-1-5p	5	7	4	14	5	23	26	33	10	6	11	19	7	23	6	1	10	3	5	0	7	5	4	17	10	0	1	21	7	9	17	11	32	4	2	11	376	10.4444	0
AGGTTGGGATCGGTTGCAATGCC_hsa-miR-92a-1-5p	41	30	24	87	49	89	74	132	76	30	97	65	35	77	78	15	53	28	42	32	35	25	41	67	41	25	18	101	38	51	59	73	96	30	33	37	1924	53.4444	1
AGGTTGGGATCGGTTGCAATGCT_hsa-miR-92a-1-5p	230	216	126	229	312	348	321	405	316	132	420	569	95	265	427	96	172	165	196	182	153	178	119	253	174	170	97	306	162	224	140	332	434	117	153	143	8377	232.694	1
AGTAAGTGCTTCCATGTTTTAG_bta-miR-302d	11	25	9	6	21	14	7	9	19	5	23	29	4	9	25	12	4	5	4	14	4	6	10	10	15	2	6	3	6	9	5	17	15	2	9	2	376	10.4444	0
AGTACTTGGATGGGA_hsa-mir-7641-2	176	71	138	98	123	99	107	108	88	235	209	50	55	111	241	80	96	98	214	79	121	54	94	131	183	224	56	161	64	160	40	160	139	44	177	55	4339	120.528	1
AGTACTTGGATGGGAG_hsa-mir-7641-2	121	31	57	33	42	27	16	37	24	48	103	30	6	38	57	7	15	29	49	21	36	35	16	35	32	24	17	25	8	20	8	43	61	12	12	21	1196	33.2222	1
AGTAGTGGGATCGCG_ssc-mir-1285	9	1	8	25	16	11	13	12	5	3	133	3	3	5	5	18	5	5	7	4	7	9	10	7	5	2	1	6	1	9	7	84	20	5	7	4	475	13.1944	0
AGTAGTGGGATCGCGCCTG_ssc-mir-1285	20	3	16	51	34	22	53	10	16	11	141	2	12	25	11	24	27	21	39	12	38	11	30	5	29	6	16	43	12	13	16	125	24	10	22	6	956	26.5556	1
AGTAGTGGGATCGCGCCTGT_ssc-mir-1285	12	9	15	27	36	26	33	16	14	2	115	3	6	18	5	15	10	16	14	8	27	14	37	4	7	0	8	21	17	23	16	75	53	25	10	8	745	20.6944	1
AGTAGTGGGATCGCGCCTGTG_ssc-mir-1285	227	59	106	163	276	175	329	96	141	67	592	15	116	213	157	173	143	222	249	102	362	60	291	33	196	37	140	288	68	219	114	469	173	76	240	79	6466	179.611	1
AGTAGTGGGATCGCGCCTGTGAAT_ssc-mir-1285	2	0	5	29	12	18	11	0	2	2	98	1	2	1	0	13	5	1	4	1	2	2	6	0	0	0	3	11	1	3	5	54	26	7	1	0	328	9.11111	0
AGTAGTGGGATCGCGCCTGTGAATAGC_ssc-mir-1285	6	3	23	106	96	53	41	1	7	0	646	0	2	0	4	100	11	3	10	2	11	39	20	0	5	1	12	26	4	15	4	403	85	29	19	8	1795	49.8611	1
AGTAGTGGGATCGCGCCTGTGAATAGCC_ssc-mir-1285	35	8	188	693	656	382	220	13	14	6	4068	7	15	19	27	541	68	17	27	18	51	188	145	3	25	5	38	137	8	91	50	2333	505	226	78	18	10923	303.417	1
AGTAGTGGGATCGCGCCTGTGAATAGCCA_ssc-mir-1285	1	0	12	29	38	35	9	2	1	0	164	1	1	4	6	24	10	4	3	1	7	16	4	0	2	0	5	5	1	3	7	114	45	10	8	4	576	16	0
AGTAGTGGGATCGCGCCTGTGAATAGCCACT_ssc-mir-1285	1	2	2	31	19	10	21	4	4	2	54	2	8	4	6	14	8	6	3	2	10	14	23	0	2	2	6	16	8	10	9	41	13	7	9	4	377	10.4722	0
AGTAGTGGGATCGCGCCTGTGAATAGCCACTGTACTCCAGC_ssc-mir-1285	1	0	2	63	36	27	6	0	1	3	207	0	4	0	1	40	5	1	1	0	2	14	11	0	3	0	3	9	0	8	4	230	22	11	4	1	720	20	1
AGTAGTGGGATCGCGCCTGTGAATAGCCACTGTACTCCAGCC_ssc-mir-1285	0	1	25	129	89	45	24	1	0	1	583	0	0	0	0	126	10	1	0	0	3	27	22	0	2	1	5	19	0	19	8	558	74	28	14	1	1816	50.4444	1
AGTAGTGGGATCGCGCCTGTGAATAGCCACTGTACTCCAGCCT_ssc-mir-1285	0	0	19	172	69	63	32	1	0	0	478	2	0	0	2	78	18	1	1	0	3	21	45	0	1	1	3	22	1	17	8	480	87	68	12	0	1705	47.3611	1
AGTGCCGCCATTTTTTG_ssc-mir-371	0	35	28	0	42	0	0	26	0	21	0	1	1	24	0	0	12	22	4	0	0	22	12	29	13	0	0	24	43	36	9	17	0	22	1	11	455	12.6389	0
AGTGCCGCCATTTTTTGAGT_ssc-mir-371	0	8	19	0	28	0	0	22	1	8	0	0	0	22	0	0	15	10	4	0	0	17	23	26	10	2	0	19	44	34	17	28	0	19	1	15	392	10.8889	0
AGTGCCGCCATTTTTTGAGTG_ssc-mir-371	0	64	34	2	74	0	1	49	0	14	1	0	0	34	0	0	26	20	3	0	0	41	22	43	22	0	0	20	53	50	16	42	1	29	0	10	671	18.6389	0
AGTGCCGCCATTTTTTGAGTGT_ssc-mir-371	1	253	233	1	537	7	6	424	2	132	3	5	5	304	4	3	172	178	52	3	1	295	394	433	157	1	1	201	538	433	177	340	4	352	1	255	5908	164.111	1
AGTGCTTCCATGTTTCAGTGG_bta-miR-302c	24	27	34	12	27	34	35	45	17	15	47	114	12	24	41	34	19	62	9	61	8	20	25	42	20	20	16	10	24	25	14	77	60	22	30	17	1123	31.1944	1
AGTGCTTCCATGTTTCAGTGGC_bta-miR-302c	2	8	2	5	15	24	14	21	11	5	13	11	10	16	24	16	5	5	2	4	3	7	33	14	9	4	5	11	22	24	19	26	16	5	11	12	434	12.0556	0
AGTGCTTCCATGTTTCAGTGGT_bta-miR-302c	9	42	31	28	88	100	42	58	38	25	70	119	42	54	103	89	26	53	23	45	7	42	74	83	65	33	13	40	67	61	56	104	57	23	67	66	1943	53.9722	1
AGTGCTTCCATGTTTTAGT_bta-miR-302d	20	42	32	22	40	53	49	47	30	22	55	122	21	37	58	46	23	44	18	41	7	26	27	42	29	25	22	39	26	54	25	67	57	19	39	32	1358	37.7222	1
AGTGCTTCCATGTTTTAGTAG_bta-miR-302b	99	158	132	89	184	154	100	179	104	89	233	397	40	100	230	121	62	150	76	228	49	128	66	135	134	99	76	84	77	116	66	261	177	61	131	85	4670	129.722	1
AGTGCTTCCATGTTTTAGTAGA_bta-miR-302b	44	116	59	48	133	69	69	91	60	79	126	235	36	70	171	105	19	90	47	93	26	48	42	67	66	52	53	52	54	64	33	165	55	27	125	51	2740	76.1111	1
AGTGCTTCCATGTTTTAGTGA_bta-miR-302a	30	95	55	49	97	86	58	61	56	45	89	239	32	42	110	84	23	70	19	64	17	42	45	38	64	44	37	32	59	74	35	107	57	19	64	49	2187	60.75	1
AGTGCTTCCATGTTTTAGTGT_bta-miR-302a	18	44	35	18	30	50	39	43	31	17	41	69	22	38	49	27	16	20	15	28	12	17	26	37	24	24	13	15	19	40	24	29	35	9	34	20	1028	28.5556	1
AGTGGGATCGCGCCTGTG_ssc-mir-1285	25	14	15	82	47	42	39	21	40	30	84	6	20	48	40	23	17	34	33	13	54	6	44	6	49	7	25	37	18	42	17	56	15	6	35	14	1104	30.6667	1
AGTGGGATCGCGCCTGTGAATAGCC_ssc-mir-1285	8	0	7	29	26	6	12	4	5	0	64	1	2	9	5	6	4	10	7	4	17	11	8	0	2	1	6	10	0	5	2	32	6	2	5	3	319	8.86111	0
AGTGGTTTTACCCTATGGTAG_ssc-miR-140-5p	21	45	26	21	61	67	24	30	18	26	72	101	5	22	32	18	21	52	6	68	8	51	12	55	30	22	16	35	28	44	24	50	60	13	30	27	1241	34.4722	1
AGTTCTTCAGTGGCAAGCTTT_ssc-miR-22-5p	16	63	39	32	72	101	60	55	30	29	68	170	24	43	34	23	36	52	13	61	14	53	52	59	44	34	15	38	39	60	37	59	116	31	32	45	1749	48.5833	1
AGTTCTTCAGTGGCAAGCTTTA_ssc-miR-22-5p	13	43	22	7	22	39	12	27	9	2	29	84	5	13	8	4	12	11	1	30	6	22	10	18	11	1	9	8	17	25	8	21	64	10	6	9	638	17.7222	0
ATACAGTACTGTGATAACTGAA_ssc-miR-101	23	64	34	23	60	53	37	42	25	22	59	109	8	28	54	48	31	59	17	54	11	32	28	53	44	23	23	33	30	54	16	42	51	18	39	26	1373	38.1389	1
ATACCCTGTAGATCCGAATTTGT_ssc-miR-10a-5p	1	75	12	27	25	29	119	15	22	29	62	37	22	32	14	10	57	22	4	20	10	15	15	24	53	50	7	6	36	40	30	17	105	25	11	51	1129	31.3611	1
ATACTGCCTGGTAATGATGAC_hsa-miR-200b-3p	7	67	19	49	44	52	72	21	25	44	66	86	27	34	55	59	53	34	15	50	13	28	25	29	54	59	16	27	16	39	27	77	66	26	40	21	1442	40.0556	1
ATACTGCCTGGTAATGATGACG_hsa-mir-200b	4	25	9	14	15	24	24	7	18	21	32	25	14	34	21	24	54	6	6	13	15	1	11	4	22	27	8	10	3	7	8	30	30	8	26	7	607	16.8611	0
ATACTGTAAACGCTTTCTGATG_hsa-miR-3607-3p	6	17	4	2	25	11	2	28	3	7	16	15	3	1	4	5	2	9	1	15	7	9	5	5	3	2	4	5	3	5	1	8	16	3	8	3	263	7.30556	0
ATAGCCACTGTACTCCAGCCTGGGCAACATAGCGAGACCCCGTCTCT_ssc-miR-1285	4	7	2	22	17	29	6	3	7	3	34	4	8	4	2	9	7	19	1	8	8	5	27	1	10	1	7	8	11	14	14	32	19	12	7	9	381	10.5833	0
ATAGCCACTGTACTCCAGCCTGGGCAACATAGCGAGACCCCGTCTCTA_ssc-miR-1285	32	14	22	47	62	40	18	12	17	8	80	16	14	12	8	31	10	35	27	23	15	23	49	7	21	8	48	42	20	24	34	96	49	33	40	22	1059	29.4167	1
ATAGCCACTGTACTCCAGCCTGGGCAACATAGCGAGACCCCGTCTCTC_ssc-miR-1285	8	2	5	30	5	28	19	9	17	1	17	2	26	9	6	11	20	32	21	0	20	2	58	5	17	0	7	18	19	18	28	24	27	18	13	34	576	16	0
ATAGCCACTGTACTCCAGCCTGGGCAACATAGCGAGACCCCGTCTCTT_ssc-miR-1285	60	38	31	95	79	98	57	63	73	18	117	18	86	73	37	65	64	233	109	51	69	40	192	9	82	12	90	145	77	79	89	157	75	98	79	115	2873	79.8056	1
ATAGCCACTGTACTCCAGCCTGGGCAACATAGCGAGACCCCGTCTCTTA_ssc-miR-1285	33	5	19	16	39	36	18	11	9	4	37	10	14	14	3	16	6	66	18	18	12	19	25	3	19	2	32	19	22	12	24	73	32	20	14	20	740	20.5556	1
ATAGCCAGTTTGGGAAGAATG_ssc-mir-7857	13	55	45	12	25	31	42	30	17	30	44	112	7	7	24	12	15	22	5	82	17	28	12	19	45	12	11	9	37	67	9	20	63	17	10	12	1018	28.2778	1
ATAGCCAGTTTGGGAAGAATGC_ssc-mir-7857	58	74	64	20	75	98	29	84	28	31	91	217	7	24	39	13	28	27	16	116	7	83	20	62	45	16	20	30	26	68	21	46	176	35	27	26	1847	51.3056	1
ATAGCCAGTTTGGGAAGAATGCTG_ssc-mir-7857	17	19	18	14	27	25	31	29	23	27	29	26	2	24	24	14	19	29	11	34	13	19	7	18	48	24	9	12	19	20	6	15	23	14	30	14	733	20.3611	1
ATAGCCAGTTTGGGAAGAATGCTGT_ssc-mir-7857	12	14	6	9	18	16	10	26	15	8	16	20	3	5	7	8	4	7	6	18	7	9	9	11	10	3	8	11	9	14	8	7	29	13	7	4	387	10.75	0
ATAGCTTATCAGACTGATGTTGAC_ssc-miR-21	4	12	4	13	21	13	19	15	2	11	27	26	10	11	12	21	12	22	5	19	5	15	9	11	14	14	5	11	11	15	8	18	16	7	7	10	455	12.6389	0
ATATAATACAACCTGCTAAGT_ssc-miR-374b-5p	11	32	16	15	28	29	27	26	13	5	22	49	6	10	8	11	8	11	2	24	5	13	7	26	22	9	1	11	11	22	9	8	42	12	6	12	569	15.8056	0
ATATAATACAACCTGCTAAGTA_ssc-miR-374b-5p	10	47	21	27	25	79	21	62	18	7	39	113	12	24	12	8	18	6	5	22	18	16	24	29	13	11	9	19	21	41	14	26	85	20	6	11	939	26.0833	1
ATATAATACAACCTGCTAAGTG_ssc-miR-374b-5p	276	605	490	201	951	752	338	543	322	307	855	1811	134	344	512	417	150	433	77	615	156	373	262	395	404	224	222	193	232	412	179	435	624	217	233	216	14910	414.167	1
ATATATTAAATGGATTTTTGGAGCC_bta-miR-1246	26	16	4	2	6	22	7	29	12	16	17	3	18	28	6	1	20	4	10	5	28	2	26	7	9	3	3	10	16	14	9	8	13	23	3	9	435	12.0833	0
ATATATTAAATGGATTTTTGGAGCT_bta-miR-1246	156	45	39	18	50	100	25	116	52	77	51	22	50	89	24	6	29	15	28	30	82	15	81	35	45	13	20	47	48	49	33	31	46	72	23	20	1682	46.7222	1
ATATATTAAATGGATTTTTGGAGT_bta-miR-1246	19	22	9	13	12	36	19	72	29	11	15	10	14	61	11	2	33	2	15	4	34	2	39	30	21	11	4	42	18	23	14	15	17	32	14	15	740	20.5556	1
ATATCAGACTGATGTTGAC_hsa-mir-21	6	8	4	50	27	15	78	15	15	54	54	8	13	25	74	52	40	35	16	8	14	3	29	24	63	59	12	34	22	31	9	41	12	10	58	22	1040	28.8889	1
ATCAACAGACATTAATTGGGC_ssc-miR-421-3p	8	16	13	7	17	8	7	11	4	12	17	22	0	7	7	1	8	4	3	14	5	5	5	2	7	2	7	4	9	27	2	7	17	1	3	1	290	8.05556	0
ATCAACAGACATTAATTGGGCG_ssc-miR-421-3p	8	42	32	12	23	26	25	22	14	25	35	55	2	18	27	11	8	13	10	27	15	9	1	12	25	7	4	9	13	30	9	13	28	7	12	10	639	17.75	0
ATCAACAGACATTAATTGGGCGC_ssc-miR-421-3p	124	130	142	38	160	148	61	183	82	40	209	392	23	56	96	46	26	66	30	169	42	102	31	77	56	32	32	57	45	87	38	75	212	33	49	38	3227	89.6389	1
ATCAACAGACATTAATTGGGCGT_ssc-miR-421-3p	16	36	31	29	16	79	37	75	34	17	41	74	13	25	10	10	28	9	9	20	20	15	21	27	13	5	8	34	20	45	28	17	126	37	8	26	1059	29.4167	1
ATCACATTGCCAGGGATT_ssc-miR-23b	1	5	11	3	10	23	17	9	11	7	21	74	7	16	3	2	5	9	0	8	4	10	9	12	5	2	4	1	1	30	18	4	42	9	13	38	444	12.3333	0
ATCACATTGCCAGGGATTACC_ssc-miR-23b	3	95	25	4	47	48	43	29	11	12	101	205	17	26	22	11	15	9	5	73	4	46	11	27	31	12	7	8	30	73	29	14	122	39	14	51	1319	36.6389	1
ATCACATTGCCAGGGATTACCA_ssc-miR-23b	1	69	8	3	32	16	18	11	6	6	27	106	7	7	6	0	5	0	0	33	5	11	1	8	25	3	1	4	6	16	10	4	52	13	3	20	543	15.0833	0
ATCACATTGCCAGGGATTACCAC_ssc-miR-23b	2	62	16	0	30	24	16	28	11	9	39	94	4	9	12	5	9	6	0	37	2	22	7	10	13	6	4	4	12	24	12	5	77	18	10	10	649	18.0278	0
ATCACATTGCCAGGGATTACCACC_ssc-miR-23b	2	39	6	13	7	21	42	17	5	1	19	25	19	22	2	3	19	1	0	11	3	6	4	5	15	2	2	2	9	30	12	10	63	14	4	31	486	13.5	0
ATCACATTGCCAGGGATTACCACT_ssc-miR-23b	8	253	46	32	62	74	137	59	47	21	129	181	33	61	16	9	44	26	5	73	16	40	26	51	84	29	13	21	34	75	70	34	246	67	17	95	2234	62.0556	1
ATCACATTGCCAGGGATTACT_ssc-miR-23b	2	23	1	3	2	17	34	19	1	2	21	26	8	19	0	1	12	0	0	6	1	6	4	5	12	3	1	3	3	19	16	3	49	20	3	16	361	10.0278	0
ATCACATTGCCAGGGATTTC_ssc-miR-23a	0	19	5	0	17	19	18	6	10	3	40	57	2	11	3	0	4	3	0	18	0	19	6	10	10	1	2	0	8	32	12	2	41	14	2	18	412	11.4444	0
ATCACATTGCCAGGGATTTCC_ssc-miR-23a	1	77	25	4	25	41	72	45	11	20	132	230	13	19	15	7	25	19	0	76	8	38	13	10	64	15	4	5	18	48	23	21	147	38	15	44	1368	38	1
ATCACATTGCCAGGGATTTCCA_ssc-miR-23a	1	41	11	3	9	16	15	28	3	4	58	139	7	9	12	5	7	3	2	33	2	17	1	5	23	3	6	1	6	26	11	5	54	16	3	8	593	16.4722	0
ATCACATTGCCAGGGATTTCT_ssc-miR-23a	0	14	0	7	4	14	27	12	6	2	22	33	5	10	0	1	8	1	1	7	1	5	2	5	12	1	1	3	10	15	14	1	38	16	3	19	320	8.88889	0
ATCACTAACCACACGGCCAG_hsa-miR-34c-3p	0	25	6	4	6	2	44	11	14	9	35	52	4	10	10	2	19	1	0	22	5	4	0	1	33	5	5	1	5	16	1	0	23	3	4	0	382	10.6111	0
ATCACTAACCACACGGCCAGA_hsa-miR-34c-3p	0	19	4	7	1	3	48	8	10	5	32	38	1	1	5	3	7	0	0	16	2	0	3	0	23	4	1	4	7	14	3	0	26	17	1	1	314	8.72222	0
ATCACTAACCACACGGCCAGG_hsa-miR-34c-3p	5	166	43	45	66	25	455	119	85	108	405	477	36	61	76	50	108	18	1	164	28	30	20	11	364	100	29	25	116	199	32	66	222	82	40	15	3892	108.111	1
ATCACTAACCACACGGCCAGGT_hsa-miR-34c-3p	1	22	2	9	2	2	43	8	6	15	22	57	2	9	5	1	5	3	0	26	3	3	3	1	26	7	0	0	9	15	4	4	23	9	1	5	353	9.80556	0
ATCACTAATTCCACTGCCATC_ENSSSCG00000027451	6	155	39	50	51	21	458	117	69	98	323	555	16	40	78	49	73	9	0	228	21	22	17	10	301	92	25	29	150	208	29	70	311	84	22	15	3841	106.694	1
ATCACTAATTCCACTGCCATCA_ENSSSCG00000027451	3	70	25	16	20	4	147	21	18	19	107	227	8	6	23	8	18	4	0	60	5	13	0	3	66	25	9	10	48	46	7	24	90	22	10	5	1187	32.9722	1
ATCAGACTGATGTTGAC_ssc-miR-21	55	107	68	553	416	175	1050	118	212	735	653	94	248	361	770	723	566	584	264	137	192	65	386	228	963	996	197	401	292	495	190	789	89	131	922	271	14496	402.667	1
ATCAGACTGATGTTGACA_bta-miR-21-5p	3	13	9	46	46	13	105	16	14	71	74	4	18	24	65	52	52	34	31	15	16	9	32	20	71	88	25	34	34	45	21	54	11	12	55	25	1257	34.9167	1
ATCAGACTGATGTTGACC_bta-miR-21-5p	1	3	2	31	13	6	50	8	10	15	13	0	17	11	17	11	21	19	8	2	13	3	16	9	20	19	5	10	13	17	12	16	3	12	30	9	465	12.9167	0
ATCAGACTGATGTTGACT_bta-miR-21-5p	1	12	5	55	20	16	90	11	19	34	34	6	27	30	39	29	47	29	10	15	16	4	32	16	60	61	11	30	25	30	23	46	10	13	54	22	982	27.2778	1
ATCAGACTGATGTTGAT_ssc-miR-21	1	14	5	102	18	38	197	22	30	30	47	4	59	71	30	35	97	15	12	4	31	2	86	44	77	27	9	87	51	88	43	66	21	20	48	53	1584	44	1
ATCCCACTTCTGACACC_bta-miR-2478	47	21	19	13	20	25	22	27	17	13	65	91	9	19	109	9	16	19	63	25	25	26	16	53	16	18	4	9	4	23	13	23	23	6	18	9	935	25.9722	1
ATCCCACTTCTGACACCA_bta-miR-2478	251	193	56	44	231	203	86	135	71	50	497	732	37	55	670	123	38	169	503	130	88	230	73	448	113	53	37	119	34	76	27	202	130	29	113	34	6080	168.889	1
ATCCCAGCGGTGCCTCCA_hsa-miR-5100	25	130	33	32	28	34	79	18	20	12	71	89	17	21	31	11	7	17	78	66	42	37	28	25	52	24	10	11	30	47	13	27	26	4	14	6	1215	33.75	1
ATCCCCGACTGGAAGCT_ssc-miR-30d	3	5	7	86	9	22	101	19	24	69	50	3	21	48	74	48	86	36	46	3	43	7	30	19	88	76	15	59	31	58	22	65	5	14	67	26	1385	38.4722	1
ATCCTTGACTGGAAGCC_ssc-miR-30e-5p	1	1	0	24	5	8	30	3	9	7	15	1	18	9	18	6	11	13	0	2	10	2	9	7	5	9	5	18	8	18	19	18	3	5	9	16	342	9.5	0
ATCCTTGACTGGAAGCT_ssc-miR-30e-5p	5	3	7	79	40	26	78	21	19	38	60	1	29	39	63	38	43	46	22	12	19	6	43	40	51	38	20	58	34	53	27	59	4	10	35	31	1197	33.25	1
ATCGCGCCTGTGAATAGCC_ssc-mir-1285	8	3	5	44	25	16	25	2	8	1	132	0	5	2	4	32	7	2	12	10	10	7	21	0	3	1	6	15	2	18	9	89	12	13	10	2	561	15.5833	0
ATCGCGCCTGTGAATAGCCACT_ssc-mir-1285	12	6	4	41	19	16	21	4	13	1	65	1	4	9	13	17	7	9	7	2	15	8	15	2	7	1	9	15	1	12	9	61	17	14	9	10	476	13.2222	0
ATCGGCGTGGCGTCGGTCGTG_hsa-mir-1307	9	41	15	26	19	15	26	21	21	18	42	67	16	28	39	22	22	21	15	24	18	12	14	12	28	35	17	29	19	42	15	22	33	9	45	10	867	24.0833	1
ATCGGCGTGGCGTCGGTCGTGA_hsa-mir-1307	8	19	7	27	16	12	27	17	14	10	25	26	5	17	19	13	13	4	12	5	9	2	15	10	16	8	7	20	18	17	7	15	24	11	14	18	507	14.0833	0
ATCGGCGTGGCGTCGGTCGTGG_hsa-mir-1307	88	204	90	183	186	131	213	185	182	156	313	323	86	170	257	190	151	172	164	136	172	100	110	118	234	189	101	193	134	152	107	224	132	44	301	99	5990	166.389	1
ATCGGGAATGTCGTGTCCGCCC_ssc-miR-425-3p	18	14	10	13	11	22	22	19	18	12	31	55	4	14	23	29	4	11	8	32	5	9	21	15	25	14	7	18	7	25	10	21	36	2	13	13	611	16.9722	0
ATCTCGGAAGCTAAG_hsa-miR-7641	11	27	19	4	20	4	17	11	23	35	22	18	6	28	40	15	29	9	69	6	24	2	9	10	39	28	14	20	16	22	2	18	3	4	31	3	658	18.2778	0
ATCTCGGAAGCTAAGC_hsa-miR-7641	26	52	38	11	35	36	27	44	16	84	50	26	9	32	81	20	23	18	60	36	42	24	15	43	52	63	17	45	28	46	14	44	26	16	39	22	1260	35	1
ATCTCGGAAGCTAAGCA_hsa-miR-7641	7	9	9	7	10	9	10	5	5	39	16	5	4	16	32	14	14	13	42	10	14	6	8	8	24	27	7	25	5	11	5	22	7	1	26	5	477	13.25	0
ATCTTACCGGACAGTGCTGG_hsa-miR-200a-5p	3	19	13	29	22	24	34	20	25	30	41	40	12	24	41	40	26	33	4	20	12	18	11	21	22	34	11	15	19	26	18	32	46	20	37	11	853	23.6944	1
ATCTTACCGGACAGTGCTGGA_hsa-miR-200a-5p	75	277	85	246	319	289	338	153	188	253	487	836	245	213	630	555	307	251	95	246	60	135	283	181	331	452	135	191	127	222	197	472	374	68	502	114	9932	275.889	1
ATCTTACCGGACAGTGCTGGAA_hsa-miR-200a-5p	4	25	8	27	23	29	44	7	7	19	42	54	27	25	50	58	34	22	3	19	4	8	21	13	50	48	15	9	10	24	20	41	45	8	36	18	897	24.9167	1
ATCTTACCGGACAGTGCTGGAT_hsa-miR-200a-5p	4	19	8	26	29	58	70	10	25	16	59	59	19	29	47	61	50	23	6	25	7	3	42	38	22	46	5	13	8	35	26	55	51	12	37	11	1054	29.2778	1
ATCTTACTGGGCAGCATTGG_hsa-miR-200b-5p	14	34	19	32	29	38	35	21	18	32	65	79	20	57	37	17	35	33	12	55	17	23	20	18	21	33	11	17	15	27	15	46	93	12	49	12	1111	30.8611	1
ATCTTACTGGGCAGCATTGGA_hsa-miR-200b-5p	92	228	80	162	140	180	212	87	122	109	304	363	64	136	279	122	128	131	70	202	54	115	74	83	167	162	45	75	76	98	92	236	382	56	184	72	5182	143.944	1
ATGAATAAAGTCGTGATACTGTAAACGCTTTCTGATG_hsa-miR-3607-3p	21	27	6	27	59	14	36	29	31	89	55	24	13	32	81	95	54	47	76	22	57	14	36	16	52	51	44	74	41	53	17	121	28	8	112	11	1573	43.6944	1
ATGAATAAAGTCGTGATACTGTAAACGCTTTCTGATGTA_hsa-miR-3607-3p	10	12	3	38	35	12	21	18	24	82	50	5	8	14	104	93	49	34	70	16	38	9	36	7	36	42	37	47	30	30	10	88	10	12	109	17	1256	34.8889	1
ATGACACGATCACTCCCGTTGAG_ssc-miR-425-5p	9	25	17	12	17	22	7	16	12	12	35	68	7	23	24	18	7	18	7	20	11	15	9	13	22	10	6	7	13	10	9	20	19	10	26	10	586	16.2778	0
ATGACACGATCACTCCCGTTGAGT_bta-miR-425-5p	13	51	29	46	43	61	44	54	30	36	70	141	19	38	41	42	38	43	13	42	27	30	43	36	38	27	18	42	41	52	33	47	74	39	32	35	1508	41.8889	1
ATGCACCTGGGCAAGGATTCTG_ssc-miR-500	9	17	18	12	32	24	15	23	17	7	27	36	6	7	18	11	11	22	10	26	9	26	19	24	19	15	10	14	12	19	7	13	31	6	22	24	618	17.1667	0
ATGCACCTGGGCAAGGATTCTGA_ssc-miR-500	8	34	33	10	41	50	13	26	17	18	39	93	13	14	11	22	15	11	0	51	2	24	23	26	16	10	14	16	13	37	5	14	63	20	15	8	825	22.9167	1
ATGCCTTGAGTGTAGGACCG_ssc-miR-532-5p	15	31	19	34	37	29	34	18	24	30	63	85	22	16	40	35	28	31	22	38	24	25	13	20	43	44	18	27	15	41	13	56	42	19	40	18	1109	30.8056	1
ATGCCTTGAGTGTAGGACCGC_ssc-miR-532-5p	15	53	33	166	65	120	219	103	75	56	133	83	74	80	62	87	136	60	29	23	65	29	114	85	133	75	45	118	100	131	83	116	194	67	99	103	3229	89.6944	1
ATGCCTTGAGTGTAGGACCGT_ssc-miR-532-5p	88	338	206	532	405	426	647	424	334	339	701	577	224	289	427	420	480	330	173	332	192	185	371	329	540	409	215	410	372	523	315	483	617	281	435	356	13725	381.25	1
ATGCGGAACCTGCGGATAC_ssc-miR-7134-3p	7	20	12	27	17	10	31	18	15	23	46	38	14	15	33	21	28	15	10	18	6	9	9	11	37	23	20	19	8	15	12	39	18	6	28	9	687	19.0833	0
ATGCGGAACCTGCGGATACG_ssc-miR-7134-3p	33	113	42	70	65	40	194	57	76	78	116	151	20	80	118	89	83	79	41	80	40	15	23	40	166	120	17	40	50	90	49	75	96	29	102	54	2631	73.0833	1
ATGCGGAACCTGCGGATACGA_ssc-miR-7134-3p	29	49	24	91	27	45	137	84	41	44	63	98	33	38	29	35	51	44	24	31	18	11	22	39	50	39	12	62	28	55	32	56	103	35	44	28	1651	45.8611	1
ATGCGGAACCTGCGGATACGC_ssc-miR-7134-3p	12	13	7	25	13	13	62	5	4	13	35	15	5	13	22	10	14	15	9	15	6	9	9	8	32	13	5	20	9	19	15	25	27	6	15	7	545	15.1389	0
ATGCGGAACCTGCGGATACGG_ssc-miR-7134-3p	319	785	460	796	657	434	1427	552	562	832	1297	1138	284	579	1059	704	722	767	489	602	360	285	309	411	1262	860	342	616	411	609	317	803	831	255	846	340	23322	647.833	1
ATGCGGAACCTGCGGATACGGA_ssc-miR-7134-3p	120	232	137	137	161	163	214	184	103	151	294	307	55	106	170	136	97	147	71	189	57	100	57	93	198	123	77	110	85	159	79	150	271	82	113	70	4998	138.833	1
ATGCGGAACCTGCGGATACGGT_ssc-miR-7134-3p	5	29	16	41	22	21	111	10	18	22	44	42	11	26	32	26	27	18	7	25	14	14	24	13	69	41	4	16	21	35	18	26	44	15	15	28	950	26.3889	1
ATGCGGAACCTGCGGATACGT_ssc-miR-7134-3p	3	20	9	62	13	35	133	26	26	8	48	22	17	29	11	17	35	14	10	19	18	6	25	18	33	18	7	38	28	47	23	22	58	28	11	23	960	26.6667	1
ATGGATTTTTGGAGC_bta-miR-1246	14	15	9	6	23	13	14	17	13	15	25	4	5	8	28	6	11	2	24	2	11	2	6	7	17	21	9	8	8	16	5	17	5	7	13	16	422	11.7222	0
ATGGCACTGGTAGAATTCAC_ssc-miR-183	8	22	20	28	23	20	45	13	15	35	59	68	5	15	32	15	19	27	12	18	13	19	11	14	35	32	6	16	13	33	9	28	25	8	31	14	806	22.3889	1
ATGGCACTGGTAGAATTCACA_ssc-miR-183	1	11	2	38	3	21	38	11	13	11	14	17	5	13	8	10	31	2	4	3	9	5	12	7	15	11	2	11	16	17	6	8	39	16	12	14	456	12.6667	0
ATGGCACTGGTAGAATTCACC_ssc-miR-183	22	70	45	281	61	109	303	126	102	92	169	91	64	116	103	72	261	52	43	52	60	26	116	75	132	96	37	119	99	144	65	102	202	88	113	76	3784	105.111	1
ATGGCACTGGTAGAATTCACG_ssc-miR-183	2	13	8	15	6	24	18	4	40	2	19	12	6	65	12	4	107	2	2	5	37	9	6	15	18	1	2	8	2	15	7	3	14	8	1	14	526	14.6111	0
ATGGCACTGGTAGAATTCACT_ssc-miR-183	141	551	294	731	420	555	1128	445	369	629	794	817	241	462	758	476	851	423	282	368	231	160	431	328	696	578	161	459	459	667	266	561	689	301	682	299	17703	491.75	1
ATGGCACTGGTAGAATTCACTA_ssc-miR-183	27	52	25	68	22	77	85	93	48	35	68	102	36	53	32	20	63	30	9	49	34	22	34	44	46	27	10	40	38	69	32	47	151	42	24	21	1675	46.5278	1
ATGGCACTGGTAGAATTCACTG_ssc-miR-183	525	1051	667	662	886	828	970	831	603	1030	1638	1965	232	666	1305	812	791	741	457	940	363	575	434	518	1229	837	401	539	539	869	258	958	1268	433	891	335	28047	779.083	1
ATGGCACTGGTAGAATTCACTGT_ssc-miR-183	10	27	18	10	16	30	20	22	11	10	31	32	9	10	18	12	15	9	4	15	5	14	18	18	16	7	3	6	8	22	10	14	57	15	18	10	570	15.8333	0
ATGGCACTGGTAGAATTCACTT_ssc-miR-183	0	3	1	26	0	31	31	37	16	1	13	6	5	16	2	2	37	2	1	2	13	1	11	16	7	0	0	17	17	24	8	6	51	23	1	8	435	12.0833	0
ATGGCCCTGACTGAAGACCTGCAGTC_bta-miR-1291	15	4	6	39	6	19	42	27	8	8	21	5	17	18	7	5	23	9	8	4	50	3	17	18	24	17	7	31	44	34	30	16	29	14	6	15	646	17.9444	0
ATGGCCCTGACTGAAGACCTGCAGTT_bta-miR-1291	80	35	84	136	68	71	114	81	70	136	140	23	61	90	81	36	78	95	64	74	159	42	72	75	106	64	54	99	110	122	86	86	132	34	66	52	2976	82.6667	1
ATGTACTCCAGCCTGGGCAACATAGCGAGACCCCGTCTCTT_ssc-miR-1285	39	13	16	19	37	13	35	21	34	4	54	3	26	28	29	21	16	66	58	20	54	7	35	4	30	2	28	37	18	43	16	57	24	11	25	28	971	26.9722	1
ATGTCCGCGGGTTCCCTATC_ssc-miR-7134-5p	20	72	40	51	18	10	105	26	28	47	53	41	7	31	44	10	23	22	46	46	34	13	11	12	66	48	18	31	22	30	9	32	64	18	29	13	1190	33.0556	1
ATGTCCGCGGGTTCCCTATCC_ssc-miR-7134-5p	107	283	155	162	154	128	277	175	125	146	245	325	53	176	232	166	112	130	113	151	109	62	78	69	201	144	109	115	145	177	66	181	190	50	173	62	5346	148.5	1
ATGTCCGCGGGTTCCCTATCCC_ssc-miR-7134-5p	15	69	36	28	72	59	67	65	39	31	63	103	21	56	73	70	25	36	23	49	25	29	34	48	57	32	27	51	37	39	18	45	40	21	59	27	1589	44.1389	1
ATGTCCGCGGGTTCCCTATCCT_ssc-miR-7134-5p	1	8	6	30	8	30	49	38	16	4	12	23	7	26	11	10	30	8	6	5	7	8	27	26	25	7	4	40	30	24	19	13	26	11	12	13	620	17.2222	0
ATGTCCGCGGGTTCCCTATCT_ssc-miR-7134-5p	18	66	16	62	15	60	156	65	48	29	61	46	28	48	21	15	50	12	21	18	55	8	34	45	57	18	12	56	56	71	37	28	108	33	17	31	1521	42.25	1
ATGTGCCTTTGGACTACATCGT_ssc-miR-455-5p	9	64	19	38	18	33	45	29	13	13	30	57	6	16	32	19	23	12	3	7	13	13	18	22	25	20	10	11	20	32	9	30	17	22	13	13	774	21.5	1
ATGTTGGTCTAGTTCTGTG_ssc-mir-7-2	19	4	21	32	64	32	37	30	25	41	69	76	12	39	40	32	38	37	7	26	15	34	31	40	51	32	17	36	22	39	9	29	37	17	41	19	1150	31.9444	1
ATTGCACATTACTAAGTTGCA_ssc-miR-32	14	43	26	13	44	34	25	20	12	37	68	237	5	22	44	31	25	51	10	58	6	19	31	52	57	33	15	19	13	37	14	45	68	14	18	18	1278	35.5	1
ATTGCACGGTATCCATCTGTA_ssc-miR-363	4	12	12	9	25	21	8	11	7	9	37	9	7	3	6	15	5	12	3	31	2	23	20	11	11	3	11	10	19	17	1	22	6	13	28	10	453	12.5833	0
ATTGCACTCGTCCCGGCCT_ssc-miR-92b-3p	1	8	2	4	6	5	44	13	8	11	17	9	4	3	6	5	20	2	1	15	2	3	3	3	19	6	0	3	4	11	4	9	30	17	1	3	302	8.38889	0
ATTGCACTCGTCCCGGCCTC_ssc-miR-92b-3p	4	21	13	12	14	2	45	10	14	20	20	23	2	5	9	13	16	6	6	25	6	8	7	3	51	16	2	8	13	13	5	14	47	9	3	3	488	13.5556	0
ATTGCACTCGTCCCGGCCTCA_ssc-miR-92b-3p	3	12	10	17	1	3	76	17	12	8	21	24	4	2	5	4	14	2	4	14	7	2	1	2	42	14	2	8	19	11	9	6	49	13	2	1	441	12.25	0
ATTGCACTCGTCCCGGCCTCC_ssc-miR-92b-3p	27	102	35	67	38	35	297	86	52	97	171	136	25	27	74	49	85	14	59	95	44	24	14	19	253	90	22	45	64	72	25	80	160	60	52	12	2607	72.4167	1
ATTGCACTCGTCCCGGCCTCCT_ssc-miR-92b-3p	1	17	1	18	3	6	49	10	7	15	19	16	4	4	6	1	12	1	5	6	7	2	4	1	26	12	5	12	8	10	3	4	34	13	3	1	346	9.61111	0
ATTGCACTCGTCCCGGCCTCT_ssc-miR-92b-3p	3	43	14	57	3	15	292	48	64	26	50	31	13	25	13	5	77	6	15	17	27	4	12	10	96	28	3	38	53	47	27	32	169	43	9	14	1429	39.6944	1
ATTGCACTTGTCCCGGCCTG_ssc-miR-92a	62	171	132	63	127	108	79	121	69	82	123	241	21	106	100	67	46	77	40	177	64	121	45	78	84	88	46	56	83	139	52	123	171	34	80	46	3322	92.2778	1
ATTGCACTTGTCCCGGCCTGA_ssc-miR-92a	32	91	71	102	67	210	138	227	113	25	137	127	51	122	75	20	65	26	19	62	98	54	83	105	38	13	23	95	85	123	80	75	308	70	33	42	3105	86.25	1
ATTGCACTTGTCCCGGCCTGC_ssc-miR-92a	270	460	409	1072	433	1116	946	1601	805	330	889	630	403	805	523	343	577	415	311	382	610	344	733	678	487	237	233	859	690	814	696	938	1687	532	533	553	23344	648.444	1
ATTGCACTTGTCCCGGCCTGG_ssc-miR-92a	21	72	40	30	38	78	55	86	281	17	71	60	21	326	27	14	236	18	20	43	249	30	46	41	51	13	15	49	36	50	43	54	117	36	21	71	2476	68.7778	1
ATTGCACTTGTCCCGGCCTGT_ssc-miR-92a	1632	2835	2574	2883	3070	4471	3087	4717	2818	1752	4235	4814	1290	2675	3177	2096	1722	2385	1498	2822	1761	2234	2425	2627	2418	1405	1400	2721	2386	3042	2117	3940	5839	1803	2556	1847	97074	2696.5	1
ATTGCACTTGTCCCGGCCTGTA_ssc-miR-92a	268	593	295	321	412	346	329	432	319	267	501	842	143	292	423	366	242	337	313	335	170	251	182	251	330	234	184	307	225	303	187	486	551	146	403	192	11778	327.167	1
ATTGCACTTGTCCCGGCCTGTG_ssc-miR-92a	6	17	10	11	12	14	12	22	14	4	20	29	3	30	4	5	20	7	9	7	19	9	5	8	5	3	5	6	8	15	10	13	13	7	7	8	397	11.0278	0
ATTGCACTTGTCCCGGCCTGTT_ssc-miR-92a	10	64	28	33	38	44	40	44	25	20	65	51	23	31	24	26	21	23	9	28	10	20	38	31	21	22	10	23	27	29	33	42	68	28	35	25	1109	30.8056	1
ATTGCACTTGTCTCGGTCTG_bta-miR-25	15	32	32	21	37	37	46	35	27	26	41	80	14	41	53	29	25	43	20	47	13	16	27	19	45	40	15	22	21	38	29	42	30	17	62	29	1166	32.3889	1
ATTGCACTTGTCTCGGTCTGA_bta-miR-25	61	182	149	64	196	204	82	147	83	74	202	434	42	77	121	83	43	126	24	149	23	126	74	106	78	67	78	57	89	99	73	151	236	90	87	69	4046	112.389	1
ATTGCACTTGTCTCGGTCTGAA_bta-miR-25	7	21	12	3	13	20	8	17	16	8	16	34	4	6	13	15	6	11	5	23	6	12	11	6	13	3	11	7	8	7	7	14	13	11	22	5	414	11.5	0
ATTGCACTTGTCTCGGTCTGT_bta-miR-25	3	25	7	7	12	28	15	15	6	7	16	20	5	19	12	15	7	13	3	13	10	10	13	11	11	6	8	5	9	22	12	6	23	8	13	10	425	11.8056	0
ATTGCACTTTAGCAATGGTG_bta-miR-367	6	24	13	7	17	13	9	9	10	7	29	45	5	11	18	14	5	23	2	27	2	16	5	21	12	12	8	5	11	22	3	14	23	2	8	2	460	12.7778	0
ATTGCACTTTAGCAATGGTGA_bta-miR-367	15	17	20	15	18	36	3	21	6	2	22	74	5	6	24	8	1	34	3	54	3	31	11	30	14	5	7	10	8	14	3	14	44	11	11	8	608	16.8889	0
ATTGTTCTCCAACCTGGCTCC_ssc-miR-7857-3p	8	8	13	21	9	28	33	29	26	9	11	13	10	9	11	6	23	10	3	23	15	11	11	25	26	15	4	39	22	34	7	21	29	14	11	15	602	16.7222	0
ATTGTTCTCCAACCTGGCTCT_ssc-miR-7857-3p	38	68	83	91	63	104	120	126	65	62	106	145	21	62	86	42	66	67	31	140	45	38	48	83	104	72	42	73	88	135	44	74	161	48	41	42	2724	75.6667	1
ATTGTTCTCCAACCTGGCTCTA_ssc-miR-7857-3p	12	24	18	8	16	45	21	34	11	6	16	44	3	7	3	5	15	18	12	27	3	16	6	24	12	3	7	15	16	30	7	12	79	12	4	6	597	16.5833	0
ATTGTTCTCCAACCTGGCTCTC_ssc-miR-7857-3p	26	31	32	123	25	114	151	140	95	24	92	55	45	57	36	15	94	28	40	39	43	18	57	85	72	27	13	110	68	102	45	53	235	73	45	43	2351	65.3056	1
ATTGTTCTCCAACCTGGCTCTT_ssc-miR-7857-3p	243	306	294	341	312	528	528	601	389	310	514	702	112	242	349	190	380	303	223	504	165	240	246	368	493	248	187	408	284	484	174	399	982	289	259	197	12794	355.389	1
ATTGTTCTCCAACCTGGCTCTTA_ssc-miR-7857-3p	28	58	33	31	38	52	43	40	42	32	58	152	7	20	47	29	12	36	13	52	12	28	12	43	30	21	18	28	20	41	20	29	106	20	22	10	1283	35.6389	1
ATTGTTCTCCAACCTGGCTCTTC_ssc-miR-7857-3p	27	18	30	72	31	73	99	111	83	17	75	58	25	40	29	13	64	29	33	49	23	15	47	65	59	22	17	71	52	98	46	48	233	55	17	33	1877	52.1389	1
ATTGTTCTCCAACCTGGCTCTTT_ssc-miR-7857-3p	264	230	251	217	295	473	353	489	350	206	597	788	81	214	274	189	267	253	187	478	135	230	158	301	408	201	134	330	287	388	125	323	946	253	183	138	10996	305.444	1
ATTGTTCTCCAACCTGGCTCTTTA_ssc-miR-7857-3p	48	49	30	44	23	40	44	62	40	42	88	169	5	22	53	37	39	32	59	72	28	22	10	26	100	41	22	42	45	52	21	52	120	26	39	11	1655	45.9722	1
ATTGTTCTCCAACCTGGCTCTTTT_ssc-miR-7857-3p	5	4	5	9	16	17	20	31	18	16	26	20	1	9	25	11	10	10	4	25	11	5	11	16	22	10	7	16	17	19	10	18	38	15	1	3	501	13.9167	0
CAAAACGTGAGGCGCTGCTA_ssc-miR-424-3p	19	24	29	26	39	24	29	24	26	31	25	35	9	24	46	15	11	18	8	38	32	17	10	11	40	32	10	32	17	45	14	29	52	6	18	11	876	24.3333	1
CAAAACGTGAGGCGCTGCTAC_ssc-miR-424-3p	9	7	10	88	20	41	79	64	44	32	48	18	29	57	21	14	30	16	16	20	51	18	31	39	41	19	6	68	32	51	29	56	85	22	27	34	1272	35.3333	1
CAAAACGTGAGGCGCTGCTAT_ssc-miR-424-3p	100	81	155	255	198	286	299	262	226	174	287	186	82	197	233	94	122	174	127	212	166	151	110	181	245	139	64	244	167	278	140	320	383	143	176	94	6751	187.528	1
CAAAACGTGAGGCGCTGCTATA_ssc-miR-424-3p	136	101	119	122	242	221	154	268	149	125	267	415	30	88	272	96	81	124	156	217	74	168	43	125	156	101	81	198	102	143	61	259	283	58	124	54	5413	150.361	1
CAAAACGTGAGGCGCTGCTATAA_ssc-miR-424-3p	16	6	7	11	10	13	10	17	8	12	15	22	1	11	23	6	3	12	10	18	10	12	4	2	15	5	11	15	4	18	5	23	28	9	16	3	411	11.4167	0
CAAACTGTGGGGGCACTT_ssc-miR-371-5p	4	11	9	6	22	14	13	27	8	22	10	3	3	23	6	8	17	21	15	8	11	6	38	25	23	13	5	26	43	38	21	35	13	7	11	18	583	16.1944	0
CAAACTGTGGGGGCACTTC_ssc-miR-371-5p	3	0	2	20	5	25	26	30	12	2	9	0	20	20	5	3	9	1	12	3	17	2	33	10	9	5	4	16	14	25	20	12	18	9	6	13	420	11.6667	0
CAAACTGTGGGGGCACTTT_ssc-miR-371-5p	33	32	51	74	89	148	84	106	64	55	107	30	50	92	65	73	54	47	42	46	70	59	116	70	76	55	41	74	66	108	65	99	82	23	84	49	2479	68.8611	1
CAAACTGTGGGGGCACTTTC_ssc-miR-371-5p	19	17	13	30	42	45	16	49	24	17	60	38	19	27	41	36	13	24	11	23	25	16	35	24	16	11	15	31	12	36	21	34	34	8	27	15	924	25.6667	1
CAAACTGTGGGGGCACTTTCT_ssc-mir-371	12	37	24	9	23	42	20	46	18	16	25	41	11	24	22	10	10	10	10	13	13	18	29	25	22	14	5	7	22	21	18	29	40	11	19	18	734	20.3889	1
CAAACTGTGGGGGCACTTTG_ssc-miR-371-5p	12	27	15	70	43	20	74	28	26	56	59	26	30	52	64	48	47	46	62	6	48	8	24	8	39	53	25	32	14	42	34	73	15	6	118	24	1374	38.1667	1
CAAAGAATTCTCCTTTTGGG_ssc-miR-186	21	64	32	21	63	42	54	30	17	54	99	124	12	25	47	33	31	40	22	81	10	18	29	42	70	40	18	24	32	85	26	64	63	13	41	24	1511	41.9722	1
CAAAGAATTCTCCTTTTGGGC_ssc-miR-186	26	136	61	49	84	80	155	54	46	87	135	159	32	75	101	49	63	107	24	147	31	40	38	60	126	100	31	47	84	125	39	85	107	37	88	83	2791	77.5278	1
CAAAGAATTCTCCTTTTGGGCA_ssc-miR-186	8	26	13	19	5	36	24	30	12	4	34	37	10	10	4	4	15	6	2	30	11	6	10	21	15	6	1	15	16	38	15	14	91	30	5	22	645	17.9167	0
CAAAGAATTCTCCTTTTGGGCC_ssc-miR-186	18	35	34	75	37	97	106	84	47	32	95	77	38	56	30	11	55	44	9	62	42	33	56	67	60	41	17	61	74	115	54	56	176	51	23	72	2040	56.6667	1
CAAAGAATTCTCCTTTTGGGCT_ssc-miR-186	103	381	243	203	246	387	426	339	179	144	403	522	121	250	207	108	177	218	54	349	103	175	154	332	336	136	67	166	249	385	180	260	738	210	136	257	8944	248.444	1
CAAAGAATTCTCCTTTTGGGCTC_ssc-miR-186	12	25	20	36	26	79	45	85	30	6	45	42	22	26	18	8	22	22	3	15	11	15	23	41	22	6	8	41	22	38	32	31	118	30	11	32	1068	29.6667	1
CAAAGAATTCTCCTTTTGGGCTT_ssc-miR-186	110	229	132	111	196	371	151	274	122	70	296	463	48	131	130	68	62	142	42	208	52	138	90	233	129	47	60	90	119	202	113	169	444	117	74	108	5541	153.917	1
CAAAGAATTCTCCTTTTGGGT_ssc-miR-186	2	19	12	28	9	29	44	17	17	6	22	13	15	18	8	8	21	14	2	8	7	1	15	29	21	7	5	20	33	54	36	13	56	22	11	30	672	18.6667	0
CAAAGCACACGGCCTGCAGAGA_bta-miR-330	33	69	29	19	33	36	29	27	19	32	58	97	9	24	43	28	21	36	22	38	18	12	8	35	34	21	10	19	24	29	13	36	55	10	20	12	1058	29.3889	1
CAAAGCACACGGCCTGCAGAGAG_bta-miR-330	25	40	21	18	19	25	41	15	16	37	36	63	7	25	38	25	16	34	30	29	10	17	8	12	28	14	8	19	17	18	17	25	25	9	21	11	819	22.75	1
CAAAGCACACGGCCTGCAGAGAGG_ENSSSCG00000026843	23	28	11	9	19	13	13	13	22	13	22	35	4	17	18	15	14	18	11	12	16	15	7	13	16	9	10	1	10	14	7	39	20	7	7	7	528	14.6667	0
CAAAGCACACGGCCTGCAGAGAGT_hsa-mir-330	13	69	27	62	52	39	101	36	25	33	67	71	29	51	74	60	42	50	53	21	38	15	51	43	67	32	29	53	34	49	31	92	53	17	59	28	1666	46.2778	1
CAAAGTGCTCACAGTGCAGGTAG_ssc-miR-20b	10	22	16	0	22	26	2	15	10	0	22	28	2	10	3	6	1	4	2	17	0	23	4	3	5	1	4	8	7	1	2	11	21	5	2	5	320	8.88889	0
CAAAGTGCTGTTCGTGCAGGT_bta-miR-93	17	66	36	23	44	77	44	48	41	17	61	155	24	32	45	21	11	31	10	42	20	34	24	47	34	19	9	21	38	57	32	38	105	39	15	29	1406	39.0556	1
CAAAGTGCTGTTCGTGCAGGTAA_bta-miR-93	21	39	42	24	38	106	28	75	36	13	53	143	23	31	14	10	28	13	5	34	11	28	30	48	12	4	9	33	35	44	40	34	163	40	6	37	1350	37.5	1
CAAAGTGCTGTTCGTGCAGGTAG_bta-miR-93	511	1255	934	320	1260	1345	469	1088	623	387	1517	3615	232	618	712	504	311	621	206	1351	267	937	357	781	621	295	352	432	483	756	379	841	1597	424	426	410	27237	756.583	1
CAAAGTGCTGTTCGTGCAGGTAGA_bta-miR-93	59	148	104	41	129	99	79	128	76	63	169	327	31	64	130	69	40	77	45	116	26	75	39	75	99	54	50	61	75	95	43	85	115	42	48	32	3008	83.5556	1
CAAAGTGCTGTTCGTGCAGGTAGT_bta-miR-93	10	49	9	5	19	31	17	20	4	9	35	56	4	12	7	9	11	9	3	21	2	10	12	13	14	6	3	15	11	23	4	14	61	18	3	15	564	15.6667	0
CAAAGTGCTTACAGTGCAGGC_ssc-miR-17-5p	4	8	6	10	5	34	8	25	11	1	12	33	4	11	2	2	6	4	1	9	4	10	8	9	10	0	1	11	12	18	12	11	34	7	1	10	354	9.83333	0
CAAAGTGCTTACAGTGCAGGT_ssc-miR-17-5p	20	104	45	18	52	110	41	96	46	13	71	228	15	34	33	17	30	27	6	50	16	51	32	68	25	12	14	23	33	54	23	50	144	32	15	38	1686	46.8333	1
CAAAGTGCTTACAGTGCAGGTA_ssc-miR-17-5p	15	57	46	6	56	57	12	38	19	15	38	209	10	21	32	17	11	35	1	72	7	67	24	36	20	12	12	12	17	41	8	34	99	15	12	21	1204	33.4444	1
CAAAGTGCTTACAGTGCAGGTAA_ssc-miR-17-5p	26	86	49	36	46	212	51	146	48	18	93	319	24	43	17	22	26	20	12	62	20	56	35	112	23	9	12	32	52	73	32	62	296	60	18	36	2284	63.4444	1
CAAAGTGCTTACAGTGCAGGTAG_ssc-miR-17-5p	832	2125	1626	435	1945	2397	583	1824	819	522	2119	6735	224	763	1010	641	350	995	215	2564	417	1971	489	1220	794	353	529	612	687	1133	451	1430	2952	650	522	525	43459	1207.19	1
CAAAGTGCTTACAGTGCAGGTAGA_ssc-miR-17-5p	409	1091	593	355	897	809	407	848	477	401	1251	2570	147	416	728	481	226	544	199	801	183	578	303	491	532	270	296	388	459	749	243	816	973	362	340	272	20905	580.694	1
CAAAGTGCTTACAGTGCAGGTAGAA_ssc-miR-17-5p	12	17	5	9	11	14	5	14	11	2	25	63	0	8	5	3	4	4	4	16	5	13	4	13	4	1	5	3	4	6	5	10	22	6	4	4	341	9.47222	0
CAAAGTGCTTACAGTGCAGGTAGG_ssc-miR-17-5p	4	14	9	6	5	9	5	8	36	4	15	22	3	49	7	5	28	7	2	12	21	3	7	9	15	4	2	11	9	16	5	5	29	10	2	5	403	11.1944	0
CAAAGTGCTTACAGTGCAGGTAGT_ssc-miR-17-5p	4	25	24	22	43	67	28	40	10	9	44	57	11	15	25	19	23	16	8	29	14	36	20	36	12	8	10	18	30	34	13	37	78	24	14	14	917	25.4722	1
CAAATTCGTATCTAGGGGAAT_ssc-miR-10a-3p	4	125	22	30	16	24	142	22	28	33	96	96	27	48	17	8	48	30	6	48	12	21	15	26	70	32	8	8	31	56	39	27	155	41	22	50	1483	41.1944	1
CAACCCGTAGATCCGATCTTGT_ssc-miR-99a	1	21	1	5	7	1	58	12	7	3	18	17	13	13	6	2	11	4	2	14	2	4	3	2	50	15	2	3	7	11	12	2	23	8	4	6	370	10.2778	0
CAACGGAATCCCAAAAGC_ssc-miR-191	44	106	68	35	74	62	73	58	44	49	158	204	13	33	56	30	45	83	35	73	29	24	30	45	89	51	20	48	39	71	31	49	137	38	56	23	2123	58.9722	1
CAACGGAATCCCAAAAGCAG_ssc-miR-191	12	21	12	3	16	15	17	16	5	12	20	81	5	13	7	5	10	9	1	25	3	14	4	5	30	12	3	2	12	25	9	13	41	8	4	7	497	13.8056	0
CAACGGAATCCCAAAAGCAGC_ssc-miR-191	77	282	107	62	144	129	154	136	69	60	260	466	30	89	117	50	49	84	41	196	48	96	35	82	134	46	46	58	58	141	66	85	310	77	67	77	4028	111.889	1
CAACGGAATCCCAAAAGCAGCA_ssc-miR-191	18	72	32	51	16	105	90	138	38	8	65	82	20	47	11	10	37	19	10	29	35	14	30	43	29	7	2	43	49	97	39	18	341	79	6	38	1768	49.1111	1
CAACGGAATCCCAAAAGCAGCC_ssc-miR-191	102	357	169	219	193	404	462	428	235	112	384	366	127	319	113	46	210	124	56	245	152	126	172	258	213	65	46	181	238	385	205	186	1022	258	86	213	8477	235.472	1
CAACGGAATCCCAAAAGCAGCG_ssc-miR-191	6	61	26	9	19	28	25	44	104	3	32	30	6	123	7	7	107	4	6	25	86	10	11	23	27	4	3	5	19	30	14	12	95	16	2	28	1057	29.3611	1
CAACGGAATCCCAAAAGCAGCT_ssc-miR-191	536	2303	1074	631	1016	1537	1474	1478	909	454	1784	2763	403	1043	659	335	603	608	257	1380	472	724	582	958	906	335	262	565	783	1392	686	691	3667	933	437	723	35363	982.306	1
CAACGGAATCCCAAAAGCAGCTA_ssc-miR-191	163	339	183	354	180	580	394	530	292	88	391	620	154	314	152	67	221	119	125	193	229	162	212	297	202	52	66	309	286	346	243	241	972	303	116	228	9723	270.083	1
CAACGGAATCCCAAAAGCAGCTC_ssc-miR-191	36	33	22	27	31	46	44	53	25	20	42	59	13	28	36	16	26	32	17	20	22	20	21	22	40	13	15	50	28	36	37	26	87	30	17	19	1109	30.8056	1
CAACGGAATCCCAAAAGCAGCTG_ssc-miR-191	4556	7257	4890	3775	7098	6989	4903	5913	4505	3756	9535	12707	1771	5002	6398	3006	2799	4612	3772	6540	3248	4788	2502	4172	5458	2951	2379	3730	3530	5086	2815	5750	8857	2744	4591	2858	175243	4867.86	1
CAACGGAATCCCAAAAGCAGCTGA_ssc-miR-191	72	165	78	48	83	113	44	107	66	49	145	273	29	76	79	40	31	47	61	99	36	70	46	49	58	39	35	55	49	106	40	70	143	58	47	45	2651	73.6389	1
CAACGGAATCCCAAAAGCAGCTGC_ssc-miR-191	6	45	15	24	17	53	39	27	13	4	35	36	9	21	9	2	8	3	5	7	24	10	17	26	13	2	5	11	18	18	25	19	76	30	8	27	707	19.6389	0
CAACGGAATCCCAAAAGCAGCTGG_ssc-miR-191	11	19	8	26	7	19	8	15	10	8	17	11	9	35	19	10	19	11	13	9	21	14	9	12	23	18	2	8	6	14	15	13	18	7	20	11	495	13.75	0
CAACGGAATCCCAAAAGCAGCTGT_ssc-miR-191	47	209	81	40	110	212	110	123	58	40	147	215	46	96	81	24	42	45	20	79	33	97	63	102	73	43	25	40	60	111	61	71	309	70	40	79	3102	86.1667	1
CAACGGAATCCCAAAAGCAGCTT_ssc-miR-191	10	90	48	128	25	207	147	169	89	9	96	44	52	92	12	8	92	16	19	58	89	19	71	79	44	9	8	114	71	118	87	41	347	112	17	79	2716	75.4444	1
CAACGGAATCCCAAAAGCAGT_ssc-miR-191	9	34	12	29	12	55	52	30	17	4	29	44	15	29	7	4	20	9	3	16	25	4	6	28	17	5	0	12	28	34	27	18	92	31	9	22	788	21.8889	1
CAAGCTCGTGTCTGTGGGTCCG_hsa-miR-99b-3p	14	34	16	22	30	14	33	21	24	29	52	49	12	29	27	21	22	14	13	21	13	22	13	17	40	26	19	25	12	20	5	26	12	7	45	11	810	22.5	1
CAAGTGCTTCCATGTTTTAGA_bta-miR-302a	2	24	9	14	6	32	22	31	19	4	12	26	6	18	12	2	10	7	1	8	9	9	10	18	7	4	3	16	14	33	12	13	46	11	5	12	487	13.5278	0
CAAGTGCTTCCATGTTTTAGC_bta-miR-302a	112	216	170	268	194	386	363	458	218	105	320	381	130	259	280	152	167	175	71	227	118	125	179	257	153	87	69	219	210	331	194	366	455	155	190	207	7967	221.306	1
CAAGTGCTTCCATGTTTTAGG_bta-miR-302a	7	36	20	17	9	24	17	24	80	4	14	24	14	129	11	5	70	12	2	17	49	5	12	20	24	3	2	5	7	15	6	13	29	15	7	22	770	21.3889	1
CAAGTGCTTCCATGTTTTAGTA_bta-miR-302a	43	126	97	41	138	122	62	106	49	44	115	298	34	66	124	64	20	98	31	151	16	88	55	76	71	35	42	43	62	68	38	104	107	26	84	47	2791	77.5278	1
CAAGTGCTTCCATGTTTTAGTG_bta-miR-302a	57	260	123	36	186	125	75	156	101	75	158	422	43	133	240	143	57	105	21	204	36	114	56	89	100	73	56	68	68	104	48	145	100	42	125	57	4001	111.139	1
CAAGTGCTTCCATGTTTTAGTGA_bta-miR-302a	258	1108	414	253	769	587	479	593	337	308	729	1808	168	425	1127	645	209	490	178	681	113	354	303	383	481	326	267	295	379	547	212	759	555	200	546	250	17536	487.111	1
CAAGTGCTTCCATGTTTTAGTGAA_bta-miR-302a	9	35	10	14	24	11	16	17	11	12	19	54	6	19	18	14	5	13	4	23	7	10	10	6	9	3	0	7	12	15	4	20	10	4	14	8	473	13.1389	0
CAAGTGCTTCCATGTTTTAGTGC_bta-miR-302a	13	61	28	38	44	89	87	91	39	27	62	112	22	54	76	58	49	27	21	38	14	22	43	48	41	35	23	41	40	71	27	77	81	31	44	31	1705	47.3611	1
CAAGTGCTTCCATGTTTTAGTGG_bta-miR-302a	9	46	30	20	17	31	20	34	56	14	34	58	10	85	34	8	51	22	4	25	21	14	12	25	35	5	12	21	17	29	20	28	38	16	20	20	941	26.1389	1
CAAGTGCTTCCATGTTTTAGTGT_bta-miR-302a	80	290	129	119	204	245	264	275	198	93	264	461	66	175	282	215	106	99	48	212	60	99	150	155	162	114	82	144	188	250	106	215	290	94	158	91	6183	171.75	1
CAATCACTAATTCCACTGCCATC_ENSSSCG00000027451	3	120	33	18	32	17	274	41	32	41	175	252	9	18	39	15	47	9	0	107	12	15	6	2	150	44	11	12	58	96	8	27	149	43	5	2	1922	53.3889	1
CAATGGATTTTTGGAGCT_bta-miR-1246	27	14	9	4	23	30	18	31	6	34	21	5	25	35	15	6	28	7	32	7	32	7	19	9	17	13	10	19	17	13	13	14	11	18	9	7	605	16.8056	0
CAATTTAGTGTGTGTGATATT_hsa-miR-32-3p	11	20	12	9	29	40	21	27	9	12	23	49	7	19	23	18	22	12	7	25	8	16	16	18	18	15	9	7	10	20	12	17	59	19	16	12	667	18.5278	0
CACAGTGAACCGGTCTCTT_ssc-miR-128	17	54	35	67	32	48	86	36	34	48	78	81	18	34	50	41	55	41	25	46	22	20	32	41	71	50	20	43	55	72	31	59	79	33	50	46	1650	45.8333	1
CACAGTGAACCGGTCTCTTA_ssc-miR-128	22	22	26	43	22	36	54	41	20	34	20	36	17	27	18	25	28	25	22	19	17	20	21	26	31	18	7	45	27	30	24	41	45	21	31	18	979	27.1944	1
CACAGTGAACCGGTCTCTTC_ssc-miR-128	54	118	76	598	85	251	610	361	267	155	250	131	180	257	177	112	422	149	125	89	258	41	257	234	275	126	72	492	289	341	286	334	475	232	149	229	8557	237.694	1
CACAGTGAACCGGTCTCTTG_ssc-miR-128	1	12	1	12	4	13	17	7	27	1	5	5	3	67	4	5	63	6	3	5	38	1	5	10	20	5	0	15	5	9	5	3	9	16	3	15	420	11.6667	0
CACAGTGAACCGGTCTCTTT_ssc-miR-128	618	1329	884	2138	984	1465	2452	1501	1185	1578	2004	1757	605	1310	2154	1381	1536	1399	1005	976	990	539	976	1208	2152	1380	649	1826	986	1490	1035	2386	2238	861	1752	926	49655	1379.31	1
CACAGTGAACCGGTCTCTTTA_ssc-miR-128	102	240	133	320	142	188	322	189	170	291	302	403	74	192	378	217	192	240	221	156	144	77	107	151	275	206	97	259	139	201	120	402	283	101	277	122	7433	206.472	1
CACAGTGAACCGGTCTCTTTC_ssc-miR-128	152	558	287	729	414	449	876	359	270	756	538	572	257	440	1129	801	562	535	391	284	362	211	432	391	772	590	251	511	412	460	361	1092	570	244	985	276	18279	507.75	1
CACAGTGAACCGGTCTCTTTCC_ssc-mir-128-2	7	8	6	33	8	18	30	7	8	14	12	14	13	24	26	25	12	11	14	2	19	4	20	9	11	17	9	9	12	19	19	36	15	11	31	16	549	15.25	0
CACAGTGAACCGGTCTCTTTG_ssc-miR-128	4	11	6	6	12	11	20	8	20	5	13	24	4	38	8	3	27	8	3	16	16	9	5	7	9	2	3	7	5	11	5	12	17	4	4	8	371	10.3056	0
CACAGTGAACCGGTCTCTTTT_ssc-miR-128	58	264	153	371	206	321	523	203	170	320	299	259	183	297	524	353	286	276	172	154	196	129	256	271	367	237	80	280	248	286	246	640	469	180	389	206	9872	274.222	1
CACAGTGAACCGGTCTCTTTTT_ssc-mir-128-1	5	37	17	42	28	44	60	19	17	38	37	35	21	34	81	43	35	33	22	10	26	18	20	31	33	29	7	23	27	49	26	95	46	17	56	28	1189	33.0278	1
CACCCGTAGAACCGACCTTG_ssc-miR-99b	6	46	12	24	24	19	81	26	28	34	43	42	22	28	18	16	28	16	22	22	17	13	16	27	41	40	12	14	26	28	19	22	47	17	35	27	958	26.6111	1
CACCCGTAGAACCGACCTTGC_ssc-miR-99b	36	244	72	105	78	65	285	118	84	141	275	190	64	113	93	47	155	86	51	136	59	53	61	66	288	206	38	64	90	148	79	77	269	53	149	90	4228	117.444	1
CACCCGTAGAACCGACCTTGCA_ssc-miR-99b	30	91	46	129	40	66	282	104	65	56	165	125	67	84	28	41	140	42	50	36	63	30	61	45	152	76	40	97	74	95	62	59	202	58	67	59	2927	81.3056	1
CACCCGTAGAACCGACCTTGCC_ssc-miR-99b	9	31	16	24	22	7	38	14	16	43	47	29	6	11	18	15	8	27	20	20	10	10	10	8	56	55	18	9	10	7	9	23	16	8	28	9	707	19.6389	0
CACCCGTAGAACCGACCTTGCG_ssc-miR-99b	346	1141	532	941	634	471	2031	701	710	1060	1711	1184	378	878	845	633	1061	605	809	683	528	385	401	488	1996	1445	495	685	539	859	396	741	1102	396	1208	456	29474	818.722	1
CACCCGTAGAACCGACCTTGCGA_ssc-miR-99b	7	58	9	6	12	15	50	20	13	15	38	40	7	12	8	0	18	14	8	29	4	11	8	12	22	20	9	6	11	21	11	20	51	12	14	18	629	17.4722	0
CACCCGTAGAACCGACCTTGCGT_ssc-miR-99b	1	72	18	10	13	21	51	11	9	16	34	28	16	23	7	2	18	9	2	15	7	5	10	16	38	14	8	6	11	30	15	11	81	26	10	37	701	19.4722	0
CACCCGTAGAACCGACCTTGCT_ssc-miR-99b	2	14	3	30	2	6	56	23	14	3	22	3	9	18	2	3	43	5	6	7	17	3	20	13	25	7	7	29	23	15	17	8	49	13	4	15	536	14.8889	0
CACCCGTAGAACCGACCTTGT_ssc-miR-99b	1	30	4	34	5	26	159	35	24	15	49	24	31	39	14	5	76	5	6	9	20	4	18	21	35	10	5	18	38	42	39	9	98	35	15	42	1040	28.8889	1
CACCTCCCCTGCAAACGTCCA_ssc-miR-1306-5p	19	32	15	5	15	10	4	12	14	8	17	34	8	7	15	12	4	13	8	19	9	16	10	8	13	7	12	14	4	7	3	12	26	7	9	4	432	12	0
CACTACAGAACTTTGT_ssc-miR-148a-3p	5	11	1	22	8	4	34	7	12	20	24	19	16	13	29	21	27	9	6	3	3	5	17	9	13	33	14	16	19	21	11	11	7	5	27	16	518	14.3889	0
CACTAGATTGTGAGCTCCTG_ssc-miR-28-3p	5	40	23	12	22	21	24	12	18	20	24	37	10	18	34	18	11	36	11	29	12	9	5	18	32	26	5	14	17	37	20	21	19	5	31	5	701	19.4722	0
CACTAGATTGTGAGCTCCTGG_ssc-miR-28-3p	55	135	77	74	127	116	142	106	75	67	145	226	44	103	176	72	53	138	92	111	55	58	42	93	134	81	28	83	71	117	49	90	123	21	110	61	3350	93.0556	1
CACTAGATTGTGAGCTCCTGGA_ssc-miR-28-3p	255	553	226	179	379	413	321	402	224	210	445	918	122	275	596	206	160	443	265	349	117	241	173	349	339	257	147	199	190	273	158	363	409	122	367	197	10842	301.167	1
CACTAGATTGTGAGCTCCTGGAA_ssc-miR-28-3p	60	109	46	45	61	81	63	92	50	47	102	188	18	49	121	58	27	90	42	94	22	49	25	71	69	56	35	53	43	66	35	61	88	31	75	30	2252	62.5556	1
CACTAGATTGTGAGCTCCTGGAAA_ssc-miR-28-3p	41	76	27	28	35	36	46	47	41	41	63	102	14	34	77	34	17	60	78	58	22	25	17	23	62	25	21	34	27	35	13	44	57	16	33	16	1425	39.5833	1
CACTCAAACTGTGGGGGCACTT_ssc-miR-371-5p	4	18	11	14	24	21	10	21	5	10	18	26	4	25	17	11	13	17	8	14	7	14	11	15	16	8	5	18	24	21	20	24	22	22	6	11	535	14.8611	0
CACTCAAACTGTGGGGGCACTTT_ssc-miR-371-5p	42	59	26	56	54	105	49	102	54	24	87	120	28	58	61	54	44	51	31	54	39	47	43	48	30	41	28	51	34	52	34	71	94	23	43	38	1875	52.0833	1
CACTCAAACTGTGGGGGCACTTTC_ssc-miR-371-5p	22	23	12	16	14	33	16	37	21	17	19	38	3	13	32	14	7	11	13	12	12	17	13	20	11	14	9	14	13	24	12	32	28	3	21	10	626	17.3889	0
CACTGGACTTGGAGTCAGAAGG_ssc-miR-378	5	43	11	11	24	15	17	16	6	7	10	46	7	14	14	15	14	20	4	30	8	18	12	15	18	18	2	12	11	26	3	18	18	12	28	9	557	15.4722	0
CACTGGACTTGGAGTCAGAAGGC_ssc-miR-378	58	171	57	115	176	137	156	125	92	87	205	250	60	105	221	170	86	173	84	92	58	79	128	100	147	117	79	114	76	145	96	196	75	48	256	92	4426	122.944	1
CACTGGACTTGGAGTCAGAAGGT_ssc-miR-378	3	15	4	47	16	56	58	52	45	4	44	21	25	51	23	15	39	12	6	7	30	7	45	33	28	10	3	41	33	39	41	31	38	18	21	28	989	27.4722	1
CACTGTACTCCAGCCTGGGCAACATAGCGAGACCCCGTCTCT_ssc-miR-1285	11	3	6	36	36	24	14	2	9	2	84	1	10	6	3	16	12	15	4	1	14	12	13	0	5	2	7	8	3	14	10	92	27	22	12	12	548	15.2222	0
CACTGTACTCCAGCCTGGGCAACATAGCGAGACCCCGTCTCTA_ssc-miR-1285	41	16	24	70	72	70	29	9	17	1	190	9	32	8	10	46	19	45	41	18	26	49	35	1	18	2	38	39	10	27	23	212	84	29	42	22	1424	39.5556	1
CACTGTACTCCAGCCTGGGCAACATAGCGAGACCCCGTCTCTC_ssc-miR-1285	6	4	8	83	14	31	55	20	33	3	74	3	36	21	9	15	45	30	32	3	55	8	54	1	18	4	9	41	25	35	20	58	47	22	16	25	963	26.75	1
CACTGTACTCCAGCCTGGGCAACATAGCGAGACCCCGTCTCTT_ssc-miR-1285	89	29	63	245	166	140	186	63	127	30	400	14	92	140	124	163	122	351	234	51	224	58	199	14	149	26	109	199	61	136	103	410	173	84	136	96	5006	139.056	1
CACTGTACTCCAGCCTGGGCAACATAGCGAGACCCCGTCTCTTA_ssc-miR-1285	59	16	24	101	69	69	22	12	28	5	192	12	16	24	17	55	13	74	27	32	46	29	34	2	24	4	37	38	16	30	32	213	82	42	25	12	1533	42.5833	1
CACTGTACTCCAGCCTGGGCAACATAGCGAGACCCCGTCTCTTT_ssc-miR-1285	17	4	4	24	24	24	8	5	16	7	51	1	15	14	15	16	7	27	28	4	17	10	19	1	13	3	5	23	12	24	12	76	17	14	18	19	594	16.5	0
CACTTGTCCCGGCCTGT_ssc-miR-92a	9	9	12	53	19	16	46	27	18	21	27	5	14	21	27	16	33	15	18	11	25	5	25	14	32	27	13	35	20	17	13	52	15	8	42	16	776	21.5556	1
CAGACTGATGTTGAC_bta-miR-21-5p	17	25	4	57	39	12	100	14	15	83	50	9	20	48	82	66	50	50	36	21	23	5	43	25	102	89	21	42	32	44	19	70	10	14	95	32	1464	40.6667	1
CAGCAGCAATTCATGTTTTGA_ssc-miR-424-5p	8	13	21	5	38	49	10	30	7	13	40	123	5	9	14	20	9	16	5	43	4	20	10	35	18	8	9	7	9	18	9	22	51	15	7	7	727	20.1944	1
CAGCAGCAATTCATGTTTTGAA_ssc-miR-424-5p	23	79	59	14	138	126	24	75	48	34	110	310	11	22	74	45	17	56	9	154	15	98	41	109	92	40	25	33	40	74	12	88	103	38	42	22	2300	63.8889	1
CAGCAGCAATTCATGTTTTGAAA_ssc-miR-424-5p	7	17	17	2	23	23	3	7	0	9	17	47	2	3	9	11	4	12	1	32	1	20	8	21	11	6	6	5	11	13	3	19	30	8	2	5	415	11.5278	0
CAGCAGCAATTCATGTTTTGAAC_ssc-miR-424-5p	2	2	10	16	27	28	6	8	5	11	15	16	9	9	3	6	2	14	1	14	2	10	10	14	7	6	4	6	12	16	11	9	12	2	4	9	338	9.38889	0
CAGCATTGTACAGGGCTATGA_ssc-miR-103	9	13	14	6	20	15	9	18	5	5	18	28	3	10	6	9	4	14	6	27	5	19	6	13	14	7	4	2	5	16	7	9	18	5	12	5	386	10.7222	0
CAGCTCATCAGACTGATGTTGAC_hsa-mir-21	5	31	11	34	39	26	59	18	12	19	60	57	16	14	41	32	19	29	12	26	9	20	15	26	33	25	11	21	26	38	12	36	26	11	28	23	920	25.5556	1
CAGCTCGGTCTGAGGCCCCTCAGC_ssc-miR-423-3p	7	8	3	29	7	15	22	19	13	10	18	12	8	9	14	4	17	11	8	5	15	1	4	16	12	7	4	26	12	17	8	20	28	7	9	13	438	12.1667	0
CAGCTCGGTCTGAGGCCCCTCAGT_ssc-miR-423-3p	39	45	32	67	52	73	76	94	62	51	95	70	36	59	62	51	45	58	43	59	43	27	39	63	60	62	31	68	61	64	48	80	102	22	87	50	2076	57.6667	1
CAGCTTACCAGACTGATGTTGAC_hsa-mir-21	11	34	17	38	71	41	64	32	25	43	83	86	22	31	58	68	43	59	7	48	8	21	44	39	56	42	20	19	30	50	23	54	47	18	50	32	1434	39.8333	1
CAGCTTATCAGACCGATGTTGAC_hsa-mir-21	4	51	26	43	49	40	55	24	19	46	71	69	10	26	64	49	27	62	12	35	8	29	38	31	56	44	15	28	28	39	13	70	31	14	43	30	1299	36.0833	1
CAGCTTATCAGACTGACGTTGAC_hsa-mir-21	6	31	10	25	32	30	44	24	16	29	58	73	7	21	43	38	25	35	13	21	5	19	46	25	37	36	12	20	17	36	19	41	29	16	40	16	995	27.6389	1
CAGCTTATCAGACTGATG_hsa-mir-21	10	15	12	33	41	23	67	18	23	59	82	40	23	32	52	36	38	107	16	18	21	15	38	19	81	53	11	37	26	54	40	57	27	10	61	74	1369	38.0278	1
CAGCTTATCAGACTGATGCTGAC_hsa-mir-21	16	55	10	23	51	34	55	32	14	49	72	71	11	26	47	62	21	50	15	26	10	21	37	33	54	65	8	20	21	37	11	56	44	22	37	23	1239	34.4167	1
CAGCTTATCAGACTGATGT_hsa-mir-21	5	33	10	24	25	32	44	21	12	18	58	62	22	20	27	12	25	50	4	44	4	7	18	34	42	23	9	9	25	46	34	35	93	23	26	60	1036	28.7778	1
CAGCTTATCAGACTGATGTT_hsa-mir-21	11	17	12	14	14	16	45	11	7	12	38	36	24	12	10	2	17	53	3	18	4	6	10	16	23	9	5	8	19	27	22	10	61	12	34	56	694	19.2778	0
CAGCTTATCAGACTGATGTTA_hsa-mir-21	0	19	5	14	7	15	29	13	6	9	24	29	7	10	3	0	17	4	2	10	1	8	16	35	11	6	0	5	21	15	11	8	108	13	4	25	510	14.1667	0
CAGCTTATCAGACTGATGTTG_hsa-mir-21	48	486	124	137	297	226	406	160	94	198	610	782	101	188	162	101	218	258	25	432	46	183	114	236	439	235	45	87	193	280	144	215	819	189	156	254	8688	241.333	1
CAGCTTATCAGACTGATGTTGA_hsa-mir-21	80	774	213	109	422	369	351	223	137	189	766	1234	128	197	198	114	159	286	25	567	35	295	148	280	438	220	62	93	230	354	183	249	1191	271	120	301	11011	305.861	1
CAGCTTATCAGACTGATGTTGAA_hsa-mir-21	29	223	54	132	85	224	348	153	90	86	254	277	86	146	101	74	179	72	31	107	50	62	154	152	162	87	28	105	120	256	93	125	344	184	73	142	4888	135.778	1
CAGCTTATCAGACTGATGTTGAC_hsa-mir-21	3419	12621	5232	9817	17004	12643	18977	7751	6382	12156	22416	23231	4597	8639	17678	15996	10773	14201	4556	11080	3563	7211	9940	10259	16044	12925	4486	7509	8189	13940	4993	16681	12720	5874	14348	7737	395588	10988.6	1
CAGCTTATCAGACTGATGTTGACA_hsa-mir-21	284	1466	449	466	1087	869	1024	607	388	557	1484	2278	265	489	926	732	538	775	243	812	228	598	545	654	855	557	269	348	562	838	335	805	1231	450	556	431	25001	694.472	1
CAGCTTATCAGACTGATGTTGACC_hsa-mir-21	90	351	184	406	485	427	717	314	207	297	547	568	221	453	317	306	428	481	162	190	177	205	457	353	424	280	134	295	287	460	307	446	411	213	495	339	12434	345.389	1
CAGCTTATCAGACTGATGTTGACG_hsa-mir-21	17	91	23	28	53	56	55	45	121	29	76	92	17	182	48	28	224	37	13	37	85	33	40	44	45	27	8	25	33	40	28	32	83	35	28	61	1919	53.3056	1
CAGCTTATCAGACTGATGTTGACT_hsa-mir-21	177	1017	307	724	824	999	1581	553	482	542	1213	1308	442	774	704	585	790	638	208	496	299	347	841	726	873	609	209	546	576	960	502	721	1127	558	628	748	24634	684.278	1
CAGCTTATCAGACTGATGTTGAG_hsa-mir-21	3	11	2	7	12	22	22	11	30	4	14	4	11	42	7	3	91	5	1	5	26	4	16	15	11	4	2	8	18	17	6	8	21	13	2	12	490	13.6111	0
CAGCTTATCAGACTGATGTTGAT_hsa-mir-21	171	842	319	2127	614	2401	4258	1371	1005	495	1657	1163	982	1623	608	623	2217	537	321	399	645	284	2036	1847	1187	536	192	1502	1444	2543	1254	1297	2503	1526	647	1539	44715	1242.08	1
CAGCTTATCAGACTGGTGTTGAC_hsa-mir-21	16	61	19	45	75	54	87	28	33	58	91	89	22	30	74	64	30	59	17	41	9	31	43	38	83	66	20	32	24	56	23	79	44	30	55	41	1667	46.3056	1
CAGCTTATCAGGCTGATGTTGAC_hsa-mir-21	17	45	21	36	55	40	76	27	17	59	88	86	14	33	56	48	42	45	16	48	16	25	32	33	59	51	13	20	27	49	16	65	44	24	57	24	1424	39.5556	1
CAGCTTATCGGACTGATGTTGAC_hsa-mir-21	9	50	16	33	86	61	76	35	16	40	102	100	27	31	87	70	40	55	17	50	22	27	33	40	63	56	15	32	37	56	10	58	59	24	55	37	1625	45.1389	1
CAGCTTGTCAGACTGATGTTGAC_hsa-mir-21	6	19	6	13	21	22	35	15	7	21	25	40	8	10	27	31	12	20	7	12	5	8	13	14	30	11	9	11	22	17	8	18	17	10	30	19	599	16.6389	0
CAGGCTCAGTCCCCTCCCGAT_bta-miR-484	44	36	51	39	48	88	50	68	40	23	76	117	15	36	31	25	23	60	25	63	26	28	36	73	43	16	35	59	39	32	51	74	137	34	30	30	1701	47.25	1
CAGGGTCGGGCCTGGT_hsa-mir-7641-2	13	28	15	55	23	23	72	18	30	60	41	25	37	87	43	15	52	34	107	16	73	10	25	31	60	54	10	47	20	51	45	25	25	9	64	27	1370	38.0556	1
CAGTGCAATGTTAAAAGGGCA_ssc-miR-130a	12	58	46	9	37	18	26	28	6	29	17	41	9	24	25	19	7	16	12	47	6	16	7	15	18	15	1	13	23	31	6	23	48	4	21	7	740	20.5556	1
CAGTGCAATGTTAAAAGGGCATA_ssc-miR-130a	16	22	23	19	25	35	14	21	20	25	25	83	6	16	30	26	8	13	13	26	11	11	8	15	13	11	6	8	10	22	17	36	24	4	19	6	687	19.0833	0
CAGTGCACTACAGAACTTTGA_ssc-miR-148a-3p	9	49	18	32	27	42	81	62	40	8	63	80	16	52	31	15	32	15	5	24	14	15	20	51	22	4	8	16	29	91	34	27	98	40	9	31	1210	33.6111	1
CAGTGCACTACAGAACTTTGC_ssc-miR-148a-3p	81	221	119	476	195	438	692	427	248	203	497	491	251	365	357	280	469	280	85	192	130	162	481	375	332	284	107	302	449	603	330	485	663	219	354	314	11957	332.139	1
CAGTGCACTACAGAACTTTGG_ssc-miR-148a-3p	8	49	13	12	19	31	42	26	95	9	23	49	11	148	14	14	199	12	6	25	68	7	26	35	37	20	6	10	14	41	13	25	53	23	6	38	1227	34.0833	1
CAGTGCACTACAGAACTTTGT_ssc-miR-148a-3p	494	1687	761	1433	1592	1859	2465	1659	1104	1182	2575	3831	812	1423	2031	1677	1580	1484	581	1215	463	738	1590	1526	1522	1692	621	1126	1712	2396	1149	2221	2612	974	1752	1217	54756	1521	1
CAGTGCACTACAGAACTTTGTA_ssc-miR-148a-3p	8	34	16	17	45	26	29	29	13	24	45	98	16	29	40	36	19	30	17	22	5	10	24	25	32	39	16	27	23	48	9	40	42	8	40	16	997	27.6944	1
CAGTGCATCACAGAACTTTGC_ssc-miR-148b-3p	2	11	1	16	17	23	24	19	11	8	27	56	3	9	14	10	11	16	3	12	5	6	19	11	9	7	9	13	11	20	12	13	35	18	10	11	502	13.9444	0
CAGTGCATCACAGAACTTTGT_ssc-miR-148b-3p	19	116	35	41	75	116	71	80	40	36	91	371	23	40	81	56	48	75	20	74	20	46	67	76	72	37	26	38	51	102	39	90	119	77	44	49	2461	68.3611	1
CAGTGCATCACAGAACTTTGTA_ssc-miR-148b-3p	13	33	31	17	22	25	27	20	17	13	43	100	6	14	28	26	11	27	13	25	6	12	16	20	23	14	11	15	18	27	9	32	35	18	15	7	789	21.9167	1
CAGTGCATCACAGAACTTTGTT_ssc-miR-148b-3p	4	60	7	15	36	45	41	26	19	15	22	111	8	17	28	36	33	25	8	24	2	14	25	19	41	15	12	18	26	44	16	43	40	21	22	18	956	26.5556	1
CAGTGCATGACAGAACTTGG_ssc-miR-152	9	19	22	15	16	20	14	12	3	10	20	31	1	6	40	19	8	16	1	24	6	7	7	11	12	3	8	5	9	16	8	44	14	5	12	10	483	13.4167	0
CAGTGCATGACAGAACTTGGT_ssc-miR-152	2	18	12	26	28	34	44	22	7	17	38	18	3	19	60	58	11	27	3	18	8	20	26	21	22	12	7	23	10	22	9	69	38	20	21	22	815	22.6389	1
CAGTGGTTTTACCCTATGGT_hsa-miR-140-5p	4	13	7	7	15	32	10	9	5	12	23	54	4	6	5	8	4	15	1	14	4	9	11	14	10	5	3	7	4	18	11	16	33	9	5	12	419	11.6389	0
CAGTGGTTTTACCCTATGGTAA_ssc-miR-140-5p	5	21	9	9	14	25	7	20	5	4	20	52	7	8	5	4	6	8	3	11	2	11	13	18	8	7	3	10	11	12	15	13	42	12	2	5	427	11.8611	0
CAGTGGTTTTACCCTATGGTAG_ssc-miR-140-5p	112	261	188	100	349	294	126	204	112	137	338	699	65	154	174	116	90	247	32	339	44	304	127	270	166	103	82	112	125	249	91	272	326	102	149	138	6797	188.806	1
CATAGCCACTGTACTCCAGCCTGGGCAACATAGCGAGACCCCGTCTCTT_ssc-miR-1285	25	18	16	9	40	34	11	23	24	11	16	10	40	37	14	17	28	75	48	21	36	9	77	5	37	8	34	56	22	33	46	22	20	24	37	41	1024	28.4444	1
CATCAGACTGATGTTGAC_hsa-mir-21	4	6	9	35	15	12	71	11	13	43	41	9	18	24	53	56	51	35	21	6	10	3	26	11	66	62	6	33	15	35	15	64	6	6	57	24	972	27	1
CATCTTACCGGACAGTGCT_hsa-miR-200a-5p	4	11	5	15	16	26	43	6	11	13	17	24	11	10	27	11	18	13	6	13	7	2	13	10	12	20	0	9	7	14	18	23	30	2	15	5	487	13.5278	0
CATCTTACCGGACAGTGCTG_hsa-miR-200a-5p	3	12	10	21	14	14	36	6	8	25	20	27	15	16	24	17	13	16	6	24	7	7	12	7	33	30	0	3	12	14	3	20	17	5	32	7	536	14.8889	0
CATCTTACCGGACAGTGCTGG_hsa-miR-200a-5p	31	91	65	124	112	114	154	78	133	101	243	284	101	179	215	166	149	102	31	152	58	54	93	99	159	148	49	44	69	139	89	172	230	50	154	71	4303	119.528	1
CATCTTACCGGACAGTGCTGGA_hsa-miR-200a-5p	374	1234	334	1205	1492	1370	1680	669	937	1033	2402	3758	828	1001	3003	2460	1165	1161	384	1145	287	595	1106	857	1345	1966	562	843	543	1075	691	1874	1703	349	2196	484	44111	1225.31	1
CATCTTACCGGACAGTGCTGGAA_hsa-miR-200a-5p	36	124	39	110	117	109	182	47	59	101	190	293	73	85	213	235	130	110	24	108	25	54	106	73	145	215	37	65	54	98	53	169	179	27	164	40	3889	108.028	1
CATCTTACCGGACAGTGCTGGAT_hsa-miR-200a-5p	2	16	6	14	18	22	36	9	6	14	21	33	10	10	39	24	17	11	3	11	7	5	21	17	10	36	1	4	6	19	17	28	23	9	28	9	562	15.6111	0
CATCTTACCGGACAGTGCTGGG_hsa-miR-200a-5p	3	30	3	20	27	24	32	20	86	10	34	35	21	109	27	15	172	10	1	26	34	6	22	14	26	20	4	17	9	22	12	16	36	10	29	17	999	27.75	1
CATCTTACCGGACAGTGCTGGT_hsa-miR-200a-5p	2	14	5	34	19	28	49	20	27	17	21	44	35	26	17	17	34	13	3	13	10	5	32	18	29	16	10	18	15	28	20	21	49	11	25	15	760	21.1111	1
CATCTTACTGGGCAGCATTGG_hsa-miR-200b-5p	69	168	83	101	163	212	146	59	126	100	247	292	60	162	175	80	112	107	51	209	60	128	55	84	110	110	41	50	53	117	88	194	302	44	167	47	4372	121.444	1
CATCTTACTGGGCAGCATTGGA_hsa-miR-200b-5p	174	356	150	250	278	320	275	166	222	194	532	685	117	217	500	215	190	237	136	396	113	209	120	176	240	235	94	170	127	220	152	349	670	91	317	89	8982	249.5	1
CATCTTACTGGGCAGCATTGGAA_hsa-miR-200b-5p	3	34	5	9	12	17	16	1	4	7	28	32	6	9	18	2	14	10	16	16	2	12	5	9	12	8	3	1	6	5	4	24	36	1	5	0	392	10.8889	0
CATGACACGATCACTCCCGTTGAGT_bta-miR-425-5p	5	30	7	24	23	39	23	19	18	8	29	57	5	18	12	14	14	19	10	15	13	13	13	12	13	8	2	23	15	22	14	21	30	7	15	8	618	17.1667	0
CATGCCTTGAGTGTAGGACCA_ssc-miR-532-5p	11	25	9	25	9	19	27	31	19	12	30	58	12	12	9	19	24	6	0	19	8	8	11	16	14	13	1	15	17	32	7	19	50	23	18	9	637	17.6944	0
CATGCCTTGAGTGTAGGACCG_ssc-miR-532-5p	59	247	142	135	180	157	211	143	150	166	344	503	49	112	211	168	160	146	75	224	84	116	91	157	222	175	88	130	131	183	76	200	252	80	176	104	5847	162.417	1
CATGCCTTGAGTGTAGGACCGA_ssc-miR-532-5p	7	31	14	67	23	68	102	43	39	32	81	49	27	42	18	19	67	12	9	40	28	7	50	50	41	20	15	66	56	65	27	33	134	52	28	62	1524	42.3333	1
CATGCCTTGAGTGTAGGACCGC_ssc-miR-532-5p	97	290	179	920	275	528	1111	639	431	312	774	383	330	446	370	349	747	301	146	273	327	141	551	462	543	366	165	675	461	783	399	569	864	354	483	505	16549	459.694	1
CATGCCTTGAGTGTAGGACCGG_ssc-miR-532-5p	11	49	26	39	31	37	60	49	160	22	64	44	12	218	20	21	358	22	8	23	161	13	40	26	71	18	9	25	22	60	15	17	59	26	24	43	1903	52.8611	1
CATGCCTTGAGTGTAGGACCGT_ssc-miR-532-5p	604	1990	1250	2620	2184	2327	4012	2243	1818	1805	3952	3151	1064	1729	2475	1942	2336	1694	825	1780	1182	922	1988	1911	2758	2039	1047	2123	1666	3019	1420	2664	3475	1380	2514	1770	73679	2046.64	1
CATGCCTTGAGTGTAGGACCGTA_ssc-miR-532-5p	6	32	11	11	16	16	17	16	10	4	26	54	5	11	14	14	7	12	4	18	2	13	7	10	16	11	4	9	7	10	9	11	34	5	9	7	468	13	0
CATGCCTTGAGTGTAGGACCGTT_ssc-miR-532-5p	2	25	7	3	12	12	28	5	9	6	32	19	2	6	9	3	11	7	1	7	3	9	9	6	9	7	3	2	7	16	7	6	26	9	10	16	351	9.75	0
CATGCCTTGAGTGTAGGACCT_ssc-miR-532-5p	5	3	6	13	1	16	19	20	8	1	11	5	2	8	5	4	25	1	3	2	12	0	11	13	7	2	1	28	10	12	14	6	22	12	2	8	318	8.83333	0
CATGTCCGCGGGTTCCCTATCC_ssc-miR-7134-5p	9	24	10	17	9	11	16	27	18	7	22	42	0	11	16	13	15	12	6	24	6	10	9	10	14	12	14	12	12	11	4	17	26	6	15	13	500	13.8889	0
CATGTGATGAAGCAAATCAGTATGAATAAAGTCGTGATACTGTAAACGCTTTCTGATG_hsa-miR-3607-3p	1	8	1	15	1	1	2	4	5	23	5	6	8	3	3	28	15	22	26	2	0	5	17	1	13	6	29	11	20	3	9	38	5	22	34	15	407	11.3056	0
CATTGCACTTGTCTCGGTCT_bta-miR-25	8	28	14	16	27	48	38	33	15	10	41	33	18	28	18	11	8	42	4	24	6	13	18	24	22	10	8	12	32	23	23	21	53	24	27	44	824	22.8889	1
CATTGCACTTGTCTCGGTCTG_bta-miR-25	76	229	165	121	259	196	181	134	134	156	310	482	75	178	275	165	121	267	82	202	71	143	108	140	228	141	79	109	135	264	94	226	257	89	243	128	6263	173.972	1
CATTGCACTTGTCTCGGTCTGA_bta-miR-25	342	1016	830	248	990	1191	422	784	330	321	1049	2671	159	424	591	550	229	586	122	978	190	713	335	518	437	342	265	268	438	608	314	773	1422	384	407	315	21562	598.944	1
CATTGCACTTGTCTCGGTCTGAA_bta-miR-25	36	78	81	38	94	96	57	81	39	28	105	248	14	49	94	61	29	56	33	68	17	89	36	60	66	26	16	33	60	73	30	72	109	38	48	38	2196	61	1
CATTGCACTTGTCTCGGTCTGAAA_bta-miR-25	65	86	68	90	106	68	102	110	62	93	190	184	25	94	187	94	70	114	111	91	51	59	45	63	110	81	41	82	67	92	48	123	95	33	119	42	3161	87.8056	1
CATTGCACTTGTCTCGGTCTGAAAA_bta-miR-25	6	11	10	20	20	7	22	16	10	23	29	36	6	11	22	17	13	15	17	9	6	7	7	2	24	26	7	13	11	16	3	23	10	10	30	6	521	14.4722	0
CATTGCACTTGTCTCGGTCTGAAT_bta-miR-25	12	29	13	13	15	19	37	24	21	22	26	18	11	31	12	17	18	7	17	10	12	15	23	20	12	22	5	16	18	23	19	15	37	27	29	19	684	19	0
CATTGCACTTGTCTCGGTCTGAC_bta-miR-25	3	9	10	19	11	18	19	18	6	8	16	16	7	15	14	4	16	9	5	8	5	6	13	17	22	11	5	12	20	18	15	20	21	11	17	11	455	12.6389	0
CATTGCACTTGTCTCGGTCTGAT_bta-miR-25	10	68	22	39	35	57	67	26	23	19	66	59	20	48	37	22	36	26	19	30	11	21	22	44	64	32	12	26	35	55	35	39	94	34	37	44	1334	37.0556	1
CATTGCACTTGTCTCGGTCTGC_bta-miR-25	5	16	10	23	17	22	25	15	15	14	28	17	7	13	8	10	13	12	7	7	12	25	20	29	18	10	6	22	15	22	14	11	46	14	11	26	585	16.25	0
CATTGCACTTGTCTCGGTCTGG_bta-miR-25	3	30	18	1	10	27	7	10	33	2	14	37	2	59	7	3	34	6	4	14	25	13	5	2	12	5	6	4	6	12	9	3	18	5	4	15	465	12.9167	0
CATTGCACTTGTCTCGGTCTGT_bta-miR-25	27	118	48	54	98	121	99	80	46	22	94	106	39	83	45	47	36	52	17	60	16	53	67	71	59	40	23	31	53	97	54	55	185	57	65	70	2288	63.5556	1
CCACAGGGTAGAACCACGGA_ssc-miR-140-3p	7	29	6	12	20	19	26	14	9	10	23	23	6	11	11	15	11	31	3	22	3	11	13	7	24	14	6	6	9	22	10	10	14	7	13	17	494	13.7222	0
CCACAGGGTAGAACCACGGAC_ssc-miR-140-3p	18	47	16	32	63	52	51	53	13	18	62	96	16	32	52	50	22	62	21	48	14	26	27	58	53	33	17	36	24	45	27	53	35	29	42	32	1375	38.1944	1
CCACAGGGTAGAACCACGGACA_ssc-miR-140-3p	11	23	10	7	22	12	10	15	5	6	19	45	5	6	10	9	2	16	4	16	4	20	10	12	8	7	5	6	12	16	10	8	16	7	9	5	408	11.3333	0
CCACCTCCCCTGCAAACGTCC_ssc-miR-1306-5p	16	27	20	6	16	22	12	22	13	20	27	41	7	13	27	5	8	8	8	19	17	11	7	10	11	4	5	10	13	10	7	20	38	4	14	8	526	14.6111	0
CCACCTCCCCTGCAAACGTCCA_ssc-miR-1306-5p	64	158	58	32	76	69	41	83	52	29	91	195	16	38	58	43	15	59	35	106	31	58	33	47	49	25	41	24	47	44	28	60	109	13	30	23	1980	55	1
CCACGTTGGGCGCCA_ssc-mir-4335	70	284	30	115	51	40	57	26	18	20	80	81	25	31	28	13	2	25	175	35	61	32	32	33	51	17	8	17	18	34	20	22	29	8	59	20	1667	46.3056	1
CCACTGTACTCCAGCCTGGGC_ssc-mir-1285	1	14	3	37	11	6	47	5	5	22	22	3	7	9	14	16	10	10	67	5	35	1	7	7	35	11	11	19	13	14	11	26	2	1	12	9	528	14.6667	0
CCACTGTACTCCAGCCTGGGCAACATAGCGAGACCCCGTCTCTT_ssc-miR-1285	15	17	12	29	21	21	20	12	17	2	58	13	17	18	14	16	10	36	15	16	10	12	18	2	10	2	19	16	9	15	21	46	22	15	19	22	637	17.6944	0
CCACTTCTGACACCA_bta-miR-2478	133	362	52	29	47	46	83	36	37	53	118	93	22	30	69	37	15	56	709	81	182	27	25	59	75	34	20	44	22	37	23	46	41	7	48	16	2814	78.1667	1
CCAGCCTGACCTCTG_ssc-mir-6782	0	23	44	38	1	1	48	1	0	22	0	1	0	0	3	1	36	4	1	51	12	0	0	0	46	56	1	0	16	7	0	0	31	25	0	1	470	13.0556	0
CCAGCCTGGGCAACATAGCGAGACCCCGTCTCTT_ssc-miR-1285	11	6	6	7	29	25	10	13	25	2	23	2	8	21	9	5	7	19	7	16	23	9	13	1	10	1	9	20	10	21	8	21	26	5	9	9	446	12.3889	0
CCATGTTTTAGTAGA_ENSSSCG00000018952	6	11	5	31	24	13	51	13	20	54	48	20	13	28	86	53	24	51	27	16	12	7	12	15	58	70	19	41	17	31	16	66	0	7	115	19	1099	30.5278	1
CCCACGTTGGGCGCCA_ssc-mir-4335	28	201	24	36	24	27	20	16	8	9	56	83	15	17	9	5	6	19	40	38	35	35	18	30	22	5	8	12	15	28	18	15	15	4	21	15	977	27.1389	1
CCCACTTCTGACACC_bta-miR-2478	33	20	2	10	10	12	31	9	7	10	44	38	8	8	16	7	6	16	89	18	28	5	15	22	36	23	2	13	1	12	7	15	17	3	16	8	617	17.1389	0
CCCACTTCTGACACCA_bta-miR-2478	102	186	38	35	65	56	101	44	40	33	208	199	27	24	70	39	26	72	542	81	110	47	35	73	86	45	13	47	27	52	27	64	55	14	52	23	2758	76.6111	1
CCCCACGTTGGGCGCCA_ssc-mir-4335	7	116	11	7	13	23	11	11	5	2	22	81	8	13	12	3	1	9	9	26	8	23	15	9	8	4	2	3	8	10	5	4	15	2	9	4	519	14.4167	0
CCCCAGGTGTGATTCTGATTTGC_ssc-miR-361-3p	8	27	10	17	16	18	19	17	12	28	27	32	19	19	32	35	19	26	15	7	6	8	17	8	18	15	9	14	9	7	7	30	12	3	28	10	604	16.7778	0
CCCCCAGGTGTGATTCTGATTTGC_ssc-miR-361-3p	53	114	55	117	138	83	134	105	80	128	158	214	69	85	221	158	94	167	44	45	23	34	82	60	108	80	50	74	51	50	40	118	84	22	142	53	3333	92.5833	1
CCCCCAGGTGTGATTCTGATTTGT_ssc-miR-361-3p	2	27	7	43	14	34	79	33	32	23	43	25	32	32	26	20	47	25	8	9	7	7	43	35	13	11	9	30	20	12	26	31	28	18	16	37	904	25.1111	1
CCCCGACTGGAAGCT_ssc-miR-30d	5	10	1	123	33	14	133	27	35	81	58	2	19	36	74	51	96	30	54	15	45	4	45	24	108	81	26	89	35	46	33	82	14	12	86	31	1658	46.0556	1
CCCTGAGACCCTAACTTGTGA_ssc-miR-125b	1	49	6	8	12	8	46	9	6	11	26	39	7	12	3	3	7	13	1	21	1	5	2	5	49	19	3	6	10	8	12	4	60	13	8	18	511	14.1944	0
CCCTGAGACCCTTTAACCTGT_ssc-miR-125a	4	77	20	21	21	9	84	18	15	11	46	29	16	20	7	2	27	17	8	34	14	12	8	18	47	15	2	5	18	12	26	21	127	19	17	32	879	24.4167	1
CCCTGAGACCCTTTAACCTGTG_ssc-miR-125a	8	147	33	8	32	28	33	24	11	17	66	96	17	29	10	9	11	19	0	40	6	24	6	24	29	8	13	4	15	22	33	22	101	23	7	32	1007	27.9722	1
CCCTGAGACCCTTTAACCTGTGA_ssc-miR-125a	13	25	11	11	14	9	10	17	6	4	28	20	3	4	6	1	5	7	7	16	5	8	2	6	7	12	5	5	6	9	6	9	44	11	7	6	365	10.1389	0
CCCTGTAGAACCGAATTTG_ssc-miR-10b	3	6	8	14	21	10	9	11	5	14	25	13	5	14	36	32	12	20	14	8	3	5	19	7	21	19	7	8	13	14	4	23	17	8	33	5	486	13.5	0
CCCTGTAGAACCGAATTTGTA_ssc-miR-10b	2	11	10	16	12	18	16	19	10	7	13	22	11	17	15	10	21	3	4	1	13	2	17	17	13	5	3	15	15	26	17	22	27	16	7	12	465	12.9167	0
CCCTGTAGAACCGAATTTGTG_ssc-miR-10b	56	214	117	160	284	205	185	148	95	227	284	334	76	200	475	380	204	242	139	150	119	130	203	162	199	189	88	138	159	217	105	426	142	99	376	109	7036	195.444	1
CCCTGTAGAACCGAATTTGTGC_bta-miR-10b	3	7	3	20	8	23	17	16	10	10	7	9	10	15	13	11	25	8	4	9	6	2	29	14	11	5	3	10	8	16	13	15	8	7	15	15	405	11.25	0
CCCTGTAGAACCGAATTTGTGT_bta-miR-10b	8	43	27	45	83	74	59	48	20	42	42	50	30	56	76	74	53	58	24	37	29	21	72	40	53	32	16	45	36	59	49	78	62	29	77	42	1689	46.9167	1
CCCTGTAGATCCGAATTTG_ssc-miR-10a-5p	2	48	6	13	12	6	38	5	14	15	35	19	6	11	12	11	41	11	3	14	4	10	8	6	50	36	2	5	18	16	8	15	38	26	14	21	599	16.6389	0
CCCTGTAGATCCGAATTTGC_ssc-miR-10a-5p	0	33	5	44	4	5	123	10	14	13	40	10	14	19	11	7	49	10	3	8	13	1	17	10	65	26	3	12	11	30	30	23	82	29	15	27	816	22.6667	1
CCCTGTAGATCCGAATTTGT_ssc-miR-10a-5p	10	244	32	109	49	35	471	45	43	87	182	88	68	85	37	33	182	61	14	74	34	23	43	48	263	115	16	38	77	123	95	57	283	102	73	137	3476	96.5556	1
CCCTGTAGATCCGAATTTGTA_ssc-miR-10a-5p	0	28	4	11	6	2	39	3	5	8	11	13	9	12	3	4	11	4	4	4	4	1	7	2	22	6	1	2	6	4	3	7	35	11	2	10	304	8.44444	0
CCCTGTAGATCCGAATTTGTG_ssc-miR-10a-5p	8	429	45	72	109	47	376	64	50	134	317	191	49	151	101	87	161	71	16	122	35	46	63	52	326	235	44	38	76	123	80	101	253	94	87	155	4408	122.444	1
CCCTGTAGATCCGAATTTGTGA_bta-miR-10a	1	103	17	24	15	6	73	16	7	19	53	44	12	22	9	6	38	18	1	31	6	11	8	9	62	35	1	5	25	15	16	16	86	40	11	49	910	25.2778	1
CCCTGTAGATCCGAATTTGTGT_bta-miR-10a	3	144	15	30	27	22	166	11	25	27	72	40	26	45	15	7	72	16	6	24	11	10	21	24	96	60	7	15	36	48	42	24	99	43	22	67	1418	39.3889	1
CCCTGTCCTCCAGGAGCTCAC_ssc-miR-339-5p	16	24	7	5	36	46	6	26	5	12	49	127	9	16	16	17	8	30	2	36	2	33	18	37	17	12	6	14	13	16	18	29	63	10	14	14	809	22.4722	1
CCGCACTGTGGGTACTTGCT_hsa-miR-106b-3p	4	7	12	8	13	14	23	13	7	7	26	36	2	15	12	13	8	12	2	17	6	13	6	16	8	9	2	11	13	19	12	14	29	8	12	14	443	12.3056	0
CCGCACTGTGGGTACTTGCTG_hsa-miR-106b-3p	55	164	130	73	170	157	109	150	88	104	186	281	56	118	158	92	74	103	45	181	43	105	93	88	100	78	50	69	90	138	57	96	149	66	117	77	3910	108.611	1
CCGCACTGTGGGTACTTGCTGCA_hsa-miR-106b-3p	13	16	15	20	15	11	17	18	15	21	29	40	8	16	23	14	11	16	13	13	5	9	11	13	20	13	6	17	6	20	7	20	12	2	19	11	535	14.8611	0
CCGTCCTAAGGTTGTTGAGTT_ssc-miR-676-3p	31	28	30	28	25	24	44	36	23	10	58	33	13	29	11	19	32	10	7	14	5	13	14	17	22	11	13	17	12	20	9	13	53	13	10	21	768	21.3333	1
CCGTCCTAAGGTTGTTGAGTTT_ssc-miR-676-3p	18	27	22	24	28	21	54	22	42	13	50	19	19	35	13	14	30	14	7	12	3	6	6	9	45	13	6	3	4	24	10	9	57	16	22	24	741	20.5833	1
CCTCCCACACCCAAGGCTTGCA_ssc-miR-532-3p	4	45	17	3	18	17	4	21	5	1	17	82	1	3	5	5	3	3	0	15	3	15	5	10	4	2	1	2	9	7	5	6	31	4	1	1	375	10.4167	0
CCTCCTGGGGCCCGCACTCTCG_ssc-miR-1343	13	20	10	16	8	6	7	13	6	6	13	18	0	6	10	4	6	2	16	8	10	5	1	4	17	11	14	12	4	8	1	6	26	5	10	4	326	9.05556	0
CCTCGGCGTGGCGTCGGTCGTG_hsa-mir-1307	23	76	39	28	43	31	32	29	25	47	57	107	13	36	49	34	30	26	23	44	34	16	22	25	56	50	23	40	32	34	18	54	44	14	48	13	1315	36.5278	1
CCTCGGCGTGGCGTCGGTCGTGA_hsa-mir-1307	8	34	20	19	12	11	34	32	23	12	43	69	14	13	15	11	28	20	7	17	12	10	21	25	20	4	10	22	32	27	21	29	34	13	26	15	763	21.1944	1
CCTCGGCGTGGCGTCGGTCGTGG_hsa-mir-1307	101	380	149	193	258	219	249	212	228	203	418	536	98	215	339	271	166	260	129	167	146	120	162	164	285	184	163	225	154	211	137	327	227	91	288	125	7800	216.667	1
CCTCGGTTGGCCTCG_ENSSSCG00000025162	37	38	40	49	56	20	47	30	40	99	115	12	38	83	92	35	61	71	131	21	90	11	90	24	123	95	55	105	44	79	51	74	35	16	93	25	2125	59.0278	1
CCTCGGTTGGCCTCGG_ENSSSCG00000025162	15	13	19	25	41	17	29	24	29	43	61	10	20	62	30	14	22	24	48	10	48	6	40	13	53	26	27	34	20	22	29	41	13	11	37	21	997	27.6944	1
CCTGAACTAGGGGTCTGGAGT_ssc-miR-345-3p	7	31	6	19	10	13	42	21	32	9	48	58	9	12	27	14	11	19	14	20	5	1	11	7	26	15	4	16	9	16	8	18	49	14	10	19	650	18.0556	0
CCTGAGTGGCTCTAGTGATGAGCAAACTGAGCCTCTAAGAAGTTGACTGAAG_hsa-miR-3653-3p	3	4	0	12	2	2	4	2	0	14	6	2	7	5	12	19	18	26	20	2	7	1	9	0	35	35	9	18	5	5	7	17	1	6	32	12	359	9.97222	0
CCTGGACTTGGAGTCAGAAGG_bta-miR-378d	147	577	402	277	622	406	363	281	244	527	616	1016	125	299	535	463	306	488	147	548	186	275	230	326	517	418	159	269	320	643	177	513	382	153	437	236	13630	378.611	1
CCTGTACTCCAGCCTGGGCAACATAGCGAGACCCCGTCTCTA_ssc-miR-1285	15	3	9	28	31	30	5	3	3	0	88	0	9	0	5	15	5	10	9	3	11	27	11	0	9	0	12	13	3	6	10	86	35	16	8	2	520	14.4444	0
CCTGTACTCCAGCCTGGGCAACATAGCGAGACCCCGTCTCTT_ssc-miR-1285	35	8	24	79	51	61	38	20	28	2	186	4	21	18	35	41	26	62	41	20	30	27	32	3	25	1	26	43	12	49	19	180	100	36	24	31	1438	39.9444	1
CCTGTACTCCAGCCTGGGCAACATAGCGAGACCCCGTCTCTTA_ssc-miR-1285	13	3	4	33	19	26	5	6	5	1	58	3	7	8	6	14	2	14	11	9	5	20	9	2	5	2	7	9	3	9	5	73	32	9	9	5	451	12.5278	0
CCTGTGCCTTTTACCTCTTTAA_bta-mir-6529a	33	32	24	26	14	13	47	35	21	35	52	77	4	7	55	25	27	18	47	39	10	19	7	18	60	39	13	58	14	28	13	49	51	13	26	2	1051	29.1944	1
CCTTCATTCCACCGGAGTCTGA_ssc-miR-205	1	33	8	8	6	9	13	12	4	5	19	32	16	14	5	2	11	7	3	25	5	4	2	7	19	13	3	5	7	5	9	8	30	5	8	25	388	10.7778	0
CCTTCATTCCACCGGAGTCTGT_ssc-miR-205	3	18	8	4	2	2	9	4	3	2	11	21	10	10	1	1	7	10	1	5	0	5	2	6	10	4	2	2	1	8	12	6	24	15	3	20	252	7	0
CCTTGACTGGAAGCT_ssc-miR-30e-5p	6	15	6	73	34	36	73	12	23	47	54	2	29	46	51	38	44	36	12	8	29	6	39	26	84	45	18	65	25	49	39	77	12	17	57	25	1258	34.9444	1
CGAATCATTATTTGCTGCTCT_hsa-miR-15b-3p	13	6	19	5	10	20	3	31	17	20	25	61	3	11	16	10	9	8	1	34	1	28	16	29	9	2	11	13	16	24	6	17	62	9	8	9	582	16.1667	0
CGAATCATTATTTGCTGCTCTA_hsa-miR-15b-3p	10	12	5	4	10	12	0	18	2	3	7	54	1	6	11	5	5	3	3	15	2	20	0	14	1	3	4	2	5	5	0	7	28	5	2	3	287	7.97222	0
CGAGGGGCAGAGAGCGAGACT_hsa-mir-423	16	19	9	36	15	16	45	23	14	10	27	37	14	16	20	11	12	19	26	11	27	5	14	8	23	17	9	25	17	17	14	18	29	8	17	15	659	18.3056	0
CGAGGGGCAGAGAGCGAGACTT_hsa-mir-423	15	50	27	37	12	24	36	40	25	27	46	65	9	15	34	10	25	20	38	23	23	18	20	17	22	17	9	16	19	29	17	21	69	10	12	15	912	25.3333	1
CGAGGGGCAGAGAGCGAGACTTC_hsa-mir-423	11	6	7	47	5	9	43	28	12	6	16	8	5	15	8	5	17	7	39	4	20	1	8	16	20	4	2	33	13	17	14	14	40	15	7	9	531	14.75	0
CGAGGGGCAGAGAGCGAGACTTT_hsa-mir-423	101	82	82	155	54	58	182	136	81	82	133	98	32	73	132	56	85	94	180	67	94	49	39	61	117	75	47	104	79	83	41	123	201	44	89	57	3266	90.7222	1
CGATGATGGTCCCTGTGTTTG_ssc-miR-2320-3p	14	24	8	24	7	5	45	20	18	25	27	14	6	11	39	10	29	14	51	13	15	7	8	5	28	33	11	24	10	26	8	23	17	13	27	4	663	18.4167	0
CGATGATGGTCCCTGTGTTTGT_ssc-miR-2320-3p	21	8	8	18	16	14	36	28	15	19	22	22	6	15	34	11	11	11	24	10	14	8	6	13	25	20	9	26	18	17	7	25	31	13	20	9	610	16.9444	0
CGCACTGTGGGTACTTGCTG_hsa-miR-106b-3p	11	21	18	11	44	27	20	20	18	16	29	39	7	11	19	24	17	29	4	29	6	17	14	14	24	13	3	12	23	21	13	20	38	10	18	15	675	18.75	0
CGCATGTGATGAAGCAAATCAGTATGAATAAAGTCGTGATACTGTAAACGCTTTCTGATG_hsa-miR-3607-5p	2	6	2	12	3	3	1	1	0	28	6	5	5	2	3	36	16	24	24	2	5	4	13	1	14	11	11	16	25	2	8	32	3	11	25	8	370	10.2778	0
CGCGCCGGGCCCGGG_hsa-miR-3195	5	9	23	24	3	5	7	4	1	24	10	6	4	15	12	1	21	13	4	5	34	0	2	0	11	6	2	4	5	7	2	8	8	9	17	9	320	8.88889	0
CGCTCGGTCTGAGGCCCCTC_hsa-mir-423	35	39	43	74	52	29	68	59	58	61	94	83	20	37	94	59	53	63	51	65	37	28	39	45	81	60	39	87	46	58	29	89	83	26	78	22	1984	55.1111	1
CGCTCGGTCTGAGGCCCCTCAG_hsa-mir-423	15	43	24	26	28	23	23	31	23	24	59	69	12	31	56	18	21	44	13	50	16	24	12	19	46	29	16	19	29	34	13	33	47	13	33	14	1030	28.6111	1
CGCTCGGTCTGAGGCCCCTCAGC_hsa-mir-423	20	36	22	121	35	80	144	109	74	58	95	52	35	70	58	43	99	49	41	41	65	26	53	76	71	40	23	130	64	92	56	93	130	46	66	56	2369	65.8056	1
CGCTCGGTCTGAGGCCCCTCAGT_hsa-mir-423	151	310	238	396	336	382	498	420	335	333	558	499	170	312	438	263	284	322	213	323	245	191	242	356	383	301	151	471	318	383	243	487	608	187	333	232	11912	330.889	1
CGCTCGGTCTGAGGCCCCTCAGTA_hsa-mir-423	23	27	18	19	18	17	27	30	29	16	41	41	3	16	34	22	16	20	20	15	7	10	15	8	33	16	16	21	14	21	11	38	32	7	27	5	733	20.3611	1
CGGAAGACTAGTGATTTTGTT_hsa-mir-7-1	3	21	7	28	16	13	36	20	21	15	22	18	7	22	28	19	18	11	9	8	13	7	4	18	13	12	7	19	18	29	6	36	24	11	23	17	599	16.6389	0
CGGAAGACTAGTGATTTTGTTG_hsa-mir-7-1	58	72	52	64	83	92	86	87	50	72	105	192	37	68	79	70	66	77	40	96	42	55	34	43	80	75	34	63	60	105	39	90	140	51	72	43	2572	71.4444	1
CGGAAGACTAGTGATTTTGTTGC_hsa-mir-7-1	16	17	12	44	14	25	50	42	34	21	21	33	11	31	18	15	41	23	20	23	25	7	31	24	27	25	7	39	33	29	39	27	62	25	26	35	972	27	1
CGGAAGACTAGTGATTTTGTTGT_hsa-mir-7-1	62	128	96	125	114	205	189	195	119	93	195	298	64	114	104	98	116	96	60	157	77	100	113	99	127	106	82	130	123	208	77	124	248	117	141	104	4604	127.889	1
CGGAAGACTAGTGATTTTGTTGTA_hsa-mir-7-1	10	25	13	49	15	51	72	59	29	13	35	46	20	49	15	18	60	8	6	13	29	15	35	30	23	15	9	48	38	62	30	25	111	49	4	33	1162	32.2778	1
CGGAAGACTAGTGATTTTGTTGTC_hsa-mir-7-1	94	162	115	726	179	467	839	541	426	212	444	340	250	474	215	215	646	205	217	165	337	119	395	325	296	212	126	618	444	636	338	333	679	351	286	337	12764	354.556	1
CGGAAGACTAGTGATTTTGTTGTG_hsa-mir-7-1	6	18	7	14	13	28	23	24	114	6	14	21	5	158	10	8	173	6	7	9	94	7	14	14	30	9	4	28	17	39	22	17	41	20	10	26	1056	29.3333	1
CGGAAGACTAGTGATTTTGTTGTT_hsa-mir-7-1	717	1489	911	2251	1853	2072	2829	2108	1762	1433	2636	3166	767	1910	1914	1564	2030	1450	1224	1387	1037	861	1483	1321	1908	1528	905	2005	1566	2516	1097	1760	2621	1318	1844	1385	60628	1684.11	1
CGGAAGACTAGTGATTTTGTTGTTA_hsa-mir-7-1	30	47	28	26	41	39	31	43	36	24	72	134	21	33	39	27	26	38	24	38	15	36	19	27	38	20	22	29	49	44	18	28	95	38	40	23	1338	37.1667	1
CGGCTTATCAGACTGATGTTGAC_hsa-mir-21	10	45	18	48	61	37	47	25	16	62	70	59	21	38	55	101	46	64	27	34	7	20	63	24	84	70	27	43	48	49	38	106	47	33	73	36	1652	45.8889	1
CGGGGCGCGGCCGGA_hsa-mir-3178	31	13	67	33	15	11	22	6	19	34	65	32	9	34	10	4	28	110	20	44	61	11	8	11	28	15	14	13	16	21	21	18	56	14	43	41	998	27.7222	1
CGGTTGGCCTCGGATA_ENSSSCG00000025162	9	15	11	29	15	6	24	11	16	35	42	5	18	15	24	10	15	27	35	7	35	9	33	10	50	24	22	20	25	13	13	41	12	3	36	8	723	20.0833	1
CGTACCGTGAGTAATAATGCG_ssc-miR-126-3p	4	32	2	13	30	11	17	15	11	6	12	34	9	12	5	4	9	18	5	19	2	8	5	12	12	7	8	6	2	11	4	11	20	5	16	17	414	11.5	0
CGTCAACACTTGCTGGTTTCCTC_ssc-miR-505	17	31	27	7	20	24	14	30	14	7	35	83	6	13	16	11	3	16	6	23	6	20	9	19	12	4	7	7	13	25	7	13	34	8	11	10	608	16.8889	0
CGTCAACACTTGCTGGTTTCCTCT_ssc-miR-505	7	19	14	15	16	39	31	32	27	9	30	36	7	15	15	17	6	11	5	10	13	16	12	17	14	4	6	7	8	14	10	13	45	13	20	7	580	16.1111	0
CGTGGATGTACTTGCTTT_bta-mir-302a	7	3	4	34	7	4	46	15	13	17	15	2	12	16	39	14	21	13	15	5	13	2	6	5	19	23	12	27	7	19	11	33	3	1	35	8	526	14.6111	0
CTAAGTGCTTCCATGTTTTAGTAG_bta-miR-302b	36	54	39	20	45	47	28	46	21	30	47	109	10	26	79	31	6	40	22	63	13	36	7	32	40	22	17	22	19	29	19	61	53	7	39	10	1225	34.0278	1
CTAATACTGCCTGGTAATGATGAC_bta-miR-200b	11	12	2	15	16	20	14	8	13	8	40	36	3	19	27	21	17	14	5	22	5	10	12	2	11	15	8	7	8	11	10	18	31	7	23	5	506	14.0556	0
CTACAGTACTGTGATAACTGAA_ssc-miR-101	21	53	17	29	68	60	32	38	15	37	72	105	4	30	62	44	19	65	20	49	15	29	22	54	41	27	23	25	30	40	17	51	50	18	45	23	1350	37.5	1
CTAGACTGAAGCTCCTTG_ssc-miR-151-3p	5	33	21	28	27	15	66	13	17	34	45	47	6	11	34	22	23	29	10	17	15	10	24	20	42	31	16	24	27	41	14	33	19	12	29	7	867	24.0833	1
CTAGACTGAAGCTCCTTGA_ssc-miR-151-3p	6	27	9	18	29	18	44	22	12	21	54	44	10	26	43	29	14	36	14	24	11	16	11	14	47	31	8	9	13	31	8	38	26	6	32	17	818	22.7222	1
CTAGACTGAAGCTCCTTGAG_ssc-miR-151-3p	11	35	22	19	27	33	63	23	23	14	52	50	7	25	31	29	12	47	17	42	19	39	14	19	42	34	20	15	18	35	12	42	55	11	41	19	1017	28.25	1
CTAGACTGAAGCTCCTTGAGA_ssc-miR-151-3p	32	86	59	110	86	103	209	139	72	55	161	216	37	115	113	100	91	80	46	83	39	65	76	80	143	66	40	68	87	96	67	135	157	70	109	56	3347	92.9722	1
CTAGACTGAAGCTCCTTGAGC_ssc-miR-151-3p	15	24	8	36	42	21	52	26	6	15	51	51	12	17	52	37	28	37	26	28	4	20	18	18	41	39	21	15	11	16	17	55	23	14	46	17	959	26.6389	1
CTAGACTGAAGCTCCTTGAGG_ssc-miR-151-3p	565	1098	739	972	1376	1067	1320	942	799	786	1626	2220	321	1090	1952	1409	972	1412	733	885	495	690	623	740	1301	1064	648	669	721	887	547	1866	973	473	1558	532	36071	1001.97	1
CTAGACTGAAGCTCCTTGAGGA_ssc-miR-151-3p	289	601	419	569	794	591	859	546	464	526	948	1205	248	605	930	617	373	738	435	463	243	399	403	406	730	599	351	405	345	541	323	776	548	221	946	370	19826	550.722	1
CTAGACTGAAGCTCCTTGAGGAA_ssc-miR-151-3p	117	203	156	137	290	199	312	174	144	173	337	464	74	165	272	198	110	239	157	202	77	134	96	117	262	172	117	115	122	155	108	227	235	74	283	94	6511	180.861	1
CTAGACTGAAGCTCCTTGAGGAAA_ssc-miR-151-3p	48	121	50	83	148	74	138	82	83	103	164	209	37	101	173	101	81	120	86	75	57	47	66	55	126	93	65	64	60	83	46	101	65	32	123	36	3196	88.7778	1
CTAGACTGAAGCTCCTTGAGGAAT_ssc-miR-151-3p	5	26	12	25	23	14	33	23	12	13	38	22	12	30	15	5	21	15	9	9	9	8	20	11	26	13	5	6	23	20	20	12	40	16	17	8	616	17.1111	0
CTAGACTGAAGCTCCTTGAGGAT_ssc-miR-151-3p	10	28	11	19	26	23	52	18	7	10	29	12	15	31	11	10	23	9	5	10	7	7	18	12	25	8	8	20	7	20	12	12	34	13	19	16	597	16.5833	0
CTAGACTGAAGCTCCTTGAGGC_ssc-miR-151-3p	5	19	8	42	34	41	136	29	34	27	57	48	19	50	42	27	39	24	14	15	17	20	38	27	42	32	13	20	29	39	28	62	72	20	36	43	1248	34.6667	1
CTAGACTGAAGCTCCTTGAGGG_ssc-miR-151-3p	4	15	3	8	10	12	20	7	45	3	7	14	6	51	9	6	67	2	3	6	23	2	12	6	17	7	5	4	12	4	7	8	15	5	13	12	450	12.5	0
CTAGACTGAAGCTCCTTGAGGT_ssc-miR-151-3p	25	143	61	119	185	167	365	102	75	74	183	172	65	142	157	98	121	80	30	81	48	78	102	123	179	101	41	64	108	157	91	170	200	78	123	125	4233	117.583	1
CTAGACTGAAGCTCCTTGAGGTA_ssc-miR-151-3p	3	43	10	6	21	13	50	8	12	10	31	36	5	13	24	10	10	11	4	15	5	12	5	5	34	21	10	9	7	14	12	21	24	3	22	12	551	15.3056	0
CTAGACTGAAGCTCCTTGAGGTAT_ssc-miR-151-3p	0	33	9	6	10	4	48	6	13	4	25	21	6	11	3	2	13	4	1	2	3	5	2	7	26	11	1	5	7	5	7	12	20	7	10	23	372	10.3333	0
CTAGACTGAAGCTCCTTGAGT_ssc-miR-151-3p	16	61	27	66	51	62	148	49	57	37	79	85	44	69	58	46	51	59	28	20	25	26	79	67	91	53	21	32	30	89	47	64	106	32	49	73	1997	55.4722	1
CTAGCACCATCTGAAATCGGTC_ssc-miR-29a	2	8	3	14	4	10	62	16	10	4	19	13	8	5	6	4	16	5	1	10	2	2	10	10	17	6	0	6	11	15	12	10	38	11	7	19	396	11	0
CTAGCACCATCTGAAATCGGTT_ssc-miR-29a	2	80	19	37	52	47	211	51	29	22	113	109	24	32	32	25	58	41	1	60	4	22	22	40	172	59	4	20	42	82	48	39	176	44	13	55	1887	52.4167	1
CTAGCACCATTTGAAATCAGTG_ssc-mir-29b-2	9	23	10	2	27	32	18	9	3	15	27	75	1	11	19	9	10	14	2	26	3	17	9	13	24	11	2	13	7	27	5	17	19	4	6	14	533	14.8056	0
CTAGCACCATTTGAAATCAGTGT_ssc-miR-29b	8	29	12	9	26	33	33	22	18	4	53	72	4	13	10	14	16	19	9	27	9	26	27	24	32	7	9	12	11	40	12	24	39	17	18	16	754	20.9444	1
CTAGCTTATCAGACTGATGTTGAC_ssc-miR-21	23	110	61	113	164	113	153	79	56	136	195	209	33	94	205	155	82	134	50	101	34	75	103	95	152	152	40	78	61	133	50	123	144	51	132	73	3762	104.5	1
CTAGCTTATCAGACTGATGTTGAT_ssc-miR-21	0	10	1	23	5	22	48	17	12	10	18	17	11	23	7	2	14	1	4	6	4	1	25	20	10	5	1	18	13	22	7	17	19	12	6	11	442	12.2778	0
CTAGGCAGTGTAGTTAGCTGATT_bta-miR-34b	0	7	2	15	10	3	109	5	9	20	30	26	1	0	9	4	30	1	2	10	1	0	3	1	45	23	0	6	18	37	6	12	39	4	2	3	493	13.6944	0
CTAGTGATTTTGTTGTT_ssc-miR-7	16	6	7	44	19	22	58	27	23	26	32	5	22	31	36	13	26	24	14	12	23	7	22	20	35	20	20	45	26	37	18	40	12	10	24	18	840	23.3333	1
CTATACAACCTACTGCCTTCCT_hsa-let-7b-3p	0	21	0	17	10	9	47	1	6	12	35	12	12	10	5	2	18	7	1	6	5	4	4	7	33	23	3	12	13	17	9	6	38	9	6	13	433	12.0278	0
CTATACAATCTACTGTCTTTCT_bta-let-7a-3p	8	16	9	15	10	14	26	20	3	9	46	38	8	15	4	0	21	10	1	19	2	9	3	14	32	14	2	8	10	19	16	12	69	16	7	19	544	15.1111	0
CTATACGACCTGCTGCCTTTC_ssc-let-7d-3p	2	24	8	14	9	2	55	7	6	27	39	24	9	5	13	9	26	14	10	7	5	6	3	7	49	34	3	6	13	7	5	11	31	6	18	17	531	14.75	0
CTATCAGACTGATGTTGAC_hsa-mir-21	1	12	10	44	36	15	68	11	15	62	58	6	20	23	60	56	37	56	24	9	15	3	44	17	78	84	15	36	28	26	13	54	6	12	63	15	1132	31.4444	1
CTATTGCACTTGTCCCGGCCTGT_ssc-miR-92a	6	12	12	19	18	18	17	16	8	8	24	20	5	11	10	10	5	16	7	14	9	16	18	14	14	6	4	8	10	11	9	17	27	3	19	5	446	12.3889	0
CTCAAACTGTGGGGG_ssc-miR-371-5p	39	45	70	31	95	78	65	96	52	138	96	38	27	94	55	66	45	70	47	75	47	33	47	48	113	58	46	72	92	128	39	116	53	32	77	43	2366	65.7222	1
CTCAAACTGTGGGGGA_ssc-miR-371-5p	1	2	9	18	9	20	23	25	6	7	13	7	23	18	4	13	9	4	7	3	14	1	34	17	10	5	4	18	19	21	13	13	22	7	4	13	436	12.1111	0
CTCAAACTGTGGGGGC_ssc-miR-371-5p	156	144	241	280	502	372	315	375	230	390	517	173	215	422	440	440	244	437	219	250	260	189	477	261	446	342	297	326	399	405	262	643	235	91	535	212	11742	326.167	1
CTCAAACTGTGGGGGCA_ssc-miR-371-5p	50	74	110	90	242	205	95	150	83	119	299	91	68	144	122	190	83	150	47	138	66	108	166	125	127	79	109	107	139	160	104	276	134	64	166	91	4571	126.972	1
CTCAAACTGTGGGGGCAC_ssc-miR-371-5p	74	295	177	142	260	180	141	246	83	223	198	218	68	219	137	105	127	297	93	118	76	150	148	160	238	124	62	157	269	304	141	249	140	118	157	155	6049	168.028	1
CTCAAACTGTGGGGGCACA_ssc-miR-371-5p	17	46	35	38	37	58	31	97	28	22	35	53	32	79	12	15	43	27	21	19	14	28	53	57	19	11	8	37	54	65	56	43	63	46	15	45	1359	37.75	1
CTCAAACTGTGGGGGCACC_ssc-miR-371-5p	36	116	97	145	130	211	126	328	93	91	132	102	90	269	64	72	190	99	52	47	77	95	302	221	130	32	36	212	241	291	219	190	201	164	79	174	5154	143.167	1
CTCAAACTGTGGGGGCACCTT_hsa-miR-371a-5p	20	43	25	31	35	48	34	36	12	24	40	67	12	25	29	15	19	23	14	27	25	25	33	33	24	13	26	22	24	47	22	50	49	12	19	21	1024	28.4444	1
CTCAAACTGTGGGGGCACCTTC_hsa-miR-371a-5p	20	24	8	12	21	20	10	18	12	15	27	43	9	11	27	13	8	17	12	14	13	17	8	5	9	11	8	14	9	9	6	25	23	4	17	10	529	14.6944	0
CTCAAACTGTGGGGGCACG_ssc-miR-371-5p	5	33	13	10	14	30	11	25	52	5	17	8	11	151	3	3	103	17	3	5	35	9	26	22	14	3	3	16	16	14	9	13	8	18	4	23	752	20.8889	1
CTCAAACTGTGGGGGCACT_ssc-miR-371-5p	220	858	684	411	1031	866	507	1136	393	566	736	815	325	976	381	455	538	729	279	415	299	634	872	872	597	264	224	624	988	1045	707	1004	748	564	489	711	22963	637.861	1
CTCAAACTGTGGGGGCACTA_ssc-miR-371-5p	27	103	53	101	45	117	74	196	46	33	66	103	39	116	26	25	107	47	31	21	59	54	119	114	46	13	20	115	133	156	114	66	194	109	26	70	2784	77.3333	1
CTCAAACTGTGGGGGCACTC_ssc-miR-371-5p	139	413	326	678	318	800	576	1249	357	252	476	346	290	879	183	207	706	306	263	150	401	246	824	772	374	139	136	844	938	993	791	794	890	658	254	634	18602	516.722	1
CTCAAACTGTGGGGGCACTG_ssc-miR-371-5p	12	64	34	16	28	40	24	68	105	19	25	21	17	324	9	12	201	26	21	16	107	15	50	37	42	15	6	47	45	51	34	39	58	31	13	46	1718	47.7222	1
CTCAAACTGTGGGGGCACTT_ssc-miR-371-5p	1348	3872	2645	2028	3624	3522	2178	4868	1747	2167	2928	4336	1022	3575	1992	1854	2453	2666	1811	1713	1300	2689	3184	3405	2385	1060	992	3072	3567	3824	2586	4750	3665	2339	1846	2458	95471	2651.97	1
CTCAAACTGTGGGGGCACTTA_ssc-miR-371-5p	206	974	421	237	525	603	348	897	306	213	468	1087	137	593	299	164	251	311	151	255	214	439	393	525	291	56	102	339	437	552	292	530	606	349	183	317	14071	390.861	1
CTCAAACTGTGGGGGCACTTAA_ssc-miR-371-5p	80	224	161	34	111	71	32	183	46	64	78	248	25	102	43	35	34	95	51	67	25	100	45	77	79	19	21	70	108	123	55	129	99	69	50	60	2913	80.9167	1
CTCAAACTGTGGGGGCACTTAAA_ssc-miR-371-5p	39	111	65	30	49	28	19	99	22	59	47	137	9	52	25	25	33	70	46	34	10	34	29	38	53	19	16	35	65	69	41	73	30	45	35	33	1624	45.1111	1
CTCAAACTGTGGGGGCACTTAAC_ssc-miR-371-5p	10	17	16	9	14	10	9	27	11	17	20	18	8	41	6	8	23	19	33	4	7	10	18	22	24	2	5	17	33	28	24	24	16	10	11	18	589	16.3611	0
CTCAAACTGTGGGGGCACTTAAG_ssc-miR-371-5p	25	49	33	18	39	24	15	47	19	32	28	41	13	46	21	14	17	50	47	22	17	22	21	21	32	7	8	35	28	41	26	43	16	17	22	25	981	27.25	1
CTCAAACTGTGGGGGCACTTAAT_ssc-miR-371-5p	19	28	30	13	29	21	9	36	15	11	23	17	11	31	10	5	18	25	24	12	7	27	15	21	17	6	6	22	29	39	28	29	23	27	14	19	716	19.8889	0
CTCAAACTGTGGGGGCACTTAC_ssc-miR-371-5p	75	77	68	37	85	99	59	95	50	46	81	134	16	101	69	15	47	63	74	50	59	56	33	78	62	12	22	67	63	91	45	47	104	27	42	38	2187	60.75	1
CTCAAACTGTGGGGGCACTTAG_ssc-miR-371-5p	37	93	76	33	98	44	45	80	42	43	54	70	21	111	45	26	33	69	81	24	35	64	45	54	50	17	19	52	62	70	51	90	50	40	53	37	1914	53.1667	1
CTCAAACTGTGGGGGCACTTAGA_ssc-miR-371-5p	14	19	27	2	29	14	2	25	4	2	17	35	3	15	5	5	3	14	9	15	5	18	3	16	10	0	8	9	23	17	11	25	24	9	7	7	451	12.5278	0
CTCAAACTGTGGGGGCACTTAT_ssc-miR-371-5p	10	21	35	12	33	32	17	55	11	15	14	27	13	37	9	9	17	19	28	7	7	28	25	23	26	3	7	25	21	34	31	34	23	19	13	17	757	21.0278	1
CTCAAACTGTGGGGGCACTTC_ssc-miR-371-5p	669	1403	820	3349	891	4053	3091	4139	2265	655	2271	1751	1500	2770	883	784	2114	766	712	639	1978	656	2592	2376	1010	443	496	2718	1843	2924	2144	2099	4305	1262	950	1822	65143	1809.53	1
CTCAAACTGTGGGGGCACTTCA_ssc-miR-371-5p	14	19	9	1	7	13	8	22	10	0	14	30	0	19	6	0	4	2	0	9	10	9	2	7	0	1	0	2	2	5	1	1	23	1	2	4	257	7.13889	0
CTCAAACTGTGGGGGCACTTCC_ssc-miR-371-5p	24	29	28	15	34	51	29	36	22	5	46	51	10	25	43	10	10	6	0	24	21	18	6	34	6	6	2	11	8	22	5	27	55	6	10	3	738	20.5	1
CTCAAACTGTGGGGGCACTTG_ssc-miR-371-5p	161	465	238	144	348	410	273	413	527	161	296	398	89	918	209	132	564	233	220	132	471	225	224	284	179	76	59	236	199	334	192	284	373	142	163	186	9958	276.611	1
CTCAAACTGTGGGGGCACTTGA_ssc-miR-371-5p	23	71	46	8	46	31	11	58	15	21	30	65	8	39	12	13	13	27	32	21	10	55	24	27	14	2	4	22	26	38	19	46	28	21	14	12	952	26.4444	1
CTCAAACTGTGGGGGCACTTGC_ssc-miR-371-5p	27	31	25	5	26	36	15	37	25	2	32	41	4	19	26	2	2	2	5	17	12	17	5	23	0	2	1	1	3	37	4	4	38	6	2	3	537	14.9167	0
CTCAAACTGTGGGGGCACTTT_ssc-miR-371-5p	7456	14990	8700	11763	12382	19135	11800	17646	10599	7326	16307	23647	5657	12418	11142	11046	8074	9927	6433	9130	7674	8415	10690	11262	8294	5857	5941	10226	8448	13268	8407	15215	19476	5524	10368	7840	392483	10902.3	1
CTCAAACTGTGGGGGCACTTTA_ssc-miR-371-5p	1003	1866	1195	775	1053	1741	709	1643	899	468	1642	3541	389	916	702	794	489	692	458	1086	509	875	763	838	537	282	523	745	709	987	669	1168	2083	505	646	500	34400	955.556	1
CTCAAACTGTGGGGGCACTTTC_ssc-miR-371-5p	3671	4822	3243	4226	4354	5895	3261	5172	3399	3150	6085	8784	1509	3276	5106	4319	2358	4037	3232	3621	2681	3245	2870	3484	3199	2642	2623	3634	2439	3419	2180	6875	6367	1441	4269	2145	137033	3806.47	1
CTCAAACTGTGGGGGCACTTTCT_ssc-mir-371	74	136	75	59	100	176	67	110	73	50	115	203	49	107	73	63	42	58	33	72	54	72	106	95	43	42	38	60	60	89	70	109	174	38	83	71	2939	81.6389	1
CTCAAACTGTGGGGGCACTTTG_ssc-miR-371-5p	500	946	466	1129	757	685	826	744	662	732	1066	1546	526	1114	977	1148	640	870	1059	388	733	370	708	477	698	740	501	834	405	698	624	1207	497	216	1807	491	27787	771.861	1
CTCAAACTGTGGGGGCACTTTT_ssc-miR-371-5p	143	270	170	320	248	602	334	423	273	121	317	420	169	356	167	146	212	149	108	155	192	149	321	314	130	85	103	300	192	329	290	337	586	182	153	213	8979	249.417	1
CTCAAACTGTGGGGGCAT_ssc-miR-371-5p	8	24	15	39	13	50	45	84	30	16	18	18	29	62	10	6	66	12	13	8	33	12	56	56	31	7	3	57	65	77	58	27	64	29	10	47	1198	33.2778	1
CTCAAACTGTGGGGGT_ssc-miR-371-5p	17	25	32	174	50	169	153	159	92	49	117	11	122	140	32	42	119	45	37	23	119	22	235	98	79	48	26	177	153	160	165	120	98	66	70	115	3359	93.3056	1
CTCACCTGGAGCATGTTTTCT_ENSSSCG00000018677	22	55	51	17	51	112	44	69	28	20	84	233	11	34	45	28	18	23	17	49	13	24	25	42	31	12	31	38	26	59	24	38	127	23	16	23	1563	43.4167	1
CTCCAGCCTGGGCAACATAGCGAGACCCCGTCTCTA_ssc-miR-1285	24	10	9	8	37	30	24	0	8	0	29	11	5	2	5	11	5	12	7	11	21	19	20	3	8	1	19	23	7	13	15	22	29	12	10	3	473	13.1389	0
CTCCAGCCTGGGCAACATAGCGAGACCCCGTCTCTT_ssc-miR-1285	39	10	18	14	55	53	32	18	18	2	44	11	10	23	14	20	21	35	23	14	39	19	64	7	19	6	21	45	12	27	28	43	53	20	18	23	918	25.5	1
CTCCAGCCTGGGCAACATAGCGAGACCCCGTCTCTTA_ssc-miR-1285	17	3	9	2	28	20	3	8	6	3	43	8	2	9	1	10	4	8	4	5	9	16	8	1	4	0	5	10	1	14	11	28	19	17	4	6	346	9.61111	0
CTCCGTTTGCCTGTTTTGCTG_ssc-miR-1468	2	21	4	8	1	1	66	5	6	8	25	7	1	9	6	3	15	6	3	10	4	2	0	2	54	32	3	1	8	3	9	6	35	12	14	19	411	11.4167	0
CTCCGTTTGCCTGTTTTGCTGA_ssc-miR-1468	6	62	12	31	13	4	110	11	13	12	44	6	10	9	11	3	13	10	3	16	1	12	4	10	78	46	3	5	18	17	4	8	58	24	16	16	719	19.9722	0
CTCCTGACTCCAGGTCCTGTG_hsa-miR-378a-5p	48	119	68	48	135	137	43	87	62	40	144	396	40	68	93	58	51	90	16	90	23	81	36	95	53	35	43	59	60	80	43	115	148	55	78	55	2892	80.3333	1
CTCCTGACTCCAGGTCCTGTGC_hsa-miR-378a-5p	5	12	13	22	26	57	25	58	22	14	50	35	22	30	21	14	19	22	6	20	16	17	34	43	17	19	8	31	22	32	27	39	61	23	19	32	933	25.9167	1
CTCCTGACTCCAGGTCCTGTGT_hsa-miR-378a-5p	31	94	76	65	168	222	71	151	66	63	163	326	59	101	112	67	52	93	21	125	31	98	101	140	60	41	41	85	97	109	70	157	245	49	57	89	3596	99.8889	1
CTCCTGGGGCCCGCACTCTCG_ssc-miR-1343	18	63	18	23	17	8	48	19	15	32	41	48	10	25	23	12	26	20	25	33	22	9	9	15	46	42	13	22	22	26	15	22	41	10	31	11	880	24.4444	1
CTCCTGGGGCCCGCACTCTCGC_ssc-miR-1343	94	190	100	82	83	97	91	111	67	74	162	238	32	52	91	71	47	106	76	105	66	54	56	53	113	71	68	81	50	57	42	112	217	36	99	30	3174	88.1667	1
CTCCTGGGGCCCGCACTCTCGT_ssc-miR-1343	15	32	20	42	12	41	57	50	37	12	48	42	22	21	22	14	35	25	21	19	37	13	43	24	29	14	20	46	47	34	28	43	128	21	18	19	1151	31.9722	1
CTCGGAAGCTAAGCA_hsa-mir-7641-2	19	14	8	34	51	15	95	40	32	259	102	10	53	93	220	138	101	73	207	8	87	18	37	35	209	233	32	132	59	69	27	135	21	15	205	41	2927	81.3056	1
CTCGGAAGCTAAGCAGGGTCGGGCCTGGTTAGTA_hsa-mir-7641-2	4	7	6	13	9	9	17	10	3	97	14	3	3	12	13	6	23	5	17	11	16	3	6	6	40	50	4	15	12	50	7	13	5	7	23	5	544	15.1111	0
CTCGGCGTGGCGTCGGTCG_ssc-miR-1307	3	30	15	9	5	12	11	10	13	11	15	19	7	7	11	13	7	25	4	13	4	6	12	12	14	13	7	12	7	16	10	15	12	2	10	6	398	11.0556	0
CTCGGCGTGGCGTCGGTCGC_ssc-miR-1307	5	21	10	57	14	30	56	40	28	19	47	35	14	27	25	24	27	30	22	11	41	4	34	22	35	27	7	69	26	31	30	43	41	14	32	25	1023	28.4167	1
CTCGGCGTGGCGTCGGTCGT_ssc-miR-1307	38	128	81	167	117	136	172	148	107	117	236	187	84	109	175	115	148	109	105	93	114	61	121	117	170	113	73	181	113	154	124	144	162	60	172	89	4540	126.111	1
CTCGGCGTGGCGTCGGTCGTA_ssc-miR-1307	10	34	21	33	11	22	36	37	29	26	36	73	23	25	16	14	34	18	17	14	20	9	26	28	19	13	8	38	27	48	24	23	69	19	27	17	944	26.2222	1
CTCGGCGTGGCGTCGGTCGTG_ssc-miR-1307	169	687	334	322	345	260	406	300	281	394	624	905	164	315	464	332	313	367	323	300	270	199	204	231	580	452	242	348	296	402	226	433	428	152	566	189	12823	356.194	1
CTCGGCGTGGCGTCGGTCGTGA_ssc-miR-1307	93	307	138	372	152	237	327	326	219	154	372	481	122	223	214	167	255	170	186	117	160	90	236	206	250	166	107	331	197	229	179	261	377	120	288	159	7988	221.889	1
CTCGGCGTGGCGTCGGTCGTGC_ssc-miR-1307	45	63	40	96	85	63	85	71	56	112	132	103	37	64	107	105	76	104	60	46	48	39	65	56	121	88	74	84	43	53	74	109	55	26	160	61	2706	75.1667	1
CTCGGCGTGGCGTCGGTCGTGG_ssc-miR-1307	1118	3206	1467	2555	2726	1999	2986	2306	2381	2505	4097	4620	1140	2549	3569	2845	2085	2615	2379	1626	1867	1272	1885	1854	3562	2809	1809	2589	1833	2139	1552	3369	2294	896	4291	1370	86165	2393.47	1
CTCGGCGTGGCGTCGGTCGTGGA_hsa-mir-1307	74	135	90	127	104	91	108	88	88	106	185	286	39	81	129	96	62	118	133	88	69	91	66	82	122	116	58	119	85	94	65	138	117	35	170	75	3730	103.611	1
CTCGGCGTGGCGTCGGTCGTGGAA_hsa-mir-1307	30	54	23	54	25	24	34	41	20	36	60	115	13	40	40	38	26	35	64	23	21	12	15	17	57	27	24	41	27	38	20	43	52	9	55	22	1275	35.4167	1
CTCGGCGTGGCGTCGGTCGTGGC_hsa-mir-1307	4	3	5	34	8	20	26	15	10	12	19	5	10	21	15	12	19	19	15	3	14	3	27	21	11	10	6	16	12	9	12	31	16	6	22	15	506	14.0556	0
CTCGGCGTGGCGTCGGTCGTGGT_ssc-mir-1307	18	41	18	77	73	68	89	45	64	42	89	74	40	100	100	66	69	71	63	23	49	46	68	75	65	74	24	76	46	61	51	107	99	39	114	51	2275	63.1944	1
CTCGGCGTGGCGTCGGTCGTGT_ssc-miR-1307	31	118	61	258	103	174	234	195	154	86	173	155	114	190	92	119	203	116	83	47	139	47	221	142	125	100	49	226	147	158	159	157	212	92	163	127	4970	138.056	1
CTCGGTTGGCCTCGG_ENSSSCG00000025162	26	24	22	71	33	29	77	21	42	136	91	14	53	87	80	39	54	65	126	16	124	11	66	24	115	95	45	82	44	65	43	62	19	10	76	35	2022	56.1667	1
CTCGGTTGGCCTCGGA_ENSSSCG00000025162	69	72	94	206	150	74	209	89	122	379	303	25	140	202	269	147	132	206	358	57	293	22	230	89	368	270	210	270	169	208	149	282	72	32	324	101	6392	177.556	1
CTCTTTCCCTGTTGCACTAC_hsa-miR-130b-5p	10	15	9	22	20	7	23	17	15	21	32	19	12	13	43	25	22	29	22	19	12	6	12	15	26	26	7	23	15	12	4	37	15	10	31	13	659	18.3056	0
CTCTTTCCCTGTTGCACTACC_hsa-miR-130b-5p	3	7	5	49	11	11	30	23	15	5	10	4	7	7	17	11	16	14	24	7	8	6	14	10	21	5	5	29	9	12	10	20	17	9	13	10	474	13.1667	0
CTCTTTCCCTGTTGCACTACT_hsa-miR-130b-5p	25	53	47	135	22	56	96	45	38	39	80	48	21	37	103	53	79	54	86	47	33	17	30	27	86	68	33	68	35	63	27	111	63	33	68	47	1973	54.8056	1
CTGACCTATGAATTGACAGCC_ssc-miR-192	13	17	8	25	42	29	192	18	15	16	83	40	10	17	48	38	37	19	17	23	2	16	14	22	135	44	18	18	23	40	3	37	33	15	28	6	1161	32.25	1
CTGACCTATGAATTGACAGCCAT_ssc-miR-192	0	10	4	6	9	3	85	4	1	11	7	5	2	2	5	7	29	3	1	4	3	4	1	1	52	20	4	4	6	14	2	12	27	13	3	1	365	10.1389	0
CTGACCTATGAATTGACAGCT_ssc-miR-192	3	8	6	22	8	14	128	14	9	5	16	4	6	13	6	1	27	2	3	1	6	2	15	5	29	1	6	14	13	24	2	5	28	16	0	4	466	12.9444	0
CTGATCAGTAGTGGGATCGCGCCTGTG_ssc-mir-1285	27	7	22	3	17	8	19	17	22	12	11	2	10	34	28	8	9	20	18	16	34	6	27	8	19	10	9	28	6	17	12	17	9	5	19	9	545	15.1389	0
CTGCCTGGTAATGATGAC_hsa-miR-200b-3p	6	18	12	124	70	40	154	20	43	144	122	21	38	69	192	158	106	60	33	35	34	13	45	27	144	190	29	61	35	49	34	147	29	8	156	22	2488	69.1111	1
CTGGAAGACTAGTGATTTTGTTGTT_ssc-miR-7	7	12	13	22	18	23	30	21	20	10	38	35	10	20	25	23	28	19	13	19	12	8	15	19	28	16	8	29	18	31	13	15	32	20	20	24	714	19.8333	0
CTGGACTTGGAGTCA_ssc-miR-378b-3p	7	6	6	29	22	6	21	2	11	35	32	3	8	16	30	30	15	29	13	3	7	0	8	7	44	33	8	25	15	13	4	35	6	6	42	15	592	16.4444	0
CTGGACTTGGAGTCAGA_ssc-miR-378b-3p	63	151	81	154	253	148	193	143	97	163	273	356	55	128	295	227	86	260	61	127	78	107	112	131	221	163	103	122	118	146	77	270	149	62	242	98	5513	153.139	1
CTGGACTTGGAGTCAGAA_ssc-miR-378b-3p	68	177	84	151	223	133	174	131	99	176	291	383	51	143	340	269	101	243	94	139	86	99	123	114	205	166	100	155	104	153	81	254	163	61	230	95	5659	157.194	1
CTGGACTTGGAGTCAGAAG_ssc-miR-378b-3p	28	86	54	46	114	72	69	45	22	96	116	164	17	45	101	90	46	95	20	93	23	62	59	47	83	75	35	42	67	101	30	89	49	29	76	40	2326	64.6111	1
CTGGACTTGGAGTCAGAAGA_ssc-miR-378b-3p	27	109	71	78	49	89	90	69	51	74	85	198	43	69	70	59	88	70	16	66	42	32	59	64	64	40	20	55	96	165	58	72	123	66	54	50	2531	70.3056	1
CTGGACTTGGAGTCAGAAGAC_ssc-miR-378b-3p	8	18	15	8	20	7	24	9	12	9	25	27	4	5	19	19	12	14	5	12	4	8	6	9	13	9	2	3	8	13	9	21	11	1	13	11	413	11.4722	0
CTGGACTTGGAGTCAGAAGC_ssc-miR-378b-3p	6	22	16	18	24	10	13	9	9	29	43	33	4	16	37	24	13	29	12	37	7	20	12	12	33	24	9	10	18	17	9	42	18	4	31	5	675	18.75	0
CTGGACTTGGAGTCAGAAGG_ssc-miR-378	346	1935	1062	862	1592	1004	1201	849	692	1584	1719	2726	393	895	1663	1371	932	1493	387	1569	581	718	659	797	1646	1357	465	714	1100	1877	505	1533	1208	499	1323	632	39889	1108.03	1
CTGGACTTGGAGTCAGAAGGA_ssc-miR-378	70	470	156	362	310	446	428	488	290	147	443	704	157	332	317	190	258	178	62	174	160	142	310	294	195	89	73	312	219	407	241	337	555	235	180	253	9984	277.333	1
CTGGACTTGGAGTCAGAAGGC_ssc-miR-378	2682	10247	3860	6869	10659	7088	7642	6979	5633	6883	12576	18573	3046	5903	13400	10901	5834	9428	3837	5932	3365	4561	5901	5459	8599	6892	4286	6266	4772	7351	3885	11736	6685	3410	11248	5248	257636	7156.56	1
CTGGACTTGGAGTCAGAAGGCA_ssc-miR-378	336	841	490	486	871	745	472	739	450	373	1082	1837	199	488	861	563	288	755	286	646	284	553	324	501	467	283	310	370	411	564	329	870	849	324	598	333	20178	560.5	1
CTGGACTTGGAGTCAGAAGGCAA_ssc-miR-378b-3p	20	27	32	21	40	26	14	32	15	16	57	112	8	29	38	32	10	32	8	27	8	35	8	9	27	13	16	22	19	22	10	46	38	22	17	13	921	25.5833	1
CTGGACTTGGAGTCAGAAGGCC_ssc-miR-378	64	128	109	144	248	169	142	176	148	130	215	305	87	211	166	94	97	189	109	78	72	111	141	101	127	93	83	120	95	118	139	192	103	53	223	121	4901	136.139	1
CTGGACTTGGAGTCAGAAGGCG_ssc-miR-378	40	114	58	84	106	90	70	58	123	78	133	166	32	174	128	102	120	80	56	56	119	59	68	55	71	71	48	68	61	83	53	102	67	43	124	52	3012	83.6667	1
CTGGACTTGGAGTCAGAAGGCT_ssc-miR-378	32	177	65	186	170	230	224	153	121	65	157	206	117	213	143	114	136	116	60	59	100	78	211	144	105	70	31	133	122	152	151	226	183	84	138	164	4836	134.333	1
CTGGACTTGGAGTCAGAAGGG_ssc-miR-378	3	34	18	27	23	35	39	32	60	1	33	42	14	110	23	8	137	12	1	16	83	18	31	32	18	5	5	20	16	43	21	9	41	27	4	23	1064	29.5556	1
CTGGACTTGGAGTCAGAAGGT_ssc-miR-378	300	1338	520	3009	947	2609	3222	2447	1880	653	2108	2109	1373	2109	1168	951	2384	843	584	472	1247	462	2577	1875	1336	597	414	2521	1741	2564	1803	1942	2738	1639	1164	2019	57665	1601.81	1
CTGGACTTGGAGTCAGAAGT_ssc-miR-378b-3p	2	11	6	30	11	15	26	20	10	7	12	9	15	18	6	2	17	8	4	7	11	4	17	15	11	3	4	17	17	27	9	11	28	12	8	12	442	12.2778	0
CTGGCTCCGTGTCTTCACTCCC_ssc-miR-149	5	12	3	4	20	14	8	10	7	16	21	31	3	4	17	16	4	5	6	13	7	12	10	6	10	8	8	9	15	13	9	12	12	11	16	8	385	10.6944	0
CTGGGAGAAGGCTGTTTACTCT_ssc-miR-30c-3p	1	9	6	18	5	5	67	10	8	10	20	17	3	5	5	5	10	4	1	19	1	2	0	5	36	16	1	8	9	16	6	5	40	6	6	3	388	10.7778	0
CTGGGCAACATAGCGAGACCCCGTCTCTA_ssc-miR-1285	2	2	9	15	30	47	4	5	3	0	56	4	1	4	3	10	1	2	1	1	3	20	7	2	2	1	1	4	0	5	4	37	38	5	4	1	334	9.27778	0
CTGGGCAACATAGCGAGACCCCGTCTCTT_ssc-miR-1285	7	2	11	53	31	77	11	6	2	4	127	9	4	6	7	27	5	3	1	5	10	23	13	6	1	2	3	5	5	16	13	104	58	20	3	6	686	19.0556	0
CTGGGCAACATAGCGAGACCCCGTCTCTTA_ssc-miR-1285	3	3	7	35	44	46	4	3	5	0	85	8	0	1	0	12	1	4	0	1	9	33	9	5	1	0	6	6	2	6	3	79	55	22	0	0	498	13.8333	0
CTGGTCTAGGGAGGGA_ssc-mir-371	132	13	7	13	125	184	14	93	68	23	262	611	10	16	158	28	15	20	48	19	3	109	29	164	14	7	36	97	11	10	14	102	37	6	51	10	2559	71.0833	1
CTGGTTAGTACTTGGA_hsa-mir-7641-2	18	15	23	10	42	30	21	19	15	24	57	19	20	19	36	15	19	19	19	20	18	11	14	17	35	18	8	25	15	23	17	40	28	9	8	16	762	21.1667	1
CTGTAAACGCTTTCTGATG_hsa-miR-3607-3p	30	26	9	19	50	11	31	38	50	54	64	9	11	29	92	48	35	34	60	41	52	24	39	10	47	21	36	49	30	47	16	91	19	12	72	12	1318	36.6111	1
CTGTAAACGCTTTCTGATGTA_hsa-mir-3607	8	6	7	19	38	8	34	18	28	46	33	5	8	16	71	46	18	12	48	7	31	4	28	6	40	30	26	30	28	34	6	64	11	10	60	7	891	24.75	1
CTGTACTCCAGCCTGGGC_ssc-mir-1285	9	9	8	33	19	9	29	8	14	5	27	0	11	14	11	24	9	16	16	4	27	7	16	0	12	12	9	13	5	12	12	49	7	2	28	16	502	13.9444	0
CTGTACTCCAGCCTGGGCAACATAGCGAGACCCCGTCTCT_ssc-miR-1285	25	9	20	117	51	74	46	18	26	0	150	6	22	22	10	39	27	37	19	22	46	16	45	1	20	3	17	34	15	29	28	142	81	41	24	31	1313	36.4722	1
CTGTACTCCAGCCTGGGCAACATAGCGAGACCCCGTCTCTA_ssc-miR-1285	121	49	83	142	250	174	107	27	46	5	417	40	62	41	41	134	50	140	79	98	110	105	155	5	45	3	105	130	34	103	92	450	240	80	94	61	3918	108.833	1
CTGTACTCCAGCCTGGGCAACATAGCGAGACCCCGTCTCTC_ssc-miR-1285	27	12	20	126	37	88	136	74	106	6	142	6	109	94	45	34	68	82	87	19	181	5	183	5	72	9	28	182	44	108	114	151	100	54	50	81	2685	74.5833	1
CTGTACTCCAGCCTGGGCAACATAGCGAGACCCCGTCTCTT_ssc-miR-1285	363	95	181	444	545	404	446	205	421	54	880	49	298	355	331	298	319	892	522	218	675	111	645	23	402	45	303	604	219	496	327	904	467	250	386	308	13485	374.583	1
CTGTACTCCAGCCTGGGCAACATAGCGAGACCCCGTCTCTTA_ssc-miR-1285	155	28	75	135	171	141	59	73	70	13	353	19	35	73	46	98	41	234	84	107	103	69	91	6	81	12	103	127	52	105	98	450	198	75	76	45	3701	102.806	1
CTGTACTCCAGCCTGGGCAACATAGCGAGACCCCGTCTCTTT_ssc-miR-1285	44	13	26	59	62	43	28	45	57	6	82	10	47	34	48	28	30	110	70	13	47	18	65	4	38	3	46	58	32	52	36	111	63	30	44	45	1547	42.9722	1
CTGTCACCTTTTTGAGTAGA_ENSSSCG00000020534	14	9	13	5	17	16	7	18	4	4	27	19	1	8	8	4	1	7	2	17	2	11	5	14	9	4	2	4	3	5	0	7	17	1	6	5	296	8.22222	0
CTGTCTGGTAACGATGTC_bta-miR-200a	2	1	1	35	8	13	78	9	14	18	35	1	29	22	20	24	50	7	3	6	11	2	25	8	39	28	4	32	14	35	18	41	13	3	21	15	685	19.0278	0
CTGTCTGGTAACGATGTT_bta-miR-200a	6	12	11	132	78	58	252	32	67	119	200	13	105	89	209	168	172	82	29	51	46	9	97	60	188	171	34	97	60	126	65	210	65	21	182	43	3359	93.3056	1
CTGTGCGTGTGACAGCGGCTGA_ssc-miR-210	10	36	36	9	66	51	24	51	26	20	57	143	8	22	37	16	15	49	7	67	4	54	19	55	20	10	7	26	12	36	20	56	96	18	23	21	1227	34.0833	1
CTGTGCGTGTGACAGCGGCTGAA_ssc-miR-210	14	43	27	20	48	53	29	31	10	13	55	131	13	24	36	33	11	46	6	48	9	30	21	32	28	17	19	17	22	40	20	37	66	32	16	19	1116	31	1
CTGTGCGTGTGACAGCGGCTGAAA_ssc-miR-210	88	317	131	77	201	221	127	163	88	97	289	697	61	141	157	139	79	220	27	243	30	171	107	179	129	70	60	108	92	176	94	268	322	71	126	110	5676	157.667	1
CTGTGCGTGTGACAGCGGCTGAAAA_ssc-miR-210	8	34	8	9	14	27	10	13	4	8	24	95	5	6	19	8	12	16	2	24	5	12	11	12	19	4	5	13	6	17	7	17	32	3	7	4	520	14.4444	0
CTGTGCGTGTGACAGCGGCTGAAC_ssc-miR-210	6	17	4	21	18	22	30	13	10	14	18	20	12	22	9	18	24	19	3	13	5	12	19	18	23	11	7	13	7	18	26	12	33	15	20	24	576	16	0
CTGTGCGTGTGACAGCGGCTGAAT_ssc-miR-210	4	95	17	36	31	34	92	30	21	36	80	56	29	35	31	36	56	26	9	33	22	16	38	42	58	37	8	23	22	46	44	31	84	25	35	57	1375	38.1944	1
CTGTGCGTGTGACAGCGGCTGT_ssc-miR-210	3	29	14	9	28	41	18	20	9	7	32	62	9	11	24	12	9	26	1	33	6	28	18	58	16	9	9	20	22	23	9	35	59	13	16	30	768	21.3333	1
CTTAAACGTGGATGTACTTG_hsa-miR-302a-5p	43	62	57	53	89	65	77	62	50	53	98	86	48	76	89	72	41	114	33	84	23	49	43	57	66	65	51	38	53	69	48	112	47	19	102	44	2238	62.1667	1
CTTAAACGTGGATGTACTTGA_hsa-miR-302a-5p	3	15	6	9	9	22	15	19	4	1	10	13	6	19	6	3	7	9	2	8	3	6	7	8	7	2	3	6	7	14	8	16	21	3	2	7	306	8.5	0
CTTAAACGTGGATGTACTTGC_hsa-miR-302a-5p	180	280	258	235	339	298	261	343	184	176	348	374	111	284	424	263	136	361	174	379	108	191	147	216	244	202	161	158	238	245	174	453	291	94	391	161	8882	246.722	1
CTTAAACGTGGATGTACTTGCA_hsa-miR-302a-5p	17	29	23	59	25	50	68	76	28	11	18	33	33	37	28	27	31	9	12	22	11	14	41	41	13	12	10	45	33	49	42	38	67	30	22	20	1124	31.2222	1
CTTAAACGTGGATGTACTTGCC_hsa-miR-302a-5p	59	76	53	197	110	174	218	245	133	57	153	96	115	173	127	77	143	105	63	80	74	50	129	141	101	64	64	157	104	135	151	194	186	73	140	114	4331	120.306	1
CTTAAACGTGGATGTACTTGCG_hsa-miR-302a-5p	7	11	8	9	17	18	13	15	72	2	13	7	9	110	14	3	78	7	6	5	44	5	14	12	15	3	4	9	8	8	13	13	16	10	4	14	616	17.1111	0
CTTAAACGTGGATGTACTTGCT_hsa-miR-302a-5p	322	550	391	588	650	727	818	920	512	288	701	715	366	697	940	479	358	519	416	487	232	331	422	571	451	369	330	483	454	566	492	819	682	273	639	428	18986	527.389	1
CTTAAACGTGGATGTACTTGCTT_hsa-miR-302a-5p	32	44	40	44	62	86	55	88	55	29	49	52	43	72	77	30	19	53	32	48	25	37	26	77	30	26	28	32	37	34	50	51	58	16	71	36	1644	45.6667	1
CTTAAACGTGGATGTACTTGT_hsa-miR-302a-5p	15	29	36	91	19	105	126	108	73	23	67	38	61	86	43	27	71	34	26	30	37	19	70	82	41	10	17	61	68	87	83	79	93	49	45	67	2016	56	1
CTTACCTTGGGCCGTG_ssc-mir-339-1	14	11	9	14	27	32	13	23	17	10	50	71	6	11	28	12	13	10	12	6	0	33	16	31	11	9	8	29	9	10	10	16	6	1	13	4	595	16.5278	0
CTTATCAGACTGATGTTGAC_ssc-miR-21	11	26	10	52	43	19	84	22	14	42	63	14	20	31	64	60	36	49	34	11	20	6	34	16	77	68	18	26	24	28	19	60	15	15	99	27	1257	34.9167	1
CTTATCAGGTTGTATTATCATT_ssc-miR-374b-3p	4	6	13	11	27	46	14	17	5	10	24	60	5	7	8	11	4	10	6	12	2	8	10	14	9	6	4	15	15	17	6	11	11	12	5	7	452	12.5556	0
CTTATCAGGTTGTATTGTAATC_ssc-miR-374a-3p	3	5	4	33	13	54	34	30	26	5	30	20	15	20	11	8	16	9	2	5	4	5	21	24	13	7	3	12	19	15	9	17	43	14	4	23	576	16	0
CTTATCAGGTTGTATTGTAATT_ssc-miR-374a-3p	32	74	69	86	172	219	134	172	84	68	204	287	47	91	139	114	73	124	38	95	30	61	100	139	113	59	38	85	69	121	57	143	160	53	81	53	3684	102.333	1
CTTCAAGTAATCCAGGATAGGCC_ssc-miR-26a	7	19	4	42	12	15	142	21	28	18	36	13	12	19	28	13	35	18	7	10	8	10	12	19	37	19	6	14	10	23	15	26	41	16	20	27	802	22.2778	1
CTTCAAGTAATCCAGGATAGGCT_ssc-miR-26a	29	141	46	93	84	105	364	77	82	66	172	127	42	91	114	59	84	74	37	80	40	28	51	63	210	92	33	74	47	102	70	123	165	70	53	80	3268	90.7778	1
CTTCCATGTTTTAGT_bta-miR-302d	7	17	9	30	12	15	34	13	12	20	12	16	10	16	43	16	22	22	17	11	10	2	14	12	18	19	5	26	16	21	12	33	3	4	24	11	584	16.2222	0
CTTCCATGTTTTAGTAG_bta-miR-302b	23	42	16	72	60	25	82	40	48	92	95	21	33	97	225	87	47	86	93	37	30	8	40	42	113	105	52	50	42	61	43	144	20	15	175	36	2297	63.8056	1
CTTGGCACCTAGTAAGCACT_ssc-mir-1271	18	88	40	68	68	78	154	69	36	50	122	104	51	84	76	28	75	89	30	78	36	23	76	83	111	67	26	64	68	131	53	84	116	41	56	93	2534	70.3889	1
CTTGGCACCTAGTAAGCACTC_ssc-mir-1271	98	237	221	140	352	324	185	217	149	142	356	613	59	126	254	205	104	214	121	263	60	213	178	198	223	141	140	141	162	226	110	268	320	135	191	128	7214	200.389	1
CTTGGCACCTAGTAAGCACTCA_ssc-mir-1271	304	678	402	261	657	588	330	519	282	271	673	1458	130	342	600	397	230	467	260	528	125	483	242	407	369	242	204	264	275	396	194	509	750	254	405	242	14738	409.389	1
CTTGTCCCGGCCTGT_ssc-miR-92a	21	12	32	65	51	63	58	62	36	33	84	12	30	42	46	39	30	43	22	38	44	18	44	28	46	41	29	56	36	61	19	79	57	22	53	34	1486	41.2778	1
CTTTCAGTCGGATGTTTAC_ssc-miR-30e-3p	15	37	19	26	43	41	32	39	18	21	62	72	19	35	49	34	22	35	13	34	14	34	28	21	36	31	17	19	25	35	21	50	50	15	46	16	1124	31.2222	1
CTTTCAGTCGGATGTTTACAG_ssc-miR-30e-3p	32	66	58	43	91	80	56	68	40	41	130	185	22	32	87	75	40	70	14	84	15	54	35	51	70	44	46	38	29	52	26	60	80	22	71	29	2036	56.5556	1
CTTTCAGTCGGATGTTTACAGC_ssc-miR-30e-3p	93	176	147	186	288	229	211	228	126	143	304	351	86	197	248	201	121	231	66	238	84	172	117	168	205	154	99	111	128	165	114	345	273	78	262	142	6487	180.194	1
CTTTCAGTCGGATGTTTACAGT_ssc-miR-30e-3p	18	23	16	75	36	109	69	79	45	18	55	47	38	79	47	20	47	33	9	27	30	31	68	70	32	21	14	49	56	66	51	78	116	39	29	49	1689	46.9167	1
CTTTCAGTCGGATGTTTACAGTT_ssc-miR-30e-3p	5	13	5	13	11	14	30	6	10	7	24	7	6	11	18	13	10	13	2	14	5	15	11	16	16	4	1	6	11	18	6	18	31	8	18	14	430	11.9444	0
CTTTCAGTCGGATGTTTGCAG_ssc-miR-30a-3p	6	25	11	6	8	11	59	20	9	8	53	48	3	10	14	8	12	6	2	28	7	6	2	8	37	24	5	7	7	18	11	12	38	10	4	8	551	15.3056	0
CTTTCAGTCGGATGTTTGCAGC_ssc-miR-30a-3p	6	91	33	67	44	22	201	56	35	38	134	116	20	37	58	38	41	36	11	59	18	17	18	11	156	89	13	23	38	45	19	75	148	38	59	34	1944	54	1
CTTTCAGTCGGATGTTTGCAGT_ssc-miR-30a-3p	1	18	6	25	8	6	62	18	6	4	17	13	14	3	8	2	29	3	0	5	5	2	7	9	17	6	4	9	21	12	7	7	42	11	4	14	425	11.8056	0
CTTTGGTTATCTAGCTGTATG_ssc-miR-9	3	27	12	39	3	8	110	9	14	41	88	59	4	7	16	14	61	6	0	31	5	2	5	2	78	37	7	6	48	41	4	10	123	44	5	4	973	27.0278	1
CTTTGGTTATCTAGCTGTATGA_ssc-miR-9-1	4	29	9	6	4	5	39	14	8	15	62	61	4	6	5	7	16	1	2	27	1	5	1	3	37	14	1	3	21	23	1	9	103	19	5	5	575	15.9722	0
CTTTTTGCGGTCTGGGCTTGC_ssc-miR-129b	11	38	7	27	24	24	34	17	11	30	29	46	10	18	37	43	29	27	9	26	17	9	28	11	32	17	20	16	15	31	11	20	19	14	48	22	827	22.9722	1
GAAATGTTTAGGACCACC_hsa-miR-203a-3p	5	12	10	44	18	47	73	44	20	21	32	25	24	32	29	19	54	29	16	9	23	5	41	42	33	22	10	54	36	64	20	64	54	17	25	33	1106	30.7222	1
GAAATGTTTAGGACCACT_hsa-miR-203a-3p	49	129	69	149	174	187	247	131	90	138	212	233	70	144	221	153	153	156	59	107	68	102	163	162	154	129	80	165	128	210	105	260	205	89	140	131	5162	143.389	1
GAAATGTTTAGGACCACTA_hsa-miR-203a-3p	6	32	19	11	22	23	15	15	9	17	26	55	3	11	22	16	14	13	7	21	4	14	14	7	15	17	5	13	14	25	5	33	35	14	20	8	600	16.6667	0
GAAATGTTTAGGACCACTAA_hsa-miR-203a-3p	21	56	10	76	44	98	92	60	32	29	79	129	33	39	48	43	60	38	24	45	32	36	61	64	66	23	26	85	57	105	43	82	108	55	34	33	1966	54.6111	1
GAAATGTTTAGGACCACTAC_hsa-miR-203a-3p	8	22	12	18	37	18	22	18	16	26	34	28	4	16	32	25	18	27	16	15	8	13	19	17	32	20	13	11	15	17	10	33	16	5	27	11	679	18.8611	0
GAAATGTTTAGGACCACTAG_hsa-miR-203a-3p	404	968	622	818	1153	1046	994	803	607	1108	1679	1809	311	768	1814	1248	865	1110	480	967	374	624	713	768	1248	838	580	873	732	1204	433	1628	1030	466	1082	476	32643	906.75	1
GAAATGTTTAGGACCACTAGA_hsa-miR-203a-3p	24	43	34	24	70	53	43	44	25	33	57	103	11	38	58	48	23	55	21	39	11	38	20	40	44	27	16	22	40	49	25	80	54	13	45	18	1388	38.5556	1
GAAATGTTTAGGACCACTAGC_hsa-miR-203a-3p	2	13	17	32	42	70	29	26	18	16	36	26	22	46	29	28	15	31	13	9	19	34	66	86	21	9	14	36	21	39	28	63	39	27	28	52	1102	30.6111	1
GAAATGTTTAGGACCACTAGT_hsa-miR-203a-3p	22	70	41	103	330	293	111	84	38	64	138	121	89	167	234	143	65	149	35	74	41	186	223	249	107	75	38	65	97	140	127	256	126	56	135	199	4491	124.75	1
GAAGTGCTTCCATGTTTTAGA_bta-miR-302a	3	17	12	17	11	32	19	31	10	1	3	31	3	21	8	1	6	5	0	9	4	7	14	16	3	2	5	6	11	15	11	8	32	11	0	7	392	10.8889	0
GAAGTGCTTCCATGTTTTAGC_bta-miR-302a	88	162	104	181	145	302	274	350	157	47	213	303	76	219	224	88	115	104	50	163	84	68	106	177	100	63	52	169	132	256	132	229	385	76	91	137	5622	156.167	1
GAAGTGCTTCCATGTTTTAGG_bta-miR-302a	2	23	6	7	9	22	11	20	56	3	15	24	6	93	14	4	38	4	1	13	35	7	7	18	9	4	4	10	11	24	5	14	30	9	3	12	573	15.9167	0
GAAGTGCTTCCATGTTTTAGTA_bta-miR-302a	32	95	62	33	112	100	52	87	41	34	93	254	28	63	103	53	15	63	12	119	13	68	25	56	30	18	22	31	38	58	26	81	98	22	36	29	2102	58.3889	1
GAAGTGCTTCCATGTTTTAGTG_bta-miR-302a	58	217	86	38	154	90	78	107	56	41	124	368	31	109	170	96	29	79	27	143	26	68	53	72	64	36	36	28	44	78	29	113	81	26	72	38	2965	82.3611	1
GAAGTGCTTCCATGTTTTAGTGA_bta-miR-302a	183	866	337	154	584	396	329	431	253	202	562	1281	115	306	819	461	131	304	91	515	88	256	204	292	292	202	191	181	227	395	124	449	488	136	341	162	12348	343	1
GAAGTGCTTCCATGTTTTAGTGC_bta-miR-302a	12	54	26	28	43	52	56	62	41	13	53	83	17	38	56	31	26	23	8	38	15	11	30	44	25	16	11	28	35	46	27	36	59	19	26	26	1214	33.7222	1
GAAGTGCTTCCATGTTTTAGTGG_bta-miR-302a	5	43	15	11	21	17	20	22	39	12	21	36	8	54	23	8	34	7	6	23	24	12	10	13	19	7	7	13	20	23	7	25	24	4	14	15	662	18.3889	0
GAAGTGCTTCCATGTTTTAGTGT_bta-miR-302a	65	223	98	97	148	186	165	228	123	56	206	355	43	128	287	136	73	98	31	146	54	50	88	140	107	72	42	77	115	182	58	135	210	63	89	67	4441	123.361	1
GAAGTTCTGTTATACACTCAGGC_ssc-miR-148b-5p	3	34	21	9	21	11	34	4	6	19	20	31	3	8	19	7	8	7	3	28	6	5	5	9	33	21	7	8	14	23	3	14	25	5	8	7	489	13.5833	0
GAATAGCCACTGTACTCCAGCCTGGGCAACATAGCGAGACCCCGTCTCTT_ssc-miR-1285	8	10	11	36	26	26	11	14	15	4	26	4	17	16	19	13	23	46	23	9	8	6	43	4	29	4	26	31	22	15	22	48	17	14	17	20	683	18.9722	0
GAATGGATTTTTGGAGCT_bta-miR-1246	17	9	7	5	7	18	9	21	5	31	13	7	17	26	11	3	17	8	11	3	21	5	17	5	15	3	4	11	10	17	6	12	8	13	11	9	412	11.4444	0
GACGTTGGCTCTGGTGGTGAT_ssc-miR-1306-3p	8	34	16	38	15	13	40	31	26	13	27	41	9	18	16	8	11	11	18	13	15	3	14	10	22	24	8	16	22	19	19	17	36	12	26	11	680	18.8889	0
GACGTTGGCTCTGGTGGTGATG_ssc-miR-1306-3p	10	32	14	14	28	11	23	29	14	13	52	59	5	25	33	15	17	19	39	17	13	21	14	9	18	20	13	14	9	15	8	15	19	6	31	5	699	19.4167	0
GAGACCTCTGGGTTCTGAGCT_ssc-miR-769-5p	5	13	3	17	15	24	25	16	10	12	26	16	3	16	22	9	20	19	9	13	5	6	17	17	22	10	7	12	7	15	9	20	30	12	13	14	509	14.1389	0
GAGAGATCAGAGGCGCAGAG_bta-miR-6529a	40	83	15	53	25	17	80	23	31	63	56	90	8	20	94	29	50	19	95	38	30	6	9	16	62	49	16	47	26	28	4	31	36	14	54	9	1366	37.9444	1
GAGAGATCAGAGGCGCAGAGC_bta-miR-6529a	28	65	31	127	23	37	194	128	85	49	89	68	28	49	85	50	109	30	86	29	71	7	39	29	85	59	28	99	71	94	36	81	107	61	67	46	2370	65.8333	1
GAGAGATCAGAGGCGCAGAGT_bta-miR-6529a	212	503	179	359	156	206	720	357	356	303	485	618	79	227	597	280	331	169	423	218	250	89	127	138	501	317	162	339	239	400	124	320	437	194	226	114	10755	298.75	1
GAGATGAAGCACTGTAGCTC_ssc-miR-143-3p	0	5	1	4	0	5	108	1	2	5	4	7	14	4	1	2	7	138	1	3	0	2	3	31	147	169	1	0	0	2	32	2	8	5	89	106	909	25.25	1
GAGATGAAGCACTGTAGCTCT_ssc-miR-143-3p	0	3	0	2	1	3	72	1	1	1	1	3	11	1	0	0	5	52	1	0	0	0	1	13	65	55	0	1	0	1	14	0	4	4	31	60	407	11.3056	0
GAGCTCATCAGACTGATGTTGAC_hsa-mir-21	2	27	6	10	27	31	38	19	17	13	37	49	10	15	30	19	18	20	9	21	6	5	17	21	28	18	11	15	17	29	8	27	30	10	22	11	693	19.25	0
GAGCTCGGTCTGAGGCCCCTCAGT_ssc-miR-423-3p	23	41	17	47	45	45	44	61	46	35	65	56	24	38	45	24	32	30	34	37	25	27	27	42	54	23	19	48	34	45	30	48	67	24	40	20	1362	37.8333	1
GAGCTTACCAGACTGATGTTGAC_hsa-mir-21	9	28	22	24	55	29	54	21	17	28	63	66	8	19	55	38	19	41	8	32	13	18	22	20	38	29	7	18	13	35	15	37	31	21	28	15	996	27.6667	1
GAGCTTATCAGACCGATGTTGAC_hsa-mir-21	10	39	16	24	31	32	53	12	16	18	44	62	8	24	39	32	23	39	5	33	8	16	13	16	24	23	10	14	14	43	13	36	27	8	26	17	868	24.1111	1
GAGCTTATCAGACTGACGTTGAC_hsa-mir-21	4	24	15	17	31	21	40	22	15	24	40	50	5	15	43	21	22	23	8	16	7	9	18	21	24	23	8	10	10	24	12	37	18	10	25	16	728	20.2222	1
GAGCTTATCAGACTGATG_hsa-mir-21	4	12	9	31	35	16	51	9	8	32	61	24	21	21	41	24	34	65	9	20	17	7	20	17	64	43	11	22	14	31	22	38	16	10	65	55	979	27.1944	1
GAGCTTATCAGACTGATGCTGAC_hsa-mir-21	11	44	12	21	40	33	42	20	12	22	59	63	6	21	58	42	13	27	10	22	6	18	17	31	31	32	5	19	16	37	7	36	25	10	34	23	925	25.6944	1
GAGCTTATCAGACTGATGT_hsa-mir-21	3	25	6	18	23	18	47	11	10	16	43	45	20	17	11	3	6	36	4	27	5	9	22	17	20	14	4	8	21	19	22	19	63	15	15	43	705	19.5833	0
GAGCTTATCAGACTGATGTT_hsa-mir-21	5	12	9	12	6	11	21	6	6	11	40	28	7	10	11	4	7	36	2	12	5	7	4	16	20	4	3	2	7	22	8	11	32	7	9	34	447	12.4167	0
GAGCTTATCAGACTGATGTTA_hsa-mir-21	0	19	3	9	2	20	25	8	1	7	18	39	7	8	4	3	7	5	0	5	0	8	5	14	2	2	1	4	7	10	10	4	75	22	2	14	370	10.2778	0
GAGCTTATCAGACTGATGTTG_hsa-mir-21	32	380	100	75	219	177	298	111	87	144	438	618	69	137	98	68	152	177	21	348	24	118	87	192	276	142	35	47	147	224	85	127	574	128	105	178	6238	173.278	1
GAGCTTATCAGACTGATGTTGA_hsa-mir-21	57	621	168	54	278	296	272	172	95	101	566	913	68	144	149	80	99	209	19	452	31	245	94	226	247	120	49	58	139	277	91	164	944	170	91	187	7946	220.722	1
GAGCTTATCAGACTGATGTTGAA_hsa-mir-21	20	167	29	96	70	186	243	108	63	47	180	214	59	119	58	38	125	37	16	76	31	51	130	132	100	46	16	72	75	192	67	80	257	123	37	100	3460	96.1111	1
GAGCTTATCAGACTGATGTTGAC_hsa-mir-21	2713	9674	4013	5994	12727	9560	14310	6059	4961	7863	17418	17594	2872	6511	13446	10379	6920	9024	2835	8612	2723	5488	6350	7844	10206	8581	2861	4696	5294	10620	3202	10651	9650	3748	9229	4901	279529	7764.69	1
GAGCTTATCAGACTGATGTTGACA_hsa-mir-21	216	1144	357	312	834	671	759	463	276	358	1085	1790	159	381	691	478	362	425	144	622	175	446	344	466	541	360	161	250	312	598	209	501	933	307	339	299	17768	493.556	1
GAGCTTATCAGACTGATGTTGACC_hsa-mir-21	64	276	123	253	376	369	530	224	193	214	455	427	136	339	256	227	255	286	94	197	126	156	299	260	266	195	71	175	171	369	174	257	304	128	306	227	8778	243.833	1
GAGCTTATCAGACTGATGTTGACG_hsa-mir-21	8	77	17	26	43	61	40	32	79	16	63	62	15	121	27	14	134	25	7	36	56	26	24	31	39	13	7	15	22	46	18	33	73	17	16	33	1372	38.1111	1
GAGCTTATCAGACTGATGTTGACT_hsa-mir-21	123	795	252	496	636	738	1280	427	340	330	939	961	273	558	495	400	472	411	142	402	243	266	520	565	586	398	128	322	388	760	365	499	838	324	391	485	17548	487.444	1
GAGCTTATCAGACTGATGTTGAT_hsa-mir-21	130	664	221	1401	425	1895	3183	1020	811	345	1377	840	607	1230	450	381	1465	290	186	314	499	197	1362	1414	742	333	113	914	952	1924	784	868	1880	979	391	988	31575	877.083	1
GAGCTTATCAGACTGGTGTTGAC_hsa-mir-21	15	30	19	20	65	30	56	23	19	29	67	58	8	19	50	30	22	38	14	35	12	33	34	26	37	39	15	17	14	39	14	56	24	13	30	24	1074	29.8333	1
GAGCTTATCAGGCTGATGTTGAC_hsa-mir-21	6	30	15	22	43	38	43	15	14	33	64	56	9	26	43	34	24	25	2	29	7	22	25	32	35	25	12	18	16	34	8	35	25	17	36	15	933	25.9167	1
GAGCTTATCGGACTGATGTTGAC_hsa-mir-21	7	41	14	25	53	36	65	16	21	37	78	62	10	26	61	41	24	45	10	39	12	10	25	37	36	32	6	22	34	44	9	42	35	11	36	21	1123	31.1944	1
GAGCTTGTCAGACTGATGTTGAC_hsa-mir-21	4	11	7	10	20	23	10	2	5	12	26	19	5	4	20	17	14	14	4	15	1	7	11	13	16	8	3	6	7	23	6	19	20	9	13	14	418	11.6111	0
GAGGGCCCCCCCCAATCCTGT_ssc-miR-296-5p	2	6	4	1	11	26	3	19	2	1	11	24	2	6	4	1	1	8	0	6	0	12	3	12	3	0	5	5	2	14	4	1	21	8	4	10	242	6.72222	0
GAGGGGCAGAGAGCGAGACT_ssc-miR-423-5p	29	48	37	66	27	27	92	35	42	48	62	50	17	33	43	32	47	47	60	21	51	18	16	27	50	34	27	39	34	46	28	61	73	16	46	23	1452	40.3333	1
GAGGGGCAGAGAGCGAGACTT_ssc-miR-423-5p	48	85	55	82	35	57	74	76	61	33	75	99	21	36	47	29	34	56	82	38	39	30	29	39	68	48	22	48	43	44	24	57	138	44	53	32	1881	52.25	1
GAGGGGCAGAGAGCGAGACTTC_ssc-miR-423-5p	13	18	11	106	5	19	76	58	26	9	26	13	13	31	15	7	62	12	54	9	43	13	19	33	17	13	4	82	37	25	28	47	98	27	19	21	1109	30.8056	1
GAGGGGCAGAGAGCGAGACTTT_ssc-miR-423-5p	158	209	140	418	92	132	323	240	171	182	265	188	59	140	232	101	187	183	483	142	219	86	80	116	237	207	69	283	165	163	103	293	343	100	161	102	6772	188.111	1
GAGGGGCAGAGAGCGAGACTTTT_ssc-miR-423-5p	17	30	20	39	14	16	35	21	14	14	32	36	7	19	26	9	18	22	41	17	23	24	10	16	28	19	7	29	18	22	15	32	64	8	18	18	798	22.1667	1
GAGGGGCTCTCGCTTCTGGC_hsa-mir-6087	6	7	14	11	30	13	19	10	10	27	35	2	11	26	18	9	14	21	18	9	21	4	18	17	21	22	19	18	14	20	16	21	7	4	21	2	555	15.4167	0
GAGGTAGGAGGTTGTATAGTT_ssc-let-7e	2	47	10	9	5	11	39	9	8	13	30	22	12	19	6	1	17	5	2	26	7	16	11	6	21	15	3	6	5	17	13	15	71	19	7	13	538	14.9444	0
GAGGTAGTAAGTTGTATTGTT_ssc-miR-98	1	31	14	12	6	12	34	20	19	10	28	32	11	11	8	7	7	13	2	19	7	2	3	6	16	6	1	6	6	14	17	7	39	11	6	20	464	12.8889	0
GAGGTAGTAGATTGTAT_ssc-let-7f	7	33	4	24	14	16	96	18	17	14	46	24	11	25	5	6	17	19	5	21	5	5	10	9	33	5	3	8	13	20	13	20	47	26	15	28	682	18.9444	0
GAGGTAGTAGATTGTATAGC_ssc-let-7f	1	20	5	12	6	9	75	15	10	3	23	11	15	11	5	1	19	12	1	15	6	4	10	6	23	4	5	5	8	14	19	7	69	18	6	23	496	13.7778	0
GAGGTAGTAGATTGTATAGT_ssc-let-7f	13	163	26	42	39	40	216	48	32	39	115	119	44	62	32	12	81	48	8	75	18	32	25	33	119	59	10	18	45	77	52	43	242	67	25	108	2227	61.8611	1
GAGGTAGTAGATTGTATAGTC_ssc-let-7f	9	67	23	79	15	46	217	84	43	21	89	58	65	61	24	8	118	22	13	26	17	10	39	43	91	24	11	34	40	89	63	23	277	68	13	67	1997	55.4722	1
GAGGTAGTAGATTGTATAGTT_ssc-let-7f	72	635	173	196	182	220	725	294	193	172	576	477	155	261	124	63	324	130	33	278	59	109	117	159	446	202	67	147	179	276	209	149	880	271	149	376	9078	252.167	1
GAGGTAGTAGATTGTATAGTTT_ssc-let-7f	2	51	7	10	23	11	50	6	9	16	32	21	11	13	7	7	30	9	2	11	5	6	12	10	23	14	3	3	8	21	18	12	63	26	7	39	598	16.6111	0
GAGGTAGTAGGTTGCATAGT_ssc-let-7d-5p	3	24	7	6	4	8	24	16	10	3	12	19	4	11	4	3	6	8	0	11	3	3	5	6	17	5	5	3	8	12	10	5	47	12	2	10	336	9.33333	0
GAGGTAGTAGGTTGCATAGTT_ssc-let-7d-5p	18	56	34	25	14	24	57	41	15	17	43	50	14	23	15	6	31	22	6	47	17	14	11	19	43	18	14	19	14	26	19	18	118	34	9	24	975	27.0833	1
GAGGTAGTAGGTTGTAT_ssc-let-7a	5	66	8	18	13	13	90	21	21	20	37	35	11	17	17	2	27	8	5	32	8	10	3	12	38	21	5	11	15	36	27	17	91	37	7	40	844	23.4444	1
GAGGTAGTAGGTTGTATAG_ssc-let-7a	3	52	6	15	18	6	66	15	16	11	34	22	8	14	5	7	22	10	2	28	4	11	3	5	55	17	11	10	10	16	12	10	64	16	9	7	620	17.2222	0
GAGGTAGTAGGTTGTATAGC_ssc-let-7a	6	53	11	33	6	24	160	23	13	18	52	16	35	23	6	5	47	8	3	24	16	3	11	25	43	25	4	10	18	41	29	10	137	31	12	41	1022	28.3889	1
GAGGTAGTAGGTTGTATAGT_ssc-let-7a	20	360	78	96	90	96	524	122	88	93	241	185	98	113	50	19	163	61	14	170	55	58	33	70	290	145	22	43	100	177	144	72	609	214	63	193	4969	138.028	1
GAGGTAGTAGGTTGTATAGTA_ssc-let-7a	2	34	4	14	0	8	37	11	8	2	28	16	6	14	2	2	11	1	0	4	6	4	4	12	8	2	2	2	5	18	5	5	67	15	3	8	370	10.2778	0
GAGGTAGTAGGTTGTATAGTC_ssc-let-7a	16	141	24	105	28	55	406	120	54	54	147	64	66	102	16	9	139	18	17	56	43	19	37	42	106	50	12	60	70	143	136	47	533	166	38	149	3288	91.3333	1
GAGGTAGTAGGTTGTATAGTG_ssc-let-7a	0	23	8	1	1	6	18	5	20	1	12	4	4	25	2	1	31	0	0	5	6	0	1	1	5	1	0	0	3	7	5	0	38	14	1	4	253	7.02778	0
GAGGTAGTAGGTTGTATAGTT_ssc-let-7a	89	1237	251	325	208	262	1159	385	300	299	765	528	186	360	149	76	485	149	73	336	149	184	132	238	666	294	71	155	262	484	408	209	1777	504	146	591	13892	385.889	1
GAGGTAGTAGGTTGTATAGTTA_ssc-let-7a	2	66	6	10	6	7	25	7	5	6	21	40	2	3	6	1	11	5	2	16	3	7	1	5	20	5	4	1	4	15	4	6	54	10	8	15	409	11.3611	0
GAGGTAGTAGGTTGTATAGTTT_ssc-let-7a	3	133	22	15	15	29	74	22	20	15	59	42	14	31	7	4	38	13	5	23	13	23	7	19	43	32	2	3	18	29	18	20	150	46	6	50	1063	29.5278	1
GAGGTAGTAGGTTGTATGGTT_ssc-let-7c	8	103	22	21	26	20	223	45	30	16	67	45	21	39	9	9	41	13	7	32	14	7	16	12	100	42	6	11	19	40	48	29	133	41	12	48	1375	38.1944	1
GAGGTAGTAGGTTGTGTGG_bta-let-7b	1	19	3	9	4	2	33	3	5	6	17	15	2	8	3	1	3	6	1	7	8	3	1	2	17	5	1	1	9	11	5	2	15	10	6	14	258	7.16667	0
GAGGTAGTAGGTTGTGTGGT_bta-let-7b	5	60	20	19	14	13	95	28	13	20	59	39	13	28	14	2	25	15	2	39	10	8	5	15	69	30	10	5	17	32	40	11	115	38	16	37	981	27.25	1
GAGGTAGTAGGTTGTGTGGTC_bta-let-7b	2	37	10	30	8	14	106	25	6	6	36	19	17	34	5	0	42	7	7	7	15	3	10	11	27	10	6	10	16	34	38	9	134	50	11	39	841	23.3611	1
GAGGTAGTAGGTTGTGTGGTT_bta-let-7b	26	404	72	79	68	47	412	88	64	75	183	138	64	90	36	13	120	52	20	140	54	53	24	49	194	103	12	24	83	140	110	45	511	145	52	155	3945	109.583	1
GAGGTAGTAGGTTGTGTGGTTA_bta-let-7b	5	47	6	1	7	5	22	7	5	9	14	22	3	12	7	1	7	6	2	20	2	12	2	3	18	10	1	1	4	14	3	3	38	9	4	8	340	9.44444	0
GAGGTAGTAGGTTGTGTGGTTC_bta-let-7b	1	25	3	7	3	5	40	12	7	3	13	5	10	9	0	0	9	2	1	3	11	0	1	3	16	4	1	3	8	19	7	2	52	16	2	18	321	8.91667	0
GAGGTAGTAGGTTGTGTGGTTT_bta-let-7b	12	222	36	29	27	16	123	35	23	25	82	62	25	45	22	7	42	25	5	42	23	16	17	24	76	42	8	6	26	64	37	10	244	63	18	70	1649	45.8056	1
GAGGTAGTAGTTTGTAC_ssc-let-7g	1	26	5	7	8	6	29	7	2	9	19	14	5	11	6	2	12	8	0	19	0	5	5	7	21	15	5	4	12	15	8	11	29	7	9	20	369	10.25	0
GAGGTAGTAGTTTGTACAG_ssc-let-7g	2	29	6	5	7	7	40	9	6	11	24	25	3	9	8	6	11	22	1	14	1	8	2	9	29	14	3	0	7	10	9	7	32	7	11	17	411	11.4167	0
GAGGTAGTAGTTTGTACAGC_ssc-let-7g	0	15	4	8	5	10	72	12	9	10	31	13	9	13	5	3	19	13	1	7	7	2	4	12	20	9	3	4	10	12	17	8	38	15	3	35	458	12.7222	0
GAGGTAGTAGTTTGTACAGT_ssc-let-7g	6	142	21	46	45	33	254	53	33	40	111	72	51	59	24	27	74	46	8	55	18	24	25	32	151	62	8	20	34	49	67	56	197	59	53	128	2183	60.6389	1
GAGGTAGTAGTTTGTACAGTC_ssc-let-7g	5	57	12	32	11	24	128	34	21	18	63	40	40	35	8	6	57	19	4	16	11	5	20	27	43	11	2	13	32	35	52	22	173	43	17	71	1207	33.5278	1
GAGGTAGTAGTTTGTACAGTT_ssc-let-7g	28	482	83	82	115	124	428	156	99	70	315	317	107	123	67	50	173	84	19	166	42	94	100	118	268	100	46	69	116	182	163	92	595	234	84	301	5692	158.111	1
GAGGTAGTAGTTTGTACAGTTA_ssc-let-7g	4	44	11	5	7	3	14	8	2	5	20	25	4	10	8	2	5	2	1	14	1	10	1	2	15	4	1	3	3	8	4	6	29	4	1	5	291	8.08333	0
GAGGTAGTAGTTTGTACAGTTT_ssc-let-7g	1	50	8	4	11	11	27	7	6	5	32	14	12	20	5	2	19	2	0	6	5	13	5	13	26	13	4	4	8	13	21	11	41	11	4	27	461	12.8056	0
GAGGTAGTAGTTTGTGCTG_ssc-let-7i	4	12	7	9	10	8	22	7	7	5	15	18	4	13	5	5	10	15	0	13	1	11	2	7	19	11	2	3	6	12	8	6	30	15	9	22	353	9.80556	0
GAGGTAGTAGTTTGTGCTGC_bta-let-7i	3	22	5	19	5	19	57	14	5	2	28	22	13	14	9	1	32	9	1	7	8	6	13	8	17	16	1	5	10	16	16	10	89	23	10	34	569	15.8056	0
GAGGTAGTAGTTTGTGCTGT_bta-let-7i	8	118	29	31	54	48	201	58	28	36	131	123	43	63	21	15	84	49	6	81	11	28	37	66	126	57	10	27	61	81	63	27	292	93	41	127	2374	65.9444	1
GAGGTAGTAGTTTGTGCTGTA_bta-let-7i	3	36	6	18	8	20	74	17	9	8	47	24	23	28	5	1	41	5	0	13	10	6	6	21	17	3	4	9	15	28	23	6	131	37	1	39	742	20.6111	1
GAGGTAGTAGTTTGTGCTGTC_bta-let-7i	8	179	37	241	66	138	862	87	100	66	268	101	212	195	31	20	422	55	17	62	45	26	114	148	217	86	20	58	158	223	220	76	632	237	62	415	5904	164	1
GAGGTAGTAGTTTGTGCTGTG_bta-let-7i	0	32	5	10	8	12	50	13	28	2	28	13	6	71	1	0	114	2	0	8	16	0	9	11	19	3	0	0	2	20	16	6	65	12	1	29	612	17	0
GAGGTAGTAGTTTGTGCTGTT_bta-let-7i	68	1557	297	692	536	459	2594	368	361	541	1536	888	665	733	272	161	1197	429	67	602	191	301	327	504	1459	967	128	258	600	843	699	475	2624	899	469	1422	26189	727.472	1
GAGGTAGTAGTTTGTGCTGTTA_bta-let-7i	12	355	36	76	70	46	202	26	25	65	171	150	62	69	41	15	112	62	13	94	15	46	25	68	156	98	7	20	45	76	63	65	383	94	56	145	3064	85.1111	1
GAGGTAGTAGTTTGTGCTGTTC_bta-let-7i	1	30	3	17	6	11	61	11	8	8	27	15	16	13	2	2	49	0	0	9	2	0	10	17	13	4	1	9	12	17	21	7	85	28	5	44	564	15.6667	0
GAGGTAGTAGTTTGTGCTGTTT_bta-let-7i	6	262	32	50	81	59	286	35	26	37	199	92	59	74	34	14	132	37	4	74	17	52	39	62	130	92	11	23	51	84	69	58	410	122	42	173	3028	84.1111	1
GAGTGGTTTTACCCTATGGTAG_ssc-miR-140-5p	7	13	6	6	15	24	10	13	8	4	19	43	6	5	14	5	3	23	0	19	7	17	6	18	7	4	5	8	6	13	8	15	25	5	4	11	402	11.1667	0
GATAGCCACTGTACTCCAGCCTGGGCAACATAGCGAGACCCCGTCTCTT_ssc-miR-1285	15	8	8	6	26	25	20	8	23	6	15	11	22	19	7	20	27	43	31	13	23	11	42	3	31	0	28	37	10	35	30	23	14	12	18	31	701	19.4722	0
GATCAGACTGATGTTGAC_hsa-mir-21	0	5	3	24	12	7	48	4	6	30	34	0	15	14	30	31	29	24	8	11	4	2	22	8	30	35	5	19	13	24	11	27	1	4	47	9	596	16.5556	0
GATCAGTAGTGGGATCGCGCCTGTG_ssc-mir-1285	85	20	41	4	62	47	20	35	29	33	30	3	16	63	41	6	6	45	27	42	55	18	50	29	41	12	20	45	14	40	20	25	23	8	35	33	1123	31.1944	1
GATCTCGGAAGCTAAGC_hsa-miR-7641	22	15	19	13	32	30	12	40	20	51	37	12	18	34	50	23	24	27	47	13	38	19	20	23	46	32	12	43	17	44	14	32	22	8	43	13	965	26.8056	1
GATGACACGATCACTCCCGTTGAGT_bta-miR-425-5p	6	25	9	8	9	23	24	22	14	5	22	45	3	15	16	10	9	7	4	14	7	17	8	12	17	9	5	9	9	15	14	20	27	6	3	8	476	13.2222	0
GATGCGGAACCTGCGGATACGG_ssc-miR-7134-3p	42	99	62	91	82	60	144	62	73	81	122	125	29	87	104	65	66	103	56	68	57	42	41	61	134	67	48	60	41	47	47	101	86	21	110	32	2616	72.6667	1
GATTGGCACCTCTTTGAGTGAC_ENSSSCG00000020115	20	25	24	14	19	17	13	24	17	19	41	37	6	15	6	23	4	16	2	22	1	6	8	16	16	14	6	5	9	9	5	9	14	11	14	5	512	14.2222	0
GCAAAGCACACGGCCTGCAGAGA_bta-miR-330	126	294	117	60	137	161	106	131	80	66	170	365	37	75	166	92	41	112	94	139	39	85	39	75	125	39	44	62	60	101	51	125	189	59	77	48	3787	105.194	1
GCAAAGCACACGGCCTGCAGAGAG_bta-miR-330	20	39	13	9	21	28	13	17	19	12	21	59	8	18	33	25	12	36	9	14	12	15	8	21	15	7	12	11	18	10	6	28	20	5	12	2	628	17.4444	0
GCAAAGCACACGGCCTGCAGAGAGA_bta-miR-330	35	38	18	10	18	23	21	31	20	10	54	87	4	18	39	17	9	10	19	22	7	10	10	15	19	18	16	14	12	28	11	16	39	7	23	4	752	20.8889	1
GCAAAGCACACGGCCTGCAGAGAGC_bta-miR-330	12	32	10	36	10	30	37	22	21	19	27	30	13	24	29	20	26	14	35	13	21	10	17	18	21	12	10	37	19	33	18	29	31	10	24	13	783	21.75	1
GCAAAGCACACGGCCTGCAGAGAGG_bta-miR-330	34	34	20	14	26	34	25	23	32	19	33	60	9	30	43	30	23	21	28	13	20	14	6	12	27	19	16	9	17	8	16	41	39	10	20	5	830	23.0556	1
GCAAAGCACACGGCCTGCAGAGAGT_bta-miR-330	32	115	44	66	76	108	115	74	60	50	104	107	31	81	127	96	75	47	62	43	64	32	63	59	91	57	33	67	50	75	47	97	86	36	85	45	2500	69.4444	1
GCACTACAGAACTTTGT_ssc-miR-148a-3p	6	18	2	50	32	15	90	20	27	52	56	8	30	37	99	60	58	35	28	12	12	4	36	24	59	80	13	40	27	61	25	61	19	15	69	19	1299	36.0833	1
GCACTTGTCCCGGCCTGC_ssc-miR-92a	2	2	2	62	5	11	52	18	19	17	28	3	20	29	18	10	19	11	12	7	32	3	28	17	21	16	4	57	19	23	16	31	8	7	26	20	675	18.75	0
GCACTTGTCCCGGCCTGT_ssc-miR-92a	31	25	25	165	67	58	175	87	84	104	141	10	55	97	156	61	81	70	98	41	92	22	63	52	112	91	53	154	57	96	56	153	50	37	163	55	2937	81.5833	1
GCAGCATTGTACAGGGCTATCA_ssc-miR-107	8	30	8	3	8	5	3	19	4	2	9	63	0	1	3	0	1	3	2	23	0	5	2	3	7	1	3	0	4	6	3	2	21	3	0	0	255	7.08333	0
GCAGCATTGTACAGGGCTATG_ssc-miR-103	41	113	80	57	100	107	67	85	50	55	98	197	29	45	52	40	28	105	36	114	32	53	27	60	97	55	35	54	54	59	50	70	129	29	71	64	2438	67.7222	1
GCAGCATTGTACAGGGCTATGA_ssc-miR-103	76	242	114	54	136	178	103	163	70	43	208	525	26	64	115	89	58	92	32	189	25	127	59	75	92	38	65	49	73	107	48	114	309	97	98	50	4003	111.194	1
GCAGGGTCGGGCCTG_hsa-mir-7641-2	19	15	21	3	3	7	14	8	10	9	14	11	3	15	12	4	0	32	12	15	12	7	4	2	11	6	2	4	3	7	7	2	18	3	5	0	320	8.88889	0
GCAGTCCATGGGCATATACACC_ssc-miR-455-3p	12	104	50	12	20	45	17	29	11	5	43	91	4	16	5	17	10	13	1	9	11	23	14	11	12	5	6	12	24	21	3	16	24	6	6	8	716	19.8889	0
GCATGTGATGAAGCAAATCAGTATGAATAAAGTCGTGATACTGTAAACACTTTCTGATGTA_hsa-miR-3607-5p	0	2	5	37	0	4	5	1	1	0	0	0	7	1	1	0	0	44	1	0	0	0	1	1	29	30	0	0	0	1	22	1	1	0	0	22	217	6.02778	0
GCATGTGATGAAGCAAATCAGTATGAATAAAGTCGTGATACTGTAAACGCTTTCTGATG_hsa-miR-3607-5p	25	64	9	62	31	11	7	23	19	145	34	61	45	10	32	187	87	153	190	21	22	15	135	8	115	61	124	138	153	19	46	265	35	94	212	70	2728	75.7778	1
GCATGTGATGAAGCAAATCAGTATGAATAAAGTCGTGATACTGTAAACGCTTTCTGATGT_hsa-miR-3607-5p	3	9	5	21	3	3	1	11	4	22	9	11	7	5	8	31	23	20	23	4	8	4	24	5	18	12	23	30	42	6	12	44	7	25	25	16	524	14.5556	0
GCATGTGATGAAGCAAATCAGTATGAATAAAGTCGTGATACTGTAAACGCTTTCTGATGTA_hsa-miR-3607-5p	10	28	9	39	21	10	5	24	6	79	17	47	18	9	28	166	55	63	104	21	12	13	66	3	53	42	70	58	90	11	29	153	17	54	100	34	1564	43.4444	1
GCCACTGTACTCCAGCCTGGGCAACATAGCGAGACCCCGTCTCTA_ssc-miR-1285	18	9	13	9	39	20	12	1	4	0	29	19	3	7	1	8	5	9	9	11	9	10	19	2	3	1	11	15	10	10	14	29	27	8	14	7	415	11.5278	0
GCCACTGTACTCCAGCCTGGGCAACATAGCGAGACCCCGTCTCTT_ssc-miR-1285	25	11	18	17	36	42	19	17	19	0	41	26	14	15	7	26	17	62	22	22	26	14	39	2	21	3	24	34	14	30	28	56	34	13	13	17	824	22.8889	1
GCCTGGTAATGATGAC_hsa-miR-200b-3p	5	12	2	32	38	19	43	3	22	31	57	17	16	23	76	31	33	22	7	20	17	4	19	16	36	45	11	23	16	10	13	65	19	9	48	11	871	24.1944	1
GCGCCTGTGAATAGCCACTGTACTCCAGCCTGGGC_ssc-mir-1285	2	2	6	18	32	16	19	2	1	0	47	1	2	1	1	21	11	1	4	4	22	7	31	0	2	1	5	10	1	10	16	53	22	20	7	5	403	11.1944	0
GCGGGGCTAGGGCTAACAGC_ssc-miR-744	23	89	35	56	27	31	105	50	35	73	103	82	16	40	61	57	56	39	42	43	29	22	26	34	72	58	23	52	51	52	22	60	62	18	74	31	1749	48.5833	1
GCGGGGCTAGGGCTAACAGCA_ssc-miR-744	44	127	44	52	71	62	70	84	49	61	130	208	26	39	81	74	36	106	48	70	34	46	31	63	96	59	46	74	61	71	38	97	128	36	83	32	2477	68.8056	1
GCGGGGGACCGCCCCCCGGTCGGCGT_ENSSSCG00000024853	2	15	12	33	11	3	24	13	10	10	9	6	8	21	12	9	24	27	9	4	21	1	9	5	13	9	4	16	5	9	14	5	9	3	40	18	443	12.3056	0
GCTACATCTGGCTACTGGGTCTC_ssc-miR-222	14	15	16	14	36	27	10	19	21	17	17	34	6	19	81	51	12	13	35	16	5	23	43	46	23	10	16	34	26	18	11	129	46	9	32	18	962	26.7222	1
GCTACATTGTCTGCTGGGTTTC_ssc-miR-221-3p	0	22	8	2	15	16	7	10	4	3	9	32	4	5	9	6	0	14	3	11	2	19	10	9	6	1	4	6	6	15	2	18	20	7	3	5	313	8.69444	0
GCTCGGCGTGGCGTCGGTCGTG_hsa-mir-1307	27	64	18	19	19	15	24	23	26	38	59	90	9	28	46	26	14	32	20	34	16	15	13	16	50	28	21	25	25	39	16	31	27	11	25	18	1007	27.9722	1
GCTCGGCGTGGCGTCGGTCGTGA_hsa-mir-1307	10	22	14	16	12	23	21	28	15	9	28	43	4	17	13	12	10	22	6	13	13	4	9	10	20	3	7	28	8	12	13	19	39	17	7	6	553	15.3611	0
GCTCGGCGTGGCGTCGGTCGTGG_hsa-mir-1307	79	264	117	124	208	168	184	177	182	149	305	401	53	157	264	194	118	169	118	135	106	99	110	156	205	140	114	163	107	158	90	218	173	59	196	78	5738	159.389	1
GCTCGGTCTGAGGCCCCTC_ssc-miR-423-3p	75	112	75	184	104	63	176	99	119	144	197	150	50	84	186	152	138	152	121	109	72	53	59	84	203	160	86	178	130	120	53	227	160	52	189	58	4374	121.5	1
GCTCGGTCTGAGGCCCCTCA_ssc-miR-423-3p	6	29	7	18	12	9	27	13	5	25	22	20	2	9	14	13	11	21	8	17	10	7	9	11	38	24	8	14	16	19	8	25	19	3	19	6	524	14.5556	0
GCTCGGTCTGAGGCCCCTCAG_ssc-miR-423-3p	51	88	80	55	62	65	62	79	49	81	140	182	26	52	83	68	48	81	45	75	30	61	25	50	92	79	30	65	65	67	35	87	93	32	56	39	2378	66.0556	1
GCTCGGTCTGAGGCCCCTCAGA_ssc-miR-423-3p	11	21	17	27	22	18	37	36	14	27	49	36	7	17	18	13	22	30	14	16	12	9	12	21	29	18	10	32	37	43	22	29	53	19	31	10	839	23.3056	1
GCTCGGTCTGAGGCCCCTCAGC_ssc-miR-423-3p	54	76	73	331	77	174	285	250	151	115	211	111	89	148	128	92	185	126	107	81	134	56	125	133	192	107	67	268	218	195	157	238	333	112	163	129	5491	152.528	1
GCTCGGTCTGAGGCCCCTCAGG_ssc-miR-423-3p	6	20	5	20	0	6	15	15	52	5	14	7	8	72	3	3	101	5	1	8	62	6	9	3	13	5	3	13	10	13	3	11	15	8	5	20	565	15.6944	0
GCTCGGTCTGAGGCCCCTCAGT_ssc-miR-423-3p	381	616	463	930	713	825	1022	966	680	647	1350	1084	392	653	956	653	711	813	494	624	449	412	580	700	933	652	395	1004	741	867	543	1185	1300	448	852	590	26624	739.556	1
GCTCGGTCTGAGGCCCCTCAGTA_ssc-miR-423-3p	36	61	43	59	43	42	50	54	37	48	109	83	29	46	74	61	35	67	48	58	37	21	23	37	70	48	39	59	45	45	12	89	70	22	63	16	1779	49.4167	1
GCTCGGTCTGAGGCCCCTCAGTT_ssc-miR-423-3p	2	17	3	14	10	13	32	7	8	11	25	8	6	14	11	4	21	13	8	6	4	8	4	15	23	14	4	15	13	20	7	22	29	5	14	24	454	12.6111	0
GCTCGGTCTGAGGCCCCTT_ssc-miR-423-3p	2	7	6	48	3	12	33	22	17	7	18	6	6	16	3	2	21	5	10	3	17	1	14	21	19	5	1	46	25	19	12	19	38	12	5	16	517	14.3611	0
GCTCTGACTTTATTGCACTACT_hsa-miR-301a-5p	29	46	25	37	76	84	47	77	28	26	76	179	11	24	53	25	23	37	9	74	12	23	32	66	42	24	23	34	33	42	21	65	77	45	27	26	1578	43.8333	1
GCTGATCAGTAGTGGGATCGCGCCTGTG_ssc-mir-1285	40	14	15	8	46	19	28	21	24	25	21	1	18	49	33	16	17	32	24	24	35	4	31	13	33	23	18	29	8	39	26	16	16	5	22	19	812	22.5556	1
GCTGGACTTGGAGTCAGAAGG_bta-miR-378d	86	491	251	201	497	276	305	212	212	341	491	768	83	265	489	319	218	345	99	458	160	206	158	251	368	328	116	159	231	507	124	342	306	113	316	157	10249	284.694	1
GCTGTACTCCAGCCTGGGCAACATAGCGAGACCCCGTCTCTA_ssc-miR-1285	11	2	10	14	28	22	3	5	4	0	76	2	4	2	2	22	1	3	1	8	8	14	6	0	3	0	7	8	3	11	8	58	35	8	4	5	398	11.0556	0
GCTGTACTCCAGCCTGGGCAACATAGCGAGACCCCGTCTCTT_ssc-miR-1285	25	5	22	54	51	48	24	18	13	2	140	4	11	25	23	28	15	38	35	22	29	20	29	1	21	2	13	34	11	33	17	113	61	21	12	15	1035	28.75	1
GCTGTACTCCAGCCTGGGCAACATAGCGAGACCCCGTCTCTTA_ssc-miR-1285	5	4	3	22	14	19	6	3	3	1	40	3	2	3	4	11	0	7	7	5	9	15	2	0	3	0	3	4	5	11	5	64	27	11	5	4	330	9.16667	0
GCTTATCAGACTGATGTTGAC_ssc-miR-21	29	48	19	22	42	29	39	24	22	29	60	60	9	24	40	40	23	26	14	27	15	16	23	34	38	41	18	17	16	49	17	38	29	9	31	25	1042	28.9444	1
GCTTCCATGTTTTAGTAG_bta-miR-302b	34	21	10	72	30	15	74	29	42	92	98	27	32	41	170	47	42	83	83	36	29	14	10	37	92	99	34	74	37	43	34	141	22	7	137	19	1907	52.9722	1
GGAAGACTAGTGATTTTGTT_ssc-miR-7	7	21	26	49	50	37	60	46	29	33	57	49	21	31	37	39	34	48	13	28	16	13	34	30	42	26	19	41	37	63	31	66	38	22	66	32	1291	35.8611	1
GGAAGACTAGTGATTTTGTTG_ssc-miR-7	110	145	126	138	154	160	152	170	120	158	216	367	62	163	176	128	134	189	104	225	80	102	68	86	191	169	112	154	127	186	90	173	223	67	212	104	5341	148.361	1
GGAAGACTAGTGATTTTGTTGC_ssc-miR-7	18	23	26	89	28	71	107	82	63	30	68	83	38	61	32	36	75	49	30	40	41	16	69	47	52	40	25	105	81	102	61	48	150	60	61	81	2088	58	1
GGAAGACTAGTGATTTTGTTGT_ssc-miR-7	116	217	182	298	275	330	357	321	236	195	383	579	115	268	210	180	260	241	158	304	153	154	243	198	295	189	161	294	251	367	221	267	509	214	303	235	9279	257.75	1
GGAAGACTAGTGATTTTGTTGTA_ssc-miR-7	20	54	42	134	30	121	120	128	83	31	51	112	57	89	19	30	146	18	35	32	55	26	90	50	50	27	20	119	79	105	59	49	169	98	26	55	2429	67.4722	1
GGAAGACTAGTGATTTTGTTGTAAA_ssc-miR-7	18	29	19	12	20	13	25	20	11	19	33	52	6	10	30	22	8	18	22	14	15	9	10	16	27	14	12	12	18	22	12	33	18	12	16	9	656	18.2222	0
GGAAGACTAGTGATTTTGTTGTC_ssc-miR-7	210	375	260	1790	364	1004	1685	1170	839	447	979	679	520	893	419	403	1437	454	501	327	615	220	853	627	732	446	289	1401	914	1250	710	808	1351	831	635	802	27240	756.667	1
GGAAGACTAGTGATTTTGTTGTG_ssc-miR-7	13	49	21	49	15	55	56	40	242	12	23	37	10	321	17	14	453	14	13	18	154	15	36	38	77	18	9	47	29	62	36	23	60	48	17	58	2199	61.0833	1
GGAAGACTAGTGATTTTGTTGTT_ssc-miR-7	1463	2894	1868	4826	3527	4111	5559	4289	3445	3201	5129	6383	1649	3563	3692	3438	4589	3204	2779	2844	2110	1677	3190	2555	4266	3302	1953	4312	3449	4917	2553	4022	5113	2895	4414	2926	126107	3502.97	1
GGAAGACTAGTGATTTTGTTGTTA_ssc-miR-7	71	126	60	56	66	79	88	135	74	63	162	299	29	64	79	50	64	92	61	119	34	59	41	43	83	61	40	77	86	85	42	94	167	73	65	42	2929	81.3611	1
GGAAGACTAGTGATTTTGTTGTTAA_hsa-mir-7-1	14	35	18	22	11	33	19	37	10	17	28	70	11	11	18	12	16	24	21	23	15	16	12	16	24	16	9	12	19	33	14	18	43	16	16	9	738	20.5	1
GGAAGACTAGTGATTTTGTTGTTT_ssc-miR-7	5	21	11	22	21	27	34	21	17	22	21	29	10	28	32	26	28	22	16	14	19	18	34	17	26	12	7	21	21	44	20	28	37	16	27	21	795	22.0833	1
GGAAGACTAGTGGTTTTGTTGTT_hsa-mir-7-1	5	9	9	17	13	19	15	21	12	6	24	33	7	17	15	10	14	18	14	12	7	4	12	11	17	9	8	19	14	22	10	9	31	8	12	15	498	13.8333	0
GGAATGTAAAGAAGTATGTAC_ssc-miR-1	3	38	9	7	21	11	27	9	8	7	15	11	3	16	27	19	10	14	4	10	5	10	11	8	7	3	9	6	6	11	5	16	19	7	12	3	407	11.3056	0
GGAATGTAAAGAAGTATGTAT_bta-miR-1	5	32	6	1	25	27	24	13	2	6	14	26	11	10	31	30	15	11	6	10	3	7	14	11	11	3	6	4	16	10	4	11	16	10	7	4	442	12.2778	0
GGACGGAGAACTGATAAGGGT_ssc-miR-184	1	18	4	17	7	4	22	5	11	20	26	9	2	19	12	39	13	0	4	11	11	3	4	0	26	6	11	7	11	31	1	33	16	8	41	3	456	12.6667	0
GGAGAGAAAGGCAGTTCCTG_ssc-miR-185	5	14	13	6	12	19	12	11	7	9	28	41	7	10	8	9	10	27	5	19	4	14	8	18	10	8	1	4	10	14	5	21	34	7	13	11	454	12.6111	0
GGAGAGAAAGGCAGTTCCTGA_ssc-miR-185	62	108	91	50	143	182	71	101	54	62	205	334	35	58	121	114	41	120	28	148	26	113	70	101	120	56	43	71	55	132	38	124	177	62	72	62	3450	95.8333	1
GGAGGGGCAGAGAGCGAGACT_hsa-mir-423	8	20	10	25	7	22	29	11	16	10	15	21	9	15	13	6	12	8	19	11	18	9	7	10	13	5	5	8	14	11	10	10	20	4	12	10	453	12.5833	0
GGAGGGGCAGAGAGCGAGACTT_hsa-mir-423	15	24	26	22	15	16	43	23	15	8	34	32	1	16	29	7	12	17	19	13	20	11	7	15	13	14	7	8	14	24	14	18	31	11	8	7	609	16.9167	0
GGAGGGGCAGAGAGCGAGACTTT_hsa-mir-423	87	69	69	108	29	58	115	86	84	38	97	99	13	59	84	33	60	47	135	60	105	34	26	52	74	54	39	68	52	61	37	66	147	16	62	37	2360	65.5556	1
GGAGTGTGACAATGGTGTT_ssc-miR-122	12	18	19	42	20	30	39	28	24	32	28	8	2	36	40	35	23	15	17	25	14	10	11	15	29	17	10	12	19	18	12	19	7	12	37	9	744	20.6667	1
GGAGTGTGACAATGGTGTTT_ssc-miR-122	19	29	40	110	44	65	79	37	39	60	87	38	16	73	102	46	61	26	34	39	54	26	48	45	93	38	12	33	61	62	42	63	45	27	84	38	1815	50.4167	1
GGAGTGTGACAATGGTGTTTA_ssc-miR-122	8	13	13	53	6	34	43	34	18	9	21	10	20	30	16	4	30	4	13	9	22	11	18	24	22	1	2	15	25	26	20	19	34	13	14	9	663	18.4167	0
GGAGTGTGACAATGGTGTTTG_ssc-miR-122	221	439	437	847	542	528	595	410	393	578	843	359	173	574	991	544	505	263	642	487	465	322	296	334	784	413	214	305	437	469	249	696	371	223	959	294	17202	477.833	1
GGAGTGTGACAATGGTGTTTGA_ssc-miR-122	11	32	15	63	21	29	36	28	25	39	62	30	10	19	76	44	36	29	44	33	21	16	22	16	46	23	13	23	34	41	13	56	28	18	65	15	1132	31.4444	1
GGAGTGTGACAATGGTGTTTGT_ssc-miR-122	13	23	30	71	55	55	60	44	27	45	61	28	20	55	36	28	44	26	52	32	35	26	38	28	54	25	19	19	50	35	38	45	29	21	65	37	1369	38.0278	1
GGATGTTGGTCTAGTTCTGTG_ssc-mir-7-2	7	8	4	16	45	30	21	15	19	22	58	61	8	28	32	18	20	8	16	16	3	38	19	13	16	20	9	31	12	13	7	13	12	7	29	5	699	19.4167	0
GGATTGTTCTCCAACCTGGCTCT_ssc-miR-7857-3p	7	12	12	12	13	33	14	19	13	9	24	19	6	7	13	10	12	20	4	25	5	12	14	18	11	9	6	17	8	30	8	13	39	10	10	13	507	14.0833	0
GGCAGCGCCGCGGGAGCCTCGGTT_ENSSSCG00000025162	9	6	16	19	20	27	16	24	9	18	31	5	14	30	14	9	12	10	10	13	42	7	19	16	15	9	9	14	16	17	18	21	23	8	15	11	572	15.8889	0
GGCAGTGTAGTTAGCTGAT_ssc-miR-34c	1	10	3	22	4	5	90	9	7	22	38	35	12	5	10	6	20	6	0	25	4	2	1	5	59	17	0	5	15	17	4	6	37	7	9	3	521	14.4722	0
GGCAGTGTAGTTAGCTGATC_ssc-miR-34c	0	7	5	35	2	5	182	19	12	16	34	12	11	13	3	3	43	1	1	12	4	1	6	2	57	13	3	13	21	33	15	10	51	23	2	11	681	18.9167	0
GGCAGTGTAGTTAGCTGATT_ssc-miR-34c	12	71	40	130	53	29	875	87	56	90	316	250	54	37	56	54	187	37	9	159	22	12	37	25	473	200	18	49	104	179	84	63	210	76	22	30	4206	116.833	1
GGCAGTGTAGTTAGCTGATTG_ssc-miR-34c	5	68	44	118	28	19	481	89	75	137	340	294	23	27	55	36	142	20	7	208	25	24	24	14	411	164	27	44	139	140	31	49	246	77	13	15	3659	101.639	1
GGCAGTGTAGTTAGCTGATTGA_ssc-miR-34c	0	20	11	17	4	11	104	12	8	9	54	52	6	7	12	6	8	4	1	25	2	1	4	3	52	20	4	9	21	32	3	10	39	19	3	3	596	16.5556	0
GGCAGTGTAGTTAGCTGATTGC_ssc-miR-34c	12	233	78	244	96	32	1196	158	143	327	671	518	33	48	131	137	268	37	7	369	49	24	26	24	955	312	49	77	239	336	48	133	412	162	46	40	7670	213.056	1
GGCAGTGTAGTTAGCTGATTGCA_ssc-miR-34c	2	15	6	3	5	1	34	9	4	5	29	26	0	0	2	2	4	1	0	11	5	0	1	0	13	5	5	5	16	11	3	5	22	4	2	4	260	7.22222	0
GGCAGTGTAGTTAGCTGATTGT_ssc-miR-34c	3	37	16	125	8	20	668	62	67	47	186	97	14	27	22	17	132	1	3	45	18	2	19	12	209	49	9	52	115	127	28	35	202	78	16	15	2583	71.75	1
GGCAGTGTATTGTTAGCTGGT_bta-miR-449a	2	10	9	11	21	17	108	41	32	37	61	70	1	4	9	8	42	5	1	25	6	2	5	12	61	18	4	12	50	60	17	17	223	49	1	5	1056	29.3333	1
GGCCCTGACTGAAGACCTGCAGTT_bta-miR-1291	18	5	11	28	15	13	21	16	14	27	30	4	10	23	18	12	12	19	17	15	28	1	22	12	30	7	12	18	35	25	22	26	17	10	18	11	622	17.2778	0
GGCGGAGACTTGGGCAATTGCT_bta-mir-25	20	12	9	18	13	20	11	26	12	9	22	26	3	10	17	8	8	10	6	10	8	13	5	7	12	8	5	13	17	4	12	15	27	10	11	4	441	12.25	0
GGCGGGGGACCGCCCCCCGGTCGGCGT_ENSSSCG00000024853	7	27	11	19	11	12	22	7	8	17	21	22	14	24	18	8	23	43	12	9	18	7	7	4	14	6	3	9	2	12	15	5	19	4	50	18	528	14.6667	0
GGCTCAGTTCAGCAGGAAC_ssc-miR-24-3p	4	96	29	23	20	30	79	28	14	32	96	110	18	27	17	5	35	32	2	76	9	23	5	21	57	39	8	9	32	31	24	15	152	28	23	45	1294	35.9444	1
GGCTCAGTTCAGCAGGAACA_ssc-miR-24-3p	0	38	9	4	15	4	21	3	4	8	37	51	11	11	9	4	12	13	4	21	1	8	5	4	29	15	2	5	9	14	10	4	45	11	11	16	468	13	0
GGCTCAGTTCAGCAGGAACAG_ssc-miR-24-3p	6	111	22	9	32	12	49	17	11	28	65	114	13	19	35	15	23	16	6	46	7	12	10	16	52	32	7	12	17	31	14	24	92	15	26	15	1031	28.6389	1
GGCTCAGTTCAGCAGGAACAGT_ssc-miR-24-3p	3	63	13	7	12	11	36	8	5	6	38	31	12	10	8	4	16	9	0	24	7	4	7	7	37	12	1	10	12	24	12	9	67	24	7	32	588	16.3333	0
GGCTCGGTCTGAGGCCCCTC_hsa-mir-423	23	30	14	47	52	35	66	48	33	36	102	52	12	32	75	35	36	49	40	37	28	29	15	37	77	41	29	48	27	35	15	70	46	8	56	15	1430	39.7222	1
GGCTCGGTCTGAGGCCCCTCAG_hsa-mir-423	11	27	22	22	17	17	20	22	17	17	49	54	7	12	32	19	12	33	12	36	13	23	11	27	27	27	6	13	22	24	15	25	35	6	20	14	766	21.2778	1
GGCTCGGTCTGAGGCCCCTCAGC_hsa-mir-423	30	29	28	87	30	73	109	90	55	35	96	39	22	52	45	23	58	41	31	27	52	23	35	75	56	32	18	110	58	68	42	87	105	27	41	25	1854	51.5	1
GGCTCGGTCTGAGGCCCCTCAGT_hsa-mir-423	122	211	188	277	246	290	381	378	255	218	465	359	110	229	339	184	210	228	159	244	186	149	166	272	279	189	117	270	227	300	173	334	497	108	237	160	8757	243.25	1
GGCTCGGTCTGAGGCCCCTCAGTA_hsa-mir-423	13	23	15	13	10	14	13	29	17	13	28	33	6	18	31	12	14	14	15	18	13	8	4	8	15	20	9	14	8	14	5	32	25	6	20	5	555	15.4167	0
GGCTTATCAGACTGATGTTGAC_hsa-mir-21	16	81	37	72	112	77	110	48	44	89	121	150	30	51	108	111	73	96	33	73	32	47	59	69	99	94	32	51	52	63	30	110	83	48	94	56	2551	70.8611	1
GGGAAGACTAGTGATTTTGTT_hsa-mir-7-1	8	10	4	14	21	23	25	16	11	9	18	16	9	18	12	15	5	7	6	12	8	5	9	14	11	4	4	10	14	15	5	23	14	4	13	17	429	11.9167	0
GGGAAGACTAGTGATTTTGTTG_hsa-mir-7-1	39	59	49	44	63	57	66	57	43	36	93	130	15	57	75	43	41	58	21	80	39	58	31	46	58	51	23	42	32	76	21	37	88	20	46	37	1831	50.8611	1
GGGAAGACTAGTGATTTTGTTGC_hsa-mir-7-1	5	20	9	17	14	36	36	47	15	13	33	27	11	26	9	8	22	12	12	13	20	10	18	12	16	7	7	28	21	34	21	17	47	12	13	18	686	19.0556	0
GGGAAGACTAGTGATTTTGTTGT_hsa-mir-7-1	47	106	60	75	87	151	152	137	91	58	171	250	41	109	100	70	84	66	51	104	58	76	66	80	73	60	35	78	95	139	55	90	194	57	77	74	3317	92.1389	1
GGGAAGACTAGTGATTTTGTTGTA_hsa-mir-7-1	7	18	10	64	11	41	60	36	27	9	21	37	13	42	12	8	34	6	8	11	15	8	14	19	9	3	4	29	16	30	17	16	75	24	2	19	775	21.5278	1
GGGAAGACTAGTGATTTTGTTGTC_hsa-mir-7-1	93	129	83	440	129	366	662	447	319	114	355	253	162	357	157	142	396	140	122	119	231	79	281	223	205	139	86	386	274	517	196	209	513	229	186	225	8964	249	1
GGGAAGACTAGTGATTTTGTTGTG_hsa-mir-7-1	3	12	3	8	5	28	17	20	90	5	17	22	11	112	4	2	127	1	5	8	56	2	9	16	13	4	5	9	12	20	4	9	34	23	5	23	744	20.6667	1
GGGAAGACTAGTGATTTTGTTGTT_hsa-mir-7-1	564	1137	712	1422	1356	1594	2266	1676	1370	911	2087	2431	495	1337	1376	936	1278	952	808	1089	748	610	924	1027	1209	1029	575	1261	1021	1951	700	1139	1936	862	1266	863	42918	1192.17	1
GGGAAGACTAGTGATTTTGTTGTTA_hsa-mir-7-1	26	59	17	23	31	33	26	32	22	21	56	118	9	19	33	21	18	18	21	33	14	33	15	17	25	18	17	26	25	32	9	19	48	19	19	13	985	27.3611	1
GGGAGCCAGGAAGTATTGATGTT_hsa-miR-505-5p	23	26	24	13	7	18	16	35	25	3	21	32	4	9	6	2	7	18	10	16	8	7	6	18	13	11	7	22	14	12	14	18	33	8	6	9	521	14.4722	0
GGGCCTGGTTAGTACT_hsa-mir-7641-2	6	20	9	29	5	13	20	27	22	17	22	8	1	19	26	6	11	5	50	7	15	1	8	16	15	9	2	22	12	14	5	18	14	6	16	9	505	14.0278	0
GGGCGATCGGTACTCT_ssc-mir-503	0	0	1	5	20	21	3	9	4	1	20	25	1	2	12	9	1	2	0	0	0	12	14	18	6	2	6	16	3	5	3	12	9	0	8	4	254	7.05556	0
GGGCTTATCAGACTGATGTTGAC_hsa-mir-21	3	30	8	34	40	29	30	13	14	38	55	66	11	22	38	54	36	45	12	28	8	18	36	29	51	44	15	27	29	44	10	52	26	24	51	30	1100	30.5556	1
GGGGAACTCCCAGACCAGCTTC_ssc-mir-7137	16	16	15	3	18	14	8	19	7	8	13	33	6	12	4	4	1	12	5	18	2	13	6	13	10	2	3	5	5	14	9	9	34	2	8	7	374	10.3889	0
GGGGCTCTCGCTTCTGGC_hsa-mir-6087	15	17	6	10	12	9	25	14	20	27	15	17	11	20	40	9	10	30	40	7	32	4	28	15	28	30	14	21	17	17	16	14	6	3	20	4	623	17.3056	0
GGGGGACCGCCCCCCGGTCGGCG_ENSSSCG00000024853	5	18	10	19	38	9	46	1	3	75	40	7	10	34	48	18	47	17	2	14	19	10	11	7	68	46	6	5	22	40	13	14	15	19	42	7	805	22.3611	1
GGGTCGGGCCTGGTT_hsa-mir-7641-2	13	8	9	21	9	13	31	12	7	38	17	3	10	22	14	2	27	28	21	8	21	3	16	15	31	27	1	25	9	22	9	11	16	14	33	9	575	15.9722	0
GGGTCTTTGCGGGCGAGATG_ssc-miR-193a-5p	6	38	24	11	14	12	16	14	14	27	23	35	7	18	26	11	11	13	9	16	24	11	5	9	23	17	6	18	13	16	12	29	24	10	22	10	594	16.5	0
GGGTCTTTGCGGGCGAGATGA_ssc-miR-193a-5p	43	104	69	25	57	55	31	58	38	17	56	116	7	34	44	15	13	40	29	92	19	57	15	39	35	16	14	28	30	39	22	40	111	21	25	29	1483	41.1944	1
GGGTTGGGCGGAGGCTTTCC_ssc-miR-296-3p	30	69	50	81	33	27	95	55	49	96	83	82	29	42	88	54	72	65	74	64	50	27	25	44	105	96	37	62	54	46	40	85	81	27	90	38	2145	59.5833	1
GGGTTGGGCGGAGGCTTTCCC_ssc-miR-296-3p	6	7	8	32	7	18	25	27	13	10	24	22	14	14	19	14	15	16	4	6	12	5	16	18	17	6	5	24	22	20	16	29	26	7	14	19	557	15.4722	0
GGGTTGGGCGGAGGCTTTCCT_ssc-miR-296-3p	39	45	27	91	58	62	70	77	63	49	117	122	30	48	58	86	56	91	27	48	34	15	52	62	79	49	52	77	67	58	66	98	92	37	83	43	2228	61.8889	1
GGGTTGGGCGGAGGCTTTCT_ssc-miR-296-3p	4	12	3	26	5	8	35	19	12	9	8	13	8	16	8	6	16	4	6	9	14	0	10	6	14	9	3	20	17	19	9	18	24	8	3	9	410	11.3889	0
GGTTAGTACTTGGAT_hsa-mir-7641-2	11	23	28	14	32	42	31	48	28	41	50	5	14	33	30	13	21	21	42	21	34	14	35	33	43	29	12	33	19	37	12	27	33	13	31	18	971	26.9722	1
GGTTAGTACTTGGATG_hsa-mir-7641-2	51	19	33	31	55	26	67	48	49	130	71	3	28	87	153	40	53	56	146	30	62	19	37	39	120	132	27	84	38	86	24	93	29	16	99	33	2114	58.7222	1
GGTTGGCCTCGGATA_ENSSSCG00000025162	16	8	12	24	9	13	20	10	7	38	36	4	6	16	41	11	12	20	61	5	31	6	16	5	39	35	22	30	18	24	9	28	14	2	30	8	686	19.0556	0
GGTTGGGATCGGTTGCAATGCC_hsa-miR-92a-1-5p	14	7	11	30	4	12	35	23	14	15	19	12	8	12	16	6	17	15	12	5	22	4	7	9	10	7	7	18	13	15	13	17	36	19	8	11	503	13.9722	0
GGTTGGGATCGGTTGCAATGCT_hsa-miR-92a-1-5p	49	70	51	102	45	73	116	70	80	40	83	99	26	40	79	28	48	38	59	57	80	39	23	37	65	53	22	59	50	54	34	73	105	49	35	38	2069	57.4722	1
GTAAACATCCCCGACTGGA_ssc-miR-30d	23	107	44	68	73	50	128	53	42	70	133	154	28	42	99	56	61	77	34	79	35	37	37	40	127	70	29	49	57	59	40	102	132	37	96	36	2404	66.7778	1
GTAAACATCCCCGACTGGAA_ssc-miR-30d	1	40	19	17	16	13	67	17	10	15	57	91	2	14	16	10	8	17	8	46	2	13	6	10	47	20	5	4	18	28	11	20	62	17	5	13	765	21.25	1
GTAAACATCCCCGACTGGAAA_ssc-miR-30d	2	42	12	30	12	15	55	20	12	11	35	66	5	12	12	11	25	8	8	39	14	4	3	9	49	16	1	12	15	22	3	8	58	18	4	9	677	18.8056	0
GTAAACATCCCCGACTGGAAG_ssc-miR-30d	15	149	75	94	115	57	210	60	52	130	256	258	44	73	94	87	126	123	25	136	37	56	42	42	269	142	39	46	107	135	65	94	223	90	93	58	3717	103.25	1
GTAAACATCCCCGACTGGAAGA_ssc-miR-30d	3	25	11	40	4	26	62	27	19	11	22	18	9	19	12	8	28	9	4	16	6	2	18	15	28	10	3	29	20	31	23	19	43	31	5	11	667	18.5278	0
GTAAACATCCCCGACTGGAAGC_ssc-miR-30d	238	1081	454	712	723	515	1443	479	420	987	1359	1456	293	535	1067	825	773	871	401	887	355	334	402	419	1533	911	346	484	723	914	413	1070	1045	382	803	444	26097	724.917	1
GTAAACATCCCCGACTGGAAGCA_ssc-miR-30d	31	114	49	247	46	195	310	216	141	60	159	168	100	129	64	49	237	57	50	52	111	36	186	95	130	42	31	193	179	199	124	145	332	143	67	117	4604	127.889	1
GTAAACATCCCCGACTGGAAGCC_ssc-miR-30d	167	356	195	1141	353	655	1366	737	615	458	848	520	381	620	562	512	906	475	394	283	508	195	674	488	775	442	235	940	686	826	518	846	935	431	591	579	21213	589.25	1
GTAAACATCCCCGACTGGAAGCG_ssc-miR-30d	10	78	11	85	24	57	80	59	267	24	61	53	26	349	33	28	491	31	12	28	277	11	74	33	103	28	21	72	50	56	33	43	88	39	22	57	2814	78.1667	1
GTAAACATCCCCGACTGGAAGCT_ssc-miR-30d	893	2347	1124	3431	2218	2510	4483	2556	2122	2301	3887	3606	1355	2213	3165	2489	2729	2346	1674	1805	1694	1083	2222	2149	3645	2131	1208	2893	2425	3140	1734	3556	3463	1699	2800	1997	87093	2419.25	1
GTAAACATCCCCGACTGGAAGCTT_ssc-miR-30d	4	42	2	24	27	25	57	23	22	11	44	37	18	32	32	26	34	25	9	27	15	17	20	19	41	22	7	28	32	35	22	36	43	21	25	25	929	25.8056	1
GTAAACATCCCCGACTGGAAGT_ssc-miR-30d	37	148	63	331	43	168	619	182	152	95	250	152	144	214	84	76	284	76	64	70	132	36	179	142	240	70	31	183	243	361	201	166	444	210	108	157	6155	170.972	1
GTAAACATCCTACACTCAGCT_ssc-miR-30b-5p	3	37	15	4	19	32	13	21	9	9	19	86	11	17	20	7	6	8	3	20	6	18	19	20	11	2	6	7	12	28	19	15	48	16	7	13	606	16.8333	0
GTAAACATCCTACACTCTC_ssc-miR-30c-5p	5	16	14	7	14	18	12	15	8	4	13	32	1	2	7	7	2	7	2	14	5	5	4	20	5	4	6	3	4	16	3	8	14	8	1	15	321	8.91667	0
GTAAACATCCTACACTCTCAGC_ssc-miR-30c-5p	36	233	72	53	145	116	110	115	46	56	180	363	35	84	94	79	36	105	34	123	31	73	59	88	130	59	33	32	58	91	57	114	140	59	60	67	3266	90.7222	1
GTAAACATCCTACACTCTCAGCA_ssc-miR-30c-5p	1	15	3	7	5	22	11	17	6	0	12	14	6	10	3	0	1	2	1	3	3	7	10	18	0	2	1	4	8	13	3	6	25	12	2	8	261	7.25	0
GTAAACATCCTACACTCTCAGCC_ssc-miR-30c-5p	9	37	17	19	34	87	36	54	20	11	50	79	13	40	23	14	16	25	4	25	21	17	31	43	25	2	10	22	22	45	30	28	97	42	15	32	1095	30.4167	1
GTAAACATCCTACACTCTCAGCT_ssc-miR-30c-5p	64	246	104	58	188	309	164	236	120	59	207	500	44	98	122	47	44	91	36	155	47	149	89	185	90	32	43	73	105	163	90	92	377	100	58	104	4689	130.25	1
GTAAACATCCTACACTCTCAGT_ssc-miR-30c-5p	5	34	14	24	13	36	70	35	15	6	35	45	9	25	10	6	21	7	1	6	11	4	16	21	18	9	4	18	16	39	11	18	63	17	7	27	716	19.8889	0
GTAAACATCCTCGACTGGA_ssc-miR-30a-5p	7	40	16	14	14	9	88	17	14	24	67	70	6	11	20	25	26	21	3	39	6	5	7	8	79	35	4	7	20	25	10	27	57	12	14	17	864	24	1
GTAAACATCCTCGACTGGAA_ssc-miR-30a-5p	2	34	13	15	3	5	49	13	7	9	52	50	5	7	8	3	14	16	0	24	0	3	5	8	55	19	6	3	7	14	5	11	31	17	7	14	534	14.8333	0
GTAAACATCCTCGACTGGAAA_ssc-miR-30a-5p	0	4	4	5	1	1	52	3	3	7	20	18	4	2	3	8	11	2	0	12	2	0	1	3	32	14	1	2	2	6	3	9	23	5	3	6	272	7.55556	0
GTAAACATCCTCGACTGGAAG_ssc-miR-30a-5p	4	98	37	61	25	19	284	42	29	65	209	154	24	31	43	31	84	41	4	116	26	18	21	17	276	114	15	20	58	72	33	47	120	45	42	32	2357	65.4722	1
GTAAACATCCTCGACTGGAAGC_ssc-miR-30a-3p	31	338	87	203	95	39	740	132	78	199	472	324	67	83	154	110	182	109	30	229	71	27	52	44	603	304	51	83	160	204	85	147	277	128	127	93	6158	171.056	1
GTAAACATCCTCGACTGGAAGCA_bta-miR-30a-5p	1	51	13	44	9	18	99	45	28	16	45	53	18	20	9	7	37	15	3	18	14	5	20	8	36	16	2	24	33	45	21	19	104	34	10	27	967	26.8611	1
GTAAACATCCTCGACTGGAAGCC_bta-miR-30a-5p	15	102	41	171	27	48	485	140	80	47	219	93	79	90	47	31	180	50	11	47	57	13	81	39	186	66	32	93	111	120	69	97	228	85	87	117	3484	96.7778	1
GTAAACATCCTCGACTGGAAGCG_bta-miR-30a-5p	4	20	4	7	4	6	31	19	43	4	8	12	3	51	1	1	71	2	0	4	30	1	5	3	21	1	1	10	9	13	7	7	21	9	3	10	446	12.3889	0
GTAAACATCCTCGACTGGAAGCT_bta-miR-30a-5p	74	607	202	488	274	230	1538	489	306	278	906	606	260	310	338	238	519	302	113	377	178	85	262	147	827	342	123	302	380	481	248	506	876	341	343	349	14245	395.694	1
GTAAACATCCTCGACTGGAAGT_ssc-miR-30a-5p	1	53	16	100	4	23	293	37	19	23	73	35	33	30	9	5	95	13	1	21	19	4	21	18	101	22	6	31	51	73	35	30	110	77	9	31	1522	42.2778	1
GTAAACATCCTTGACTGGAAG_ssc-miR-30e-5p	2	23	12	4	19	8	10	10	7	12	24	31	3	3	7	9	7	18	5	30	4	7	3	12	20	5	4	1	5	8	9	6	32	2	7	14	383	10.6389	0
GTAAACATCCTTGACTGGAAGC_ssc-miR-30e-5p	20	49	42	19	51	47	33	29	24	18	60	102	14	26	38	18	21	44	12	53	13	31	26	51	32	16	12	17	19	35	21	46	76	18	32	22	1187	32.9722	1
GTAAACATCCTTGACTGGAAGCA_ssc-miR-30e-5p	14	57	34	65	27	150	62	112	59	9	75	93	32	60	15	11	52	27	25	29	35	25	54	99	34	7	12	84	60	71	64	42	193	64	22	56	1930	53.6111	1
GTAAACATCCTTGACTGGAAGCC_ssc-miR-30e-5p	90	166	131	353	217	517	439	446	203	103	387	345	170	266	182	135	250	232	99	177	149	139	308	380	199	104	101	302	252	349	304	344	590	234	162	300	9125	253.472	1
GTAAACATCCTTGACTGGAAGCG_ssc-miR-30e-5p	6	29	13	17	21	64	29	48	108	5	27	38	14	132	9	7	105	11	1	18	95	9	25	15	24	10	4	19	21	29	26	13	50	17	1	30	1090	30.2778	1
GTAAACATCCTTGACTGGAAGCT_ssc-miR-30e-5p	504	1371	755	974	1543	2139	1259	1532	937	622	1803	2546	512	987	1075	739	676	1110	366	1073	497	914	994	1416	987	443	471	1037	902	1306	807	1430	2112	844	782	1070	38535	1070.42	1
GTAAACATCCTTGACTGGAAGCTG_ssc-miR-30e-5p	28	60	59	32	74	63	45	48	34	37	91	102	12	45	74	41	28	54	28	54	29	35	36	43	45	32	32	47	32	39	30	43	69	21	51	26	1619	44.9722	1
GTAAACATCCTTGACTGGAAGCTGT_ssc-mir-30e	11	15	11	18	37	45	15	30	6	7	28	30	6	29	13	14	10	9	2	11	16	7	15	13	20	6	7	11	11	14	13	27	21	13	15	9	565	15.6944	0
GTAAACATCCTTGACTGGAAGCTT_ssc-miR-30e-5p	3	20	10	8	13	35	17	15	13	4	25	31	7	8	9	9	15	13	2	8	8	11	11	15	16	8	7	12	13	20	15	20	27	15	10	14	487	13.5278	0
GTACAGTACTGTGATAACTG_ssc-mir-101-2	9	34	7	9	20	29	20	17	8	15	36	71	1	17	24	22	15	37	3	21	5	18	7	29	21	30	10	9	15	20	4	26	24	12	20	11	676	18.7778	0
GTACAGTACTGTGATAACTGA_ssc-miR-101	30	115	43	39	106	95	103	61	32	48	141	191	21	45	107	86	48	114	27	75	15	51	53	90	107	57	29	41	44	70	22	88	94	37	76	62	2463	68.4167	1
GTACAGTACTGTGATAACTGAA_ssc-miR-101	225	653	298	324	728	606	408	422	220	335	883	1173	131	277	633	578	304	625	184	617	90	368	344	570	476	363	243	329	260	529	131	616	516	222	413	235	15329	425.806	1
GTACAGTACTGTGATAACTGAAA_ssc-miR-101	25	103	42	25	67	63	48	48	32	36	91	110	10	24	74	56	24	74	28	45	17	37	31	73	48	39	33	11	37	55	13	57	62	24	45	27	1634	45.3889	1
GTACAGTACTGTGATAACTGAC_ssc-miR-101	1	11	13	27	17	26	24	12	7	14	27	41	10	28	11	17	14	19	7	16	6	12	20	30	19	16	3	15	16	23	9	22	17	5	23	19	597	16.5833	0
GTACAGTACTGTGATAACTGAT_ssc-miR-101	14	38	17	40	62	63	84	39	23	24	48	62	23	29	38	34	49	72	16	35	25	20	69	67	40	31	14	30	41	70	19	65	36	14	40	37	1428	39.6667	1
GTACATGATGACTAAAATTTCTTCACTTTGACC_bta-miR-1434-5p	12	23	17	26	23	12	28	25	9	34	39	11	13	29	32	23	16	30	26	21	29	11	16	13	44	52	19	26	16	29	9	43	22	2	37	8	825	22.9167	1
GTACTCAAACTGTGGGGGCACT_hsa-miR-371a-5p	14	9	15	12	20	13	22	21	10	5	18	20	10	20	14	12	8	6	12	9	17	5	6	12	10	6	5	8	7	7	17	11	16	4	14	6	421	11.6944	0
GTACTCCAGCCTGGGC_ssc-mir-1285	8	2	3	37	22	14	24	10	10	6	60	2	6	14	17	29	3	7	18	0	13	9	30	2	18	6	9	13	3	18	8	86	17	10	17	13	564	15.6667	0
GTACTCCAGCCTGGGCAACATAGCGAGACCCCGTCTCTA_ssc-miR-1285	23	10	17	25	42	50	25	6	13	2	67	12	9	14	4	14	10	11	9	18	21	31	27	2	7	1	11	20	5	16	14	64	42	16	12	8	678	18.8333	0
GTACTCCAGCCTGGGCAACATAGCGAGACCCCGTCTCTT_ssc-miR-1285	64	21	38	57	95	81	47	49	61	4	111	14	40	53	37	34	44	85	50	46	66	44	66	4	31	7	41	73	36	61	51	102	100	43	27	40	1823	50.6389	1
GTACTCCAGCCTGGGCAACATAGCGAGACCCCGTCTCTTA_ssc-miR-1285	26	9	17	24	47	57	8	11	21	0	55	15	8	8	3	9	6	34	6	15	11	36	12	4	12	2	12	17	12	20	6	73	61	15	8	5	685	19.0278	0
GTACTTGGATGGGAG_hsa-mir-7641-2	50	33	27	9	36	22	20	40	50	38	69	8	10	39	42	11	9	25	39	32	41	18	16	40	29	24	14	33	16	39	14	22	25	9	28	18	995	27.6389	1
GTAGCTTATCAGACTGATGTTG_ssc-miR-21	1	15	13	2	12	18	9	13	5	3	18	39	3	14	5	2	3	7	3	19	2	6	7	17	6	2	5	3	7	17	2	1	26	6	10	4	325	9.02778	0
GTAGCTTATCAGACTGATGTTGA_ssc-miR-21	10	25	11	7	30	38	18	19	9	7	34	58	10	17	15	13	13	20	5	26	9	22	11	23	12	13	7	7	7	13	6	10	33	9	6	6	579	16.0833	0
GTAGCTTATCAGACTGATGTTGAC_ssc-miR-21	19	49	30	19	36	51	39	31	16	15	52	118	11	27	42	22	26	29	11	42	13	31	26	30	33	33	18	22	18	37	18	33	44	10	21	26	1098	30.5	1
GTAGTGGGATCGCGCCTGTG_ssc-mir-1285	64	21	21	50	86	54	84	42	44	24	148	9	39	60	49	41	43	81	66	35	93	21	87	13	70	14	37	81	21	66	35	81	35	24	77	30	1846	51.2778	1
GTAGTGGGATCGCGCCTGTGAATAGCC_ssc-mir-1285	8	1	25	160	99	82	47	3	7	2	709	1	6	8	4	104	7	8	7	1	6	37	33	0	5	1	13	36	3	20	9	452	85	54	32	7	2082	57.8333	1
GTAGTGGGATCGCGCCTGTGAATAGCCACTGTACTCCAGCC_ssc-mir-1285	0	0	6	37	15	14	4	0	0	0	100	0	0	0	0	31	3	0	0	0	0	3	8	1	1	1	0	4	0	1	3	113	15	9	2	0	371	10.3056	0
GTATCAGACTGATGTTGAC_hsa-mir-21	3	6	2	19	17	4	52	8	10	44	34	5	9	13	43	41	22	28	7	11	11	5	23	13	41	39	10	22	9	35	7	36	5	10	42	16	702	19.5	0
GTATGAATAAAGTCGTGATACTGTAAACGCTTTCTGATG_hsa-miR-3607-3p	7	6	5	16	21	6	7	13	20	32	26	7	11	17	34	33	10	20	26	4	27	2	20	2	19	19	22	28	14	9	5	51	8	4	33	12	596	16.5556	0
GTCAACACTTGCTGGTTTCCTCT_ssc-miR-505	10	23	22	11	34	70	27	41	18	8	36	42	14	9	28	15	19	23	7	21	9	23	19	25	14	12	9	22	20	27	14	24	77	13	20	19	825	22.9167	1
GTCGGCGTGGCGTCGGTCGTG_hsa-mir-1307	10	31	21	24	21	16	19	15	14	15	28	45	7	8	25	10	12	14	12	22	9	10	5	16	30	19	8	19	14	26	9	24	21	8	32	8	627	17.4167	0
GTCGGCGTGGCGTCGGTCGTGG_hsa-mir-1307	67	134	86	117	134	72	140	134	127	128	221	250	60	126	189	130	106	110	119	69	94	53	81	79	186	143	84	135	82	108	69	150	116	46	222	68	4235	117.639	1
GTCTGGTAACGATGTT_bta-miR-200a	9	8	4	28	18	21	37	5	17	25	51	3	11	16	24	32	28	22	2	11	8	4	13	21	35	36	6	15	17	28	15	44	13	4	34	13	678	18.8333	0
GTGAAATGTTTAGGAC_hsa-miR-203a-3p	77	15	12	9	9	7	19	6	68	21	17	7	5	14	17	19	6	21	27	73	17	12	5	20	10	6	7	10	9	17	7	23	9	0	16	7	624	17.3333	0
GTGAAATGTTTAGGACC_hsa-miR-203a-3p	4	11	12	40	23	17	60	12	13	56	40	6	11	19	69	38	33	44	10	24	16	3	37	21	70	52	24	38	21	29	11	59	13	12	72	8	1028	28.5556	1
GTGAAATGTTTAGGACCAC_hsa-miR-203a-3p	2	15	4	8	24	8	7	4	4	4	10	19	4	9	18	5	3	12	2	8	0	12	6	18	10	6	3	5	0	12	4	6	8	5	4	7	276	7.66667	0
GTGAAATGTTTAGGACCACA_hsa-miR-203a-3p	3	15	4	31	4	41	19	29	8	6	19	28	13	15	9	2	22	8	2	6	7	11	16	28	7	1	0	28	17	28	9	16	58	27	2	25	564	15.6667	0
GTGAAATGTTTAGGACCACC_hsa-miR-203a-3p	24	54	31	130	69	182	209	153	60	43	130	138	55	126	84	60	116	88	18	62	54	57	113	134	102	27	21	133	83	184	87	131	205	93	64	106	3426	95.1667	1
GTGAAATGTTTAGGACCACG_hsa-miR-203a-3p	3	12	4	2	8	18	4	11	27	0	9	9	4	61	4	4	49	5	0	6	36	8	5	9	5	1	3	6	4	11	8	9	20	18	1	11	395	10.9722	0
GTGAAATGTTTAGGACCACT_hsa-miR-203a-3p	151	578	284	398	608	833	663	517	303	296	655	1013	216	510	565	365	345	471	102	414	194	375	495	695	468	284	173	415	421	758	290	587	767	316	356	427	16308	453	1
GTGAAATGTTTAGGACCACTA_hsa-miR-203a-3p	38	162	64	38	163	160	89	99	51	52	158	272	13	79	128	71	43	112	13	152	24	121	44	100	86	42	34	50	76	132	38	139	148	45	81	54	3171	88.0833	1
GTGAAATGTTTAGGACCACTAA_hsa-miR-203a-3p	59	199	97	152	164	405	239	297	130	91	248	462	105	157	150	102	148	129	36	168	74	143	165	246	145	41	58	176	187	336	106	220	448	176	104	151	6314	175.389	1
GTGAAATGTTTAGGACCACTAC_hsa-miR-203a-3p	30	83	45	44	147	120	85	52	43	67	144	158	20	74	94	54	46	96	24	77	29	68	48	70	83	51	34	53	46	81	30	104	83	45	71	34	2433	67.5833	1
GTGAAATGTTTAGGACCACTAG_hsa-miR-203a-3p	1292	3710	2193	2327	5153	4365	3152	2933	1982	3143	5380	6864	914	2644	5389	3368	2304	3491	953	3842	1284	2837	2297	3319	3760	2199	1588	2296	2371	4375	1281	4754	3990	1673	3126	1651	108200	3005.56	1
GTGAAATGTTTAGGACCACTAGA_hsa-miR-203a-3p	142	471	236	199	419	387	276	307	171	218	464	851	89	243	485	295	120	268	111	340	122	279	203	277	266	150	142	170	201	314	102	395	384	161	257	134	9649	268.028	1
GTGAAATGTTTAGGACCACTAGC_hsa-miR-203a-3p	5	17	16	17	44	63	36	25	12	14	24	29	13	45	24	16	22	18	10	8	8	31	48	52	14	11	5	10	17	36	26	46	42	8	21	49	882	24.5	1
GTGAAATGTTTAGGACCACTAGG_hsa-miR-203a-3p	3	13	4	7	20	16	11	8	12	3	11	16	5	60	8	5	19	4	8	2	19	16	4	10	12	7	3	5	6	17	5	9	5	4	2	16	375	10.4167	0
GTGAAATGTTTAGGACCACTAGT_hsa-miR-203a-3p	17	108	53	71	260	290	104	86	38	43	126	106	70	136	153	79	53	80	22	52	31	154	164	264	86	43	24	43	74	125	81	186	154	41	74	118	3609	100.25	1
GTGAAATGTTTAGGACCACTAT_hsa-miR-203a-3p	6	23	11	24	33	82	52	35	18	5	35	32	20	42	15	15	25	21	8	19	19	33	39	45	18	4	4	34	26	40	23	41	45	29	12	26	959	26.6389	1
GTGATACTGTAAACGCTTTCTGATG_hsa-miR-3607-3p	17	17	8	19	36	5	10	12	16	35	50	8	10	10	52	31	24	29	53	13	41	11	21	6	38	30	15	45	28	16	9	57	7	5	66	16	866	24.0556	1
GTGATACTGTAAACGCTTTCTGATGTA_hsa-miR-3607-3p	12	13	3	27	34	4	17	25	25	61	48	7	8	11	88	61	29	25	62	6	27	5	20	2	24	46	33	26	18	24	5	77	12	7	69	10	971	26.9722	1
GTGCAAATCCATGCAAAACTG_ssc-miR-19b	9	14	10	5	27	21	5	13	7	3	20	55	4	11	12	17	5	19	3	22	3	20	9	16	8	6	5	8	5	10	6	18	30	7	10	3	446	12.3889	0
GTGCAAATCCATGCAAAACTGA_ssc-miR-19b	16	19	10	6	13	21	2	11	3	2	15	67	3	5	6	2	2	8	1	14	1	21	4	11	5	1	10	6	4	7	3	7	21	8	0	5	340	9.44444	0
GTGCAAATCCATGCAAAACTGT_ssc-miR-19a	4	13	15	8	21	39	14	17	7	4	16	34	3	10	6	11	5	16	1	11	3	17	9	31	15	4	5	12	10	14	16	23	30	11	13	16	484	13.4444	0
GTGCCGCCATTTTTTGAGTGT_ssc-mir-371	0	90	81	2	174	2	0	159	1	51	0	2	1	111	0	2	78	72	23	0	1	95	118	167	78	1	0	66	215	203	68	86	2	118	0	89	2156	59.8889	1
GTGGATGTACTTGCTTT_bta-mir-302a	6	6	4	63	41	17	96	26	32	45	36	4	29	28	98	39	36	36	38	14	16	6	24	11	52	56	19	58	19	54	30	83	20	11	63	29	1245	34.5833	1
GTGGCTCTCTGAAAG_ssc-mir-148b	2	8	9	8	39	29	9	17	9	16	43	54	12	13	11	8	15	11	4	15	2	16	15	17	10	4	17	31	16	13	6	18	1	6	25	8	537	14.9167	0
GTGGGATCGCGCCTGTG_ssc-mir-1285	100	44	36	92	104	44	123	54	90	51	94	12	57	123	104	44	78	113	125	55	163	15	112	25	88	45	70	98	35	101	65	114	35	26	136	51	2722	75.6111	1
GTGGGATCGCGCCTGTGAATAGCC_ssc-mir-1285	21	5	10	35	32	19	13	6	9	2	74	0	10	6	10	9	7	22	11	8	30	18	27	1	9	2	11	21	3	17	12	51	9	7	13	12	552	15.3333	0
GTGGGATCGCGCCTGTGAATAGCCACT_ssc-mir-1285	4	9	5	123	32	32	43	10	18	2	76	1	17	26	19	11	19	23	18	4	27	3	41	2	17	0	9	28	8	26	19	51	17	8	15	16	779	21.6389	1
GTGTACTCCAGCCTGGGCAACATAGCGAGACCCCGTCTCTT_ssc-miR-1285	19	3	3	14	25	23	26	10	24	4	26	0	12	27	15	16	8	50	32	15	39	5	34	1	19	1	13	28	21	28	13	35	9	13	10	13	634	17.6111	0
GTGTAGTTAGCTGATTGC_ssc-miR-34c	2	5	2	20	4	0	123	13	7	36	28	11	1	6	10	12	20	1	2	13	4	1	2	0	73	37	4	5	21	29	2	14	17	8	4	1	538	14.9444	0
GTGTGTGTCCGAGGAGG_ssc-mir-149	9	21	14	9	25	36	8	22	18	16	31	66	5	25	27	12	11	15	7	15	11	23	22	32	13	18	12	14	23	22	4	17	18	11	25	14	671	18.6389	0
GTTAGTACTTGGATG_hsa-mir-7641-2	62	51	51	193	56	28	109	36	62	213	132	19	35	131	169	70	70	103	172	40	170	18	36	64	194	191	34	83	49	107	44	125	41	10	110	24	3102	86.1667	1
GTTAGTACTTGGATGG_hsa-mir-7641-2	27	17	17	15	19	8	11	19	24	45	24	16	6	46	33	17	19	33	27	20	31	4	10	17	35	20	10	19	16	38	21	34	13	8	22	9	750	20.8333	1
GTTGGGATCGGTTGCAATGCT_hsa-miR-92a-1-5p	0	38	16	45	0	1	52	2	2	14	1	2	1	5	7	1	19	1	3	21	30	0	0	1	27	21	0	1	28	34	4	4	36	19	2	2	440	12.2222	0
GTTTTTCATTATTGCTCCTGACC_hsa-miR-335-3p	8	9	16	10	12	19	9	12	6	23	17	18	6	11	17	14	9	20	18	5	8	4	7	9	13	12	11	10	11	10	6	9	25	10	10	5	419	11.6389	0
TAAACATCCTCGACTGGAAGCT_bta-miR-30a-5p	1	11	4	20	9	5	47	7	12	11	26	14	5	12	10	11	17	11	4	12	9	4	10	6	38	11	3	4	10	19	11	21	29	10	18	15	467	12.9722	0
TAAACATCCTTGACTGGAAGCC_ssc-miR-30e-5p	3	8	10	21	13	32	15	29	9	8	18	17	8	13	9	8	10	10	6	7	9	2	14	14	9	8	5	15	15	19	14	20	23	10	8	9	448	12.4444	0
TAAACATCCTTGACTGGAAGCT_ssc-miR-30e-5p	30	60	50	50	58	115	80	71	52	29	110	138	23	55	59	30	37	60	16	52	22	43	43	72	53	28	31	59	50	57	43	60	96	49	45	51	1977	54.9167	1
TAAACGTGGATGTAC_hsa-miR-302a-5p	11	9	5	19	17	8	50	8	9	26	26	1	10	26	81	44	17	26	20	4	12	3	17	7	47	38	14	30	13	25	15	56	4	5	63	22	788	21.8889	1
TAAACGTGGATGTACT_hsa-miR-302a-5p	15	24	10	72	46	25	137	37	54	59	78	13	54	78	163	68	64	50	37	16	34	8	53	17	66	85	35	60	35	88	59	105	11	17	119	45	1937	53.8056	1
TAAACGTGGATGTACTTGC_hsa-miR-302a-5p	13	39	30	32	58	28	70	42	35	56	50	48	38	52	134	68	47	69	32	42	18	12	35	22	53	77	23	32	35	58	27	74	43	17	82	21	1612	44.7778	1
TAAACGTGGATGTACTTGCA_hsa-miR-302a-5p	6	8	9	28	12	18	30	19	13	6	13	13	11	15	10	6	18	5	2	5	10	4	24	15	9	2	2	18	8	28	17	19	30	11	14	23	481	13.3611	0
TAAACGTGGATGTACTTGCC_hsa-miR-302a-5p	17	38	38	107	62	73	166	109	64	44	85	60	35	109	86	62	89	81	39	31	44	24	71	70	81	40	27	75	57	118	60	85	78	40	89	66	2420	67.2222	1
TAAACGTGGATGTACTTGCCTT_hsa-miR-302a-5p	11	31	26	19	41	44	52	49	22	23	52	49	14	32	73	28	20	34	17	35	16	16	18	22	28	19	17	22	26	27	31	55	34	20	45	25	1093	30.3611	1
TAAACGTGGATGTACTTGCT_hsa-miR-302a-5p	91	279	205	297	321	312	539	328	281	193	389	265	183	367	593	356	289	323	161	287	127	138	286	296	326	271	139	272	275	453	229	440	273	119	442	235	10380	288.333	1
TAAACGTGGATGTACTTGCTA_hsa-miR-302a-5p	14	32	16	60	19	67	88	82	41	11	46	22	32	71	32	13	40	10	5	25	21	15	47	41	31	9	1	50	28	56	34	42	105	38	16	34	1294	35.9444	1
TAAACGTGGATGTACTTGCTC_hsa-miR-302a-5p	66	169	148	621	186	518	790	633	400	136	353	148	265	511	365	200	414	220	101	168	229	96	393	400	256	134	86	388	352	459	373	511	530	250	263	364	11496	319.333	1
TAAACGTGGATGTACTTGCTG_hsa-miR-302a-5p	7	24	12	23	17	25	31	23	127	4	14	8	10	200	15	10	139	2	5	19	94	9	14	20	26	4	5	16	23	27	25	29	30	19	10	27	1093	30.3611	1
TAAACGTGGATGTACTTGCTT_hsa-miR-302a-5p	837	1748	1355	1932	2192	2339	2810	2343	1798	1116	2456	2017	969	2325	3742	2031	1390	2108	807	1964	845	1068	1407	1801	1792	1236	816	1470	1614	2298	1378	3297	2330	950	2293	1568	64442	1790.06	1
TAAACGTGGATGTACTTGCTTT_bta-mir-302a	5275	9791	6605	9926	10636	12070	14645	14811	10538	5903	14034	12857	4911	11465	21679	10356	7680	10057	5312	9956	4544	5339	6366	9213	8840	6604	4610	8147	7642	11709	6518	15204	13252	4897	11039	7217	339648	9434.67	1
TAAACGTGGATGTACTTGCTTTA_bta-mir-302a	116	257	126	118	195	170	180	237	165	89	231	383	67	184	329	157	59	164	88	175	74	119	62	136	109	77	111	111	112	165	88	264	195	97	134	82	5426	150.722	1
TAAAGTGCTGACAGT_bta-miR-106b	6	3	9	17	15	17	24	14	11	17	25	21	14	11	15	19	18	19	3	11	4	4	12	10	31	11	4	18	21	34	11	30	18	8	17	13	535	14.8611	0
TAAAGTGCTGACAGTGCAGAT_bta-miR-106b	5	14	8	4	20	39	9	18	11	2	22	66	2	10	14	3	10	14	2	29	4	16	12	22	7	3	3	6	9	20	6	9	48	11	7	12	497	13.8056	0
TAAAGTGCTGACAGTGCAGATA_bta-miR-106b	44	95	71	22	102	127	32	75	51	27	95	388	12	31	43	38	13	58	14	117	15	75	35	91	27	26	32	23	49	53	31	55	143	29	20	24	2183	60.6389	1
TAAAGTGCTTATAGTGCAGGC_ssc-miR-20a	8	8	6	10	13	35	18	19	5	2	20	29	5	20	12	8	10	13	5	19	13	10	16	24	12	2	8	17	14	19	15	19	49	19	4	15	521	14.4722	0
TAAAGTGCTTATAGTGCAGGT_ssc-miR-20a	28	76	44	35	88	166	50	111	46	24	104	281	24	53	43	43	27	43	12	83	23	72	47	76	60	17	24	39	44	65	33	99	164	48	26	34	2252	62.5556	1
TAAAGTGCTTATAGTGCAGGTA_ssc-miR-20a	7	30	17	4	31	25	4	21	4	4	23	110	4	9	9	8	3	14	0	36	4	29	8	20	9	3	9	1	4	22	4	16	42	12	14	8	568	15.7778	0
TAAAGTGCTTATAGTGCAGGTAA_ssc-miR-20a	53	161	98	122	118	481	108	340	136	40	216	472	74	125	70	56	62	74	23	136	61	122	113	243	83	20	36	154	135	229	100	170	590	160	33	126	5340	148.333	1
TAAAGTGCTTATAGTGCAGGTAC_ssc-miR-20a	12	23	37	15	32	34	15	24	11	18	58	75	14	18	31	14	5	33	7	38	7	22	14	19	22	8	11	12	16	21	7	50	34	11	21	7	796	22.1111	1
TAAAGTGCTTATAGTGCAGGTAG_ssc-miR-20a	1728	3812	3271	1417	5312	5567	1661	4149	2242	1678	5476	11091	863	2302	3450	2210	1100	2927	707	4974	980	4165	1526	3240	2197	1117	1446	1747	2064	3270	1257	4153	5598	1541	1826	1650	103714	2880.94	1
TAAAGTGCTTATAGTGCAGGTAGA_ssc-miR-20a	178	447	272	163	394	452	175	391	226	157	515	1017	72	212	308	258	98	254	78	397	85	312	134	211	199	82	137	162	177	300	88	333	498	159	166	119	9226	256.278	1
TAAAGTGCTTATAGTGCAGGTAGG_ssc-miR-20a	13	25	8	7	23	20	7	18	22	5	18	31	8	38	10	8	15	11	1	23	17	13	8	16	10	1	6	10	10	12	8	13	20	7	7	10	479	13.3056	0
TAAAGTGCTTATAGTGCAGGTAGT_ssc-miR-20a	5	25	12	8	18	24	19	23	7	3	25	33	3	11	8	2	4	7	3	11	4	15	9	10	6	4	4	5	15	13	9	19	29	12	5	8	418	11.6111	0
TAAAGTGCTTATAGTGCAGGTAT_ssc-miR-20a	2	7	5	22	12	57	18	49	13	0	5	7	9	19	0	1	15	1	2	2	8	3	18	21	7	1	1	20	21	30	13	6	78	20	1	18	512	14.2222	0
TAACACTGTCTGGTAAAGAT_bta-miR-141	4	18	7	7	16	10	57	9	12	9	45	52	16	13	11	5	18	35	0	22	6	7	13	20	44	15	2	1	16	24	16	9	76	10	9	31	665	18.4722	0
TAACACTGTCTGGTAAAGATG_bta-miR-141	3	41	16	9	29	23	43	17	9	13	59	99	11	19	8	10	15	15	1	79	1	22	8	36	45	22	5	7	22	17	13	15	85	23	14	25	879	24.4167	1
TAACACTGTCTGGTAAAGATGGC_bta-miR-141	3	34	5	7	15	9	30	5	3	5	22	50	6	4	5	1	10	10	0	32	4	8	3	8	24	13	3	3	1	16	13	6	45	11	3	11	428	11.8889	0
TAACACTGTCTGGTAAC_bta-miR-200a	44	141	68	779	471	307	1481	111	307	1118	1007	122	549	549	1409	1289	907	574	197	226	224	62	549	228	1289	1661	243	459	270	621	330	1224	184	105	1412	267	20784	577.333	1
TAACACTGTCTGGTAACG_bta-miR-200a	11	66	42	114	128	71	186	30	48	150	224	71	87	97	287	163	131	122	45	97	37	33	96	50	212	252	46	73	61	109	70	194	86	25	199	60	3773	104.806	1
TAACACTGTCTGGTAACGA_bta-miR-200a	6	19	9	14	18	15	23	5	5	15	23	25	9	5	18	4	6	25	0	12	0	14	9	18	26	16	4	4	5	14	17	21	39	6	17	19	485	13.4722	0
TAACACTGTCTGGTAACGAC_bta-miR-200a	4	10	11	54	12	34	102	14	24	17	44	18	46	33	16	20	53	36	6	19	9	8	37	34	26	24	6	33	22	49	36	37	73	21	23	45	1056	29.3333	1
TAACACTGTCTGGTAACGAT_bta-miR-200a	25	131	48	147	139	144	354	63	95	111	269	198	130	150	150	120	139	156	16	135	38	50	116	106	265	141	45	76	75	175	121	209	317	64	167	207	4892	135.889	1
TAACACTGTCTGGTAACGATA_bta-miR-200a	6	43	17	32	29	61	148	17	23	10	48	113	45	43	28	9	50	16	6	33	16	33	29	50	52	21	8	22	33	65	71	32	188	40	10	52	1499	41.6389	1
TAACACTGTCTGGTAACGATG_bta-miR-200a	123	1091	323	403	856	685	1435	287	341	525	1427	1999	489	721	771	552	653	603	88	1101	189	454	363	557	1321	953	208	213	298	736	541	777	1478	349	624	517	24051	668.083	1
TAACACTGTCTGGTAACGATGA_bta-miR-200a	9	50	17	38	16	107	107	38	18	10	65	81	44	55	15	8	43	11	3	28	12	16	37	45	41	5	9	19	26	54	62	22	251	34	8	29	1433	39.8056	1
TAACACTGTCTGGTAACGATGC_bta-miR-200a	61	337	140	474	279	872	1231	297	303	194	754	642	393	533	273	210	523	219	45	392	179	218	485	424	514	251	94	213	323	610	483	524	1717	372	219	373	15171	421.417	1
TAACACTGTCTGGTAACGATGCT_hsa-miR-200a-3p	5	31	22	21	46	114	41	30	30	16	53	82	26	29	31	7	24	18	3	45	10	24	55	30	25	13	4	21	28	38	33	43	151	24	18	23	1214	33.7222	1
TAACACTGTCTGGTAACGATGG_bta-miR-200a	5	53	10	9	26	50	44	17	108	12	43	52	18	213	10	8	224	12	5	23	75	21	23	27	58	12	3	4	17	48	18	21	116	25	9	48	1467	40.75	1
TAACACTGTCTGGTAACGATGGT_hsa-miR-200a-3p	0	18	9	4	17	80	19	20	12	7	46	41	15	13	4	9	16	9	0	29	3	18	32	22	17	3	0	7	16	38	16	13	102	28	8	10	701	19.4722	0
TAACACTGTCTGGTAACGATGT_bta-miR-200a	339	2845	910	1369	1921	3569	4130	1187	1184	981	3984	4679	1305	1954	1704	1285	1572	1259	182	2937	550	1328	1491	1702	2473	1326	490	755	1132	2415	1755	2163	6562	1273	1038	1433	67182	1866.17	1
TAACACTGTCTGGTAACGATGTA_hsa-miR-200a-3p	46	213	54	149	85	541	275	164	147	55	253	481	117	186	86	64	161	65	10	181	68	82	199	204	118	49	26	118	115	236	152	174	1067	162	44	95	6242	173.389	1
TAACACTGTCTGGTAACGATGTC_hsa-miR-200a-3p	287	1357	560	2029	1101	4620	3158	1651	1545	654	3114	3199	1398	1909	1236	992	2153	803	188	1588	615	808	1930	1985	1292	748	356	1387	1283	2708	1535	2312	7890	1375	752	1157	61675	1713.19	1
TAACACTGTCTGGTAACGATGTG_hsa-miR-200a-3p	10	191	40	47	56	233	89	65	356	16	128	152	58	585	35	27	686	24	5	100	217	40	89	97	112	16	17	48	56	118	67	74	383	52	17	69	4375	121.528	1
TAACACTGTCTGGTAACGATGTT_bta-miR-200a	2318	11835	4482	5931	10649	19924	11478	6299	6592	4666	18104	30450	4610	7641	9929	7454	6859	5611	1094	14722	2389	7296	7228	8572	7596	5398	2589	4364	4552	10524	5186	12416	30903	5101	5329	4404	314495	8735.97	1
TAACACTGTCTGGTAACGATGTTA_bta-miR-200a	21	64	15	19	40	78	37	27	22	21	81	170	14	33	42	37	20	47	9	75	9	38	27	30	30	26	10	17	11	37	31	56	92	16	27	14	1343	37.3056	1
TAACACTGTCTGGTAACGATGTTC_bta-miR-200a	4	24	8	30	23	56	51	24	14	6	51	37	30	33	21	8	32	18	4	13	9	15	27	29	19	8	6	14	16	57	29	32	94	24	19	26	911	25.3056	1
TAACACTGTCTGGTAACGATGTTT_bta-miR-200a	12	191	51	63	149	208	189	78	51	54	212	213	76	110	91	62	76	88	17	142	30	94	93	131	109	75	22	31	60	129	121	142	370	80	56	102	3778	104.944	1
TAACACTGTCTGGTAAT_bta-miR-200a	0	6	4	100	13	42	171	14	32	35	42	8	66	67	28	26	127	7	12	2	16	1	73	23	55	32	7	47	17	78	39	59	15	20	33	21	1338	37.1667	1
TAAGACTTGCAGTGATGTTT_ssc-miR-499-5p	2	6	15	13	21	24	21	11	10	3	18	13	5	13	12	4	11	19	1	14	7	9	9	20	11	7	5	5	2	13	10	10	19	8	9	9	389	10.8056	0
TAAGACTTGCAGTGATGTTTA_ssc-miR-499-5p	15	33	37	16	39	66	17	52	23	10	29	101	3	13	30	12	8	40	5	43	6	27	9	28	14	11	14	13	12	9	4	36	55	16	18	14	878	24.3889	1
TAAGCAGGGTCGGGC_hsa-mir-7641-2	55	32	23	6	35	32	20	55	50	28	51	13	14	48	37	15	10	23	47	28	44	20	22	49	47	17	12	43	22	53	14	35	32	15	12	21	1080	30	1
TAAGCAGGGTCGGGCC_hsa-mir-7641-2	149	83	100	17	125	99	61	183	137	70	146	29	37	107	103	19	38	71	40	123	81	45	80	130	80	41	47	111	68	145	55	94	71	34	41	61	2921	81.1389	1
TAAGGTGCATCTAGTGCAGAT_ssc-miR-18a	12	16	9	6	21	30	7	23	10	4	13	45	1	6	12	14	4	11	6	17	0	11	8	13	13	7	2	10	12	18	10	11	33	10	4	5	434	12.0556	0
TAAGGTGCATCTAGTGCAGATA_ssc-miR-18a	9	18	11	2	23	15	2	23	2	7	13	64	1	3	7	9	1	13	2	27	1	25	4	16	7	5	4	8	4	20	2	17	20	3	2	2	392	10.8889	0
TAAGGTGCATCTAGTGCAGATAA_ssc-miR-18a	11	9	8	17	11	43	10	21	11	3	19	55	7	12	14	1	10	8	3	17	3	7	8	30	8	3	4	11	13	24	8	19	71	8	4	7	518	14.3889	0
TAAGGTGCATCTAGTGCAGATAG_ssc-miR-18a	197	421	358	148	503	568	171	386	214	225	586	1340	61	215	348	249	120	373	73	636	95	391	144	337	273	134	156	186	218	384	102	461	571	151	184	174	11153	309.806	1
TAAGGTGCATCTAGTGCAGATAGA_ssc-miR-18a	9	7	13	1	8	20	2	13	4	2	13	53	1	5	5	3	1	13	4	26	3	12	0	3	2	2	1	8	4	4	1	9	24	6	0	1	283	7.86111	0
TAAGTGCTTCCATGCTTTAGT_hsa-miR-302e	12	60	44	32	35	55	40	54	35	20	51	93	12	42	62	23	18	38	13	41	11	18	29	37	32	21	17	27	33	51	27	54	63	27	29	17	1273	35.3611	1
TAAGTGCTTCCATGCTTTAGTAG_hsa-miR-302e	121	198	166	80	240	177	128	164	108	94	246	404	42	120	282	122	55	169	75	240	41	124	53	134	138	76	90	96	110	149	64	268	205	50	144	95	5068	140.778	1
TAAGTGCTTCCATGCTTTAGTAGA_hsa-miR-302e	9	42	13	8	33	16	21	26	19	9	38	56	7	21	71	19	12	28	16	16	5	13	8	12	22	26	16	24	10	18	10	35	16	7	34	14	750	20.8333	1
TAAGTGCTTCCATGCTTTAGTGA_hsa-miR-302e	6	41	19	9	29	22	18	21	20	13	20	54	2	7	30	17	9	12	8	19	5	13	11	16	18	7	9	12	17	6	4	28	19	5	25	7	578	16.0556	0
TAAGTGCTTCCATGTTTC_bta-miR-302c	18	75	31	134	47	163	146	134	74	23	92	120	67	122	89	57	90	36	26	40	36	33	75	95	64	31	24	77	87	140	77	93	143	51	68	72	2750	76.3889	1
TAAGTGCTTCCATGTTTCAGC_bta-miR-302c	5	15	7	15	12	19	31	25	15	10	17	29	10	13	29	13	12	11	3	9	2	6	21	25	13	6	6	24	28	26	12	19	14	4	17	20	543	15.0833	0
TAAGTGCTTCCATGTTTCAGT_bta-miR-302c	48	113	63	40	112	100	95	82	51	46	117	229	45	104	151	89	46	58	30	107	20	52	70	69	68	45	35	49	71	94	42	116	95	39	101	65	2757	76.5833	1
TAAGTGCTTCCATGTTTCAGTG_bta-miR-302c	50	246	147	66	185	132	131	144	105	83	182	402	70	170	259	150	62	121	32	214	46	87	62	99	154	117	89	61	87	173	64	164	148	56	144	77	4579	127.194	1
TAAGTGCTTCCATGTTTCAGTGA_bta-miR-302c	22	107	45	48	48	84	47	79	36	25	83	271	22	57	101	53	31	47	18	84	24	37	34	57	51	30	21	43	48	54	27	78	108	22	49	34	2025	56.25	1
TAAGTGCTTCCATGTTTCAGTGC_bta-miR-302c	9	26	14	7	17	24	15	17	8	8	21	55	8	17	42	28	10	18	3	33	7	6	11	11	12	9	6	12	11	18	6	33	16	7	19	10	574	15.9444	0
TAAGTGCTTCCATGTTTCAGTGG_bta-miR-302c	296	815	437	243	546	557	395	592	322	252	768	2075	145	381	958	539	260	501	189	823	121	262	211	424	455	346	272	274	339	536	242	712	672	181	465	272	16878	468.833	1
TAAGTGCTTCCATGTTTCAGTGGA_bta-miR-302c	10	17	17	2	17	20	16	19	6	16	23	56	5	10	31	13	8	16	10	23	2	6	10	17	17	8	11	7	12	18	10	22	15	4	14	5	513	14.25	0
TAAGTGCTTCCATGTTTCAGTGGC_bta-miR-302c	3	20	9	19	15	29	24	26	13	8	23	26	19	18	42	29	13	13	4	20	7	8	32	28	11	10	5	13	21	26	28	31	32	8	20	21	674	18.7222	0
TAAGTGCTTCCATGTTTCAGTGGT_bta-miR-302c	27	97	59	47	116	170	91	104	66	40	131	193	43	98	220	150	55	67	26	87	21	71	114	146	78	54	38	64	80	121	72	149	134	42	124	78	3273	90.9167	1
TAAGTGCTTCCATGTTTCAGTGT_bta-miR-302c	11	39	22	34	28	56	52	62	36	15	34	57	20	52	41	22	17	19	11	27	15	18	29	19	16	12	14	20	29	36	27	43	53	22	27	36	1071	29.75	1
TAAGTGCTTCCATGTTTT_bta-miR-302d	215	702	387	358	599	660	630	685	403	261	681	1343	207	586	795	459	274	437	127	532	147	305	396	509	412	228	207	358	367	641	292	628	690	251	439	370	16581	460.583	1
TAAGTGCTTCCATGTTTTAG_bta-miR-302d	52	134	76	40	119	80	62	97	56	46	110	264	19	84	136	90	33	84	18	132	18	60	44	63	100	53	41	41	52	82	33	91	69	34	99	57	2669	74.1389	1
TAAGTGCTTCCATGTTTTAGA_bta-miR-302d	56	177	93	152	100	349	249	361	169	44	167	334	81	206	93	56	96	56	36	112	83	89	121	223	79	28	31	144	147	239	136	148	492	174	45	130	5296	147.111	1
TAAGTGCTTCCATGTTTTAGC_bta-miR-302d	1211	2339	1701	2776	2190	4321	4009	5102	2433	1015	3392	4403	1540	2907	3105	1643	1805	1867	856	2306	1186	1246	2034	3040	1810	1086	900	2653	2385	3591	2087	3860	5362	1709	1826	2244	87940	2442.78	1
TAAGTGCTTCCATGTTTTAGCAG_bta-miR-302d	56	112	91	54	109	102	92	114	64	41	131	230	21	75	135	75	45	74	38	138	11	54	46	83	65	45	30	43	42	73	33	139	125	30	69	46	2731	75.8611	1
TAAGTGCTTCCATGTTTTAGCAGA_bta-miR-302d	5	43	12	10	9	10	17	12	5	5	11	32	7	8	24	21	3	16	16	11	3	7	6	6	26	13	10	6	8	8	8	18	10	3	19	7	435	12.0833	0
TAAGTGCTTCCATGTTTTAGCGA_bta-miR-302d	4	27	19	5	22	17	11	19	16	9	20	45	2	7	29	16	5	16	1	19	4	17	12	15	16	7	12	3	11	19	4	13	14	13	16	6	491	13.6389	0
TAAGTGCTTCCATGTTTTAGG_bta-miR-302d	62	352	124	106	126	282	143	256	926	50	175	312	75	1176	121	65	736	74	28	166	523	82	112	196	185	28	46	133	118	211	108	150	354	118	55	237	8011	222.528	1
TAAGTGCTTCCATGTTTTAGT_bta-miR-302d	7546	19386	11685	9242	15361	19777	15802	20224	11756	5790	17978	34497	5420	12746	20770	10142	6379	10401	4562	16613	4669	8675	7944	14119	9683	5875	5170	9117	9458	15467	7648	18222	22217	7115	9913	9101	440470	12235.3	1
TAAGTGCTTCCATGTTTTAGTA_bta-miR-302b	592	1477	1011	418	1428	1338	665	1232	605	435	1387	3541	277	815	1431	845	283	997	256	1583	221	919	471	894	706	474	484	443	572	887	417	1252	1333	357	771	491	31308	869.667	1
TAAGTGCTTCCATGTTTTAGTAA_bta-miR-302d	1463	3680	2099	2434	2153	5154	3034	5627	2511	890	3634	7594	1351	2876	2649	1240	1505	1785	807	2801	1082	1542	1659	3464	1665	813	857	2444	2424	3478	1981	3616	7447	1914	1404	2059	93136	2587.11	1
TAAGTGCTTCCATGTTTTAGTAAA_bta-miR-302d	13	27	14	10	19	27	16	18	5	5	12	41	7	26	15	13	5	22	3	11	6	13	6	9	17	10	8	9	8	15	7	15	14	1	17	8	472	13.1111	0
TAAGTGCTTCCATGTTTTAGTAC_bta-miR-302d	453	447	446	243	583	338	289	382	193	341	795	1041	116	248	859	389	161	530	221	760	130	353	160	264	464	243	265	259	188	295	183	871	512	145	411	159	13737	381.583	1
TAAGTGCTTCCATGTTTTAGTAG_bta-miR-302b	42546	73271	56395	28964	75137	61471	41050	66521	42277	31718	85480	141965	16490	45034	106587	46454	21116	57619	23484	88496	17705	45244	20033	47080	46333	31203	28431	31896	34130	48767	23126	89935	74908	20193	50376	28349	1789784	49716.2	1
TAAGTGCTTCCATGTTTTAGTAGA_bta-miR-302b	3935	12403	5631	5699	9757	6087	8028	7582	5294	5695	11313	17682	2996	6514	17556	9951	3385	8421	4335	7505	2752	3903	3991	4889	7869	6874	4598	4968	5055	7326	3415	12075	5725	2469	10340	3851	249869	6940.81	1
TAAGTGCTTCCATGTTTTAGTAGAA_bta-miR-302b	147	272	208	163	249	135	182	222	129	139	278	500	76	161	332	186	88	221	106	253	85	99	83	117	185	133	128	135	141	172	88	276	160	62	224	84	6219	172.75	1
TAAGTGCTTCCATGTTTTAGTAGAAA_bta-miR-302b	22	46	26	12	24	20	19	35	15	15	24	62	4	13	29	16	7	15	12	20	6	14	4	10	18	18	15	11	12	22	13	30	15	8	37	12	681	18.9167	0
TAAGTGCTTCCATGTTTTAGTAGC_bta-miR-302b	16	47	31	58	57	114	88	86	53	27	78	70	44	79	54	39	33	49	19	49	25	43	70	69	44	28	24	49	74	102	62	103	84	39	62	49	2018	56.0556	1
TAAGTGCTTCCATGTTTTAGTAGG_bta-miR-302b	50	226	75	110	109	98	97	135	381	47	120	179	73	628	117	76	416	73	43	96	295	36	82	66	158	49	36	89	92	118	66	117	106	52	86	124	4721	131.139	1
TAAGTGCTTCCATGTTTTAGTAGT_bta-miR-302b	97	309	227	278	459	662	382	426	285	155	385	510	193	439	411	265	185	227	83	296	142	270	368	325	237	132	116	204	293	402	254	434	374	146	268	245	10484	291.222	1
TAAGTGCTTCCATGTTTTAGTAT_bta-miR-302d	35	178	134	427	121	645	429	726	306	34	261	159	188	331	94	63	219	65	66	79	190	64	256	344	139	30	30	379	339	388	269	320	919	221	57	274	8779	243.861	1
TAAGTGCTTCCATGTTTTAGTC_bta-miR-302d	6	16	17	13	18	20	4	14	6	8	14	26	9	15	15	18	11	8	5	19	5	12	9	14	10	10	7	11	11	12	4	16	21	10	9	6	429	11.9167	0
TAAGTGCTTCCATGTTTTAGTG_bta-miR-302d	628	2763	1217	520	2127	1603	989	1602	1021	639	1753	4890	453	1562	2424	1544	533	1302	329	1895	378	1039	750	1015	1137	746	698	603	762	1240	591	1620	1254	428	1392	629	44076	1224.33	1
TAAGTGCTTCCATGTTTTAGTGA_bta-miR-302a	2875	12186	4848	2742	8564	6728	4954	6691	3697	3434	8237	20141	2008	4840	12079	7308	2447	5243	1928	7743	1510	3903	3151	4259	5066	3752	3082	3212	4279	6117	2393	8175	6820	2131	6000	2819	195362	5426.72	1
TAAGTGCTTCCATGTTTTAGTGAA_bta-miR-302a	92	367	177	97	228	134	114	198	91	94	225	537	52	130	307	177	59	120	68	204	42	93	56	99	112	132	72	71	119	164	69	188	166	61	157	82	5154	143.167	1
TAAGTGCTTCCATGTTTTAGTGAAA_bta-miR-302a	20	64	39	24	40	30	20	39	28	17	41	111	6	28	52	30	14	35	16	35	7	19	14	15	30	23	21	18	26	32	14	32	31	22	27	11	1031	28.6389	1
TAAGTGCTTCCATGTTTTAGTGAC_bta-miR-302a	3	15	4	8	20	17	11	15	10	3	18	24	7	23	15	5	4	8	6	5	8	12	8	17	5	4	7	9	16	12	11	5	8	5	5	8	361	10.0278	0
TAAGTGCTTCCATGTTTTAGTGAT_bta-miR-302a	6	26	16	19	43	49	20	36	14	12	35	47	12	41	43	26	19	25	7	31	8	19	34	26	19	8	4	21	28	34	15	34	41	12	20	21	871	24.1944	1
TAAGTGCTTCCATGTTTTAGTGC_bta-miR-302d	193	661	294	531	485	783	872	1013	592	264	809	1150	278	575	856	515	432	335	165	505	224	202	512	533	508	306	224	488	537	757	387	720	953	323	498	398	18878	524.389	1
TAAGTGCTTCCATGTTTTAGTGG_bta-miR-302d	142	496	234	142	269	356	213	329	662	137	377	580	100	904	371	194	548	194	82	337	357	158	150	208	248	122	112	157	212	353	110	393	434	137	192	225	10235	284.306	1
TAAGTGCTTCCATGTTTTAGTGGA_bta-miR-302d	16	32	14	13	25	13	29	12	18	13	32	46	5	16	43	16	9	29	6	31	2	12	12	8	16	15	13	15	9	18	5	36	19	3	21	6	628	17.4444	0
TAAGTGCTTCCATGTTTTAGTGT_bta-miR-302d	869	3276	1406	1374	2117	2785	2792	3111	2002	1006	2782	5074	950	1950	3543	2066	1217	1256	624	2271	659	899	1519	1917	1724	1205	946	1439	1863	2640	1071	2476	3048	1088	1641	1203	67809	1883.58	1
TAAGTGCTTCCATGTTTTAGTGTA_bta-miR-302d	5	23	13	2	21	10	14	14	11	4	16	56	8	13	11	19	4	14	4	21	11	8	8	15	12	9	7	13	11	7	8	18	22	6	12	11	461	12.8056	0
TAAGTGCTTCCATGTTTTAGTGTT_bta-miR-302d	1	27	10	11	15	11	17	16	14	3	15	21	3	10	19	13	10	14	2	9	8	11	8	17	6	4	7	7	17	22	9	20	23	7	9	3	419	11.6389	0
TAAGTGCTTCCATGTTTTAGTT_bta-miR-302d	10	30	10	37	16	48	37	66	27	5	23	36	15	41	7	9	31	9	3	7	5	6	31	35	10	3	3	33	26	33	28	24	62	19	14	26	825	22.9167	1
TAAGTGCTTCCATGTTTTAGTTC_bta-miR-302d	5	19	8	4	17	19	11	7	7	3	10	35	3	13	7	12	3	11	4	24	1	8	10	22	3	1	5	1	8	9	8	25	11	5	3	7	349	9.69444	0
TAAGTGCTTCCATGTTTTAGTTG_bta-miR-302d	24	46	24	16	30	46	28	42	33	12	46	77	12	36	48	14	16	35	9	57	12	18	15	38	30	18	21	18	18	33	11	55	41	7	24	29	1039	28.8611	1
TAAGTGCTTCCATGTTTTGGT_hsa-miR-302a-3p	17	57	25	27	39	43	29	45	28	13	40	97	16	29	49	30	12	28	7	45	9	13	20	23	28	12	17	22	18	36	16	43	50	18	27	22	1050	29.1667	1
TAAGTGCTTCCATGTTTTGGTGA_hsa-miR-302a-3p	8	26	8	6	23	15	6	19	8	5	21	52	5	4	12	13	5	3	1	17	4	10	5	9	21	10	5	9	9	10	4	16	17	3	13	4	406	11.2778	0
TAATACTGCCGGGTAATGAC_bta-miR-200c	0	11	4	12	4	11	40	5	7	6	16	14	10	10	3	1	15	5	0	5	5	3	4	8	16	5	2	2	11	10	3	6	60	11	1	14	340	9.44444	0
TAATACTGCCGGGTAATGAT_bta-miR-200c	4	132	28	31	24	22	183	42	38	16	101	128	25	57	22	5	46	14	2	70	15	27	15	34	86	36	9	14	39	56	51	26	199	55	17	61	1730	48.0556	1
TAATACTGCCGGGTAATGATA_bta-miR-200c	3	98	15	19	11	20	105	29	17	15	65	73	22	25	4	9	29	7	1	38	8	17	12	20	34	21	4	11	31	40	25	13	159	37	5	45	1087	30.1944	1
TAATACTGCCGGGTAATGATG_bta-miR-200c	83	1336	201	235	305	223	1014	272	249	338	885	923	208	396	198	86	313	255	47	465	133	237	93	229	938	419	104	118	270	383	303	226	1169	234	183	311	13382	371.722	1
TAATACTGCCGGGTAATGATGA_bta-miR-200c	6	87	15	10	13	27	35	22	6	14	61	76	13	27	3	4	23	13	1	22	8	15	9	10	27	15	3	2	11	28	25	13	188	28	4	16	880	24.4444	1
TAATACTGCCGGGTAATGATGG_bta-miR-200c	35	902	179	62	154	140	350	159	117	83	471	766	49	166	39	29	149	90	8	379	52	154	46	99	266	121	28	29	130	171	100	117	1038	203	60	167	7108	197.444	1
TAATACTGCCGGGTAATGATGGA_bta-miR-200c	362	9925	1383	1249	1921	1281	5851	1631	1329	1948	5923	6095	1093	1751	1135	519	1944	1227	228	3319	571	1400	506	1294	5042	2614	501	622	1647	2545	1510	1385	9472	1999	980	2331	84533	2348.14	1
TAATACTGCCGGGTAATGATGGAA_bta-miR-200c	32	555	98	69	108	68	388	118	96	109	415	358	70	98	103	40	155	80	13	244	42	88	25	68	321	227	39	40	124	156	81	95	606	151	72	111	5463	151.75	1
TAATACTGCCGGGTAATGATGGAAT_bta-miR-200c	2	53	15	7	11	7	50	11	3	8	28	19	1	12	2	2	24	6	1	20	2	6	6	13	32	17	1	2	8	12	5	4	80	12	5	16	503	13.9722	0
TAATACTGCCGGGTAATGATGGAC_bta-miR-200c	2	53	6	28	16	21	103	14	14	13	50	24	20	32	5	4	56	4	1	12	16	10	11	19	45	21	2	17	19	30	35	15	120	39	12	36	925	25.6944	1
TAATACTGCCGGGTAATGATGGAT_bta-miR-200c	6	499	43	81	98	83	396	90	32	83	289	184	84	107	32	20	161	47	9	90	35	51	49	100	219	132	22	32	93	119	104	49	488	117	55	152	4251	118.083	1
TAATACTGCCGGGTAATGATGGATT_bta-miR-200c	0	84	5	7	22	12	37	2	11	12	25	19	7	13	3	4	28	5	2	8	7	7	5	9	22	12	1	3	9	15	15	2	56	21	5	23	518	14.3889	0
TAATACTGCCGGGTAATGATGGC_bta-miR-200c	3	27	9	9	6	5	47	15	6	4	33	37	9	10	4	1	14	7	1	15	6	1	6	6	26	8	0	5	4	23	9	7	59	16	6	10	454	12.6111	0
TAATACTGCCGGGTAATGATGGG_bta-miR-200c	9	233	25	25	16	29	114	29	116	24	98	72	30	216	8	6	285	13	1	51	68	24	8	24	118	30	6	11	39	56	28	23	216	60	5	84	2200	61.1111	1
TAATACTGCCGGGTAATGATGGT_bta-miR-200c	6	163	27	44	57	42	195	39	31	34	100	86	48	52	6	14	80	21	9	69	21	25	31	42	97	48	10	18	56	66	60	17	325	80	21	74	2114	58.7222	1
TAATACTGCCGGGTAATGATGT_bta-miR-200c	7	92	26	10	23	14	95	24	27	15	46	45	15	32	7	3	33	9	1	30	13	19	14	25	37	6	3	14	19	34	30	9	175	29	5	36	1022	28.3889	1
TAATACTGCCTGGTAATGAT_bta-miR-200b	6	55	11	6	23	57	34	21	11	7	37	80	13	14	8	4	12	7	0	42	3	19	11	22	12	10	6	17	9	21	17	17	125	24	1	18	780	21.6667	1
TAATACTGCCTGGTAATGATA_bta-miR-200b	2	200	24	52	26	155	193	58	45	14	135	244	57	108	27	27	66	17	3	69	22	49	53	87	82	23	13	33	53	86	88	47	507	93	19	89	2866	79.6111	1
TAATACTGCCTGGTAATGATG_bta-miR-200b	281	3821	807	628	1569	1415	2228	776	845	872	3110	4355	693	1400	1229	809	1008	918	166	2320	320	1081	512	952	2145	1167	396	372	652	1217	947	1324	4188	854	898	1131	47406	1316.83	1
TAATACTGCCTGGTAATGATGA_bta-miR-200b	350	2760	945	459	1718	2513	848	736	593	429	2797	5592	427	748	1136	1024	495	532	102	2538	222	1643	680	766	761	460	392	311	529	1057	547	1310	5059	756	560	447	42242	1173.39	1
TAATACTGCCTGGTAATGATGAA_bta-miR-200b	35	251	67	172	144	403	299	114	158	60	291	470	96	167	118	101	170	61	33	159	67	88	131	139	131	63	33	84	95	225	113	181	695	146	73	60	5693	158.139	1
TAATACTGCCTGGTAATGATGAAA_bta-miR-200b	11	40	13	4	29	31	23	11	5	13	23	67	6	6	14	12	10	7	6	28	6	18	6	12	14	9	5	2	5	16	9	26	36	10	12	6	551	15.3056	0
TAATACTGCCTGGTAATGATGAC_bta-miR-200b	5600	22740	7245	14784	19716	23630	21655	9206	13412	13455	35940	43310	7190	13782	34199	26255	15161	12038	4889	22030	6255	11848	10314	9950	16840	19334	7209	7947	7269	15432	7127	25652	34984	6777	19759	5242	578176	16060.4	1
TAATACTGCCTGGTAATGATGACA_bta-miR-200b	1202	5416	1436	1778	3041	4089	2903	1476	1883	1537	6077	10279	1156	2460	5064	3421	1851	1605	575	3930	907	2326	1324	1757	2425	2204	1006	963	1175	2341	1330	4017	7196	1218	2165	820	94353	2620.92	1
TAATACTGCCTGGTAATGATGACC_bta-miR-200b	386	1798	564	1179	1567	2235	2225	736	1038	716	2413	3206	1060	1886	1318	1029	1297	1014	259	1265	643	1073	1069	1019	1110	869	405	616	793	1292	1221	1653	2654	669	1300	874	44451	1234.75	1
TAATACTGCCTGGTAATGATGACG_bta-miR-200b	93	682	137	265	321	416	437	151	612	257	628	692	210	1020	589	498	962	202	118	283	458	195	253	177	446	400	130	154	135	287	206	463	589	139	493	169	13267	368.528	1
TAATACTGCCTGGTAATGATGACT_bta-miR-200b	329	5709	879	2276	2587	3699	5584	1276	1634	1359	4324	3374	1906	3601	2889	2068	2714	1372	448	1648	1207	1470	2130	2093	2784	2075	566	1004	1476	2548	2291	3244	5794	1697	1954	2325	84334	2342.61	1
TAATACTGCCTGGTAATGATGAG_bta-miR-200b	1	51	7	16	8	46	33	12	50	6	28	30	4	94	14	11	104	4	5	15	31	10	21	18	16	18	5	9	15	26	23	18	62	24	15	7	857	23.8056	1
TAATACTGCCTGGTAATGATGAT_bta-miR-200b	284	1515	414	2906	726	4319	4291	1473	1974	556	2655	2199	1562	2299	1175	913	2880	463	315	761	1050	488	2175	1646	1172	672	275	1463	1205	2576	1620	1897	6649	1713	784	1070	60135	1670.42	1
TAATACTGCCTGGTAATGATGATA_bta-miR-200b	2	33	4	3	17	20	9	4	3	8	15	18	8	5	15	7	7	3	2	11	4	10	2	5	6	4	3	5	4	12	9	13	32	7	4	8	322	8.94444	0
TAATACTGCCTGGTAATGATGATT_bta-miR-200b	1	52	9	10	12	29	37	8	3	2	45	21	13	32	12	8	15	9	2	18	9	17	13	27	32	14	0	3	13	18	17	18	62	19	11	20	631	17.5278	0
TAATACTGCCTGGTAATGATGC_bta-miR-200b	0	20	9	27	17	45	32	12	9	6	28	32	10	15	5	6	18	12	1	13	8	11	19	24	10	5	4	11	17	16	17	22	89	16	7	28	621	17.25	0
TAATACTGCCTGGTAATGATGG_bta-miR-200b	1	79	16	0	17	53	5	14	52	5	33	68	6	101	4	9	87	7	0	20	34	14	7	15	22	2	1	5	4	17	19	18	101	16	3	17	872	24.2222	1
TAATACTGCCTGGTAATGATGGC_bta-miR-200b	18	82	37	46	100	107	127	55	57	58	166	195	44	85	140	109	72	60	24	126	25	50	53	59	87	92	35	31	31	84	44	110	195	52	99	24	2779	77.1944	1
TAATACTGCCTGGTAATGATGGCA_bta-miR-200b	7	29	4	4	14	18	13	8	11	7	27	57	8	10	24	14	7	9	0	27	2	8	6	9	8	7	4	4	2	11	6	15	25	6	7	6	424	11.7778	0
TAATACTGCCTGGTAATGATGGCT_bta-miR-200b	2	34	7	5	17	18	25	7	6	4	27	16	6	18	15	10	8	8	0	3	4	13	10	14	15	10	2	5	10	10	8	15	36	13	11	5	417	11.5833	0
TAATACTGCCTGGTAATGATGGT_bta-miR-200b	7	6	3	30	5	48	42	16	13	7	31	11	12	23	3	9	24	10	2	10	8	6	14	10	18	8	1	16	7	20	13	12	73	16	10	8	552	15.3333	0
TAATACTGCCTGGTAATGATGT_bta-miR-200b	11	164	38	37	68	175	128	52	42	30	113	163	42	90	22	20	60	28	5	110	22	74	74	82	72	28	5	24	58	80	69	57	408	98	27	92	2668	74.1111	1
TAATACTGCCTGGTAATGATGTC_bta-miR-200b	2	23	6	12	14	16	33	15	15	14	22	34	6	8	20	19	13	5	1	10	5	10	16	6	18	9	4	6	9	14	10	19	37	7	17	8	483	13.4167	0
TAATACTGCCTGGTAATGATT_bta-miR-200b	1	15	2	13	2	27	44	8	1	1	13	13	2	11	3	3	16	3	0	8	4	5	8	11	9	1	2	11	8	13	28	11	93	16	2	16	424	11.7778	0
TAATACTGTCTGGTAATGC_ssc-miR-429	3	18	11	0	8	10	16	4	5	15	26	32	6	5	19	10	9	11	0	21	2	10	10	11	11	4	4	1	9	21	5	9	34	9	8	3	380	10.5556	0
TAATACTGTCTGGTAATGCC_ssc-miR-429	11	74	25	17	59	42	44	17	15	28	72	170	17	27	65	31	24	26	4	86	7	32	26	30	47	28	17	15	21	43	31	50	100	15	21	15	1352	37.5556	1
TAATACTGTCTGGTAATGCCA_ssc-miR-429	3	31	25	6	16	44	32	16	17	15	36	96	14	14	15	10	18	12	3	55	6	27	15	21	25	9	6	14	25	41	24	26	132	19	9	13	890	24.7222	1
TAATACTGTCTGGTAATGCCG_ssc-miR-429	56	370	187	102	243	355	216	117	131	139	450	937	84	195	230	174	129	160	15	625	43	210	101	187	232	151	76	82	94	279	93	299	727	98	116	101	7804	216.778	1
TAATACTGTCTGGTAATGCCGA_ssc-miR-429	5	38	11	22	21	85	50	38	30	7	42	70	17	41	8	12	31	9	2	36	10	20	20	44	18	2	1	23	20	54	14	26	183	31	6	14	1061	29.4722	1
TAATACTGTCTGGTAATGCCGC_ssc-miR-429	67	212	117	300	207	702	516	304	280	120	579	635	233	266	224	214	373	130	31	348	88	135	305	262	247	127	75	245	207	451	234	339	1335	214	158	162	10442	290.056	1
TAATACTGTCTGGTAATGCCGG_ssc-miR-429	2	31	11	10	17	53	32	17	104	9	25	54	9	123	9	16	164	10	1	39	54	19	20	18	33	4	5	15	14	33	17	19	89	23	10	20	1129	31.3611	1
TAATACTGTCTGGTAATGCCGT_ssc-miR-429	367	1749	703	868	1386	2899	1700	1149	1136	741	2820	4803	631	1203	1590	1243	1150	807	135	2520	378	1039	970	1270	1150	739	427	776	836	1846	789	1650	5055	923	828	593	48869	1357.47	1
TAATACTGTCTGGTAATGCCGTA_ssc-miR-429	5	17	6	5	14	11	9	9	7	3	25	59	3	7	9	9	6	5	0	27	5	14	9	4	5	0	4	7	1	7	5	13	39	1	6	1	357	9.91667	0
TAATACTGTCTGGTAATGCCGTT_ssc-miR-429	0	31	6	3	15	14	19	9	3	4	21	38	2	6	11	5	6	9	0	16	6	7	6	5	10	7	3	2	7	13	2	4	52	15	0	14	371	10.3056	0
TAATACTGTCTGGTAATGCCT_ssc-miR-429	1	13	8	10	7	42	24	16	9	3	13	13	5	13	8	3	12	6	0	18	2	7	9	13	10	8	2	15	7	11	4	21	67	9	2	14	425	11.8056	0
TAATACTGTCTGGTAATGCT_ssc-miR-429	1	11	6	12	1	48	27	14	9	2	36	37	9	15	5	5	20	5	0	10	3	2	16	6	12	3	0	11	11	25	16	9	85	14	3	18	507	14.0833	0
TAATCCTTGCTACCTGGGTGAGAGT_bta-miR-500	6	34	11	16	35	24	25	28	24	13	24	83	7	8	25	25	25	13	0	21	12	15	20	25	21	14	14	19	16	28	15	25	48	16	25	18	778	21.6111	1
TAATGCCCCTAAAAATCCTTAC_ssc-miR-365-3p	3	21	15	4	19	27	15	36	16	7	15	33	3	19	9	3	6	4	1	24	5	15	7	12	9	2	9	6	32	23	12	5	49	14	11	10	501	13.9167	0
TAATGCCCCTAAAAATCCTTAT_ssc-miR-365-3p	11	47	38	6	47	101	25	57	27	18	65	148	3	40	26	17	10	9	8	76	15	50	14	37	15	6	16	17	47	68	24	22	143	44	10	8	1315	36.5278	1
TAATGGATTTTTGGAGCT_bta-miR-1246	21	11	6	9	20	16	18	18	8	26	23	5	17	34	11	3	11	5	21	6	25	2	9	10	16	6	2	9	7	17	11	13	6	11	6	4	443	12.3056	0
TAATTTTATGTATAAGCTAGC_hsa-miR-590-3p	2	6	8	6	6	26	7	12	2	2	18	15	5	6	4	1	7	6	0	8	2	13	7	27	7	1	7	4	10	13	5	8	22	7	8	15	303	8.41667	0
TAATTTTATGTATAAGCTAGT_hsa-miR-590-3p	22	30	36	24	73	108	52	45	26	16	83	188	16	39	37	17	21	55	11	86	12	36	33	107	40	39	11	36	47	65	20	43	129	38	24	36	1701	47.25	1
TACAGTACTGTGATAACTGA_ssc-miR-101	46	182	44	58	99	81	159	97	43	86	167	355	26	63	153	142	76	146	41	107	20	60	76	101	167	138	43	61	50	121	42	147	123	46	118	76	3560	98.8889	1
TACAGTACTGTGATAACTGAA_ssc-miR-101	90	262	134	134	302	275	267	192	101	163	370	557	63	118	281	283	147	361	85	282	57	176	163	270	275	223	104	143	155	231	75	332	233	99	267	132	7402	205.611	1
TACAGTACTGTGATAACTGAAA_ssc-miR-101	41	126	65	72	145	132	129	92	55	62	150	226	35	53	109	113	68	116	40	122	24	64	64	136	110	93	42	67	66	86	37	114	125	29	82	74	3164	87.8889	1
TACAGTACTGTGATAACTGAAG_ssc-miR-101	174	418	167	267	509	375	423	275	205	336	653	775	101	201	603	474	320	514	131	468	99	259	246	345	535	391	174	243	211	443	119	557	386	190	369	199	12155	337.639	1
TACAGTACTGTGATAACTGAAGA_ssc-miR-101	19	120	47	28	95	78	56	53	30	37	109	174	14	30	83	55	34	63	15	82	17	53	31	53	67	48	29	35	44	64	11	76	74	23	63	38	1948	54.1111	1
TACAGTACTGTGATAACTGAAGT_ssc-miR-101	6	16	5	10	15	32	41	23	7	6	15	20	5	13	24	13	19	19	5	12	2	9	9	9	18	18	7	2	11	17	6	17	39	11	9	15	505	14.0278	0
TACAGTACTGTGATAACTGAAT_ssc-miR-101	3	10	6	25	12	14	21	16	12	6	14	10	6	8	13	11	6	14	1	11	5	13	13	19	34	21	1	4	8	23	6	22	38	8	9	14	457	12.6944	0
TACCACAGGGTAGAACCACGG_ssc-miR-140-3p	11	67	16	21	38	32	68	13	26	21	46	66	23	44	32	37	51	57	11	45	2	12	17	23	63	31	9	12	28	55	34	30	42	17	47	37	1184	32.8889	1
TACCACAGGGTAGAACCACGGA_ssc-miR-140-3p	8	68	23	27	45	49	58	21	19	27	56	97	9	31	33	22	17	51	5	49	10	27	25	30	43	24	6	21	24	52	28	38	50	18	38	39	1188	33	1
TACCACAGGGTAGAACCACGGAC_ssc-miR-140-3p	12	34	17	12	39	51	16	25	9	19	36	77	7	38	21	30	8	24	3	27	11	17	18	32	28	10	7	6	20	34	12	28	34	16	29	11	818	22.7222	1
TACCACAGGGTAGAACCACGGACA_ssc-miR-140-3p	33	93	38	30	55	42	33	47	22	15	69	147	30	29	48	33	20	44	21	55	5	48	22	37	31	31	22	22	26	47	27	32	67	34	26	34	1415	39.3056	1
TACCACAGGGTAGAACCACGGACT_ssc-miR-140-3p	1	45	5	14	13	15	39	14	11	12	14	21	7	14	5	5	18	16	1	12	3	7	10	14	20	10	3	8	5	21	9	10	36	11	10	15	474	13.1667	0
TACCCATTGCATATCGGAGTTG_hsa-miR-660-5p	32	29	45	14	69	60	16	28	14	22	93	172	9	17	36	32	17	31	3	105	7	28	33	57	42	25	12	25	22	54	14	49	94	22	17	22	1367	37.9722	1
TACCCATTGCATATCGGAGTTGT_hsa-miR-660-5p	2	20	11	27	28	45	27	38	18	15	39	63	12	11	17	18	27	19	1	39	7	18	18	39	20	20	6	12	22	22	10	34	58	15	19	20	817	22.6944	1
TACCCTGTAGAACCGAATC_ssc-miR-10b	4	1	3	20	4	18	20	14	17	11	14	5	8	19	12	9	15	3	5	4	11	5	13	14	8	5	2	7	11	27	8	17	27	12	4	8	385	10.6944	0
TACCCTGTAGAACCGAATT_ssc-miR-10b	21	71	28	76	79	108	146	79	48	78	100	97	35	76	170	138	121	77	48	68	40	48	59	73	69	42	31	75	72	118	43	157	140	55	82	58	2826	78.5	1
TACCCTGTAGAACCGAATTT_ssc-miR-10b	5	17	9	11	23	25	19	19	12	7	33	15	6	19	36	20	24	20	11	17	8	9	12	19	19	8	5	17	22	35	7	33	38	11	13	14	618	17.1667	0
TACCCTGTAGAACCGAATTTA_ssc-miR-10b	3	10	4	13	8	32	15	19	12	5	10	21	6	5	14	8	13	7	3	9	3	3	4	10	3	3	1	2	6	20	3	15	23	11	3	5	332	9.22222	0
TACCCTGTAGAACCGAATTTG_ssc-miR-10b	83	392	205	201	409	363	250	262	151	248	412	698	92	261	613	432	254	315	125	314	125	251	195	219	241	227	117	158	203	321	121	534	364	148	341	114	9759	271.083	1
TACCCTGTAGAACCGAATTTGA_ssc-miR-10b	2	25	9	46	11	75	67	62	36	11	29	30	32	44	27	13	45	13	9	23	24	12	55	71	25	7	2	33	49	51	22	49	99	46	13	33	1200	33.3333	1
TACCCTGTAGAACCGAATTTGC_ssc-miR-10b	86	278	206	611	301	685	705	616	303	260	517	368	207	431	552	378	614	287	205	271	262	178	542	512	331	236	107	422	513	842	368	720	831	329	367	279	14720	408.889	1
TACCCTGTAGAACCGAATTTGG_ssc-miR-10b	9	46	16	34	20	42	32	37	119	13	22	38	15	195	27	16	226	19	5	29	112	16	31	19	35	12	5	21	24	43	26	49	53	23	11	20	1460	40.5556	1
TACCCTGTAGAACCGAATTTGT_ssc-miR-10b	531	1883	1199	1755	2366	3029	2606	2247	1298	1405	2476	2907	745	1701	3544	2249	1799	1696	732	1607	913	1167	2044	2005	1580	1232	615	1411	1836	2877	1281	3314	3151	1264	1868	1239	65572	1821.44	1
TACCCTGTAGAACCGAATTTGTA_ssc-miR-10b	18	144	76	154	114	207	178	169	72	83	163	264	62	144	166	116	168	49	57	54	75	57	152	153	79	64	23	117	152	212	86	194	216	98	85	49	4270	118.611	1
TACCCTGTAGAACCGAATTTGTG_ssc-miR-10b	618	2345	1276	1618	2972	2092	1956	1621	1244	2239	2902	3801	665	2001	5368	3937	1807	1933	1272	1561	1063	1313	1631	1551	1816	1782	718	1300	1400	2431	921	4115	1735	879	2908	863	69654	1934.83	1
TACCCTGTAGAACCGAATTTGTGA_ssc-miR-10b	46	141	50	80	97	103	118	85	39	86	106	180	13	66	172	141	59	77	49	80	36	61	42	75	79	62	25	51	66	104	37	190	120	58	81	28	2903	80.6389	1
TACCCTGTAGAACCGAATTTGTGT_ssc-miR-10b	2	30	19	37	56	65	45	25	13	23	43	29	17	34	47	29	24	20	12	24	27	16	33	43	16	19	4	17	24	41	17	50	35	13	49	24	1022	28.3889	1
TACCCTGTAGAACCGAATTTGTT_ssc-miR-10b	5	8	7	41	5	34	32	20	12	5	15	7	10	26	5	7	29	7	7	4	11	4	29	28	4	5	3	30	26	32	18	32	28	20	6	6	568	15.7778	0
TACCCTGTAGATCCGAAT_ssc-miR-10a-5p	0	16	34	54	7	6	79	5	10	15	50	35	19	21	12	3	32	53	1	12	11	4	10	17	37	30	5	5	30	40	27	7	48	15	37	58	845	23.4722	1
TACCCTGTAGATCCGAATC_ssc-miR-10a-5p	1	18	5	50	5	7	143	18	10	16	34	7	21	24	7	5	48	12	3	10	14	1	8	18	36	8	1	12	38	36	30	9	72	24	12	56	819	22.75	1
TACCCTGTAGATCCGAATT_ssc-miR-10a-5p	11	244	66	186	72	53	611	56	67	109	282	149	73	116	61	45	282	107	21	93	56	45	45	76	310	162	23	53	106	162	116	91	385	105	136	213	4788	133	1
TACCCTGTAGATCCGAATTC_ssc-miR-10a-5p	4	19	12	41	8	17	109	7	13	5	25	5	15	15	4	1	42	9	3	5	9	3	8	10	26	10	1	4	13	21	34	6	68	12	6	35	625	17.3611	0
TACCCTGTAGATCCGAATTT_ssc-miR-10a-5p	7	179	73	166	75	54	590	67	66	73	245	148	88	136	54	31	193	150	15	94	50	42	73	80	253	177	20	46	108	130	134	65	298	104	121	213	4418	122.722	1
TACCCTGTAGATCCGAATTTA_ssc-miR-10a-5p	2	42	11	10	3	5	62	10	8	5	19	29	12	7	5	0	25	5	1	7	5	5	9	11	20	8	1	5	6	11	18	8	79	19	4	13	490	13.6111	0
TACCCTGTAGATCCGAATTTG_ssc-miR-10a-5p	49	1275	199	259	322	229	1136	200	174	340	955	798	188	295	185	156	532	264	38	499	127	214	116	202	893	558	85	97	224	431	240	246	1162	336	238	390	13652	379.222	1
TACCCTGTAGATCCGAATTTGA_ssc-miR-10a-5p	1	94	19	73	15	43	399	63	51	18	90	55	40	61	15	10	154	16	4	30	30	16	35	32	92	34	4	32	72	87	63	28	349	119	9	105	2358	65.5	1
TACCCTGTAGATCCGAATTTGC_ssc-miR-10a-5p	50	926	197	1089	302	329	4579	486	405	452	1379	526	630	771	223	180	1776	369	93	431	308	133	397	332	1632	738	96	406	722	1050	739	460	2850	827	391	1127	27401	761.139	1
TACCCTGTAGATCCGAATTTGG_ssc-miR-10a-5p	3	139	14	56	32	25	192	36	139	15	79	48	24	318	10	7	728	17	3	31	132	10	20	22	188	36	6	16	33	70	38	12	188	69	19	100	2875	79.8611	1
TACCCTGTAGATCCGAATTTGT_ssc-miR-10a-5p	267	7539	1339	3420	2007	1717	15983	1713	1836	2535	7183	3694	1967	2900	1553	1033	5646	1986	357	2805	1150	982	1414	1640	7975	4302	582	1156	2675	4298	2475	2040	10584	3459	1929	4229	118370	3288.06	1
TACCCTGTAGATCCGAATTTGTA_ssc-miR-10a-5p	7	209	29	64	32	49	337	46	35	34	179	146	55	77	31	27	134	24	9	46	34	22	43	40	127	62	7	35	58	102	62	43	285	119	22	78	2709	75.25	1
TACCCTGTAGATCCGAATTTGTG_ssc-miR-10a-5p	82	3307	416	597	848	426	3330	427	413	1009	2541	1846	503	945	685	554	1394	531	128	928	322	399	404	415	2606	1677	216	246	607	1001	582	790	2020	671	686	969	34521	958.917	1
TACCCTGTAGATCCGAATTTGTGA_ssc-miR-10a-5p	16	255	37	35	59	29	208	42	21	49	167	136	30	54	31	18	72	31	7	67	26	31	17	28	117	64	6	15	48	58	29	29	278	59	28	55	2252	62.5556	1
TACCCTGTAGATCCGAATTTGTGC_ssc-miR-10a-5p	5	135	12	77	30	31	310	40	22	37	104	33	52	75	17	8	115	23	10	28	29	8	36	27	93	57	6	34	52	73	62	39	231	71	20	120	2122	58.9444	1
TACCCTGTAGATCCGAATTTGTGT_ssc-miR-10a-5p	23	1028	94	220	225	147	1001	125	116	197	574	305	172	287	112	49	408	126	28	147	91	83	137	161	532	347	40	73	214	285	181	133	711	271	149	376	9168	254.667	1
TACCCTGTAGATCCGAATTTGTT_ssc-miR-10a-5p	0	31	7	16	6	11	102	13	12	9	29	9	9	17	6	2	41	6	1	9	2	3	11	10	34	7	1	7	18	35	23	11	65	22	8	22	615	17.0833	0
TACTAGACTGAAGCTCCTTGAGG_ssc-miR-151-3p	17	27	25	34	55	30	46	26	37	40	62	68	4	41	83	52	24	55	29	26	18	18	18	18	37	34	24	39	25	26	20	55	29	10	66	22	1240	34.4444	1
TACTCCAGCCTGGGCAACATAGCGAGACCCCGTCTCTT_ssc-miR-1285	34	16	20	28	48	40	17	27	30	4	38	15	21	26	14	8	13	49	27	24	34	15	32	1	29	4	17	31	11	41	31	48	40	15	14	22	884	24.5556	1
TACTGCAGAGAGTGGCAATCATG_ENSSSCG00000025302	30	48	52	22	34	28	16	44	25	12	48	34	3	25	16	7	9	10	8	32	8	29	11	19	15	4	9	7	13	19	5	20	33	10	15	9	729	20.25	1
TAGAAGACTAGTGATTTTGTTGTT_hsa-mir-7-1	10	21	13	30	20	27	33	26	23	22	29	41	15	21	26	26	43	16	12	16	13	7	24	15	38	28	20	29	15	37	9	28	17	26	19	25	820	22.7778	1
TAGACTGAAGCTCCTTGAGA_ssc-miR-151-3p	2	18	5	16	7	11	32	14	12	15	28	34	9	21	14	21	19	20	13	8	4	7	14	14	31	18	7	11	13	26	8	25	35	12	23	11	578	16.0556	0
TAGACTGAAGCTCCTTGAGG_ssc-miR-151-3p	107	192	142	188	225	170	246	195	141	168	256	404	64	171	359	278	179	269	126	166	79	117	118	128	225	205	120	135	141	177	106	385	182	97	316	112	6689	185.806	1
TAGACTGAAGCTCCTTGAGGA_ssc-miR-151-3p	47	89	73	103	155	96	144	100	84	98	189	208	56	86	176	129	70	169	87	104	33	55	85	71	152	101	77	87	65	91	68	161	92	56	186	76	3719	103.306	1
TAGACTGAAGCTCCTTGAGGAA_ssc-miR-151-3p	23	52	28	33	47	30	54	41	20	38	51	89	10	29	53	33	21	67	29	33	17	16	36	28	67	37	23	24	28	26	20	52	39	19	73	18	1304	36.2222	1
TAGACTGAAGCTCCTTGAGGT_ssc-miR-151-3p	5	22	9	30	40	27	62	13	13	16	44	35	15	31	25	18	25	11	8	19	5	9	25	19	33	20	7	14	17	21	14	37	43	12	37	32	813	22.5833	1
TAGCACCATCTGAAAT_ssc-miR-29a	1	2	17	23	4	3	43	0	3	12	28	19	10	1	9	3	20	26	0	8	7	1	5	5	21	9	1	1	21	29	7	7	18	13	12	10	399	11.0833	0
TAGCACCATCTGAAATC_ssc-miR-29a	2	9	3	35	24	9	83	5	13	25	38	11	8	8	31	32	14	35	1	14	5	5	13	13	72	54	8	18	11	17	19	38	7	7	36	20	743	20.6389	1
TAGCACCATCTGAAATCGGT_ssc-miR-29a	0	4	15	9	10	6	49	4	2	2	21	24	9	3	2	1	5	25	0	7	2	8	4	15	11	7	5	0	3	14	24	4	31	6	4	32	368	10.2222	0
TAGCACCATCTGAAATCGGTT_ssc-miR-29a	4	60	21	29	36	45	138	31	23	16	85	135	24	30	26	16	41	43	0	73	8	19	22	67	105	27	4	17	40	65	34	22	172	39	21	53	1591	44.1944	1
TAGCACCATCTGAAATCGGTTA_ssc-miR-29a	5	103	70	18	111	137	59	36	14	23	100	266	7	10	37	38	15	52	1	138	9	82	49	114	57	13	17	24	34	57	10	83	198	36	22	34	2079	57.75	1
TAGCAGCACATCATGGTTTACA_ssc-miR-15b	39	78	61	12	54	55	12	56	21	14	58	257	8	27	35	26	3	31	13	76	8	66	15	43	25	6	9	12	32	50	8	47	103	22	13	20	1415	39.3056	1
TAGCAGCACGTAAATATTGG_ssc-miR-16	12	26	25	1	26	27	6	17	8	8	21	78	3	10	14	9	3	15	1	28	2	20	2	20	9	2	11	9	18	13	10	18	50	5	8	11	546	15.1667	0
TAGCAGCACGTAAATATTGGC_ssc-miR-16	11	62	42	16	37	36	47	41	21	26	56	105	11	26	22	24	14	38	10	54	14	34	10	29	30	19	8	25	19	44	10	38	100	26	22	26	1153	32.0278	1
TAGCAGCACGTAAATATTGGCG_ssc-miR-16	17	73	60	32	95	80	32	61	37	39	72	260	7	54	48	22	23	55	11	74	12	69	18	46	34	12	20	16	33	43	17	56	104	27	21	16	1696	47.1111	1
TAGCAGCACGTAAATATTGGCGT_ssc-miR-16	21	47	50	21	69	92	52	78	40	23	59	155	16	45	47	36	25	43	12	47	16	44	30	60	25	16	11	43	37	57	26	43	108	30	28	34	1586	44.0556	1
TAGCAGCGGGAACAGTACC_ssc-miR-503	6	7	9	57	18	41	71	34	24	23	28	10	14	26	40	30	42	19	13	11	24	10	32	38	55	26	13	43	21	40	27	48	32	12	45	26	1015	28.1944	1
TAGCAGCGGGAACAGTACT_ssc-miR-503	44	92	59	162	145	153	220	98	87	162	149	130	47	131	252	142	119	119	94	108	90	86	156	111	218	165	53	167	111	174	107	257	124	56	159	81	4628	128.556	1
TAGCAGCGGGAACAGTACTA_ssc-miR-503	2	25	12	10	17	35	27	25	10	13	28	35	11	20	13	17	15	10	8	13	11	12	32	30	31	8	8	19	19	29	10	23	49	17	3	18	665	18.4722	0
TAGCAGCGGGAACAGTACTG_ssc-miR-503	118	426	214	164	594	385	365	233	180	341	491	672	107	278	629	458	246	404	147	457	173	291	304	306	528	387	133	183	244	501	129	507	312	178	357	187	11629	323.028	1
TAGCAGCGGGAACAGTACTGA_ssc-miR-503	12	36	18	5	43	47	32	25	22	18	35	46	4	22	50	36	16	35	11	32	3	34	24	36	39	17	12	18	23	35	8	31	36	15	22	18	916	25.4444	1
TAGCAGCGGGAACAGTACTGAAA_bta-miR-503-5p	10	27	21	2	14	21	9	8	14	7	11	30	8	11	18	20	4	13	7	23	13	15	10	13	6	5	8	6	13	15	8	14	16	8	15	3	446	12.3889	0
TAGCAGCGGGAACAGTACTGC_ssc-miR-503	16	47	42	18	55	78	48	49	12	29	61	222	9	24	39	31	11	39	10	49	18	35	28	57	43	36	12	42	19	58	27	59	70	22	27	22	1464	40.6667	1
TAGCAGCGGGAACAGTACTGCA_ssc-miR-503	19	47	41	16	85	105	29	54	23	38	108	180	21	22	27	44	26	39	14	123	19	38	38	92	60	27	22	33	43	100	22	87	98	30	27	26	1823	50.6389	1
TAGCAGCGGGAACAGTACTGCAG_ssc-miR-503	48	106	119	57	234	267	66	175	90	63	211	514	41	92	108	122	44	121	18	285	34	170	80	206	136	59	52	77	89	172	56	174	256	61	59	64	4526	125.722	1
TAGCAGCGGGAACAGTACTGCAGA_ssc-miR-503	59	115	73	35	171	205	36	124	50	36	141	374	18	40	68	50	25	92	18	163	21	127	64	113	77	21	41	38	47	102	41	94	171	51	27	52	2980	82.7778	1
TAGCAGCGGGAACAGTACTGCAGT_ssc-miR-503	7	11	18	12	50	51	22	31	10	13	32	68	8	20	28	17	9	14	3	26	8	37	24	42	21	4	5	13	16	32	17	47	43	15	15	19	808	22.4444	1
TAGCAGCGGGAACAGTACTGT_ssc-miR-503	1	7	6	11	6	34	15	24	13	5	18	22	5	10	5	1	7	1	0	6	5	7	16	16	13	3	2	7	9	24	11	11	23	11	0	5	360	10	0
TAGCATATCAGACTGATGTTGAC_hsa-mir-21	19	78	28	49	94	62	113	34	27	68	117	124	16	58	97	86	47	74	23	66	14	33	54	70	84	55	17	49	37	72	22	98	65	20	79	36	2085	57.9167	1
TAGCCACTGTACTCCAGCCTGGGCAACATAGCGAGACCCCGTCTCTT_ssc-miR-1285	16	9	3	30	17	21	12	7	13	0	39	8	9	6	5	14	12	35	15	11	15	7	23	1	8	1	6	14	10	10	20	45	21	15	9	11	498	13.8333	0
TAGCCAGTTTGGGAAGAATG_ssc-mir-7857	6	18	13	3	7	7	9	11	4	11	10	25	2	4	10	10	6	9	0	16	6	15	6	4	12	7	7	4	6	12	1	8	17	6	4	2	298	8.27778	0
[truncated: 952 more rows]
